# Supplementary material for: Comparative N-Glycoproteomics Analysis of Clinical Samples Via Different Mass Spectrometry Dissociation Methods
Source: Front Chem. 2022 Feb 24;10:839470. doi: 10.3389/fchem.2022.839470 (PMC8907888; doi:10.3389/fchem.2022.839470)
Supplement: Supplementary file 1 [file DataSheet1.ZIP]

Archive with 6 entries (6 files):
- Table S2-Intact N-glycopeptides identified from IgAN patients' urine using five methods.xls
- Table S3-Intact N-glycopeptides identified from HepG2 cells using five methods.xls
- Table S4-Intact N-glycopeptides identified fromTC patients' tissues using five methods.xls
- Table S5-Statistical analysis of the number of localized N-glycopeptide spectral matches (glycoPSMs), N-glycans, and intact N-glycopeptides from human plasma, urine, cells, and tissues.xls
- Table S6-Site-specific N-glycosylation of alpha-1-acid glycoprotein 1 from human plasma.xls
- Table S1-Intact N-glycopeptides identified from PCa patients' plasma using five methods.xls
