# Supplementary material for: Comparative N-Glycoproteomics Analysis of Clinical Samples Via Different Mass Spectrometry Dissociation Methods
Source: Front Chem. 2022 Feb 24;10:839470. doi: 10.3389/fchem.2022.839470 (PMC8907888; doi:10.3389/fchem.2022.839470)
Supplement: Supplementary file 1 [file DataSheet1.ZIP › Table S1-Intact N-glycopeptides identified from PCa patients' plasma using five methods.xls]

## Sheet: EThcD-R1
Query #:z	Protein Rank	Peptide < ProteinMetrics Confidential >	Glycans NHFAGNa	Modification Type(s)	Observed m/z	z	Observed (M+H)	Calc. mass (M+H)	Off-by-x error	Mass error (ppm)	Starting position	Cleavage	Score	Delta	Delta Mod	|Log Prob|	# of unique peptides	Protein Name	Protein DB number	Comment	Scan #	Scan Time
12564:4	10	K.C[+57.021]GLVPVLAENYN[+3704.312]KSDNC[+57.021]EDTPEAGYFAVAVVKK.S	HexNAc(7)Hex(6)Fuc(1)NeuAc(4)	C[+57]*2, N[+3704]	1841.26	4	7362.03	7362.07	0	-5.7	421	Specific	200.15	126.73	126.73	2.96	25	>sp|TRFE_HUMAN|(Common contaminant protein)	20484	20210911_zy_plasma_ethcd_1.13779.13779.4	controllerType=0 controllerNumber=1 scan=13779	61.7287
07483:4	1	K.NLFLN[+3226.132]HSEN[+2204.772]ATAK.D	HexNAc(6)Hex(7)NeuAc(3),HexNAc(4)Hex(5)NeuAc(2)	N[+2205][+3226]	1722.91	4	6888.63	6889.64	-1	-1.2	203	Specific	200.37	106.79	0	4.49	163	>sp|P00738|HPT_HUMAN Haptoglobin OS=Homo sapiens OX=9606 GN=HP PE=1 SV=1	3044	20210911_zy_plasma_ethcd_1.8205.8205.4	controllerType=0 controllerNumber=1 scan=8205	36.4907
02518:3	17	K.PSAGN[+2204.772]NSLYR.D	HexNAc(4)Hex(5)NeuAc(2)	N[+2205]	1095.1	3	3283.29	3283.3	0	-2	158	Specific	200.38	56.59	56.59	3.75	22	>sp|P02749|APOH_HUMAN Beta-2-glycoprotein 1 OS=Homo sapiens OX=9606 GN=APOH PE=1 SV=3	19971	20210911_zy_plasma_ethcd_1.2769.2769.3	controllerType=0 controllerNumber=1 scan=2769	12.3906
03137:3	81	R.N[+2553.910]YTLTGR.D	HexNAc(5)Hex(5)Fuc(1)NeuAc(2)	N[+2554]	1126.78	3	3378.32	3378.34	0	-4.4	754	Specific	200.38	42.34	42.34	0.49	2	>sp|P10643|CO7_HUMAN Complement component C7 OS=Homo sapiens OX=9606 GN=C7 PE=1 SV=2	4350	20210911_zy_plasma_ethcd_1.3447.3447.3	controllerType=0 controllerNumber=1 scan=3447	15.3837
04389:3	17	R.VYKPSAGN[+3007.058]NSLYR.D	HexNAc(5)Hex(6)Fuc(1)NeuAc(3)	N[+3007]	1492.93	3	4476.79	4475.81	1	-6.2	155	Specific	200.75	72.94	72.94	4.31	22	>sp|P02749|APOH_HUMAN Beta-2-glycoprotein 1 OS=Homo sapiens OX=9606 GN=APOH PE=1 SV=3	19971	20210911_zy_plasma_ethcd_1.4818.4818.3	controllerType=0 controllerNumber=1 scan=4818	21.4913
02960:3	36	K.DFVN[+2204.772]ASSK.Y	HexNAc(4)Hex(5)NeuAc(2)	N[+2205]	1024.73	3	3072.18	3072.19	0	-3.1	185	Specific	200.76	2.37	2.37	0.87	6	>sp|P05546|HEP2_HUMAN Heparin cofactor 2 OS=Homo sapiens OX=9606 GN=SERPIND1 PE=1 SV=3	4741	20210911_zy_plasma_ethcd_1.3253.3253.3	controllerType=0 controllerNumber=1 scan=3253	14.536
06016:3	111	R.VELEDFNGN[+2350.830]R.T	HexNAc(4)Hex(5)Fuc(1)NeuAc(2)	N[+2351]	1181.8	3	3543.38	3543.39	0	-2.1	181	Specific	201.02	79.75	79.75	1.79	1	>sp|O75636|FCN3_HUMAN Ficolin-3 OS=Homo sapiens OX=9606 GN=FCN3 PE=1 SV=2	8415	20210911_zy_plasma_ethcd_1.6600.6600.3	controllerType=0 controllerNumber=1 scan=6600	29.419
15063:3	45	K.DLQSLEDILHQVEN[+1913.677]K.T	HexNAc(4)Hex(5)NeuAc(1)	N[+1914]	1232.2	3	3694.58	3694.58	0	-2.2	65	Specific	201.11	51.13	51.13	4.27	3	>sp|P02679|FIBG_HUMAN Fibrinogen gamma chain OS=Homo sapiens OX=9606 GN=FGG PE=1 SV=3	8322	20210911_zy_plasma_ethcd_1.16514.16514.3	controllerType=0 controllerNumber=1 scan=16514	73.8428
09316:3	9	K.TVLTPATNHMGN[+1702.581]VTFTIPANR.E	HexNAc(2)Hex(8)	N[+1703]	1319.91	3	3957.73	3957.74	0	-2.9	74	Specific	201.58	131.7	131.7	5.03	22	>sp|P01024|CO3_HUMAN Complement C3 OS=Homo sapiens OX=9606 GN=C3 PE=1 SV=2	731	20210911_zy_plasma_ethcd_1.10216.10216.3	controllerType=0 controllerNumber=1 scan=10216	45.6354
04782:3	7	R.EEQFN[+2553.910]STFR.V	HexNAc(5)Hex(5)Fuc(1)NeuAc(2)	N[+2554]	1237.82	3	3711.43	3711.43	0	-0.2	172	Specific	202.19	47.69	47.69	2.76	35	>sp|P01859|IGHG2_HUMAN Immunoglobulin heavy constant gamma 2 OS=Homo sapiens OX=9606 GN=IGHG2 PE=1 SV=2	2858	20210911_zy_plasma_ethcd_1.5249.5249.3	controllerType=0 controllerNumber=1 scan=5249	23.4244
10980:3	15	R.HGIQYFNN[+2204.772]NTQHSSLFM[+15.995]LNEVK.R	HexNAc(4)Hex(5)NeuAc(2)	M[+16], N[+2205]	1614.68	3	4842.02	4842.02	0	-1.7	162	Specific	202.39	124.88	70.34	4.81	23	>sp|P01042|KNG1_HUMAN Kininogen-1 OS=Homo sapiens OX=9606 GN=KNG1 PE=1 SV=2	6533	20210911_zy_plasma_ethcd_1.12042.12042.3	controllerType=0 controllerNumber=1 scan=12042	53.882
01655:3	5	K.PREEQYN[+2100.761]STYR.V	HexNAc(5)Hex(4)Fuc(1)NeuAc(1)	N[+2101]	1181.81	3	3543.41	3543.43	0	-4.2	293	Specific	202.65	14.22	14.22	0.97	45	>sp|P0DOX5|IGG1_HUMAN Immunoglobulin gamma-1 heavy chain OS=Homo sapiens OX=9606 PE=1 SV=2	10252	20210911_zy_plasma_ethcd_1.1825.1825.3	controllerType=0 controllerNumber=1 scan=1825	8.2856
04940:4	1	K.NLFLN[+2861.000]HSEN[+2643.941]ATAK.D	HexNAc(5)Hex(6)NeuAc(3),HexNAc(6)Hex(7)NeuAc(1)	N[+2644][+2861]	1741.42	4	6962.67	6963.68	-1	0.4	203	Specific	202.87	83	0	3.46	163	>sp|P00738|HPT_HUMAN Haptoglobin OS=Homo sapiens OX=9606 GN=HP PE=1 SV=1	3044	20210911_zy_plasma_ethcd_1.5422.5422.4	controllerType=0 controllerNumber=1 scan=5422	24.1989
03807:4	1	K.NLFLN[+3226.132]HSEN[+1403.507]ATAK.D	HexNAc(6)Hex(7)NeuAc(3),HexNAc(3)Hex(4)Fuc(1)	N[+1404][+3226]	1522.84	4	6088.35	6088.37	0	-3.4	203	Specific	202.87	202.87	0	4.33	163	>sp|P00738|HPT_HUMAN Haptoglobin OS=Homo sapiens OX=9606 GN=HP PE=1 SV=1	3044	20210911_zy_plasma_ethcd_1.4181.4181.4	controllerType=0 controllerNumber=1 scan=4181	18.6752
14841:3	1	K.VVLHPN[+3663.286]YSQVDIGLIK.L	HexNAc(6)Hex(7)Fuc(1)NeuAc(4)	N[+3663]	1819.76	3	5457.28	5458.3	-1	-3.1	236	Specific	203.12	48.48	48.48	4.37	163	>sp|P00738|HPT_HUMAN Haptoglobin OS=Homo sapiens OX=9606 GN=HP PE=1 SV=1	3044	20210911_zy_plasma_ethcd_1.16270.16270.3	controllerType=0 controllerNumber=1 scan=16270	72.7572
09299:5	1	K.NLFLN[+2350.793]HSEN[+3372.190]ATAK.D	HexNAc(2)Hex(12),HexNAc(6)Hex(7)Fuc(1)NeuAc(3)	N[+2351][+3372]	1436.95	5	7180.72	7181.72	-1	0.7	203	Specific	203.94	96.03	4.48	3.23	163	>sp|P00738|HPT_HUMAN Haptoglobin OS=Homo sapiens OX=9606 GN=HP PE=1 SV=1	3044	20210911_zy_plasma_ethcd_1.10198.10198.5	controllerType=0 controllerNumber=1 scan=10198	45.5504
04300:3	17	K.LGN[+2204.772]WSAM[+15.995]PSC[+57.021]K.A	HexNAc(4)Hex(5)NeuAc(2)	C[+57], M[+16], N[+2205]	1157.78	3	3471.33	3471.33	0	-1.7	251	Specific	204.55	81.36	81.36	3.95	22	>sp|P02749|APOH_HUMAN Beta-2-glycoprotein 1 OS=Homo sapiens OX=9606 GN=APOH PE=1 SV=3	19971	20210911_zy_plasma_ethcd_1.4721.4721.3	controllerType=0 controllerNumber=1 scan=4721	21.0614
14148:3	11	K.ALPQPQN[+2204.772]VTSLLGC[+57.021]TH.-	HexNAc(4)Hex(5)NeuAc(2)	C[+57], N[+2205]	1314.22	3	3940.64	3940.65	0	-2.6	447	CRagged	204.8	101.57	101.57	4.41	28	>sp|P02790|HEMO_HUMAN Hemopexin OS=Homo sapiens OX=9606 GN=HPX PE=1 SV=2	9336	20210911_zy_plasma_ethcd_1.15512.15512.3	controllerType=0 controllerNumber=1 scan=15512	69.3907
05247:3	4	K.EHEGAIYPDN[+2569.905]TTDFQR.A	HexNAc(5)Hex(6)NeuAc(2)	N[+2570]	1488.25	3	4462.74	4462.75	0	-1.4	129	Specific	204.92	125.78	125.78	4.38	22	>sp|P00450|CERU_HUMAN Ceruloplasmin OS=Homo sapiens OX=9606 GN=CP PE=1 SV=1	460	20210911_zy_plasma_ethcd_1.5758.5758.3	controllerType=0 controllerNumber=1 scan=5758	25.7047
00975:3	57	K.N[+3007.058]GTR.G	HexNAc(5)Hex(6)Fuc(1)NeuAc(3)	N[+3007]	1152.1	3	3454.28	3454.29	0	-1.7	186	Specific	205.41	20.16	20.16	0.91	5	>sp|P01011|AACT_HUMAN Alpha-1-antichymotrypsin OS=Homo sapiens OX=9606 GN=SERPINA3 PE=1 SV=2	8788	20210911_zy_plasma_ethcd_1.1081.1081.3	controllerType=0 controllerNumber=1 scan=1081	5.0163
07549:4	1	K.NLFLN[+3517.228]HSEN[+1548.545]ATAK.D	HexNAc(6)Hex(7)NeuAc(4),HexNAc(3)Hex(4)NeuAc(1)	N[+1549][+3517]	1631.88	4	6524.5	6524.51	0	-0.9	203	Specific	205.85	205.85	0	3.78	163	>sp|P00738|HPT_HUMAN Haptoglobin OS=Homo sapiens OX=9606 GN=HP PE=1 SV=1	3044	20210911_zy_plasma_ethcd_1.8277.8277.4	controllerType=0 controllerNumber=1 scan=8277	36.8087
01993:4	6	K.SVTC[+57.021]HVKHYTN[+2116.756]SSQDVTVPC[+57.021]R.V	HexNAc(5)Hex(5)NeuAc(1)	C[+57]*2, N[+2117]	1148.98	4	4592.89	4591.91	1	-3.7	82	Specific	206.05	121.02	121.02	4.57	32	>sp|P01877|IGHA2_HUMAN Immunoglobulin heavy constant alpha 2 OS=Homo sapiens OX=9606 GN=IGHA2 PE=1 SV=4	10403	20210911_zy_plasma_ethcd_1.2194.2194.4	controllerType=0 controllerNumber=1 scan=2194	9.8682
06911:3	103	K.EYESYSDFERN[+2204.772]VTEK.M	HexNAc(4)Hex(5)NeuAc(2)	N[+2205]	1367.54	3	4100.6	4100.6	0	-1.1	233	Specific	206.35	88.32	88.32	2.09	1	>sp|P07358|CO8B_HUMAN Complement component C8 beta chain OS=Homo sapiens OX=9606 GN=C8B PE=1 SV=3	467	20210911_zy_plasma_ethcd_1.7579.7579.3	controllerType=0 controllerNumber=1 scan=7579	33.7293
07851:3	4	K.ELHHLQEQN[+3007.058]VSNAFLDK.G	HexNAc(5)Hex(6)Fuc(1)NeuAc(3)	N[+3007]	1677.02	3	5029.06	5029.06	0	-1.2	754	Specific	206.39	97.64	97.64	4.65	22	>sp|P00450|CERU_HUMAN Ceruloplasmin OS=Homo sapiens OX=9606 GN=CP PE=1 SV=1	460	20210911_zy_plasma_ethcd_1.8608.8608.3	controllerType=0 controllerNumber=1 scan=8608	38.2816
02981:3	12	R.EN[+3663.286]GTISR.Y	HexNAc(6)Hex(7)Fuc(1)NeuAc(4)	N[+3663]	1480.56	3	4439.67	4439.68	0	-0.9	102	Specific	206.47	16.22	16.22	0.67	28	>sp|P02763|A1AG1_HUMAN Alpha-1-acid glycoprotein 1 OS=Homo sapiens OX=9606 GN=ORM1 PE=1 SV=1	2208	20210911_zy_plasma_ethcd_1.3276.3276.3	controllerType=0 controllerNumber=1 scan=3276	14.6326
07423:4	1	K.NLFLN[+2861.000]HSEN[+2350.830]ATAK.D	HexNAc(5)Hex(6)NeuAc(3),HexNAc(4)Hex(5)Fuc(1)NeuAc(2)	N[+2351][+2861]	1668.15	4	6669.57	6670.56	-1	1.7	203	Specific	207.34	82.9	0	3.28	163	>sp|P00738|HPT_HUMAN Haptoglobin OS=Homo sapiens OX=9606 GN=HP PE=1 SV=1	3044	20210911_zy_plasma_ethcd_1.8139.8139.4	controllerType=0 controllerNumber=1 scan=8139	36.199
14125:3	1	K.VVLHPN[+2878.015]YSQVDIGLIK.L	HexNAc(5)Hex(7)Fuc(1)NeuAc(2)	N[+2878]	1558.35	3	4673.02	4673.03	0	-1.1	236	Specific	207.44	115.15	115.15	4.24	163	>sp|P00738|HPT_HUMAN Haptoglobin OS=Homo sapiens OX=9606 GN=HP PE=1 SV=1	3044	20210911_zy_plasma_ethcd_1.15487.15487.3	controllerType=0 controllerNumber=1 scan=15487	69.2832
01620:3	61	R.N[+2204.772]VTAEQAR.N	HexNAc(4)Hex(5)NeuAc(2)	N[+2205]	1031.74	3	3093.22	3093.23	0	-2.8	249	Specific	207.47	55.52	55.52	2.47	2	>sp|P00748|FA12_HUMAN Coagulation factor XII OS=Homo sapiens OX=9606 GN=F12 PE=1 SV=3	8187	20210911_zy_plasma_ethcd_1.1787.1787.3	controllerType=0 controllerNumber=1 scan=1787	8.1181
08670:3	11	R.SWPAVGN[+2221.788]C[+57.021]SSALR.W	HexNAc(4)Hex(6)Fuc(1)NeuAc(1)	C[+57], N[+2222]	1209.49	3	3626.45	3626.46	0	-1.2	181	Specific	207.56	97.94	97.94	4.17	28	>sp|P02790|HEMO_HUMAN Hemopexin OS=Homo sapiens OX=9606 GN=HPX PE=1 SV=2	9336	20210911_zy_plasma_ethcd_1.9506.9506.3	controllerType=0 controllerNumber=1 scan=9506	42.3379
08527:3	11	R.SWPAVGN[+2204.772]C[+57.021]SSALR.W	HexNAc(4)Hex(5)NeuAc(2)	C[+57], N[+2205]	1203.82	3	3609.43	3609.44	0	-2	181	Specific	207.58	75.06	75.06	4.39	28	>sp|P02790|HEMO_HUMAN Hemopexin OS=Homo sapiens OX=9606 GN=HPX PE=1 SV=2	9336	20210911_zy_plasma_ethcd_1.9349.9349.3	controllerType=0 controllerNumber=1 scan=9349	41.6199
04961:3	46	K.HAN[+1872.651]WTLTPLK.S	HexNAc(3)Hex(6)NeuAc(1)	N[+1873]	1018.43	3	3053.29	3053.3	0	-2.5	251	Specific	207.82	58.76	58.76	3.87	4	>sp|P27169|PON1_HUMAN Serum paraoxonase/arylesterase 1 OS=Homo sapiens OX=9606 GN=PON1 PE=1 SV=3	15463	20210911_zy_plasma_ethcd_1.5445.5445.3	controllerType=0 controllerNumber=1 scan=5445	24.3026
10408:3	29	R.IIVPLNNREN[+1913.677]ISDPTSPLR.T	HexNAc(4)Hex(5)NeuAc(1)	N[+1914]	1354.62	3	4061.86	4061.85	0	0.2	62	Specific	207.87	154.35	154.35	3.27	13	>sp|P01591|IGJ_HUMAN Immunoglobulin J chain OS=Homo sapiens OX=9606 GN=JCHAIN PE=1 SV=4	4401	20210911_zy_plasma_ethcd_1.11414.11414.3	controllerType=0 controllerNumber=1 scan=11414	51.0621
09591:3	17	K.LGN[+2861.000]WSAMPSC[+57.021]K.A	HexNAc(5)Hex(6)NeuAc(3)	C[+57], N[+2861]	1371.19	3	4111.56	4111.57	0	-2.3	251	Specific	208.03	73.4	73.4	3.96	22	>sp|P02749|APOH_HUMAN Beta-2-glycoprotein 1 OS=Homo sapiens OX=9606 GN=APOH PE=1 SV=3	19971	20210911_zy_plasma_ethcd_1.10518.10518.3	controllerType=0 controllerNumber=1 scan=10518	46.9986
02911:2	54	R.GVNFN[+1913.677]VSK.V	HexNAc(4)Hex(5)NeuAc(1)	N[+1914]	1389.57	2	2778.13	2778.13	0	-1.8	123	Specific	208.12	42.51	42.51	2.53	7	>sp|P03952|KLKB1_HUMAN Plasma kallikrein OS=Homo sapiens OX=9606 GN=KLKB1 PE=1 SV=1	11889	20210911_zy_plasma_ethcd_1.3200.3200.2	controllerType=0 controllerNumber=1 scan=3200	14.3069
09599:3	17	K.LGN[+2861.000]WSAMPSC[+57.021]K.A	HexNAc(5)Hex(6)NeuAc(3)	C[+57], N[+2861]	1371.19	3	4111.55	4111.57	0	-3.1	251	Specific	208.16	78.57	78.57	3.7	22	>sp|P02749|APOH_HUMAN Beta-2-glycoprotein 1 OS=Homo sapiens OX=9606 GN=APOH PE=1 SV=3	19971	20210911_zy_plasma_ethcd_1.10527.10527.3	controllerType=0 controllerNumber=1 scan=10527	47.0376
14027:3	12	R.QDQC[+57.021]IYN[+2861.000]TTYLNVQR.E	HexNAc(5)Hex(6)NeuAc(3)	C[+57], N[+2861]	1592.63	3	4775.87	4776.9	-1	-4.7	87	Specific	208.67	90.39	90.39	4.07	28	>sp|P02763|A1AG1_HUMAN Alpha-1-acid glycoprotein 1 OS=Homo sapiens OX=9606 GN=ORM1 PE=1 SV=1	2208	20210911_zy_plasma_ethcd_1.15380.15380.3	controllerType=0 controllerNumber=1 scan=15380	68.8148
14298:4	1	K.M[+15.995]VSHHN[+3007.058]LTTGATLINEQWLLTTAK.N	HexNAc(5)Hex(6)Fuc(1)NeuAc(3)	M[+16], N[+3007]	1426.11	4	5701.42	5702.45	-1	-4.2	179	Specific	208.8	177.18	177.18	4.44	163	>sp|P00738|HPT_HUMAN Haptoglobin OS=Homo sapiens OX=9606 GN=HP PE=1 SV=1	3044	20210911_zy_plasma_ethcd_1.15677.15677.4	controllerType=0 controllerNumber=1 scan=15677	70.1243
01505:3	23	R.HN[+2861.000]STGC[+57.021]LR.M	HexNAc(5)Hex(6)NeuAc(3)	C[+57], N[+2861]	1269.15	3	3805.43	3805.44	0	-0.7	290	Specific	208.84	57.94	57.94	1.37	17	>sp|P10909|CLUS_HUMAN Clusterin OS=Homo sapiens OX=9606 GN=CLU PE=1 SV=1	6125	20210911_zy_plasma_ethcd_1.1661.1661.3	controllerType=0 controllerNumber=1 scan=1661	7.5737
13738:3	47	R.ALGFEN[+2861.000]ATQALGR.A	HexNAc(5)Hex(6)NeuAc(3)	N[+2861]	1403.23	3	4207.69	4208.7	-1	-2.7	64	Specific	209.4	70.96	70.96	4.7	5	>sp|Q08380|LG3BP_HUMAN Galectin-3-binding protein OS=Homo sapiens OX=9606 GN=LGALS3BP PE=1 SV=1	4876	20210911_zy_plasma_ethcd_1.15064.15064.3	controllerType=0 controllerNumber=1 scan=15064	67.4215
05591:4	1	K.NLFLN[+3517.228]HSEN[+1038.375]ATAK.D	HexNAc(6)Hex(7)NeuAc(4),HexNAc(2)Hex(3)Fuc(1)	N[+1038][+3517]	1504.09	4	6013.33	6014.34	-1	-1.2	203	Specific	209.43	104.97	1.43	4.49	163	>sp|P00738|HPT_HUMAN Haptoglobin OS=Homo sapiens OX=9606 GN=HP PE=1 SV=1	3044	20210911_zy_plasma_ethcd_1.6135.6135.4	controllerType=0 controllerNumber=1 scan=6135	27.3688
12315:3	18	R.QNQC[+57.021]FYN[+3226.132]SSYLNVQR.E	HexNAc(6)Hex(7)NeuAc(3)	C[+57], N[+3226]	1716	3	5145.99	5147	-1	-1.2	87	Specific	209.6	102.28	102.28	4.47	17	>sp|P19652|A1AG2_HUMAN Alpha-1-acid glycoprotein 2 OS=Homo sapiens OX=9606 GN=ORM2 PE=1 SV=2	4531	20210911_zy_plasma_ethcd_1.13507.13507.3	controllerType=0 controllerNumber=1 scan=13507	60.52
04214:3	17	K.LGN[+2204.772]WSAM[+15.995]PSC[+57.021]K.A	HexNAc(4)Hex(5)NeuAc(2)	C[+57], M[+16], N[+2205]	1157.78	3	3471.32	3471.33	0	-2.8	251	Specific	209.71	93.81	93.81	3.97	22	>sp|P02749|APOH_HUMAN Beta-2-glycoprotein 1 OS=Homo sapiens OX=9606 GN=APOH PE=1 SV=3	19971	20210911_zy_plasma_ethcd_1.4627.4627.3	controllerType=0 controllerNumber=1 scan=4627	20.6504
12083:3	18	R.QNQC[+57.021]FYN[+3226.132]SSYLNVQR.E	HexNAc(6)Hex(7)NeuAc(3)	C[+57], N[+3226]	1716	3	5145.99	5147	-1	-0.1	87	Specific	209.73	90.1	90.1	3.84	17	>sp|P19652|A1AG2_HUMAN Alpha-1-acid glycoprotein 2 OS=Homo sapiens OX=9606 GN=ORM2 PE=1 SV=2	4531	20210911_zy_plasma_ethcd_1.13253.13253.3	controllerType=0 controllerNumber=1 scan=13253	59.3812
09214:4	1	K.NLFLN[+2861.000]HSEN[+3007.058]ATAK.D	HexNAc(5)Hex(6)NeuAc(3),HexNAc(5)Hex(6)Fuc(1)NeuAc(3)	N[+2861][+3007]	1832.2	4	7325.78	7326.79	-1	-0.6	203	Specific	209.89	88.86	0	3.97	163	>sp|P00738|HPT_HUMAN Haptoglobin OS=Homo sapiens OX=9606 GN=HP PE=1 SV=1	3044	20210911_zy_plasma_ethcd_1.10105.10105.4	controllerType=0 controllerNumber=1 scan=10105	45.1315
13209:3	1	K.VVLHPN[+3081.095]YSQVDIGLIK.L	HexNAc(6)Hex(7)Fuc(1)NeuAc(2)	N[+3081]	1626.03	3	4876.09	4876.11	0	-3.8	236	Specific	210.55	54.48	54.48	3.99	163	>sp|P00738|HPT_HUMAN Haptoglobin OS=Homo sapiens OX=9606 GN=HP PE=1 SV=1	3044	20210911_zy_plasma_ethcd_1.14484.14484.3	controllerType=0 controllerNumber=1 scan=14484	64.8473
11218:3	9	K.TVLTPATNHMGN[+1710.598]VTFTIPANR.E	HexNAc(3)Hex(5)NeuAc(1)	N[+1711]	1322.59	3	3965.75	3965.76	0	-3.2	74	Specific	210.78	76.56	76.56	4.86	22	>sp|P01024|CO3_HUMAN Complement C3 OS=Homo sapiens OX=9606 GN=C3 PE=1 SV=2	731	20210911_zy_plasma_ethcd_1.12303.12303.3	controllerType=0 controllerNumber=1 scan=12303	55.0637
06429:3	27	R.GLN[+2204.772]VTLSSTGR.N	HexNAc(4)Hex(5)NeuAc(2)	N[+2205]	1103.79	3	3309.37	3309.37	0	-2.3	1326	Specific	211.01	71.72	71.72	3.96	7	>sp|P0C0L5|CO4B_HUMAN Complement C4-B OS=Homo sapiens OX=9606 GN=C4B PE=1 SV=2	4060	20210911_zy_plasma_ethcd_1.7052.7052.3	controllerType=0 controllerNumber=1 scan=7052	31.4135
07819:4	1	K.NLFLN[+2878.015]HSEN[+2188.740]ATAK.D	HexNAc(5)Hex(7)Fuc(1)NeuAc(2),HexNAc(2)Hex(11)	N[+2189][+2878]	1631.88	4	6524.49	6525.49	-1	0.6	203	Specific	211.06	211.06	1.39	3.63	163	>sp|P00738|HPT_HUMAN Haptoglobin OS=Homo sapiens OX=9606 GN=HP PE=1 SV=1	3044	20210911_zy_plasma_ethcd_1.8573.8573.4	controllerType=0 controllerNumber=1 scan=8573	38.1276
12012:3	33	R.ADGTVNQIEGEATPVN[+2204.772]LTEPAK.L	HexNAc(4)Hex(5)NeuAc(2)	N[+2205]	1486.97	3	4458.89	4458.89	0	-0.2	83	Specific	211.26	122.83	122.83	3.9	5	>sp|P05090|APOD_HUMAN Apolipoprotein D OS=Homo sapiens OX=9606 GN=APOD PE=1 SV=1	120	20210911_zy_plasma_ethcd_1.13175.13175.3	controllerType=0 controllerNumber=1 scan=13175	59.0328
08715:3	11	R.SWPAVGN[+2350.830]C[+57.021]SSALR.W	HexNAc(4)Hex(5)Fuc(1)NeuAc(2)	C[+57], N[+2351]	1252.51	3	3755.51	3755.5	0	2.4	181	Specific	211.42	90.08	90.08	2.65	28	>sp|P02790|HEMO_HUMAN Hemopexin OS=Homo sapiens OX=9606 GN=HPX PE=1 SV=2	9336	20210911_zy_plasma_ethcd_1.9555.9555.3	controllerType=0 controllerNumber=1 scan=9555	42.5671
08115:3	15	R.ITYSIVQTN[+2861.000]C[+57.021]SK.E	HexNAc(5)Hex(6)NeuAc(3)	C[+57], N[+2861]	1425.57	3	4274.69	4274.7	0	-4	197	Specific	211.66	80.08	80.08	4.11	23	>sp|P01042|KNG1_HUMAN Kininogen-1 OS=Homo sapiens OX=9606 GN=KNG1 PE=1 SV=2	6533	20210911_zy_plasma_ethcd_1.8897.8897.3	controllerType=0 controllerNumber=1 scan=8897	39.5755
12355:3	31	R.VIDFN[+1710.598]C[+57.021]TTSSVSSALANTK.D	HexNAc(3)Hex(5)NeuAc(1)	C[+57], N[+1711]	1242.52	3	3725.55	3725.57	0	-5.1	121	Specific	211.74	117.73	117.73	4	8	>sp|P04196|HRG_HUMAN Histidine-rich glycoprotein OS=Homo sapiens OX=9606 GN=HRG PE=1 SV=1	6586	20210911_zy_plasma_ethcd_1.13550.13550.3	controllerType=0 controllerNumber=1 scan=13550	60.7123
06211:3	4	K.ELHHLQEQN[+2715.963]VSNAFLDK.G	HexNAc(5)Hex(6)Fuc(1)NeuAc(2)	N[+2716]	1579.99	3	4737.96	4737.97	0	-2.2	754	Specific	211.78	89.84	89.84	4.88	22	>sp|P00450|CERU_HUMAN Ceruloplasmin OS=Homo sapiens OX=9606 GN=CP PE=1 SV=1	460	20210911_zy_plasma_ethcd_1.6813.6813.3	controllerType=0 controllerNumber=1 scan=6813	30.3597
10387:3	3	R.GTAGNALM[+15.995]DGASQLMGEN[+2204.772]R.T	HexNAc(4)Hex(5)NeuAc(2)	M[+16], N[+2205]	1372.21	3	4114.62	4113.63	1	-3.2	377	Specific	211.85	101.58	99.75	4.4	38	>sp|P02675|FIBB_HUMAN Fibrinogen beta chain OS=Homo sapiens OX=9606 GN=FGB PE=1 SV=2	6006	20210911_zy_plasma_ethcd_1.11392.11392.3	controllerType=0 controllerNumber=1 scan=11392	50.963
01836:2	5	R.EEQYN[+1241.454]STYR.V	HexNAc(3)Hex(3)Fuc(1)	N[+1241]	1215.98	2	2430.96	2430.97	0	-4.5	295	Specific	212.47	131.37	131.37	3.59	45	>sp|P0DOX5|IGG1_HUMAN Immunoglobulin gamma-1 heavy chain OS=Homo sapiens OX=9606 PE=1 SV=2	10252	20210911_zy_plasma_ethcd_1.2022.2022.2	controllerType=0 controllerNumber=1 scan=2022	9.1351
12111:3	3	R.GTAGNALMDGASQLMGEN[+2075.730]R.T	HexNAc(4)Hex(6)NeuAc(1)	N[+2076]	1323.53	3	3968.59	3968.59	0	-0.2	377	Specific	212.53	53.98	53.98	3.45	38	>sp|P02675|FIBB_HUMAN Fibrinogen beta chain OS=Homo sapiens OX=9606 GN=FGB PE=1 SV=2	6006	20210911_zy_plasma_ethcd_1.13283.13283.4	controllerType=0 controllerNumber=1 scan=13283	59.5175
03439:3	109	R.AFGSNPN[+2204.772]LTK.V	HexNAc(4)Hex(5)NeuAc(2)	N[+2205]	1085.11	3	3253.31	3253.31	0	-2.8	68	Specific	212.72	69.99	69.99	1.8	2	>sp|P22792|CPN2_HUMAN Carboxypeptidase N subunit 2 OS=Homo sapiens OX=9606 GN=CPN2 PE=1 SV=3	2992	20210911_zy_plasma_ethcd_1.3778.3778.3	controllerType=0 controllerNumber=1 scan=3778	16.8753
06798:3	2	K.STGKPTLYN[+1419.502]VSLVM[+15.995]SDTAGTC[+57.021]Y.-	HexNAc(3)Hex(5)	C[+57], M[+16], N[+1420]	1267.54	3	3800.59	3800.6	0	-2.2	432	CRagged	212.81	114.75	114.75	4.13	55	>sp|P01871|IGHM_HUMAN Immunoglobulin heavy constant mu OS=Homo sapiens OX=9606 GN=IGHM PE=1 SV=4	10127	20210911_zy_plasma_ethcd_1.7456.7456.4	controllerType=0 controllerNumber=1 scan=7456	33.1946
01748:3	6	K.HYTN[+1987.714]SSQDVTVPC[+57.021]R.V	HexNAc(5)Hex(6)	C[+57], N[+1988]	1217.82	3	3651.45	3651.46	0	-2.6	89	Specific	213.17	24.69	24.69	3.61	32	>sp|P01877|IGHA2_HUMAN Immunoglobulin heavy constant alpha 2 OS=Homo sapiens OX=9606 GN=IGHA2 PE=1 SV=4	10403	20210911_zy_plasma_ethcd_1.1927.1927.3	controllerType=0 controllerNumber=1 scan=1927	8.7392
05655:4	1	K.NLFLN[+3083.110]HSEN[+1864.634]ATAK.D	HexNAc(8)Hex(9),HexNAc(2)Hex(9)	N[+1865][+3083]	1602.62	4	6407.45	6406.48	1	-5.2	203	Specific	213.17	96.93	0	4.25	163	>sp|P00738|HPT_HUMAN Haptoglobin OS=Homo sapiens OX=9606 GN=HP PE=1 SV=1	3044	20210911_zy_plasma_ethcd_1.6205.6205.4	controllerType=0 controllerNumber=1 scan=6205	27.6801
14927:3	11	K.ALPQPQN[+2861.000]VTSLLGC[+57.021]TH.-	HexNAc(5)Hex(6)NeuAc(3)	C[+57], N[+2861]	1532.96	3	4596.87	4596.88	0	-2.4	447	CRagged	213.22	106.79	106.79	4.41	28	>sp|P02790|HEMO_HUMAN Hemopexin OS=Homo sapiens OX=9606 GN=HPX PE=1 SV=2	9336	20210911_zy_plasma_ethcd_1.16365.16365.3	controllerType=0 controllerNumber=1 scan=16365	73.1824
02565:3	126	K.EN[+2861.000]LTAR.A	HexNAc(5)Hex(6)NeuAc(3)	N[+2861]	1188.79	3	3564.37	3564.37	0	-1.6	579	Specific	213.85	18.2	18.2	0.06	2	>sp|Q06033|ITIH3_HUMAN Inter-alpha-trypsin inhibitor heavy chain H3 OS=Homo sapiens OX=9606 GN=ITIH3 PE=1 SV=2	4115	20210911_zy_plasma_ethcd_1.2821.2821.3	controllerType=0 controllerNumber=1 scan=2821	12.6239
13052:3	1	K.MVSHHN[+1913.677]LTTGATLINEQWLLTTAK.N	HexNAc(4)Hex(5)NeuAc(1)	N[+1914]	1531.69	3	4593.06	4593.07	0	-2.6	179	Specific	214.07	90.56	90.56	4.89	163	>sp|P00738|HPT_HUMAN Haptoglobin OS=Homo sapiens OX=9606 GN=HP PE=1 SV=1	3044	20210911_zy_plasma_ethcd_1.14313.14313.3	controllerType=0 controllerNumber=1 scan=14313	64.0888
05623:3	65	R.C[+57.021]FLGN[+2204.772]GTGYR.G	HexNAc(4)Hex(5)NeuAc(2)	C[+57], N[+2205]	1117.1	3	3349.29	3349.29	0	-2.3	286	Specific	214.15	88.09	88.09	3.95	1	>sp|Q04756|HGFA_HUMAN Hepatocyte growth factor activator OS=Homo sapiens OX=9606 GN=HGFAC PE=1 SV=1	4501	20210911_zy_plasma_ethcd_1.6170.6170.3	controllerType=0 controllerNumber=1 scan=6170	27.5213
05685:3	3	R.GTAGNALMDGASQLM[+15.995]GEN[+2245.799]R.T	HexNAc(5)Hex(4)NeuAc(2)	M[+16], N[+2246]	1385.55	3	4154.64	4154.65	0	-2.4	377	Specific	214.15	103.79	103.79	4.33	38	>sp|P02675|FIBB_HUMAN Fibrinogen beta chain OS=Homo sapiens OX=9606 GN=FGB PE=1 SV=2	6006	20210911_zy_plasma_ethcd_1.6238.6238.3	controllerType=0 controllerNumber=1 scan=6238	27.8223
04304:3	79	R.C[+57.021]ATPHGDN[+2059.735]ASLEATFVK.R	HexNAc(4)Hex(5)Fuc(1)NeuAc(1)	C[+57], N[+2060]	1293.2	3	3877.58	3877.58	0	-2.2	91	Specific	214.67	84.65	84.65	2.82	1	>sp|P23142|FBLN1_HUMAN Fibulin-1 OS=Homo sapiens OX=9606 GN=FBLN1 PE=1 SV=4	8955	20210911_zy_plasma_ethcd_1.4725.4725.3	controllerType=0 controllerNumber=1 scan=4725	21.0796
03170:3	7	R.EEQFN[+2221.788]STFR.V	HexNAc(4)Hex(6)Fuc(1)NeuAc(1)	N[+2222]	1127.1	3	3379.3	3379.31	0	-3.2	172	Specific	215.13	60.2	60.2	3.47	35	>sp|P01859|IGHG2_HUMAN Immunoglobulin heavy constant gamma 2 OS=Homo sapiens OX=9606 GN=IGHG2 PE=1 SV=2	2858	20210911_zy_plasma_ethcd_1.3483.3483.3	controllerType=0 controllerNumber=1 scan=3483	15.5473
04100:3	13	K.IPC[+57.021]SQPPQIEHGTIN[+2350.830]SSR.S	HexNAc(4)Hex(5)Fuc(1)NeuAc(2)	C[+57], N[+2351]	1457.95	3	4371.82	4371.82	0	0.8	868	Specific	215.19	139.33	139.33	3.47	16	>sp|P08603|CFAH_HUMAN Complement factor H OS=Homo sapiens OX=9606 GN=CFH PE=1 SV=4	385	20210911_zy_plasma_ethcd_1.4502.4502.3	controllerType=0 controllerNumber=1 scan=4502	20.108
01951:3	6	K.HYTN[+2278.809]SSQDVTVPC[+57.021]R.V	HexNAc(5)Hex(6)NeuAc(1)	C[+57], N[+2279]	1314.85	3	3942.55	3942.56	0	-2.5	89	Specific	215.91	54.76	54.76	4.28	32	>sp|P01877|IGHA2_HUMAN Immunoglobulin heavy constant alpha 2 OS=Homo sapiens OX=9606 GN=IGHA2 PE=1 SV=4	10403	20210911_zy_plasma_ethcd_1.2148.2148.3	controllerType=0 controllerNumber=1 scan=2148	9.6631
06888:4	1	K.NLFLN[+3226.132]HSEN[+2569.905]ATAK.D	HexNAc(6)Hex(7)NeuAc(3),HexNAc(5)Hex(6)NeuAc(2)	N[+2570][+3226]	1814.19	4	7253.75	7254.77	-1	-2.1	203	Specific	216.16	100.85	15.99	4.69	163	>sp|P00738|HPT_HUMAN Haptoglobin OS=Homo sapiens OX=9606 GN=HP PE=1 SV=1	3044	20210911_zy_plasma_ethcd_1.7554.7554.4	controllerType=0 controllerNumber=1 scan=7554	33.6216
03471:3	47	K.AAIPSALDTN[+1913.677]SSK.S	HexNAc(4)Hex(5)NeuAc(1)	N[+1914]	1063.45	3	3188.33	3188.34	0	-2.3	542	Specific	217.12	92.2	92.2	4.42	5	>sp|Q08380|LG3BP_HUMAN Galectin-3-binding protein OS=Homo sapiens OX=9606 GN=LGALS3BP PE=1 SV=1	4876	20210911_zy_plasma_ethcd_1.3813.3813.4	controllerType=0 controllerNumber=1 scan=3813	17.0299
02976:3	17	K.LGN[+1913.677]WSAM[+15.995]PSC[+57.021]K.A	HexNAc(4)Hex(5)NeuAc(1)	C[+57], M[+16], N[+1914]	1060.75	3	3180.23	3180.24	0	-2.7	251	Specific	217.17	67.4	67.4	3.96	22	>sp|P02749|APOH_HUMAN Beta-2-glycoprotein 1 OS=Homo sapiens OX=9606 GN=APOH PE=1 SV=3	19971	20210911_zy_plasma_ethcd_1.3271.3271.3	controllerType=0 controllerNumber=1 scan=3271	14.61
06443:3	4	K.ELHHLQEQN[+2350.830]VSNAFLDK.G	HexNAc(4)Hex(5)Fuc(1)NeuAc(2)	N[+2351]	1458.28	3	4372.84	4372.83	0	1.1	754	Specific	217.26	122.22	122.22	3.82	22	>sp|P00450|CERU_HUMAN Ceruloplasmin OS=Homo sapiens OX=9606 GN=CP PE=1 SV=1	460	20210911_zy_plasma_ethcd_1.7067.7067.3	controllerType=0 controllerNumber=1 scan=7067	31.4774
01431:2	5	R.EEQYN[+1241.454]STYR.V	HexNAc(3)Hex(3)Fuc(1)	N[+1241]	1215.98	2	2430.96	2430.97	0	-2.2	295	Specific	217.89	86.9	86.9	3.61	45	>sp|P0DOX5|IGG1_HUMAN Immunoglobulin gamma-1 heavy chain OS=Homo sapiens OX=9606 PE=1 SV=2	10252	20210911_zy_plasma_ethcd_1.1580.1580.2	controllerType=0 controllerNumber=1 scan=1580	7.2368
00820:2	24	K.SYN[+1913.677]ETK.I	HexNAc(4)Hex(5)NeuAc(1)	N[+1914]	1328.01	2	2655.01	2655.02	0	-1.4	3222	Specific	217.96	9.26	9.26	0.87	9	>sp|P04114|APOB_HUMAN Apolipoprotein B-100 OS=Homo sapiens OX=9606 GN=APOB PE=1 SV=2	6234	20210911_zy_plasma_ethcd_1.911.911.2	controllerType=0 controllerNumber=1 scan=911	4.2581
05201:4	1	K.NLFLN[+2075.730]HSEN[+3210.137]ATAK.D	HexNAc(4)Hex(6)NeuAc(1),HexNAc(6)Hex(6)Fuc(1)NeuAc(3)	N[+2076][+3210]	1686.65	4	6743.58	6744.6	-1	-2.2	203	Specific	218.08	218.08	6.34	4.82	163	>sp|P00738|HPT_HUMAN Haptoglobin OS=Homo sapiens OX=9606 GN=HP PE=1 SV=1	3044	20210911_zy_plasma_ethcd_1.5708.5708.4	controllerType=0 controllerNumber=1 scan=5708	25.4805
05713:3	3	R.GTAGNALMDGASQLM[+15.995]GEN[+2245.799]R.T	HexNAc(5)Hex(4)NeuAc(2)	M[+16], N[+2246]	1385.55	3	4154.64	4154.65	0	-2.4	377	Specific	218.53	117.15	117.15	4.22	38	>sp|P02675|FIBB_HUMAN Fibrinogen beta chain OS=Homo sapiens OX=9606 GN=FGB PE=1 SV=2	6006	20210911_zy_plasma_ethcd_1.6268.6268.4	controllerType=0 controllerNumber=1 scan=6268	27.9566
12389:3	10	K.C[+57.021]GLVPVLAENYN[+2569.905]K.S	HexNAc(5)Hex(6)NeuAc(2)	C[+57], N[+2570]	1349.22	3	4045.65	4046.66	-1	0.2	421	Specific	218.62	110.67	110.67	3.5	25	>sp|TRFE_HUMAN|(Common contaminant protein)	20484	20210911_zy_plasma_ethcd_1.13588.13588.3	controllerType=0 controllerNumber=1 scan=13588	60.8802
09703:3	2	K.STGKPTLYN[+1702.581]VSLVM[+15.995]SDTAGTC[+57.021]Y.-	HexNAc(2)Hex(8)	C[+57], M[+16], N[+1703]	1361.9	3	4083.67	4083.68	0	-2.3	432	CRagged	218.76	161.12	161.12	4.6	55	>sp|P01871|IGHM_HUMAN Immunoglobulin heavy constant mu OS=Homo sapiens OX=9606 GN=IGHM PE=1 SV=4	10127	20210911_zy_plasma_ethcd_1.10641.10641.3	controllerType=0 controllerNumber=1 scan=10641	47.5639
02789:2	28	K.QSVPAHFVALN[+1540.529]GSK.L	HexNAc(2)Hex(7)	N[+1541]	1498.15	2	2995.3	2995.3	0	-1.3	611	Specific	218.91	164.47	164.47	4.49	6	>sp|P06681|CO2_HUMAN Complement C2 OS=Homo sapiens OX=9606 GN=C2 PE=1 SV=2	8379	20210911_zy_plasma_ethcd_1.3066.3066.3	controllerType=0 controllerNumber=1 scan=3066	13.7119
03044:3	6	K.TPLTAN[+2262.814]ITK.S	HexNAc(5)Hex(5)Fuc(1)NeuAc(1)	N[+2263]	1074.46	3	3221.36	3221.37	0	-2.6	200	Specific	219.66	80.75	80.75	3.96	32	>sp|P01877|IGHA2_HUMAN Immunoglobulin heavy constant alpha 2 OS=Homo sapiens OX=9606 GN=IGHA2 PE=1 SV=4	10403	20210911_zy_plasma_ethcd_1.3345.3345.3	controllerType=0 controllerNumber=1 scan=3345	14.9306
05616:3	95	K.EGHFYYN[+2059.735]ISEVK.V	HexNAc(4)Hex(5)Fuc(1)NeuAc(1)	N[+2060]	1182.48	3	3545.42	3545.44	0	-3.9	58	Specific	219.72	89.13	89.13	2.38	1	>sp|P55058|PLTP_HUMAN Phospholipid transfer protein OS=Homo sapiens OX=9606 GN=PLTP PE=1 SV=1	11930	20210911_zy_plasma_ethcd_1.6162.6162.3	controllerType=0 controllerNumber=1 scan=6162	27.4872
05441:3	13	K.IPC[+57.021]SQPPQIEHGTIN[+2861.000]SSR.S	HexNAc(5)Hex(6)NeuAc(3)	C[+57], N[+2861]	1627.99	3	4881.97	4881.99	0	-4.4	868	Specific	219.8	129.66	129.66	4.28	16	>sp|P08603|CFAH_HUMAN Complement factor H OS=Homo sapiens OX=9606 GN=CFH PE=1 SV=4	385	20210911_zy_plasma_ethcd_1.5970.5970.3	controllerType=0 controllerNumber=1 scan=5970	26.6354
01936:4	11	R.N[+1864.634]GTGHGN[+3229.168]STHHGPEYMR.C	HexNAc(2)Hex(9),HexNAc(8)Hex(9)Fuc(1)	N[+1865][+3229]	1737.39	4	6946.56	6945.6	1	-6.1	240	Specific	219.89	94.58	0	4.72	28	>sp|P02790|HEMO_HUMAN Hemopexin OS=Homo sapiens OX=9606 GN=HPX PE=1 SV=2	9336	20210911_zy_plasma_ethcd_1.2131.2131.4	controllerType=0 controllerNumber=1 scan=2131	9.5908
00982:3	5	K.TKPREEQYN[+1663.608]STYR.V	HexNAc(5)Hex(4)	N[+1664]	1112.47	3	3335.41	3335.42	0	-2.6	291	Specific	219.95	107.45	107.45	4.21	45	>sp|P0DOX5|IGG1_HUMAN Immunoglobulin gamma-1 heavy chain OS=Homo sapiens OX=9606 PE=1 SV=2	10252	20210911_zy_plasma_ethcd_1.1088.1088.3	controllerType=0 controllerNumber=1 scan=1088	5.0479
09712:3	10	K.C[+57.021]GLVPVLAENYN[+2059.735]K.S	HexNAc(4)Hex(5)Fuc(1)NeuAc(1)	C[+57], N[+2060]	1179.49	3	3536.47	3536.49	0	-5.5	421	Specific	220.12	68.34	68.34	5.91	25	>sp|TRFE_HUMAN|(Common contaminant protein)	20484	20210911_zy_plasma_ethcd_1.10651.10651.3	controllerType=0 controllerNumber=1 scan=10651	47.6088
05847:4	1	K.NLFLN[+2805.994]HSEN[+2026.687]ATAK.D	HexNAc(6)Hex(8)NeuAc(1),HexNAc(2)Hex(10)	N[+2027][+2806]	1573.35	4	6290.39	6291.41	-1	-3.6	203	Specific	220.2	126.78	4	6.25	163	>sp|P00738|HPT_HUMAN Haptoglobin OS=Homo sapiens OX=9606 GN=HP PE=1 SV=1	3044	20210911_zy_plasma_ethcd_1.6415.6415.4	controllerType=0 controllerNumber=1 scan=6415	28.6015
05032:4	1	K.NLFLN[+3226.132]HSEN[+1913.677]ATAK.D	HexNAc(6)Hex(7)NeuAc(3),HexNAc(4)Hex(5)NeuAc(1)	N[+1914][+3226]	1650.39	4	6598.53	6598.54	0	-1.2	203	Specific	220.35	220.35	15.27	5.97	163	>sp|P00738|HPT_HUMAN Haptoglobin OS=Homo sapiens OX=9606 GN=HP PE=1 SV=1	3044	20210911_zy_plasma_ethcd_1.5523.5523.4	controllerType=0 controllerNumber=1 scan=5523	24.6545
09153:4	1	K.NLFLN[+3007.058]HSEN[+2861.000]ATAK.D	HexNAc(5)Hex(6)Fuc(1)NeuAc(3),HexNAc(5)Hex(6)NeuAc(3)	N[+2861][+3007]	1832.2	4	7325.78	7326.79	-1	-1.6	203	Specific	221	100.5	0	6.14	163	>sp|P00738|HPT_HUMAN Haptoglobin OS=Homo sapiens OX=9606 GN=HP PE=1 SV=1	3044	20210911_zy_plasma_ethcd_1.10038.10038.4	controllerType=0 controllerNumber=1 scan=10038	44.8265
07814:3	25	K.NN[+2861.000]ATVHEQVGGPSLTSDLQAQSK.G	HexNAc(5)Hex(6)NeuAc(3)	N[+2861]	1747.72	3	5241.14	5242.17	-1	-5.5	85	Specific	221.24	87.92	87.92	6.45	10	>sp|P04004|VTNC_HUMAN Vitronectin OS=Homo sapiens OX=9606 GN=VTN PE=1 SV=1	17960	20210911_zy_plasma_ethcd_1.8567.8567.3	controllerType=0 controllerNumber=1 scan=8567	38.1013
06809:3	2	K.STGKPTLYN[+1581.555]VSLVM[+15.995]SDTAGTC[+57.021]Y.-	HexNAc(3)Hex(6)	C[+57], M[+16], N[+1582]	1321.55	3	3962.65	3962.66	0	-2.3	432	CRagged	221.33	157.55	157.55	6.2	55	>sp|P01871|IGHM_HUMAN Immunoglobulin heavy constant mu OS=Homo sapiens OX=9606 GN=IGHM PE=1 SV=4	10127	20210911_zy_plasma_ethcd_1.7468.7468.3	controllerType=0 controllerNumber=1 scan=7468	33.2479
06787:3	2	K.STGKPTLYN[+1419.502]VSLVM[+15.995]SDTAGTC[+57.021]Y.-	HexNAc(3)Hex(5)	C[+57], M[+16], N[+1420]	1267.54	3	3800.6	3800.6	0	-1.8	432	CRagged	221.47	156.17	156.17	5.92	55	>sp|P01871|IGHM_HUMAN Immunoglobulin heavy constant mu OS=Homo sapiens OX=9606 GN=IGHM PE=1 SV=4	10127	20210911_zy_plasma_ethcd_1.7444.7444.3	controllerType=0 controllerNumber=1 scan=7444	33.1391
14937:3	32	K.YLGN[+1913.677]ATAIFFLPDEGK.L	HexNAc(4)Hex(5)NeuAc(1)	N[+1914]	1223.86	3	3669.56	3669.57	0	-2.2	268	Specific	221.54	107.31	107.31	6.07	3	>sp|P01009|A1AT_HUMAN Alpha-1-antitrypsin OS=Homo sapiens OX=9606 GN=SERPINA1 PE=1 SV=3	20395	20210911_zy_plasma_ethcd_1.16376.16376.3	controllerType=0 controllerNumber=1 scan=16376	73.2291
14228:3	1	K.VVLHPN[+2861.000]YSQVDIGLIK.L	HexNAc(5)Hex(6)NeuAc(3)	N[+2861]	1552.34	3	4655	4656.01	-1	-2.3	236	Specific	221.61	123.37	123.37	6.57	163	>sp|P00738|HPT_HUMAN Haptoglobin OS=Homo sapiens OX=9606 GN=HP PE=1 SV=1	3044	20210911_zy_plasma_ethcd_1.15600.15600.3	controllerType=0 controllerNumber=1 scan=15600	69.7814
07757:3	25	K.NN[+3007.058]ATVHEQVGGPSLTSDLQAQSK.G	HexNAc(5)Hex(6)Fuc(1)NeuAc(3)	N[+3007]	1796.41	3	5387.22	5388.23	-1	-0.8	85	Specific	221.69	104.11	104.11	5.9	10	>sp|P04004|VTNC_HUMAN Vitronectin OS=Homo sapiens OX=9606 GN=VTN PE=1 SV=1	17960	20210911_zy_plasma_ethcd_1.8505.8505.3	controllerType=0 controllerNumber=1 scan=8505	37.8314
12271:3	29	R.IIVPLNNREN[+2204.772]ISDPTSPLR.T	HexNAc(4)Hex(5)NeuAc(2)	N[+2205]	1451.65	3	4352.95	4352.95	0	-1	62	Specific	222.19	146.58	146.58	5.49	13	>sp|P01591|IGJ_HUMAN Immunoglobulin J chain OS=Homo sapiens OX=9606 GN=JCHAIN PE=1 SV=4	4401	20210911_zy_plasma_ethcd_1.13459.13459.3	controllerType=0 controllerNumber=1 scan=13459	60.3074
01440:2	5	R.EEQYN[+1606.587]STYR.V	HexNAc(4)Hex(4)Fuc(1)	N[+1607]	1398.55	2	2796.09	2796.1	0	-2.4	295	Specific	222.38	107.62	107.62	5.74	45	>sp|P0DOX5|IGG1_HUMAN Immunoglobulin gamma-1 heavy chain OS=Homo sapiens OX=9606 PE=1 SV=2	10252	20210911_zy_plasma_ethcd_1.1590.1590.4	controllerType=0 controllerNumber=1 scan=1590	7.2748
01114:2	2	K.N[+1241.454]NSDISSTR.G	HexNAc(3)Hex(3)Fuc(1)	N[+1241]	1117.96	2	2234.91	2234.91	0	-3.3	46	Specific	222.48	114.72	114.72	5.53	55	>sp|P01871|IGHM_HUMAN Immunoglobulin heavy constant mu OS=Homo sapiens OX=9606 GN=IGHM PE=1 SV=4	10127	20210911_zy_plasma_ethcd_1.1233.1233.2	controllerType=0 controllerNumber=1 scan=1233	5.7021
00799:3	42	K.N[+2204.772]C[+57.021]TSR.L	HexNAc(4)Hex(5)NeuAc(2)	C[+57], N[+2205]	948.018	3	2842.04	2842.04	0	-2.3	170	Specific	222.67	24.14	24.14	3.81	2	>sp|P01019|ANGT_HUMAN Angiotensinogen OS=Homo sapiens OX=9606 GN=AGT PE=1 SV=1	20146	20210911_zy_plasma_ethcd_1.888.888.3	controllerType=0 controllerNumber=1 scan=888	4.1532
10970:4	15	R.HGIQYFNN[+2204.772]NTQHSSLFM[+15.995]LNEVK.R	HexNAc(4)Hex(5)NeuAc(2)	M[+16], N[+2205]	1211	4	4841	4842.02	-1	-5	162	Specific	222.84	148.76	148.76	6.05	23	>sp|P01042|KNG1_HUMAN Kininogen-1 OS=Homo sapiens OX=9606 GN=KNG1 PE=1 SV=2	6533	20210911_zy_plasma_ethcd_1.12031.12031.4	controllerType=0 controllerNumber=1 scan=12031	53.8315
12336:3	3	R.GTAGNALMDGASQLMGEN[+1913.677]R.T	HexNAc(4)Hex(5)NeuAc(1)	N[+1914]	1269.51	3	3806.53	3806.54	0	-1.7	377	Specific	222.93	120.87	59.43	6.04	38	>sp|P02675|FIBB_HUMAN Fibrinogen beta chain OS=Homo sapiens OX=9606 GN=FGB PE=1 SV=2	6006	20210911_zy_plasma_ethcd_1.13530.13530.3	controllerType=0 controllerNumber=1 scan=13530	60.6234
05244:3	19	R.YPHKPEIN[+2204.772]STTHPGADLQENFC[+57.021]R.N	HexNAc(4)Hex(5)NeuAc(2)	C[+57], N[+2205]	1639.35	3	4916.02	4916.04	0	-2.8	136	Specific	223.03	128.89	128.89	6.49	7	>sp|P00734|THRB_HUMAN Prothrombin OS=Homo sapiens OX=9606 GN=F2 PE=1 SV=2	18404	20210911_zy_plasma_ethcd_1.5755.5755.3	controllerType=0 controllerNumber=1 scan=5755	25.6908
04804:3	4	K.ELHHLQEQN[+1913.677]VSNAFLDK.G	HexNAc(4)Hex(5)NeuAc(1)	N[+1914]	1312.57	3	3935.68	3935.68	0	0.1	754	Specific	223.25	97.52	97.52	5.43	22	>sp|P00450|CERU_HUMAN Ceruloplasmin OS=Homo sapiens OX=9606 GN=CP PE=1 SV=1	460	20210911_zy_plasma_ethcd_1.5273.5273.3	controllerType=0 controllerNumber=1 scan=5273	23.5327
00856:3	5	K.TKPREEQYN[+1444.534]STYR.V	HexNAc(4)Hex(3)Fuc(1)	N[+1445]	1039.45	3	3116.34	3116.34	0	-0.3	291	Specific	223.41	72.13	72.13	5.02	45	>sp|P0DOX5|IGG1_HUMAN Immunoglobulin gamma-1 heavy chain OS=Homo sapiens OX=9606 PE=1 SV=2	10252	20210911_zy_plasma_ethcd_1.950.950.3	controllerType=0 controllerNumber=1 scan=950	4.4366
13211:3	1	K.VVLHPN[+3081.095]YSQVDIGLIK.L	HexNAc(6)Hex(7)Fuc(1)NeuAc(2)	N[+3081]	1626.03	3	4876.08	4876.11	0	-5.8	236	Specific	223.64	60.17	60.17	5.79	163	>sp|P00738|HPT_HUMAN Haptoglobin OS=Homo sapiens OX=9606 GN=HP PE=1 SV=1	3044	20210911_zy_plasma_ethcd_1.14487.14487.3	controllerType=0 controllerNumber=1 scan=14487	64.8589
08119:4	4	K.ELHHLQEQN[+2861.000]VSNAFLDK.G	HexNAc(5)Hex(6)NeuAc(3)	N[+2861]	1221.76	4	4884	4883	1	-1.1	754	Specific	224.12	177.85	177.85	5.61	22	>sp|P00450|CERU_HUMAN Ceruloplasmin OS=Homo sapiens OX=9606 GN=CP PE=1 SV=1	460	20210911_zy_plasma_ethcd_1.8901.8901.4	controllerType=0 controllerNumber=1 scan=8901	39.5933
05063:4	1	K.NLFLN[+3517.228]HSEN[+1987.714]ATAK.D	HexNAc(6)Hex(7)NeuAc(4),HexNAc(5)Hex(6)	N[+1988][+3517]	1741.42	4	6962.68	6963.68	-1	0.7	203	Specific	224.7	100.68	0	5.15	163	>sp|P00738|HPT_HUMAN Haptoglobin OS=Homo sapiens OX=9606 GN=HP PE=1 SV=1	3044	20210911_zy_plasma_ethcd_1.5557.5557.4	controllerType=0 controllerNumber=1 scan=5557	24.8037
10096:3	18	R.QNQC[+57.021]FYN[+2569.905]SSYLNVQR.E	HexNAc(5)Hex(6)NeuAc(2)	C[+57], N[+2570]	1497.59	3	4490.76	4490.77	0	-1.6	87	Specific	224.95	100.5	100.5	5.82	17	>sp|P19652|A1AG2_HUMAN Alpha-1-acid glycoprotein 2 OS=Homo sapiens OX=9606 GN=ORM2 PE=1 SV=2	4531	20210911_zy_plasma_ethcd_1.11073.11073.3	controllerType=0 controllerNumber=1 scan=11073	49.5288
02057:3	7	K.PREEQFN[+1647.613]STFR.V	HexNAc(5)Hex(3)Fuc(1)	N[+1648]	1020.1	3	3058.28	3058.29	0	-3.5	170	Specific	225.03	155.2	155.2	5.32	35	>sp|P01859|IGHG2_HUMAN Immunoglobulin heavy constant gamma 2 OS=Homo sapiens OX=9606 GN=IGHG2 PE=1 SV=2	2858	20210911_zy_plasma_ethcd_1.2264.2264.3	controllerType=0 controllerNumber=1 scan=2264	10.1531
10954:3	23	R.LAN[+2350.830]LTQGEDQYYLR.V	HexNAc(4)Hex(5)Fuc(1)NeuAc(2)	N[+2351]	1345.56	3	4034.66	4034.66	0	-1.7	372	Specific	225.04	104.47	104.47	6.07	17	>sp|P10909|CLUS_HUMAN Clusterin OS=Homo sapiens OX=9606 GN=CLU PE=1 SV=1	6125	20210911_zy_plasma_ethcd_1.12013.12013.3	controllerType=0 controllerNumber=1 scan=12013	53.7554
06487:3	4	K.ELHHLQEQN[+2204.772]VSNAFLDK.G	HexNAc(4)Hex(5)NeuAc(2)	N[+2205]	1409.93	3	4227.78	4226.78	1	1	754	Specific	225.99	110.05	110.05	5.36	22	>sp|P00450|CERU_HUMAN Ceruloplasmin OS=Homo sapiens OX=9606 GN=CP PE=1 SV=1	460	20210911_zy_plasma_ethcd_1.7115.7115.3	controllerType=0 controllerNumber=1 scan=7115	31.6908
00891:3	2	K.N[+1971.719]NSDISSTR.G	HexNAc(5)Hex(5)Fuc(1)	N[+1972]	989.062	3	2965.17	2965.18	0	-2.7	46	Specific	226.27	96.88	96.88	5.64	55	>sp|P01871|IGHM_HUMAN Immunoglobulin heavy constant mu OS=Homo sapiens OX=9606 GN=IGHM PE=1 SV=4	10127	20210911_zy_plasma_ethcd_1.989.989.3	controllerType=0 controllerNumber=1 scan=989	4.6122
01202:3	5	K.PREEQYN[+1606.587]STYR.V	HexNAc(4)Hex(4)Fuc(1)	N[+1607]	1017.09	3	3049.24	3049.25	0	-2.6	293	Specific	226.42	58.91	58.91	4.99	45	>sp|P0DOX5|IGG1_HUMAN Immunoglobulin gamma-1 heavy chain OS=Homo sapiens OX=9606 PE=1 SV=2	10252	20210911_zy_plasma_ethcd_1.1329.1329.3	controllerType=0 controllerNumber=1 scan=1329	6.1237
03188:3	63	R.LQNNENN[+2204.772]ISC[+57.021]VER.G	HexNAc(4)Hex(5)NeuAc(2)	C[+57], N[+2205]	1265.5	3	3794.5	3794.51	0	-1.9	120	Specific	226.86	55.58	55.58	5.9	1	>sp|P36980|FHR2_HUMAN Complement factor H-related protein 2 OS=Homo sapiens OX=9606 GN=CFHR2 PE=1 SV=1	5715	20210911_zy_plasma_ethcd_1.3503.3503.3	controllerType=0 controllerNumber=1 scan=3503	15.6387
11732:3	33	R.ADGTVNQIEGEATPVN[+2350.830]LTEPAK.L	HexNAc(4)Hex(5)Fuc(1)NeuAc(2)	N[+2351]	1535.32	3	4603.94	4604.95	-1	-1	83	Specific	226.94	133.69	133.69	5.97	5	>sp|P05090|APOD_HUMAN Apolipoprotein D OS=Homo sapiens OX=9606 GN=APOD PE=1 SV=1	120	20210911_zy_plasma_ethcd_1.12867.12867.3	controllerType=0 controllerNumber=1 scan=12867	57.6134
08793:3	34	K.DIVEYYNDSN[+2350.830]GSHVLQGR.F	HexNAc(4)Hex(5)Fuc(1)NeuAc(2)	N[+2351]	1472.6	3	4415.78	4416.79	-1	-0.3	103	Specific	227.23	144.26	71.58	5.81	4	>sp|P25311|ZA2G_HUMAN Zinc-alpha-2-glycoprotein OS=Homo sapiens OX=9606 GN=AZGP1 PE=1 SV=2	18783	20210911_zy_plasma_ethcd_1.9642.9642.3	controllerType=0 controllerNumber=1 scan=9642	42.9697
02244:3	16	R.EEQFN[+2262.814]STYR.V	HexNAc(5)Hex(5)Fuc(1)NeuAc(1)	N[+2263]	1146.11	3	3436.32	3436.33	0	-2.6	173	Specific	227.5	59.48	59.48	5.47	25	>sp|P01861|IGHG4_HUMAN Immunoglobulin heavy constant gamma 4 OS=Homo sapiens OX=9606 GN=IGHG4 PE=1 SV=1	12793	20210911_zy_plasma_ethcd_1.2469.2469.3	controllerType=0 controllerNumber=1 scan=2469	11.0715
01705:3	23	K.KKEDALN[+2861.000]ETR.E	HexNAc(5)Hex(6)NeuAc(3)	N[+2861]	1355.55	3	4064.64	4064.63	0	0.8	80	Specific	227.51	95.69	95.69	4.58	17	>sp|P10909|CLUS_HUMAN Clusterin OS=Homo sapiens OX=9606 GN=CLU PE=1 SV=1	6125	20210911_zy_plasma_ethcd_1.1880.1880.3	controllerType=0 controllerNumber=1 scan=1880	8.5354
09629:3	17	K.LGN[+3007.058]WSAMPSC[+57.021]K.A	HexNAc(5)Hex(6)Fuc(1)NeuAc(3)	C[+57], N[+3007]	1419.88	3	4257.62	4257.62	0	-1.8	251	Specific	227.92	87.11	87.11	5.63	22	>sp|P02749|APOH_HUMAN Beta-2-glycoprotein 1 OS=Homo sapiens OX=9606 GN=APOH PE=1 SV=3	19971	20210911_zy_plasma_ethcd_1.10560.10560.3	controllerType=0 controllerNumber=1 scan=10560	47.1923
04929:4	1	K.NLFLN[+3226.132]HSEN[+2278.809]ATAK.D	HexNAc(6)Hex(7)NeuAc(3),HexNAc(5)Hex(6)NeuAc(1)	N[+2279][+3226]	1741.42	4	6962.66	6963.68	-1	-1.8	203	Specific	228.08	123.02	0	6.53	163	>sp|P00738|HPT_HUMAN Haptoglobin OS=Homo sapiens OX=9606 GN=HP PE=1 SV=1	3044	20210911_zy_plasma_ethcd_1.5410.5410.4	controllerType=0 controllerNumber=1 scan=5410	24.1448
08862:3	50	R.LAGKPTHVN[+2350.830]VSVVM[+15.995]AEVDGTC[+57.021].Y	HexNAc(4)Hex(5)Fuc(1)NeuAc(2)	C[+57], M[+16], N[+2351]	1517.64	3	4550.9	4550.9	0	-1.1	332	CRagged	228.17	126.39	126.39	6.17	6	>sp|P01876|IGHA1_HUMAN Immunoglobulin heavy constant alpha 1 OS=Homo sapiens OX=9606 GN=IGHA1 PE=1 SV=2	9091	20210911_zy_plasma_ethcd_1.9718.9718.3	controllerType=0 controllerNumber=1 scan=9718	43.3271
02830:3	100	K.AAVVN[+2350.830]GSTGPLQLPVTR.K	HexNAc(4)Hex(5)Fuc(1)NeuAc(2)	N[+2351]	1344.26	3	4030.76	4030.77	0	-2.3	202	Specific	228.23	19.21	19.21	2.15	1	>sp|Q9Y2E6|DTX4_HUMAN E3 ubiquitin-protein ligase DTX4 OS=Homo sapiens OX=9606 GN=DTX4 PE=1 SV=2	4276	20210911_zy_plasma_ethcd_1.3111.3111.3	controllerType=0 controllerNumber=1 scan=3111	13.911
07017:4	1	K.NLFLN[+2861.000]HSEN[+2935.037]ATAK.D	HexNAc(5)Hex(6)NeuAc(3),HexNAc(6)Hex(7)NeuAc(2)	N[+2861][+2935]	1814.19	4	7253.76	7254.77	-1	-1.6	203	Specific	228.33	114.92	0	6.17	163	>sp|P00738|HPT_HUMAN Haptoglobin OS=Homo sapiens OX=9606 GN=HP PE=1 SV=1	3044	20210911_zy_plasma_ethcd_1.7695.7695.4	controllerType=0 controllerNumber=1 scan=7695	34.2383
04880:3	1	K.NLFLN[+3007.058]HSENATAK.D	HexNAc(5)Hex(6)Fuc(1)NeuAc(3)	N[+3007]	1488.93	3	4464.78	4465.79	-1	-1.4	203	Specific	228.34	87.07	77.01	6.21	163	>sp|P00738|HPT_HUMAN Haptoglobin OS=Homo sapiens OX=9606 GN=HP PE=1 SV=1	3044	20210911_zy_plasma_ethcd_1.5356.5356.3	controllerType=0 controllerNumber=1 scan=5356	23.9052
10106:3	24	K.YDFN[+1913.677]SSMLYSTAK.G	HexNAc(4)Hex(5)NeuAc(1)	N[+1914]	1147.46	3	3440.35	3440.36	0	-2.5	3462	Specific	228.65	95.09	95.09	6.09	9	>sp|P04114|APOB_HUMAN Apolipoprotein B-100 OS=Homo sapiens OX=9606 GN=APOB PE=1 SV=2	6234	20210911_zy_plasma_ethcd_1.11084.11084.3	controllerType=0 controllerNumber=1 scan=11084	49.5789
04127:4	1	K.NLFLN[+2407.852]HSEN[+1710.598]ATAK.D	HexNAc(5)Hex(5)NeuAc(2),HexNAc(3)Hex(5)NeuAc(1)	N[+1711][+2408]	1395.05	4	5577.18	5577.18	0	-1.1	203	Specific	228.72	228.72	11.01	5.8	163	>sp|P00738|HPT_HUMAN Haptoglobin OS=Homo sapiens OX=9606 GN=HP PE=1 SV=1	3044	20210911_zy_plasma_ethcd_1.4532.4532.4	controllerType=0 controllerNumber=1 scan=4532	20.2394
01448:2	5	R.EEQYN[+1444.534]STYR.V	HexNAc(4)Hex(3)Fuc(1)	N[+1445]	1317.52	2	2634.04	2634.05	0	-2.4	295	Specific	229.08	124.49	124.49	5.87	45	>sp|P0DOX5|IGG1_HUMAN Immunoglobulin gamma-1 heavy chain OS=Homo sapiens OX=9606 PE=1 SV=2	10252	20210911_zy_plasma_ethcd_1.1599.1599.4	controllerType=0 controllerNumber=1 scan=1599	7.3051
00913:3	16	K.TKPREEQFN[+1095.397]STYR.V	HexNAc(3)Hex(3)	N[+1095]	917.739	3	2751.2	2751.21	0	-2.4	169	Specific	229.85	67.33	67.33	5.79	25	>sp|P01861|IGHG4_HUMAN Immunoglobulin heavy constant gamma 4 OS=Homo sapiens OX=9606 GN=IGHG4 PE=1 SV=1	12793	20210911_zy_plasma_ethcd_1.1013.1013.3	controllerType=0 controllerNumber=1 scan=1013	4.7194
02899:3	12	R.EN[+3517.228]GTISR.Y	HexNAc(6)Hex(7)NeuAc(4)	N[+3517]	1431.88	3	4293.62	4293.62	0	0.2	102	Specific	229.98	29.55	29.55	2.5	28	>sp|P02763|A1AG1_HUMAN Alpha-1-acid glycoprotein 1 OS=Homo sapiens OX=9606 GN=ORM1 PE=1 SV=1	2208	20210911_zy_plasma_ethcd_1.3187.3187.3	controllerType=0 controllerNumber=1 scan=3187	14.2498
04245:3	54	R.GVNFN[+2204.772]VSK.V	HexNAc(4)Hex(5)NeuAc(2)	N[+2205]	1023.75	3	3069.22	3069.23	0	-2.1	123	Specific	230.43	102.2	102.2	3.97	7	>sp|P03952|KLKB1_HUMAN Plasma kallikrein OS=Homo sapiens OX=9606 GN=KLKB1 PE=1 SV=1	11889	20210911_zy_plasma_ethcd_1.4661.4661.3	controllerType=0 controllerNumber=1 scan=4661	20.7998
02863:3	17	R.VYKPSAGN[+2715.963]NSLYR.D	HexNAc(5)Hex(6)Fuc(1)NeuAc(2)	N[+2716]	1395.57	3	4184.71	4184.72	0	-1.9	155	Specific	230.57	81	81	6.13	22	>sp|P02749|APOH_HUMAN Beta-2-glycoprotein 1 OS=Homo sapiens OX=9606 GN=APOH PE=1 SV=3	19971	20210911_zy_plasma_ethcd_1.3147.3147.3	controllerType=0 controllerNumber=1 scan=3147	14.0711
03173:3	23	K.EDALN[+2861.000]ETR.E	HexNAc(5)Hex(6)NeuAc(3)	N[+2861]	1270.15	3	3808.44	3808.44	0	-0.5	82	Specific	230.58	61.6	61.6	3.55	17	>sp|P10909|CLUS_HUMAN Clusterin OS=Homo sapiens OX=9606 GN=CLU PE=1 SV=1	6125	20210911_zy_plasma_ethcd_1.3486.3486.3	controllerType=0 controllerNumber=1 scan=3486	15.5631
10731:3	2	R.GLTFQQN[+2262.814]ASSMC[+57.021]VPDQDTAIR.V	HexNAc(5)Hex(5)Fuc(1)NeuAc(1)	C[+57], N[+2263]	1534.3	3	4600.88	4601.89	-1	-2.1	203	Specific	230.74	137.57	39.31	7.12	55	>sp|P01871|IGHM_HUMAN Immunoglobulin heavy constant mu OS=Homo sapiens OX=9606 GN=IGHM PE=1 SV=4	10127	20210911_zy_plasma_ethcd_1.11769.11769.3	controllerType=0 controllerNumber=1 scan=11769	52.6547
08372:3	3	R.GTAGNALM[+15.995]DGASQLMGEN[+1913.677]R.T	HexNAc(4)Hex(5)NeuAc(1)	M[+16], N[+1914]	1274.85	3	3822.52	3822.53	0	-2.6	377	Specific	230.88	97.19	97.19	6.25	38	>sp|P02675|FIBB_HUMAN Fibrinogen beta chain OS=Homo sapiens OX=9606 GN=FGB PE=1 SV=2	6006	20210911_zy_plasma_ethcd_1.9179.9179.3	controllerType=0 controllerNumber=1 scan=9179	40.8466
05610:3	65	R.C[+57.021]FLGN[+2204.772]GTGYR.G	HexNAc(4)Hex(5)NeuAc(2)	C[+57], N[+2205]	1117.1	3	3349.29	3349.29	0	-2.2	286	Specific	230.98	94.67	94.67	5.63	1	>sp|Q04756|HGFA_HUMAN Hepatocyte growth factor activator OS=Homo sapiens OX=9606 GN=HGFAC PE=1 SV=1	4501	20210911_zy_plasma_ethcd_1.6155.6155.3	controllerType=0 controllerNumber=1 scan=6155	27.4574
02998:3	12	R.EN[+3517.228]GTISR.Y	HexNAc(6)Hex(7)NeuAc(4)	N[+3517]	1431.87	3	4293.61	4293.62	0	-2.6	102	Specific	231.05	30.39	30.39	3.81	28	>sp|P02763|A1AG1_HUMAN Alpha-1-acid glycoprotein 1 OS=Homo sapiens OX=9606 GN=ORM1 PE=1 SV=1	2208	20210911_zy_plasma_ethcd_1.3295.3295.3	controllerType=0 controllerNumber=1 scan=3295	14.7137
12208:3	1	K.VVLHPN[+2204.772]YSQVDIGLIK.L	HexNAc(4)Hex(5)NeuAc(2)	N[+2205]	1333.93	3	3999.78	3999.78	0	-1.6	236	Specific	231.77	110.99	110.99	5.91	163	>sp|P00738|HPT_HUMAN Haptoglobin OS=Homo sapiens OX=9606 GN=HP PE=1 SV=1	3044	20210911_zy_plasma_ethcd_1.13390.13390.3	controllerType=0 controllerNumber=1 scan=13390	59.9941
07710:3	72	K.GELN[+1913.677]TSIFSSRPIDK.F	HexNAc(4)Hex(5)NeuAc(1)	N[+1914]	1193.18	3	3577.53	3577.54	0	-4	350	Specific	231.95	67.56	67.56	3.35	1	>sp|Q9UHG3|PCYOX_HUMAN Prenylcysteine oxidase 1 OS=Homo sapiens OX=9606 GN=PCYOX1 PE=1 SV=3	9384	20210911_zy_plasma_ethcd_1.8453.8453.3	controllerType=0 controllerNumber=1 scan=8453	37.601
05908:3	13	K.SPDVIN[+2204.772]GSPISQK.I	HexNAc(4)Hex(5)NeuAc(2)	N[+2205]	1182.83	3	3546.47	3546.47	0	-1.9	212	Specific	232.09	77.24	77.24	6.07	16	>sp|P08603|CFAH_HUMAN Complement factor H OS=Homo sapiens OX=9606 GN=CFH PE=1 SV=4	385	20210911_zy_plasma_ethcd_1.6482.6482.3	controllerType=0 controllerNumber=1 scan=6482	28.9009
06249:3	4	K.ELHHLQEQN[+2569.905]VSNAFLDK.G	HexNAc(5)Hex(6)NeuAc(2)	N[+2570]	1531.31	3	4591.91	4591.91	0	1.3	754	Specific	232.1	130.85	130.85	5.45	22	>sp|P00450|CERU_HUMAN Ceruloplasmin OS=Homo sapiens OX=9606 GN=CP PE=1 SV=1	460	20210911_zy_plasma_ethcd_1.6855.6855.3	controllerType=0 controllerNumber=1 scan=6855	30.5416
01853:3	5	R.EEQYN[+2262.814]STYR.V	HexNAc(5)Hex(5)Fuc(1)NeuAc(1)	N[+2263]	1151.44	3	3452.32	3452.33	0	-2.9	295	Specific	232.7	52.26	52.26	5.26	45	>sp|P0DOX5|IGG1_HUMAN Immunoglobulin gamma-1 heavy chain OS=Homo sapiens OX=9606 PE=1 SV=2	10252	20210911_zy_plasma_ethcd_1.2041.2041.3	controllerType=0 controllerNumber=1 scan=2041	9.212
13507:3	1	K.VVLHPN[+2204.772]YSQVDIGLIK.L	HexNAc(4)Hex(5)NeuAc(2)	N[+2205]	1333.93	3	3999.77	3999.78	0	-2.7	236	Specific	233.11	112.84	112.84	6.16	163	>sp|P00738|HPT_HUMAN Haptoglobin OS=Homo sapiens OX=9606 GN=HP PE=1 SV=1	3044	20210911_zy_plasma_ethcd_1.14811.14811.3	controllerType=0 controllerNumber=1 scan=14811	66.2902
08557:3	3	R.GTAGNALM[+15.995]DGASQLMGEN[+1913.677]R.T	HexNAc(4)Hex(5)NeuAc(1)	M[+16], N[+1914]	1274.84	3	3822.52	3822.53	0	-3.2	377	Specific	233.39	99.57	99.57	6.04	38	>sp|P02675|FIBB_HUMAN Fibrinogen beta chain OS=Homo sapiens OX=9606 GN=FGB PE=1 SV=2	6006	20210911_zy_plasma_ethcd_1.9382.9382.3	controllerType=0 controllerNumber=1 scan=9382	41.766
12498:3	83	K.GVPQPN[+2569.905]ITWLKR.G	HexNAc(5)Hex(6)NeuAc(2)	N[+2570]	1326.91	3	3978.71	3978.71	0	-0.2	1325	Specific	233.41	57.42	57.42	2.65	5	>sp|P82987|ATL3_HUMAN ADAMTS-like protein 3 OS=Homo sapiens OX=9606 GN=ADAMTSL3 PE=1 SV=4	20246	20210911_zy_plasma_ethcd_1.13707.13707.4	controllerType=0 controllerNumber=1 scan=13707	61.4075
01072:3	2	K.YKN[+2221.788]NSDISSTR.G	HexNAc(4)Hex(6)Fuc(1)NeuAc(1)	N[+2222]	1169.47	3	3506.4	3506.41	0	-2.8	44	Specific	233.46	55.88	55.88	5.4	55	>sp|P01871|IGHM_HUMAN Immunoglobulin heavy constant mu OS=Homo sapiens OX=9606 GN=IGHM PE=1 SV=4	10127	20210911_zy_plasma_ethcd_1.1187.1187.3	controllerType=0 controllerNumber=1 scan=1187	5.4967
07494:4	1	K.NLFLN[+1946.687]HSEN[+3147.115]ATAK.D	HexNAc(4)Hex(7),HexNAc(6)Hex(11)Fuc(1)	N[+1947][+3147]	1638.88	4	6552.5	6552.54	0	-5	203	Specific	234.1	114.37	7.14	5.51	163	>sp|P00738|HPT_HUMAN Haptoglobin OS=Homo sapiens OX=9606 GN=HP PE=1 SV=1	3044	20210911_zy_plasma_ethcd_1.8217.8217.4	controllerType=0 controllerNumber=1 scan=8217	36.5425
10136:3	18	R.QNQC[+57.021]FYN[+2204.772]SSYLNVQR.E	HexNAc(4)Hex(5)NeuAc(2)	C[+57], N[+2205]	1375.88	3	4125.64	4125.64	0	-0.6	87	Specific	234.28	93.2	93.2	5.32	17	>sp|P19652|A1AG2_HUMAN Alpha-1-acid glycoprotein 2 OS=Homo sapiens OX=9606 GN=ORM2 PE=1 SV=2	4531	20210911_zy_plasma_ethcd_1.11117.11117.3	controllerType=0 controllerNumber=1 scan=11117	49.7325
01769:3	7	K.TKPREEQFN[+1971.719]STFR.V	HexNAc(5)Hex(5)Fuc(1)	N[+1972]	1204.51	3	3611.52	3611.54	0	-5.3	168	Specific	235.34	105.25	105.25	6	35	>sp|P01859|IGHG2_HUMAN Immunoglobulin heavy constant gamma 2 OS=Homo sapiens OX=9606 GN=IGHG2 PE=1 SV=2	2858	20210911_zy_plasma_ethcd_1.1950.1950.3	controllerType=0 controllerNumber=1 scan=1950	8.8351
02624:3	51	R.SHEIWTHSC[+57.021]PQSPGN[+2204.772]GTDASH.-	HexNAc(4)Hex(5)NeuAc(2)	C[+57], N[+2205]	1503.92	3	4509.73	4509.74	0	-1.7	382	CRagged	236.06	125.1	125.1	7.14	1	>sp|P04278|SHBG_HUMAN Sex hormone-binding globulin OS=Homo sapiens OX=9606 GN=SHBG PE=1 SV=2	18986	20210911_zy_plasma_ethcd_1.2885.2885.3	controllerType=0 controllerNumber=1 scan=2885	12.9126
02937:2	6	K.TPLTAN[+1241.454]ITK.S	HexNAc(3)Hex(3)Fuc(1)	N[+1241]	1100.51	2	2200.01	2200.01	0	-2	200	Specific	236.08	121.37	121.37	5.86	32	>sp|P01877|IGHA2_HUMAN Immunoglobulin heavy constant alpha 2 OS=Homo sapiens OX=9606 GN=IGHA2 PE=1 SV=4	10403	20210911_zy_plasma_ethcd_1.3228.3228.2	controllerType=0 controllerNumber=1 scan=3228	14.429
07353:3	46	K.HAN[+2204.772]WTLTPLK.S	HexNAc(4)Hex(5)NeuAc(2)	N[+2205]	1129.14	3	3385.41	3385.42	0	-3.3	251	Specific	236.64	92.07	92.07	5.5	4	>sp|P27169|PON1_HUMAN Serum paraoxonase/arylesterase 1 OS=Homo sapiens OX=9606 GN=PON1 PE=1 SV=3	15463	20210911_zy_plasma_ethcd_1.8063.8063.3	controllerType=0 controllerNumber=1 scan=8063	35.8646
08770:3	34	K.DIVEYYNDSN[+2350.830]GSHVLQGR.F	HexNAc(4)Hex(5)Fuc(1)NeuAc(2)	N[+2351]	1472.93	3	4416.78	4416.79	0	-2	103	Specific	237.2	116.78	53.7	6.34	4	>sp|P25311|ZA2G_HUMAN Zinc-alpha-2-glycoprotein OS=Homo sapiens OX=9606 GN=AZGP1 PE=1 SV=2	18783	20210911_zy_plasma_ethcd_1.9616.9616.3	controllerType=0 controllerNumber=1 scan=9616	42.8482
04926:3	1	K.NLFLN[+2861.000]HSENATAK.D	HexNAc(5)Hex(6)NeuAc(3)	N[+2861]	1440.58	3	4319.73	4319.73	0	-0.2	203	Specific	237.44	106.84	79.64	5.34	163	>sp|P00738|HPT_HUMAN Haptoglobin OS=Homo sapiens OX=9606 GN=HP PE=1 SV=1	3044	20210911_zy_plasma_ethcd_1.5406.5406.3	controllerType=0 controllerNumber=1 scan=5406	24.1294
12144:3	18	R.QNQC[+57.021]FYN[+3226.132]SSYLNVQR.E	HexNAc(6)Hex(7)NeuAc(3)	C[+57], N[+3226]	1716.34	3	5147	5147	0	0.8	87	Specific	237.48	121.35	121.35	4.99	17	>sp|P19652|A1AG2_HUMAN Alpha-1-acid glycoprotein 2 OS=Homo sapiens OX=9606 GN=ORM2 PE=1 SV=2	4531	20210911_zy_plasma_ethcd_1.13320.13320.3	controllerType=0 controllerNumber=1 scan=13320	59.6831
01513:2	5	R.EEQYN[+1663.608]STYR.V	HexNAc(5)Hex(4)	N[+1664]	1427.06	2	2853.11	2853.12	0	-2.1	295	Specific	237.59	169.73	169.73	5.73	45	>sp|P0DOX5|IGG1_HUMAN Immunoglobulin gamma-1 heavy chain OS=Homo sapiens OX=9606 PE=1 SV=2	10252	20210911_zy_plasma_ethcd_1.1670.1670.2	controllerType=0 controllerNumber=1 scan=1670	7.6149
06221:3	2	R.GLTFQQN[+1971.719]ASSM[+15.995]C[+57.021]VPDQDTAIR.V	HexNAc(5)Hex(5)Fuc(1)	C[+57], M[+16], N[+1972]	1442.94	3	4326.8	4326.79	0	1.4	203	Specific	238.08	133.46	13.82	5.57	55	>sp|P01871|IGHM_HUMAN Immunoglobulin heavy constant mu OS=Homo sapiens OX=9606 GN=IGHM PE=1 SV=4	10127	20210911_zy_plasma_ethcd_1.6824.6824.3	controllerType=0 controllerNumber=1 scan=6824	30.4055
03082:3	52	K.TLFC[+57.021]N[+2204.772]ASK.E	HexNAc(4)Hex(5)NeuAc(2)	C[+57], N[+2205]	1049.08	3	3145.22	3145.23	0	-2	60	Specific	238.44	100.64	100.64	4.48	4	>sp|P20851|C4BPB_HUMAN C4b-binding protein beta chain OS=Homo sapiens OX=9606 GN=C4BPB PE=1 SV=1	20233	20210911_zy_plasma_ethcd_1.3387.3387.3	controllerType=0 controllerNumber=1 scan=3387	15.1171
05202:4	1	K.NLFLN[+2921.058]HSEN[+2237.783]ATAK.D	HexNAc(8)Hex(8),HexNAc(4)Hex(7)NeuAc(1)	N[+2238][+2921]	1655.4	4	6618.57	6617.57	1	-1.5	203	Specific	238.48	238.48	12.42	5.8	163	>sp|P00738|HPT_HUMAN Haptoglobin OS=Homo sapiens OX=9606 GN=HP PE=1 SV=1	3044	20210911_zy_plasma_ethcd_1.5709.5709.4	controllerType=0 controllerNumber=1 scan=5709	25.4848
04240:3	13	K.IPC[+57.021]SQPPQIEHGTIN[+2350.830]SSR.S	HexNAc(4)Hex(5)Fuc(1)NeuAc(2)	C[+57], N[+2351]	1457.61	3	4370.8	4371.82	-1	-2.1	868	Specific	238.58	151.21	151.21	6.64	16	>sp|P08603|CFAH_HUMAN Complement factor H OS=Homo sapiens OX=9606 GN=CFH PE=1 SV=4	385	20210911_zy_plasma_ethcd_1.4655.4655.3	controllerType=0 controllerNumber=1 scan=4655	20.7713
13063:3	19	K.N[+2861.000]FTENDLLVR.I	HexNAc(5)Hex(6)NeuAc(3)	N[+2861]	1361.21	3	4081.62	4081.63	0	-2.6	416	Specific	238.6	97.18	97.18	5.64	7	>sp|P00734|THRB_HUMAN Prothrombin OS=Homo sapiens OX=9606 GN=F2 PE=1 SV=2	18404	20210911_zy_plasma_ethcd_1.14325.14325.3	controllerType=0 controllerNumber=1 scan=14325	64.1415
08743:3	3	K.YRGTAGNALM[+15.995]DGASQLMGEN[+2204.772]R.T	HexNAc(4)Hex(5)NeuAc(2)	M[+16], N[+2205]	1477.93	3	4431.79	4432.79	-1	0.6	375	Specific	239.18	162.67	84.17	5.8	38	>sp|P02675|FIBB_HUMAN Fibrinogen beta chain OS=Homo sapiens OX=9606 GN=FGB PE=1 SV=2	6006	20210911_zy_plasma_ethcd_1.9587.9587.3	controllerType=0 controllerNumber=1 scan=9587	42.712
11010:3	3	R.GTAGNALMDGASQLMGEN[+2204.772]R.T	HexNAc(4)Hex(5)NeuAc(2)	N[+2205]	1366.54	3	4097.62	4097.63	0	-3	377	Specific	239.34	113.72	113.72	6.07	38	>sp|P02675|FIBB_HUMAN Fibrinogen beta chain OS=Homo sapiens OX=9606 GN=FGB PE=1 SV=2	6006	20210911_zy_plasma_ethcd_1.12075.12075.3	controllerType=0 controllerNumber=1 scan=12075	54.0349
04751:3	7	R.EEQFN[+2350.830]STFR.V	HexNAc(4)Hex(5)Fuc(1)NeuAc(2)	N[+2351]	1170.12	3	3508.35	3508.35	0	-2	172	Specific	239.46	75.64	75.64	5.62	35	>sp|P01859|IGHG2_HUMAN Immunoglobulin heavy constant gamma 2 OS=Homo sapiens OX=9606 GN=IGHG2 PE=1 SV=2	2858	20210911_zy_plasma_ethcd_1.5215.5215.3	controllerType=0 controllerNumber=1 scan=5215	23.2666
08954:3	11	R.SWPAVGN[+2204.772]C[+57.021]SSALR.W	HexNAc(4)Hex(5)NeuAc(2)	C[+57], N[+2205]	1203.82	3	3609.43	3609.44	0	-2.8	181	Specific	240.31	72.74	72.74	6.08	28	>sp|P02790|HEMO_HUMAN Hemopexin OS=Homo sapiens OX=9606 GN=HPX PE=1 SV=2	9336	20210911_zy_plasma_ethcd_1.9819.9819.3	controllerType=0 controllerNumber=1 scan=9819	43.7895
12529:3	18	R.QNQC[+57.021]FYN[+2861.000]SSYLNVQR.E	HexNAc(5)Hex(6)NeuAc(3)	C[+57], N[+2861]	1594.63	3	4781.86	4781.87	0	-0.7	87	Specific	240.64	137.59	137.59	5.49	17	>sp|P19652|A1AG2_HUMAN Alpha-1-acid glycoprotein 2 OS=Homo sapiens OX=9606 GN=ORM2 PE=1 SV=2	4531	20210911_zy_plasma_ethcd_1.13741.13741.3	controllerType=0 controllerNumber=1 scan=13741	61.5563
04097:3	13	K.IPC[+57.021]SQPPQIEHGTIN[+2204.772]SSR.S	HexNAc(4)Hex(5)NeuAc(2)	C[+57], N[+2205]	1409.26	3	4225.75	4225.76	0	-1.6	868	Specific	241.33	129.38	129.38	6.25	16	>sp|P08603|CFAH_HUMAN Complement factor H OS=Homo sapiens OX=9606 GN=CFH PE=1 SV=4	385	20210911_zy_plasma_ethcd_1.4499.4499.3	controllerType=0 controllerNumber=1 scan=4499	20.094
11319:3	1	K.VVLHPN[+2643.941]YSQVDIGLIK.L	HexNAc(6)Hex(7)NeuAc(1)	N[+2644]	1480.32	3	4438.94	4438.95	0	-1.9	236	Specific	241.52	109.06	109.06	6.14	163	>sp|P00738|HPT_HUMAN Haptoglobin OS=Homo sapiens OX=9606 GN=HP PE=1 SV=1	3044	20210911_zy_plasma_ethcd_1.12414.12414.3	controllerType=0 controllerNumber=1 scan=12414	55.5688
12163:3	29	R.IIVPLNNREN[+2350.830]ISDPTSPLR.T	HexNAc(4)Hex(5)Fuc(1)NeuAc(2)	N[+2351]	1500	3	4497.99	4499.01	-1	-2.8	62	Specific	241.53	154.07	54.86	6.52	13	>sp|P01591|IGJ_HUMAN Immunoglobulin J chain OS=Homo sapiens OX=9606 GN=JCHAIN PE=1 SV=4	4401	20210911_zy_plasma_ethcd_1.13340.13340.3	controllerType=0 controllerNumber=1 scan=13340	59.772
07967:4	1	K.NLFLN[+2188.740]HSEN[+2935.037]ATAK.D	HexNAc(2)Hex(11),HexNAc(6)Hex(7)NeuAc(2)	N[+2189][+2935]	1646.13	4	6581.49	6582.51	-1	-2.6	203	Specific	241.57	120.12	2.28	6.41	163	>sp|P00738|HPT_HUMAN Haptoglobin OS=Homo sapiens OX=9606 GN=HP PE=1 SV=1	3044	20210911_zy_plasma_ethcd_1.8735.8735.4	controllerType=0 controllerNumber=1 scan=8735	38.8431
00986:3	57	K.N[+2861.000]GTR.G	HexNAc(5)Hex(6)NeuAc(3)	N[+2861]	1103.41	3	3308.22	3308.23	0	-2.5	186	Specific	241.79	30.7	30.7	3.81	5	>sp|P01011|AACT_HUMAN Alpha-1-antichymotrypsin OS=Homo sapiens OX=9606 GN=SERPINA3 PE=1 SV=2	8788	20210911_zy_plasma_ethcd_1.1093.1093.3	controllerType=0 controllerNumber=1 scan=1093	5.0684
03721:4	1	K.NLFLN[+3226.132]HSEN[+1622.582]ATAK.D	HexNAc(6)Hex(7)NeuAc(3),HexNAc(4)Hex(5)	N[+1623][+3226]	1577.36	4	6306.44	6307.45	-1	-1.2	203	Specific	242.88	126.87	18.63	6.3	163	>sp|P00738|HPT_HUMAN Haptoglobin OS=Homo sapiens OX=9606 GN=HP PE=1 SV=1	3044	20210911_zy_plasma_ethcd_1.4087.4087.4	controllerType=0 controllerNumber=1 scan=4087	18.2557
04261:3	9	K.TVLTPATNHM[+15.995]GN[+1257.449]VTFTIPANR.E	HexNAc(3)Hex(4)	M[+16], N[+1257]	1176.87	3	3528.59	3528.6	0	-3.5	74	Specific	243.05	185.05	185.05	6.07	22	>sp|P01024|CO3_HUMAN Complement C3 OS=Homo sapiens OX=9606 GN=C3 PE=1 SV=2	731	20210911_zy_plasma_ethcd_1.4678.4678.3	controllerType=0 controllerNumber=1 scan=4678	20.8752
04215:3	3	R.GTAGNALMDGASQLM[+15.995]GEN[+1954.704]R.T	HexNAc(5)Hex(4)NeuAc(1)	M[+16], N[+1955]	1288.52	3	3863.55	3863.56	0	-2	377	Specific	243.19	65.13	65.13	5.69	38	>sp|P02675|FIBB_HUMAN Fibrinogen beta chain OS=Homo sapiens OX=9606 GN=FGB PE=1 SV=2	6006	20210911_zy_plasma_ethcd_1.4628.4628.3	controllerType=0 controllerNumber=1 scan=4628	20.6551
01992:3	12	R.EN[+3517.228]GTISR.Y	HexNAc(6)Hex(7)NeuAc(4)	N[+3517]	1432.22	3	4294.63	4293.62	1	2.5	102	Specific	243.21	29.97	29.97	2.14	28	>sp|P02763|A1AG1_HUMAN Alpha-1-acid glycoprotein 1 OS=Homo sapiens OX=9606 GN=ORM1 PE=1 SV=1	2208	20210911_zy_plasma_ethcd_1.2193.2193.3	controllerType=0 controllerNumber=1 scan=2193	9.8637
05582:4	1	K.NLFLN[+1548.545]HSEN[+3007.058]ATAK.D	HexNAc(3)Hex(4)NeuAc(1),HexNAc(5)Hex(6)Fuc(1)NeuAc(3)	N[+1549][+3007]	1504.09	4	6013.33	6014.34	-1	-0.4	203	Specific	243.95	130.97	6.81	5.7	163	>sp|P00738|HPT_HUMAN Haptoglobin OS=Homo sapiens OX=9606 GN=HP PE=1 SV=1	3044	20210911_zy_plasma_ethcd_1.6125.6125.4	controllerType=0 controllerNumber=1 scan=6125	27.3254
01538:3	12	R.EN[+2569.905]GTISR.Y	HexNAc(5)Hex(6)NeuAc(2)	N[+2570]	1116.1	3	3346.29	3346.29	0	-1.5	102	Specific	244.37	32.3	32.3	3.47	28	>sp|P02763|A1AG1_HUMAN Alpha-1-acid glycoprotein 1 OS=Homo sapiens OX=9606 GN=ORM1 PE=1 SV=1	2208	20210911_zy_plasma_ethcd_1.1697.1697.3	controllerType=0 controllerNumber=1 scan=1697	7.7379
09570:4	2	R.GLTFQQN[+2553.910]ASSM[+15.995]C[+57.021]VPDQDTAIR.V	HexNAc(5)Hex(5)Fuc(1)NeuAc(2)	C[+57], M[+16], N[+2554]	1227.74	4	4907.96	4908.98	-1	-4.1	203	Specific	244.4	164.7	58.08	6.62	55	>sp|P01871|IGHM_HUMAN Immunoglobulin heavy constant mu OS=Homo sapiens OX=9606 GN=IGHM PE=1 SV=4	10127	20210911_zy_plasma_ethcd_1.10495.10495.4	controllerType=0 controllerNumber=1 scan=10495	46.8974
13233:3	11	K.ALPQPQN[+1913.677]VTSLLGC[+57.021]TH.-	HexNAc(4)Hex(5)NeuAc(1)	C[+57], N[+1914]	1217.19	3	3649.55	3649.56	0	-2.9	447	CRagged	244.83	100.65	100.65	5.85	28	>sp|P02790|HEMO_HUMAN Hemopexin OS=Homo sapiens OX=9606 GN=HPX PE=1 SV=2	9336	20210911_zy_plasma_ethcd_1.14511.14511.3	controllerType=0 controllerNumber=1 scan=14511	64.9659
07145:3	4	K.EHEGAIYPDN[+3007.058]TTDFQR.A	HexNAc(5)Hex(6)Fuc(1)NeuAc(3)	N[+3007]	1634.3	3	4900.89	4899.9	1	-2.2	129	Specific	245.53	138.1	2.23	6.3	22	>sp|P00450|CERU_HUMAN Ceruloplasmin OS=Homo sapiens OX=9606 GN=CP PE=1 SV=1	460	20210911_zy_plasma_ethcd_1.7835.7835.3	controllerType=0 controllerNumber=1 scan=7835	34.8621
04206:3	3	R.GTAGNALMDGASQLM[+15.995]GEN[+1954.704]R.T	HexNAc(5)Hex(4)NeuAc(1)	M[+16], N[+1955]	1288.52	3	3863.55	3863.56	0	-2	377	Specific	246.06	140.6	140.6	6.31	38	>sp|P02675|FIBB_HUMAN Fibrinogen beta chain OS=Homo sapiens OX=9606 GN=FGB PE=1 SV=2	6006	20210911_zy_plasma_ethcd_1.4618.4618.3	controllerType=0 controllerNumber=1 scan=4618	20.6131
03407:3	90	R.N[+2204.772]VSWATGR.S	HexNAc(4)Hex(5)NeuAc(2)	N[+2205]	1032.41	3	3095.21	3095.22	0	-2.9	151	Specific	246.45	91.83	91.83	2.47	2	>sp|P08571|CD14_HUMAN Monocyte differentiation antigen CD14 OS=Homo sapiens OX=9606 GN=CD14 PE=1 SV=2	4791	20210911_zy_plasma_ethcd_1.3743.3743.3	controllerType=0 controllerNumber=1 scan=3743	16.7198
10722:3	2	R.GLTFQQN[+2262.814]ASSMC[+57.021]VPDQDTAIR.V	HexNAc(5)Hex(5)Fuc(1)NeuAc(1)	C[+57], N[+2263]	1534.63	3	4601.88	4601.89	0	-3	203	Specific	246.58	162.76	37.91	6.5	55	>sp|P01871|IGHM_HUMAN Immunoglobulin heavy constant mu OS=Homo sapiens OX=9606 GN=IGHM PE=1 SV=4	10127	20210911_zy_plasma_ethcd_1.11759.11759.3	controllerType=0 controllerNumber=1 scan=11759	52.6102
06277:3	4	K.ELHHLQEQN[+2569.905]VSNAFLDK.G	HexNAc(5)Hex(6)NeuAc(2)	N[+2570]	1531.64	3	4592.9	4591.91	1	-1.5	754	Specific	246.59	145.56	145.56	6.37	22	>sp|P00450|CERU_HUMAN Ceruloplasmin OS=Homo sapiens OX=9606 GN=CP PE=1 SV=1	460	20210911_zy_plasma_ethcd_1.6885.6885.3	controllerType=0 controllerNumber=1 scan=6885	30.6732
10543:3	3	R.GTAGNALM[+15.995]DGASQLMGEN[+2204.772]R.T	HexNAc(4)Hex(5)NeuAc(2)	M[+16], N[+2205]	1371.88	3	4113.62	4113.63	0	-2.6	377	Specific	246.98	129.24	102.72	6.42	38	>sp|P02675|FIBB_HUMAN Fibrinogen beta chain OS=Homo sapiens OX=9606 GN=FGB PE=1 SV=2	6006	20210911_zy_plasma_ethcd_1.11563.11563.3	controllerType=0 controllerNumber=1 scan=11563	51.7278
14119:3	10	K.C[+57.021]GLVPVLAENYN[+2861.000]K.S	HexNAc(5)Hex(6)NeuAc(3)	C[+57], N[+2861]	1446.25	3	4336.74	4337.75	-1	-1	421	Specific	247.12	153.26	153.26	5.68	25	>sp|TRFE_HUMAN|(Common contaminant protein)	20484	20210911_zy_plasma_ethcd_1.15480.15480.3	controllerType=0 controllerNumber=1 scan=15480	69.2548
05024:4	1	K.NLFLN[+3226.132]HSEN[+1913.677]ATAK.D	HexNAc(6)Hex(7)NeuAc(3),HexNAc(4)Hex(5)NeuAc(1)	N[+1914][+3226]	1650.64	4	6599.55	6598.54	1	0.6	203	Specific	247.18	247.18	20.62	5.09	163	>sp|P00738|HPT_HUMAN Haptoglobin OS=Homo sapiens OX=9606 GN=HP PE=1 SV=1	3044	20210911_zy_plasma_ethcd_1.5514.5514.4	controllerType=0 controllerNumber=1 scan=5514	24.6146
11206:3	53	K.GAFISN[+2204.772]FSM[+15.995]TVDGK.T	HexNAc(4)Hex(5)NeuAc(2)	M[+16], N[+2205]	1232.16	3	3694.46	3694.47	0	-2.4	113	Specific	247.36	113.62	113.62	6.09	1	>sp|P19823|ITIH2_HUMAN Inter-alpha-trypsin inhibitor heavy chain H2 OS=Homo sapiens OX=9606 GN=ITIH2 PE=1 SV=2	4763	20210911_zy_plasma_ethcd_1.12290.12290.3	controllerType=0 controllerNumber=1 scan=12290	55.0051
05221:3	4	K.EHEGAIYPDN[+2569.905]TTDFQR.A	HexNAc(5)Hex(6)NeuAc(2)	N[+2570]	1488.25	3	4462.74	4462.75	0	-2.2	129	Specific	247.53	139.98	139.98	6.28	22	>sp|P00450|CERU_HUMAN Ceruloplasmin OS=Homo sapiens OX=9606 GN=CP PE=1 SV=1	460	20210911_zy_plasma_ethcd_1.5730.5730.3	controllerType=0 controllerNumber=1 scan=5730	25.58
02906:3	81	R.N[+2350.830]YTLTGR.D	HexNAc(4)Hex(5)Fuc(1)NeuAc(2)	N[+2351]	1059.09	3	3175.25	3175.26	0	-2.5	754	Specific	247.79	86.03	86.03	2.68	2	>sp|P10643|CO7_HUMAN Complement component C7 OS=Homo sapiens OX=9606 GN=C7 PE=1 SV=2	4350	20210911_zy_plasma_ethcd_1.3194.3194.3	controllerType=0 controllerNumber=1 scan=3194	14.2829
13416:4	1	K.VVLHPN[+2204.772]YSQVDIGLIK.L	HexNAc(4)Hex(5)NeuAc(2)	N[+2205]	1000.7	4	3999.77	3999.78	0	-3.5	236	Specific	248.64	204.31	204.31	5.55	163	>sp|P00738|HPT_HUMAN Haptoglobin OS=Homo sapiens OX=9606 GN=HP PE=1 SV=1	3044	20210911_zy_plasma_ethcd_1.14711.14711.4	controllerType=0 controllerNumber=1 scan=14711	65.8449
12250:3	15	K.LNAENN[+2861.000]ATFYFK.I	HexNAc(5)Hex(6)NeuAc(3)	N[+2861]	1431.57	3	4292.68	4292.69	0	-2.2	289	Specific	248.74	105.45	105.45	6.1	23	>sp|P01042|KNG1_HUMAN Kininogen-1 OS=Homo sapiens OX=9606 GN=KNG1 PE=1 SV=2	6533	20210911_zy_plasma_ethcd_1.13436.13436.3	controllerType=0 controllerNumber=1 scan=13436	60.2028
12893:3	12	R.QDQC[+57.021]IYN[+2861.000]TTYLNVQR.E	HexNAc(5)Hex(6)NeuAc(3)	C[+57], N[+2861]	1592.96	3	4776.88	4776.9	0	-3.4	87	Specific	248.84	151.26	151.26	5.81	28	>sp|P02763|A1AG1_HUMAN Alpha-1-acid glycoprotein 1 OS=Homo sapiens OX=9606 GN=ORM1 PE=1 SV=1	2208	20210911_zy_plasma_ethcd_1.14139.14139.3	controllerType=0 controllerNumber=1 scan=14139	63.3257
04098:3	34	R.FGC[+57.021]EIENN[+2861.000]R.S	HexNAc(5)Hex(6)NeuAc(3)	C[+57], N[+2861]	1333.84	3	3999.49	3999.49	0	0.1	121	Specific	248.84	113.22	113.22	4.82	4	>sp|P25311|ZA2G_HUMAN Zinc-alpha-2-glycoprotein OS=Homo sapiens OX=9606 GN=AZGP1 PE=1 SV=2	18783	20210911_zy_plasma_ethcd_1.4500.4500.3	controllerType=0 controllerNumber=1 scan=4500	20.0987
05184:3	4	K.EHEGAIYPDN[+2715.963]TTDFQR.A	HexNAc(5)Hex(6)Fuc(1)NeuAc(2)	N[+2716]	1536.6	3	4607.8	4608.8	-1	-0.8	129	Specific	248.85	156.89	156.89	5.73	22	>sp|P00450|CERU_HUMAN Ceruloplasmin OS=Homo sapiens OX=9606 GN=CP PE=1 SV=1	460	20210911_zy_plasma_ethcd_1.5689.5689.3	controllerType=0 controllerNumber=1 scan=5689	25.3953
01950:3	17	K.PSAGN[+2059.735]NSLYR.D	HexNAc(4)Hex(5)Fuc(1)NeuAc(1)	N[+2060]	1046.76	3	3138.26	3138.26	0	-2.2	158	Specific	248.98	46.93	46.93	5.11	22	>sp|P02749|APOH_HUMAN Beta-2-glycoprotein 1 OS=Homo sapiens OX=9606 GN=APOH PE=1 SV=3	19971	20210911_zy_plasma_ethcd_1.2147.2147.3	controllerType=0 controllerNumber=1 scan=2147	9.6586
07271:4	1	K.NLFLN[+3226.132]HSEN[+2204.772]ATAK.D	HexNAc(6)Hex(7)NeuAc(3),HexNAc(4)Hex(5)NeuAc(2)	N[+2205][+3226]	1722.91	4	6888.63	6889.64	-1	-1.3	203	Specific	249.31	136.9	21.57	6.3	163	>sp|P00738|HPT_HUMAN Haptoglobin OS=Homo sapiens OX=9606 GN=HP PE=1 SV=1	3044	20210911_zy_plasma_ethcd_1.7973.7973.4	controllerType=0 controllerNumber=1 scan=7973	35.4615
01320:3	12	R.NEEYN[+2204.772]K.S	HexNAc(4)Hex(5)NeuAc(2)	N[+2205]	1001.04	3	3001.11	3001.12	0	-2.5	52	Specific	249.68	101.42	101.42	4.53	28	>sp|P02763|A1AG1_HUMAN Alpha-1-acid glycoprotein 1 OS=Homo sapiens OX=9606 GN=ORM1 PE=1 SV=1	2208	20210911_zy_plasma_ethcd_1.1459.1459.3	controllerType=0 controllerNumber=1 scan=1459	6.7095
06557:3	3	R.GTAGNALM[+15.995]DGASQLMGEN[+1622.582]R.T	HexNAc(4)Hex(5)	M[+16], N[+1623]	1177.81	3	3531.42	3531.44	0	-3	377	Specific	249.7	161.6	93.78	6.07	38	>sp|P02675|FIBB_HUMAN Fibrinogen beta chain OS=Homo sapiens OX=9606 GN=FGB PE=1 SV=2	6006	20210911_zy_plasma_ethcd_1.7192.7192.3	controllerType=0 controllerNumber=1 scan=7192	32.0226
09855:3	10	K.C[+57.021]GLVPVLAENYN[+1913.677]K.S	HexNAc(4)Hex(5)NeuAc(1)	C[+57], N[+1914]	1130.81	3	3390.42	3390.43	0	-2.4	421	Specific	250.01	149.97	149.97	6.13	25	>sp|TRFE_HUMAN|(Common contaminant protein)	20484	20210911_zy_plasma_ethcd_1.10808.10808.3	controllerType=0 controllerNumber=1 scan=10808	48.3151
01348:3	16	K.TKPREEQFN[+1241.454]STYR.V	HexNAc(3)Hex(3)Fuc(1)	N[+1241]	966.425	3	2897.26	2897.27	0	-2.2	169	Specific	250.07	84.62	84.62	6.13	25	>sp|P01861|IGHG4_HUMAN Immunoglobulin heavy constant gamma 4 OS=Homo sapiens OX=9606 GN=IGHG4 PE=1 SV=1	12793	20210911_zy_plasma_ethcd_1.1489.1489.3	controllerType=0 controllerNumber=1 scan=1489	6.8392
01326:2	12	R.NEEYN[+1548.545]K.S	HexNAc(3)Hex(4)NeuAc(1)	N[+1549]	1172.95	2	2344.89	2344.89	0	-1.6	52	Specific	250.76	116.65	116.65	4.35	28	>sp|P02763|A1AG1_HUMAN Alpha-1-acid glycoprotein 1 OS=Homo sapiens OX=9606 GN=ORM1 PE=1 SV=1	2208	20210911_zy_plasma_ethcd_1.1465.1465.2	controllerType=0 controllerNumber=1 scan=1465	6.7358
01568:4	11	R.N[+2188.740]GTGHGN[+2586.920]STHHGPEYMR.C	HexNAc(2)Hex(11),HexNAc(5)Hex(7)Fuc(1)NeuAc(1)	N[+2189][+2587]	1657.37	4	6626.45	6627.45	-1	0.4	240	Specific	250.88	131.18	0	5.89	28	>sp|P02790|HEMO_HUMAN Hemopexin OS=Homo sapiens OX=9606 GN=HPX PE=1 SV=2	9336	20210911_zy_plasma_ethcd_1.1730.1730.4	controllerType=0 controllerNumber=1 scan=1730	7.8684
01335:3	12	R.NEEYN[+2350.830]K.S	HexNAc(4)Hex(5)Fuc(1)NeuAc(2)	N[+2351]	1049.73	3	3147.17	3147.18	0	-2.6	52	Specific	250.92	72.61	72.61	4.49	28	>sp|P02763|A1AG1_HUMAN Alpha-1-acid glycoprotein 1 OS=Homo sapiens OX=9606 GN=ORM1 PE=1 SV=1	2208	20210911_zy_plasma_ethcd_1.1475.1475.3	controllerType=0 controllerNumber=1 scan=1475	6.7772
14782:4	1	K.VVLHPN[+3517.228]YSQVDIGLIK.L	HexNAc(6)Hex(7)NeuAc(4)	N[+3517]	1328.56	4	5311.22	5312.24	-1	-2.7	236	Specific	251.06	188.34	188.34	6.37	163	>sp|P00738|HPT_HUMAN Haptoglobin OS=Homo sapiens OX=9606 GN=HP PE=1 SV=1	3044	20210911_zy_plasma_ethcd_1.16206.16206.4	controllerType=0 controllerNumber=1 scan=16206	72.4706
09309:3	3	R.GTAGNALMDGASQLMGEN[+1913.677]R.T	HexNAc(4)Hex(5)NeuAc(1)	N[+1914]	1269.51	3	3806.52	3806.54	0	-3.7	377	Specific	251.64	144.77	65.83	6	38	>sp|P02675|FIBB_HUMAN Fibrinogen beta chain OS=Homo sapiens OX=9606 GN=FGB PE=1 SV=2	6006	20210911_zy_plasma_ethcd_1.10209.10209.3	controllerType=0 controllerNumber=1 scan=10209	45.6051
13901:3	18	R.QNQC[+57.021]FYN[+3663.286]SSYLNVQR.E	HexNAc(6)Hex(7)Fuc(1)NeuAc(4)	C[+57], N[+3663]	1862.06	3	5584.15	5584.15	0	0.3	87	Specific	251.94	144.78	144.78	4.97	17	>sp|P19652|A1AG2_HUMAN Alpha-1-acid glycoprotein 2 OS=Homo sapiens OX=9606 GN=ORM2 PE=1 SV=2	4531	20210911_zy_plasma_ethcd_1.15242.15242.3	controllerType=0 controllerNumber=1 scan=15242	68.2125
03161:3	23	K.EDALN[+3007.058]ETR.E	HexNAc(5)Hex(6)Fuc(1)NeuAc(3)	N[+3007]	1318.84	3	3954.5	3954.5	0	-0.8	82	Specific	252.13	84.46	84.46	3.72	17	>sp|P10909|CLUS_HUMAN Clusterin OS=Homo sapiens OX=9606 GN=CLU PE=1 SV=1	6125	20210911_zy_plasma_ethcd_1.3473.3473.3	controllerType=0 controllerNumber=1 scan=3473	15.5008
01398:3	16	K.TKPREEQFN[+1971.719]STYR.V	HexNAc(5)Hex(5)Fuc(1)	N[+1972]	1209.84	3	3627.52	3627.53	0	-4.7	169	Specific	252.29	68.35	68.35	5.53	25	>sp|P01861|IGHG4_HUMAN Immunoglobulin heavy constant gamma 4 OS=Homo sapiens OX=9606 GN=IGHG4 PE=1 SV=1	12793	20210911_zy_plasma_ethcd_1.1544.1544.3	controllerType=0 controllerNumber=1 scan=1544	7.0834
11724:3	33	R.ADGTVNQIEGEATPVN[+2350.830]LTEPAK.L	HexNAc(4)Hex(5)Fuc(1)NeuAc(2)	N[+2351]	1535.66	3	4604.96	4604.95	0	1.7	83	Specific	252.49	154.29	154.29	5.01	5	>sp|P05090|APOD_HUMAN Apolipoprotein D OS=Homo sapiens OX=9606 GN=APOD PE=1 SV=1	120	20210911_zy_plasma_ethcd_1.12858.12858.3	controllerType=0 controllerNumber=1 scan=12858	57.5711
01261:3	11	R.NGTGHGN[+2350.830]STHHGPEYMR.C	HexNAc(4)Hex(5)Fuc(1)NeuAc(2)	N[+2351]	1401.54	3	4202.6	4202.62	0	-6	240	Specific	252.9	126.01	69.12	6.32	28	>sp|P02790|HEMO_HUMAN Hemopexin OS=Homo sapiens OX=9606 GN=HPX PE=1 SV=2	9336	20210911_zy_plasma_ethcd_1.1394.1394.3	controllerType=0 controllerNumber=1 scan=1394	6.4215
09547:3	2	R.GLTFQQN[+2569.905]ASSMC[+57.021]VPDQDTAIR.V	HexNAc(5)Hex(6)NeuAc(2)	C[+57], N[+2570]	1637	3	4908.98	4908.98	0	0.1	203	Specific	252.9	131.65	2.76	5.71	55	>sp|P01871|IGHM_HUMAN Immunoglobulin heavy constant mu OS=Homo sapiens OX=9606 GN=IGHM PE=1 SV=4	10127	20210911_zy_plasma_ethcd_1.10469.10469.3	controllerType=0 controllerNumber=1 scan=10469	46.7822
02785:3	120	R.N[+1710.598]C[+57.021]SLC[+57.021]ADNIEGK.T	HexNAc(3)Hex(5)NeuAc(1)	C[+57]*2, N[+1711]	1031.07	3	3091.19	3091.19	0	2.8	98	Specific	253.04	26.65	26.65	1.74	3	>sp|P48357|LEPR_HUMAN Leptin receptor OS=Homo sapiens OX=9606 GN=LEPR PE=1 SV=2	11586	20210911_zy_plasma_ethcd_1.3062.3062.3	controllerType=0 controllerNumber=1 scan=3062	13.6938
10741:3	25	K.N[+2204.772]GSLFAFR.G	HexNAc(4)Hex(5)NeuAc(2)	N[+2205]	1039.42	3	3116.24	3116.25	0	-2.2	169	Specific	253.04	75.22	75.22	4.48	10	>sp|P04004|VTNC_HUMAN Vitronectin OS=Homo sapiens OX=9606 GN=VTN PE=1 SV=1	17960	20210911_zy_plasma_ethcd_1.11780.11780.3	controllerType=0 controllerNumber=1 scan=11780	52.7066
05855:4	1	K.NLFLN[+2861.000]HSEN[+1548.545]ATAK.D	HexNAc(5)Hex(6)NeuAc(3),HexNAc(3)Hex(4)NeuAc(1)	N[+1549][+2861]	1467.82	4	5868.28	5868.28	0	-0.5	203	Specific	253.22	253.22	2.23	5.38	163	>sp|P00738|HPT_HUMAN Haptoglobin OS=Homo sapiens OX=9606 GN=HP PE=1 SV=1	3044	20210911_zy_plasma_ethcd_1.6424.6424.4	controllerType=0 controllerNumber=1 scan=6424	28.6405
02037:3	6	K.HYTN[+1897.682]SSQDVTVPC[+57.021]R.V	HexNAc(4)Hex(4)Fuc(1)NeuAc(1)	C[+57], N[+1898]	1187.81	3	3561.42	3561.43	0	-3.3	89	Specific	254.34	98.29	98.29	5.92	32	>sp|P01877|IGHA2_HUMAN Immunoglobulin heavy constant alpha 2 OS=Homo sapiens OX=9606 GN=IGHA2 PE=1 SV=4	10403	20210911_zy_plasma_ethcd_1.2242.2242.3	controllerType=0 controllerNumber=1 scan=2242	10.0635
02543:3	126	K.EN[+3007.058]LTAR.A	HexNAc(5)Hex(6)Fuc(1)NeuAc(3)	N[+3007]	1237.48	3	3710.42	3710.43	0	-2	579	Specific	254.73	30.16	30.16	1.64	2	>sp|Q06033|ITIH3_HUMAN Inter-alpha-trypsin inhibitor heavy chain H3 OS=Homo sapiens OX=9606 GN=ITIH3 PE=1 SV=2	4115	20210911_zy_plasma_ethcd_1.2797.2797.3	controllerType=0 controllerNumber=1 scan=2797	12.5124
04224:3	6	K.TPLTAN[+2350.830]ITK.S	HexNAc(4)Hex(5)Fuc(1)NeuAc(2)	N[+2351]	1103.8	3	3309.38	3309.39	0	-2.9	200	Specific	255.05	119.15	119.15	5.46	32	>sp|P01877|IGHA2_HUMAN Immunoglobulin heavy constant alpha 2 OS=Homo sapiens OX=9606 GN=IGHA2 PE=1 SV=4	10403	20210911_zy_plasma_ethcd_1.4638.4638.3	controllerType=0 controllerNumber=1 scan=4638	20.6998
03148:3	84	R.TLLN[+2407.852]ASR.S	HexNAc(5)Hex(5)NeuAc(2)	N[+2408]	1061.43	3	3182.29	3182.3	0	-2.7	493	Specific	255.05	84.91	84.91	2.68	2	>sp|P0DOX3|IGD_HUMAN Immunoglobulin delta heavy chain OS=Homo sapiens OX=9606 PE=1 SV=1	3827	20210911_zy_plasma_ethcd_1.3459.3459.3	controllerType=0 controllerNumber=1 scan=3459	15.4376
01779:3	7	K.TKPREEQFN[+1647.613]STFR.V	HexNAc(5)Hex(3)Fuc(1)	N[+1648]	1096.48	3	3287.42	3287.43	0	-2.9	168	Specific	255.25	154.6	154.6	5.91	35	>sp|P01859|IGHG2_HUMAN Immunoglobulin heavy constant gamma 2 OS=Homo sapiens OX=9606 GN=IGHG2 PE=1 SV=2	2858	20210911_zy_plasma_ethcd_1.1961.1961.3	controllerType=0 controllerNumber=1 scan=1961	8.8858
00944:3	11	R.NGTGHGN[+2204.772]STHHGPEYM[+15.995]R.C	HexNAc(4)Hex(5)NeuAc(2)	M[+16], N[+2205]	1358.52	3	4073.54	4072.56	1	-6.2	240	Specific	255.46	133.03	60.84	6.32	28	>sp|P02790|HEMO_HUMAN Hemopexin OS=Homo sapiens OX=9606 GN=HPX PE=1 SV=2	9336	20210911_zy_plasma_ethcd_1.1047.1047.3	controllerType=0 controllerNumber=1 scan=1047	4.8683
02309:3	56	R.TC[+57.021]QAWSSMTPHQHN[+2204.772]R.T	HexNAc(4)Hex(5)NeuAc(2)	C[+57], N[+2205]	1349.19	3	4045.56	4045.57	0	-2.3	48	Specific	255.65	122.61	122.61	6.54	2	>sp|P08519|APOA_HUMAN Apolipoprotein(a) OS=Homo sapiens OX=9606 GN=LPA PE=1 SV=1	5663	20210911_zy_plasma_ethcd_1.2540.2540.3	controllerType=0 controllerNumber=1 scan=2540	11.3838
02370:2	7	R.EEQFN[+1241.454]STFR.V	HexNAc(3)Hex(3)Fuc(1)	N[+1241]	1199.99	2	2398.97	2398.98	0	-2.5	172	Specific	255.7	114.55	114.55	5.2	35	>sp|P01859|IGHG2_HUMAN Immunoglobulin heavy constant gamma 2 OS=Homo sapiens OX=9606 GN=IGHG2 PE=1 SV=2	2858	20210911_zy_plasma_ethcd_1.2607.2607.2	controllerType=0 controllerNumber=1 scan=2607	11.6803
06929:4	1	K.NLFLN[+3226.132]HSEN[+2204.772]ATAK.D	HexNAc(6)Hex(7)NeuAc(3),HexNAc(4)Hex(5)NeuAc(2)	N[+2205][+3226]	1722.91	4	6888.62	6889.64	-1	-1.7	203	Specific	256.04	132.02	11.77	6.53	163	>sp|P00738|HPT_HUMAN Haptoglobin OS=Homo sapiens OX=9606 GN=HP PE=1 SV=1	3044	20210911_zy_plasma_ethcd_1.7599.7599.4	controllerType=0 controllerNumber=1 scan=7599	33.8198
04775:3	7	R.EEQFN[+2553.910]STFR.V	HexNAc(5)Hex(5)Fuc(1)NeuAc(2)	N[+2554]	1237.81	3	3711.43	3711.43	0	-1.6	172	Specific	256.55	90.31	90.31	5.4	35	>sp|P01859|IGHG2_HUMAN Immunoglobulin heavy constant gamma 2 OS=Homo sapiens OX=9606 GN=IGHG2 PE=1 SV=2	2858	20210911_zy_plasma_ethcd_1.5241.5241.3	controllerType=0 controllerNumber=1 scan=5241	23.3878
01641:3	16	K.TKPREEQFN[+2059.735]STYR.V	HexNAc(4)Hex(5)Fuc(1)NeuAc(1)	N[+2060]	1239.18	3	3715.54	3715.55	0	-2.7	169	Specific	256.56	3.66	3.66	4.06	25	>sp|P01861|IGHG4_HUMAN Immunoglobulin heavy constant gamma 4 OS=Homo sapiens OX=9606 GN=IGHG4 PE=1 SV=1	12793	20210911_zy_plasma_ethcd_1.1810.1810.3	controllerType=0 controllerNumber=1 scan=1810	8.2176
05727:4	1	K.NLFLN[+2861.000]HSEN[+1548.545]ATAK.D	HexNAc(5)Hex(6)NeuAc(3),HexNAc(3)Hex(4)NeuAc(1)	N[+1549][+2861]	1467.57	4	5867.27	5868.28	-1	-1.7	203	Specific	256.83	111.7	4.6	6.17	163	>sp|P00738|HPT_HUMAN Haptoglobin OS=Homo sapiens OX=9606 GN=HP PE=1 SV=1	3044	20210911_zy_plasma_ethcd_1.6284.6284.4	controllerType=0 controllerNumber=1 scan=6284	28.0242
05767:3	15	R.ITYSIVQTN[+2715.963]C[+57.021]SK.E	HexNAc(5)Hex(6)Fuc(1)NeuAc(2)	C[+57], N[+2716]	1376.89	3	4128.66	4129.67	-1	-0.1	197	Specific	257.1	125.97	125.97	5.7	23	>sp|P01042|KNG1_HUMAN Kininogen-1 OS=Homo sapiens OX=9606 GN=KNG1 PE=1 SV=2	6533	20210911_zy_plasma_ethcd_1.6327.6327.3	controllerType=0 controllerNumber=1 scan=6327	28.2122
01746:3	7	K.TKPREEQFN[+1241.454]STFR.V	HexNAc(3)Hex(3)Fuc(1)	N[+1241]	961.092	3	2881.26	2881.27	0	-3.7	168	Specific	257.14	113.46	113.46	5.72	35	>sp|P01859|IGHG2_HUMAN Immunoglobulin heavy constant gamma 2 OS=Homo sapiens OX=9606 GN=IGHG2 PE=1 SV=2	2858	20210911_zy_plasma_ethcd_1.1925.1925.3	controllerType=0 controllerNumber=1 scan=1925	8.7317
05834:3	15	R.ITYSIVQTN[+2569.905]C[+57.021]SK.E	HexNAc(5)Hex(6)NeuAc(2)	C[+57], N[+2570]	1328.54	3	3983.61	3983.61	0	-0.7	197	Specific	257.22	130.54	130.54	5.51	23	>sp|P01042|KNG1_HUMAN Kininogen-1 OS=Homo sapiens OX=9606 GN=KNG1 PE=1 SV=2	6533	20210911_zy_plasma_ethcd_1.6401.6401.3	controllerType=0 controllerNumber=1 scan=6401	28.5418
05424:4	1	K.NLFLN[+3007.058]HSEN[+1548.545]ATAK.D	HexNAc(5)Hex(6)Fuc(1)NeuAc(3),HexNAc(3)Hex(4)NeuAc(1)	N[+1549][+3007]	1504.34	4	6014.33	6014.34	0	-1.1	203	Specific	257.29	136.2	0	6.01	163	>sp|P00738|HPT_HUMAN Haptoglobin OS=Homo sapiens OX=9606 GN=HP PE=1 SV=1	3044	20210911_zy_plasma_ethcd_1.5952.5952.4	controllerType=0 controllerNumber=1 scan=5952	26.5564
10292:4	12	R.QDQC[+57.021]IYN[+2935.037]TTYLNVQR.E	HexNAc(6)Hex(7)NeuAc(2)	C[+57], N[+2935]	1213.49	4	4850.92	4850.93	0	-2.8	87	Specific	257.39	125.16	125.16	6.14	28	>sp|P02763|A1AG1_HUMAN Alpha-1-acid glycoprotein 1 OS=Homo sapiens OX=9606 GN=ORM1 PE=1 SV=1	2208	20210911_zy_plasma_ethcd_1.11288.11288.4	controllerType=0 controllerNumber=1 scan=11288	50.4976
08504:3	11	R.SWPAVGN[+2569.905]C[+57.021]SSALR.W	HexNAc(5)Hex(6)NeuAc(2)	C[+57], N[+2570]	1325.53	3	3974.56	3974.57	0	-3.1	181	Specific	257.44	90.4	90.4	5.88	28	>sp|P02790|HEMO_HUMAN Hemopexin OS=Homo sapiens OX=9606 GN=HPX PE=1 SV=2	9336	20210911_zy_plasma_ethcd_1.9324.9324.3	controllerType=0 controllerNumber=1 scan=9324	41.5048
05399:3	4	K.EHEGAIYPDN[+2204.772]TTDFQR.A	HexNAc(4)Hex(5)NeuAc(2)	N[+2205]	1366.54	3	4097.6	4097.61	0	-2.1	129	Specific	258.09	114.01	114.01	6.14	22	>sp|P00450|CERU_HUMAN Ceruloplasmin OS=Homo sapiens OX=9606 GN=CP PE=1 SV=1	460	20210911_zy_plasma_ethcd_1.5924.5924.3	controllerType=0 controllerNumber=1 scan=5924	26.436
01009:4	5	K.TKPREEQYN[+1971.719]STYR.V	HexNAc(5)Hex(5)Fuc(1)	N[+1972]	911.635	4	3643.52	3643.53	0	-2.5	291	Specific	258.12	35.18	35.18	5.23	45	>sp|P0DOX5|IGG1_HUMAN Immunoglobulin gamma-1 heavy chain OS=Homo sapiens OX=9606 PE=1 SV=2	10252	20210911_zy_plasma_ethcd_1.1118.1118.3	controllerType=0 controllerNumber=1 scan=1118	5.1859
04290:3	13	K.IPC[+57.021]SQPPQIEHGTIN[+2350.830]SSR.S	HexNAc(4)Hex(5)Fuc(1)NeuAc(2)	C[+57], N[+2351]	1457.61	3	4370.8	4371.82	-1	-2.8	868	Specific	258.39	131.3	57.49	6.78	16	>sp|P08603|CFAH_HUMAN Complement factor H OS=Homo sapiens OX=9606 GN=CFH PE=1 SV=4	385	20210911_zy_plasma_ethcd_1.4710.4710.3	controllerType=0 controllerNumber=1 scan=4710	21.0138
11850:3	67	R.VLYLAAYN[+2204.772]C[+57.021]TLRPVSK.K	HexNAc(4)Hex(5)NeuAc(2)	C[+57], N[+2205]	1358.26	3	4072.77	4072.78	0	-2.2	129	Specific	260.08	151.61	151.61	5.44	2	>sp|Q9UGM5|FETUB_HUMAN Fetuin-B OS=Homo sapiens OX=9606 GN=FETUB PE=1 SV=2	10882	20210911_zy_plasma_ethcd_1.12997.12997.3	controllerType=0 controllerNumber=1 scan=12997	58.2129
02697:3	52	K.EWDN[+2204.772]TTTEC[+57.021]R.L	HexNAc(4)Hex(5)NeuAc(2)	C[+57], N[+2205]	1172.77	3	3516.3	3516.3	0	-1.1	68	Specific	260.53	121.51	121.51	5.51	4	>sp|P20851|C4BPB_HUMAN C4b-binding protein beta chain OS=Homo sapiens OX=9606 GN=C4BPB PE=1 SV=1	20233	20210911_zy_plasma_ethcd_1.2966.2966.3	controllerType=0 controllerNumber=1 scan=2966	13.2746
03794:4	1	K.NLFLN[+2424.867]HSEN[+2204.772]ATAK.D	HexNAc(5)Hex(6)Fuc(1)NeuAc(1),HexNAc(4)Hex(5)NeuAc(2)	N[+2205][+2425]	1522.59	4	6087.35	6088.37	-1	-2.6	203	Specific	261.09	261.09	18.14	6.4	163	>sp|P00738|HPT_HUMAN Haptoglobin OS=Homo sapiens OX=9606 GN=HP PE=1 SV=1	3044	20210911_zy_plasma_ethcd_1.4167.4167.4	controllerType=0 controllerNumber=1 scan=4167	18.6116
05158:4	1	K.NLFLN[+1913.677]HSEN[+3372.190]ATAK.D	HexNAc(4)Hex(5)NeuAc(1),HexNAc(6)Hex(7)Fuc(1)NeuAc(3)	N[+1914][+3372]	1686.9	4	6744.59	6744.6	0	-1.5	203	Specific	261.36	261.36	0.61	5.87	163	>sp|P00738|HPT_HUMAN Haptoglobin OS=Homo sapiens OX=9606 GN=HP PE=1 SV=1	3044	20210911_zy_plasma_ethcd_1.5661.5661.4	controllerType=0 controllerNumber=1 scan=5661	25.2706
01396:2	12	R.NEEYN[+2204.772]K.S	HexNAc(4)Hex(5)NeuAc(2)	N[+2205]	1501.06	2	3001.12	3001.12	0	-1.5	52	Specific	261.67	56.3	56.3	4.1	28	>sp|P02763|A1AG1_HUMAN Alpha-1-acid glycoprotein 1 OS=Homo sapiens OX=9606 GN=ORM1 PE=1 SV=1	2208	20210911_zy_plasma_ethcd_1.1542.1542.2	controllerType=0 controllerNumber=1 scan=1542	7.0727
09204:4	1	K.NLFLN[+2861.000]HSEN[+3007.058]ATAK.D	HexNAc(5)Hex(6)NeuAc(3),HexNAc(5)Hex(6)Fuc(1)NeuAc(3)	N[+2861][+3007]	1832.2	4	7325.79	7326.79	-1	-0.2	203	Specific	262.23	131.36	0	5.65	163	>sp|P00738|HPT_HUMAN Haptoglobin OS=Homo sapiens OX=9606 GN=HP PE=1 SV=1	3044	20210911_zy_plasma_ethcd_1.10094.10094.4	controllerType=0 controllerNumber=1 scan=10094	45.0825
05526:3	3	R.GTAGNALMDGASQLM[+15.995]GEN[+1622.582]R.T	HexNAc(4)Hex(5)	M[+16], N[+1623]	1177.81	3	3531.43	3531.44	0	-1.8	377	Specific	262.86	160.42	139.52	6.23	38	>sp|P02675|FIBB_HUMAN Fibrinogen beta chain OS=Homo sapiens OX=9606 GN=FGB PE=1 SV=2	6006	20210911_zy_plasma_ethcd_1.6063.6063.3	controllerType=0 controllerNumber=1 scan=6063	27.0458
04960:3	46	K.HAN[+1913.677]WTLTPLK.S	HexNAc(4)Hex(5)NeuAc(1)	N[+1914]	1032.11	3	3094.31	3094.32	0	-3.1	251	Specific	263.44	62.51	62.51	5.43	4	>sp|P27169|PON1_HUMAN Serum paraoxonase/arylesterase 1 OS=Homo sapiens OX=9606 GN=PON1 PE=1 SV=3	15463	20210911_zy_plasma_ethcd_1.5444.5444.3	controllerType=0 controllerNumber=1 scan=5444	24.2973
03280:3	7	R.EEQFN[+2059.735]STFR.V	HexNAc(4)Hex(5)Fuc(1)NeuAc(1)	N[+2060]	1073.09	3	3217.25	3217.26	0	-3.3	172	Specific	263.5	91.82	91.82	5.37	35	>sp|P01859|IGHG2_HUMAN Immunoglobulin heavy constant gamma 2 OS=Homo sapiens OX=9606 GN=IGHG2 PE=1 SV=2	2858	20210911_zy_plasma_ethcd_1.3604.3604.3	controllerType=0 controllerNumber=1 scan=3604	16.0977
05375:4	19	R.YPHKPEIN[+2204.772]STTHPGADLQENFC[+57.021]R.N	HexNAc(4)Hex(5)NeuAc(2)	C[+57], N[+2205]	1230.01	4	4917.02	4916.04	1	-4.7	136	Specific	263.55	181.52	181.52	5.53	7	>sp|P00734|THRB_HUMAN Prothrombin OS=Homo sapiens OX=9606 GN=F2 PE=1 SV=2	18404	20210911_zy_plasma_ethcd_1.5898.5898.4	controllerType=0 controllerNumber=1 scan=5898	26.3194
02316:3	7	R.EEQFN[+1930.692]STFR.V	HexNAc(4)Hex(6)Fuc(1)	N[+1931]	1030.07	3	3088.2	3088.21	0	-3.2	172	Specific	264.55	109.54	109.54	5.4	35	>sp|P01859|IGHG2_HUMAN Immunoglobulin heavy constant gamma 2 OS=Homo sapiens OX=9606 GN=IGHG2 PE=1 SV=2	2858	20210911_zy_plasma_ethcd_1.2548.2548.3	controllerType=0 controllerNumber=1 scan=2548	11.4198
02201:3	34	R.FGC[+57.021]EIENN[+1913.677]R.S	HexNAc(4)Hex(5)NeuAc(1)	C[+57], N[+1914]	1018.06	3	3052.16	3052.17	0	-2.8	121	Specific	264.78	92.28	92.28	5.37	4	>sp|P25311|ZA2G_HUMAN Zinc-alpha-2-glycoprotein OS=Homo sapiens OX=9606 GN=AZGP1 PE=1 SV=2	18783	20210911_zy_plasma_ethcd_1.2422.2422.3	controllerType=0 controllerNumber=1 scan=2422	10.8655
01071:3	5	K.PREEQYN[+1606.587]STYR.V	HexNAc(4)Hex(4)Fuc(1)	N[+1607]	1017.09	3	3049.24	3049.25	0	-3.1	293	Specific	264.82	84.32	84.32	5.21	45	>sp|P0DOX5|IGG1_HUMAN Immunoglobulin gamma-1 heavy chain OS=Homo sapiens OX=9606 PE=1 SV=2	10252	20210911_zy_plasma_ethcd_1.1186.1186.3	controllerType=0 controllerNumber=1 scan=1186	5.4921
07067:4	1	K.NLFLN[+1548.545]HSEN[+4028.418]ATAK.D	HexNAc(3)Hex(4)NeuAc(1),HexNAc(7)Hex(8)Fuc(1)NeuAc(4)	N[+1549][+4028]	1759.68	4	7035.69	7035.7	0	-0.5	203	Specific	264.98	264.98	5.21	5.37	163	>sp|P00738|HPT_HUMAN Haptoglobin OS=Homo sapiens OX=9606 GN=HP PE=1 SV=1	3044	20210911_zy_plasma_ethcd_1.7750.7750.4	controllerType=0 controllerNumber=1 scan=7750	34.4803
05910:4	3	K.YRGTAGNALMDGASQLM[+15.995]GEN[+1913.677]R.T	HexNAc(4)Hex(5)NeuAc(1)	M[+16], N[+1914]	1036.18	4	4141.68	4141.7	0	-3.3	375	Specific	265.06	235.63	119.43	6.23	38	>sp|P02675|FIBB_HUMAN Fibrinogen beta chain OS=Homo sapiens OX=9606 GN=FGB PE=1 SV=2	6006	20210911_zy_plasma_ethcd_1.6484.6484.4	controllerType=0 controllerNumber=1 scan=6484	28.9102
11298:3	11	R.SWPAVGN[+2861.000]C[+57.021]SSALR.W	HexNAc(5)Hex(6)NeuAc(3)	C[+57], N[+2861]	1422.56	3	4265.67	4265.67	0	-0.7	181	Specific	265.11	91.12	91.12	5.29	28	>sp|P02790|HEMO_HUMAN Hemopexin OS=Homo sapiens OX=9606 GN=HPX PE=1 SV=2	9336	20210911_zy_plasma_ethcd_1.12391.12391.3	controllerType=0 controllerNumber=1 scan=12391	55.4637
12507:3	10	K.C[+57.021]GLVPVLAENYN[+2569.905]K.S	HexNAc(5)Hex(6)NeuAc(2)	C[+57], N[+2570]	1349.56	3	4046.65	4046.66	0	-0.8	421	Specific	265.71	145.69	145.69	5.33	25	>sp|TRFE_HUMAN|(Common contaminant protein)	20484	20210911_zy_plasma_ethcd_1.13717.13717.3	controllerType=0 controllerNumber=1 scan=13717	61.4521
12506:3	12	R.QDQC[+57.021]IYN[+3372.190]TTYLNVQR.E	HexNAc(6)Hex(7)Fuc(1)NeuAc(3)	C[+57], N[+3372]	1763.37	3	5288.08	5288.09	0	-1.2	87	Specific	265.86	137.82	137.82	5.93	28	>sp|P02763|A1AG1_HUMAN Alpha-1-acid glycoprotein 1 OS=Homo sapiens OX=9606 GN=ORM1 PE=1 SV=1	2208	20210911_zy_plasma_ethcd_1.13716.13716.3	controllerType=0 controllerNumber=1 scan=13716	61.4475
02378:2	7	R.EEQFN[+1606.587]STFR.V	HexNAc(4)Hex(4)Fuc(1)	N[+1607]	1382.56	2	2764.1	2764.11	0	-1.6	172	Specific	266.45	76.13	76.13	5.4	35	>sp|P01859|IGHG2_HUMAN Immunoglobulin heavy constant gamma 2 OS=Homo sapiens OX=9606 GN=IGHG2 PE=1 SV=2	2858	20210911_zy_plasma_ethcd_1.2615.2615.3	controllerType=0 controllerNumber=1 scan=2615	11.7168
00874:3	5	K.TKPREEQYN[+1768.640]STYR.V	HexNAc(4)Hex(5)Fuc(1)	N[+1769]	1147.48	3	3440.43	3440.45	0	-3.9	291	Specific	266.58	43.17	43.17	5.65	45	>sp|P0DOX5|IGG1_HUMAN Immunoglobulin gamma-1 heavy chain OS=Homo sapiens OX=9606 PE=1 SV=2	10252	20210911_zy_plasma_ethcd_1.970.970.3	controllerType=0 controllerNumber=1 scan=970	4.5301
05787:3	15	R.ITYSIVQTN[+2569.905]C[+57.021]SK.E	HexNAc(5)Hex(6)NeuAc(2)	C[+57], N[+2570]	1328.54	3	3983.59	3983.61	0	-3.6	197	Specific	267.26	103.43	103.43	5.76	23	>sp|P01042|KNG1_HUMAN Kininogen-1 OS=Homo sapiens OX=9606 GN=KNG1 PE=1 SV=2	6533	20210911_zy_plasma_ethcd_1.6349.6349.3	controllerType=0 controllerNumber=1 scan=6349	28.3043
06939:4	1	K.NLFLN[+3226.132]HSEN[+2204.772]ATAK.D	HexNAc(6)Hex(7)NeuAc(3),HexNAc(4)Hex(5)NeuAc(2)	N[+2205][+3226]	1722.91	4	6888.62	6889.64	-1	-2.6	203	Specific	267.57	159.06	17.84	6.37	163	>sp|P00738|HPT_HUMAN Haptoglobin OS=Homo sapiens OX=9606 GN=HP PE=1 SV=1	3044	20210911_zy_plasma_ethcd_1.7610.7610.4	controllerType=0 controllerNumber=1 scan=7610	33.8662
03548:3	44	K.C[+57.021]GN[+2204.772]C[+57.021]SLTTLK.D	HexNAc(4)Hex(5)NeuAc(2)	C[+57]*2, N[+2205]	1120.1	3	3358.3	3358.31	0	-2.4	172	Specific	267.7	131.01	131.01	5.75	2	>sp|P49908|SEPP1_HUMAN Selenoprotein P OS=Homo sapiens OX=9606 GN=SELENOP PE=1 SV=3	16703	20210911_zy_plasma_ethcd_1.3897.3897.3	controllerType=0 controllerNumber=1 scan=3897	17.4089
09752:3	17	K.LGN[+2861.000]WSAMPSC[+57.021]K.A	HexNAc(5)Hex(6)NeuAc(3)	C[+57], N[+2861]	1371.19	3	4111.56	4111.57	0	-0.8	251	Specific	268.15	134.63	134.63	5.01	22	>sp|P02749|APOH_HUMAN Beta-2-glycoprotein 1 OS=Homo sapiens OX=9606 GN=APOH PE=1 SV=3	19971	20210911_zy_plasma_ethcd_1.10695.10695.3	controllerType=0 controllerNumber=1 scan=10695	47.8072
07417:3	17	K.LGN[+2204.772]WSAMPSC[+57.021]K.A	HexNAc(4)Hex(5)NeuAc(2)	C[+57], N[+2205]	1152.45	3	3455.33	3455.34	0	-1.8	251	Specific	268.42	129.3	129.3	5.74	22	>sp|P02749|APOH_HUMAN Beta-2-glycoprotein 1 OS=Homo sapiens OX=9606 GN=APOH PE=1 SV=3	19971	20210911_zy_plasma_ethcd_1.8133.8133.3	controllerType=0 controllerNumber=1 scan=8133	36.1734
01102:2	2	K.N[+1038.375]NSDISSTR.G	HexNAc(2)Hex(3)Fuc(1)	N[+1038]	1016.42	2	2031.83	2031.83	0	-0.2	46	Specific	269.52	176.26	176.26	4.72	55	>sp|P01871|IGHM_HUMAN Immunoglobulin heavy constant mu OS=Homo sapiens OX=9606 GN=IGHM PE=1 SV=4	10127	20210911_zy_plasma_ethcd_1.1220.1220.2	controllerType=0 controllerNumber=1 scan=1220	5.6461
08188:3	4	K.ELHHLQEQN[+2861.000]VSNAFLDK.G	HexNAc(5)Hex(6)NeuAc(3)	N[+2861]	1628	3	4881.98	4883	-1	-3.6	754	Specific	269.92	115.99	115.99	6.53	22	>sp|P00450|CERU_HUMAN Ceruloplasmin OS=Homo sapiens OX=9606 GN=CP PE=1 SV=1	460	20210911_zy_plasma_ethcd_1.8977.8977.3	controllerType=0 controllerNumber=1 scan=8977	39.9351
10409:3	12	R.QDQC[+57.021]IYN[+2569.905]TTYLNVQR.E	HexNAc(5)Hex(6)NeuAc(2)	C[+57], N[+2570]	1495.94	3	4485.8	4485.8	0	-0.3	87	Specific	270.04	165.2	165.2	5.19	28	>sp|P02763|A1AG1_HUMAN Alpha-1-acid glycoprotein 1 OS=Homo sapiens OX=9606 GN=ORM1 PE=1 SV=1	2208	20210911_zy_plasma_ethcd_1.11416.11416.3	controllerType=0 controllerNumber=1 scan=11416	51.0682
11785:3	1	K.VVLHPN[+1913.677]YSQVDIGLIK.L	HexNAc(4)Hex(5)NeuAc(1)	N[+1914]	1236.9	3	3708.67	3708.69	0	-3.7	236	Specific	270.11	86.65	86.65	5.78	163	>sp|P00738|HPT_HUMAN Haptoglobin OS=Homo sapiens OX=9606 GN=HP PE=1 SV=1	3044	20210911_zy_plasma_ethcd_1.12925.12925.3	controllerType=0 controllerNumber=1 scan=12925	57.8808
11589:3	1	K.VVLHPN[+2278.809]YSQVDIGLIK.L	HexNAc(5)Hex(6)NeuAc(1)	N[+2279]	1358.61	3	4073.81	4073.82	0	-1.7	236	Specific	270.48	153	153	6.1	163	>sp|P00738|HPT_HUMAN Haptoglobin OS=Homo sapiens OX=9606 GN=HP PE=1 SV=1	3044	20210911_zy_plasma_ethcd_1.12710.12710.3	controllerType=0 controllerNumber=1 scan=12710	56.8914
06972:4	1	K.NLFLN[+2861.000]HSEN[+2715.963]ATAK.D	HexNAc(5)Hex(6)NeuAc(3),HexNAc(5)Hex(6)Fuc(1)NeuAc(2)	N[+2716][+2861]	1759.68	4	7035.7	7035.7	0	0.9	203	Specific	270.55	136.09	0	4.96	163	>sp|P00738|HPT_HUMAN Haptoglobin OS=Homo sapiens OX=9606 GN=HP PE=1 SV=1	3044	20210911_zy_plasma_ethcd_1.7646.7646.4	controllerType=0 controllerNumber=1 scan=7646	34.0272
03040:3	73	R.DTFVN[+2350.830]ASR.T	HexNAc(4)Hex(5)Fuc(1)NeuAc(2)	N[+2351]	1087.43	3	3260.26	3260.27	0	-2.7	234	Specific	270.58	64.88	64.88	2.62	5	>sp|P05155|IC1_HUMAN Plasma protease C1 inhibitor OS=Homo sapiens OX=9606 GN=SERPING1 PE=1 SV=2	9291	20210911_zy_plasma_ethcd_1.3341.3341.3	controllerType=0 controllerNumber=1 scan=3341	14.9119
05454:4	1	K.NLFLN[+3007.058]HSEN[+1548.545]ATAK.D	HexNAc(5)Hex(6)Fuc(1)NeuAc(3),HexNAc(3)Hex(4)NeuAc(1)	N[+1549][+3007]	1504.34	4	6014.32	6014.34	0	-2.2	203	Specific	270.63	126.78	0	6.18	163	>sp|P00738|HPT_HUMAN Haptoglobin OS=Homo sapiens OX=9606 GN=HP PE=1 SV=1	3044	20210911_zy_plasma_ethcd_1.5985.5985.4	controllerType=0 controllerNumber=1 scan=5985	26.6992
09102:3	11	R.SWPAVGN[+2204.772]C[+57.021]SSALR.W	HexNAc(4)Hex(5)NeuAc(2)	C[+57], N[+2205]	1203.82	3	3609.43	3609.44	0	-2.1	181	Specific	271.12	103.74	103.74	6.05	28	>sp|P02790|HEMO_HUMAN Hemopexin OS=Homo sapiens OX=9606 GN=HPX PE=1 SV=2	9336	20210911_zy_plasma_ethcd_1.9982.9982.3	controllerType=0 controllerNumber=1 scan=9982	44.5692
01110:3	2	K.N[+2059.735]NSDISSTR.G	HexNAc(4)Hex(5)Fuc(1)NeuAc(1)	N[+2060]	1018.4	3	3053.19	3053.19	0	-2.5	46	Specific	271.44	122.4	122.4	5.75	55	>sp|P01871|IGHM_HUMAN Immunoglobulin heavy constant mu OS=Homo sapiens OX=9606 GN=IGHM PE=1 SV=4	10127	20210911_zy_plasma_ethcd_1.1229.1229.3	controllerType=0 controllerNumber=1 scan=1229	5.6872
06105:3	25	K.NN[+2350.830]ATVHEQVGGPSLTSDLQAQSK.G	HexNAc(4)Hex(5)Fuc(1)NeuAc(2)	N[+2351]	1578	3	4731.99	4732	0	-2.4	85	Specific	271.77	148.35	44.4	6.31	10	>sp|P04004|VTNC_HUMAN Vitronectin OS=Homo sapiens OX=9606 GN=VTN PE=1 SV=1	17960	20210911_zy_plasma_ethcd_1.6697.6697.3	controllerType=0 controllerNumber=1 scan=6697	29.8428
01734:3	7	K.TKPREEQFN[+1768.640]STFR.V	HexNAc(4)Hex(5)Fuc(1)	N[+1769]	1136.82	3	3408.45	3408.46	0	-3.6	168	Specific	272.01	151.32	151.32	5.56	35	>sp|P01859|IGHG2_HUMAN Immunoglobulin heavy constant gamma 2 OS=Homo sapiens OX=9606 GN=IGHG2 PE=1 SV=2	2858	20210911_zy_plasma_ethcd_1.1912.1912.3	controllerType=0 controllerNumber=1 scan=1912	8.6767
04260:3	3	R.GTAGNALMDGASQLMGEN[+1866.688]R.T	HexNAc(6)Hex(4)	N[+1867]	1253.85	3	3759.54	3759.55	0	-2.5	377	Specific	272.22	149.76	20.85	5.85	38	>sp|P02675|FIBB_HUMAN Fibrinogen beta chain OS=Homo sapiens OX=9606 GN=FGB PE=1 SV=2	6006	20210911_zy_plasma_ethcd_1.4677.4677.3	controllerType=0 controllerNumber=1 scan=4677	20.8705
02325:3	6	K.HYTN[+2350.830]SSQDVTVPC[+57.021]R.V	HexNAc(4)Hex(5)Fuc(1)NeuAc(2)	C[+57], N[+2351]	1338.86	3	4014.57	4014.58	0	-2.3	89	Specific	272.27	156.95	156.95	6.12	32	>sp|P01877|IGHA2_HUMAN Immunoglobulin heavy constant alpha 2 OS=Homo sapiens OX=9606 GN=IGHA2 PE=1 SV=4	10403	20210911_zy_plasma_ethcd_1.2557.2557.3	controllerType=0 controllerNumber=1 scan=2557	11.4632
02287:3	18	R.EN[+3517.228]GTVSR.Y	HexNAc(6)Hex(7)NeuAc(4)	N[+3517]	1427.2	3	4279.6	4279.6	0	-1.5	102	Specific	272.88	91.24	91.24	4.2	17	>sp|P19652|A1AG2_HUMAN Alpha-1-acid glycoprotein 2 OS=Homo sapiens OX=9606 GN=ORM2 PE=1 SV=2	4531	20210911_zy_plasma_ethcd_1.2516.2516.3	controllerType=0 controllerNumber=1 scan=2516	11.2765
02719:3	12	R.EN[+3517.228]GTISR.Y	HexNAc(6)Hex(7)NeuAc(4)	N[+3517]	1431.88	3	4293.61	4293.62	0	-1.4	102	Specific	273.26	30.82	30.82	3.4	28	>sp|P02763|A1AG1_HUMAN Alpha-1-acid glycoprotein 1 OS=Homo sapiens OX=9606 GN=ORM1 PE=1 SV=1	2208	20210911_zy_plasma_ethcd_1.2990.2990.3	controllerType=0 controllerNumber=1 scan=2990	13.3797
03460:3	47	K.AAIPSALDTN[+2059.735]SSK.S	HexNAc(4)Hex(5)Fuc(1)NeuAc(1)	N[+2060]	1112.13	3	3334.38	3334.39	0	-2.8	542	Specific	273.42	106.4	106.4	6.06	5	>sp|Q08380|LG3BP_HUMAN Galectin-3-binding protein OS=Homo sapiens OX=9606 GN=LGALS3BP PE=1 SV=1	4876	20210911_zy_plasma_ethcd_1.3801.3801.3	controllerType=0 controllerNumber=1 scan=3801	16.9781
02774:3	12	R.EN[+3517.228]GTISR.Y	HexNAc(6)Hex(7)NeuAc(4)	N[+3517]	1431.88	3	4293.62	4293.62	0	-0.5	102	Specific	274.87	32.38	32.38	2.73	28	>sp|P02763|A1AG1_HUMAN Alpha-1-acid glycoprotein 1 OS=Homo sapiens OX=9606 GN=ORM1 PE=1 SV=1	2208	20210911_zy_plasma_ethcd_1.3050.3050.3	controllerType=0 controllerNumber=1 scan=3050	13.641
02355:3	18	R.EN[+3517.228]GTVSR.Y	HexNAc(6)Hex(7)NeuAc(4)	N[+3517]	1427.2	3	4279.59	4279.6	0	-1.7	102	Specific	274.93	88.35	88.35	4.2	17	>sp|P19652|A1AG2_HUMAN Alpha-1-acid glycoprotein 2 OS=Homo sapiens OX=9606 GN=ORM2 PE=1 SV=2	4531	20210911_zy_plasma_ethcd_1.2590.2590.3	controllerType=0 controllerNumber=1 scan=2590	11.6092
02463:3	18	R.EN[+3517.228]GTVSR.Y	HexNAc(6)Hex(7)NeuAc(4)	N[+3517]	1427.2	3	4279.59	4279.6	0	-2	102	Specific	275.27	88.17	88.17	4.43	17	>sp|P19652|A1AG2_HUMAN Alpha-1-acid glycoprotein 2 OS=Homo sapiens OX=9606 GN=ORM2 PE=1 SV=2	4531	20210911_zy_plasma_ethcd_1.2709.2709.3	controllerType=0 controllerNumber=1 scan=2709	12.1217
02321:3	7	R.EEQFN[+1768.640]STFR.V	HexNAc(4)Hex(5)Fuc(1)	N[+1769]	976.056	3	2926.15	2926.16	0	-3.2	172	Specific	275.42	125.42	125.42	5.54	35	>sp|P01859|IGHG2_HUMAN Immunoglobulin heavy constant gamma 2 OS=Homo sapiens OX=9606 GN=IGHG2 PE=1 SV=2	2858	20210911_zy_plasma_ethcd_1.2553.2553.3	controllerType=0 controllerNumber=1 scan=2553	11.4441
01472:3	5	R.EEQYN[+1809.666]STYR.V	HexNAc(5)Hex(4)Fuc(1)	N[+1810]	1000.4	3	2999.17	2999.18	0	-2.2	295	Specific	275.48	88.75	88.75	5.57	45	>sp|P0DOX5|IGG1_HUMAN Immunoglobulin gamma-1 heavy chain OS=Homo sapiens OX=9606 PE=1 SV=2	10252	20210911_zy_plasma_ethcd_1.1625.1625.3	controllerType=0 controllerNumber=1 scan=1625	7.4119
02428:2	7	R.EEQFN[+1444.534]STFR.V	HexNAc(4)Hex(3)Fuc(1)	N[+1445]	1301.53	2	2602.05	2602.06	0	-2.2	172	Specific	275.76	128.31	128.31	5.81	35	>sp|P01859|IGHG2_HUMAN Immunoglobulin heavy constant gamma 2 OS=Homo sapiens OX=9606 GN=IGHG2 PE=1 SV=2	2858	20210911_zy_plasma_ethcd_1.2671.2671.2	controllerType=0 controllerNumber=1 scan=2671	11.9584
01184:3	2	K.N[+2262.814]NSDISSTR.G	HexNAc(5)Hex(5)Fuc(1)NeuAc(1)	N[+2263]	1086.09	3	3256.27	3256.27	0	-2.4	46	Specific	276.1	129.69	129.69	5.75	55	>sp|P01871|IGHM_HUMAN Immunoglobulin heavy constant mu OS=Homo sapiens OX=9606 GN=IGHM PE=1 SV=4	10127	20210911_zy_plasma_ethcd_1.1310.1310.3	controllerType=0 controllerNumber=1 scan=1310	6.0409
06393:3	3	R.GTAGNALM[+15.995]DGASQLMGEN[+1622.582]R.T	HexNAc(4)Hex(5)	M[+16], N[+1623]	1177.81	3	3531.43	3531.44	0	-2.5	377	Specific	276.28	163.02	130.61	6.23	38	>sp|P02675|FIBB_HUMAN Fibrinogen beta chain OS=Homo sapiens OX=9606 GN=FGB PE=1 SV=2	6006	20210911_zy_plasma_ethcd_1.7012.7012.3	controllerType=0 controllerNumber=1 scan=7012	31.2359
03334:3	7	R.EEQFN[+2100.761]STFR.V	HexNAc(5)Hex(4)Fuc(1)NeuAc(1)	N[+2101]	1086.76	3	3258.28	3258.28	0	-1.6	172	Specific	276.28	102.52	102.52	5.37	35	>sp|P01859|IGHG2_HUMAN Immunoglobulin heavy constant gamma 2 OS=Homo sapiens OX=9606 GN=IGHG2 PE=1 SV=2	2858	20210911_zy_plasma_ethcd_1.3663.3663.3	controllerType=0 controllerNumber=1 scan=3663	16.3639
13367:3	21	K.VC[+57.021]QDC[+57.021]PLLAPLN[+2204.772]DTR.V	HexNAc(4)Hex(5)NeuAc(2)	C[+57]*2, N[+2205]	1326.21	3	3976.62	3976.62	0	0.6	145	Specific	276.54	147.46	147.46	4.91	12	>sp|P02765|FETUA_HUMAN Alpha-2-HS-glycoprotein OS=Homo sapiens OX=9606 GN=AHSG PE=1 SV=2	4627	20210911_zy_plasma_ethcd_1.14657.14657.3	controllerType=0 controllerNumber=1 scan=14657	65.6079
01302:3	12	R.NEEYN[+2715.963]K.S	HexNAc(5)Hex(6)Fuc(1)NeuAc(2)	N[+2716]	1171.44	3	3512.3	3512.31	0	-3	52	Specific	276.63	95.82	95.82	4.23	28	>sp|P02763|A1AG1_HUMAN Alpha-1-acid glycoprotein 1 OS=Homo sapiens OX=9606 GN=ORM1 PE=1 SV=1	2208	20210911_zy_plasma_ethcd_1.1439.1439.3	controllerType=0 controllerNumber=1 scan=1439	6.62
06854:3	3	R.GTAGNALMDGASQLM[+15.995]GEN[+2204.772]R.T	HexNAc(4)Hex(5)NeuAc(2)	M[+16], N[+2205]	1371.88	3	4113.62	4113.63	0	-0.9	377	Specific	277.39	168.63	66.55	5.49	38	>sp|P02675|FIBB_HUMAN Fibrinogen beta chain OS=Homo sapiens OX=9606 GN=FGB PE=1 SV=2	6006	20210911_zy_plasma_ethcd_1.7517.7517.3	controllerType=0 controllerNumber=1 scan=7517	33.459
12710:4	12	R.QDQC[+57.021]IYN[+3226.132]TTYLNVQR.E	HexNAc(6)Hex(7)NeuAc(3)	C[+57], N[+3226]	1286.01	4	5141.02	5142.03	-1	-1.1	87	Specific	277.52	170.12	170.12	5.5	28	>sp|P02763|A1AG1_HUMAN Alpha-1-acid glycoprotein 1 OS=Homo sapiens OX=9606 GN=ORM1 PE=1 SV=1	2208	20210911_zy_plasma_ethcd_1.13939.13939.4	controllerType=0 controllerNumber=1 scan=13939	62.442
02930:4	1	K.NLFLN[+2407.852]HSEN[+1419.502]ATAK.D	HexNAc(5)Hex(5)NeuAc(2),HexNAc(3)Hex(5)	N[+1420][+2408]	1322.02	4	5285.08	5286.09	-1	-1.2	203	Specific	277.82	277.82	2.56	5.63	163	>sp|P00738|HPT_HUMAN Haptoglobin OS=Homo sapiens OX=9606 GN=HP PE=1 SV=1	3044	20210911_zy_plasma_ethcd_1.3220.3220.4	controllerType=0 controllerNumber=1 scan=3220	14.3959
01575:3	5	K.PREEQYN[+2059.735]STYR.V	HexNAc(4)Hex(5)Fuc(1)NeuAc(1)	N[+2060]	1168.14	3	3502.4	3502.4	0	-1.3	293	Specific	278.5	51.29	51.29	5.1	45	>sp|P0DOX5|IGG1_HUMAN Immunoglobulin gamma-1 heavy chain OS=Homo sapiens OX=9606 PE=1 SV=2	10252	20210911_zy_plasma_ethcd_1.1738.1738.3	controllerType=0 controllerNumber=1 scan=1738	7.9061
02058:3	12	R.EN[+3226.132]GTISR.Y	HexNAc(6)Hex(7)NeuAc(3)	N[+3226]	1334.85	3	4002.52	4002.52	0	0.7	102	Specific	279.29	31.01	31.01	2.33	28	>sp|P02763|A1AG1_HUMAN Alpha-1-acid glycoprotein 1 OS=Homo sapiens OX=9606 GN=ORM1 PE=1 SV=1	2208	20210911_zy_plasma_ethcd_1.2265.2265.3	controllerType=0 controllerNumber=1 scan=2265	10.1557
14132:3	10	K.C[+57.021]GLVPVLAENYN[+2861.000]K.S	HexNAc(5)Hex(6)NeuAc(3)	C[+57], N[+2861]	1446.59	3	4337.75	4337.75	0	-0.7	421	Specific	279.46	175.66	175.66	5.32	25	>sp|TRFE_HUMAN|(Common contaminant protein)	20484	20210911_zy_plasma_ethcd_1.15494.15494.3	controllerType=0 controllerNumber=1 scan=15494	69.3151
02461:3	24	K.FVEGSHN[+1872.651]STVSLTTK.N	HexNAc(3)Hex(6)NeuAc(1)	N[+1873]	1160.49	3	3479.45	3479.46	0	-3.1	3405	Specific	279.7	96.73	96.73	5.86	9	>sp|P04114|APOB_HUMAN Apolipoprotein B-100 OS=Homo sapiens OX=9606 GN=APOB PE=1 SV=2	6234	20210911_zy_plasma_ethcd_1.2707.2707.3	controllerType=0 controllerNumber=1 scan=2707	12.1126
15202:3	1	K.VVLHPN[+2204.772]YSQVDIGLIK.L	HexNAc(4)Hex(5)NeuAc(2)	N[+2205]	1333.93	3	3999.77	3999.78	0	-2.9	236	Specific	279.9	134.75	134.75	6.03	163	>sp|P00738|HPT_HUMAN Haptoglobin OS=Homo sapiens OX=9606 GN=HP PE=1 SV=1	3044	20210911_zy_plasma_ethcd_1.16666.16666.3	controllerType=0 controllerNumber=1 scan=16666	74.5194
02301:3	16	R.EEQFN[+2100.761]STYR.V	HexNAc(5)Hex(4)Fuc(1)NeuAc(1)	N[+2101]	1092.1	3	3274.27	3274.28	0	-2.1	173	Specific	280.36	62.25	62.25	5.66	25	>sp|P01861|IGHG4_HUMAN Immunoglobulin heavy constant gamma 4 OS=Homo sapiens OX=9606 GN=IGHG4 PE=1 SV=1	12793	20210911_zy_plasma_ethcd_1.2531.2531.3	controllerType=0 controllerNumber=1 scan=2531	11.3445
12729:3	12	R.QDQC[+57.021]IYN[+3007.058]TTYLNVQR.E	HexNAc(5)Hex(6)Fuc(1)NeuAc(3)	C[+57], N[+3007]	1641.32	3	4921.94	4922.95	-1	-1.7	87	Specific	281.2	142.66	142.66	6.43	28	>sp|P02763|A1AG1_HUMAN Alpha-1-acid glycoprotein 1 OS=Homo sapiens OX=9606 GN=ORM1 PE=1 SV=1	2208	20210911_zy_plasma_ethcd_1.13960.13960.3	controllerType=0 controllerNumber=1 scan=13960	62.5335
09403:3	3	R.GTAGNALMDGASQLM[+15.995]GEN[+2204.772]R.T	HexNAc(4)Hex(5)NeuAc(2)	M[+16], N[+2205]	1371.54	3	4112.61	4113.63	-1	-2.9	377	Specific	281.26	158.03	140.16	6.42	38	>sp|P02675|FIBB_HUMAN Fibrinogen beta chain OS=Homo sapiens OX=9606 GN=FGB PE=1 SV=2	6006	20210911_zy_plasma_ethcd_1.10312.10312.3	controllerType=0 controllerNumber=1 scan=10312	46.0631
11391:3	4	K.EN[+1913.677]LTAPGSDSAVFFEQGTTR.I	HexNAc(4)Hex(5)NeuAc(1)	N[+1914]	1347.56	3	4040.67	4040.68	0	-2.6	396	Specific	281.91	147.84	147.84	6.77	22	>sp|P00450|CERU_HUMAN Ceruloplasmin OS=Homo sapiens OX=9606 GN=CP PE=1 SV=1	460	20210911_zy_plasma_ethcd_1.12493.12493.3	controllerType=0 controllerNumber=1 scan=12493	55.9238
05718:3	15	R.ITYSIVQTN[+2715.963]C[+57.021]SK.E	HexNAc(5)Hex(6)Fuc(1)NeuAc(2)	C[+57], N[+2716]	1377.22	3	4129.66	4129.67	0	-2.3	197	Specific	282.55	97.73	97.73	6.13	23	>sp|P01042|KNG1_HUMAN Kininogen-1 OS=Homo sapiens OX=9606 GN=KNG1 PE=1 SV=2	6533	20210911_zy_plasma_ethcd_1.6274.6274.3	controllerType=0 controllerNumber=1 scan=6274	27.9811
03578:3	1	K.NLFLNHSEN[+2204.772]ATAK.D	HexNAc(4)Hex(5)NeuAc(2)	N[+2205]	1221.84	3	3663.5	3663.51	0	-2	203	Specific	282.69	113.67	73.83	6.22	163	>sp|P00738|HPT_HUMAN Haptoglobin OS=Homo sapiens OX=9606 GN=HP PE=1 SV=1	3044	20210911_zy_plasma_ethcd_1.3930.3930.3	controllerType=0 controllerNumber=1 scan=3930	17.556
03118:3	73	R.DTFVN[+2204.772]ASR.T	HexNAc(4)Hex(5)NeuAc(2)	N[+2205]	1038.74	3	3114.21	3114.21	0	-2.4	234	Specific	282.89	76.88	76.88	2.72	5	>sp|P05155|IC1_HUMAN Plasma protease C1 inhibitor OS=Homo sapiens OX=9606 GN=SERPING1 PE=1 SV=2	9291	20210911_zy_plasma_ethcd_1.3426.3426.3	controllerType=0 controllerNumber=1 scan=3426	15.2919
08118:4	4	K.ELHHLQEQN[+3007.058]VSNAFLDK.G	HexNAc(5)Hex(6)Fuc(1)NeuAc(3)	N[+3007]	1257.77	4	5028.06	5029.06	-1	0.1	754	Specific	283.11	234.17	234.17	5.49	22	>sp|P00450|CERU_HUMAN Ceruloplasmin OS=Homo sapiens OX=9606 GN=CP PE=1 SV=1	460	20210911_zy_plasma_ethcd_1.8900.8900.4	controllerType=0 controllerNumber=1 scan=8900	39.5891
10533:3	21	K.VC[+57.021]QDC[+57.021]PLLAPLN[+1913.677]DTR.V	HexNAc(4)Hex(5)NeuAc(1)	C[+57]*2, N[+1914]	1229.17	3	3685.51	3685.52	0	-3.7	145	Specific	283.38	124.72	124.72	5.98	12	>sp|P02765|FETUA_HUMAN Alpha-2-HS-glycoprotein OS=Homo sapiens OX=9606 GN=AHSG PE=1 SV=2	4627	20210911_zy_plasma_ethcd_1.11552.11552.3	controllerType=0 controllerNumber=1 scan=11552	51.6783
09381:4	1	K.NLFLN[+3007.058]HSEN[+2861.000]ATAK.D	HexNAc(5)Hex(6)Fuc(1)NeuAc(3),HexNAc(5)Hex(6)NeuAc(3)	N[+2861][+3007]	1832.2	4	7325.78	7326.79	-1	-1.2	203	Specific	284.26	153.56	0	6.23	163	>sp|P00738|HPT_HUMAN Haptoglobin OS=Homo sapiens OX=9606 GN=HP PE=1 SV=1	3044	20210911_zy_plasma_ethcd_1.10288.10288.4	controllerType=0 controllerNumber=1 scan=10288	45.9567
01991:3	12	R.EN[+3372.190]GTISR.Y	HexNAc(6)Hex(7)Fuc(1)NeuAc(3)	N[+3372]	1383.53	3	4148.58	4148.58	0	-0.9	102	Specific	284.54	32.58	32.58	2.93	28	>sp|P02763|A1AG1_HUMAN Alpha-1-acid glycoprotein 1 OS=Homo sapiens OX=9606 GN=ORM1 PE=1 SV=1	2208	20210911_zy_plasma_ethcd_1.2192.2192.3	controllerType=0 controllerNumber=1 scan=2192	9.8592
03125:3	73	R.DTFVN[+2204.772]ASR.T	HexNAc(4)Hex(5)NeuAc(2)	N[+2205]	1038.74	3	3114.21	3114.21	0	-2.8	234	Specific	284.61	71.57	71.57	2.72	5	>sp|P05155|IC1_HUMAN Plasma protease C1 inhibitor OS=Homo sapiens OX=9606 GN=SERPING1 PE=1 SV=2	9291	20210911_zy_plasma_ethcd_1.3434.3434.3	controllerType=0 controllerNumber=1 scan=3434	15.3258
12232:3	54	K.LQAPLN[+2204.772]YTEFQK.P	HexNAc(4)Hex(5)NeuAc(2)	N[+2205]	1219.51	3	3656.52	3656.53	0	-2.8	489	Specific	284.77	149.06	149.06	6.18	7	>sp|P03952|KLKB1_HUMAN Plasma kallikrein OS=Homo sapiens OX=9606 GN=KLKB1 PE=1 SV=1	11889	20210911_zy_plasma_ethcd_1.13416.13416.3	controllerType=0 controllerNumber=1 scan=13416	60.1137
13298:3	1	K.VVLHPN[+2935.037]YSQVDIGLIK.L	HexNAc(6)Hex(7)NeuAc(2)	N[+2935]	1577.35	3	4730.04	4730.05	0	-1.8	236	Specific	284.89	117.58	117.58	6.19	163	>sp|P00738|HPT_HUMAN Haptoglobin OS=Homo sapiens OX=9606 GN=HP PE=1 SV=1	3044	20210911_zy_plasma_ethcd_1.14582.14582.3	controllerType=0 controllerNumber=1 scan=14582	65.2768
13256:4	21	K.VC[+57.021]QDC[+57.021]PLLAPLN[+2919.042]DTRVVHAAK.A	HexNAc(6)Hex(6)Fuc(1)NeuAc(2)	C[+57]*2, N[+2919]	1324.82	4	5296.28	5296.25	0	4.1	145	Specific	284.96	244.35	244.35	4.75	12	>sp|P02765|FETUA_HUMAN Alpha-2-HS-glycoprotein OS=Homo sapiens OX=9606 GN=AHSG PE=1 SV=2	4627	20210911_zy_plasma_ethcd_1.14536.14536.4	controllerType=0 controllerNumber=1 scan=14536	65.079
01058:3	2	K.YKN[+2116.756]NSDISSTR.G	HexNAc(5)Hex(5)NeuAc(1)	N[+2117]	1134.46	3	3401.37	3401.37	0	-2.2	44	Specific	284.97	20.67	20.67	2.76	55	>sp|P01871|IGHM_HUMAN Immunoglobulin heavy constant mu OS=Homo sapiens OX=9606 GN=IGHM PE=1 SV=4	10127	20210911_zy_plasma_ethcd_1.1172.1172.3	controllerType=0 controllerNumber=1 scan=1172	5.4289
13998:3	12	R.QDQC[+57.021]IYN[+3517.228]TTYLNVQR.E	HexNAc(6)Hex(7)NeuAc(4)	C[+57], N[+3517]	1811.71	3	5433.12	5433.12	0	-1.2	87	Specific	284.97	149.44	149.44	5.91	28	>sp|P02763|A1AG1_HUMAN Alpha-1-acid glycoprotein 1 OS=Homo sapiens OX=9606 GN=ORM1 PE=1 SV=1	2208	20210911_zy_plasma_ethcd_1.15348.15348.3	controllerType=0 controllerNumber=1 scan=15348	68.6754
07313:4	1	K.NLFLN[+2861.000]HSEN[+2350.830]ATAK.D	HexNAc(5)Hex(6)NeuAc(3),HexNAc(4)Hex(5)Fuc(1)NeuAc(2)	N[+2351][+2861]	1668.15	4	6669.57	6670.56	-1	2	203	Specific	285.26	162.38	0	4.87	163	>sp|P00738|HPT_HUMAN Haptoglobin OS=Homo sapiens OX=9606 GN=HP PE=1 SV=1	3044	20210911_zy_plasma_ethcd_1.8019.8019.4	controllerType=0 controllerNumber=1 scan=8019	35.6643
00943:3	5	K.TKPREEQYN[+1768.640]STYR.V	HexNAc(4)Hex(5)Fuc(1)	N[+1769]	1147.48	3	3440.44	3440.45	0	-2.3	291	Specific	285.71	37.98	37.98	5.22	45	>sp|P0DOX5|IGG1_HUMAN Immunoglobulin gamma-1 heavy chain OS=Homo sapiens OX=9606 PE=1 SV=2	10252	20210911_zy_plasma_ethcd_1.1046.1046.3	controllerType=0 controllerNumber=1 scan=1046	4.865
04045:3	40	R.GGSSGWSGGLAQN[+2204.772]R.S	HexNAc(4)Hex(5)NeuAc(2)	N[+2205]	1180.13	3	3538.39	3538.4	0	-2.4	425	Specific	286.33	116.34	116.34	6.13	2	>sp|P07357|CO8A_HUMAN Complement component C8 alpha chain OS=Homo sapiens OX=9606 GN=C8A PE=1 SV=2	5176	20210911_zy_plasma_ethcd_1.4442.4442.3	controllerType=0 controllerNumber=1 scan=4442	19.8389
01737:3	18	R.EN[+2861.000]GTVSR.Y	HexNAc(5)Hex(6)NeuAc(3)	N[+2861]	1208.46	3	3623.36	3623.37	0	-3.3	102	Specific	286.43	102.05	102.05	4.36	17	>sp|P19652|A1AG2_HUMAN Alpha-1-acid glycoprotein 2 OS=Homo sapiens OX=9606 GN=ORM2 PE=1 SV=2	4531	20210911_zy_plasma_ethcd_1.1915.1915.3	controllerType=0 controllerNumber=1 scan=1915	8.6886
02182:2	52	K.TLFC[+57.021]N[+1913.677]ASK.E	HexNAc(4)Hex(5)NeuAc(1)	C[+57], N[+1914]	1427.57	2	2854.13	2854.13	0	-1.4	60	Specific	286.77	88.14	88.14	4.37	4	>sp|P20851|C4BPB_HUMAN C4b-binding protein beta chain OS=Homo sapiens OX=9606 GN=C4BPB PE=1 SV=1	20233	20210911_zy_plasma_ethcd_1.2401.2401.2	controllerType=0 controllerNumber=1 scan=2401	10.7718
01272:3	22	K.TKPREEQYN[+1241.454]STFR.V	HexNAc(3)Hex(3)Fuc(1)	N[+1241]	966.424	3	2897.26	2897.27	0	-3.4	219	Specific	287.49	68.79	68.79	5.61	16	>sp|P01860|IGHG3_HUMAN Immunoglobulin heavy constant gamma 3 OS=Homo sapiens OX=9606 GN=IGHG3 PE=1 SV=2	2742	20210911_zy_plasma_ethcd_1.1406.1406.3	controllerType=0 controllerNumber=1 scan=1406	6.4736
03008:3	81	R.N[+2350.830]YTLTGR.D	HexNAc(4)Hex(5)Fuc(1)NeuAc(2)	N[+2351]	1059.09	3	3175.25	3175.26	0	-2.6	754	Specific	287.52	100.42	100.42	2.73	2	>sp|P10643|CO7_HUMAN Complement component C7 OS=Homo sapiens OX=9606 GN=C7 PE=1 SV=2	4350	20210911_zy_plasma_ethcd_1.3306.3306.3	controllerType=0 controllerNumber=1 scan=3306	14.7619
04161:3	13	R.ISEEN[+2204.772]ETTC[+57.021]YMGK.W	HexNAc(4)Hex(5)NeuAc(2)	C[+57], N[+2205]	1256.14	3	3766.41	3766.42	0	-3.6	907	Specific	287.84	179.74	179.74	5.87	16	>sp|P08603|CFAH_HUMAN Complement factor H OS=Homo sapiens OX=9606 GN=CFH PE=1 SV=4	385	20210911_zy_plasma_ethcd_1.4569.4569.3	controllerType=0 controllerNumber=1 scan=4569	20.3987
13413:3	4	K.EN[+2204.772]LTAPGSDSAVFFEQGTTR.I	HexNAc(4)Hex(5)NeuAc(2)	N[+2205]	1444.26	3	4330.76	4331.77	-1	-2.1	396	Specific	287.97	179.61	179.61	7.04	22	>sp|P00450|CERU_HUMAN Ceruloplasmin OS=Homo sapiens OX=9606 GN=CP PE=1 SV=1	460	20210911_zy_plasma_ethcd_1.14708.14708.3	controllerType=0 controllerNumber=1 scan=14708	65.8306
01215:2	24	K.SYN[+2204.772]ETK.I	HexNAc(4)Hex(5)NeuAc(2)	N[+2205]	1473.56	2	2946.11	2946.11	0	-1.5	3222	Specific	287.99	35.03	35.03	3.62	9	>sp|P04114|APOB_HUMAN Apolipoprotein B-100 OS=Homo sapiens OX=9606 GN=APOB PE=1 SV=2	6234	20210911_zy_plasma_ethcd_1.1344.1344.2	controllerType=0 controllerNumber=1 scan=1344	6.1908
05367:3	27	R.FSDGLESN[+2026.687]SSTQFEVK.K	HexNAc(2)Hex(10)	N[+2027]	1267.83	3	3801.49	3801.5	0	-3.3	219	Specific	288.02	203.94	203.94	6.02	7	>sp|P0C0L5|CO4B_HUMAN Complement C4-B OS=Homo sapiens OX=9606 GN=C4B PE=1 SV=2	4060	20210911_zy_plasma_ethcd_1.5889.5889.3	controllerType=0 controllerNumber=1 scan=5889	26.2814
05128:3	4	K.EHEGAIYPDN[+2715.963]TTDFQR.A	HexNAc(5)Hex(6)Fuc(1)NeuAc(2)	N[+2716]	1536.94	3	4608.79	4608.8	0	-2	129	Specific	288.39	192.78	192.78	6.18	22	>sp|P00450|CERU_HUMAN Ceruloplasmin OS=Homo sapiens OX=9606 GN=CP PE=1 SV=1	460	20210911_zy_plasma_ethcd_1.5628.5628.3	controllerType=0 controllerNumber=1 scan=5628	25.1265
02848:3	36	K.DFVN[+2204.772]ASSK.Y	HexNAc(4)Hex(5)NeuAc(2)	N[+2205]	1024.73	3	3072.18	3072.19	0	-2.8	185	Specific	288.5	65.48	65.48	4.54	6	>sp|P05546|HEP2_HUMAN Heparin cofactor 2 OS=Homo sapiens OX=9606 GN=SERPIND1 PE=1 SV=3	4741	20210911_zy_plasma_ethcd_1.3131.3131.3	controllerType=0 controllerNumber=1 scan=3131	13.9958
07830:3	2	R.GLTFQQN[+2262.814]ASSM[+15.995]C[+57.021]VPDQDTAIR.V	HexNAc(5)Hex(5)Fuc(1)NeuAc(1)	C[+57], M[+16], N[+2263]	1539.96	3	4617.88	4617.88	0	-0.9	203	Specific	288.68	160.08	27.23	6.03	55	>sp|P01871|IGHM_HUMAN Immunoglobulin heavy constant mu OS=Homo sapiens OX=9606 GN=IGHM PE=1 SV=4	10127	20210911_zy_plasma_ethcd_1.8585.8585.3	controllerType=0 controllerNumber=1 scan=8585	38.1807
08535:3	11	R.SWPAVGN[+2204.772]C[+57.021]SSALR.W	HexNAc(4)Hex(5)NeuAc(2)	C[+57], N[+2205]	1203.81	3	3609.43	3609.44	0	-3.5	181	Specific	289.6	140.68	140.68	6	28	>sp|P02790|HEMO_HUMAN Hemopexin OS=Homo sapiens OX=9606 GN=HPX PE=1 SV=2	9336	20210911_zy_plasma_ethcd_1.9358.9358.3	controllerType=0 controllerNumber=1 scan=9358	41.658
02533:3	24	K.FVEGSHN[+1548.545]STVSLTTK.N	HexNAc(3)Hex(4)NeuAc(1)	N[+1549]	1052.45	3	3155.34	3155.35	0	-2.7	3405	Specific	289.8	92.55	92.55	6.18	9	>sp|P04114|APOB_HUMAN Apolipoprotein B-100 OS=Homo sapiens OX=9606 GN=APOB PE=1 SV=2	6234	20210911_zy_plasma_ethcd_1.2786.2786.3	controllerType=0 controllerNumber=1 scan=2786	12.4661
05569:4	1	K.NLFLN[+2861.000]HSEN[+1548.545]ATAK.D	HexNAc(5)Hex(6)NeuAc(3),HexNAc(3)Hex(4)NeuAc(1)	N[+1549][+2861]	1467.57	4	5867.27	5868.28	-1	-0.5	203	Specific	290.35	137.71	4.6	5.85	163	>sp|P00738|HPT_HUMAN Haptoglobin OS=Homo sapiens OX=9606 GN=HP PE=1 SV=1	3044	20210911_zy_plasma_ethcd_1.6111.6111.4	controllerType=0 controllerNumber=1 scan=6111	27.2645
13071:3	21	K.VC[+57.021]QDC[+57.021]PLLAPLN[+2350.830]DTR.V	HexNAc(4)Hex(5)Fuc(1)NeuAc(2)	C[+57]*2, N[+2351]	1374.9	3	4122.67	4122.68	0	-1.3	145	Specific	290.97	166.28	166.28	5.9	12	>sp|P02765|FETUA_HUMAN Alpha-2-HS-glycoprotein OS=Homo sapiens OX=9606 GN=AHSG PE=1 SV=2	4627	20210911_zy_plasma_ethcd_1.14334.14334.3	controllerType=0 controllerNumber=1 scan=14334	64.1807
02032:3	12	R.EN[+2861.000]GTISR.Y	HexNAc(5)Hex(6)NeuAc(3)	N[+2861]	1213.13	3	3637.37	3637.39	0	-5.9	102	Specific	290.97	33.64	33.64	3.63	28	>sp|P02763|A1AG1_HUMAN Alpha-1-acid glycoprotein 1 OS=Homo sapiens OX=9606 GN=ORM1 PE=1 SV=1	2208	20210911_zy_plasma_ethcd_1.2236.2236.3	controllerType=0 controllerNumber=1 scan=2236	10.0434
03930:3	4	K.EHEGAIYPDN[+1913.677]TTDFQR.A	HexNAc(4)Hex(5)NeuAc(1)	N[+1914]	1269.51	3	3806.5	3806.52	0	-3.7	129	Specific	291.74	155.17	155.17	5.92	22	>sp|P00450|CERU_HUMAN Ceruloplasmin OS=Homo sapiens OX=9606 GN=CP PE=1 SV=1	460	20210911_zy_plasma_ethcd_1.4316.4316.3	controllerType=0 controllerNumber=1 scan=4316	19.279
07492:4	1	K.NLFLN[+3517.228]HSEN[+1694.603]ATAK.D	HexNAc(6)Hex(7)NeuAc(4),HexNAc(3)Hex(4)Fuc(1)NeuAc(1)	N[+1695][+3517]	1668.14	4	6669.55	6670.56	-1	-1	203	Specific	291.76	158.13	0	5.73	163	>sp|P00738|HPT_HUMAN Haptoglobin OS=Homo sapiens OX=9606 GN=HP PE=1 SV=1	3044	20210911_zy_plasma_ethcd_1.8215.8215.4	controllerType=0 controllerNumber=1 scan=8215	36.5331
04211:3	6	K.TPLTAN[+2350.830]ITK.S	HexNAc(4)Hex(5)Fuc(1)NeuAc(2)	N[+2351]	1103.8	3	3309.38	3309.39	0	-1.9	200	Specific	292.16	139.41	139.41	5.84	32	>sp|P01877|IGHA2_HUMAN Immunoglobulin heavy constant alpha 2 OS=Homo sapiens OX=9606 GN=IGHA2 PE=1 SV=4	10403	20210911_zy_plasma_ethcd_1.4623.4623.3	controllerType=0 controllerNumber=1 scan=4623	20.6351
12335:3	18	R.QNQC[+57.021]FYN[+3226.132]SSYLNVQR.E	HexNAc(6)Hex(7)NeuAc(3)	C[+57], N[+3226]	1716.34	3	5147	5147	0	0	87	Specific	292.54	173.26	173.26	5.29	17	>sp|P19652|A1AG2_HUMAN Alpha-1-acid glycoprotein 2 OS=Homo sapiens OX=9606 GN=ORM2 PE=1 SV=2	4531	20210911_zy_plasma_ethcd_1.13529.13529.3	controllerType=0 controllerNumber=1 scan=13529	60.6188
10365:3	29	R.IIVPLNNREN[+2059.735]ISDPTSPLR.T	HexNAc(4)Hex(5)Fuc(1)NeuAc(1)	N[+2060]	1403.3	3	4207.9	4207.91	0	-3.7	62	Specific	292.57	176.48	176.48	5.97	13	>sp|P01591|IGJ_HUMAN Immunoglobulin J chain OS=Homo sapiens OX=9606 GN=JCHAIN PE=1 SV=4	4401	20210911_zy_plasma_ethcd_1.11367.11367.3	controllerType=0 controllerNumber=1 scan=11367	50.8535
01686:3	22	K.PREEQYN[+1647.613]STFR.V	HexNAc(5)Hex(3)Fuc(1)	N[+1648]	1025.43	3	3074.27	3074.28	0	-3.2	221	Specific	292.64	44.14	44.14	4.89	16	>sp|P01860|IGHG3_HUMAN Immunoglobulin heavy constant gamma 3 OS=Homo sapiens OX=9606 GN=IGHG3 PE=1 SV=2	2742	20210911_zy_plasma_ethcd_1.1859.1859.3	controllerType=0 controllerNumber=1 scan=1859	8.4377
03085:3	81	R.N[+2350.830]YTLTGR.D	HexNAc(4)Hex(5)Fuc(1)NeuAc(2)	N[+2351]	1059.09	3	3175.25	3175.26	0	-2	754	Specific	293.12	103.65	103.65	2.74	2	>sp|P10643|CO7_HUMAN Complement component C7 OS=Homo sapiens OX=9606 GN=C7 PE=1 SV=2	4350	20210911_zy_plasma_ethcd_1.3390.3390.3	controllerType=0 controllerNumber=1 scan=3390	15.131
01106:2	2	K.N[+1403.507]NSDISSTR.G	HexNAc(3)Hex(4)Fuc(1)	N[+1404]	1198.98	2	2396.96	2396.97	0	-2.5	46	Specific	293.21	190.29	190.29	5.77	55	>sp|P01871|IGHM_HUMAN Immunoglobulin heavy constant mu OS=Homo sapiens OX=9606 GN=IGHM PE=1 SV=4	10127	20210911_zy_plasma_ethcd_1.1224.1224.2	controllerType=0 controllerNumber=1 scan=1224	5.6661
14321:3	21	K.VC[+57.021]QDC[+57.021]PLLAPLN[+3007.058]DTR.V	HexNAc(5)Hex(6)Fuc(1)NeuAc(3)	C[+57]*2, N[+3007]	1593.64	3	4778.91	4778.9	0	1.2	145	Specific	293.27	199.75	199.75	4.84	12	>sp|P02765|FETUA_HUMAN Alpha-2-HS-glycoprotein OS=Homo sapiens OX=9606 GN=AHSG PE=1 SV=2	4627	20210911_zy_plasma_ethcd_1.15702.15702.3	controllerType=0 controllerNumber=1 scan=15702	70.2334
12401:3	10	K.C[+57.021]GLVPVLAENYN[+2204.772]K.S	HexNAc(4)Hex(5)NeuAc(2)	C[+57], N[+2205]	1227.84	3	3681.51	3681.52	0	-2.6	421	Specific	293.31	168.14	168.14	6.17	25	>sp|TRFE_HUMAN|(Common contaminant protein)	20484	20210911_zy_plasma_ethcd_1.13601.13601.3	controllerType=0 controllerNumber=1 scan=13601	60.9363
04266:3	9	K.TVLTPATNHM[+15.995]GN[+1419.502]VTFTIPANR.E	HexNAc(3)Hex(5)	M[+16], N[+1420]	1230.89	3	3690.65	3690.66	0	-2.6	74	Specific	293.42	204.98	204.98	6.51	22	>sp|P01024|CO3_HUMAN Complement C3 OS=Homo sapiens OX=9606 GN=C3 PE=1 SV=2	731	20210911_zy_plasma_ethcd_1.4684.4684.3	controllerType=0 controllerNumber=1 scan=4684	20.9007
10679:3	25	K.N[+2204.772]GSLFAFR.G	HexNAc(4)Hex(5)NeuAc(2)	N[+2205]	1039.42	3	3116.24	3116.25	0	-2.3	169	Specific	293.89	138.56	138.56	4.7	10	>sp|P04004|VTNC_HUMAN Vitronectin OS=Homo sapiens OX=9606 GN=VTN PE=1 SV=1	17960	20210911_zy_plasma_ethcd_1.11712.11712.3	controllerType=0 controllerNumber=1 scan=11712	52.3955
01428:2	5	R.EEQYN[+1444.534]STYR.V	HexNAc(4)Hex(3)Fuc(1)	N[+1445]	1317.52	2	2634.04	2634.05	0	-2.4	295	Specific	294.2	141.01	141.01	5.92	45	>sp|P0DOX5|IGG1_HUMAN Immunoglobulin gamma-1 heavy chain OS=Homo sapiens OX=9606 PE=1 SV=2	10252	20210911_zy_plasma_ethcd_1.1577.1577.2	controllerType=0 controllerNumber=1 scan=1577	7.2275
01074:3	5	K.PREEQYN[+1768.640]STYR.V	HexNAc(4)Hex(5)Fuc(1)	N[+1769]	1071.1	3	3211.3	3211.31	0	-2.4	293	Specific	294.29	60.58	60.58	5.44	45	>sp|P0DOX5|IGG1_HUMAN Immunoglobulin gamma-1 heavy chain OS=Homo sapiens OX=9606 PE=1 SV=2	10252	20210911_zy_plasma_ethcd_1.1189.1189.3	controllerType=0 controllerNumber=1 scan=1189	5.5067
02975:3	64	K.GINYN[+2204.772]SSVAK.S	HexNAc(4)Hex(5)NeuAc(2)	N[+2205]	1086.44	3	3257.3	3257.31	0	-2.3	122	Specific	294.39	116.54	116.54	5.71	1	>sp|P03951|FA11_HUMAN Coagulation factor XI OS=Homo sapiens OX=9606 GN=F11 PE=1 SV=1	4279	20210911_zy_plasma_ethcd_1.3270.3270.3	controllerType=0 controllerNumber=1 scan=3270	14.6047
06865:3	3	R.GTAGNALMDGASQLM[+15.995]GEN[+2204.772]R.T	HexNAc(4)Hex(5)NeuAc(2)	M[+16], N[+2205]	1371.54	3	4112.61	4113.63	-1	-3.4	377	Specific	294.51	131.22	131.22	6.46	38	>sp|P02675|FIBB_HUMAN Fibrinogen beta chain OS=Homo sapiens OX=9606 GN=FGB PE=1 SV=2	6006	20210911_zy_plasma_ethcd_1.7529.7529.3	controllerType=0 controllerNumber=1 scan=7529	33.5116
13366:3	1	K.VVLHPN[+2204.772]YSQVDIGLIK.L	HexNAc(4)Hex(5)NeuAc(2)	N[+2205]	1333.93	3	3999.78	3999.78	0	-1.9	236	Specific	294.68	185.92	185.92	6.18	163	>sp|P00738|HPT_HUMAN Haptoglobin OS=Homo sapiens OX=9606 GN=HP PE=1 SV=1	3044	20210911_zy_plasma_ethcd_1.14656.14656.3	controllerType=0 controllerNumber=1 scan=14656	65.6032
00884:3	5	K.TKPREEQYN[+1606.587]STYR.V	HexNAc(4)Hex(4)Fuc(1)	N[+1607]	1093.47	3	3278.39	3278.4	0	-1.8	291	Specific	295.45	61.52	61.52	6.17	45	>sp|P0DOX5|IGG1_HUMAN Immunoglobulin gamma-1 heavy chain OS=Homo sapiens OX=9606 PE=1 SV=2	10252	20210911_zy_plasma_ethcd_1.981.981.3	controllerType=0 controllerNumber=1 scan=981	4.5776
06091:3	29	R.EN[+2204.772]ISDPTSPLR.T	HexNAc(4)Hex(5)NeuAc(2)	N[+2205]	1145.13	3	3433.38	3433.39	0	-2.6	70	Specific	295.63	128.27	128.27	5.85	13	>sp|P01591|IGJ_HUMAN Immunoglobulin J chain OS=Homo sapiens OX=9606 GN=JCHAIN PE=1 SV=4	4401	20210911_zy_plasma_ethcd_1.6682.6682.3	controllerType=0 controllerNumber=1 scan=6682	29.777
02756:3	12	R.EN[+3663.286]GTISR.Y	HexNAc(6)Hex(7)Fuc(1)NeuAc(4)	N[+3663]	1480.56	3	4439.67	4439.68	0	-1.6	102	Specific	295.77	32.24	32.24	3.53	28	>sp|P02763|A1AG1_HUMAN Alpha-1-acid glycoprotein 1 OS=Homo sapiens OX=9606 GN=ORM1 PE=1 SV=1	2208	20210911_zy_plasma_ethcd_1.3030.3030.3	controllerType=0 controllerNumber=1 scan=3030	13.5555
02276:3	37	R.YAEDKFN[+2204.772]ETTEK.S	HexNAc(4)Hex(5)NeuAc(2)	N[+2205]	1227.15	3	3679.43	3679.44	0	-2.6	396	Specific	296.37	154.97	154.97	6.11	5	>sp|P43652|AFAM_HUMAN Afamin OS=Homo sapiens OX=9606 GN=AFM PE=1 SV=1	20367	20210911_zy_plasma_ethcd_1.2504.2504.3	controllerType=0 controllerNumber=1 scan=2504	11.222
05169:3	17	K.LGN[+1913.677]WSAMPSC[+57.021]K.A	HexNAc(4)Hex(5)NeuAc(1)	C[+57], N[+1914]	1055.42	3	3164.23	3164.24	0	-2.8	251	Specific	297.05	115.72	115.72	5.71	22	>sp|P02749|APOH_HUMAN Beta-2-glycoprotein 1 OS=Homo sapiens OX=9606 GN=APOH PE=1 SV=3	19971	20210911_zy_plasma_ethcd_1.5673.5673.3	controllerType=0 controllerNumber=1 scan=5673	25.3211
12740:3	12	R.QDQC[+57.021]IYN[+2878.015]TTYLNVQR.E	HexNAc(5)Hex(7)Fuc(1)NeuAc(2)	C[+57], N[+2878]	1598.64	3	4793.91	4793.91	0	0.3	87	Specific	297.11	178.76	178.76	5	28	>sp|P02763|A1AG1_HUMAN Alpha-1-acid glycoprotein 1 OS=Homo sapiens OX=9606 GN=ORM1 PE=1 SV=1	2208	20210911_zy_plasma_ethcd_1.13972.13972.3	controllerType=0 controllerNumber=1 scan=13972	62.5859
13842:3	36	K.N[+2350.830]LSMPLLPADFHK.E	HexNAc(4)Hex(5)Fuc(1)NeuAc(2)	N[+2351]	1278.54	3	3833.6	3833.61	0	-2	49	Specific	297.12	160.48	160.48	6.23	6	>sp|P05546|HEP2_HUMAN Heparin cofactor 2 OS=Homo sapiens OX=9606 GN=SERPIND1 PE=1 SV=3	4741	20210911_zy_plasma_ethcd_1.15178.15178.3	controllerType=0 controllerNumber=1 scan=15178	67.9332
02767:3	7	R.EEQFN[+2059.735]STFR.V	HexNAc(4)Hex(5)Fuc(1)NeuAc(1)	N[+2060]	1073.09	3	3217.25	3217.26	0	-1.4	172	Specific	297.22	43.79	43.79	5.27	35	>sp|P01859|IGHG2_HUMAN Immunoglobulin heavy constant gamma 2 OS=Homo sapiens OX=9606 GN=IGHG2 PE=1 SV=2	2858	20210911_zy_plasma_ethcd_1.3042.3042.4	controllerType=0 controllerNumber=1 scan=3042	13.6079
13265:3	23	R.LAN[+2861.000]LTQGEDQYYLR.V	HexNAc(5)Hex(6)NeuAc(3)	N[+2861]	1515.28	3	4543.82	4544.83	-1	-2.6	372	Specific	297.68	158.23	158.23	6.44	17	>sp|P10909|CLUS_HUMAN Clusterin OS=Homo sapiens OX=9606 GN=CLU PE=1 SV=1	6125	20210911_zy_plasma_ethcd_1.14546.14546.3	controllerType=0 controllerNumber=1 scan=14546	65.1232
01099:2	2	K.N[+1694.603]NSDISSTR.G	HexNAc(3)Hex(4)Fuc(1)NeuAc(1)	N[+1695]	1344.53	2	2688.06	2688.06	0	-2.1	46	Specific	298.53	159.65	159.65	5.79	55	>sp|P01871|IGHM_HUMAN Immunoglobulin heavy constant mu OS=Homo sapiens OX=9606 GN=IGHM PE=1 SV=4	10127	20210911_zy_plasma_ethcd_1.1217.1217.2	controllerType=0 controllerNumber=1 scan=1217	5.6351
10615:3	3	R.GTAGNALM[+15.995]DGASQLMGEN[+2204.772]R.T	HexNAc(4)Hex(5)NeuAc(2)	M[+16], N[+2205]	1371.88	3	4113.62	4113.63	0	-2.1	377	Specific	298.79	162.05	127.12	6.32	38	>sp|P02675|FIBB_HUMAN Fibrinogen beta chain OS=Homo sapiens OX=9606 GN=FGB PE=1 SV=2	6006	20210911_zy_plasma_ethcd_1.11642.11642.3	controllerType=0 controllerNumber=1 scan=11642	52.0829
01949:3	16	K.PREEQFN[+1897.682]STYR.V	HexNAc(4)Hex(4)Fuc(1)NeuAc(1)	N[+1898]	1108.79	3	3324.34	3324.35	0	-3.5	171	Specific	298.97	100.12	100.12	5.32	25	>sp|P01861|IGHG4_HUMAN Immunoglobulin heavy constant gamma 4 OS=Homo sapiens OX=9606 GN=IGHG4 PE=1 SV=1	12793	20210911_zy_plasma_ethcd_1.2146.2146.3	controllerType=0 controllerNumber=1 scan=2146	9.6546
03564:3	13	K.MDGASN[+2204.772]VTC[+57.021]INSR.W	HexNAc(4)Hex(5)NeuAc(2)	C[+57], N[+2205]	1210.47	3	3629.39	3629.4	0	-2.8	1024	Specific	299.11	110.5	110.5	6.16	16	>sp|P08603|CFAH_HUMAN Complement factor H OS=Homo sapiens OX=9606 GN=CFH PE=1 SV=4	385	20210911_zy_plasma_ethcd_1.3915.3915.3	controllerType=0 controllerNumber=1 scan=3915	17.4887
05190:3	2	R.GLTFQQN[+2157.783]ASSMC[+57.021]VPDQDTAIR.V	HexNAc(6)Hex(4)NeuAc(1)	C[+57], N[+2158]	1499.62	3	4496.85	4496.86	0	-2	203	Specific	299.15	184.79	26.85	6.73	55	>sp|P01871|IGHM_HUMAN Immunoglobulin heavy constant mu OS=Homo sapiens OX=9606 GN=IGHM PE=1 SV=4	10127	20210911_zy_plasma_ethcd_1.5696.5696.3	controllerType=0 controllerNumber=1 scan=5696	25.4265
06359:3	27	R.GLN[+2204.772]VTLSSTGR.N	HexNAc(4)Hex(5)NeuAc(2)	N[+2205]	1103.79	3	3309.36	3309.37	0	-3.2	1326	Specific	299.42	139.53	139.53	5.64	7	>sp|P0C0L5|CO4B_HUMAN Complement C4-B OS=Homo sapiens OX=9606 GN=C4B PE=1 SV=2	4060	20210911_zy_plasma_ethcd_1.6975.6975.3	controllerType=0 controllerNumber=1 scan=6975	31.0712
13487:3	25	K.N[+3007.058]GSLFAFR.G	HexNAc(5)Hex(6)Fuc(1)NeuAc(3)	N[+3007]	1306.85	3	3918.52	3918.53	0	-2.1	169	Specific	299.61	130.22	130.22	4.7	10	>sp|P04004|VTNC_HUMAN Vitronectin OS=Homo sapiens OX=9606 GN=VTN PE=1 SV=1	17960	20210911_zy_plasma_ethcd_1.14789.14789.3	controllerType=0 controllerNumber=1 scan=14789	66.193
12686:4	15	R.HGIQYFNN[+3007.058]NTQHSSLFM[+15.995]LNEVK.R	HexNAc(5)Hex(6)Fuc(1)NeuAc(3)	M[+16], N[+3007]	1411.83	4	5644.3	5644.31	0	-2.3	162	Specific	300.42	253.85	253.85	6.48	23	>sp|P01042|KNG1_HUMAN Kininogen-1 OS=Homo sapiens OX=9606 GN=KNG1 PE=1 SV=2	6533	20210911_zy_plasma_ethcd_1.13913.13913.4	controllerType=0 controllerNumber=1 scan=13913	62.3266
03830:3	28	K.QSVPAHFVALN[+1710.598]GSK.L	HexNAc(3)Hex(5)NeuAc(1)	N[+1711]	1055.79	3	3165.37	3165.37	0	-1.2	611	Specific	300.43	141.14	141.14	5.61	6	>sp|P06681|CO2_HUMAN Complement C2 OS=Homo sapiens OX=9606 GN=C2 PE=1 SV=2	8379	20210911_zy_plasma_ethcd_1.4206.4206.3	controllerType=0 controllerNumber=1 scan=4206	18.7862
01131:3	38	K.N[+1913.677]GTAVC[+57.021]ATNR.R	HexNAc(4)Hex(5)NeuAc(1)	C[+57], N[+1914]	993.059	3	2977.16	2977.17	0	-3	70	Specific	300.94	165.52	165.52	5.48	3	>sp|P05156|CFAI_HUMAN Complement factor I OS=Homo sapiens OX=9606 GN=CFI PE=1 SV=2	8939	20210911_zy_plasma_ethcd_1.1252.1252.3	controllerType=0 controllerNumber=1 scan=1252	5.786
07590:3	17	K.LGN[+2204.772]WSAMPSC[+57.021]K.A	HexNAc(4)Hex(5)NeuAc(2)	C[+57], N[+2205]	1152.45	3	3455.33	3455.34	0	-2.8	251	Specific	301.33	119.31	119.31	5.68	22	>sp|P02749|APOH_HUMAN Beta-2-glycoprotein 1 OS=Homo sapiens OX=9606 GN=APOH PE=1 SV=3	19971	20210911_zy_plasma_ethcd_1.8322.8322.3	controllerType=0 controllerNumber=1 scan=8322	37.0042
12707:3	10	K.C[+57.021]GLVPVLAENYN[+2204.772]K.S	HexNAc(4)Hex(5)NeuAc(2)	C[+57], N[+2205]	1227.84	3	3681.51	3681.52	0	-3.3	421	Specific	302.21	183.91	183.91	5.91	25	>sp|TRFE_HUMAN|(Common contaminant protein)	20484	20210911_zy_plasma_ethcd_1.13936.13936.3	controllerType=0 controllerNumber=1 scan=13936	62.428
05571:4	1	K.NLFLN[+2861.000]HSEN[+1913.677]ATAK.D	HexNAc(5)Hex(6)NeuAc(3),HexNAc(4)Hex(5)NeuAc(1)	N[+1914][+2861]	1559.11	4	6233.4	6233.41	0	-1	203	Specific	302.49	302.49	0	5.64	163	>sp|P00738|HPT_HUMAN Haptoglobin OS=Homo sapiens OX=9606 GN=HP PE=1 SV=1	3044	20210911_zy_plasma_ethcd_1.6113.6113.4	controllerType=0 controllerNumber=1 scan=6113	27.2735
02218:2	6	K.TPLTAN[+1809.666]ITK.S	HexNAc(5)Hex(4)Fuc(1)	N[+1810]	1384.61	2	2768.22	2768.22	0	-1.2	200	Specific	302.77	132.15	132.15	5.65	32	>sp|P01877|IGHA2_HUMAN Immunoglobulin heavy constant alpha 2 OS=Homo sapiens OX=9606 GN=IGHA2 PE=1 SV=4	10403	20210911_zy_plasma_ethcd_1.2440.2440.2	controllerType=0 controllerNumber=1 scan=2440	10.9441
00954:3	5	K.TKPREEQYN[+1606.587]STYR.V	HexNAc(4)Hex(4)Fuc(1)	N[+1607]	1093.47	3	3278.39	3278.4	0	-2.6	291	Specific	302.92	60.02	60.02	5.71	45	>sp|P0DOX5|IGG1_HUMAN Immunoglobulin gamma-1 heavy chain OS=Homo sapiens OX=9606 PE=1 SV=2	10252	20210911_zy_plasma_ethcd_1.1058.1058.3	controllerType=0 controllerNumber=1 scan=1058	4.914
07176:4	1	K.NLFLN[+2861.000]HSEN[+2204.772]ATAK.D	HexNAc(5)Hex(6)NeuAc(3),HexNAc(4)Hex(5)NeuAc(2)	N[+2205][+2861]	1631.88	4	6524.5	6524.51	0	-1.4	203	Specific	304.01	304.01	1.3	6.14	163	>sp|P00738|HPT_HUMAN Haptoglobin OS=Homo sapiens OX=9606 GN=HP PE=1 SV=1	3044	20210911_zy_plasma_ethcd_1.7869.7869.4	controllerType=0 controllerNumber=1 scan=7869	35.0107
03796:3	37	R.DIENFN[+2204.772]STQK.F	HexNAc(4)Hex(5)NeuAc(2)	N[+2205]	1134.11	3	3400.32	3400.33	0	-2.8	28	Specific	304.24	153.88	153.88	5.7	5	>sp|P43652|AFAM_HUMAN Afamin OS=Homo sapiens OX=9606 GN=AFM PE=1 SV=1	20367	20210911_zy_plasma_ethcd_1.4169.4169.3	controllerType=0 controllerNumber=1 scan=4169	18.6207
00769:3	23	R.HN[+1913.677]STGC[+57.021]LR.M	HexNAc(4)Hex(5)NeuAc(1)	C[+57], N[+1914]	953.374	3	2858.11	2858.11	0	-2.3	290	Specific	304.42	86.75	86.75	4.58	17	>sp|P10909|CLUS_HUMAN Clusterin OS=Homo sapiens OX=9606 GN=CLU PE=1 SV=1	6125	20210911_zy_plasma_ethcd_1.855.855.3	controllerType=0 controllerNumber=1 scan=855	4.0078
12496:3	10	K.C[+57.021]GLVPVLAENYN[+2204.772]K.S	HexNAc(4)Hex(5)NeuAc(2)	C[+57], N[+2205]	1227.84	3	3681.52	3681.52	0	-1.8	421	Specific	304.95	142.65	142.65	6.13	25	>sp|TRFE_HUMAN|(Common contaminant protein)	20484	20210911_zy_plasma_ethcd_1.13705.13705.3	controllerType=0 controllerNumber=1 scan=13705	61.3973
12325:3	10	K.C[+57.021]GLVPVLAENYN[+2569.905]K.S	HexNAc(5)Hex(6)NeuAc(2)	C[+57], N[+2570]	1349.55	3	4046.65	4046.66	0	-2.1	421	Specific	305.23	158.69	158.69	6.13	25	>sp|TRFE_HUMAN|(Common contaminant protein)	20484	20210911_zy_plasma_ethcd_1.13518.13518.3	controllerType=0 controllerNumber=1 scan=13518	60.5697
02039:3	12	R.EN[+2861.000]GTISR.Y	HexNAc(5)Hex(6)NeuAc(3)	N[+2861]	1213.13	3	3637.38	3637.39	0	-2.5	102	Specific	305.45	33.31	33.31	3.84	28	>sp|P02763|A1AG1_HUMAN Alpha-1-acid glycoprotein 1 OS=Homo sapiens OX=9606 GN=ORM1 PE=1 SV=1	2208	20210911_zy_plasma_ethcd_1.2244.2244.3	controllerType=0 controllerNumber=1 scan=2244	10.0714
09538:3	10	K.C[+57.021]GLVPVLAENYN[+2278.809]K.S	HexNAc(5)Hex(6)NeuAc(1)	C[+57], N[+2279]	1252.52	3	3755.55	3755.56	0	-2.8	421	Specific	305.76	192.17	192.17	6.12	25	>sp|TRFE_HUMAN|(Common contaminant protein)	20484	20210911_zy_plasma_ethcd_1.10460.10460.3	controllerType=0 controllerNumber=1 scan=10460	46.7376
11881:3	33	R.ADGTVNQIEGEATPVN[+2350.830]LTEPAK.L	HexNAc(4)Hex(5)Fuc(1)NeuAc(2)	N[+2351]	1535.66	3	4604.95	4604.95	0	0.8	83	Specific	306.23	201.93	201.93	5.16	5	>sp|P05090|APOD_HUMAN Apolipoprotein D OS=Homo sapiens OX=9606 GN=APOD PE=1 SV=1	120	20210911_zy_plasma_ethcd_1.13031.13031.3	controllerType=0 controllerNumber=1 scan=13031	58.366
01681:3	22	K.PREEQYN[+1809.666]STFR.V	HexNAc(5)Hex(4)Fuc(1)	N[+1810]	1079.45	3	3236.33	3236.34	0	-2.7	221	Specific	307.59	32.25	32.25	4.37	16	>sp|P01860|IGHG3_HUMAN Immunoglobulin heavy constant gamma 3 OS=Homo sapiens OX=9606 GN=IGHG3 PE=1 SV=2	2742	20210911_zy_plasma_ethcd_1.1854.1854.3	controllerType=0 controllerNumber=1 scan=1854	8.4156
07141:4	1	K.NLFLN[+3226.132]HSEN[+2350.793]ATAK.D	HexNAc(6)Hex(7)NeuAc(3),HexNAc(2)Hex(12)	N[+2351][+3226]	1759.43	4	7034.68	7035.66	-1	3.6	203	Specific	307.72	307.72	0.73	5.09	163	>sp|P00738|HPT_HUMAN Haptoglobin OS=Homo sapiens OX=9606 GN=HP PE=1 SV=1	3044	20210911_zy_plasma_ethcd_1.7831.7831.4	controllerType=0 controllerNumber=1 scan=7831	34.8446
03347:4	19	R.SRYPHKPEIN[+1913.677]STTHPGADLQENFC[+57.021]R.N	HexNAc(4)Hex(5)NeuAc(1)	C[+57], N[+1914]	1217.77	4	4868.07	4868.07	0	-0.7	134	Specific	307.84	226.43	226.43	4.84	7	>sp|P00734|THRB_HUMAN Prothrombin OS=Homo sapiens OX=9606 GN=F2 PE=1 SV=2	18404	20210911_zy_plasma_ethcd_1.3677.3677.4	controllerType=0 controllerNumber=1 scan=3677	16.4278
04278:3	6	K.TPLTAN[+2553.910]ITK.S	HexNAc(5)Hex(5)Fuc(1)NeuAc(2)	N[+2554]	1171.49	3	3512.46	3512.47	0	-2.3	200	Specific	307.87	150.89	150.89	5.7	32	>sp|P01877|IGHA2_HUMAN Immunoglobulin heavy constant alpha 2 OS=Homo sapiens OX=9606 GN=IGHA2 PE=1 SV=4	10403	20210911_zy_plasma_ethcd_1.4697.4697.3	controllerType=0 controllerNumber=1 scan=4697	20.9559
14276:3	10	K.C[+57.021]GLVPVLAENYN[+2861.000]K.S	HexNAc(5)Hex(6)NeuAc(3)	C[+57], N[+2861]	1446.59	3	4337.75	4337.75	0	-0.4	421	Specific	307.94	208.26	208.26	5.38	25	>sp|TRFE_HUMAN|(Common contaminant protein)	20484	20210911_zy_plasma_ethcd_1.15653.15653.3	controllerType=0 controllerNumber=1 scan=15653	70.0157
11094:3	23	R.LAN[+2204.772]LTQGEDQYYLR.V	HexNAc(4)Hex(5)NeuAc(2)	N[+2205]	1296.87	3	3888.59	3888.61	0	-3.5	372	Specific	308.95	144.82	144.82	5.91	17	>sp|P10909|CLUS_HUMAN Clusterin OS=Homo sapiens OX=9606 GN=CLU PE=1 SV=1	6125	20210911_zy_plasma_ethcd_1.12167.12167.3	controllerType=0 controllerNumber=1 scan=12167	54.4475
12848:3	12	R.QDQC[+57.021]IYN[+3007.058]TTYLNVQR.E	HexNAc(5)Hex(6)Fuc(1)NeuAc(3)	C[+57], N[+3007]	1641.65	3	4922.94	4922.95	0	-2	87	Specific	310.2	185.32	185.32	6.08	28	>sp|P02763|A1AG1_HUMAN Alpha-1-acid glycoprotein 1 OS=Homo sapiens OX=9606 GN=ORM1 PE=1 SV=1	2208	20210911_zy_plasma_ethcd_1.14090.14090.3	controllerType=0 controllerNumber=1 scan=14090	63.1087
01386:3	22	K.TKPREEQYN[+1647.613]STFR.V	HexNAc(5)Hex(3)Fuc(1)	N[+1648]	1101.81	3	3303.42	3303.43	0	-2.3	219	Specific	310.27	88.54	88.54	5.99	16	>sp|P01860|IGHG3_HUMAN Immunoglobulin heavy constant gamma 3 OS=Homo sapiens OX=9606 GN=IGHG3 PE=1 SV=2	2742	20210911_zy_plasma_ethcd_1.1531.1531.3	controllerType=0 controllerNumber=1 scan=1531	7.0241
01070:3	23	R.HN[+2569.905]STGC[+57.021]LR.M	HexNAc(5)Hex(6)NeuAc(2)	C[+57], N[+2570]	1172.11	3	3514.33	3514.34	0	-3.2	290	Specific	310.42	80.7	80.7	4.37	17	>sp|P10909|CLUS_HUMAN Clusterin OS=Homo sapiens OX=9606 GN=CLU PE=1 SV=1	6125	20210911_zy_plasma_ethcd_1.1185.1185.3	controllerType=0 controllerNumber=1 scan=1185	5.4876
01342:3	16	K.TKPREEQFN[+1444.534]STYR.V	HexNAc(4)Hex(3)Fuc(1)	N[+1445]	1034.12	3	3100.34	3100.35	0	-2.9	169	Specific	310.86	86.23	86.23	6.03	25	>sp|P01861|IGHG4_HUMAN Immunoglobulin heavy constant gamma 4 OS=Homo sapiens OX=9606 GN=IGHG4 PE=1 SV=1	12793	20210911_zy_plasma_ethcd_1.1483.1483.3	controllerType=0 controllerNumber=1 scan=1483	6.8111
05319:4	1	K.NLFLN[+2278.809]HSEN[+2861.000]ATAK.D	HexNAc(5)Hex(6)NeuAc(1),HexNAc(5)Hex(6)NeuAc(3)	N[+2279][+2861]	1650.39	4	6598.54	6598.54	0	-0.6	203	Specific	311.92	311.92	8.25	5.64	163	>sp|P00738|HPT_HUMAN Haptoglobin OS=Homo sapiens OX=9606 GN=HP PE=1 SV=1	3044	20210911_zy_plasma_ethcd_1.5837.5837.4	controllerType=0 controllerNumber=1 scan=5837	26.0554
03837:3	28	K.QSVPAHFVALN[+1710.598]GSK.L	HexNAc(3)Hex(5)NeuAc(1)	N[+1711]	1055.79	3	3165.36	3165.37	0	-3.3	611	Specific	312.07	149.84	149.84	5.98	6	>sp|P06681|CO2_HUMAN Complement C2 OS=Homo sapiens OX=9606 GN=C2 PE=1 SV=2	8379	20210911_zy_plasma_ethcd_1.4214.4214.3	controllerType=0 controllerNumber=1 scan=4214	18.819
09609:3	10	K.C[+57.021]GLVPVLAENYN[+2278.809]K.S	HexNAc(5)Hex(6)NeuAc(1)	C[+57], N[+2279]	1252.52	3	3755.55	3755.56	0	-1.7	421	Specific	312.37	151.21	151.21	6.13	25	>sp|TRFE_HUMAN|(Common contaminant protein)	20484	20210911_zy_plasma_ethcd_1.10538.10538.3	controllerType=0 controllerNumber=1 scan=10538	47.0873
04150:3	17	K.LGN[+2204.772]WSAM[+15.995]PSC[+57.021]K.A	HexNAc(4)Hex(5)NeuAc(2)	C[+57], M[+16], N[+2205]	1157.78	3	3471.33	3471.33	0	-2.1	251	Specific	312.45	157.77	157.77	5.69	22	>sp|P02749|APOH_HUMAN Beta-2-glycoprotein 1 OS=Homo sapiens OX=9606 GN=APOH PE=1 SV=3	19971	20210911_zy_plasma_ethcd_1.4557.4557.3	controllerType=0 controllerNumber=1 scan=4557	20.347
15108:3	57	K.YTGN[+2861.000]ASALFILPDQDK.M	HexNAc(5)Hex(6)NeuAc(3)	N[+2861]	1538.63	3	4613.87	4613.88	0	-2.1	268	Specific	312.86	196.95	196.95	6.08	5	>sp|P01011|AACT_HUMAN Alpha-1-antichymotrypsin OS=Homo sapiens OX=9606 GN=SERPINA3 PE=1 SV=2	8788	20210911_zy_plasma_ethcd_1.16563.16563.3	controllerType=0 controllerNumber=1 scan=16563	74.0591
02110:3	13	R.ISEEN[+1913.677]ETTC[+57.021]YM[+15.995]GK.W	HexNAc(4)Hex(5)NeuAc(1)	C[+57], M[+16], N[+1914]	1164.44	3	3491.32	3491.32	0	-2.3	907	Specific	313.22	161.03	161.03	6.12	16	>sp|P08603|CFAH_HUMAN Complement factor H OS=Homo sapiens OX=9606 GN=CFH PE=1 SV=4	385	20210911_zy_plasma_ethcd_1.2322.2322.3	controllerType=0 controllerNumber=1 scan=2322	10.4139
13245:3	21	K.VC[+57.021]QDC[+57.021]PLLAPLN[+2204.772]DTR.V	HexNAc(4)Hex(5)NeuAc(2)	C[+57]*2, N[+2205]	1326.21	3	3976.61	3976.62	0	-2	145	Specific	313.35	212.97	212.97	6.19	12	>sp|P02765|FETUA_HUMAN Alpha-2-HS-glycoprotein OS=Homo sapiens OX=9606 GN=AHSG PE=1 SV=2	4627	20210911_zy_plasma_ethcd_1.14524.14524.2	controllerType=0 controllerNumber=1 scan=14524	65.0239
01094:2	2	K.N[+1038.375]NSDISSTR.G	HexNAc(2)Hex(3)Fuc(1)	N[+1038]	1016.42	2	2031.83	2031.83	0	-1.2	46	Specific	313.45	207.44	207.44	5.61	55	>sp|P01871|IGHM_HUMAN Immunoglobulin heavy constant mu OS=Homo sapiens OX=9606 GN=IGHM PE=1 SV=4	10127	20210911_zy_plasma_ethcd_1.1211.1211.3	controllerType=0 controllerNumber=1 scan=1211	5.6101
01173:3	2	K.N[+2100.761]NSDISSTR.G	HexNAc(5)Hex(4)Fuc(1)NeuAc(1)	N[+2101]	1032.08	3	3094.21	3094.22	0	-2.7	46	Specific	314.68	121.15	121.15	5.82	55	>sp|P01871|IGHM_HUMAN Immunoglobulin heavy constant mu OS=Homo sapiens OX=9606 GN=IGHM PE=1 SV=4	10127	20210911_zy_plasma_ethcd_1.1298.1298.3	controllerType=0 controllerNumber=1 scan=1298	5.9891
01397:3	11	R.NGTGHGN[+2204.772]STHHGPEYMR.C	HexNAc(4)Hex(5)NeuAc(2)	N[+2205]	1353.19	3	4057.54	4056.57	1	-6.1	240	Specific	314.92	162.19	60.49	6.2	28	>sp|P02790|HEMO_HUMAN Hemopexin OS=Homo sapiens OX=9606 GN=HPX PE=1 SV=2	9336	20210911_zy_plasma_ethcd_1.1543.1543.3	controllerType=0 controllerNumber=1 scan=1543	7.0789
09413:3	9	K.TVLTPATNHMGN[+1540.529]VTFTIPANR.E	HexNAc(2)Hex(7)	N[+1541]	1265.9	3	3795.68	3795.69	0	-1.1	74	Specific	315.46	220.02	220.02	6.15	22	>sp|P01024|CO3_HUMAN Complement C3 OS=Homo sapiens OX=9606 GN=C3 PE=1 SV=2	731	20210911_zy_plasma_ethcd_1.10323.10323.3	controllerType=0 controllerNumber=1 scan=10323	46.1137
01904:3	22	R.EEQYN[+1971.719]STFR.V	HexNAc(5)Hex(5)Fuc(1)	N[+1972]	1049.08	3	3145.23	3145.24	0	-2.7	223	Specific	315.82	17.61	17.61	3.43	16	>sp|P01860|IGHG3_HUMAN Immunoglobulin heavy constant gamma 3 OS=Homo sapiens OX=9606 GN=IGHG3 PE=1 SV=2	2742	20210911_zy_plasma_ethcd_1.2097.2097.3	controllerType=0 controllerNumber=1 scan=2097	9.4483
02059:3	12	R.EN[+2861.000]GTISR.Y	HexNAc(5)Hex(6)NeuAc(3)	N[+2861]	1213.13	3	3637.38	3637.39	0	-2.4	102	Specific	316.17	32.21	32.21	3.84	28	>sp|P02763|A1AG1_HUMAN Alpha-1-acid glycoprotein 1 OS=Homo sapiens OX=9606 GN=ORM1 PE=1 SV=1	2208	20210911_zy_plasma_ethcd_1.2266.2266.3	controllerType=0 controllerNumber=1 scan=2266	10.16
09691:3	10	K.C[+57.021]GLVPVLAENYN[+2075.730]K.S	HexNAc(4)Hex(6)NeuAc(1)	C[+57], N[+2076]	1184.83	3	3552.48	3552.48	0	-0.1	421	Specific	316.5	183.84	183.84	5.28	25	>sp|TRFE_HUMAN|(Common contaminant protein)	20484	20210911_zy_plasma_ethcd_1.10628.10628.3	controllerType=0 controllerNumber=1 scan=10628	47.502
02047:3	7	K.PREEQFN[+1809.666]STFR.V	HexNAc(5)Hex(4)Fuc(1)	N[+1810]	1074.12	3	3220.34	3220.34	0	-1.8	170	Specific	316.73	198.76	198.76	5.25	35	>sp|P01859|IGHG2_HUMAN Immunoglobulin heavy constant gamma 2 OS=Homo sapiens OX=9606 GN=IGHG2 PE=1 SV=2	2858	20210911_zy_plasma_ethcd_1.2253.2253.3	controllerType=0 controllerNumber=1 scan=2253	10.1063
06662:3	2	R.GLTFQQN[+2407.852]ASSMC[+57.021]VPDQDTAIR.V	HexNAc(5)Hex(5)NeuAc(2)	C[+57], N[+2408]	1582.98	3	4746.92	4746.93	0	-1.1	203	Specific	316.86	147.05	28.56	6.5	55	>sp|P01871|IGHM_HUMAN Immunoglobulin heavy constant mu OS=Homo sapiens OX=9606 GN=IGHM PE=1 SV=4	10127	20210911_zy_plasma_ethcd_1.7307.7307.3	controllerType=0 controllerNumber=1 scan=7307	32.5285
00881:3	2	K.N[+1809.666]NSDISSTR.G	HexNAc(5)Hex(4)Fuc(1)	N[+1810]	935.045	3	2803.12	2803.13	0	-2.2	46	Specific	317.64	169.88	169.88	5.02	55	>sp|P01871|IGHM_HUMAN Immunoglobulin heavy constant mu OS=Homo sapiens OX=9606 GN=IGHM PE=1 SV=4	10127	20210911_zy_plasma_ethcd_1.978.978.3	controllerType=0 controllerNumber=1 scan=978	4.5624
10376:3	29	R.IIVPLNNREN[+2059.735]ISDPTSPLR.T	HexNAc(4)Hex(5)Fuc(1)NeuAc(1)	N[+2060]	1403.31	3	4207.9	4207.91	0	-2.2	62	Specific	318.28	210.45	210.45	5.65	13	>sp|P01591|IGJ_HUMAN Immunoglobulin J chain OS=Homo sapiens OX=9606 GN=JCHAIN PE=1 SV=4	4401	20210911_zy_plasma_ethcd_1.11380.11380.3	controllerType=0 controllerNumber=1 scan=11380	50.9102
08032:3	15	K.YNSQN[+2204.772]QSNNQFVLYR.I	HexNAc(4)Hex(5)NeuAc(2)	N[+2205]	1360.55	3	4079.64	4079.65	0	-2	44	Specific	318.7	126.04	126.04	6.23	23	>sp|P01042|KNG1_HUMAN Kininogen-1 OS=Homo sapiens OX=9606 GN=KNG1 PE=1 SV=2	6533	20210911_zy_plasma_ethcd_1.8806.8806.3	controllerType=0 controllerNumber=1 scan=8806	39.1627
01278:3	22	K.TKPREEQYN[+1444.534]STFR.V	HexNAc(4)Hex(3)Fuc(1)	N[+1445]	1034.12	3	3100.34	3100.35	0	-2.5	219	Specific	318.73	68.18	68.18	6.18	16	>sp|P01860|IGHG3_HUMAN Immunoglobulin heavy constant gamma 3 OS=Homo sapiens OX=9606 GN=IGHG3 PE=1 SV=2	2742	20210911_zy_plasma_ethcd_1.1413.1413.3	controllerType=0 controllerNumber=1 scan=1413	6.5028
10636:4	2	R.GLTFQQN[+2262.814]ASSMC[+57.021]VPDQDTAIR.V	HexNAc(5)Hex(5)Fuc(1)NeuAc(1)	C[+57], N[+2263]	1151.23	4	4601.88	4601.89	0	-1.5	203	Specific	319.31	204.09	110.33	6.49	55	>sp|P01871|IGHM_HUMAN Immunoglobulin heavy constant mu OS=Homo sapiens OX=9606 GN=IGHM PE=1 SV=4	10127	20210911_zy_plasma_ethcd_1.11664.11664.3	controllerType=0 controllerNumber=1 scan=11664	52.1822
08051:3	33	R.ADGTVNQIEGEATPVN[+1768.640]LTEPAK.L	HexNAc(4)Hex(5)Fuc(1)	N[+1769]	1341.59	3	4022.76	4022.76	0	0.3	83	Specific	319.67	219.35	219.35	5.26	5	>sp|P05090|APOD_HUMAN Apolipoprotein D OS=Homo sapiens OX=9606 GN=APOD PE=1 SV=1	120	20210911_zy_plasma_ethcd_1.8827.8827.3	controllerType=0 controllerNumber=1 scan=8827	39.2586
12292:3	3	K.YRGTAGNALMDGASQLMGEN[+2204.772]R.T	HexNAc(4)Hex(5)NeuAc(2)	N[+2205]	1472.93	3	4416.79	4416.8	0	-2.2	375	Specific	320.41	252.88	252.88	6.78	38	>sp|P02675|FIBB_HUMAN Fibrinogen beta chain OS=Homo sapiens OX=9606 GN=FGB PE=1 SV=2	6006	20210911_zy_plasma_ethcd_1.13482.13482.3	controllerType=0 controllerNumber=1 scan=13482	60.4078
01631:3	22	K.PREEQYN[+1444.534]STFR.V	HexNAc(4)Hex(3)Fuc(1)	N[+1445]	957.736	3	2871.19	2871.2	0	-3.5	221	Specific	321.26	71.1	71.1	4.97	16	>sp|P01860|IGHG3_HUMAN Immunoglobulin heavy constant gamma 3 OS=Homo sapiens OX=9606 GN=IGHG3 PE=1 SV=2	2742	20210911_zy_plasma_ethcd_1.1799.1799.3	controllerType=0 controllerNumber=1 scan=1799	8.1706
01768:3	7	K.TKPREEQFN[+1809.666]STFR.V	HexNAc(5)Hex(4)Fuc(1)	N[+1810]	1150.5	3	3449.47	3449.48	0	-3.6	168	Specific	321.33	189.17	189.17	5.93	35	>sp|P01859|IGHG2_HUMAN Immunoglobulin heavy constant gamma 2 OS=Homo sapiens OX=9606 GN=IGHG2 PE=1 SV=2	2858	20210911_zy_plasma_ethcd_1.1949.1949.3	controllerType=0 controllerNumber=1 scan=1949	8.8325
03286:3	7	R.EEQFN[+1897.682]STFR.V	HexNAc(4)Hex(4)Fuc(1)NeuAc(1)	N[+1898]	1019.07	3	3055.19	3055.2	0	-3.2	172	Specific	321.49	162.09	162.09	5.5	35	>sp|P01859|IGHG2_HUMAN Immunoglobulin heavy constant gamma 2 OS=Homo sapiens OX=9606 GN=IGHG2 PE=1 SV=2	2858	20210911_zy_plasma_ethcd_1.3610.3610.3	controllerType=0 controllerNumber=1 scan=3610	16.1258
02996:3	6	K.TPLTAN[+2100.761]ITK.S	HexNAc(5)Hex(4)Fuc(1)NeuAc(1)	N[+2101]	1020.44	3	3059.31	3059.32	0	-2.8	200	Specific	322.85	135	135	5.85	32	>sp|P01877|IGHA2_HUMAN Immunoglobulin heavy constant alpha 2 OS=Homo sapiens OX=9606 GN=IGHA2 PE=1 SV=4	10403	20210911_zy_plasma_ethcd_1.3293.3293.3	controllerType=0 controllerNumber=1 scan=3293	14.7052
01630:3	2	K.N[+2350.830]NSDISSTR.G	HexNAc(4)Hex(5)Fuc(1)NeuAc(2)	N[+2351]	1115.43	3	3344.28	3344.29	0	-3.4	46	Specific	323.88	155.18	155.18	5.51	55	>sp|P01871|IGHM_HUMAN Immunoglobulin heavy constant mu OS=Homo sapiens OX=9606 GN=IGHM PE=1 SV=4	10127	20210911_zy_plasma_ethcd_1.1798.1798.3	controllerType=0 controllerNumber=1 scan=1798	8.1674
12230:4	18	R.QNQC[+57.021]FYN[+3007.058]SSYLNVQR.E	HexNAc(5)Hex(6)Fuc(1)NeuAc(3)	C[+57], N[+3007]	1232.73	4	4927.91	4927.92	0	-2.4	87	Specific	324.11	185.49	185.49	6.03	17	>sp|P19652|A1AG2_HUMAN Alpha-1-acid glycoprotein 2 OS=Homo sapiens OX=9606 GN=ORM2 PE=1 SV=2	4531	20210911_zy_plasma_ethcd_1.13414.13414.4	controllerType=0 controllerNumber=1 scan=13414	60.1048
01109:2	2	K.N[+876.322]NSDISSTR.G	HexNAc(2)Hex(2)Fuc(1)	N[+876]	935.393	2	1869.78	1869.78	0	-1.5	46	Specific	324.71	213.23	213.23	5.36	55	>sp|P01871|IGHM_HUMAN Immunoglobulin heavy constant mu OS=Homo sapiens OX=9606 GN=IGHM PE=1 SV=4	10127	20210911_zy_plasma_ethcd_1.1227.1227.2	controllerType=0 controllerNumber=1 scan=1227	5.6803
10668:3	2	R.GLTFQQN[+2262.814]ASSMC[+57.021]VPDQDTAIR.V	HexNAc(5)Hex(5)Fuc(1)NeuAc(1)	C[+57], N[+2263]	1534.63	3	4601.88	4601.89	0	-2.5	203	Specific	324.74	211.98	45.58	6.84	55	>sp|P01871|IGHM_HUMAN Immunoglobulin heavy constant mu OS=Homo sapiens OX=9606 GN=IGHM PE=1 SV=4	10127	20210911_zy_plasma_ethcd_1.11700.11700.3	controllerType=0 controllerNumber=1 scan=11700	52.3423
13365:3	1	K.VVLHPN[+2221.788]YSQVDIGLIK.L	HexNAc(4)Hex(6)Fuc(1)NeuAc(1)	N[+2222]	1339.27	3	4015.8	4016.8	-1	0.5	236	Specific	326.53	265.31	265.31	5.41	163	>sp|P00738|HPT_HUMAN Haptoglobin OS=Homo sapiens OX=9606 GN=HP PE=1 SV=1	3044	20210911_zy_plasma_ethcd_1.14655.14655.3	controllerType=0 controllerNumber=1 scan=14655	65.5987
11022:3	3	R.GTAGNALMDGASQLMGEN[+2204.772]R.T	HexNAc(4)Hex(5)NeuAc(2)	N[+2205]	1366.55	3	4097.62	4097.63	0	-2.4	377	Specific	327.67	186.15	186.15	6.31	38	>sp|P02675|FIBB_HUMAN Fibrinogen beta chain OS=Homo sapiens OX=9606 GN=FGB PE=1 SV=2	6006	20210911_zy_plasma_ethcd_1.12088.12088.3	controllerType=0 controllerNumber=1 scan=12088	54.0941
01258:3	22	K.TKPREEQYN[+1768.640]STFR.V	HexNAc(4)Hex(5)Fuc(1)	N[+1769]	1142.15	3	3424.44	3424.45	0	-3.2	219	Specific	327.74	81.65	81.65	5.68	16	>sp|P01860|IGHG3_HUMAN Immunoglobulin heavy constant gamma 3 OS=Homo sapiens OX=9606 GN=IGHG3 PE=1 SV=2	2742	20210911_zy_plasma_ethcd_1.1391.1391.3	controllerType=0 controllerNumber=1 scan=1391	6.407
05538:4	1	K.NLFLN[+2204.772]HSEN[+2569.905]ATAK.D	HexNAc(4)Hex(5)NeuAc(2),HexNAc(5)Hex(6)NeuAc(2)	N[+2205][+2570]	1559.11	4	6233.4	6233.41	0	-1.2	203	Specific	328.48	328.48	3.16	6.15	163	>sp|P00738|HPT_HUMAN Haptoglobin OS=Homo sapiens OX=9606 GN=HP PE=1 SV=1	3044	20210911_zy_plasma_ethcd_1.6077.6077.4	controllerType=0 controllerNumber=1 scan=6077	27.1099
09670:3	15	K.LNAENN[+2204.772]ATFYFK.I	HexNAc(4)Hex(5)NeuAc(2)	N[+2205]	1212.82	3	3636.45	3636.46	0	-2.3	289	Specific	328.96	173.47	173.47	6.16	23	>sp|P01042|KNG1_HUMAN Kininogen-1 OS=Homo sapiens OX=9606 GN=KNG1 PE=1 SV=2	6533	20210911_zy_plasma_ethcd_1.10605.10605.3	controllerType=0 controllerNumber=1 scan=10605	47.3978
07631:3	3	K.YRGTAGNALMDGASQLM[+15.995]GEN[+2204.772]R.T	HexNAc(4)Hex(5)NeuAc(2)	M[+16], N[+2205]	1478.27	3	4432.78	4432.79	0	-2.1	375	Specific	330.21	254.61	92.62	6.78	38	>sp|P02675|FIBB_HUMAN Fibrinogen beta chain OS=Homo sapiens OX=9606 GN=FGB PE=1 SV=2	6006	20210911_zy_plasma_ethcd_1.8367.8367.3	controllerType=0 controllerNumber=1 scan=8367	37.2064
09987:3	36	K.N[+2204.772]LSM[+15.995]PLLPADFHK.E	HexNAc(4)Hex(5)NeuAc(2)	M[+16], N[+2205]	1235.18	3	3703.53	3703.54	0	-3.2	49	Specific	330.64	179.08	179.08	6.02	6	>sp|P05546|HEP2_HUMAN Heparin cofactor 2 OS=Homo sapiens OX=9606 GN=SERPIND1 PE=1 SV=3	4741	20210911_zy_plasma_ethcd_1.10953.10953.3	controllerType=0 controllerNumber=1 scan=10953	48.9663
01121:3	5	K.PREEQYN[+1622.582]STYR.V	HexNAc(4)Hex(5)	N[+1623]	1022.42	3	3065.24	3065.25	0	-2.7	293	Specific	330.85	178.63	178.63	5.64	45	>sp|P0DOX5|IGG1_HUMAN Immunoglobulin gamma-1 heavy chain OS=Homo sapiens OX=9606 PE=1 SV=2	10252	20210911_zy_plasma_ethcd_1.1241.1241.3	controllerType=0 controllerNumber=1 scan=1241	5.7393
02256:3	62	R.GTAN[+2204.772]TTTAGVPC[+57.021]QR.W	HexNAc(4)Hex(5)NeuAc(2)	C[+57], N[+2205]	1213.49	3	3638.44	3638.45	0	-2.2	293	Specific	331.85	174.76	174.76	6.12	1	>sp|P26927|HGFL_HUMAN Hepatocyte growth factor-like protein OS=Homo sapiens OX=9606 GN=MST1 PE=1 SV=2	10058	20210911_zy_plasma_ethcd_1.2482.2482.3	controllerType=0 controllerNumber=1 scan=2482	11.126
07195:4	1	K.NLFLN[+3226.132]HSEN[+2204.772]ATAK.D	HexNAc(6)Hex(7)NeuAc(3),HexNAc(4)Hex(5)NeuAc(2)	N[+2205][+3226]	1722.91	4	6888.63	6889.64	-1	-0.7	203	Specific	331.98	196.63	5.83	5.7	163	>sp|P00738|HPT_HUMAN Haptoglobin OS=Homo sapiens OX=9606 GN=HP PE=1 SV=1	3044	20210911_zy_plasma_ethcd_1.7890.7890.4	controllerType=0 controllerNumber=1 scan=7890	35.1033
00903:3	5	K.TKPREEQYN[+1622.582]STYR.V	HexNAc(4)Hex(5)	N[+1623]	1098.8	3	3294.38	3294.39	0	-2.5	291	Specific	332.66	189.66	189.66	5.93	45	>sp|P0DOX5|IGG1_HUMAN Immunoglobulin gamma-1 heavy chain OS=Homo sapiens OX=9606 PE=1 SV=2	10252	20210911_zy_plasma_ethcd_1.1002.1002.3	controllerType=0 controllerNumber=1 scan=1002	4.6695
10594:3	21	K.VC[+57.021]QDC[+57.021]PLLAPLN[+1913.677]DTR.V	HexNAc(4)Hex(5)NeuAc(1)	C[+57]*2, N[+1914]	1229.18	3	3685.52	3685.52	0	-2.3	145	Specific	333.8	199.34	199.34	6.12	12	>sp|P02765|FETUA_HUMAN Alpha-2-HS-glycoprotein OS=Homo sapiens OX=9606 GN=AHSG PE=1 SV=2	4627	20210911_zy_plasma_ethcd_1.11619.11619.3	controllerType=0 controllerNumber=1 scan=11619	51.9808
00902:3	5	K.TKPREEQYN[+1460.529]STYR.V	HexNAc(4)Hex(4)	N[+1461]	1044.78	3	3132.33	3132.34	0	-3.1	291	Specific	333.96	196.43	196.43	5.72	45	>sp|P0DOX5|IGG1_HUMAN Immunoglobulin gamma-1 heavy chain OS=Homo sapiens OX=9606 PE=1 SV=2	10252	20210911_zy_plasma_ethcd_1.1001.1001.3	controllerType=0 controllerNumber=1 scan=1001	4.6643
01275:3	22	K.TKPREEQYN[+1444.534]STFR.V	HexNAc(4)Hex(3)Fuc(1)	N[+1445]	1034.12	3	3100.34	3100.35	0	-2.9	219	Specific	333.98	87.46	87.46	6.03	16	>sp|P01860|IGHG3_HUMAN Immunoglobulin heavy constant gamma 3 OS=Homo sapiens OX=9606 GN=IGHG3 PE=1 SV=2	2742	20210911_zy_plasma_ethcd_1.1409.1409.3	controllerType=0 controllerNumber=1 scan=1409	6.4869
12143:3	3	R.GTAGNALMDGASQLMGEN[+1913.677]R.T	HexNAc(4)Hex(5)NeuAc(1)	N[+1914]	1269.51	3	3806.52	3806.54	0	-3	377	Specific	334.56	205.56	82.18	6.21	38	>sp|P02675|FIBB_HUMAN Fibrinogen beta chain OS=Homo sapiens OX=9606 GN=FGB PE=1 SV=2	6006	20210911_zy_plasma_ethcd_1.13318.13318.3	controllerType=0 controllerNumber=1 scan=13318	59.6763
12476:3	12	R.QDQC[+57.021]IYN[+3226.132]TTYLNVQR.E	HexNAc(6)Hex(7)NeuAc(3)	C[+57], N[+3226]	1714.68	3	5142.02	5142.03	0	-2	87	Specific	334.6	182.22	182.22	6.1	28	>sp|P02763|A1AG1_HUMAN Alpha-1-acid glycoprotein 1 OS=Homo sapiens OX=9606 GN=ORM1 PE=1 SV=1	2208	20210911_zy_plasma_ethcd_1.13683.13683.3	controllerType=0 controllerNumber=1 scan=13683	61.2985
10342:3	12	R.QDQC[+57.021]IYN[+2569.905]TTYLNVQR.E	HexNAc(5)Hex(6)NeuAc(2)	C[+57], N[+2570]	1495.6	3	4484.79	4485.8	-1	-1.6	87	Specific	334.99	211.94	211.94	6.28	28	>sp|P02763|A1AG1_HUMAN Alpha-1-acid glycoprotein 1 OS=Homo sapiens OX=9606 GN=ORM1 PE=1 SV=1	2208	20210911_zy_plasma_ethcd_1.11342.11342.3	controllerType=0 controllerNumber=1 scan=11342	50.7421
02448:3	17	K.PSAGN[+2204.772]NSLYR.D	HexNAc(4)Hex(5)NeuAc(2)	N[+2205]	1095.1	3	3283.29	3283.3	0	-2.7	158	Specific	335.79	111.04	111.04	5.71	22	>sp|P02749|APOH_HUMAN Beta-2-glycoprotein 1 OS=Homo sapiens OX=9606 GN=APOH PE=1 SV=3	19971	20210911_zy_plasma_ethcd_1.2693.2693.3	controllerType=0 controllerNumber=1 scan=2693	12.0547
02964:3	34	R.FGC[+57.021]EIENN[+2204.772]R.S	HexNAc(4)Hex(5)NeuAc(2)	C[+57], N[+2205]	1115.09	3	3343.26	3343.27	0	-3	121	Specific	336.15	153.3	153.3	5.51	4	>sp|P25311|ZA2G_HUMAN Zinc-alpha-2-glycoprotein OS=Homo sapiens OX=9606 GN=AZGP1 PE=1 SV=2	18783	20210911_zy_plasma_ethcd_1.3258.3258.3	controllerType=0 controllerNumber=1 scan=3258	14.5552
00923:3	5	K.TKPREEQYN[+1403.507]STYR.V	HexNAc(3)Hex(4)Fuc(1)	N[+1404]	1025.77	3	3075.31	3075.32	0	-2.1	291	Specific	336.33	75.35	75.35	5.74	45	>sp|P0DOX5|IGG1_HUMAN Immunoglobulin gamma-1 heavy chain OS=Homo sapiens OX=9606 PE=1 SV=2	10252	20210911_zy_plasma_ethcd_1.1024.1024.3	controllerType=0 controllerNumber=1 scan=1024	4.7688
10432:3	44	K.EGYSN[+2204.772]ISYIVVNHQGISSR.L	HexNAc(4)Hex(5)NeuAc(2)	N[+2205]	1443.28	3	4327.82	4327.82	0	-1.2	79	Specific	336.76	214.59	214.59	6.25	2	>sp|P49908|SEPP1_HUMAN Selenoprotein P OS=Homo sapiens OX=9606 GN=SELENOP PE=1 SV=3	16703	20210911_zy_plasma_ethcd_1.11441.11441.3	controllerType=0 controllerNumber=1 scan=11441	51.1823
03387:4	19	R.SRYPHKPEIN[+1913.677]STTHPGADLQENFC[+57.021]R.N	HexNAc(4)Hex(5)NeuAc(1)	C[+57], N[+1914]	1218.02	4	4869.05	4868.07	1	-4.8	134	Specific	337.97	237.98	237.98	5.05	7	>sp|P00734|THRB_HUMAN Prothrombin OS=Homo sapiens OX=9606 GN=F2 PE=1 SV=2	18404	20210911_zy_plasma_ethcd_1.3721.3721.4	controllerType=0 controllerNumber=1 scan=3721	16.6219
01684:3	16	K.PREEQFN[+1971.719]STYR.V	HexNAc(5)Hex(5)Fuc(1)	N[+1972]	1133.46	3	3398.37	3398.39	0	-5.9	171	Specific	338.03	88.64	88.64	5.1	25	>sp|P01861|IGHG4_HUMAN Immunoglobulin heavy constant gamma 4 OS=Homo sapiens OX=9606 GN=IGHG4 PE=1 SV=1	12793	20210911_zy_plasma_ethcd_1.1857.1857.3	controllerType=0 controllerNumber=1 scan=1857	8.4287
01731:3	7	K.TKPREEQFN[+1403.507]STFR.V	HexNAc(3)Hex(4)Fuc(1)	N[+1404]	1015.11	3	3043.32	3043.33	0	-2.6	168	Specific	339.63	193.42	193.42	5.91	35	>sp|P01859|IGHG2_HUMAN Immunoglobulin heavy constant gamma 2 OS=Homo sapiens OX=9606 GN=IGHG2 PE=1 SV=2	2858	20210911_zy_plasma_ethcd_1.1908.1908.3	controllerType=0 controllerNumber=1 scan=1908	8.6597
01860:2	16	R.EEQFN[+1768.640]STYR.V	HexNAc(4)Hex(5)Fuc(1)	N[+1769]	1471.58	2	2942.15	2942.16	0	-1.4	173	Specific	339.67	57.98	57.98	5.34	25	>sp|P01861|IGHG4_HUMAN Immunoglobulin heavy constant gamma 4 OS=Homo sapiens OX=9606 GN=IGHG4 PE=1 SV=1	12793	20210911_zy_plasma_ethcd_1.2049.2049.2	controllerType=0 controllerNumber=1 scan=2049	9.2442
13343:3	1	K.VVLHPN[+2715.963]YSQVDIGLIK.L	HexNAc(5)Hex(6)Fuc(1)NeuAc(2)	N[+2716]	1504.33	3	4510.97	4510.97	0	-1.6	236	Specific	340.11	230.74	230.74	5.83	163	>sp|P00738|HPT_HUMAN Haptoglobin OS=Homo sapiens OX=9606 GN=HP PE=1 SV=1	3044	20210911_zy_plasma_ethcd_1.14631.14631.3	controllerType=0 controllerNumber=1 scan=14631	65.4949
13727:4	3	R.GTAGNALMDGASQLMGEN[+2204.772]R.T	HexNAc(4)Hex(5)NeuAc(2)	N[+2205]	1025.16	4	4097.62	4097.63	0	-2.9	377	Specific	340.16	251.65	251.65	6.29	38	>sp|P02675|FIBB_HUMAN Fibrinogen beta chain OS=Homo sapiens OX=9606 GN=FGB PE=1 SV=2	6006	20210911_zy_plasma_ethcd_1.15052.15052.4	controllerType=0 controllerNumber=1 scan=15052	67.3667
00770:2	2	K.N[+1216.423]NSDISSTR.G	HexNAc(2)Hex(5)	N[+1216]	1105.44	2	2209.88	2209.88	0	-2.5	46	Specific	340.35	218.27	218.27	5.82	55	>sp|P01871|IGHM_HUMAN Immunoglobulin heavy constant mu OS=Homo sapiens OX=9606 GN=IGHM PE=1 SV=4	10127	20210911_zy_plasma_ethcd_1.856.856.2	controllerType=0 controllerNumber=1 scan=856	4.0112
07354:3	17	K.LGN[+2204.772]WSAMPSC[+57.021]K.A	HexNAc(4)Hex(5)NeuAc(2)	C[+57], N[+2205]	1152.45	3	3455.33	3455.34	0	-2.3	251	Specific	340.76	181.14	181.14	5.64	22	>sp|P02749|APOH_HUMAN Beta-2-glycoprotein 1 OS=Homo sapiens OX=9606 GN=APOH PE=1 SV=3	19971	20210911_zy_plasma_ethcd_1.8064.8064.3	controllerType=0 controllerNumber=1 scan=8064	35.8697
07366:3	3	K.YRGTAGNALMDGASQLMGEN[+1913.677]R.T	HexNAc(4)Hex(5)NeuAc(1)	N[+1914]	1375.91	3	4125.7	4125.7	0	0.3	375	Specific	341.07	249.83	69.42	5.6	38	>sp|P02675|FIBB_HUMAN Fibrinogen beta chain OS=Homo sapiens OX=9606 GN=FGB PE=1 SV=2	6006	20210911_zy_plasma_ethcd_1.8077.8077.3	controllerType=0 controllerNumber=1 scan=8077	35.927
00922:3	5	K.TKPREEQYN[+1444.534]STYR.V	HexNAc(4)Hex(3)Fuc(1)	N[+1445]	1039.45	3	3116.33	3116.34	0	-3.1	291	Specific	341.81	82.33	82.33	5.64	45	>sp|P0DOX5|IGG1_HUMAN Immunoglobulin gamma-1 heavy chain OS=Homo sapiens OX=9606 PE=1 SV=2	10252	20210911_zy_plasma_ethcd_1.1023.1023.3	controllerType=0 controllerNumber=1 scan=1023	4.7665
09784:3	10	K.C[+57.021]GLVPVLAENYN[+1913.677]K.S	HexNAc(4)Hex(5)NeuAc(1)	C[+57], N[+1914]	1130.81	3	3390.42	3390.43	0	-3.1	421	Specific	342.3	197.17	197.17	5.88	25	>sp|TRFE_HUMAN|(Common contaminant protein)	20484	20210911_zy_plasma_ethcd_1.10730.10730.3	controllerType=0 controllerNumber=1 scan=10730	47.9639
11125:3	11	R.SWPAVGN[+2861.000]C[+57.021]SSALR.W	HexNAc(5)Hex(6)NeuAc(3)	C[+57], N[+2861]	1422.56	3	4265.66	4265.67	0	-1.4	181	Specific	342.53	155.18	155.18	5.87	28	>sp|P02790|HEMO_HUMAN Hemopexin OS=Homo sapiens OX=9606 GN=HPX PE=1 SV=2	9336	20210911_zy_plasma_ethcd_1.12201.12201.3	controllerType=0 controllerNumber=1 scan=12201	54.6015
01781:3	6	K.HYTN[+1768.640]SSQDVTVPC[+57.021]R.V	HexNAc(4)Hex(5)Fuc(1)	C[+57], N[+1769]	1144.8	3	3432.37	3432.39	0	-4.3	89	Specific	343.77	218.13	218.13	5.7	32	>sp|P01877|IGHA2_HUMAN Immunoglobulin heavy constant alpha 2 OS=Homo sapiens OX=9606 GN=IGHA2 PE=1 SV=4	10403	20210911_zy_plasma_ethcd_1.1963.1963.3	controllerType=0 controllerNumber=1 scan=1963	8.8944
01864:2	16	R.EEQFN[+1606.587]STYR.V	HexNAc(4)Hex(4)Fuc(1)	N[+1607]	1390.55	2	2780.1	2780.1	0	-1.5	173	Specific	344.71	30.17	30.17	4.77	25	>sp|P01861|IGHG4_HUMAN Immunoglobulin heavy constant gamma 4 OS=Homo sapiens OX=9606 GN=IGHG4 PE=1 SV=1	12793	20210911_zy_plasma_ethcd_1.2053.2053.2	controllerType=0 controllerNumber=1 scan=2053	9.2643
11722:3	1	K.VVLHPN[+1913.677]YSQVDIGLIK.L	HexNAc(4)Hex(5)NeuAc(1)	N[+1914]	1236.9	3	3708.68	3708.69	0	-1	236	Specific	345.32	172.08	172.08	5.41	163	>sp|P00738|HPT_HUMAN Haptoglobin OS=Homo sapiens OX=9606 GN=HP PE=1 SV=1	3044	20210911_zy_plasma_ethcd_1.12856.12856.3	controllerType=0 controllerNumber=1 scan=12856	57.5615
01136:3	5	K.PREEQYN[+1298.476]STYR.V	HexNAc(4)Hex(3)	N[+1298]	914.383	3	2741.13	2741.14	0	-2.7	293	Specific	345.68	196.77	196.77	5.57	45	>sp|P0DOX5|IGG1_HUMAN Immunoglobulin gamma-1 heavy chain OS=Homo sapiens OX=9606 PE=1 SV=2	10252	20210911_zy_plasma_ethcd_1.1257.1257.3	controllerType=0 controllerNumber=1 scan=1257	5.8099
05403:3	39	R.HFDVAHVSTAATSN[+1702.581]FSAVR.D	HexNAc(2)Hex(8)	N[+1703]	1240.54	3	3719.59	3719.57	0	5.5	2109	Specific	346.06	253.54	253.54	5.21	4	>sp|P01266|THYG_HUMAN Thyroglobulin OS=Homo sapiens OX=9606 GN=TG PE=1 SV=5	17152	20210911_zy_plasma_ethcd_1.5929.5929.3	controllerType=0 controllerNumber=1 scan=5929	26.456
03379:3	17	K.PSAGN[+2861.000]NSLYR.D	HexNAc(5)Hex(6)NeuAc(3)	N[+2861]	1313.85	3	3939.52	3939.53	0	-1.3	158	Specific	346.49	110.51	110.51	5.41	22	>sp|P02749|APOH_HUMAN Beta-2-glycoprotein 1 OS=Homo sapiens OX=9606 GN=APOH PE=1 SV=3	19971	20210911_zy_plasma_ethcd_1.3712.3712.3	controllerType=0 controllerNumber=1 scan=3712	16.5837
02358:2	7	R.EEQFN[+1403.507]STFR.V	HexNAc(3)Hex(4)Fuc(1)	N[+1404]	1281.01	2	2561.02	2561.03	0	-3	172	Specific	346.56	179.95	179.95	5.51	35	>sp|P01859|IGHG2_HUMAN Immunoglobulin heavy constant gamma 2 OS=Homo sapiens OX=9606 GN=IGHG2 PE=1 SV=2	2858	20210911_zy_plasma_ethcd_1.2594.2594.2	controllerType=0 controllerNumber=1 scan=2594	11.6255
03019:3	13	K.M[+15.995]DGASN[+2204.772]VTC[+57.021]INSR.W	HexNAc(4)Hex(5)NeuAc(2)	C[+57], M[+16], N[+2205]	1215.8	3	3645.39	3645.39	0	-2	1024	Specific	346.61	161.43	161.43	6.09	16	>sp|P08603|CFAH_HUMAN Complement factor H OS=Homo sapiens OX=9606 GN=CFH PE=1 SV=4	385	20210911_zy_plasma_ethcd_1.3318.3318.3	controllerType=0 controllerNumber=1 scan=3318	14.8138
12674:3	12	R.QDQC[+57.021]IYN[+3226.132]TTYLNVQR.E	HexNAc(6)Hex(7)NeuAc(3)	C[+57], N[+3226]	1714.35	3	5141.02	5142.03	-1	-0.3	87	Specific	346.74	209.16	209.16	5.62	28	>sp|P02763|A1AG1_HUMAN Alpha-1-acid glycoprotein 1 OS=Homo sapiens OX=9606 GN=ORM1 PE=1 SV=1	2208	20210911_zy_plasma_ethcd_1.13900.13900.3	controllerType=0 controllerNumber=1 scan=13900	62.2685
04195:3	9	K.TVLTPATNHM[+15.995]GN[+1419.502]VTFTIPANR.E	HexNAc(3)Hex(5)	M[+16], N[+1420]	1230.89	3	3690.65	3690.66	0	-2.2	74	Specific	347.12	265.22	265.22	6.39	22	>sp|P01024|CO3_HUMAN Complement C3 OS=Homo sapiens OX=9606 GN=C3 PE=1 SV=2	731	20210911_zy_plasma_ethcd_1.4606.4606.3	controllerType=0 controllerNumber=1 scan=4606	20.5589
07285:3	46	K.HAN[+2204.772]WTLTPLK.S	HexNAc(4)Hex(5)NeuAc(2)	N[+2205]	1129.14	3	3385.41	3385.42	0	-2.1	251	Specific	347.98	174	174	5.71	4	>sp|P27169|PON1_HUMAN Serum paraoxonase/arylesterase 1 OS=Homo sapiens OX=9606 GN=PON1 PE=1 SV=3	15463	20210911_zy_plasma_ethcd_1.7988.7988.3	controllerType=0 controllerNumber=1 scan=7988	35.5283
01068:3	2	K.N[+1913.677]NSDISSTR.G	HexNAc(4)Hex(5)NeuAc(1)	N[+1914]	969.714	3	2907.13	2907.14	0	-2.8	46	Specific	348.89	134.58	134.58	5.79	55	>sp|P01871|IGHM_HUMAN Immunoglobulin heavy constant mu OS=Homo sapiens OX=9606 GN=IGHM PE=1 SV=4	10127	20210911_zy_plasma_ethcd_1.1183.1183.3	controllerType=0 controllerNumber=1 scan=1183	5.4785
03041:3	34	R.FGC[+57.021]EIENN[+2204.772]R.S	HexNAc(4)Hex(5)NeuAc(2)	C[+57], N[+2205]	1115.09	3	3343.26	3343.27	0	-2.2	121	Specific	349.03	184.57	184.57	5.63	4	>sp|P25311|ZA2G_HUMAN Zinc-alpha-2-glycoprotein OS=Homo sapiens OX=9606 GN=AZGP1 PE=1 SV=2	18783	20210911_zy_plasma_ethcd_1.3342.3342.3	controllerType=0 controllerNumber=1 scan=3342	14.917
02429:3	7	R.EEQFN[+1809.666]STFR.V	HexNAc(5)Hex(4)Fuc(1)	N[+1810]	989.732	3	2967.18	2967.19	0	-2.6	172	Specific	349.36	162.64	162.64	5.66	35	>sp|P01859|IGHG2_HUMAN Immunoglobulin heavy constant gamma 2 OS=Homo sapiens OX=9606 GN=IGHG2 PE=1 SV=2	2858	20210911_zy_plasma_ethcd_1.2672.2672.3	controllerType=0 controllerNumber=1 scan=2672	11.9625
04165:3	9	K.TVLTPATNHM[+15.995]GN[+1581.555]VTFTIPANR.E	HexNAc(3)Hex(6)	M[+16], N[+1582]	1284.91	3	3852.7	3852.71	0	-1.8	74	Specific	349.42	284.07	284.07	6.4	22	>sp|P01024|CO3_HUMAN Complement C3 OS=Homo sapiens OX=9606 GN=C3 PE=1 SV=2	731	20210911_zy_plasma_ethcd_1.4573.4573.3	controllerType=0 controllerNumber=1 scan=4573	20.4166
11484:3	1	K.VVLHPN[+2075.730]YSQVDIGLIK.L	HexNAc(4)Hex(6)NeuAc(1)	N[+2076]	1290.92	3	3870.73	3870.74	0	-2.6	236	Specific	350.71	183.62	183.62	6.13	163	>sp|P00738|HPT_HUMAN Haptoglobin OS=Homo sapiens OX=9606 GN=HP PE=1 SV=1	3044	20210911_zy_plasma_ethcd_1.12595.12595.3	controllerType=0 controllerNumber=1 scan=12595	56.3777
03489:3	1	K.NLFLN[+2204.772]HSENATAK.D	HexNAc(4)Hex(5)NeuAc(2)	N[+2205]	1221.84	3	3663.5	3663.51	0	-2.6	203	Specific	351.74	209.44	107.53	6.27	163	>sp|P00738|HPT_HUMAN Haptoglobin OS=Homo sapiens OX=9606 GN=HP PE=1 SV=1	3044	20210911_zy_plasma_ethcd_1.3832.3832.3	controllerType=0 controllerNumber=1 scan=3832	17.1209
04002:3	13	R.ISEEN[+2204.772]ETTC[+57.021]YMGK.W	HexNAc(4)Hex(5)NeuAc(2)	C[+57], N[+2205]	1256.14	3	3766.41	3766.42	0	-2.7	907	Specific	352.09	244.68	244.68	6.21	16	>sp|P08603|CFAH_HUMAN Complement factor H OS=Homo sapiens OX=9606 GN=CFH PE=1 SV=4	385	20210911_zy_plasma_ethcd_1.4395.4395.3	controllerType=0 controllerNumber=1 scan=4395	19.6304
10430:3	19	K.N[+2204.772]FTENDLLVR.I	HexNAc(4)Hex(5)NeuAc(2)	N[+2205]	1142.47	3	3425.39	3425.4	0	-3.2	416	Specific	353.76	198.12	198.12	5.43	7	>sp|P00734|THRB_HUMAN Prothrombin OS=Homo sapiens OX=9606 GN=F2 PE=1 SV=2	18404	20210911_zy_plasma_ethcd_1.11439.11439.3	controllerType=0 controllerNumber=1 scan=11439	51.1717
13831:3	1	K.MVSHHN[+2204.772]LTTGATLINEQWLLTTAK.N	HexNAc(4)Hex(5)NeuAc(2)	N[+2205]	1628.72	3	4884.16	4884.16	0	-1.9	179	Specific	354.74	197.55	197.55	6.55	163	>sp|P00738|HPT_HUMAN Haptoglobin OS=Homo sapiens OX=9606 GN=HP PE=1 SV=1	3044	20210911_zy_plasma_ethcd_1.15166.15166.3	controllerType=0 controllerNumber=1 scan=15166	67.8811
02290:3	16	R.EEQFN[+2100.761]STYR.V	HexNAc(5)Hex(4)Fuc(1)NeuAc(1)	N[+2101]	1092.1	3	3274.27	3274.28	0	-2.5	173	Specific	355.02	106.48	106.48	5.65	25	>sp|P01861|IGHG4_HUMAN Immunoglobulin heavy constant gamma 4 OS=Homo sapiens OX=9606 GN=IGHG4 PE=1 SV=1	12793	20210911_zy_plasma_ethcd_1.2519.2519.3	controllerType=0 controllerNumber=1 scan=2519	11.2911
02011:3	7	K.TKPREEQFN[+1897.682]STFR.V	HexNAc(4)Hex(4)Fuc(1)NeuAc(1)	N[+1898]	1179.84	3	3537.49	3537.5	0	-2	168	Specific	355.16	185.89	185.89	6.13	35	>sp|P01859|IGHG2_HUMAN Immunoglobulin heavy constant gamma 2 OS=Homo sapiens OX=9606 GN=IGHG2 PE=1 SV=2	2858	20210911_zy_plasma_ethcd_1.2214.2214.3	controllerType=0 controllerNumber=1 scan=2214	9.9502
08910:3	3	R.GTAGNALMDGASQLMGEN[+1913.677]R.T	HexNAc(4)Hex(5)NeuAc(1)	N[+1914]	1269.51	3	3806.53	3806.54	0	-2.5	377	Specific	355.21	215.46	68.43	6.36	38	>sp|P02675|FIBB_HUMAN Fibrinogen beta chain OS=Homo sapiens OX=9606 GN=FGB PE=1 SV=2	6006	20210911_zy_plasma_ethcd_1.9770.9770.3	controllerType=0 controllerNumber=1 scan=9770	43.566
02441:4	59	K.RHEEGHMLN[+2204.772]C[+57.021]TC[+57.021]FGQGR.G	HexNAc(4)Hex(5)NeuAc(2)	C[+57]*2, N[+2205]	1074.17	4	4293.65	4293.66	0	-3.9	534	Specific	355.57	250.08	210.17	6.39	1	>sp|P02751|FINC_HUMAN Fibronectin OS=Homo sapiens OX=9606 GN=FN1 PE=1 SV=4	5465	20210911_zy_plasma_ethcd_1.2685.2685.4	controllerType=0 controllerNumber=1 scan=2685	12.0217
04143:4	13	K.IPC[+57.021]SQPPQIEHGTIN[+2350.830]SSR.S	HexNAc(4)Hex(5)Fuc(1)NeuAc(2)	C[+57], N[+2351]	1093.71	4	4371.82	4371.82	0	1.8	868	Specific	355.61	317.76	317.76	4.57	16	>sp|P08603|CFAH_HUMAN Complement factor H OS=Homo sapiens OX=9606 GN=CFH PE=1 SV=4	385	20210911_zy_plasma_ethcd_1.4549.4549.4	controllerType=0 controllerNumber=1 scan=4549	20.3153
00996:3	5	K.TKPREEQYN[+1971.719]STYR.V	HexNAc(5)Hex(5)Fuc(1)	N[+1972]	1215.18	3	3643.52	3643.53	0	-2.2	291	Specific	356.13	69.72	69.72	6.11	45	>sp|P0DOX5|IGG1_HUMAN Immunoglobulin gamma-1 heavy chain OS=Homo sapiens OX=9606 PE=1 SV=2	10252	20210911_zy_plasma_ethcd_1.1104.1104.3	controllerType=0 controllerNumber=1 scan=1104	5.1182
01225:3	5	K.TKPREEQYN[+1897.682]STYR.V	HexNAc(4)Hex(4)Fuc(1)NeuAc(1)	N[+1898]	1190.5	3	3569.48	3569.49	0	-2.2	291	Specific	356.23	54.5	54.5	5.97	45	>sp|P0DOX5|IGG1_HUMAN Immunoglobulin gamma-1 heavy chain OS=Homo sapiens OX=9606 PE=1 SV=2	10252	20210911_zy_plasma_ethcd_1.1355.1355.3	controllerType=0 controllerNumber=1 scan=1355	6.2436
03515:4	3	K.YRGTAGNALMDGASQLM[+15.995]GEN[+1954.704]R.T	HexNAc(5)Hex(4)NeuAc(1)	M[+16], N[+1955]	1046.43	4	4182.71	4182.72	0	-2.5	375	Specific	356.23	299.63	145.81	6.22	38	>sp|P02675|FIBB_HUMAN Fibrinogen beta chain OS=Homo sapiens OX=9606 GN=FGB PE=1 SV=2	6006	20210911_zy_plasma_ethcd_1.3861.3861.4	controllerType=0 controllerNumber=1 scan=3861	17.2498
13212:3	1	K.VVLHPN[+2935.037]YSQVDIGLIK.L	HexNAc(6)Hex(7)NeuAc(2)	N[+2935]	1577.35	3	4730.04	4730.05	0	-2	236	Specific	356.46	184.54	184.54	6.12	163	>sp|P00738|HPT_HUMAN Haptoglobin OS=Homo sapiens OX=9606 GN=HP PE=1 SV=1	3044	20210911_zy_plasma_ethcd_1.14488.14488.3	controllerType=0 controllerNumber=1 scan=14488	64.864
01387:3	22	K.TKPREEQYN[+1809.666]STFR.V	HexNAc(5)Hex(4)Fuc(1)	N[+1810]	1155.83	3	3465.47	3465.48	0	-3.4	219	Specific	356.95	98.39	98.39	5.92	16	>sp|P01860|IGHG3_HUMAN Immunoglobulin heavy constant gamma 3 OS=Homo sapiens OX=9606 GN=IGHG3 PE=1 SV=2	2742	20210911_zy_plasma_ethcd_1.1532.1532.3	controllerType=0 controllerNumber=1 scan=1532	7.0286
08186:3	9	K.TVLTPATNHM[+15.995]GN[+1872.651]VTFTIPANR.E	HexNAc(3)Hex(6)NeuAc(1)	M[+16], N[+1873]	1381.94	3	4143.8	4143.81	0	-1.6	74	Specific	357.71	190.62	190.62	6.51	22	>sp|P01024|CO3_HUMAN Complement C3 OS=Homo sapiens OX=9606 GN=C3 PE=1 SV=2	731	20210911_zy_plasma_ethcd_1.8975.8975.3	controllerType=0 controllerNumber=1 scan=8975	39.9263
08556:3	3	K.YRGTAGNALM[+15.995]DGASQLMGEN[+2204.772]R.T	HexNAc(4)Hex(5)NeuAc(2)	M[+16], N[+2205]	1478.27	3	4432.78	4432.79	0	-2.2	375	Specific	358.24	258.82	114.75	6.72	38	>sp|P02675|FIBB_HUMAN Fibrinogen beta chain OS=Homo sapiens OX=9606 GN=FGB PE=1 SV=2	6006	20210911_zy_plasma_ethcd_1.9381.9381.3	controllerType=0 controllerNumber=1 scan=9381	41.7609
02838:3	17	R.VYKPSAGN[+2569.905]NSLYR.D	HexNAc(5)Hex(6)NeuAc(2)	N[+2570]	1346.89	3	4038.65	4038.66	0	-1.4	155	Specific	360.23	183.84	183.84	6.05	22	>sp|P02749|APOH_HUMAN Beta-2-glycoprotein 1 OS=Homo sapiens OX=9606 GN=APOH PE=1 SV=3	19971	20210911_zy_plasma_ethcd_1.3120.3120.3	controllerType=0 controllerNumber=1 scan=3120	13.9501
01682:3	38	K.N[+2204.772]GTAVC[+57.021]ATNR.R	HexNAc(4)Hex(5)NeuAc(2)	C[+57], N[+2205]	1090.09	3	3268.26	3268.27	0	-3	70	Specific	360.95	170.27	170.27	5.58	3	>sp|P05156|CFAI_HUMAN Complement factor I OS=Homo sapiens OX=9606 GN=CFI PE=1 SV=2	8939	20210911_zy_plasma_ethcd_1.1855.1855.3	controllerType=0 controllerNumber=1 scan=1855	8.4198
01999:3	7	K.PREEQFN[+1606.587]STFR.V	HexNAc(4)Hex(4)Fuc(1)	N[+1607]	1006.42	3	3017.26	3017.26	0	-2.6	170	Specific	361.9	220.08	220.08	5.42	35	>sp|P01859|IGHG2_HUMAN Immunoglobulin heavy constant gamma 2 OS=Homo sapiens OX=9606 GN=IGHG2 PE=1 SV=2	2858	20210911_zy_plasma_ethcd_1.2201.2201.3	controllerType=0 controllerNumber=1 scan=2201	9.8984
10088:4	55	R.RNPPM[+15.995]GGNVVIFDTVITNQEEPYQN[+2059.735]HSGR.F	HexNAc(4)Hex(5)Fuc(1)NeuAc(1)	M[+16], N[+2060]	1337.08	4	5345.3	5345.31	0	-1.2	122	Specific	362.75	337.76	337.76	5.85	1	>sp|P02745|C1QA_HUMAN Complement C1q subcomponent subunit A OS=Homo sapiens OX=9606 GN=C1QA PE=1 SV=2	3774	20210911_zy_plasma_ethcd_1.11064.11064.4	controllerType=0 controllerNumber=1 scan=11064	49.4879
01610:3	22	K.PREEQYN[+1768.640]STFR.V	HexNAc(4)Hex(5)Fuc(1)	N[+1769]	1065.77	3	3195.3	3195.31	0	-2.9	221	Specific	363.3	110.79	110.79	5.5	16	>sp|P01860|IGHG3_HUMAN Immunoglobulin heavy constant gamma 3 OS=Homo sapiens OX=9606 GN=IGHG3 PE=1 SV=2	2742	20210911_zy_plasma_ethcd_1.1776.1776.3	controllerType=0 controllerNumber=1 scan=1776	8.071
12675:4	15	R.HGIQYFNN[+3007.058]NTQHSSLFM[+15.995]LNEVK.R	HexNAc(5)Hex(6)Fuc(1)NeuAc(3)	M[+16], N[+3007]	1411.83	4	5644.29	5644.31	0	-3.9	162	Specific	363.57	306.38	306.38	6.41	23	>sp|P01042|KNG1_HUMAN Kininogen-1 OS=Homo sapiens OX=9606 GN=KNG1 PE=1 SV=2	6533	20210911_zy_plasma_ethcd_1.13901.13901.4	controllerType=0 controllerNumber=1 scan=13901	62.2735
10878:3	23	R.LAN[+2204.772]LTQGEDQYYLR.V	HexNAc(4)Hex(5)NeuAc(2)	N[+2205]	1296.87	3	3888.6	3888.61	0	-1.5	372	Specific	363.63	212.71	212.71	6.06	17	>sp|P10909|CLUS_HUMAN Clusterin OS=Homo sapiens OX=9606 GN=CLU PE=1 SV=1	6125	20210911_zy_plasma_ethcd_1.11930.11930.3	controllerType=0 controllerNumber=1 scan=11930	53.3856
08588:3	11	R.SWPAVGN[+2350.830]C[+57.021]SSALR.W	HexNAc(4)Hex(5)Fuc(1)NeuAc(2)	C[+57], N[+2351]	1252.5	3	3755.49	3755.5	0	-2.3	181	Specific	363.87	196.18	196.18	6.21	28	>sp|P02790|HEMO_HUMAN Hemopexin OS=Homo sapiens OX=9606 GN=HPX PE=1 SV=2	9336	20210911_zy_plasma_ethcd_1.9416.9416.3	controllerType=0 controllerNumber=1 scan=9416	41.9232
13383:3	1	K.VVLHPN[+2569.905]YSQVDIGLIK.L	HexNAc(5)Hex(6)NeuAc(2)	N[+2570]	1455.64	3	4364.9	4364.92	0	-2.8	236	Specific	363.87	251.78	251.78	6.17	163	>sp|P00738|HPT_HUMAN Haptoglobin OS=Homo sapiens OX=9606 GN=HP PE=1 SV=1	3044	20210911_zy_plasma_ethcd_1.14675.14675.3	controllerType=0 controllerNumber=1 scan=14675	65.6863
03149:3	13	K.IPC[+57.021]SQPPQIEHGTIN[+2059.735]SSR.S	HexNAc(4)Hex(5)Fuc(1)NeuAc(1)	C[+57], N[+2060]	1360.91	3	4080.71	4080.72	0	-2.7	868	Specific	363.98	185.74	185.74	6.45	16	>sp|P08603|CFAH_HUMAN Complement factor H OS=Homo sapiens OX=9606 GN=CFH PE=1 SV=4	385	20210911_zy_plasma_ethcd_1.3460.3460.3	controllerType=0 controllerNumber=1 scan=3460	15.4422
06323:3	3	R.GTAGNALM[+15.995]DGASQLMGEN[+1913.677]R.T	HexNAc(4)Hex(5)NeuAc(1)	M[+16], N[+1914]	1274.85	3	3822.52	3822.53	0	-2.6	377	Specific	364.25	176.28	143.72	6.4	38	>sp|P02675|FIBB_HUMAN Fibrinogen beta chain OS=Homo sapiens OX=9606 GN=FGB PE=1 SV=2	6006	20210911_zy_plasma_ethcd_1.6936.6936.3	controllerType=0 controllerNumber=1 scan=6936	30.897
14049:3	1	K.VVLHPN[+3226.132]YSQVDIGLIK.L	HexNAc(6)Hex(7)NeuAc(3)	N[+3226]	1674.05	3	5020.13	5021.14	-1	-1.7	236	Specific	364.33	193.69	193.69	6.31	163	>sp|P00738|HPT_HUMAN Haptoglobin OS=Homo sapiens OX=9606 GN=HP PE=1 SV=1	3044	20210911_zy_plasma_ethcd_1.15404.15404.3	controllerType=0 controllerNumber=1 scan=15404	68.9242
14189:3	11	K.ALPQPQN[+2204.772]VTSLLGC[+57.021]TH.-	HexNAc(4)Hex(5)NeuAc(2)	C[+57], N[+2205]	1314.22	3	3940.64	3940.65	0	-2.2	447	CRagged	364.49	258.82	258.82	6.3	28	>sp|P02790|HEMO_HUMAN Hemopexin OS=Homo sapiens OX=9606 GN=HPX PE=1 SV=2	9336	20210911_zy_plasma_ethcd_1.15557.15557.3	controllerType=0 controllerNumber=1 scan=15557	69.5877
00708:5	11	R.N[+892.317]GTGHGN[+1565.560]STHHGPEYMR.C	HexNAc(2)Hex(3),HexNAc(3)Hex(5)Fuc(1)	N[+892][+1566]	862.745	5	4309.7	4309.67	0	5.9	240	Specific	365	242.57	30.42	5.09	28	>sp|P02790|HEMO_HUMAN Hemopexin OS=Homo sapiens OX=9606 GN=HPX PE=1 SV=2	9336	20210911_zy_plasma_ethcd_1.789.789.5	controllerType=0 controllerNumber=1 scan=789	3.753
02795:3	38	K.FLNN[+2204.772]GTC[+57.021]TAEGK.F	HexNAc(4)Hex(5)NeuAc(2)	C[+57], N[+2205]	1172.79	3	3516.36	3516.37	0	-2.8	100	Specific	366.8	209.55	209.55	6.33	3	>sp|P05156|CFAI_HUMAN Complement factor I OS=Homo sapiens OX=9606 GN=CFI PE=1 SV=2	8939	20210911_zy_plasma_ethcd_1.3073.3073.3	controllerType=0 controllerNumber=1 scan=3073	13.7415
13284:3	21	K.VC[+57.021]QDC[+57.021]PLLAPLN[+2204.772]DTR.V	HexNAc(4)Hex(5)NeuAc(2)	C[+57]*2, N[+2205]	1326.21	3	3976.61	3976.62	0	-2.2	145	Specific	366.89	214.5	214.5	6.28	12	>sp|P02765|FETUA_HUMAN Alpha-2-HS-glycoprotein OS=Homo sapiens OX=9606 GN=AHSG PE=1 SV=2	4627	20210911_zy_plasma_ethcd_1.14566.14566.4	controllerType=0 controllerNumber=1 scan=14566	65.2112
01267:3	5	K.PREEQYN[+1971.719]STYR.V	HexNAc(5)Hex(5)Fuc(1)	N[+1972]	1138.8	3	3414.38	3414.38	0	-2.4	293	Specific	368.4	105.15	105.15	5.71	45	>sp|P0DOX5|IGG1_HUMAN Immunoglobulin gamma-1 heavy chain OS=Homo sapiens OX=9606 PE=1 SV=2	10252	20210911_zy_plasma_ethcd_1.1401.1401.3	controllerType=0 controllerNumber=1 scan=1401	6.4504
01289:3	5	K.PREEQYN[+1809.666]STYR.V	HexNAc(5)Hex(4)Fuc(1)	N[+1810]	1084.78	3	3252.32	3252.33	0	-2.6	293	Specific	368.51	113.1	113.1	5.18	45	>sp|P0DOX5|IGG1_HUMAN Immunoglobulin gamma-1 heavy chain OS=Homo sapiens OX=9606 PE=1 SV=2	10252	20210911_zy_plasma_ethcd_1.1425.1425.3	controllerType=0 controllerNumber=1 scan=1425	6.5537
09935:3	10	K.C[+57.021]GLVPVLAENYN[+1913.677]K.S	HexNAc(4)Hex(5)NeuAc(1)	C[+57], N[+1914]	1130.81	3	3390.42	3390.43	0	-2.6	421	Specific	368.75	219.08	219.08	6.33	25	>sp|TRFE_HUMAN|(Common contaminant protein)	20484	20210911_zy_plasma_ethcd_1.10896.10896.3	controllerType=0 controllerNumber=1 scan=10896	48.711
00785:3	37	K.HN[+2204.772]FSHC[+57.021]C[+57.021]SK.V	HexNAc(4)Hex(5)NeuAc(2)	C[+57]*2, N[+2205]	1127.75	3	3381.23	3381.24	0	-3.1	108	Specific	369.54	169.39	169.39	5.89	5	>sp|P43652|AFAM_HUMAN Afamin OS=Homo sapiens OX=9606 GN=AFM PE=1 SV=1	20367	20210911_zy_plasma_ethcd_1.872.872.3	controllerType=0 controllerNumber=1 scan=872	4.0834
02913:3	17	R.VYKPSAGN[+2204.772]NSLYR.D	HexNAc(4)Hex(5)NeuAc(2)	N[+2205]	1225.18	3	3673.52	3673.53	0	-1.4	155	Specific	370.16	160.55	160.55	6.07	22	>sp|P02749|APOH_HUMAN Beta-2-glycoprotein 1 OS=Homo sapiens OX=9606 GN=APOH PE=1 SV=3	19971	20210911_zy_plasma_ethcd_1.3202.3202.3	controllerType=0 controllerNumber=1 scan=3202	14.3169
13341:3	1	K.VVLHPN[+2204.772]YSQVDIGLIK.L	HexNAc(4)Hex(5)NeuAc(2)	N[+2205]	1333.93	3	3999.77	3999.78	0	-2.5	236	Specific	370.6	155.51	155.51	6.29	163	>sp|P00738|HPT_HUMAN Haptoglobin OS=Homo sapiens OX=9606 GN=HP PE=1 SV=1	3044	20210911_zy_plasma_ethcd_1.14629.14629.3	controllerType=0 controllerNumber=1 scan=14629	65.4857
13855:4	12	R.QDQC[+57.021]IYN[+4028.418]TTYLNVQR.E	HexNAc(7)Hex(8)Fuc(1)NeuAc(4)	C[+57], N[+4028]	1486.84	4	5944.32	5944.31	0	1.1	87	Specific	370.93	273.36	273.36	4.93	28	>sp|P02763|A1AG1_HUMAN Alpha-1-acid glycoprotein 1 OS=Homo sapiens OX=9606 GN=ORM1 PE=1 SV=1	2208	20210911_zy_plasma_ethcd_1.15192.15192.4	controllerType=0 controllerNumber=1 scan=15192	67.9946
14236:3	4	K.EN[+2861.000]LTAPGSDSAVFFEQGTTR.I	HexNAc(5)Hex(6)NeuAc(3)	N[+2861]	1663.34	3	4987.99	4988	0	-1.3	396	Specific	371.08	256.91	256.91	6.69	22	>sp|P00450|CERU_HUMAN Ceruloplasmin OS=Homo sapiens OX=9606 GN=CP PE=1 SV=1	460	20210911_zy_plasma_ethcd_1.15609.15609.3	controllerType=0 controllerNumber=1 scan=15609	69.8214
13299:3	21	K.VC[+57.021]QDC[+57.021]PLLAPLN[+2204.772]DTR.V	HexNAc(4)Hex(5)NeuAc(2)	C[+57]*2, N[+2205]	1326.21	3	3976.61	3976.62	0	-1.9	145	Specific	371.21	200.36	200.36	6.18	12	>sp|P02765|FETUA_HUMAN Alpha-2-HS-glycoprotein OS=Homo sapiens OX=9606 GN=AHSG PE=1 SV=2	4627	20210911_zy_plasma_ethcd_1.14583.14583.3	controllerType=0 controllerNumber=1 scan=14583	65.2814
03333:3	17	K.PSAGN[+3007.058]NSLYR.D	HexNAc(5)Hex(6)Fuc(1)NeuAc(3)	N[+3007]	1362.53	3	4085.58	4085.59	0	-0.8	158	Specific	372.54	140.29	140.29	5.18	22	>sp|P02749|APOH_HUMAN Beta-2-glycoprotein 1 OS=Homo sapiens OX=9606 GN=APOH PE=1 SV=3	19971	20210911_zy_plasma_ethcd_1.3662.3662.3	controllerType=0 controllerNumber=1 scan=3662	16.359
05412:3	27	R.FSDGLESN[+1702.581]SSTQFEVK.K	HexNAc(2)Hex(8)	N[+1703]	1159.8	3	3477.39	3477.39	0	-2.1	219	Specific	372.8	258.32	258.32	6.3	7	>sp|P0C0L5|CO4B_HUMAN Complement C4-B OS=Homo sapiens OX=9606 GN=C4B PE=1 SV=2	4060	20210911_zy_plasma_ethcd_1.5939.5939.3	controllerType=0 controllerNumber=1 scan=5939	26.4978
13224:3	1	K.VVLHPN[+2935.037]YSQVDIGLIK.L	HexNAc(6)Hex(7)NeuAc(2)	N[+2935]	1577.35	3	4730.04	4730.05	0	-2.1	236	Specific	372.93	216.27	216.27	6.35	163	>sp|P00738|HPT_HUMAN Haptoglobin OS=Homo sapiens OX=9606 GN=HP PE=1 SV=1	3044	20210911_zy_plasma_ethcd_1.14501.14501.3	controllerType=0 controllerNumber=1 scan=14501	64.922
01321:3	16	K.TKPREEQFN[+1606.587]STYR.V	HexNAc(4)Hex(4)Fuc(1)	N[+1607]	1088.14	3	3262.39	3262.4	0	-2.6	169	Specific	372.98	122.4	122.4	6.15	25	>sp|P01861|IGHG4_HUMAN Immunoglobulin heavy constant gamma 4 OS=Homo sapiens OX=9606 GN=IGHG4 PE=1 SV=1	12793	20210911_zy_plasma_ethcd_1.1460.1460.3	controllerType=0 controllerNumber=1 scan=1460	6.7126
10177:3	12	R.QDQC[+57.021]IYN[+2935.037]TTYLNVQR.E	HexNAc(6)Hex(7)NeuAc(2)	C[+57], N[+2935]	1617.65	3	4850.93	4850.93	0	-1.5	87	Specific	373.99	222.2	222.2	5.89	28	>sp|P02763|A1AG1_HUMAN Alpha-1-acid glycoprotein 1 OS=Homo sapiens OX=9606 GN=ORM1 PE=1 SV=1	2208	20210911_zy_plasma_ethcd_1.11162.11162.3	controllerType=0 controllerNumber=1 scan=11162	49.9362
11632:3	1	K.VVLHPN[+1913.677]YSQVDIGLIK.L	HexNAc(4)Hex(5)NeuAc(1)	N[+1914]	1236.89	3	3708.67	3708.69	0	-4.9	236	Specific	374.03	202.22	202.22	5.76	163	>sp|P00738|HPT_HUMAN Haptoglobin OS=Homo sapiens OX=9606 GN=HP PE=1 SV=1	3044	20210911_zy_plasma_ethcd_1.12757.12757.3	controllerType=0 controllerNumber=1 scan=12757	57.1077
12178:3	29	R.IIVPLNNREN[+2350.830]ISDPTSPLR.T	HexNAc(4)Hex(5)Fuc(1)NeuAc(2)	N[+2351]	1500.34	3	4499	4499.01	0	-1.7	62	Specific	374.49	264.83	264.83	6.14	13	>sp|P01591|IGJ_HUMAN Immunoglobulin J chain OS=Homo sapiens OX=9606 GN=JCHAIN PE=1 SV=4	4401	20210911_zy_plasma_ethcd_1.13357.13357.3	controllerType=0 controllerNumber=1 scan=13357	59.8458
01195:3	5	K.TKPREEQYN[+2059.735]STYR.V	HexNAc(4)Hex(5)Fuc(1)NeuAc(1)	N[+2060]	1244.52	3	3731.54	3731.54	0	-2.1	291	Specific	375.46	77.75	77.75	5.82	45	>sp|P0DOX5|IGG1_HUMAN Immunoglobulin gamma-1 heavy chain OS=Homo sapiens OX=9606 PE=1 SV=2	10252	20210911_zy_plasma_ethcd_1.1322.1322.3	controllerType=0 controllerNumber=1 scan=1322	6.0941
01256:3	22	K.TKPREEQYN[+1606.587]STFR.V	HexNAc(4)Hex(4)Fuc(1)	N[+1607]	1088.13	3	3262.39	3262.4	0	-4	219	Specific	375.66	80.68	80.68	5.73	16	>sp|P01860|IGHG3_HUMAN Immunoglobulin heavy constant gamma 3 OS=Homo sapiens OX=9606 GN=IGHG3 PE=1 SV=2	2742	20210911_zy_plasma_ethcd_1.1389.1389.3	controllerType=0 controllerNumber=1 scan=1389	6.3973
01613:3	22	K.PREEQYN[+1606.587]STFR.V	HexNAc(4)Hex(4)Fuc(1)	N[+1607]	1011.75	3	3033.25	3033.26	0	-3	221	Specific	376.76	115.86	115.86	4.84	16	>sp|P01860|IGHG3_HUMAN Immunoglobulin heavy constant gamma 3 OS=Homo sapiens OX=9606 GN=IGHG3 PE=1 SV=2	2742	20210911_zy_plasma_ethcd_1.1779.1779.3	controllerType=0 controllerNumber=1 scan=1779	8.0852
05970:3	15	R.ITYSIVQTN[+2204.772]C[+57.021]SK.E	HexNAc(4)Hex(5)NeuAc(2)	C[+57], N[+2205]	1206.83	3	3618.47	3618.48	0	-1.5	197	Specific	377.13	252.65	252.65	6.1	23	>sp|P01042|KNG1_HUMAN Kininogen-1 OS=Homo sapiens OX=9606 GN=KNG1 PE=1 SV=2	6533	20210911_zy_plasma_ethcd_1.6549.6549.3	controllerType=0 controllerNumber=1 scan=6549	29.1961
08822:3	11	R.SWPAVGN[+2204.772]C[+57.021]SSALR.W	HexNAc(4)Hex(5)NeuAc(2)	C[+57], N[+2205]	1203.82	3	3609.43	3609.44	0	-2.3	181	Specific	377.88	182	182	6.22	28	>sp|P02790|HEMO_HUMAN Hemopexin OS=Homo sapiens OX=9606 GN=HPX PE=1 SV=2	9336	20210911_zy_plasma_ethcd_1.9674.9674.3	controllerType=0 controllerNumber=1 scan=9674	43.1227
01410:2	5	R.EEQYN[+1460.529]STYR.V	HexNAc(4)Hex(4)	N[+1461]	1325.52	2	2650.04	2650.04	0	-2	295	Specific	378.88	240.39	240.39	5.77	45	>sp|P0DOX5|IGG1_HUMAN Immunoglobulin gamma-1 heavy chain OS=Homo sapiens OX=9606 PE=1 SV=2	10252	20210911_zy_plasma_ethcd_1.1557.1557.2	controllerType=0 controllerNumber=1 scan=1557	7.1432
00976:3	23	R.HN[+2935.037]STGC[+57.021]LR.M	HexNAc(6)Hex(7)NeuAc(2)	C[+57], N[+2935]	1293.83	3	3879.47	3879.47	0	-1.1	290	Specific	378.9	130.33	130.33	4.11	17	>sp|P10909|CLUS_HUMAN Clusterin OS=Homo sapiens OX=9606 GN=CLU PE=1 SV=1	6125	20210911_zy_plasma_ethcd_1.1082.1082.3	controllerType=0 controllerNumber=1 scan=1082	5.0198
01141:3	5	K.PREEQYN[+1768.640]STYR.V	HexNAc(4)Hex(5)Fuc(1)	N[+1769]	1071.1	3	3211.3	3211.31	0	-2.7	293	Specific	379.8	119.9	119.9	5.71	45	>sp|P0DOX5|IGG1_HUMAN Immunoglobulin gamma-1 heavy chain OS=Homo sapiens OX=9606 PE=1 SV=2	10252	20210911_zy_plasma_ethcd_1.1263.1263.3	controllerType=0 controllerNumber=1 scan=1263	5.8345
04149:3	13	K.IPC[+57.021]SQPPQIEHGTIN[+2204.772]SSR.S	HexNAc(4)Hex(5)NeuAc(2)	C[+57], N[+2205]	1409.26	3	4225.75	4225.76	0	-1.7	868	Specific	380.3	224.99	224.99	5.68	16	>sp|P08603|CFAH_HUMAN Complement factor H OS=Homo sapiens OX=9606 GN=CFH PE=1 SV=4	385	20210911_zy_plasma_ethcd_1.4556.4556.3	controllerType=0 controllerNumber=1 scan=4556	20.3435
10007:3	3	R.GTAGNALMDGASQLMGEN[+1622.582]R.T	HexNAc(4)Hex(5)	N[+1623]	1172.48	3	3515.43	3515.44	0	-2.9	377	Specific	380.35	254.63	100.37	6.47	38	>sp|P02675|FIBB_HUMAN Fibrinogen beta chain OS=Homo sapiens OX=9606 GN=FGB PE=1 SV=2	6006	20210911_zy_plasma_ethcd_1.10975.10975.3	controllerType=0 controllerNumber=1 scan=10975	49.0649
00960:3	23	R.HN[+2569.905]STGC[+57.021]LR.M	HexNAc(5)Hex(6)NeuAc(2)	C[+57], N[+2570]	1172.12	3	3514.33	3514.34	0	-2.1	290	Specific	382	134.2	134.2	4.79	17	>sp|P10909|CLUS_HUMAN Clusterin OS=Homo sapiens OX=9606 GN=CLU PE=1 SV=1	6125	20210911_zy_plasma_ethcd_1.1064.1064.3	controllerType=0 controllerNumber=1 scan=1064	4.9417
03213:3	24	K.FVEGSHN[+2204.772]STVSLTTK.N	HexNAc(4)Hex(5)NeuAc(2)	N[+2205]	1271.2	3	3811.57	3811.58	0	-1.9	3405	Specific	382.71	202.23	202.23	6.31	9	>sp|P04114|APOB_HUMAN Apolipoprotein B-100 OS=Homo sapiens OX=9606 GN=APOB PE=1 SV=2	6234	20210911_zy_plasma_ethcd_1.3530.3530.3	controllerType=0 controllerNumber=1 scan=3530	15.7583
02752:3	13	K.MDGASN[+1913.677]VTC[+57.021]INSR.W	HexNAc(4)Hex(5)NeuAc(1)	C[+57], N[+1914]	1113.44	3	3338.29	3338.3	0	-2.7	1024	Specific	382.72	188.68	155.73	6.18	16	>sp|P08603|CFAH_HUMAN Complement factor H OS=Homo sapiens OX=9606 GN=CFH PE=1 SV=4	385	20210911_zy_plasma_ethcd_1.3026.3026.3	controllerType=0 controllerNumber=1 scan=3026	13.5366
03491:3	1	K.NLFLN[+2204.772]HSENATAK.D	HexNAc(4)Hex(5)NeuAc(2)	N[+2205]	1221.84	3	3663.5	3663.51	0	-2.3	203	Specific	383.9	220.13	107.92	6.35	163	>sp|P00738|HPT_HUMAN Haptoglobin OS=Homo sapiens OX=9606 GN=HP PE=1 SV=1	3044	20210911_zy_plasma_ethcd_1.3835.3835.3	controllerType=0 controllerNumber=1 scan=3835	17.1321
05238:4	19	R.YPHKPEIN[+2204.772]STTHPGADLQENFC[+57.021]R.N	HexNAc(4)Hex(5)NeuAc(2)	C[+57], N[+2205]	1229.76	4	4916.02	4916.04	0	-2.8	136	Specific	384.11	283.23	283.23	6.06	7	>sp|P00734|THRB_HUMAN Prothrombin OS=Homo sapiens OX=9606 GN=F2 PE=1 SV=2	18404	20210911_zy_plasma_ethcd_1.5748.5748.4	controllerType=0 controllerNumber=1 scan=5748	25.6615
08185:3	15	R.ITYSIVQTN[+2861.000]C[+57.021]SK.E	HexNAc(5)Hex(6)NeuAc(3)	C[+57], N[+2861]	1425.57	3	4274.7	4274.7	0	-1.6	197	Specific	384.91	200.2	200.2	5.93	23	>sp|P01042|KNG1_HUMAN Kininogen-1 OS=Homo sapiens OX=9606 GN=KNG1 PE=1 SV=2	6533	20210911_zy_plasma_ethcd_1.8974.8974.3	controllerType=0 controllerNumber=1 scan=8974	39.9211
12570:3	12	R.QDQC[+57.021]IYN[+3372.190]TTYLNVQR.E	HexNAc(6)Hex(7)Fuc(1)NeuAc(3)	C[+57], N[+3372]	1763.37	3	5288.09	5288.09	0	0.8	87	Specific	384.97	242.71	242.71	5.04	28	>sp|P02763|A1AG1_HUMAN Alpha-1-acid glycoprotein 1 OS=Homo sapiens OX=9606 GN=ORM1 PE=1 SV=1	2208	20210911_zy_plasma_ethcd_1.13786.13786.3	controllerType=0 controllerNumber=1 scan=13786	61.7587
04203:3	9	K.TVLTPATNHM[+15.995]GN[+1419.502]VTFTIPANR.E	HexNAc(3)Hex(5)	M[+16], N[+1420]	1230.89	3	3690.65	3690.66	0	-2.1	74	Specific	385.58	293.45	293.45	6.9	22	>sp|P01024|CO3_HUMAN Complement C3 OS=Homo sapiens OX=9606 GN=C3 PE=1 SV=2	731	20210911_zy_plasma_ethcd_1.4615.4615.3	controllerType=0 controllerNumber=1 scan=4615	20.599
09340:3	3	R.GTAGNALMDGASQLM[+15.995]GEN[+2204.772]R.T	HexNAc(4)Hex(5)NeuAc(2)	M[+16], N[+2205]	1371.88	3	4113.61	4113.63	0	-2.8	377	Specific	385.99	236.49	164.27	6.28	38	>sp|P02675|FIBB_HUMAN Fibrinogen beta chain OS=Homo sapiens OX=9606 GN=FGB PE=1 SV=2	6006	20210911_zy_plasma_ethcd_1.10243.10243.3	controllerType=0 controllerNumber=1 scan=10243	45.758
06890:3	3	K.YRGTAGNALM[+15.995]DGASQLMGEN[+1913.677]R.T	HexNAc(4)Hex(5)NeuAc(1)	M[+16], N[+1914]	1381.23	3	4141.68	4141.7	0	-3.4	375	Specific	386.35	242.75	126.59	6.61	38	>sp|P02675|FIBB_HUMAN Fibrinogen beta chain OS=Homo sapiens OX=9606 GN=FGB PE=1 SV=2	6006	20210911_zy_plasma_ethcd_1.7556.7556.3	controllerType=0 controllerNumber=1 scan=7556	33.63
10324:3	3	R.GTAGNALM[+15.995]DGASQLMGEN[+2204.772]R.T	HexNAc(4)Hex(5)NeuAc(2)	M[+16], N[+2205]	1371.88	3	4113.62	4113.63	0	-2	377	Specific	386.85	256.65	173.33	6.45	38	>sp|P02675|FIBB_HUMAN Fibrinogen beta chain OS=Homo sapiens OX=9606 GN=FGB PE=1 SV=2	6006	20210911_zy_plasma_ethcd_1.11323.11323.3	controllerType=0 controllerNumber=1 scan=11323	50.6557
14319:3	21	K.VC[+57.021]QDC[+57.021]PLLAPLN[+2861.000]DTR.V	HexNAc(5)Hex(6)NeuAc(3)	C[+57]*2, N[+2861]	1544.95	3	4632.84	4632.85	0	-1.1	145	Specific	387.62	277.75	277.75	5.47	12	>sp|P02765|FETUA_HUMAN Alpha-2-HS-glycoprotein OS=Homo sapiens OX=9606 GN=AHSG PE=1 SV=2	4627	20210911_zy_plasma_ethcd_1.15700.15700.3	controllerType=0 controllerNumber=1 scan=15700	70.2241
02411:3	7	R.EEQFN[+1971.719]STFR.V	HexNAc(5)Hex(5)Fuc(1)	N[+1972]	1043.75	3	3129.23	3129.24	0	-2.9	172	Specific	388.81	170.29	170.29	5.53	35	>sp|P01859|IGHG2_HUMAN Immunoglobulin heavy constant gamma 2 OS=Homo sapiens OX=9606 GN=IGHG2 PE=1 SV=2	2858	20210911_zy_plasma_ethcd_1.2652.2652.3	controllerType=0 controllerNumber=1 scan=2652	11.8725
01650:3	23	K.KKEDALN[+2861.000]ETR.E	HexNAc(5)Hex(6)NeuAc(3)	N[+2861]	1355.55	3	4064.63	4064.63	0	-1.6	80	Specific	389.66	203.83	203.83	5.77	17	>sp|P10909|CLUS_HUMAN Clusterin OS=Homo sapiens OX=9606 GN=CLU PE=1 SV=1	6125	20210911_zy_plasma_ethcd_1.1820.1820.3	controllerType=0 controllerNumber=1 scan=1820	8.2626
12189:3	31	R.VIDFN[+1913.677]C[+57.021]TTSSVSSALANTK.D	HexNAc(4)Hex(5)NeuAc(1)	C[+57], N[+1914]	1310.22	3	3928.64	3928.65	0	-2.6	121	Specific	390.23	270.48	270.48	6.4	8	>sp|P04196|HRG_HUMAN Histidine-rich glycoprotein OS=Homo sapiens OX=9606 GN=HRG PE=1 SV=1	6586	20210911_zy_plasma_ethcd_1.13369.13369.3	controllerType=0 controllerNumber=1 scan=13369	59.8992
12579:3	12	R.QDQC[+57.021]IYN[+3226.132]TTYLNVQR.E	HexNAc(6)Hex(7)NeuAc(3)	C[+57], N[+3226]	1714.34	3	5141.02	5142.03	-1	-1.2	87	Specific	390.27	248.41	248.41	6.32	28	>sp|P02763|A1AG1_HUMAN Alpha-1-acid glycoprotein 1 OS=Homo sapiens OX=9606 GN=ORM1 PE=1 SV=1	2208	20210911_zy_plasma_ethcd_1.13796.13796.3	controllerType=0 controllerNumber=1 scan=13796	61.8008
03281:3	27	R.FSDGLESN[+1864.634]SSTQFEVKK.Y	HexNAc(2)Hex(9)	N[+1865]	1256.52	3	3767.53	3767.54	0	-2.5	219	Specific	390.45	305.7	305.7	6.53	7	>sp|P0C0L5|CO4B_HUMAN Complement C4-B OS=Homo sapiens OX=9606 GN=C4B PE=1 SV=2	4060	20210911_zy_plasma_ethcd_1.3605.3605.3	controllerType=0 controllerNumber=1 scan=3605	16.103
02584:3	1	K.NLFLN[+1913.677]HSENATAK.D	HexNAc(4)Hex(5)NeuAc(1)	N[+1914]	1124.81	3	3372.4	3372.41	0	-2.3	203	Specific	390.94	185.16	64.05	6.25	163	>sp|P00738|HPT_HUMAN Haptoglobin OS=Homo sapiens OX=9606 GN=HP PE=1 SV=1	3044	20210911_zy_plasma_ethcd_1.2842.2842.3	controllerType=0 controllerNumber=1 scan=2842	12.7163
14128:3	1	K.VVLHPN[+3226.132]YSQVDIGLIK.L	HexNAc(6)Hex(7)NeuAc(3)	N[+3226]	1674.38	3	5021.13	5021.14	0	-2	236	Specific	391.08	232.05	232.05	6.15	163	>sp|P00738|HPT_HUMAN Haptoglobin OS=Homo sapiens OX=9606 GN=HP PE=1 SV=1	3044	20210911_zy_plasma_ethcd_1.15490.15490.3	controllerType=0 controllerNumber=1 scan=15490	69.297
02473:2	7	R.EEQFN[+1647.613]STFR.V	HexNAc(5)Hex(3)Fuc(1)	N[+1648]	1403.07	2	2805.13	2805.14	0	-1.4	172	Specific	392.21	182.03	182.03	5.56	35	>sp|P01859|IGHG2_HUMAN Immunoglobulin heavy constant gamma 2 OS=Homo sapiens OX=9606 GN=IGHG2 PE=1 SV=2	2858	20210911_zy_plasma_ethcd_1.2720.2720.2	controllerType=0 controllerNumber=1 scan=2720	12.1709
02424:2	7	R.EEQFN[+1444.534]STFR.V	HexNAc(4)Hex(3)Fuc(1)	N[+1445]	1301.53	2	2602.05	2602.06	0	-2.3	172	Specific	392.54	217.97	217.97	5.89	35	>sp|P01859|IGHG2_HUMAN Immunoglobulin heavy constant gamma 2 OS=Homo sapiens OX=9606 GN=IGHG2 PE=1 SV=2	2858	20210911_zy_plasma_ethcd_1.2666.2666.2	controllerType=0 controllerNumber=1 scan=2666	11.9379
03247:3	7	R.EEQFN[+2262.814]STFR.V	HexNAc(5)Hex(5)Fuc(1)NeuAc(1)	N[+2263]	1140.78	3	3420.33	3420.34	0	-2	172	Specific	393.11	171.35	171.35	5.73	35	>sp|P01859|IGHG2_HUMAN Immunoglobulin heavy constant gamma 2 OS=Homo sapiens OX=9606 GN=IGHG2 PE=1 SV=2	2858	20210911_zy_plasma_ethcd_1.3567.3567.3	controllerType=0 controllerNumber=1 scan=3567	15.9292
14254:3	10	K.C[+57.021]GLVPVLAENYN[+2861.000]K.S	HexNAc(5)Hex(6)NeuAc(3)	C[+57], N[+2861]	1446.59	3	4337.74	4337.75	0	-1.7	421	Specific	393.14	264.61	264.61	6.22	25	>sp|TRFE_HUMAN|(Common contaminant protein)	20484	20210911_zy_plasma_ethcd_1.15628.15628.3	controllerType=0 controllerNumber=1 scan=15628	69.9071
02255:3	16	R.EEQFN[+1897.682]STYR.V	HexNAc(4)Hex(4)Fuc(1)NeuAc(1)	N[+1898]	1024.4	3	3071.19	3071.2	0	-1.8	173	Specific	394.5	140.69	140.69	5.86	25	>sp|P01861|IGHG4_HUMAN Immunoglobulin heavy constant gamma 4 OS=Homo sapiens OX=9606 GN=IGHG4 PE=1 SV=1	12793	20210911_zy_plasma_ethcd_1.2481.2481.3	controllerType=0 controllerNumber=1 scan=2481	11.1224
02481:3	7	K.PREEQFN[+1897.682]STFR.V	HexNAc(4)Hex(4)Fuc(1)NeuAc(1)	N[+1898]	1103.46	3	3308.35	3308.36	0	-1.7	170	Specific	395.83	217.81	217.81	5.75	35	>sp|P01859|IGHG2_HUMAN Immunoglobulin heavy constant gamma 2 OS=Homo sapiens OX=9606 GN=IGHG2 PE=1 SV=2	2858	20210911_zy_plasma_ethcd_1.2729.2729.3	controllerType=0 controllerNumber=1 scan=2729	12.2095
11506:3	1	K.VVLHPN[+2278.809]YSQVDIGLIK.L	HexNAc(5)Hex(6)NeuAc(1)	N[+2279]	1358.61	3	4073.81	4073.82	0	-2.2	236	Specific	396.07	239.87	239.87	6.15	163	>sp|P00738|HPT_HUMAN Haptoglobin OS=Homo sapiens OX=9606 GN=HP PE=1 SV=1	3044	20210911_zy_plasma_ethcd_1.12619.12619.3	controllerType=0 controllerNumber=1 scan=12619	56.4849
08040:3	15	R.ITYSIVQTN[+2861.000]C[+57.021]SK.E	HexNAc(5)Hex(6)NeuAc(3)	C[+57], N[+2861]	1425.57	3	4274.7	4274.7	0	-2	197	Specific	396.43	222.68	222.68	6.1	23	>sp|P01042|KNG1_HUMAN Kininogen-1 OS=Homo sapiens OX=9606 GN=KNG1 PE=1 SV=2	6533	20210911_zy_plasma_ethcd_1.8815.8815.3	controllerType=0 controllerNumber=1 scan=8815	39.2034
09518:3	2	R.GLTFQQN[+2350.830]ASSM[+15.995]C[+57.021]VPDQDTAIR.V	HexNAc(4)Hex(5)Fuc(1)NeuAc(2)	C[+57], M[+16], N[+2351]	1569.3	3	4705.89	4705.9	0	-2	203	Specific	396.98	240.46	240.46	6.7	55	>sp|P01871|IGHM_HUMAN Immunoglobulin heavy constant mu OS=Homo sapiens OX=9606 GN=IGHM PE=1 SV=4	10127	20210911_zy_plasma_ethcd_1.10438.10438.3	controllerType=0 controllerNumber=1 scan=10438	46.6362
02036:3	6	K.HYTN[+2059.735]SSQDVTVPC[+57.021]R.V	HexNAc(4)Hex(5)Fuc(1)NeuAc(1)	C[+57], N[+2060]	1241.83	3	3723.47	3723.48	0	-2.8	89	Specific	397.68	244.63	244.63	6.34	32	>sp|P01877|IGHA2_HUMAN Immunoglobulin heavy constant alpha 2 OS=Homo sapiens OX=9606 GN=IGHA2 PE=1 SV=4	10403	20210911_zy_plasma_ethcd_1.2241.2241.3	controllerType=0 controllerNumber=1 scan=2241	10.0595
03798:3	4	K.EHEGAIYPDN[+2059.735]TTDFQR.A	HexNAc(4)Hex(5)Fuc(1)NeuAc(1)	N[+2060]	1318.19	3	3952.57	3952.58	0	-1.8	129	Specific	398.2	253.79	253.79	6.33	22	>sp|P00450|CERU_HUMAN Ceruloplasmin OS=Homo sapiens OX=9606 GN=CP PE=1 SV=1	460	20210911_zy_plasma_ethcd_1.4171.4171.3	controllerType=0 controllerNumber=1 scan=4171	18.63
02573:3	17	R.VYKPSAGN[+2204.772]NSLYR.D	HexNAc(4)Hex(5)NeuAc(2)	N[+2205]	1225.18	3	3673.51	3673.53	0	-3.7	155	Specific	399.02	206.73	206.73	6.06	22	>sp|P02749|APOH_HUMAN Beta-2-glycoprotein 1 OS=Homo sapiens OX=9606 GN=APOH PE=1 SV=3	19971	20210911_zy_plasma_ethcd_1.2830.2830.3	controllerType=0 controllerNumber=1 scan=2830	12.6635
10440:3	44	K.EGYSN[+2204.772]ISYIVVNHQGISSR.L	HexNAc(4)Hex(5)NeuAc(2)	N[+2205]	1443.28	3	4327.82	4327.82	0	-1.4	79	Specific	399.26	240.13	240.13	6.11	2	>sp|P49908|SEPP1_HUMAN Selenoprotein P OS=Homo sapiens OX=9606 GN=SELENOP PE=1 SV=3	16703	20210911_zy_plasma_ethcd_1.11450.11450.3	controllerType=0 controllerNumber=1 scan=11450	51.2206
02374:3	74	K.VTAC[+57.021]HSSQPN[+2204.772]ATLYK.M	HexNAc(4)Hex(5)NeuAc(2)	C[+57], N[+2205]	1294.53	3	3881.58	3881.58	0	1.4	27	Specific	399.28	245.48	245.48	3.25	1	>sp|P05543|THBG_HUMAN Thyroxine-binding globulin OS=Homo sapiens OX=9606 GN=SERPINA7 PE=1 SV=2	13666	20210911_zy_plasma_ethcd_1.2611.2611.3	controllerType=0 controllerNumber=1 scan=2611	11.6991
06132:3	25	K.NN[+2350.830]ATVHEQVGGPSLTSDLQAQSK.G	HexNAc(4)Hex(5)Fuc(1)NeuAc(2)	N[+2351]	1578	3	4732	4732	0	-0.7	85	Specific	399.99	247.46	247.46	5.79	10	>sp|P04004|VTNC_HUMAN Vitronectin OS=Homo sapiens OX=9606 GN=VTN PE=1 SV=1	17960	20210911_zy_plasma_ethcd_1.6727.6727.3	controllerType=0 controllerNumber=1 scan=6727	29.9774
02023:3	7	K.PREEQFN[+1444.534]STFR.V	HexNAc(4)Hex(3)Fuc(1)	N[+1445]	952.406	3	2855.2	2855.21	0	-2.4	170	Specific	400.55	221.2	221.2	5.51	35	>sp|P01859|IGHG2_HUMAN Immunoglobulin heavy constant gamma 2 OS=Homo sapiens OX=9606 GN=IGHG2 PE=1 SV=2	2858	20210911_zy_plasma_ethcd_1.2227.2227.3	controllerType=0 controllerNumber=1 scan=2227	10.0023
02089:3	6	K.HYTN[+2262.814]SSQDVTVPC[+57.021]R.V	HexNAc(5)Hex(5)Fuc(1)NeuAc(1)	C[+57], N[+2263]	1309.53	3	3926.56	3926.56	0	-0.3	89	Specific	401.32	203.9	203.9	5.38	32	>sp|P01877|IGHA2_HUMAN Immunoglobulin heavy constant alpha 2 OS=Homo sapiens OX=9606 GN=IGHA2 PE=1 SV=4	10403	20210911_zy_plasma_ethcd_1.2299.2299.3	controllerType=0 controllerNumber=1 scan=2299	10.3089
13453:3	1	K.VVLHPN[+2204.772]YSQVDIGLIK.L	HexNAc(4)Hex(5)NeuAc(2)	N[+2205]	1333.93	3	3999.78	3999.78	0	-1.8	236	Specific	401.46	225.84	225.84	6.05	163	>sp|P00738|HPT_HUMAN Haptoglobin OS=Homo sapiens OX=9606 GN=HP PE=1 SV=1	3044	20210911_zy_plasma_ethcd_1.14751.14751.3	controllerType=0 controllerNumber=1 scan=14751	66.0237
09772:3	18	R.QNQC[+57.021]FYN[+2935.037]SSYLNVQR.E	HexNAc(6)Hex(7)NeuAc(2)	C[+57], N[+2935]	1619.31	3	4855.9	4855.9	0	0.5	87	Specific	403.15	260.98	260.98	4.98	17	>sp|P19652|A1AG2_HUMAN Alpha-1-acid glycoprotein 2 OS=Homo sapiens OX=9606 GN=ORM2 PE=1 SV=2	4531	20210911_zy_plasma_ethcd_1.10717.10717.3	controllerType=0 controllerNumber=1 scan=10717	47.9059
12664:3	10	K.C[+57.021]GLVPVLAENYN[+2350.830]K.S	HexNAc(4)Hex(5)Fuc(1)NeuAc(2)	C[+57], N[+2351]	1276.53	3	3827.57	3827.58	0	-2.8	421	Specific	403.41	252.82	252.82	6.2	25	>sp|TRFE_HUMAN|(Common contaminant protein)	20484	20210911_zy_plasma_ethcd_1.13889.13889.3	controllerType=0 controllerNumber=1 scan=13889	62.2168
02383:3	74	K.VTAC[+57.021]HSSQPN[+2204.772]ATLYK.M	HexNAc(4)Hex(5)NeuAc(2)	C[+57], N[+2205]	1294.53	3	3881.57	3881.58	0	-3.4	27	Specific	403.53	255.28	255.28	4.22	1	>sp|P05543|THBG_HUMAN Thyroxine-binding globulin OS=Homo sapiens OX=9606 GN=SERPINA7 PE=1 SV=2	13666	20210911_zy_plasma_ethcd_1.2621.2621.3	controllerType=0 controllerNumber=1 scan=2621	11.7401
00988:3	5	K.TKPREEQYN[+1647.613]STYR.V	HexNAc(5)Hex(3)Fuc(1)	N[+1648]	1107.14	3	3319.41	3319.42	0	-2.9	291	Specific	404.62	85.29	85.29	5.91	45	>sp|P0DOX5|IGG1_HUMAN Immunoglobulin gamma-1 heavy chain OS=Homo sapiens OX=9606 PE=1 SV=2	10252	20210911_zy_plasma_ethcd_1.1095.1095.3	controllerType=0 controllerNumber=1 scan=1095	5.0777
03130:3	13	K.IPC[+57.021]SQPPQIEHGTIN[+1913.677]SSR.S	HexNAc(4)Hex(5)NeuAc(1)	C[+57], N[+1914]	1312.22	3	3934.66	3934.66	0	-1.8	868	Specific	405.05	198.51	198.51	6.3	16	>sp|P08603|CFAH_HUMAN Complement factor H OS=Homo sapiens OX=9606 GN=CFH PE=1 SV=4	385	20210911_zy_plasma_ethcd_1.3439.3439.3	controllerType=0 controllerNumber=1 scan=3439	15.3489
01151:3	5	K.PREEQYN[+1444.534]STYR.V	HexNAc(4)Hex(3)Fuc(1)	N[+1445]	963.069	3	2887.19	2887.2	0	-2.7	293	Specific	406.66	132.95	132.95	5.71	45	>sp|P0DOX5|IGG1_HUMAN Immunoglobulin gamma-1 heavy chain OS=Homo sapiens OX=9606 PE=1 SV=2	10252	20210911_zy_plasma_ethcd_1.1274.1274.3	controllerType=0 controllerNumber=1 scan=1274	5.8839
01838:3	5	R.EEQYN[+1897.682]STYR.V	HexNAc(4)Hex(4)Fuc(1)NeuAc(1)	N[+1898]	1029.73	3	3087.19	3087.19	0	-2.6	295	Specific	407.14	137.7	137.7	5.78	45	>sp|P0DOX5|IGG1_HUMAN Immunoglobulin gamma-1 heavy chain OS=Homo sapiens OX=9606 PE=1 SV=2	10252	20210911_zy_plasma_ethcd_1.2025.2025.3	controllerType=0 controllerNumber=1 scan=2025	9.1457
08113:3	12	R.QDQC[+57.021]IYN[+2643.941]TTYLNVQR.E	HexNAc(6)Hex(7)NeuAc(1)	C[+57], N[+2644]	1520.61	3	4559.83	4559.84	0	-2.1	87	Specific	407.32	251.13	251.13	6.16	28	>sp|P02763|A1AG1_HUMAN Alpha-1-acid glycoprotein 1 OS=Homo sapiens OX=9606 GN=ORM1 PE=1 SV=1	2208	20210911_zy_plasma_ethcd_1.8895.8895.3	controllerType=0 controllerNumber=1 scan=8895	39.5658
06482:3	11	R.SWPAVGN[+1913.677]C[+57.021]SSALR.W	HexNAc(4)Hex(5)NeuAc(1)	C[+57], N[+1914]	1106.78	3	3318.34	3318.35	0	-3	181	Specific	408.58	173.32	173.32	5.88	28	>sp|P02790|HEMO_HUMAN Hemopexin OS=Homo sapiens OX=9606 GN=HPX PE=1 SV=2	9336	20210911_zy_plasma_ethcd_1.7110.7110.3	controllerType=0 controllerNumber=1 scan=7110	31.6666
08688:3	11	R.SWPAVGN[+2204.772]C[+57.021]SSALR.W	HexNAc(4)Hex(5)NeuAc(2)	C[+57], N[+2205]	1203.81	3	3609.43	3609.44	0	-3.2	181	Specific	409.02	197.89	197.89	5.87	28	>sp|P02790|HEMO_HUMAN Hemopexin OS=Homo sapiens OX=9606 GN=HPX PE=1 SV=2	9336	20210911_zy_plasma_ethcd_1.9526.9526.3	controllerType=0 controllerNumber=1 scan=9526	42.4279
08493:3	3	R.GTAGNALM[+15.995]DGASQLMGEN[+1913.677]R.T	HexNAc(4)Hex(5)NeuAc(1)	M[+16], N[+1914]	1274.85	3	3822.52	3822.53	0	-2.6	377	Specific	410.42	270.1	172.23	6.31	38	>sp|P02675|FIBB_HUMAN Fibrinogen beta chain OS=Homo sapiens OX=9606 GN=FGB PE=1 SV=2	6006	20210911_zy_plasma_ethcd_1.9312.9312.3	controllerType=0 controllerNumber=1 scan=9312	41.4514
05334:3	4	K.EHEGAIYPDN[+2350.830]TTDFQR.A	HexNAc(4)Hex(5)Fuc(1)NeuAc(2)	N[+2351]	1415.22	3	4243.66	4243.67	0	-3.2	129	Specific	411.24	261.47	58.49	5.97	22	>sp|P00450|CERU_HUMAN Ceruloplasmin OS=Homo sapiens OX=9606 GN=CP PE=1 SV=1	460	20210911_zy_plasma_ethcd_1.5853.5853.3	controllerType=0 controllerNumber=1 scan=5853	26.1252
00921:3	5	K.TKPREEQYN[+1768.640]STYR.V	HexNAc(4)Hex(5)Fuc(1)	N[+1769]	1147.48	3	3440.44	3440.45	0	-2.6	291	Specific	412.28	110.14	110.14	6.26	45	>sp|P0DOX5|IGG1_HUMAN Immunoglobulin gamma-1 heavy chain OS=Homo sapiens OX=9606 PE=1 SV=2	10252	20210911_zy_plasma_ethcd_1.1021.1021.3	controllerType=0 controllerNumber=1 scan=1021	4.7605
06231:3	58	K.FVQGN[+2204.772]STEVAC[+57.021]HPGYGLPK.A	HexNAc(4)Hex(5)NeuAc(2)	C[+57], N[+2205]	1422.59	3	4265.75	4265.76	0	-2.3	104	Specific	413.02	275.6	275.6	6.38	1	>sp|Q02985|FHR3_HUMAN Complement factor H-related protein 3 OS=Homo sapiens OX=9606 GN=CFHR3 PE=1 SV=2	2545	20210911_zy_plasma_ethcd_1.6835.6835.3	controllerType=0 controllerNumber=1 scan=6835	30.4545
01915:3	16	K.PREEQFN[+2059.735]STYR.V	HexNAc(4)Hex(5)Fuc(1)NeuAc(1)	N[+2060]	1162.8	3	3486.4	3486.41	0	-2.2	171	Specific	413.15	102.99	102.99	5.56	25	>sp|P01861|IGHG4_HUMAN Immunoglobulin heavy constant gamma 4 OS=Homo sapiens OX=9606 GN=IGHG4 PE=1 SV=1	12793	20210911_zy_plasma_ethcd_1.2109.2109.3	controllerType=0 controllerNumber=1 scan=2109	9.498
03673:3	13	K.MDGASN[+2204.772]VTC[+57.021]INSR.W	HexNAc(4)Hex(5)NeuAc(2)	C[+57], N[+2205]	1210.47	3	3629.39	3629.4	0	-2.6	1024	Specific	414.34	240.24	240.24	6.02	16	>sp|P08603|CFAH_HUMAN Complement factor H OS=Homo sapiens OX=9606 GN=CFH PE=1 SV=4	385	20210911_zy_plasma_ethcd_1.4034.4034.3	controllerType=0 controllerNumber=1 scan=4034	18.0186
05147:3	2	R.GLTFQQN[+2116.756]ASSMC[+57.021]VPDQDTAIR.V	HexNAc(5)Hex(5)NeuAc(1)	C[+57], N[+2117]	1485.95	3	4455.82	4455.83	0	-1.8	203	Specific	414.49	300.92	42.18	6.92	55	>sp|P01871|IGHM_HUMAN Immunoglobulin heavy constant mu OS=Homo sapiens OX=9606 GN=IGHM PE=1 SV=4	10127	20210911_zy_plasma_ethcd_1.5649.5649.3	controllerType=0 controllerNumber=1 scan=5649	25.2189
10251:3	3	K.YRGTAGNALMDGASQLMGEN[+1913.677]R.T	HexNAc(4)Hex(5)NeuAc(1)	N[+1914]	1375.9	3	4125.69	4125.7	0	-1.9	375	Specific	416.29	301.87	106.5	6.85	38	>sp|P02675|FIBB_HUMAN Fibrinogen beta chain OS=Homo sapiens OX=9606 GN=FGB PE=1 SV=2	6006	20210911_zy_plasma_ethcd_1.11243.11243.3	controllerType=0 controllerNumber=1 scan=11243	50.2978
01408:2	5	R.EEQYN[+1768.640]STYR.V	HexNAc(4)Hex(5)Fuc(1)	N[+1769]	1479.58	2	2958.15	2958.15	0	-2.1	295	Specific	416.3	213.7	213.7	5.8	45	>sp|P0DOX5|IGG1_HUMAN Immunoglobulin gamma-1 heavy chain OS=Homo sapiens OX=9606 PE=1 SV=2	10252	20210911_zy_plasma_ethcd_1.1555.1555.2	controllerType=0 controllerNumber=1 scan=1555	7.1332
02376:4	6	K.HYTN[+2555.925]SSQDVTVPC[+57.021]R.V	HexNAc(7)Hex(7)	C[+57], N[+2556]	1055.67	4	4219.65	4219.67	0	-5.7	89	Specific	416.53	278.17	278.17	5.95	32	>sp|P01877|IGHA2_HUMAN Immunoglobulin heavy constant alpha 2 OS=Homo sapiens OX=9606 GN=IGHA2 PE=1 SV=4	10403	20210911_zy_plasma_ethcd_1.2613.2613.4	controllerType=0 controllerNumber=1 scan=2613	11.7071
02645:3	13	R.ISEEN[+2204.772]ETTC[+57.021]YM[+15.995]GK.W	HexNAc(4)Hex(5)NeuAc(2)	C[+57], M[+16], N[+2205]	1261.47	3	3782.41	3782.42	0	-2	907	Specific	416.62	208.44	208.44	6.17	16	>sp|P08603|CFAH_HUMAN Complement factor H OS=Homo sapiens OX=9606 GN=CFH PE=1 SV=4	385	20210911_zy_plasma_ethcd_1.2909.2909.3	controllerType=0 controllerNumber=1 scan=2909	13.0187
09966:3	18	R.QNQC[+57.021]FYN[+2569.905]SSYLNVQR.E	HexNAc(5)Hex(6)NeuAc(2)	C[+57], N[+2570]	1497.59	3	4490.76	4490.77	0	-1.6	87	Specific	416.83	258.09	258.09	5.93	17	>sp|P19652|A1AG2_HUMAN Alpha-1-acid glycoprotein 2 OS=Homo sapiens OX=9606 GN=ORM2 PE=1 SV=2	4531	20210911_zy_plasma_ethcd_1.10930.10930.3	controllerType=0 controllerNumber=1 scan=10930	48.866
00995:3	5	K.TKPREEQYN[+1809.666]STYR.V	HexNAc(5)Hex(4)Fuc(1)	N[+1810]	1161.16	3	3481.47	3481.47	0	-2.4	291	Specific	416.85	85.34	85.34	6.24	45	>sp|P0DOX5|IGG1_HUMAN Immunoglobulin gamma-1 heavy chain OS=Homo sapiens OX=9606 PE=1 SV=2	10252	20210911_zy_plasma_ethcd_1.1102.1102.3	controllerType=0 controllerNumber=1 scan=1102	5.1123
01248:3	5	K.PREEQYN[+1647.613]STYR.V	HexNAc(5)Hex(3)Fuc(1)	N[+1648]	1030.76	3	3090.27	3090.28	0	-2.6	293	Specific	416.92	125.38	125.38	5.37	45	>sp|P0DOX5|IGG1_HUMAN Immunoglobulin gamma-1 heavy chain OS=Homo sapiens OX=9606 PE=1 SV=2	10252	20210911_zy_plasma_ethcd_1.1380.1380.3	controllerType=0 controllerNumber=1 scan=1380	6.358
10178:3	12	R.QDQC[+57.021]IYN[+3081.095]TTYLNVQR.E	HexNAc(6)Hex(7)Fuc(1)NeuAc(2)	C[+57], N[+3081]	1666	3	4995.98	4996.99	-1	-1.9	87	Specific	417.34	267	267	6.39	28	>sp|P02763|A1AG1_HUMAN Alpha-1-acid glycoprotein 1 OS=Homo sapiens OX=9606 GN=ORM1 PE=1 SV=1	2208	20210911_zy_plasma_ethcd_1.11163.11163.3	controllerType=0 controllerNumber=1 scan=11163	49.9413
12198:3	18	R.QNQC[+57.021]FYN[+3226.132]SSYLNVQR.E	HexNAc(6)Hex(7)NeuAc(3)	C[+57], N[+3226]	1716	3	5145.99	5147	-1	-0.3	87	Specific	418.43	282.08	282.08	5.57	17	>sp|P19652|A1AG2_HUMAN Alpha-1-acid glycoprotein 2 OS=Homo sapiens OX=9606 GN=ORM2 PE=1 SV=2	4531	20210911_zy_plasma_ethcd_1.13379.13379.3	controllerType=0 controllerNumber=1 scan=13379	59.9442
12216:4	18	R.QNQC[+57.021]FYN[+3226.132]SSYLNVQR.E	HexNAc(6)Hex(7)NeuAc(3)	C[+57], N[+3226]	1287.5	4	5146.98	5147	0	-4.2	87	Specific	418.73	321.35	321.35	5.68	17	>sp|P19652|A1AG2_HUMAN Alpha-1-acid glycoprotein 2 OS=Homo sapiens OX=9606 GN=ORM2 PE=1 SV=2	4531	20210911_zy_plasma_ethcd_1.13399.13399.4	controllerType=0 controllerNumber=1 scan=13399	60.036
01174:3	2	K.YKN[+2262.814]NSDISSTR.G	HexNAc(5)Hex(5)Fuc(1)NeuAc(1)	N[+2263]	1183.15	3	3547.43	3547.43	0	-2	44	Specific	418.8	140.37	140.37	5.7	55	>sp|P01871|IGHM_HUMAN Immunoglobulin heavy constant mu OS=Homo sapiens OX=9606 GN=IGHM PE=1 SV=4	10127	20210911_zy_plasma_ethcd_1.1299.1299.3	controllerType=0 controllerNumber=1 scan=1299	5.9933
12643:3	10	K.C[+57.021]GLVPVLAENYN[+2204.772]K.S	HexNAc(4)Hex(5)NeuAc(2)	C[+57], N[+2205]	1227.84	3	3681.51	3681.52	0	-2.7	421	Specific	419.77	262.17	262.17	6.14	25	>sp|TRFE_HUMAN|(Common contaminant protein)	20484	20210911_zy_plasma_ethcd_1.13866.13866.3	controllerType=0 controllerNumber=1 scan=13866	62.1152
11042:3	11	R.SWPAVGN[+2861.000]C[+57.021]SSALR.W	HexNAc(5)Hex(6)NeuAc(3)	C[+57], N[+2861]	1422.56	3	4265.66	4265.67	0	-1.8	181	Specific	420.28	216.2	216.2	6.25	28	>sp|P02790|HEMO_HUMAN Hemopexin OS=Homo sapiens OX=9606 GN=HPX PE=1 SV=2	9336	20210911_zy_plasma_ethcd_1.12110.12110.3	controllerType=0 controllerNumber=1 scan=12110	54.1916
05084:3	3	R.GTAGNALMDGASQLM[+15.995]GEN[+1913.677]R.T	HexNAc(4)Hex(5)NeuAc(1)	M[+16], N[+1914]	1274.85	3	3822.52	3822.53	0	-2.1	377	Specific	420.37	275.62	168.52	6.37	38	>sp|P02675|FIBB_HUMAN Fibrinogen beta chain OS=Homo sapiens OX=9606 GN=FGB PE=1 SV=2	6006	20210911_zy_plasma_ethcd_1.5580.5580.3	controllerType=0 controllerNumber=1 scan=5580	24.9091
12516:3	10	K.C[+57.021]GLVPVLAENYN[+2204.772]K.S	HexNAc(4)Hex(5)NeuAc(2)	C[+57], N[+2205]	1227.84	3	3681.52	3681.52	0	-2.3	421	Specific	420.68	287.39	287.39	6.23	25	>sp|TRFE_HUMAN|(Common contaminant protein)	20484	20210911_zy_plasma_ethcd_1.13727.13727.3	controllerType=0 controllerNumber=1 scan=13727	61.4939
07110:3	24	R.FN[+1913.677]SSYLQGTNQITGR.Y	HexNAc(4)Hex(5)NeuAc(1)	N[+1914]	1200.5	3	3599.49	3599.5	0	-1.8	1522	Specific	420.87	230.94	230.94	6.06	9	>sp|P04114|APOB_HUMAN Apolipoprotein B-100 OS=Homo sapiens OX=9606 GN=APOB PE=1 SV=2	6234	20210911_zy_plasma_ethcd_1.7797.7797.3	controllerType=0 controllerNumber=1 scan=7797	34.6922
02777:3	28	K.QSVPAHFVALN[+1702.581]GSK.L	HexNAc(2)Hex(8)	N[+1703]	1053.12	3	3157.35	3157.36	0	-2.2	611	Specific	421.27	298.14	298.14	6.26	6	>sp|P06681|CO2_HUMAN Complement C2 OS=Homo sapiens OX=9606 GN=C2 PE=1 SV=2	8379	20210911_zy_plasma_ethcd_1.3053.3053.3	controllerType=0 controllerNumber=1 scan=3053	13.6552
08062:3	15	R.ITYSIVQTN[+3007.058]C[+57.021]SK.E	HexNAc(5)Hex(6)Fuc(1)NeuAc(3)	C[+57], N[+3007]	1474.26	3	4420.75	4420.76	0	-2	197	Specific	421.9	250.97	250.97	6.27	23	>sp|P01042|KNG1_HUMAN Kininogen-1 OS=Homo sapiens OX=9606 GN=KNG1 PE=1 SV=2	6533	20210911_zy_plasma_ethcd_1.8839.8839.3	controllerType=0 controllerNumber=1 scan=8839	39.3127
10261:3	3	R.GTAGNALM[+15.995]DGASQLMGEN[+2204.772]R.T	HexNAc(4)Hex(5)NeuAc(2)	M[+16], N[+2205]	1371.88	3	4113.62	4113.63	0	-2.3	377	Specific	422.37	270.24	157.65	6.38	38	>sp|P02675|FIBB_HUMAN Fibrinogen beta chain OS=Homo sapiens OX=9606 GN=FGB PE=1 SV=2	6006	20210911_zy_plasma_ethcd_1.11254.11254.3	controllerType=0 controllerNumber=1 scan=11254	50.3444
02222:3	16	R.EEQFN[+2059.735]STYR.V	HexNAc(4)Hex(5)Fuc(1)NeuAc(1)	N[+2060]	1078.42	3	3233.24	3233.25	0	-2.4	173	Specific	424.13	139.74	139.74	5.86	25	>sp|P01861|IGHG4_HUMAN Immunoglobulin heavy constant gamma 4 OS=Homo sapiens OX=9606 GN=IGHG4 PE=1 SV=1	12793	20210911_zy_plasma_ethcd_1.2445.2445.3	controllerType=0 controllerNumber=1 scan=2445	10.9676
08628:3	11	R.SWPAVGN[+2204.772]C[+57.021]SSALR.W	HexNAc(4)Hex(5)NeuAc(2)	C[+57], N[+2205]	1203.82	3	3609.43	3609.44	0	-2.9	181	Specific	424.13	218.63	218.63	6.05	28	>sp|P02790|HEMO_HUMAN Hemopexin OS=Homo sapiens OX=9606 GN=HPX PE=1 SV=2	9336	20210911_zy_plasma_ethcd_1.9460.9460.3	controllerType=0 controllerNumber=1 scan=9460	42.1237
03220:3	7	R.EEQFN[+2059.735]STFR.V	HexNAc(4)Hex(5)Fuc(1)NeuAc(1)	N[+2060]	1073.09	3	3217.25	3217.26	0	-2.3	172	Specific	424.61	171.77	171.77	5.72	35	>sp|P01859|IGHG2_HUMAN Immunoglobulin heavy constant gamma 2 OS=Homo sapiens OX=9606 GN=IGHG2 PE=1 SV=2	2858	20210911_zy_plasma_ethcd_1.3538.3538.3	controllerType=0 controllerNumber=1 scan=3538	15.7938
11715:3	1	K.VVLHPN[+1913.677]YSQVDIGLIK.L	HexNAc(4)Hex(5)NeuAc(1)	N[+1914]	1236.9	3	3708.68	3708.69	0	-3.1	236	Specific	424.61	225.34	225.34	5.93	163	>sp|P00738|HPT_HUMAN Haptoglobin OS=Homo sapiens OX=9606 GN=HP PE=1 SV=1	3044	20210911_zy_plasma_ethcd_1.12848.12848.4	controllerType=0 controllerNumber=1 scan=12848	57.5232
14091:4	1	K.VVLHPN[+2861.000]YSQVDIGLIK.L	HexNAc(5)Hex(6)NeuAc(3)	N[+2861]	1164.76	4	4656	4656.01	0	-2.5	236	Specific	424.65	338.92	338.92	6.38	163	>sp|P00738|HPT_HUMAN Haptoglobin OS=Homo sapiens OX=9606 GN=HP PE=1 SV=1	3044	20210911_zy_plasma_ethcd_1.15450.15450.4	controllerType=0 controllerNumber=1 scan=15450	69.1224
01577:3	5	K.PREEQYN[+1897.682]STYR.V	HexNAc(4)Hex(4)Fuc(1)NeuAc(1)	N[+1898]	1114.12	3	3340.34	3340.35	0	-2.1	293	Specific	425.73	138.83	138.83	5.77	45	>sp|P0DOX5|IGG1_HUMAN Immunoglobulin gamma-1 heavy chain OS=Homo sapiens OX=9606 PE=1 SV=2	10252	20210911_zy_plasma_ethcd_1.1740.1740.3	controllerType=0 controllerNumber=1 scan=1740	7.915
11663:3	1	K.VVLHPN[+1913.677]YSQVDIGLIK.L	HexNAc(4)Hex(5)NeuAc(1)	N[+1914]	1236.9	3	3708.68	3708.69	0	-2.2	236	Specific	426.03	244.78	244.78	6.31	163	>sp|P00738|HPT_HUMAN Haptoglobin OS=Homo sapiens OX=9606 GN=HP PE=1 SV=1	3044	20210911_zy_plasma_ethcd_1.12791.12791.3	controllerType=0 controllerNumber=1 scan=12791	57.2631
14240:3	11	K.ALPQPQN[+1913.677]VTSLLGC[+57.021]TH.-	HexNAc(4)Hex(5)NeuAc(1)	C[+57], N[+1914]	1217.19	3	3649.56	3649.56	0	0.2	447	CRagged	426.09	247.46	247.46	5.12	28	>sp|P02790|HEMO_HUMAN Hemopexin OS=Homo sapiens OX=9606 GN=HPX PE=1 SV=2	9336	20210911_zy_plasma_ethcd_1.15613.15613.3	controllerType=0 controllerNumber=1 scan=15613	69.8395
08811:3	11	R.SWPAVGN[+2350.830]C[+57.021]SSALR.W	HexNAc(4)Hex(5)Fuc(1)NeuAc(2)	C[+57], N[+2351]	1252.5	3	3755.49	3755.5	0	-2.3	181	Specific	427.46	269.68	269.68	6.2	28	>sp|P02790|HEMO_HUMAN Hemopexin OS=Homo sapiens OX=9606 GN=HPX PE=1 SV=2	9336	20210911_zy_plasma_ethcd_1.9662.9662.3	controllerType=0 controllerNumber=1 scan=9662	43.069
13951:4	12	R.QDQC[+57.021]IYN[+3517.228]TTYLNVQR.E	HexNAc(6)Hex(7)NeuAc(4)	C[+57], N[+3517]	1358.78	4	5432.11	5433.12	-1	-2.3	87	Specific	427.77	279.21	279.21	6.4	28	>sp|P02763|A1AG1_HUMAN Alpha-1-acid glycoprotein 1 OS=Homo sapiens OX=9606 GN=ORM1 PE=1 SV=1	2208	20210911_zy_plasma_ethcd_1.15297.15297.4	controllerType=0 controllerNumber=1 scan=15297	68.45
02366:2	7	R.EEQFN[+1768.640]STFR.V	HexNAc(4)Hex(5)Fuc(1)	N[+1769]	1463.58	2	2926.16	2926.16	0	-1.9	172	Specific	430.18	216.3	216.3	5.87	35	>sp|P01859|IGHG2_HUMAN Immunoglobulin heavy constant gamma 2 OS=Homo sapiens OX=9606 GN=IGHG2 PE=1 SV=2	2858	20210911_zy_plasma_ethcd_1.2602.2602.2	controllerType=0 controllerNumber=1 scan=2602	11.6636
11112:3	9	K.TVLTPATNHMGN[+1872.651]VTFTIPANR.E	HexNAc(3)Hex(6)NeuAc(1)	N[+1873]	1376.61	3	4127.8	4127.81	0	-2.1	74	Specific	430.26	241.13	241.13	6.93	22	>sp|P01024|CO3_HUMAN Complement C3 OS=Homo sapiens OX=9606 GN=C3 PE=1 SV=2	731	20210911_zy_plasma_ethcd_1.12186.12186.3	controllerType=0 controllerNumber=1 scan=12186	54.5366
01736:3	7	K.TKPREEQFN[+1444.534]STFR.V	HexNAc(4)Hex(3)Fuc(1)	N[+1445]	1028.79	3	3084.34	3084.35	0	-2.4	168	Specific	430.58	247.46	247.46	6.45	35	>sp|P01859|IGHG2_HUMAN Immunoglobulin heavy constant gamma 2 OS=Homo sapiens OX=9606 GN=IGHG2 PE=1 SV=2	2858	20210911_zy_plasma_ethcd_1.1914.1914.3	controllerType=0 controllerNumber=1 scan=1914	8.6841
13351:3	1	K.VVLHPN[+2204.772]YSQVDIGLIK.L	HexNAc(4)Hex(5)NeuAc(2)	N[+2205]	1333.93	3	3999.78	3999.78	0	-1.9	236	Specific	431.46	200.25	200.25	6.18	163	>sp|P00738|HPT_HUMAN Haptoglobin OS=Homo sapiens OX=9606 GN=HP PE=1 SV=1	3044	20210911_zy_plasma_ethcd_1.14640.14640.3	controllerType=0 controllerNumber=1 scan=14640	65.535
02460:3	24	K.FVEGSHN[+1913.677]STVSLTTK.N	HexNAc(4)Hex(5)NeuAc(1)	N[+1914]	1174.16	3	3520.48	3520.48	0	-2.4	3405	Specific	432.85	205.75	205.75	6.3	9	>sp|P04114|APOB_HUMAN Apolipoprotein B-100 OS=Homo sapiens OX=9606 GN=APOB PE=1 SV=2	6234	20210911_zy_plasma_ethcd_1.2706.2706.3	controllerType=0 controllerNumber=1 scan=2706	12.1092
03752:3	28	K.QSVPAHFVALN[+1872.651]GSK.L	HexNAc(3)Hex(6)NeuAc(1)	N[+1873]	1109.81	3	3327.42	3327.43	0	-2.8	611	Specific	433.79	251.94	251.94	5.66	6	>sp|P06681|CO2_HUMAN Complement C2 OS=Homo sapiens OX=9606 GN=C2 PE=1 SV=2	8379	20210911_zy_plasma_ethcd_1.4121.4121.3	controllerType=0 controllerNumber=1 scan=4121	18.406
08287:3	3	R.GTAGNALM[+15.995]DGASQLMGEN[+1913.677]R.T	HexNAc(4)Hex(5)NeuAc(1)	M[+16], N[+1914]	1274.85	3	3822.52	3822.53	0	-1.6	377	Specific	434.09	274.73	180.24	6.14	38	>sp|P02675|FIBB_HUMAN Fibrinogen beta chain OS=Homo sapiens OX=9606 GN=FGB PE=1 SV=2	6006	20210911_zy_plasma_ethcd_1.9086.9086.3	controllerType=0 controllerNumber=1 scan=9086	40.4261
12578:3	10	K.C[+57.021]GLVPVLAENYN[+2204.772]K.S	HexNAc(4)Hex(5)NeuAc(2)	C[+57], N[+2205]	1227.84	3	3681.51	3681.52	0	-2.5	421	Specific	435.54	312.07	312.07	6.41	25	>sp|TRFE_HUMAN|(Common contaminant protein)	20484	20210911_zy_plasma_ethcd_1.13795.13795.3	controllerType=0 controllerNumber=1 scan=13795	61.7985
12558:4	12	R.QDQC[+57.021]IYN[+3226.132]TTYLNVQR.E	HexNAc(6)Hex(7)NeuAc(3)	C[+57], N[+3226]	1286.26	4	5142.01	5142.03	0	-3.3	87	Specific	437.93	305.07	305.07	6.09	28	>sp|P02763|A1AG1_HUMAN Alpha-1-acid glycoprotein 1 OS=Homo sapiens OX=9606 GN=ORM1 PE=1 SV=1	2208	20210911_zy_plasma_ethcd_1.13773.13773.4	controllerType=0 controllerNumber=1 scan=13773	61.7008
02886:3	17	R.VYKPSAGN[+1913.677]NSLYR.D	HexNAc(4)Hex(5)NeuAc(1)	N[+1914]	1128.15	3	3382.42	3382.43	0	-2.4	155	Specific	440.2	166.86	166.86	6.31	22	>sp|P02749|APOH_HUMAN Beta-2-glycoprotein 1 OS=Homo sapiens OX=9606 GN=APOH PE=1 SV=3	19971	20210911_zy_plasma_ethcd_1.3172.3172.3	controllerType=0 controllerNumber=1 scan=3172	14.1859
02200:3	6	K.TPLTAN[+1971.719]ITK.S	HexNAc(5)Hex(5)Fuc(1)	N[+1972]	977.428	3	2930.27	2930.28	0	-2.4	200	Specific	442.07	212.39	212.39	5.88	32	>sp|P01877|IGHA2_HUMAN Immunoglobulin heavy constant alpha 2 OS=Homo sapiens OX=9606 GN=IGHA2 PE=1 SV=4	10403	20210911_zy_plasma_ethcd_1.2421.2421.3	controllerType=0 controllerNumber=1 scan=2421	10.8602
04288:3	13	K.IPC[+57.021]SQPPQIEHGTIN[+2204.772]SSR.S	HexNAc(4)Hex(5)NeuAc(2)	C[+57], N[+2205]	1409.26	3	4225.75	4225.76	0	-1.5	868	Specific	443.73	292.77	292.77	6.29	16	>sp|P08603|CFAH_HUMAN Complement factor H OS=Homo sapiens OX=9606 GN=CFH PE=1 SV=4	385	20210911_zy_plasma_ethcd_1.4708.4708.3	controllerType=0 controllerNumber=1 scan=4708	21.0041
13297:3	1	K.VVLHPN[+2569.905]YSQVDIGLIK.L	HexNAc(5)Hex(6)NeuAc(2)	N[+2570]	1455.64	3	4364.91	4364.92	0	-2.2	236	Specific	444.59	315.3	315.3	6.51	163	>sp|P00738|HPT_HUMAN Haptoglobin OS=Homo sapiens OX=9606 GN=HP PE=1 SV=1	3044	20210911_zy_plasma_ethcd_1.14581.14581.3	controllerType=0 controllerNumber=1 scan=14581	65.2733
02784:3	40	R.GGSSGWSGGLAQN[+1913.677]R.S	HexNAc(4)Hex(5)NeuAc(1)	N[+1914]	1083.1	3	3247.29	3247.3	0	-2.5	425	Specific	444.96	214.99	214.99	6.3	2	>sp|P07357|CO8A_HUMAN Complement component C8 alpha chain OS=Homo sapiens OX=9606 GN=C8A PE=1 SV=2	5176	20210911_zy_plasma_ethcd_1.3061.3061.3	controllerType=0 controllerNumber=1 scan=3061	13.6902
03899:3	40	R.GGSSGWSGGLAQN[+2204.772]R.S	HexNAc(4)Hex(5)NeuAc(2)	N[+2205]	1180.13	3	3538.39	3538.4	0	-2.2	425	Specific	446.26	232.51	232.51	6.13	2	>sp|P07357|CO8A_HUMAN Complement component C8 alpha chain OS=Homo sapiens OX=9606 GN=C8A PE=1 SV=2	5176	20210911_zy_plasma_ethcd_1.4282.4282.3	controllerType=0 controllerNumber=1 scan=4282	19.1249
02942:3	6	K.TPLTAN[+2262.814]ITK.S	HexNAc(5)Hex(5)Fuc(1)NeuAc(1)	N[+2263]	1074.46	3	3221.36	3221.37	0	-2.3	200	Specific	446.69	201.58	201.58	5.88	32	>sp|P01877|IGHA2_HUMAN Immunoglobulin heavy constant alpha 2 OS=Homo sapiens OX=9606 GN=IGHA2 PE=1 SV=4	10403	20210911_zy_plasma_ethcd_1.3234.3234.3	controllerType=0 controllerNumber=1 scan=3234	14.455
05918:3	3	K.YRGTAGNALMDGASQLM[+15.995]GEN[+1913.677]R.T	HexNAc(4)Hex(5)NeuAc(1)	M[+16], N[+1914]	1381.23	3	4141.69	4141.7	0	-2.3	375	Specific	447.24	317.37	103.83	6.99	38	>sp|P02675|FIBB_HUMAN Fibrinogen beta chain OS=Homo sapiens OX=9606 GN=FGB PE=1 SV=2	6006	20210911_zy_plasma_ethcd_1.6493.6493.3	controllerType=0 controllerNumber=1 scan=6493	28.9475
09854:3	18	R.QNQC[+57.021]FYN[+2935.037]SSYLNVQR.E	HexNAc(6)Hex(7)NeuAc(2)	C[+57], N[+2935]	1619.3	3	4855.89	4855.9	0	-2.3	87	Specific	448.16	319.18	319.18	6.45	17	>sp|P19652|A1AG2_HUMAN Alpha-1-acid glycoprotein 2 OS=Homo sapiens OX=9606 GN=ORM2 PE=1 SV=2	4531	20210911_zy_plasma_ethcd_1.10807.10807.3	controllerType=0 controllerNumber=1 scan=10807	48.31
01038:3	23	R.HN[+2204.772]STGC[+57.021]LR.M	HexNAc(4)Hex(5)NeuAc(2)	C[+57], N[+2205]	1050.41	3	3149.2	3149.21	0	-1.5	290	Specific	448.86	174.72	174.72	4.48	17	>sp|P10909|CLUS_HUMAN Clusterin OS=Homo sapiens OX=9606 GN=CLU PE=1 SV=1	6125	20210911_zy_plasma_ethcd_1.1150.1150.3	controllerType=0 controllerNumber=1 scan=1150	5.3289
14341:3	21	K.VC[+57.021]QDC[+57.021]PLLAPLN[+3007.058]DTR.V	HexNAc(5)Hex(6)Fuc(1)NeuAc(3)	C[+57]*2, N[+3007]	1593.64	3	4778.9	4778.9	0	-1.6	145	Specific	449.2	289.23	289.23	6.03	12	>sp|P02765|FETUA_HUMAN Alpha-2-HS-glycoprotein OS=Homo sapiens OX=9606 GN=AHSG PE=1 SV=2	4627	20210911_zy_plasma_ethcd_1.15724.15724.3	controllerType=0 controllerNumber=1 scan=15724	70.3307
11651:3	1	K.VVLHPN[+1913.677]YSQVDIGLIK.L	HexNAc(4)Hex(5)NeuAc(1)	N[+1914]	1236.9	3	3708.68	3708.69	0	-3.2	236	Specific	451.54	249.11	249.11	6.18	163	>sp|P00738|HPT_HUMAN Haptoglobin OS=Homo sapiens OX=9606 GN=HP PE=1 SV=1	3044	20210911_zy_plasma_ethcd_1.12778.12778.3	controllerType=0 controllerNumber=1 scan=12778	57.2041
01130:3	5	K.PREEQYN[+1606.587]STYR.V	HexNAc(4)Hex(4)Fuc(1)	N[+1607]	1017.09	3	3049.24	3049.25	0	-2.5	293	Specific	451.87	151.08	151.08	5.73	45	>sp|P0DOX5|IGG1_HUMAN Immunoglobulin gamma-1 heavy chain OS=Homo sapiens OX=9606 PE=1 SV=2	10252	20210911_zy_plasma_ethcd_1.1251.1251.3	controllerType=0 controllerNumber=1 scan=1251	5.7837
13308:3	11	K.ALPQPQN[+1913.677]VTSLLGC[+57.021]TH.-	HexNAc(4)Hex(5)NeuAc(1)	C[+57], N[+1914]	1217.19	3	3649.55	3649.56	0	-3	447	CRagged	453.04	255.91	255.91	6.11	28	>sp|P02790|HEMO_HUMAN Hemopexin OS=Homo sapiens OX=9606 GN=HPX PE=1 SV=2	9336	20210911_zy_plasma_ethcd_1.14593.14593.3	controllerType=0 controllerNumber=1 scan=14593	65.3262
01723:3	7	K.TKPREEQFN[+1606.587]STFR.V	HexNAc(4)Hex(4)Fuc(1)	N[+1607]	1082.8	3	3246.4	3246.41	0	-2.3	168	Specific	454.11	267.34	267.34	6.12	35	>sp|P01859|IGHG2_HUMAN Immunoglobulin heavy constant gamma 2 OS=Homo sapiens OX=9606 GN=IGHG2 PE=1 SV=2	2858	20210911_zy_plasma_ethcd_1.1900.1900.3	controllerType=0 controllerNumber=1 scan=1900	8.6233
12613:3	12	R.QDQC[+57.021]IYN[+2861.000]TTYLNVQR.E	HexNAc(5)Hex(6)NeuAc(3)	C[+57], N[+2861]	1592.97	3	4776.89	4776.9	0	-1.6	87	Specific	454.69	291.21	291.21	6.03	28	>sp|P02763|A1AG1_HUMAN Alpha-1-acid glycoprotein 1 OS=Homo sapiens OX=9606 GN=ORM1 PE=1 SV=1	2208	20210911_zy_plasma_ethcd_1.13833.13833.3	controllerType=0 controllerNumber=1 scan=13833	61.9697
02254:3	16	R.EEQFN[+1897.682]STYR.V	HexNAc(4)Hex(4)Fuc(1)NeuAc(1)	N[+1898]	1024.4	3	3071.19	3071.2	0	-2.4	173	Specific	454.79	137.62	137.62	5.93	25	>sp|P01861|IGHG4_HUMAN Immunoglobulin heavy constant gamma 4 OS=Homo sapiens OX=9606 GN=IGHG4 PE=1 SV=1	12793	20210911_zy_plasma_ethcd_1.2479.2479.3	controllerType=0 controllerNumber=1 scan=2479	11.1164
06896:3	3	K.YRGTAGNALM[+15.995]DGASQLMGEN[+1913.677]R.T	HexNAc(4)Hex(5)NeuAc(1)	M[+16], N[+1914]	1381.23	3	4141.68	4141.7	0	-2.6	375	Specific	456.97	318.28	143.74	7.01	38	>sp|P02675|FIBB_HUMAN Fibrinogen beta chain OS=Homo sapiens OX=9606 GN=FGB PE=1 SV=2	6006	20210911_zy_plasma_ethcd_1.7563.7563.3	controllerType=0 controllerNumber=1 scan=7563	33.6588
02687:3	61	R.N[+2204.772]HSC[+57.021]EPC[+57.021]QTLAVR.S	HexNAc(4)Hex(5)NeuAc(2)	C[+57]*2, N[+2205]	1259.49	3	3776.47	3776.48	0	-2.3	433	Specific	456.97	184.54	184.54	6.28	2	>sp|P00748|FA12_HUMAN Coagulation factor XII OS=Homo sapiens OX=9606 GN=F12 PE=1 SV=3	8187	20210911_zy_plasma_ethcd_1.2955.2955.3	controllerType=0 controllerNumber=1 scan=2955	13.2259
07712:3	18	R.QNQC[+57.021]FYN[+2643.941]SSYLNVQR.E	HexNAc(6)Hex(7)NeuAc(1)	C[+57], N[+2644]	1522.27	3	4564.79	4564.81	0	-2.8	87	Specific	457.87	337.26	337.26	6.45	17	>sp|P19652|A1AG2_HUMAN Alpha-1-acid glycoprotein 2 OS=Homo sapiens OX=9606 GN=ORM2 PE=1 SV=2	4531	20210911_zy_plasma_ethcd_1.8456.8456.3	controllerType=0 controllerNumber=1 scan=8456	37.6127
02190:3	17	R.VYKPSAGN[+1913.677]NSLYR.D	HexNAc(4)Hex(5)NeuAc(1)	N[+1914]	1128.15	3	3382.43	3382.43	0	-1.8	155	Specific	457.92	208.7	208.7	6.39	22	>sp|P02749|APOH_HUMAN Beta-2-glycoprotein 1 OS=Homo sapiens OX=9606 GN=APOH PE=1 SV=3	19971	20210911_zy_plasma_ethcd_1.2410.2410.3	controllerType=0 controllerNumber=1 scan=2410	10.8113
13734:3	3	R.GTAGNALMDGASQLMGEN[+2204.772]R.T	HexNAc(4)Hex(5)NeuAc(2)	N[+2205]	1366.55	3	4097.62	4097.63	0	-2	377	Specific	460.82	307.17	307.17	6.69	38	>sp|P02675|FIBB_HUMAN Fibrinogen beta chain OS=Homo sapiens OX=9606 GN=FGB PE=1 SV=2	6006	20210911_zy_plasma_ethcd_1.15059.15059.3	controllerType=0 controllerNumber=1 scan=15059	67.3992
14238:3	11	K.ALPQPQN[+2204.772]VTSLLGC[+57.021]TH.-	HexNAc(4)Hex(5)NeuAc(2)	C[+57], N[+2205]	1314.22	3	3940.64	3940.65	0	-2.3	447	CRagged	461.06	310.27	310.27	6.51	28	>sp|P02790|HEMO_HUMAN Hemopexin OS=Homo sapiens OX=9606 GN=HPX PE=1 SV=2	9336	20210911_zy_plasma_ethcd_1.15611.15611.3	controllerType=0 controllerNumber=1 scan=15611	69.8306
02484:3	24	K.FVEGSHN[+1710.598]STVSLTTK.N	HexNAc(3)Hex(5)NeuAc(1)	N[+1711]	1106.47	3	3317.4	3317.4	0	-1.8	3405	Specific	461.63	215.28	215.28	6.42	9	>sp|P04114|APOB_HUMAN Apolipoprotein B-100 OS=Homo sapiens OX=9606 GN=APOB PE=1 SV=2	6234	20210911_zy_plasma_ethcd_1.2732.2732.3	controllerType=0 controllerNumber=1 scan=2732	12.2226
12772:3	10	K.C[+57.021]GLVPVLAENYN[+2204.772]K.S	HexNAc(4)Hex(5)NeuAc(2)	C[+57], N[+2205]	1227.84	3	3681.51	3681.52	0	-2.4	421	Specific	462.27	317.51	317.51	6.54	25	>sp|TRFE_HUMAN|(Common contaminant protein)	20484	20210911_zy_plasma_ethcd_1.14007.14007.3	controllerType=0 controllerNumber=1 scan=14007	62.7412
12741:3	12	R.QDQC[+57.021]IYN[+3226.132]TTYLNVQR.E	HexNAc(6)Hex(7)NeuAc(3)	C[+57], N[+3226]	1714.68	3	5142.03	5142.03	0	0.2	87	Specific	462.68	325.54	325.54	5.37	28	>sp|P02763|A1AG1_HUMAN Alpha-1-acid glycoprotein 1 OS=Homo sapiens OX=9606 GN=ORM1 PE=1 SV=1	2208	20210911_zy_plasma_ethcd_1.13973.13973.3	controllerType=0 controllerNumber=1 scan=13973	62.5909
12238:3	18	R.QNQC[+57.021]FYN[+3007.058]SSYLNVQR.E	HexNAc(5)Hex(6)Fuc(1)NeuAc(3)	C[+57], N[+3007]	1643.31	3	4927.92	4927.92	0	-0.7	87	Specific	462.94	288.39	288.39	5.59	17	>sp|P19652|A1AG2_HUMAN Alpha-1-acid glycoprotein 2 OS=Homo sapiens OX=9606 GN=ORM2 PE=1 SV=2	4531	20210911_zy_plasma_ethcd_1.13423.13423.3	controllerType=0 controllerNumber=1 scan=13423	60.1458
02921:3	6	K.TPLTAN[+2059.735]ITK.S	HexNAc(4)Hex(5)Fuc(1)NeuAc(1)	N[+2060]	1006.77	3	3018.29	3018.29	0	-1.7	200	Specific	463.28	171.48	171.48	5.84	32	>sp|P01877|IGHA2_HUMAN Immunoglobulin heavy constant alpha 2 OS=Homo sapiens OX=9606 GN=IGHA2 PE=1 SV=4	10403	20210911_zy_plasma_ethcd_1.3211.3211.3	controllerType=0 controllerNumber=1 scan=3211	14.3542
04176:3	13	K.IPC[+57.021]SQPPQIEHGTIN[+2204.772]SSR.S	HexNAc(4)Hex(5)NeuAc(2)	C[+57], N[+2205]	1409.26	3	4225.75	4225.76	0	-1.7	868	Specific	463.73	293.68	293.68	6.58	16	>sp|P08603|CFAH_HUMAN Complement factor H OS=Homo sapiens OX=9606 GN=CFH PE=1 SV=4	385	20210911_zy_plasma_ethcd_1.4585.4585.4	controllerType=0 controllerNumber=1 scan=4585	20.4673
13374:3	1	K.VVLHPN[+2350.830]YSQVDIGLIK.L	HexNAc(4)Hex(5)Fuc(1)NeuAc(2)	N[+2351]	1382.61	3	4145.83	4145.84	0	-2.7	236	Specific	463.82	309.03	309.03	6.58	163	>sp|P00738|HPT_HUMAN Haptoglobin OS=Homo sapiens OX=9606 GN=HP PE=1 SV=1	3044	20210911_zy_plasma_ethcd_1.14665.14665.3	controllerType=0 controllerNumber=1 scan=14665	65.6409
09256:3	3	R.GTAGNALMDGASQLM[+15.995]GEN[+2204.772]R.T	HexNAc(4)Hex(5)NeuAc(2)	M[+16], N[+2205]	1371.88	3	4113.62	4113.63	0	-1.7	377	Specific	464.45	319.16	193.4	6.46	38	>sp|P02675|FIBB_HUMAN Fibrinogen beta chain OS=Homo sapiens OX=9606 GN=FGB PE=1 SV=2	6006	20210911_zy_plasma_ethcd_1.10151.10151.3	controllerType=0 controllerNumber=1 scan=10151	45.342
11442:3	1	K.VVLHPN[+2278.809]YSQVDIGLIK.L	HexNAc(5)Hex(6)NeuAc(1)	N[+2279]	1358.61	3	4073.81	4073.82	0	-1.9	236	Specific	464.51	297.24	297.24	6.38	163	>sp|P00738|HPT_HUMAN Haptoglobin OS=Homo sapiens OX=9606 GN=HP PE=1 SV=1	3044	20210911_zy_plasma_ethcd_1.12549.12549.3	controllerType=0 controllerNumber=1 scan=12549	56.1737
06755:3	3	K.YRGTAGNALM[+15.995]DGASQLMGEN[+1913.677]R.T	HexNAc(4)Hex(5)NeuAc(1)	M[+16], N[+1914]	1381.23	3	4141.69	4141.7	0	-2.1	375	Specific	466.6	326.72	133.91	7.04	38	>sp|P02675|FIBB_HUMAN Fibrinogen beta chain OS=Homo sapiens OX=9606 GN=FGB PE=1 SV=2	6006	20210911_zy_plasma_ethcd_1.7409.7409.3	controllerType=0 controllerNumber=1 scan=7409	32.9835
10187:3	3	K.YRGTAGNALMDGASQLMGEN[+1913.677]R.T	HexNAc(4)Hex(5)NeuAc(1)	N[+1914]	1375.9	3	4125.69	4125.7	0	-1.7	375	Specific	468.46	354.24	83.67	6.93	38	>sp|P02675|FIBB_HUMAN Fibrinogen beta chain OS=Homo sapiens OX=9606 GN=FGB PE=1 SV=2	6006	20210911_zy_plasma_ethcd_1.11173.11173.3	controllerType=0 controllerNumber=1 scan=11173	49.9859
04225:4	13	K.IPC[+57.021]SQPPQIEHGTIN[+2204.772]SSR.S	HexNAc(4)Hex(5)NeuAc(2)	C[+57], N[+2205]	1057.19	4	4225.74	4225.76	0	-3.4	868	Specific	469.16	340.01	340.01	6.49	16	>sp|P08603|CFAH_HUMAN Complement factor H OS=Homo sapiens OX=9606 GN=CFH PE=1 SV=4	385	20210911_zy_plasma_ethcd_1.4639.4639.4	controllerType=0 controllerNumber=1 scan=4639	20.7031
14406:3	21	K.VC[+57.021]QDC[+57.021]PLLAPLN[+2861.000]DTR.V	HexNAc(5)Hex(6)NeuAc(3)	C[+57]*2, N[+2861]	1544.95	3	4632.84	4632.85	0	-2	145	Specific	469.99	297.6	297.6	6.31	12	>sp|P02765|FETUA_HUMAN Alpha-2-HS-glycoprotein OS=Homo sapiens OX=9606 GN=AHSG PE=1 SV=2	4627	20210911_zy_plasma_ethcd_1.15795.15795.3	controllerType=0 controllerNumber=1 scan=15795	70.6444
05434:3	4	K.EHEGAIYPDN[+2204.772]TTDFQR.A	HexNAc(4)Hex(5)NeuAc(2)	N[+2205]	1366.54	3	4097.6	4097.61	0	-2.2	129	Specific	471.79	328.13	328.13	6.56	22	>sp|P00450|CERU_HUMAN Ceruloplasmin OS=Homo sapiens OX=9606 GN=CP PE=1 SV=1	460	20210911_zy_plasma_ethcd_1.5963.5963.3	controllerType=0 controllerNumber=1 scan=5963	26.6033
12653:3	12	R.QDQC[+57.021]IYN[+2861.000]TTYLNVQR.E	HexNAc(5)Hex(6)NeuAc(3)	C[+57], N[+2861]	1592.97	3	4776.88	4776.9	0	-2.6	87	Specific	472.1	330.08	330.08	6.5	28	>sp|P02763|A1AG1_HUMAN Alpha-1-acid glycoprotein 1 OS=Homo sapiens OX=9606 GN=ORM1 PE=1 SV=1	2208	20210911_zy_plasma_ethcd_1.13877.13877.3	controllerType=0 controllerNumber=1 scan=13877	62.1645
01406:2	5	R.EEQYN[+1606.587]STYR.V	HexNAc(4)Hex(4)Fuc(1)	N[+1607]	1398.55	2	2796.09	2796.1	0	-2.1	295	Specific	472.43	247.31	247.31	6.01	45	>sp|P0DOX5|IGG1_HUMAN Immunoglobulin gamma-1 heavy chain OS=Homo sapiens OX=9606 PE=1 SV=2	10252	20210911_zy_plasma_ethcd_1.1553.1553.2	controllerType=0 controllerNumber=1 scan=1553	7.123
02412:3	7	K.PREEQFN[+2059.735]STFR.V	HexNAc(4)Hex(5)Fuc(1)NeuAc(1)	N[+2060]	1157.47	3	3470.4	3470.41	0	-2.9	170	Specific	472.58	220.15	220.15	5.87	35	>sp|P01859|IGHG2_HUMAN Immunoglobulin heavy constant gamma 2 OS=Homo sapiens OX=9606 GN=IGHG2 PE=1 SV=2	2858	20210911_zy_plasma_ethcd_1.2653.2653.3	controllerType=0 controllerNumber=1 scan=2653	11.8773
13382:3	1	K.VVLHPN[+2350.830]YSQVDIGLIK.L	HexNAc(4)Hex(5)Fuc(1)NeuAc(2)	N[+2351]	1382.62	3	4145.83	4145.84	0	-2.3	236	Specific	473.54	316.83	316.83	6.58	163	>sp|P00738|HPT_HUMAN Haptoglobin OS=Homo sapiens OX=9606 GN=HP PE=1 SV=1	3044	20210911_zy_plasma_ethcd_1.14674.14674.3	controllerType=0 controllerNumber=1 scan=14674	65.6821
07861:3	2	R.GLTFQQN[+2100.761]ASSM[+15.995]C[+57.021]VPDQDTAIR.V	HexNAc(5)Hex(4)Fuc(1)NeuAc(1)	C[+57], M[+16], N[+2101]	1485.95	3	4455.83	4455.83	0	0	203	Specific	473.8	350.45	76.9	6.39	55	>sp|P01871|IGHM_HUMAN Immunoglobulin heavy constant mu OS=Homo sapiens OX=9606 GN=IGHM PE=1 SV=4	10127	20210911_zy_plasma_ethcd_1.8619.8619.3	controllerType=0 controllerNumber=1 scan=8619	38.3295
06145:4	25	K.NN[+2204.772]ATVHEQVGGPSLTSDLQAQSK.G	HexNAc(4)Hex(5)NeuAc(2)	N[+2205]	1147.24	4	4585.93	4585.94	0	-3.3	85	Specific	473.98	392.62	392.62	7.46	10	>sp|P04004|VTNC_HUMAN Vitronectin OS=Homo sapiens OX=9606 GN=VTN PE=1 SV=1	17960	20210911_zy_plasma_ethcd_1.6741.6741.4	controllerType=0 controllerNumber=1 scan=6741	30.0411
08671:4	42	R.VYIHPFHLVIHN[+2204.772]ESTC[+57.021]EQLAK.A	HexNAc(4)Hex(5)NeuAc(2)	C[+57], N[+2205]	1185.76	4	4740.04	4740.05	0	-3.5	36	Specific	476.98	387.07	387.07	8.11	2	>sp|P01019|ANGT_HUMAN Angiotensinogen OS=Homo sapiens OX=9606 GN=AGT PE=1 SV=1	20146	20210911_zy_plasma_ethcd_1.9507.9507.4	controllerType=0 controllerNumber=1 scan=9507	42.3425
11661:3	1	K.VVLHPN[+1913.677]YSQVDIGLIK.L	HexNAc(4)Hex(5)NeuAc(1)	N[+1914]	1236.9	3	3708.68	3708.69	0	-2.2	236	Specific	477.56	255.59	255.59	6.43	163	>sp|P00738|HPT_HUMAN Haptoglobin OS=Homo sapiens OX=9606 GN=HP PE=1 SV=1	3044	20210911_zy_plasma_ethcd_1.12789.12789.4	controllerType=0 controllerNumber=1 scan=12789	57.2546
12582:4	2	R.GLTFQQN[+2553.910]ASSMC[+57.021]VPDQDTAIR.V	HexNAc(5)Hex(5)Fuc(1)NeuAc(2)	C[+57], N[+2554]	1224	4	4892.98	4892.99	0	-1.8	203	Specific	479.51	347.81	347.81	7.13	55	>sp|P01871|IGHM_HUMAN Immunoglobulin heavy constant mu OS=Homo sapiens OX=9606 GN=IGHM PE=1 SV=4	10127	20210911_zy_plasma_ethcd_1.13799.13799.4	controllerType=0 controllerNumber=1 scan=13799	61.8155
06609:3	9	K.TVLTPATNHM[+15.995]GN[+1540.529]VTFTIPANR.E	HexNAc(2)Hex(7)	M[+16], N[+1541]	1271.23	3	3811.68	3811.68	0	-1.2	74	Specific	479.7	336.44	336.44	6.95	22	>sp|P01024|CO3_HUMAN Complement C3 OS=Homo sapiens OX=9606 GN=C3 PE=1 SV=2	731	20210911_zy_plasma_ethcd_1.7249.7249.3	controllerType=0 controllerNumber=1 scan=7249	32.2744
11135:3	9	K.TVLTPATNHMGN[+1872.651]VTFTIPANR.E	HexNAc(3)Hex(6)NeuAc(1)	N[+1873]	1376.61	3	4127.8	4127.81	0	-1.5	74	Specific	480.22	290.28	290.28	6.8	22	>sp|P01024|CO3_HUMAN Complement C3 OS=Homo sapiens OX=9606 GN=C3 PE=1 SV=2	731	20210911_zy_plasma_ethcd_1.12212.12212.3	controllerType=0 controllerNumber=1 scan=12212	54.652
13853:3	4	K.AGLQAFFQVQEC[+57.021]N[+2204.772]K.S	HexNAc(4)Hex(5)NeuAc(2)	C[+57], N[+2205]	1282.19	3	3844.55	3844.56	0	-2.2	346	Specific	481.86	316.92	316.92	6.53	22	>sp|P00450|CERU_HUMAN Ceruloplasmin OS=Homo sapiens OX=9606 GN=CP PE=1 SV=1	460	20210911_zy_plasma_ethcd_1.15190.15190.3	controllerType=0 controllerNumber=1 scan=15190	67.9849
09194:3	3	R.GTAGNALMDGASQLM[+15.995]GEN[+2204.772]R.T	HexNAc(4)Hex(5)NeuAc(2)	M[+16], N[+2205]	1371.88	3	4113.62	4113.63	0	-2.6	377	Specific	486.19	344.54	195.85	6.84	38	>sp|P02675|FIBB_HUMAN Fibrinogen beta chain OS=Homo sapiens OX=9606 GN=FGB PE=1 SV=2	6006	20210911_zy_plasma_ethcd_1.10083.10083.3	controllerType=0 controllerNumber=1 scan=10083	45.0328
12270:3	3	R.GTAGNALMDGASQLMGEN[+1913.677]R.T	HexNAc(4)Hex(5)NeuAc(1)	N[+1914]	1269.51	3	3806.53	3806.54	0	-2.6	377	Specific	488.45	326.48	127.29	6.73	38	>sp|P02675|FIBB_HUMAN Fibrinogen beta chain OS=Homo sapiens OX=9606 GN=FGB PE=1 SV=2	6006	20210911_zy_plasma_ethcd_1.13458.13458.3	controllerType=0 controllerNumber=1 scan=13458	60.3018
07333:3	3	R.GTAGNALMDGASQLM[+15.995]GEN[+1913.677]R.T	HexNAc(4)Hex(5)NeuAc(1)	M[+16], N[+1914]	1274.85	3	3822.52	3822.53	0	-2.1	377	Specific	488.69	304.53	189.02	6.72	38	>sp|P02675|FIBB_HUMAN Fibrinogen beta chain OS=Homo sapiens OX=9606 GN=FGB PE=1 SV=2	6006	20210911_zy_plasma_ethcd_1.8041.8041.3	controllerType=0 controllerNumber=1 scan=8041	35.7628
09864:3	33	R.ADGTVNQIEGEATPVN[+2059.735]LTEPAK.L	HexNAc(4)Hex(5)Fuc(1)NeuAc(1)	N[+2060]	1438.62	3	4313.85	4313.85	0	-1.7	83	Specific	489.02	386.88	386.88	7.46	5	>sp|P05090|APOD_HUMAN Apolipoprotein D OS=Homo sapiens OX=9606 GN=APOD PE=1 SV=1	120	20210911_zy_plasma_ethcd_1.10818.10818.3	controllerType=0 controllerNumber=1 scan=10818	48.3593
05326:3	60	R.PVTPIAQN[+2204.772]QTTLGSSR.A	HexNAc(4)Hex(5)NeuAc(2)	N[+2205]	1292.22	3	3874.65	3874.66	0	-1.7	235	Specific	490.55	300.35	300.35	6.34	1	>sp|Q9NZP8|C1RL_HUMAN Complement C1r subcomponent-like protein OS=Homo sapiens OX=9606 GN=C1RL PE=1 SV=2	126	20210911_zy_plasma_ethcd_1.5845.5845.3	controllerType=0 controllerNumber=1 scan=5845	26.0885
00696:3	31	R.HSHNNN[+2204.772]SSDLHPHK.H	HexNAc(4)Hex(5)NeuAc(2)	N[+2205]	1276.84	3	3828.5	3828.51	0	-1.8	340	Specific	491.03	295.56	12.27	6.68	8	>sp|P04196|HRG_HUMAN Histidine-rich glycoprotein OS=Homo sapiens OX=9606 GN=HRG PE=1 SV=1	6586	20210911_zy_plasma_ethcd_1.776.776.2	controllerType=0 controllerNumber=1 scan=776	3.6942
08883:3	11	R.SWPAVGN[+2204.772]C[+57.021]SSALR.W	HexNAc(4)Hex(5)NeuAc(2)	C[+57], N[+2205]	1203.82	3	3609.43	3609.44	0	-2.6	181	Specific	491.04	239.6	239.6	6.25	28	>sp|P02790|HEMO_HUMAN Hemopexin OS=Homo sapiens OX=9606 GN=HPX PE=1 SV=2	9336	20210911_zy_plasma_ethcd_1.9741.9741.3	controllerType=0 controllerNumber=1 scan=9741	43.4358
12145:3	3	R.GTAGNALMDGASQLMGEN[+1913.677]R.T	HexNAc(4)Hex(5)NeuAc(1)	N[+1914]	1269.51	3	3806.53	3806.54	0	-2.4	377	Specific	492.06	317.9	146.38	6.74	38	>sp|P02675|FIBB_HUMAN Fibrinogen beta chain OS=Homo sapiens OX=9606 GN=FGB PE=1 SV=2	6006	20210911_zy_plasma_ethcd_1.13321.13321.3	controllerType=0 controllerNumber=1 scan=13321	59.6886
12814:3	12	R.QDQC[+57.021]IYN[+2861.000]TTYLNVQR.E	HexNAc(5)Hex(6)NeuAc(3)	C[+57], N[+2861]	1592.97	3	4776.89	4776.9	0	-1.2	87	Specific	492.08	343.56	343.56	6.4	28	>sp|P02763|A1AG1_HUMAN Alpha-1-acid glycoprotein 1 OS=Homo sapiens OX=9606 GN=ORM1 PE=1 SV=1	2208	20210911_zy_plasma_ethcd_1.14053.14053.3	controllerType=0 controllerNumber=1 scan=14053	62.9454
10926:3	11	R.SWPAVGN[+2861.000]C[+57.021]SSALR.W	HexNAc(5)Hex(6)NeuAc(3)	C[+57], N[+2861]	1422.56	3	4265.66	4265.67	0	-1.9	181	Specific	493.7	282.88	282.88	6.37	28	>sp|P02790|HEMO_HUMAN Hemopexin OS=Homo sapiens OX=9606 GN=HPX PE=1 SV=2	9336	20210911_zy_plasma_ethcd_1.11983.11983.3	controllerType=0 controllerNumber=1 scan=11983	53.6235
13835:3	18	R.QNQC[+57.021]FYN[+3517.228]SSYLNVQR.E	HexNAc(6)Hex(7)NeuAc(4)	C[+57], N[+3517]	1813.37	3	5438.08	5438.09	0	-1.9	87	Specific	493.99	345.95	345.95	6.63	17	>sp|P19652|A1AG2_HUMAN Alpha-1-acid glycoprotein 2 OS=Homo sapiens OX=9606 GN=ORM2 PE=1 SV=2	4531	20210911_zy_plasma_ethcd_1.15170.15170.3	controllerType=0 controllerNumber=1 scan=15170	67.899
02881:3	17	R.VYKPSAGN[+2350.830]NSLYR.D	HexNAc(4)Hex(5)Fuc(1)NeuAc(2)	N[+2351]	1273.86	3	3819.58	3819.58	0	-1.6	155	Specific	494	220.02	220.02	6.25	22	>sp|P02749|APOH_HUMAN Beta-2-glycoprotein 1 OS=Homo sapiens OX=9606 GN=APOH PE=1 SV=3	19971	20210911_zy_plasma_ethcd_1.3167.3167.3	controllerType=0 controllerNumber=1 scan=3167	14.1625
02045:3	6	K.HYTN[+2100.761]SSQDVTVPC[+57.021]R.V	HexNAc(5)Hex(4)Fuc(1)NeuAc(1)	C[+57], N[+2101]	1255.51	3	3764.5	3764.51	0	-2.7	89	Specific	495.46	298.92	298.92	6.43	32	>sp|P01877|IGHA2_HUMAN Immunoglobulin heavy constant alpha 2 OS=Homo sapiens OX=9606 GN=IGHA2 PE=1 SV=4	10403	20210911_zy_plasma_ethcd_1.2251.2251.3	controllerType=0 controllerNumber=1 scan=2251	10.1004
02826:3	28	K.QSVPAHFVALN[+1378.476]GSK.L	HexNAc(2)Hex(6)	N[+1378]	945.086	3	2833.24	2833.25	0	-3	611	Specific	496.45	383.9	383.9	7.37	6	>sp|P06681|CO2_HUMAN Complement C2 OS=Homo sapiens OX=9606 GN=C2 PE=1 SV=2	8379	20210911_zy_plasma_ethcd_1.3107.3107.3	controllerType=0 controllerNumber=1 scan=3107	13.8922
10450:3	3	R.GTAGNALM[+15.995]DGASQLMGEN[+2204.772]R.T	HexNAc(4)Hex(5)NeuAc(2)	M[+16], N[+2205]	1371.88	3	4113.62	4113.63	0	-2.2	377	Specific	497.27	356.93	203.53	6.82	38	>sp|P02675|FIBB_HUMAN Fibrinogen beta chain OS=Homo sapiens OX=9606 GN=FGB PE=1 SV=2	6006	20210911_zy_plasma_ethcd_1.11461.11461.3	controllerType=0 controllerNumber=1 scan=11461	51.2696
05444:3	43	R.N[+2204.772]HSC[+57.021]SEGQISIFR.Y	HexNAc(4)Hex(5)NeuAc(2)	C[+57], N[+2205]	1247.16	3	3739.47	3739.48	0	-2.1	731	Specific	497.55	266.78	266.78	6.43	5	>sp|O75882|ATRN_HUMAN Attractin OS=Homo sapiens OX=9606 GN=ATRN PE=1 SV=2	8160	20210911_zy_plasma_ethcd_1.5974.5974.3	controllerType=0 controllerNumber=1 scan=5974	26.6504
07078:3	4	K.EHEGAIYPDN[+2861.000]TTDFQR.A	HexNAc(5)Hex(6)NeuAc(3)	N[+2861]	1585.28	3	4753.84	4753.84	0	-0.4	129	Specific	499.26	355.51	355.51	5.87	22	>sp|P00450|CERU_HUMAN Ceruloplasmin OS=Homo sapiens OX=9606 GN=CP PE=1 SV=1	460	20210911_zy_plasma_ethcd_1.7762.7762.3	controllerType=0 controllerNumber=1 scan=7762	34.5349
12227:3	18	R.QNQC[+57.021]FYN[+2861.000]SSYLNVQR.E	HexNAc(5)Hex(6)NeuAc(3)	C[+57], N[+2861]	1594.29	3	4780.85	4781.87	-1	-2.8	87	Specific	500.54	337	337	6.87	17	>sp|P19652|A1AG2_HUMAN Alpha-1-acid glycoprotein 2 OS=Homo sapiens OX=9606 GN=ORM2 PE=1 SV=2	4531	20210911_zy_plasma_ethcd_1.13411.13411.3	controllerType=0 controllerNumber=1 scan=13411	60.0895
02788:3	28	K.QSVPAHFVALN[+1540.529]GSK.L	HexNAc(2)Hex(7)	N[+1541]	999.103	3	2995.29	2995.3	0	-3.2	611	Specific	502.98	377.19	377.19	6.68	6	>sp|P06681|CO2_HUMAN Complement C2 OS=Homo sapiens OX=9606 GN=C2 PE=1 SV=2	8379	20210911_zy_plasma_ethcd_1.3065.3065.3	controllerType=0 controllerNumber=1 scan=3065	13.7074
12207:3	3	R.GTAGNALMDGASQLMGEN[+1913.677]R.T	HexNAc(4)Hex(5)NeuAc(1)	N[+1914]	1269.51	3	3806.52	3806.54	0	-3	377	Specific	503.72	327.5	139.9	6.56	38	>sp|P02675|FIBB_HUMAN Fibrinogen beta chain OS=Homo sapiens OX=9606 GN=FGB PE=1 SV=2	6006	20210911_zy_plasma_ethcd_1.13389.13389.3	controllerType=0 controllerNumber=1 scan=13389	59.9918
08432:3	3	R.GTAGNALM[+15.995]DGASQLMGEN[+1913.677]R.T	HexNAc(4)Hex(5)NeuAc(1)	M[+16], N[+1914]	1274.85	3	3822.52	3822.53	0	-2.6	377	Specific	504.05	354.24	231.56	6.89	38	>sp|P02675|FIBB_HUMAN Fibrinogen beta chain OS=Homo sapiens OX=9606 GN=FGB PE=1 SV=2	6006	20210911_zy_plasma_ethcd_1.9245.9245.3	controllerType=0 controllerNumber=1 scan=9245	41.1442
04147:4	19	R.SRYPHKPEIN[+2204.772]STTHPGADLQENFC[+57.021]R.N	HexNAc(4)Hex(5)NeuAc(2)	C[+57], N[+2205]	1290.54	4	5159.15	5159.17	0	-2.9	134	Specific	504.06	431.22	431.22	7.28	7	>sp|P00734|THRB_HUMAN Prothrombin OS=Homo sapiens OX=9606 GN=F2 PE=1 SV=2	18404	20210911_zy_plasma_ethcd_1.4553.4553.4	controllerType=0 controllerNumber=1 scan=4553	20.3331
03859:3	4	K.EHEGAIYPDN[+1913.677]TTDFQR.A	HexNAc(4)Hex(5)NeuAc(1)	N[+1914]	1269.51	3	3806.51	3806.52	0	-2.1	129	Specific	505.18	308.38	308.38	6.65	22	>sp|P00450|CERU_HUMAN Ceruloplasmin OS=Homo sapiens OX=9606 GN=CP PE=1 SV=1	460	20210911_zy_plasma_ethcd_1.4238.4238.3	controllerType=0 controllerNumber=1 scan=4238	18.928
02025:3	6	K.HYTN[+2424.867]SSQDVTVPC[+57.021]R.V	HexNAc(5)Hex(6)Fuc(1)NeuAc(1)	C[+57], N[+2425]	1363.21	3	4087.61	4088.62	-1	-1.1	89	Specific	510.51	327.44	327.44	6.2	32	>sp|P01877|IGHA2_HUMAN Immunoglobulin heavy constant alpha 2 OS=Homo sapiens OX=9606 GN=IGHA2 PE=1 SV=4	10403	20210911_zy_plasma_ethcd_1.2229.2229.3	controllerType=0 controllerNumber=1 scan=2229	10.0097
03199:3	13	K.IPC[+57.021]SQPPQIEHGTIN[+1913.677]SSR.S	HexNAc(4)Hex(5)NeuAc(1)	C[+57], N[+1914]	1312.22	3	3934.66	3934.66	0	-2.2	868	Specific	514.26	309.15	309.15	6.84	16	>sp|P08603|CFAH_HUMAN Complement factor H OS=Homo sapiens OX=9606 GN=CFH PE=1 SV=4	385	20210911_zy_plasma_ethcd_1.3515.3515.3	controllerType=0 controllerNumber=1 scan=3515	15.6906
07014:3	4	K.EHEGAIYPDN[+2861.000]TTDFQR.A	HexNAc(5)Hex(6)NeuAc(3)	N[+2861]	1585.28	3	4753.83	4753.84	0	-2	129	Specific	514.59	368.31	368.31	6.87	22	>sp|P00450|CERU_HUMAN Ceruloplasmin OS=Homo sapiens OX=9606 GN=CP PE=1 SV=1	460	20210911_zy_plasma_ethcd_1.7692.7692.3	controllerType=0 controllerNumber=1 scan=7692	34.2246
10589:3	2	R.GLTFQQN[+2262.814]ASSMC[+57.021]VPDQDTAIR.V	HexNAc(5)Hex(5)Fuc(1)NeuAc(1)	C[+57], N[+2263]	1534.63	3	4601.88	4601.89	0	-3	203	Specific	517.17	387.26	94.09	7.96	55	>sp|P01871|IGHM_HUMAN Immunoglobulin heavy constant mu OS=Homo sapiens OX=9606 GN=IGHM PE=1 SV=4	10127	20210911_zy_plasma_ethcd_1.11613.11613.3	controllerType=0 controllerNumber=1 scan=11613	51.9563
14094:3	1	K.VVLHPN[+3007.058]YSQVDIGLIK.L	HexNAc(5)Hex(6)Fuc(1)NeuAc(3)	N[+3007]	1601.36	3	4802.06	4802.07	0	-1.7	236	Specific	519.92	348.07	348.07	6.75	163	>sp|P00738|HPT_HUMAN Haptoglobin OS=Homo sapiens OX=9606 GN=HP PE=1 SV=1	3044	20210911_zy_plasma_ethcd_1.15453.15453.3	controllerType=0 controllerNumber=1 scan=15453	69.136
06355:3	4	K.ELHHLQEQN[+2204.772]VSNAFLDK.G	HexNAc(4)Hex(5)NeuAc(2)	N[+2205]	1409.59	3	4226.77	4226.78	0	-2.6	754	Specific	523.52	383.33	383.33	8.09	22	>sp|P00450|CERU_HUMAN Ceruloplasmin OS=Homo sapiens OX=9606 GN=CP PE=1 SV=1	460	20210911_zy_plasma_ethcd_1.6971.6971.3	controllerType=0 controllerNumber=1 scan=6971	31.0526
13189:3	21	K.VC[+57.021]QDC[+57.021]PLLAPLN[+2204.772]DTR.V	HexNAc(4)Hex(5)NeuAc(2)	C[+57]*2, N[+2205]	1326.21	3	3976.61	3976.62	0	-2.4	145	Specific	525.05	336.22	336.22	6.61	12	>sp|P02765|FETUA_HUMAN Alpha-2-HS-glycoprotein OS=Homo sapiens OX=9606 GN=AHSG PE=1 SV=2	4627	20210911_zy_plasma_ethcd_1.14463.14463.3	controllerType=0 controllerNumber=1 scan=14463	64.7543
12645:3	12	R.QDQC[+57.021]IYN[+3007.058]TTYLNVQR.E	HexNAc(5)Hex(6)Fuc(1)NeuAc(3)	C[+57], N[+3007]	1641.65	3	4922.95	4922.95	0	-0.9	87	Specific	525.29	384.97	384.97	6.84	28	>sp|P02763|A1AG1_HUMAN Alpha-1-acid glycoprotein 1 OS=Homo sapiens OX=9606 GN=ORM1 PE=1 SV=1	2208	20210911_zy_plasma_ethcd_1.13868.13868.3	controllerType=0 controllerNumber=1 scan=13868	62.1246
02367:3	6	K.HYTN[+2553.910]SSQDVTVPC[+57.021]R.V	HexNAc(5)Hex(5)Fuc(1)NeuAc(2)	C[+57], N[+2554]	1406.56	3	4217.65	4217.66	0	-1.6	89	Specific	526.54	326.07	326.07	6.44	32	>sp|P01877|IGHA2_HUMAN Immunoglobulin heavy constant alpha 2 OS=Homo sapiens OX=9606 GN=IGHA2 PE=1 SV=4	10403	20210911_zy_plasma_ethcd_1.2604.2604.3	controllerType=0 controllerNumber=1 scan=2604	11.6703
06673:3	9	K.TVLTPATNHM[+15.995]GN[+1378.476]VTFTIPANR.E	HexNAc(2)Hex(6)	M[+16], N[+1378]	1217.21	3	3649.63	3649.63	0	-1.2	74	Specific	526.96	362.06	362.06	7.29	22	>sp|P01024|CO3_HUMAN Complement C3 OS=Homo sapiens OX=9606 GN=C3 PE=1 SV=2	731	20210911_zy_plasma_ethcd_1.7319.7319.3	controllerType=0 controllerNumber=1 scan=7319	32.581
08227:3	3	R.GTAGNALM[+15.995]DGASQLMGEN[+1913.677]R.T	HexNAc(4)Hex(5)NeuAc(1)	M[+16], N[+1914]	1274.84	3	3822.52	3822.53	0	-3.9	377	Specific	530.93	365	196.78	6.74	38	>sp|P02675|FIBB_HUMAN Fibrinogen beta chain OS=Homo sapiens OX=9606 GN=FGB PE=1 SV=2	6006	20210911_zy_plasma_ethcd_1.9020.9020.3	controllerType=0 controllerNumber=1 scan=9020	40.1266
05423:3	39	R.HFDVAHVSTAATSN[+1540.529]FSAVR.D	HexNAc(2)Hex(7)	N[+1541]	1186.51	3	3557.51	3557.52	0	-1.9	2109	Specific	533.45	420.6	420.6	8.08	4	>sp|P01266|THYG_HUMAN Thyroglobulin OS=Homo sapiens OX=9606 GN=TG PE=1 SV=5	17152	20210911_zy_plasma_ethcd_1.5951.5951.3	controllerType=0 controllerNumber=1 scan=5951	26.5518
06590:3	9	K.TVLTPATNHM[+15.995]GN[+1378.476]VTFTIPANR.E	HexNAc(2)Hex(6)	M[+16], N[+1378]	1217.21	3	3649.63	3649.63	0	-1.3	74	Specific	533.76	373.64	373.64	7.29	22	>sp|P01024|CO3_HUMAN Complement C3 OS=Homo sapiens OX=9606 GN=C3 PE=1 SV=2	731	20210911_zy_plasma_ethcd_1.7228.7228.3	controllerType=0 controllerNumber=1 scan=7228	32.1841
12313:3	18	R.QNQC[+57.021]FYN[+2861.000]SSYLNVQR.E	HexNAc(5)Hex(6)NeuAc(3)	C[+57], N[+2861]	1594.62	3	4781.86	4781.87	0	-1.8	87	Specific	538.98	406.83	406.83	7.57	17	>sp|P19652|A1AG2_HUMAN Alpha-1-acid glycoprotein 2 OS=Homo sapiens OX=9606 GN=ORM2 PE=1 SV=2	4531	20210911_zy_plasma_ethcd_1.13505.13505.3	controllerType=0 controllerNumber=1 scan=13505	60.5102
02172:4	49	R.GNVAVTVSGHTC[+57.021]QHWSAQTPHTHN[+1548.545]R.T	HexNAc(3)Hex(4)NeuAc(1)	C[+57], N[+1549]	1083.46	4	4330.83	4330.84	0	-3	285	Specific	539.78	472.62	472.62	7.45	1	>sp|P00747|PLMN_HUMAN Plasminogen OS=Homo sapiens OX=9606 GN=PLG PE=1 SV=2	15147	20210911_zy_plasma_ethcd_1.2390.2390.3	controllerType=0 controllerNumber=1 scan=2390	10.722
01990:3	7	K.PREEQFN[+1768.640]STFR.V	HexNAc(4)Hex(5)Fuc(1)	N[+1769]	1060.44	3	3179.31	3179.32	0	-2.2	170	Specific	540.05	254.04	254.04	6.19	35	>sp|P01859|IGHG2_HUMAN Immunoglobulin heavy constant gamma 2 OS=Homo sapiens OX=9606 GN=IGHG2 PE=1 SV=2	2858	20210911_zy_plasma_ethcd_1.2191.2191.3	controllerType=0 controllerNumber=1 scan=2191	9.8547
14037:4	12	R.QDQC[+57.021]IYN[+3517.228]TTYLNVQR.E	HexNAc(6)Hex(7)NeuAc(4)	C[+57], N[+3517]	1359.03	4	5433.12	5433.12	0	-1.6	87	Specific	541.75	371.84	371.84	6.95	28	>sp|P02763|A1AG1_HUMAN Alpha-1-acid glycoprotein 1 OS=Homo sapiens OX=9606 GN=ORM1 PE=1 SV=1	2208	20210911_zy_plasma_ethcd_1.15391.15391.4	controllerType=0 controllerNumber=1 scan=15391	68.8645
13214:3	21	K.VC[+57.021]QDC[+57.021]PLLAPLN[+2204.772]DTR.V	HexNAc(4)Hex(5)NeuAc(2)	C[+57]*2, N[+2205]	1326.21	3	3976.61	3976.62	0	-2.4	145	Specific	541.93	397.89	397.89	7.79	12	>sp|P02765|FETUA_HUMAN Alpha-2-HS-glycoprotein OS=Homo sapiens OX=9606 GN=AHSG PE=1 SV=2	4627	20210911_zy_plasma_ethcd_1.14490.14490.3	controllerType=0 controllerNumber=1 scan=14490	64.8728
14135:4	12	R.QDQC[+57.021]IYN[+3517.228]TTYLNVQR.E	HexNAc(6)Hex(7)NeuAc(4)	C[+57], N[+3517]	1359.03	4	5433.11	5433.12	0	-2.3	87	Specific	547.29	384.44	384.44	7.7	28	>sp|P02763|A1AG1_HUMAN Alpha-1-acid glycoprotein 1 OS=Homo sapiens OX=9606 GN=ORM1 PE=1 SV=1	2208	20210911_zy_plasma_ethcd_1.15498.15498.4	controllerType=0 controllerNumber=1 scan=15498	69.3309
08916:3	3	R.GTAGNALMDGASQLMGEN[+1913.677]R.T	HexNAc(4)Hex(5)NeuAc(1)	N[+1914]	1269.51	3	3806.53	3806.54	0	-2.6	377	Specific	548.71	372.13	154.16	7.24	38	>sp|P02675|FIBB_HUMAN Fibrinogen beta chain OS=Homo sapiens OX=9606 GN=FGB PE=1 SV=2	6006	20210911_zy_plasma_ethcd_1.9777.9777.3	controllerType=0 controllerNumber=1 scan=9777	43.5976
06153:3	25	K.NN[+2204.772]ATVHEQVGGPSLTSDLQAQSK.G	HexNAc(4)Hex(5)NeuAc(2)	N[+2205]	1529.32	3	4585.93	4585.94	0	-2	85	Specific	548.74	429.6	429.6	8.04	10	>sp|P04004|VTNC_HUMAN Vitronectin OS=Homo sapiens OX=9606 GN=VTN PE=1 SV=1	17960	20210911_zy_plasma_ethcd_1.6750.6750.3	controllerType=0 controllerNumber=1 scan=6750	30.0784
07955:4	4	K.ELHHLQEQN[+3007.058]VSNAFLDK.G	HexNAc(5)Hex(6)Fuc(1)NeuAc(3)	N[+3007]	1258.02	4	5029.05	5029.06	0	-2.2	754	Specific	551.54	452.71	452.71	8.04	22	>sp|P00450|CERU_HUMAN Ceruloplasmin OS=Homo sapiens OX=9606 GN=CP PE=1 SV=1	460	20210911_zy_plasma_ethcd_1.8721.8721.4	controllerType=0 controllerNumber=1 scan=8721	38.7816
02044:3	6	K.HYTN[+2100.761]SSQDVTVPC[+57.021]R.V	HexNAc(5)Hex(4)Fuc(1)NeuAc(1)	C[+57], N[+2101]	1255.51	3	3764.5	3764.51	0	-2	89	Specific	553.37	363.09	363.09	7.11	32	>sp|P01877|IGHA2_HUMAN Immunoglobulin heavy constant alpha 2 OS=Homo sapiens OX=9606 GN=IGHA2 PE=1 SV=4	10403	20210911_zy_plasma_ethcd_1.2249.2249.3	controllerType=0 controllerNumber=1 scan=2249	10.0944
13340:3	1	K.VVLHPN[+2204.772]YSQVDIGLIK.L	HexNAc(4)Hex(5)NeuAc(2)	N[+2205]	1333.93	3	3999.77	3999.78	0	-2.5	236	Specific	557.87	353.86	353.86	7	163	>sp|P00738|HPT_HUMAN Haptoglobin OS=Homo sapiens OX=9606 GN=HP PE=1 SV=1	3044	20210911_zy_plasma_ethcd_1.14628.14628.3	controllerType=0 controllerNumber=1 scan=14628	65.4812
02933:3	13	K.M[+15.995]DGASN[+2204.772]VTC[+57.021]INSR.W	HexNAc(4)Hex(5)NeuAc(2)	C[+57], M[+16], N[+2205]	1215.8	3	3645.38	3645.39	0	-2.5	1024	Specific	560.52	350.88	350.88	7.08	16	>sp|P08603|CFAH_HUMAN Complement factor H OS=Homo sapiens OX=9606 GN=CFH PE=1 SV=4	385	20210911_zy_plasma_ethcd_1.3224.3224.3	controllerType=0 controllerNumber=1 scan=3224	14.4106
01801:3	6	K.HYTN[+1971.719]SSQDVTVPC[+57.021]R.V	HexNAc(5)Hex(5)Fuc(1)	C[+57], N[+1972]	1212.49	3	3635.46	3635.47	0	-2.1	89	Specific	563.38	350.38	350.38	7.1	32	>sp|P01877|IGHA2_HUMAN Immunoglobulin heavy constant alpha 2 OS=Homo sapiens OX=9606 GN=IGHA2 PE=1 SV=4	10403	20210911_zy_plasma_ethcd_1.1985.1985.3	controllerType=0 controllerNumber=1 scan=1985	8.9889
07765:4	25	K.NN[+3007.058]ATVHEQVGGPSLTSDLQAQSK.G	HexNAc(5)Hex(6)Fuc(1)NeuAc(3)	N[+3007]	1347.56	4	5387.21	5388.23	-1	-2.4	85	Specific	564.74	489.77	489.77	8.39	10	>sp|P04004|VTNC_HUMAN Vitronectin OS=Homo sapiens OX=9606 GN=VTN PE=1 SV=1	17960	20210911_zy_plasma_ethcd_1.8514.8514.4	controllerType=0 controllerNumber=1 scan=8514	37.8712
14095:4	12	R.QDQC[+57.021]IYN[+3517.228]TTYLNVQR.E	HexNAc(6)Hex(7)NeuAc(4)	C[+57], N[+3517]	1359.03	4	5433.11	5433.12	0	-2.4	87	Specific	567.05	400.26	400.26	7.82	28	>sp|P02763|A1AG1_HUMAN Alpha-1-acid glycoprotein 1 OS=Homo sapiens OX=9606 GN=ORM1 PE=1 SV=1	2208	20210911_zy_plasma_ethcd_1.15454.15454.4	controllerType=0 controllerNumber=1 scan=15454	69.1406
10624:4	2	R.GLTFQQN[+2262.814]ASSMC[+57.021]VPDQDTAIR.V	HexNAc(5)Hex(5)Fuc(1)NeuAc(1)	C[+57], N[+2263]	1151.22	4	4601.88	4601.89	0	-2.9	203	Specific	570.62	415.92	94.9	8.23	55	>sp|P01871|IGHM_HUMAN Immunoglobulin heavy constant mu OS=Homo sapiens OX=9606 GN=IGHM PE=1 SV=4	10127	20210911_zy_plasma_ethcd_1.11651.11651.3	controllerType=0 controllerNumber=1 scan=11651	52.1248
02022:3	6	K.HYTN[+2262.814]SSQDVTVPC[+57.021]R.V	HexNAc(5)Hex(5)Fuc(1)NeuAc(1)	C[+57], N[+2263]	1309.52	3	3926.55	3926.56	0	-2.4	89	Specific	572.07	341.11	341.11	7.12	32	>sp|P01877|IGHA2_HUMAN Immunoglobulin heavy constant alpha 2 OS=Homo sapiens OX=9606 GN=IGHA2 PE=1 SV=4	10403	20210911_zy_plasma_ethcd_1.2226.2226.3	controllerType=0 controllerNumber=1 scan=2226	10
02890:4	6	K.HYTN[+2262.814]SSQDVTVPC[+57.021]RVPPPPPC[+57.021]C[+57.021]HPR.L	HexNAc(5)Hex(5)Fuc(1)NeuAc(1)	C[+57]*3, N[+2263]	1306.04	4	5221.16	5221.17	0	-2.5	89	Specific	575.45	489.46	489.46	8.09	32	>sp|P01877|IGHA2_HUMAN Immunoglobulin heavy constant alpha 2 OS=Homo sapiens OX=9606 GN=IGHA2 PE=1 SV=4	10403	20210911_zy_plasma_ethcd_1.3177.3177.4	controllerType=0 controllerNumber=1 scan=3177	14.2063
02001:3	6	K.HYTN[+2059.735]SSQDVTVPC[+57.021]R.V	HexNAc(4)Hex(5)Fuc(1)NeuAc(1)	C[+57], N[+2060]	1241.83	3	3723.47	3723.48	0	-2.8	89	Specific	577.33	343.1	343.1	7.12	32	>sp|P01877|IGHA2_HUMAN Immunoglobulin heavy constant alpha 2 OS=Homo sapiens OX=9606 GN=IGHA2 PE=1 SV=4	10403	20210911_zy_plasma_ethcd_1.2203.2203.3	controllerType=0 controllerNumber=1 scan=2203	9.9041
12199:3	31	R.VIDFN[+1913.677]C[+57.021]TTSSVSSALANTK.D	HexNAc(4)Hex(5)NeuAc(1)	C[+57], N[+1914]	1310.22	3	3928.65	3928.65	0	-0.8	121	Specific	578.05	430.49	430.49	7.36	8	>sp|P04196|HRG_HUMAN Histidine-rich glycoprotein OS=Homo sapiens OX=9606 GN=HRG PE=1 SV=1	6586	20210911_zy_plasma_ethcd_1.13380.13380.3	controllerType=0 controllerNumber=1 scan=13380	59.9489
07999:4	4	K.ELHHLQEQN[+2861.000]VSNAFLDK.G	HexNAc(5)Hex(6)NeuAc(3)	N[+2861]	1221.5	4	4882.99	4883	0	-2.5	754	Specific	579.42	489.69	489.69	8.17	22	>sp|P00450|CERU_HUMAN Ceruloplasmin OS=Homo sapiens OX=9606 GN=CP PE=1 SV=1	460	20210911_zy_plasma_ethcd_1.8770.8770.4	controllerType=0 controllerNumber=1 scan=8770	39.0011
07260:3	3	R.GTAGNALMDGASQLM[+15.995]GEN[+1913.677]R.T	HexNAc(4)Hex(5)NeuAc(1)	M[+16], N[+1914]	1274.85	3	3822.52	3822.53	0	-2.1	377	Specific	584.35	390.48	247.91	8.71	38	>sp|P02675|FIBB_HUMAN Fibrinogen beta chain OS=Homo sapiens OX=9606 GN=FGB PE=1 SV=2	6006	20210911_zy_plasma_ethcd_1.7961.7961.3	controllerType=0 controllerNumber=1 scan=7961	35.4124
10710:3	2	R.GLTFQQN[+2100.761]ASSMC[+57.021]VPDQDTAIR.V	HexNAc(5)Hex(4)Fuc(1)NeuAc(1)	C[+57], N[+2101]	1480.62	3	4439.83	4439.84	0	-1.3	203	Specific	585.95	450.94	450.94	8.91	55	>sp|P01871|IGHM_HUMAN Immunoglobulin heavy constant mu OS=Homo sapiens OX=9606 GN=IGHM PE=1 SV=4	10127	20210911_zy_plasma_ethcd_1.11746.11746.3	controllerType=0 controllerNumber=1 scan=11746	52.5516
06599:3	9	K.TVLTPATNHM[+15.995]GN[+1378.476]VTFTIPANR.E	HexNAc(2)Hex(6)	M[+16], N[+1378]	1217.21	3	3649.62	3649.63	0	-1.8	74	Specific	600.72	428.23	428.23	10.21	22	>sp|P01024|CO3_HUMAN Complement C3 OS=Homo sapiens OX=9606 GN=C3 PE=1 SV=2	731	20210911_zy_plasma_ethcd_1.7238.7238.3	controllerType=0 controllerNumber=1 scan=7238	32.2256
02326:3	6	K.HYTN[+2350.830]SSQDVTVPC[+57.021]R.V	HexNAc(4)Hex(5)Fuc(1)NeuAc(2)	C[+57], N[+2351]	1338.86	3	4014.57	4014.58	0	-2	89	Specific	601.98	338.58	338.58	8.61	32	>sp|P01877|IGHA2_HUMAN Immunoglobulin heavy constant alpha 2 OS=Homo sapiens OX=9606 GN=IGHA2 PE=1 SV=4	10403	20210911_zy_plasma_ethcd_1.2559.2559.3	controllerType=0 controllerNumber=1 scan=2559	11.4691
06546:3	9	K.TVLTPATNHM[+15.995]GN[+1540.529]VTFTIPANR.E	HexNAc(2)Hex(7)	M[+16], N[+1541]	1271.23	3	3811.67	3811.68	0	-2.3	74	Specific	603.46	435.89	435.89	10.22	22	>sp|P01024|CO3_HUMAN Complement C3 OS=Homo sapiens OX=9606 GN=C3 PE=1 SV=2	731	20210911_zy_plasma_ethcd_1.7180.7180.3	controllerType=0 controllerNumber=1 scan=7180	31.972
01997:3	6	K.HYTN[+2059.735]SSQDVTVPC[+57.021]R.V	HexNAc(4)Hex(5)Fuc(1)NeuAc(1)	C[+57], N[+2060]	1241.83	3	3723.48	3723.48	0	-2.2	89	Specific	609.16	362.8	362.8	8.85	32	>sp|P01877|IGHA2_HUMAN Immunoglobulin heavy constant alpha 2 OS=Homo sapiens OX=9606 GN=IGHA2 PE=1 SV=4	10403	20210911_zy_plasma_ethcd_1.2198.2198.3	controllerType=0 controllerNumber=1 scan=2198	9.887
13706:3	3	R.GTAGNALMDGASQLMGEN[+2204.772]R.T	HexNAc(4)Hex(5)NeuAc(2)	N[+2205]	1366.55	3	4097.62	4097.63	0	-2.2	377	Specific	611.95	428.21	428.21	9.71	38	>sp|P02675|FIBB_HUMAN Fibrinogen beta chain OS=Homo sapiens OX=9606 GN=FGB PE=1 SV=2	6006	20210911_zy_plasma_ethcd_1.15029.15029.3	controllerType=0 controllerNumber=1 scan=15029	67.2661
07740:3	2	R.GLTFQQN[+2262.814]ASSM[+15.995]C[+57.021]VPDQDTAIR.V	HexNAc(5)Hex(5)Fuc(1)NeuAc(1)	C[+57], M[+16], N[+2263]	1539.97	3	4617.88	4617.88	0	-0.5	203	Specific	613.3	458	162.77	9.41	55	>sp|P01871|IGHM_HUMAN Immunoglobulin heavy constant mu OS=Homo sapiens OX=9606 GN=IGHM PE=1 SV=4	10127	20210911_zy_plasma_ethcd_1.8486.8486.3	controllerType=0 controllerNumber=1 scan=8486	37.7457
09363:3	9	K.TVLTPATNHMGN[+1378.476]VTFTIPANR.E	HexNAc(2)Hex(6)	N[+1378]	1211.88	3	3633.63	3633.64	0	-2.9	74	Specific	614.19	495.16	182.14	10.01	22	>sp|P01024|CO3_HUMAN Complement C3 OS=Homo sapiens OX=9606 GN=C3 PE=1 SV=2	731	20210911_zy_plasma_ethcd_1.10268.10268.3	controllerType=0 controllerNumber=1 scan=10268	45.8636
02884:4	6	K.HYTN[+2262.814]SSQDVTVPC[+57.021]RVPPPPPC[+57.021]C[+57.021]HPR.L	HexNAc(5)Hex(5)Fuc(1)NeuAc(1)	C[+57]*3, N[+2263]	1306.05	4	5221.16	5221.17	0	-1.6	89	Specific	616.24	464.58	464.58	9.47	32	>sp|P01877|IGHA2_HUMAN Immunoglobulin heavy constant alpha 2 OS=Homo sapiens OX=9606 GN=IGHA2 PE=1 SV=4	10403	20210911_zy_plasma_ethcd_1.3170.3170.4	controllerType=0 controllerNumber=1 scan=3170	14.1762
05370:3	27	R.FSDGLESN[+1864.634]SSTQFEVK.K	HexNAc(2)Hex(9)	N[+1865]	1213.82	3	3639.44	3639.45	0	-2.1	219	Specific	618.96	513.18	513.18	9.52	7	>sp|P0C0L5|CO4B_HUMAN Complement C4-B OS=Homo sapiens OX=9606 GN=C4B PE=1 SV=2	4060	20210911_zy_plasma_ethcd_1.5893.5893.3	controllerType=0 controllerNumber=1 scan=5893	26.2964
07289:3	3	R.GTAGNALMDGASQLM[+15.995]GEN[+1913.677]R.T	HexNAc(4)Hex(5)NeuAc(1)	M[+16], N[+1914]	1274.85	3	3822.52	3822.53	0	-2.1	377	Specific	624.98	444.27	258.56	9.71	38	>sp|P02675|FIBB_HUMAN Fibrinogen beta chain OS=Homo sapiens OX=9606 GN=FGB PE=1 SV=2	6006	20210911_zy_plasma_ethcd_1.7992.7992.3	controllerType=0 controllerNumber=1 scan=7992	35.5475
05182:3	4	K.EHEGAIYPDN[+2350.830]TTDFQR.A	HexNAc(4)Hex(5)Fuc(1)NeuAc(2)	N[+2351]	1415.23	3	4243.66	4243.67	0	-1.9	129	Specific	627.55	459.05	459.05	9.59	22	>sp|P00450|CERU_HUMAN Ceruloplasmin OS=Homo sapiens OX=9606 GN=CP PE=1 SV=1	460	20210911_zy_plasma_ethcd_1.5687.5687.3	controllerType=0 controllerNumber=1 scan=5687	25.3861
09328:3	9	K.TVLTPATNHMGN[+1540.529]VTFTIPANR.E	HexNAc(2)Hex(7)	N[+1541]	1265.9	3	3795.68	3795.69	0	-1.7	74	Specific	639.28	514.59	514.59	10.21	22	>sp|P01024|CO3_HUMAN Complement C3 OS=Homo sapiens OX=9606 GN=C3 PE=1 SV=2	731	20210911_zy_plasma_ethcd_1.10230.10230.3	controllerType=0 controllerNumber=1 scan=10230	45.6995
10617:3	2	R.GLTFQQN[+2059.735]ASSMC[+57.021]VPDQDTAIR.V	HexNAc(4)Hex(5)Fuc(1)NeuAc(1)	C[+57], N[+2060]	1466.94	3	4398.81	4398.81	0	-0.8	203	Specific	647.49	494.96	494.96	9.41	55	>sp|P01871|IGHM_HUMAN Immunoglobulin heavy constant mu OS=Homo sapiens OX=9606 GN=IGHM PE=1 SV=4	10127	20210911_zy_plasma_ethcd_1.11644.11644.3	controllerType=0 controllerNumber=1 scan=11644	52.0925
05304:3	4	K.EHEGAIYPDN[+2204.772]TTDFQR.A	HexNAc(4)Hex(5)NeuAc(2)	N[+2205]	1366.54	3	4097.6	4097.61	0	-2.1	129	Specific	648.47	483.03	483.03	9.59	22	>sp|P00450|CERU_HUMAN Ceruloplasmin OS=Homo sapiens OX=9606 GN=CP PE=1 SV=1	460	20210911_zy_plasma_ethcd_1.5821.5821.3	controllerType=0 controllerNumber=1 scan=5821	25.9847
14256:4	4	K.EN[+3007.058]LTAPGSDSAVFFEQGTTR.I	HexNAc(5)Hex(6)Fuc(1)NeuAc(3)	N[+3007]	1284.27	4	5134.04	5134.06	0	-2.7	396	Specific	649.82	539.81	539.81	10.07	22	>sp|P00450|CERU_HUMAN Ceruloplasmin OS=Homo sapiens OX=9606 GN=CP PE=1 SV=1	460	20210911_zy_plasma_ethcd_1.15631.15631.4	controllerType=0 controllerNumber=1 scan=15631	69.9177
01324:4	16	K.TKPREEQFN[+1768.640]STYR.V	HexNAc(4)Hex(5)Fuc(1)	N[+1769]	856.866	4	3424.44	3424.45	0	-2.8	169	Specific	652.34	256.5	256.5	9.05	25	>sp|P01861|IGHG4_HUMAN Immunoglobulin heavy constant gamma 4 OS=Homo sapiens OX=9606 GN=IGHG4 PE=1 SV=1	12793	20210911_zy_plasma_ethcd_1.1463.1463.4	controllerType=0 controllerNumber=1 scan=1463	6.7271
05285:3	4	K.EHEGAIYPDN[+2204.772]TTDFQR.A	HexNAc(4)Hex(5)NeuAc(2)	N[+2205]	1366.54	3	4097.61	4097.61	0	-2	129	Specific	653.51	491.48	491.48	10.59	22	>sp|P00450|CERU_HUMAN Ceruloplasmin OS=Homo sapiens OX=9606 GN=CP PE=1 SV=1	460	20210911_zy_plasma_ethcd_1.5800.5800.3	controllerType=0 controllerNumber=1 scan=5800	25.8887
07786:3	2	R.GLTFQQN[+2059.735]ASSM[+15.995]C[+57.021]VPDQDTAIR.V	HexNAc(4)Hex(5)Fuc(1)NeuAc(1)	C[+57], M[+16], N[+2060]	1472.27	3	4414.8	4414.81	0	-1.4	203	Specific	671.42	521.22	132.13	10.91	55	>sp|P01871|IGHM_HUMAN Immunoglobulin heavy constant mu OS=Homo sapiens OX=9606 GN=IGHM PE=1 SV=4	10127	20210911_zy_plasma_ethcd_1.8537.8537.3	controllerType=0 controllerNumber=1 scan=8537	37.9703
14308:4	1	K.M[+15.995]VSHHN[+2861.000]LTTGATLINEQWLLTTAK.N	HexNAc(5)Hex(6)NeuAc(3)	M[+16], N[+2861]	1389.85	4	5556.39	5556.39	0	-0.2	179	Specific	673.28	587.92	222.1	9.95	163	>sp|P00738|HPT_HUMAN Haptoglobin OS=Homo sapiens OX=9606 GN=HP PE=1 SV=1	3044	20210911_zy_plasma_ethcd_1.15688.15688.4	controllerType=0 controllerNumber=1 scan=15688	70.1717
01759:4	7	K.TKPREEQFN[+1809.666]STFR.V	HexNAc(5)Hex(4)Fuc(1)	N[+1810]	863.125	4	3449.48	3449.48	0	-2.4	168	Specific	677.89	481.05	481.05	10.15	35	>sp|P01859|IGHG2_HUMAN Immunoglobulin heavy constant gamma 2 OS=Homo sapiens OX=9606 GN=IGHG2 PE=1 SV=2	2858	20210911_zy_plasma_ethcd_1.1939.1939.4	controllerType=0 controllerNumber=1 scan=1939	8.7877
13983:3	10	R.QQQHLFGSN[+2204.772]VTDC[+57.021]SGNFC[+57.021]LFR.S	HexNAc(4)Hex(5)NeuAc(2)	C[+57]*2, N[+2205]	1573.97	3	4719.88	4719.9	0	-2.5	622	Specific	692.31	520.84	520.84	11.22	25	>sp|TRFE_HUMAN|(Common contaminant protein)	20484	20210911_zy_plasma_ethcd_1.15332.15332.3	controllerType=0 controllerNumber=1 scan=15332	68.6053
07775:3	2	R.GLTFQQN[+2262.814]ASSM[+15.995]C[+57.021]VPDQDTAIR.V	HexNAc(5)Hex(5)Fuc(1)NeuAc(1)	C[+57], M[+16], N[+2263]	1539.96	3	4617.88	4617.88	0	-1.1	203	Specific	696.84	533.64	166.3	10.41	55	>sp|P01871|IGHM_HUMAN Immunoglobulin heavy constant mu OS=Homo sapiens OX=9606 GN=IGHM PE=1 SV=4	10127	20210911_zy_plasma_ethcd_1.8525.8525.3	controllerType=0 controllerNumber=1 scan=8525	37.9174
02893:4	6	K.HYTN[+2059.735]SSQDVTVPC[+57.021]RVPPPPPC[+57.021]C[+57.021]HPR.L	HexNAc(4)Hex(5)Fuc(1)NeuAc(1)	C[+57]*3, N[+2060]	1255.28	4	5018.08	5018.09	0	-1.5	89	Specific	704.79	574.05	574.05	11.47	32	>sp|P01877|IGHA2_HUMAN Immunoglobulin heavy constant alpha 2 OS=Homo sapiens OX=9606 GN=IGHA2 PE=1 SV=4	10403	20210911_zy_plasma_ethcd_1.3180.3180.4	controllerType=0 controllerNumber=1 scan=3180	14.2205
05273:4	19	R.YPHKPEIN[+2204.772]STTHPGADLQENFC[+57.021]R.N	HexNAc(4)Hex(5)NeuAc(2)	C[+57], N[+2205]	1229.76	4	4916.03	4916.04	0	-1.6	136	Specific	728.29	627.2	627.2	11.79	7	>sp|P00734|THRB_HUMAN Prothrombin OS=Homo sapiens OX=9606 GN=F2 PE=1 SV=2	18404	20210911_zy_plasma_ethcd_1.5787.5787.4	controllerType=0 controllerNumber=1 scan=5787	25.8312
13696:4	1	K.M[+15.995]VSHHN[+2204.772]LTTGATLINEQWLLTTAK.N	HexNAc(4)Hex(5)NeuAc(2)	M[+16], N[+2205]	1225.79	4	4900.15	4900.16	0	-2	179	Specific	745.91	633.3	237.23	11.78	163	>sp|P00738|HPT_HUMAN Haptoglobin OS=Homo sapiens OX=9606 GN=HP PE=1 SV=1	3044	20210911_zy_plasma_ethcd_1.15018.15018.4	controllerType=0 controllerNumber=1 scan=15018	67.2197
10605:3	2	R.GLTFQQN[+2262.814]ASSMC[+57.021]VPDQDTAIR.V	HexNAc(5)Hex(5)Fuc(1)NeuAc(1)	C[+57], N[+2263]	1534.63	3	4601.88	4601.89	0	-1.6	203	Specific	752.08	591.28	177.04	12.91	55	>sp|P01871|IGHM_HUMAN Immunoglobulin heavy constant mu OS=Homo sapiens OX=9606 GN=IGHM PE=1 SV=4	10127	20210911_zy_plasma_ethcd_1.11631.11631.3	controllerType=0 controllerNumber=1 scan=11631	52.033
04172:4	19	R.SRYPHKPEIN[+2204.772]STTHPGADLQENFC[+57.021]R.N	HexNAc(4)Hex(5)NeuAc(2)	C[+57], N[+2205]	1290.55	4	5159.16	5159.17	0	-1	134	Specific	795.57	717.62	717.62	11.73	7	>sp|P00734|THRB_HUMAN Prothrombin OS=Homo sapiens OX=9606 GN=F2 PE=1 SV=2	18404	20210911_zy_plasma_ethcd_1.4581.4581.4	controllerType=0 controllerNumber=1 scan=4581	20.4491

## Sheet: EThcD-R2
Query #:z	Protein Rank	Peptide < ProteinMetrics Confidential >	Glycans NHFAGNa	Modification Type(s)	Observed m/z	z	Observed (M+H)	Calc. mass (M+H)	Off-by-x error	Mass error (ppm)	Starting position	Cleavage	Score	Delta	Delta Mod	|Log Prob|	# of unique peptides	Protein Name	Protein DB number	Comment	Scan #	Scan Time
12276:3	6	R.GTAGNALMDGASQLMGEN[+1751.624]R.T	HexNAc(4)Hex(4)NeuAc(1)	N[+1752]	1215.5	3	3644.48	3644.48	0	-2	377	Specific	200.15	81.93	81.93	4.61	33	>sp|P02675|FIBB_HUMAN Fibrinogen beta chain OS=Homo sapiens OX=9606 GN=FGB PE=1 SV=2	6006	20210911_zy_plasma_ethcd_2.13465.13465.3	controllerType=0 controllerNumber=1 scan=13465	60.543
05652:3	90	K.EGHFYYN[+2059.735]ISEVK.V	HexNAc(4)Hex(5)Fuc(1)NeuAc(1)	N[+2060]	1182.48	3	3545.44	3545.44	0	0.4	58	Specific	200.34	77.26	77.26	0.8	3	>sp|P55058|PLTP_HUMAN Phospholipid transfer protein OS=Homo sapiens OX=9606 GN=PLTP PE=1 SV=1	11930	20210911_zy_plasma_ethcd_2.6203.6203.3	controllerType=0 controllerNumber=1 scan=6203	27.8835
10533:3	2	R.GLTFQQN[+2278.809]ASSMC[+57.021]VPDQDTAIR.V	HexNAc(5)Hex(6)NeuAc(1)	C[+57], N[+2279]	1540.31	3	4618.91	4617.88	1	3.7	203	Specific	200.37	100.1	27.02	3.9	56	>sp|P01871|IGHM_HUMAN Immunoglobulin heavy constant mu OS=Homo sapiens OX=9606 GN=IGHM PE=1 SV=4	10127	20210911_zy_plasma_ethcd_2.11552.11552.3	controllerType=0 controllerNumber=1 scan=11552	51.8517
12157:3	20	R.IIVPLNNREN[+2204.772]ISDPTSPLR.T	HexNAc(4)Hex(5)NeuAc(2)	N[+2205]	1451.32	3	4351.94	4352.95	-1	-1.6	62	Specific	200.92	138.69	138.69	4.57	13	>sp|P01591|IGJ_HUMAN Immunoglobulin J chain OS=Homo sapiens OX=9606 GN=JCHAIN PE=1 SV=4	4401	20210911_zy_plasma_ethcd_2.13335.13335.3	controllerType=0 controllerNumber=1 scan=13335	59.9584
07130:4	1	K.NLFLN[+3663.286]HSEN[+1548.545]ATAK.D	HexNAc(6)Hex(7)Fuc(1)NeuAc(4),HexNAc(3)Hex(4)NeuAc(1)	N[+1549][+3663]	1668.4	4	6670.57	6670.56	0	1.4	203	Specific	202.02	73.76	0	2.72	151	>sp|P00738|HPT_HUMAN Haptoglobin OS=Homo sapiens OX=9606 GN=HP PE=1 SV=1	3044	20210911_zy_plasma_ethcd_2.7820.7820.4	controllerType=0 controllerNumber=1 scan=7820	35.0281
13745:3	7	K.AGLQAFFQVQEC[+57.021]N[+2350.830]K.S	HexNAc(4)Hex(5)Fuc(1)NeuAc(2)	C[+57], N[+2351]	1330.87	3	3990.61	3990.62	0	-2.6	346	Specific	202.06	67.8	67.8	4.35	24	>sp|P00450|CERU_HUMAN Ceruloplasmin OS=Homo sapiens OX=9606 GN=CP PE=1 SV=1	460	20210911_zy_plasma_ethcd_2.15075.15075.3	controllerType=0 controllerNumber=1 scan=15075	67.6741
04162:4	1	K.NLFLN[+2278.809]HSEN[+2204.772]ATAK.D	HexNAc(5)Hex(6)NeuAc(1),HexNAc(4)Hex(5)NeuAc(2)	N[+2205][+2279]	1486.33	4	5942.31	5942.32	0	-1.3	203	Specific	202.86	202.86	4.69	4.14	151	>sp|P00738|HPT_HUMAN Haptoglobin OS=Homo sapiens OX=9606 GN=HP PE=1 SV=1	3044	20210911_zy_plasma_ethcd_2.4571.4571.4	controllerType=0 controllerNumber=1 scan=4571	20.6148
01087:3	3	K.TKPREEQYN[+1444.534]STYR.V	HexNAc(4)Hex(3)Fuc(1)	N[+1445]	1039.45	3	3116.34	3116.34	0	-2.1	291	Specific	203.6	43.85	43.85	4.17	53	>sp|P0DOX5|IGG1_HUMAN Immunoglobulin gamma-1 heavy chain OS=Homo sapiens OX=9606 PE=1 SV=2	10252	20210911_zy_plasma_ethcd_2.1203.1203.3	controllerType=0 controllerNumber=1 scan=1203	5.6756
04563:3	44	R.GVNFN[+2204.772]VSK.V	HexNAc(4)Hex(5)NeuAc(2)	N[+2205]	1023.75	3	3069.22	3069.23	0	-2.8	123	Specific	203.68	41.24	41.24	2.17	9	>sp|P03952|KLKB1_HUMAN Plasma kallikrein OS=Homo sapiens OX=9606 GN=KLKB1 PE=1 SV=1	11889	20210911_zy_plasma_ethcd_2.5010.5010.3	controllerType=0 controllerNumber=1 scan=5010	22.5575
02077:3	4	K.PREEQFN[+1809.666]STFR.V	HexNAc(5)Hex(4)Fuc(1)	N[+1810]	1074.12	3	3220.34	3220.34	0	-0.9	170	Specific	203.72	116.24	116.24	3.04	36	>sp|P01859|IGHG2_HUMAN Immunoglobulin heavy constant gamma 2 OS=Homo sapiens OX=9606 GN=IGHG2 PE=1 SV=2	2858	20210911_zy_plasma_ethcd_2.2287.2287.3	controllerType=0 controllerNumber=1 scan=2287	10.4154
04984:3	1	K.NLFLN[+3007.058]HSENATAK.D	HexNAc(5)Hex(6)Fuc(1)NeuAc(3)	N[+3007]	1488.93	3	4464.78	4465.79	-1	-1.6	203	Specific	205.21	37.68	20.94	3.88	151	>sp|P00738|HPT_HUMAN Haptoglobin OS=Homo sapiens OX=9606 GN=HP PE=1 SV=1	3044	20210911_zy_plasma_ethcd_2.5471.5471.3	controllerType=0 controllerNumber=1 scan=5471	24.6234
06482:3	7	K.ELHHLQEQN[+2204.772]VSNAFLDK.G	HexNAc(4)Hex(5)NeuAc(2)	N[+2205]	1409.26	3	4225.76	4226.78	-1	-3.6	754	Specific	205.35	79.76	79.76	4.9	24	>sp|P00450|CERU_HUMAN Ceruloplasmin OS=Homo sapiens OX=9606 GN=CP PE=1 SV=1	460	20210911_zy_plasma_ethcd_2.7110.7110.3	controllerType=0 controllerNumber=1 scan=7110	31.8717
06537:3	6	R.GTAGNALM[+15.995]DGASQLMGEN[+1622.582]R.T	HexNAc(4)Hex(5)	M[+16], N[+1623]	1177.81	3	3531.42	3531.44	0	-3	377	Specific	205.69	103.8	96.34	4.63	33	>sp|P02675|FIBB_HUMAN Fibrinogen beta chain OS=Homo sapiens OX=9606 GN=FGB PE=1 SV=2	6006	20210911_zy_plasma_ethcd_2.7170.7170.3	controllerType=0 controllerNumber=1 scan=7170	32.133
03502:2	4	R.EEQFN[+1241.454]STFR.V	HexNAc(3)Hex(3)Fuc(1)	N[+1241]	1199.99	2	2398.97	2398.98	0	-1.3	172	Specific	205.79	78.15	78.15	3.89	36	>sp|P01859|IGHG2_HUMAN Immunoglobulin heavy constant gamma 2 OS=Homo sapiens OX=9606 GN=IGHG2 PE=1 SV=2	2858	20210911_zy_plasma_ethcd_2.3848.3848.2	controllerType=0 controllerNumber=1 scan=3848	17.3924
12646:4	17	R.HGIQYFNN[+2861.000]NTQHSSLFM[+15.995]LNEVK.R	HexNAc(5)Hex(6)NeuAc(3)	M[+16], N[+2861]	1375.32	4	5498.25	5498.25	0	-1	162	Specific	205.87	156.2	81.19	4.56	18	>sp|P01042|KNG1_HUMAN Kininogen-1 OS=Homo sapiens OX=9606 GN=KNG1 PE=1 SV=2	6533	20210911_zy_plasma_ethcd_2.13870.13870.4	controllerType=0 controllerNumber=1 scan=13870	62.3286
05367:4	7	K.EHEGAIYPDN[+2204.772]TTDFQR.A	HexNAc(4)Hex(5)NeuAc(2)	N[+2205]	1025.16	4	4097.6	4097.61	0	-2.2	129	Specific	205.94	142.62	142.62	4.61	24	>sp|P00450|CERU_HUMAN Ceruloplasmin OS=Homo sapiens OX=9606 GN=CP PE=1 SV=1	460	20210911_zy_plasma_ethcd_2.5890.5890.4	controllerType=0 controllerNumber=1 scan=5890	26.4818
08991:3	11	R.SWPAVGN[+2204.772]C[+57.021]SSALR.W	HexNAc(4)Hex(5)NeuAc(2)	C[+57], N[+2205]	1203.82	3	3609.44	3609.44	0	-1	181	Specific	206.51	71.9	71.9	3.93	25	>sp|P02790|HEMO_HUMAN Hemopexin OS=Homo sapiens OX=9606 GN=HPX PE=1 SV=2	9336	20210911_zy_plasma_ethcd_2.9861.9861.3	controllerType=0 controllerNumber=1 scan=9861	44.1932
01127:3	3	K.TKPREEQYN[+1647.613]STYR.V	HexNAc(5)Hex(3)Fuc(1)	N[+1648]	1107.14	3	3319.41	3319.42	0	-3	291	Specific	207.33	29.06	29.06	2.76	53	>sp|P0DOX5|IGG1_HUMAN Immunoglobulin gamma-1 heavy chain OS=Homo sapiens OX=9606 PE=1 SV=2	10252	20210911_zy_plasma_ethcd_2.1247.1247.3	controllerType=0 controllerNumber=1 scan=1247	5.8757
03012:5	5	K.HYTN[+2059.735]SSQDVTVPC[+57.021]RVPPPPPC[+57.021]C[+57.021]HPR.L	HexNAc(4)Hex(5)Fuc(1)NeuAc(1)	C[+57]*3, N[+2060]	1004.22	5	5017.07	5018.09	-1	-3.2	89	Specific	207.73	137.32	137.32	4.49	33	>sp|P01877|IGHA2_HUMAN Immunoglobulin heavy constant alpha 2 OS=Homo sapiens OX=9606 GN=IGHA2 PE=1 SV=4	10403	20210911_zy_plasma_ethcd_2.3311.3311.5	controllerType=0 controllerNumber=1 scan=3311	14.986
00939:3	3	K.TKPREEQYN[+1095.397]STYR.V	HexNAc(3)Hex(3)	N[+1095]	923.072	3	2767.2	2767.21	0	-1.2	291	Specific	208.44	133.43	133.43	3.97	53	>sp|P0DOX5|IGG1_HUMAN Immunoglobulin gamma-1 heavy chain OS=Homo sapiens OX=9606 PE=1 SV=2	10252	20210911_zy_plasma_ethcd_2.1041.1041.3	controllerType=0 controllerNumber=1 scan=1041	4.9452
06722:4	6	K.YRGTAGNALM[+15.995]DGASQLMGEN[+1913.677]R.T	HexNAc(4)Hex(5)NeuAc(1)	M[+16], N[+1914]	1036.18	4	4141.69	4141.7	0	-1	375	Specific	208.76	156.32	106.71	4.45	33	>sp|P02675|FIBB_HUMAN Fibrinogen beta chain OS=Homo sapiens OX=9606 GN=FGB PE=1 SV=2	6006	20210911_zy_plasma_ethcd_2.7373.7373.4	controllerType=0 controllerNumber=1 scan=7373	33.0292
01901:3	8	R.NEEYN[+3007.058]K.S	HexNAc(5)Hex(6)Fuc(1)NeuAc(3)	N[+3007]	1268.47	3	3803.41	3803.41	0	0.2	52	Specific	208.89	36.16	36.16	1.31	30	>sp|P02763|A1AG1_HUMAN Alpha-1-acid glycoprotein 1 OS=Homo sapiens OX=9606 GN=ORM1 PE=1 SV=1	2208	20210911_zy_plasma_ethcd_2.2095.2095.3	controllerType=0 controllerNumber=1 scan=2095	9.6015
01999:3	5	K.HYTN[+2278.809]SSQDVTVPC[+57.021]R.V	HexNAc(5)Hex(6)NeuAc(1)	C[+57], N[+2279]	1314.85	3	3942.55	3942.56	0	-2.9	89	Specific	208.98	39.73	39.73	3.91	33	>sp|P01877|IGHA2_HUMAN Immunoglobulin heavy constant alpha 2 OS=Homo sapiens OX=9606 GN=IGHA2 PE=1 SV=4	10403	20210911_zy_plasma_ethcd_2.2202.2202.3	controllerType=0 controllerNumber=1 scan=2202	10.0616
07656:4	1	K.NLFLN[+2861.000]HSEN[+2204.772]ATAK.D	HexNAc(5)Hex(6)NeuAc(3),HexNAc(4)Hex(5)NeuAc(2)	N[+2205][+2861]	1632.13	4	6525.51	6524.51	1	-0.6	203	Specific	209.91	209.91	0	3.95	151	>sp|P00738|HPT_HUMAN Haptoglobin OS=Homo sapiens OX=9606 GN=HP PE=1 SV=1	3044	20210911_zy_plasma_ethcd_2.8396.8396.4	controllerType=0 controllerNumber=1 scan=8396	37.5846
05467:3	31	R.FSDGLESN[+1702.581]SSTQFEVK.K	HexNAc(2)Hex(8)	N[+1703]	1159.8	3	3477.39	3477.39	0	-1	219	Specific	210.13	147.05	147.05	4.12	4	>sp|P0C0L5|CO4B_HUMAN Complement C4-B OS=Homo sapiens OX=9606 GN=C4B PE=1 SV=2	4060	20210911_zy_plasma_ethcd_2.6000.6000.3	controllerType=0 controllerNumber=1 scan=6000	26.9763
02285:2	53	R.N[+2059.735]YTLTGR.D	HexNAc(4)Hex(5)Fuc(1)NeuAc(1)	N[+2060]	1442.58	2	2884.16	2884.16	0	-1.4	754	Specific	210.23	44.82	44.82	2.6	5	>sp|P10643|CO7_HUMAN Complement component C7 OS=Homo sapiens OX=9606 GN=C7 PE=1 SV=2	4350	20210911_zy_plasma_ethcd_2.2515.2515.2	controllerType=0 controllerNumber=1 scan=2515	11.4378
06355:3	6	R.GTAGNALM[+15.995]DGASQLMGEN[+1913.677]R.T	HexNAc(4)Hex(5)NeuAc(1)	M[+16], N[+1914]	1274.85	3	3822.52	3822.53	0	-2.6	377	Specific	210.43	66.1	66.1	4.64	33	>sp|P02675|FIBB_HUMAN Fibrinogen beta chain OS=Homo sapiens OX=9606 GN=FGB PE=1 SV=2	6006	20210911_zy_plasma_ethcd_2.6971.6971.3	controllerType=0 controllerNumber=1 scan=6971	31.2654
02054:3	4	K.TKPREEQFN[+1897.682]STFR.V	HexNAc(4)Hex(4)Fuc(1)NeuAc(1)	N[+1898]	1179.83	3	3537.49	3537.5	0	-4.3	168	Specific	210.69	79.48	79.48	4.41	36	>sp|P01859|IGHG2_HUMAN Immunoglobulin heavy constant gamma 2 OS=Homo sapiens OX=9606 GN=IGHG2 PE=1 SV=2	2858	20210911_zy_plasma_ethcd_2.2262.2262.3	controllerType=0 controllerNumber=1 scan=2262	10.3132
02655:2	4	R.EEQFN[+1809.666]STFR.V	HexNAc(5)Hex(4)Fuc(1)	N[+1810]	1484.09	2	2967.18	2967.19	0	-2.3	172	Specific	210.79	18.73	18.73	1.6	36	>sp|P01859|IGHG2_HUMAN Immunoglobulin heavy constant gamma 2 OS=Homo sapiens OX=9606 GN=IGHG2 PE=1 SV=2	2858	20210911_zy_plasma_ethcd_2.2920.2920.3	controllerType=0 controllerNumber=1 scan=2920	13.2438
07751:4	1	K.NLFLN[+3147.115]HSEN[+1946.687]ATAK.D	HexNAc(6)Hex(11)Fuc(1),HexNAc(4)Hex(7)	N[+1947][+3147]	1638.88	4	6552.5	6552.54	0	-6	203	Specific	211.23	90.83	0	4.09	151	>sp|P00738|HPT_HUMAN Haptoglobin OS=Homo sapiens OX=9606 GN=HP PE=1 SV=1	3044	20210911_zy_plasma_ethcd_2.8500.8500.4	controllerType=0 controllerNumber=1 scan=8500	38.0393
14071:3	8	R.QDQC[+57.021]IYN[+3517.228]TTYLNVQR.E	HexNAc(6)Hex(7)NeuAc(4)	C[+57], N[+3517]	1811.71	3	5433.11	5433.12	0	-1.9	87	Specific	211.3	81.67	81.67	4.54	30	>sp|P02763|A1AG1_HUMAN Alpha-1-acid glycoprotein 1 OS=Homo sapiens OX=9606 GN=ORM1 PE=1 SV=1	2208	20210911_zy_plasma_ethcd_2.15431.15431.3	controllerType=0 controllerNumber=1 scan=15431	69.2123
10672:3	2	R.GLTFQQN[+2059.735]ASSMC[+57.021]VPDQDTAIR.V	HexNAc(4)Hex(5)Fuc(1)NeuAc(1)	C[+57], N[+2060]	1466.94	3	4398.8	4398.81	0	-1.5	203	Specific	211.41	77.26	77.26	4.74	56	>sp|P01871|IGHM_HUMAN Immunoglobulin heavy constant mu OS=Homo sapiens OX=9606 GN=IGHM PE=1 SV=4	10127	20210911_zy_plasma_ethcd_2.11704.11704.3	controllerType=0 controllerNumber=1 scan=11704	52.5335
04026:3	15	R.VYKPSAGN[+3007.058]NSLYR.D	HexNAc(5)Hex(6)Fuc(1)NeuAc(3)	N[+3007]	1492.27	3	4474.81	4475.81	-1	-0.3	155	Specific	211.61	68.21	68.21	3.95	19	>sp|P02749|APOH_HUMAN Beta-2-glycoprotein 1 OS=Homo sapiens OX=9606 GN=APOH PE=1 SV=3	19971	20210911_zy_plasma_ethcd_2.4422.4422.4	controllerType=0 controllerNumber=1 scan=4422	19.9587
13421:3	1	K.VVLHPN[+2204.772]YSQVDIGLIK.L	HexNAc(4)Hex(5)NeuAc(2)	N[+2205]	1333.93	3	3999.78	3999.78	0	-1.4	236	Specific	211.67	54	54	4.18	151	>sp|P00738|HPT_HUMAN Haptoglobin OS=Homo sapiens OX=9606 GN=HP PE=1 SV=1	3044	20210911_zy_plasma_ethcd_2.14720.14720.3	controllerType=0 controllerNumber=1 scan=14720	66.0835
07447:4	1	K.NLFLN[+3229.168]HSEN[+1864.634]ATAK.D	HexNAc(8)Hex(9)Fuc(1),HexNAc(2)Hex(9)	N[+1865][+3229]	1638.88	4	6552.5	6552.54	0	-5.8	203	Specific	211.84	95.86	0	4.09	151	>sp|P00738|HPT_HUMAN Haptoglobin OS=Homo sapiens OX=9606 GN=HP PE=1 SV=1	3044	20210911_zy_plasma_ethcd_2.8167.8167.4	controllerType=0 controllerNumber=1 scan=8167	36.5588
02737:3	24	K.FVEGSHN[+1548.545]STVSLTTK.N	HexNAc(3)Hex(4)NeuAc(1)	N[+1549]	1052.45	3	3155.34	3155.35	0	-2.2	3405	Specific	211.92	27.09	27.09	4.04	10	>sp|P04114|APOB_HUMAN Apolipoprotein B-100 OS=Homo sapiens OX=9606 GN=APOB PE=1 SV=2	6234	20210911_zy_plasma_ethcd_2.3010.3010.3	controllerType=0 controllerNumber=1 scan=3010	13.6473
04172:3	32	R.FGC[+57.021]EIENN[+3007.058]R.S	HexNAc(5)Hex(6)Fuc(1)NeuAc(3)	C[+57], N[+3007]	1382.52	3	4145.55	4145.55	0	-0.9	121	Specific	211.99	59.34	59.34	2.76	6	>sp|P25311|ZA2G_HUMAN Zinc-alpha-2-glycoprotein OS=Homo sapiens OX=9606 GN=AZGP1 PE=1 SV=2	18783	20210911_zy_plasma_ethcd_2.4582.4582.3	controllerType=0 controllerNumber=1 scan=4582	20.6617
01894:2	16	R.EEQFN[+1403.507]STYR.V	HexNAc(3)Hex(4)Fuc(1)	N[+1404]	1289.01	2	2577.02	2577.02	0	-1.3	173	Specific	212.44	31.22	31.22	2.72	24	>sp|P01861|IGHG4_HUMAN Immunoglobulin heavy constant gamma 4 OS=Homo sapiens OX=9606 GN=IGHG4 PE=1 SV=1	12793	20210911_zy_plasma_ethcd_2.2087.2087.2	controllerType=0 controllerNumber=1 scan=2087	9.5654
01716:3	14	R.EN[+3372.190]GTVSR.Y	HexNAc(6)Hex(7)Fuc(1)NeuAc(3)	N[+3372]	1378.86	3	4134.56	4134.56	0	-0.3	102	Specific	212.62	42.99	42.99	1.67	18	>sp|P19652|A1AG2_HUMAN Alpha-1-acid glycoprotein 2 OS=Homo sapiens OX=9606 GN=ORM2 PE=1 SV=2	4531	20210911_zy_plasma_ethcd_2.1892.1892.3	controllerType=0 controllerNumber=1 scan=1892	8.726
01325:3	3	K.PREEQYN[+1606.587]STYR.V	HexNAc(4)Hex(4)Fuc(1)	N[+1607]	1017.09	3	3049.25	3049.25	0	-0.1	293	Specific	212.69	29.29	29.29	1.54	53	>sp|P0DOX5|IGG1_HUMAN Immunoglobulin gamma-1 heavy chain OS=Homo sapiens OX=9606 PE=1 SV=2	10252	20210911_zy_plasma_ethcd_2.1465.1465.3	controllerType=0 controllerNumber=1 scan=1465	6.8596
05709:3	6	R.GTAGNALMDGASQLM[+15.995]GEN[+2245.799]R.T	HexNAc(5)Hex(4)NeuAc(2)	M[+16], N[+2246]	1385.55	3	4154.64	4154.65	0	-2.3	377	Specific	213	119.15	119.15	4.31	33	>sp|P02675|FIBB_HUMAN Fibrinogen beta chain OS=Homo sapiens OX=9606 GN=FGB PE=1 SV=2	6006	20210911_zy_plasma_ethcd_2.6265.6265.2	controllerType=0 controllerNumber=1 scan=6265	28.1526
10244:3	8	R.QDQC[+57.021]IYN[+2715.963]TTYLNVQR.E	HexNAc(5)Hex(6)Fuc(1)NeuAc(2)	C[+57], N[+2716]	1544.62	3	4631.85	4631.86	0	-2.5	87	Specific	213	103.05	103.05	4.56	30	>sp|P02763|A1AG1_HUMAN Alpha-1-acid glycoprotein 1 OS=Homo sapiens OX=9606 GN=ORM1 PE=1 SV=1	2208	20210911_zy_plasma_ethcd_2.11235.11235.3	controllerType=0 controllerNumber=1 scan=11235	50.4326
03382:3	38	K.MFSQN[+2861.000]DTR.C	HexNAc(5)Hex(6)NeuAc(3)	N[+2861]	1287.15	3	3859.43	3859.44	0	-2.6	321	Specific	213.4	39.88	39.88	2.17	5	>sp|P02750|A2GL_HUMAN Leucine-rich alpha-2-glycoprotein OS=Homo sapiens OX=9606 GN=LRG1 PE=1 SV=2	1095	20210911_zy_plasma_ethcd_2.3716.3716.3	controllerType=0 controllerNumber=1 scan=3716	16.7954
04543:3	20	R.EN[+2262.814]ISDPTSPLR.T	HexNAc(5)Hex(5)Fuc(1)NeuAc(1)	N[+2263]	1164.48	3	3491.42	3491.43	0	-2.5	70	Specific	213.49	65.54	65.54	4.11	13	>sp|P01591|IGJ_HUMAN Immunoglobulin J chain OS=Homo sapiens OX=9606 GN=JCHAIN PE=1 SV=4	4401	20210911_zy_plasma_ethcd_2.4988.4988.3	controllerType=0 controllerNumber=1 scan=4988	22.4578
07119:4	1	K.NLFLN[+2861.000]HSEN[+2350.830]ATAK.D	HexNAc(5)Hex(6)NeuAc(3),HexNAc(4)Hex(5)Fuc(1)NeuAc(2)	N[+2351][+2861]	1668.15	4	6669.56	6670.56	-1	0.4	203	Specific	213.54	95.81	0	3.17	151	>sp|P00738|HPT_HUMAN Haptoglobin OS=Homo sapiens OX=9606 GN=HP PE=1 SV=1	3044	20210911_zy_plasma_ethcd_2.7808.7808.4	controllerType=0 controllerNumber=1 scan=7808	34.9757
13031:3	22	K.VC[+57.021]QDC[+57.021]PLLAPLN[+2350.830]DTR.V	HexNAc(4)Hex(5)Fuc(1)NeuAc(2)	C[+57]*2, N[+2351]	1374.89	3	4122.67	4122.68	0	-2	145	Specific	213.66	105.03	105.03	4.54	8	>sp|P02765|FETUA_HUMAN Alpha-2-HS-glycoprotein OS=Homo sapiens OX=9606 GN=AHSG PE=1 SV=2	4627	20210911_zy_plasma_ethcd_2.14292.14292.3	controllerType=0 controllerNumber=1 scan=14292	64.2044
12030:3	17	K.LNAENN[+2861.000]ATFYFK.I	HexNAc(5)Hex(6)NeuAc(3)	N[+2861]	1431.57	3	4292.69	4292.69	0	-1	289	Specific	214.27	85.98	85.98	3.92	18	>sp|P01042|KNG1_HUMAN Kininogen-1 OS=Homo sapiens OX=9606 GN=KNG1 PE=1 SV=2	6533	20210911_zy_plasma_ethcd_2.13196.13196.3	controllerType=0 controllerNumber=1 scan=13196	59.3289
08003:4	7	K.ELHHLQEQN[+3007.058]VSNAFLDK.G	HexNAc(5)Hex(6)Fuc(1)NeuAc(3)	N[+3007]	1258.02	4	5029.06	5029.06	0	0.2	754	Specific	214.4	190.89	190.89	3.91	24	>sp|P00450|CERU_HUMAN Ceruloplasmin OS=Homo sapiens OX=9606 GN=CP PE=1 SV=1	460	20210911_zy_plasma_ethcd_2.8776.8776.4	controllerType=0 controllerNumber=1 scan=8776	39.2722
09211:3	6	R.GTAGNALMDGASQLM[+15.995]GEN[+1913.677]R.T	HexNAc(4)Hex(5)NeuAc(1)	M[+16], N[+1914]	1274.84	3	3822.51	3822.53	0	-5	377	Specific	214.44	92.86	92.86	4.14	33	>sp|P02675|FIBB_HUMAN Fibrinogen beta chain OS=Homo sapiens OX=9606 GN=FGB PE=1 SV=2	6006	20210911_zy_plasma_ethcd_2.10102.10102.3	controllerType=0 controllerNumber=1 scan=10102	45.3241
03344:3	4	R.EEQFN[+2221.788]STFR.V	HexNAc(4)Hex(6)Fuc(1)NeuAc(1)	N[+2222]	1127.11	3	3379.3	3379.31	0	-2.6	172	Specific	215.02	43.24	43.24	3.98	36	>sp|P01859|IGHG2_HUMAN Immunoglobulin heavy constant gamma 2 OS=Homo sapiens OX=9606 GN=IGHG2 PE=1 SV=2	2858	20210911_zy_plasma_ethcd_2.3675.3675.3	controllerType=0 controllerNumber=1 scan=3675	16.6083
01979:3	93	K.EN[+2204.772]LTAR.A	HexNAc(4)Hex(5)NeuAc(2)	N[+2205]	970.051	3	2908.14	2908.15	0	-2.3	579	Specific	215.28	37.28	37.28	0.38	2	>sp|Q06033|ITIH3_HUMAN Inter-alpha-trypsin inhibitor heavy chain H3 OS=Homo sapiens OX=9606 GN=ITIH3 PE=1 SV=2	4115	20210911_zy_plasma_ethcd_2.2180.2180.3	controllerType=0 controllerNumber=1 scan=2180	9.962
07959:4	7	K.ELHHLQEQN[+3007.058]VSNAFLDK.G	HexNAc(5)Hex(6)Fuc(1)NeuAc(3)	N[+3007]	1258.02	4	5029.05	5029.06	0	-3	754	Specific	215.42	170.01	170.01	4.58	24	>sp|P00450|CERU_HUMAN Ceruloplasmin OS=Homo sapiens OX=9606 GN=CP PE=1 SV=1	460	20210911_zy_plasma_ethcd_2.8728.8728.4	controllerType=0 controllerNumber=1 scan=8728	39.0572
12318:3	67	K.GVPQPN[+2569.905]ITWLKR.G	HexNAc(5)Hex(6)NeuAc(2)	N[+2570]	1326.91	3	3978.7	3978.71	0	-1.7	1325	Specific	215.52	17.76	17.76	0.47	7	>sp|P82987|ATL3_HUMAN ADAMTS-like protein 3 OS=Homo sapiens OX=9606 GN=ADAMTSL3 PE=1 SV=4	20246	20210911_zy_plasma_ethcd_2.13511.13511.4	controllerType=0 controllerNumber=1 scan=13511	60.7496
07001:4	1	K.NLFLN[+2861.000]HSEN[+2935.037]ATAK.D	HexNAc(5)Hex(6)NeuAc(3),HexNAc(6)Hex(7)NeuAc(2)	N[+2861][+2935]	1814.19	4	7253.76	7254.77	-1	-1.5	203	Specific	215.74	114.27	18.68	4.28	151	>sp|P00738|HPT_HUMAN Haptoglobin OS=Homo sapiens OX=9606 GN=HP PE=1 SV=1	3044	20210911_zy_plasma_ethcd_2.7679.7679.4	controllerType=0 controllerNumber=1 scan=7679	34.4061
13254:3	1	K.VVLHPN[+2715.963]YSQVDIGLIK.L	HexNAc(5)Hex(6)Fuc(1)NeuAc(2)	N[+2716]	1504.32	3	4510.96	4510.97	0	-3.6	236	Specific	215.77	108.15	108.15	4.45	151	>sp|P00738|HPT_HUMAN Haptoglobin OS=Homo sapiens OX=9606 GN=HP PE=1 SV=1	3044	20210911_zy_plasma_ethcd_2.14536.14536.3	controllerType=0 controllerNumber=1 scan=14536	65.2794
04524:3	15	R.VYKPSAGN[+2861.000]NSLYR.D	HexNAc(5)Hex(6)NeuAc(3)	N[+2861]	1443.92	3	4329.73	4329.75	0	-4.5	155	Specific	215.85	70.5	70.5	3.97	19	>sp|P02749|APOH_HUMAN Beta-2-glycoprotein 1 OS=Homo sapiens OX=9606 GN=APOH PE=1 SV=3	19971	20210911_zy_plasma_ethcd_2.4967.4967.3	controllerType=0 controllerNumber=1 scan=4967	22.361
09122:4	1	K.NLFLN[+2861.000]HSEN[+3007.058]ATAK.D	HexNAc(5)Hex(6)NeuAc(3),HexNAc(5)Hex(6)Fuc(1)NeuAc(3)	N[+2861][+3007]	1832.45	4	7326.78	7326.79	0	-1.3	203	Specific	215.98	77.12	0	4.12	151	>sp|P00738|HPT_HUMAN Haptoglobin OS=Homo sapiens OX=9606 GN=HP PE=1 SV=1	3044	20210911_zy_plasma_ethcd_2.10005.10005.4	controllerType=0 controllerNumber=1 scan=10005	44.8718
10064:3	24	K.YDFN[+1913.677]SSMLYSTAK.G	HexNAc(4)Hex(5)NeuAc(1)	N[+1914]	1147.45	3	3440.35	3440.36	0	-3	3462	Specific	216.03	92.42	92.42	4.34	10	>sp|P04114|APOB_HUMAN Apolipoprotein B-100 OS=Homo sapiens OX=9606 GN=APOB PE=1 SV=2	6234	20210911_zy_plasma_ethcd_2.11038.11038.3	controllerType=0 controllerNumber=1 scan=11038	49.5392
06930:5	1	K.NLFLN[+2935.037]HSEN[+2861.000]ATAK.D	HexNAc(6)Hex(7)NeuAc(2),HexNAc(5)Hex(6)NeuAc(3)	N[+2861][+2935]	1451.56	5	7253.78	7254.77	-1	1.2	203	Specific	216.09	107.68	0	3.57	151	>sp|P00738|HPT_HUMAN Haptoglobin OS=Homo sapiens OX=9606 GN=HP PE=1 SV=1	3044	20210911_zy_plasma_ethcd_2.7601.7601.5	controllerType=0 controllerNumber=1 scan=7601	34.054
03045:4	1	K.NLFLN[+2643.941]HSEN[+1548.545]ATAK.D	HexNAc(6)Hex(7)NeuAc(1),HexNAc(3)Hex(4)NeuAc(1)	N[+1549][+2644]	1413.31	4	5650.21	5651.22	-1	-1.2	203	Specific	216.56	216.56	1.92	4.32	151	>sp|P00738|HPT_HUMAN Haptoglobin OS=Homo sapiens OX=9606 GN=HP PE=1 SV=1	3044	20210911_zy_plasma_ethcd_2.3347.3347.4	controllerType=0 controllerNumber=1 scan=3347	15.1472
05497:4	1	K.NLFLN[+2921.058]HSEN[+2026.687]ATAK.D	HexNAc(8)Hex(8),HexNAc(2)Hex(10)	N[+2027][+2921]	1602.62	4	6407.46	6406.48	1	-3.1	203	Specific	216.9	86.23	1.05	4.2	151	>sp|P00738|HPT_HUMAN Haptoglobin OS=Homo sapiens OX=9606 GN=HP PE=1 SV=1	3044	20210911_zy_plasma_ethcd_2.6033.6033.4	controllerType=0 controllerNumber=1 scan=6033	27.1237
01089:3	19	R.HN[+2350.830]STGC[+57.021]LR.M	HexNAc(4)Hex(5)Fuc(1)NeuAc(2)	C[+57], N[+2351]	1099.09	3	3295.26	3295.27	0	-1.7	290	Specific	217.34	51.1	51.1	2.6	15	>sp|P10909|CLUS_HUMAN Clusterin OS=Homo sapiens OX=9606 GN=CLU PE=1 SV=1	6125	20210911_zy_plasma_ethcd_2.1206.1206.3	controllerType=0 controllerNumber=1 scan=1206	5.6866
07730:3	2	R.GLTFQQN[+2278.809]ASSM[+15.995]C[+57.021]VPDQDTAIR.V	HexNAc(5)Hex(6)NeuAc(1)	C[+57], M[+16], N[+2279]	1545.64	3	4634.9	4633.88	1	4.1	203	Specific	217.35	104.57	56.21	3.84	56	>sp|P01871|IGHM_HUMAN Immunoglobulin heavy constant mu OS=Homo sapiens OX=9606 GN=IGHM PE=1 SV=4	10127	20210911_zy_plasma_ethcd_2.8477.8477.4	controllerType=0 controllerNumber=1 scan=8477	37.9351
01646:3	8	R.EN[+2569.905]GTISR.Y	HexNAc(5)Hex(6)NeuAc(2)	N[+2570]	1116.1	3	3346.29	3346.29	0	-2.5	102	Specific	218.56	28.25	28.25	2.17	30	>sp|P02763|A1AG1_HUMAN Alpha-1-acid glycoprotein 1 OS=Homo sapiens OX=9606 GN=ORM1 PE=1 SV=1	2208	20210911_zy_plasma_ethcd_2.1816.1816.3	controllerType=0 controllerNumber=1 scan=1816	8.3958
08399:3	11	R.SWPAVGN[+2715.963]C[+57.021]SSALR.W	HexNAc(5)Hex(6)Fuc(1)NeuAc(2)	C[+57], N[+2716]	1374.21	3	4120.62	4120.63	0	-1.5	181	Specific	218.65	84.06	84.06	4.11	25	>sp|P02790|HEMO_HUMAN Hemopexin OS=Homo sapiens OX=9606 GN=HPX PE=1 SV=2	9336	20210911_zy_plasma_ethcd_2.9210.9210.3	controllerType=0 controllerNumber=1 scan=9210	41.2068
03396:3	39	R.DTFVN[+2204.772]ASR.T	HexNAc(4)Hex(5)NeuAc(2)	N[+2205]	1038.74	3	3114.21	3114.21	0	-2.7	234	Specific	219.12	49.11	49.11	2.71	8	>sp|P05155|IC1_HUMAN Plasma protease C1 inhibitor OS=Homo sapiens OX=9606 GN=SERPING1 PE=1 SV=2	9291	20210911_zy_plasma_ethcd_2.3732.3732.3	controllerType=0 controllerNumber=1 scan=3732	16.8655
07657:4	1	K.NLFLN[+2935.037]HSEN[+2188.740]ATAK.D	HexNAc(6)Hex(7)NeuAc(2),HexNAc(2)Hex(11)	N[+2189][+2935]	1646.13	4	6581.49	6582.51	-1	-2	203	Specific	219.37	123.32	4	4.55	151	>sp|P00738|HPT_HUMAN Haptoglobin OS=Homo sapiens OX=9606 GN=HP PE=1 SV=1	3044	20210911_zy_plasma_ethcd_2.8397.8397.4	controllerType=0 controllerNumber=1 scan=8397	37.5889
09749:4	1	K.NLFLN[+3517.228]HSEN[+2204.772]ATAK.D	HexNAc(6)Hex(7)NeuAc(4),HexNAc(4)Hex(5)NeuAc(2)	N[+2205][+3517]	1795.94	4	7180.73	7180.73	0	-0.7	203	Specific	219.4	103.69	8	3.93	151	>sp|P00738|HPT_HUMAN Haptoglobin OS=Homo sapiens OX=9606 GN=HP PE=1 SV=1	3044	20210911_zy_plasma_ethcd_2.10692.10692.4	controllerType=0 controllerNumber=1 scan=10692	47.9558
09925:3	30	R.ADGTVNQIEGEATPVN[+1913.677]LTEPAK.L	HexNAc(4)Hex(5)NeuAc(1)	N[+1914]	1389.94	3	4167.79	4167.8	0	-0.5	83	Specific	219.49	102.38	102.38	4.24	6	>sp|P05090|APOD_HUMAN Apolipoprotein D OS=Homo sapiens OX=9606 GN=APOD PE=1 SV=1	120	20210911_zy_plasma_ethcd_2.10885.10885.3	controllerType=0 controllerNumber=1 scan=10885	48.8329
12062:3	6	R.GTAGNALMDGASQLMGEN[+1913.677]R.T	HexNAc(4)Hex(5)NeuAc(1)	N[+1914]	1269.51	3	3806.52	3806.54	0	-3.3	377	Specific	219.57	103.91	47.76	4.46	33	>sp|P02675|FIBB_HUMAN Fibrinogen beta chain OS=Homo sapiens OX=9606 GN=FGB PE=1 SV=2	6006	20210911_zy_plasma_ethcd_2.13231.13231.3	controllerType=0 controllerNumber=1 scan=13231	59.4874
09585:3	15	K.LGN[+2861.000]WSAMPSC[+57.021]K.A	HexNAc(5)Hex(6)NeuAc(3)	C[+57], N[+2861]	1371.19	3	4111.56	4111.57	0	-2.6	251	Specific	219.73	86.03	86.03	4.1	19	>sp|P02749|APOH_HUMAN Beta-2-glycoprotein 1 OS=Homo sapiens OX=9606 GN=APOH PE=1 SV=3	19971	20210911_zy_plasma_ethcd_2.10512.10512.3	controllerType=0 controllerNumber=1 scan=10512	47.1381
04322:3	12	K.IPC[+57.021]SQPPQIEHGTIN[+2350.830]SSR.S	HexNAc(4)Hex(5)Fuc(1)NeuAc(2)	C[+57], N[+2351]	1457.94	3	4371.81	4371.82	0	-2.4	868	Specific	219.96	103.78	103.78	4.66	17	>sp|P08603|CFAH_HUMAN Complement factor H OS=Homo sapiens OX=9606 GN=CFH PE=1 SV=4	385	20210911_zy_plasma_ethcd_2.4746.4746.3	controllerType=0 controllerNumber=1 scan=4746	21.3805
00976:3	36	K.N[+3007.058]GTR.G	HexNAc(5)Hex(6)Fuc(1)NeuAc(3)	N[+3007]	1152.1	3	3454.28	3454.29	0	-2.2	186	Specific	220.28	29.67	29.67	2.75	8	>sp|P01011|AACT_HUMAN Alpha-1-antichymotrypsin OS=Homo sapiens OX=9606 GN=SERPINA3 PE=1 SV=2	8788	20210911_zy_plasma_ethcd_2.1082.1082.3	controllerType=0 controllerNumber=1 scan=1082	5.1235
12547:3	67	K.GVPQPN[+2569.905]ITWLKR.G	HexNAc(5)Hex(6)NeuAc(2)	N[+2570]	1326.9	3	3978.7	3978.71	0	-2.8	1325	Specific	220.28	14	14	2.16	7	>sp|P82987|ATL3_HUMAN ADAMTS-like protein 3 OS=Homo sapiens OX=9606 GN=ADAMTSL3 PE=1 SV=4	20246	20210911_zy_plasma_ethcd_2.13762.13762.4	controllerType=0 controllerNumber=1 scan=13762	61.854
12216:3	44	K.LQAPLN[+2204.772]YTEFQK.P	HexNAc(4)Hex(5)NeuAc(2)	N[+2205]	1219.51	3	3656.51	3656.53	0	-4	489	Specific	220.49	61.78	61.78	5.81	9	>sp|P03952|KLKB1_HUMAN Plasma kallikrein OS=Homo sapiens OX=9606 GN=KLKB1 PE=1 SV=1	11889	20210911_zy_plasma_ethcd_2.13400.13400.3	controllerType=0 controllerNumber=1 scan=13400	60.2509
07510:3	42	K.HAN[+2204.772]WTLTPLK.S	HexNAc(4)Hex(5)NeuAc(2)	N[+2205]	1129.14	3	3385.41	3385.42	0	-1.6	251	Specific	220.63	63.29	63.29	5.34	3	>sp|P27169|PON1_HUMAN Serum paraoxonase/arylesterase 1 OS=Homo sapiens OX=9606 GN=PON1 PE=1 SV=3	15463	20210911_zy_plasma_ethcd_2.8236.8236.3	controllerType=0 controllerNumber=1 scan=8236	36.8606
06792:3	2	K.STGKPTLYN[+1419.502]VSLVM[+15.995]SDTAGTC[+57.021]Y.-	HexNAc(3)Hex(5)	C[+57], M[+16], N[+1420]	1267.54	3	3800.6	3800.6	0	-1.8	432	CRagged	220.91	184.67	184.67	6.39	56	>sp|P01871|IGHM_HUMAN Immunoglobulin heavy constant mu OS=Homo sapiens OX=9606 GN=IGHM PE=1 SV=4	10127	20210911_zy_plasma_ethcd_2.7450.7450.3	controllerType=0 controllerNumber=1 scan=7450	33.3783
09927:3	28	K.N[+2204.772]LSM[+15.995]PLLPADFHK.E	HexNAc(4)Hex(5)NeuAc(2)	M[+16], N[+2205]	1235.18	3	3703.54	3703.54	0	-1.3	49	Specific	221.27	97.79	97.79	5.64	9	>sp|P05546|HEP2_HUMAN Heparin cofactor 2 OS=Homo sapiens OX=9606 GN=SERPIND1 PE=1 SV=3	4741	20210911_zy_plasma_ethcd_2.10887.10887.3	controllerType=0 controllerNumber=1 scan=10887	48.8421
00950:3	16	K.TKPREEQFN[+1095.397]STYR.V	HexNAc(3)Hex(3)	N[+1095]	917.739	3	2751.2	2751.21	0	-2.9	169	Specific	221.29	71.97	71.97	5.87	24	>sp|P01861|IGHG4_HUMAN Immunoglobulin heavy constant gamma 4 OS=Homo sapiens OX=9606 GN=IGHG4 PE=1 SV=1	12793	20210911_zy_plasma_ethcd_2.1053.1053.3	controllerType=0 controllerNumber=1 scan=1053	4.999
03592:3	73	K.EVFVHPN[+2204.772]YSK.S	HexNAc(4)Hex(5)NeuAc(2)	N[+2205]	1142.13	3	3424.37	3424.38	0	-2.5	284	Specific	221.36	64.63	64.63	3.66	1	>sp|P04070|PROC_HUMAN Vitamin K-dependent protein C OS=Homo sapiens OX=9606 GN=PROC PE=1 SV=1	2100	20210911_zy_plasma_ethcd_2.3947.3947.3	controllerType=0 controllerNumber=1 scan=3947	17.8421
02949:3	123	K.AQYEDIAN[+2204.772]R.S	HexNAc(4)Hex(5)NeuAc(2)	N[+2205]	1095.43	3	3284.28	3284.28	0	-2.7	265	Specific	221.48	11.18	11.18	1.61	1	>sp|P05787|K2C8_HUMAN Keratin, type II cytoskeletal 8 OS=Homo sapiens OX=9606 GN=KRT8 PE=1 SV=7	7965	20210911_zy_plasma_ethcd_2.3242.3242.3	controllerType=0 controllerNumber=1 scan=3242	14.6789
09595:3	15	K.LGN[+3007.058]WSAMPSC[+57.021]K.A	HexNAc(5)Hex(6)Fuc(1)NeuAc(3)	C[+57], N[+3007]	1419.87	3	4257.61	4257.62	0	-3.2	251	Specific	221.65	37.84	37.84	4.7	19	>sp|P02749|APOH_HUMAN Beta-2-glycoprotein 1 OS=Homo sapiens OX=9606 GN=APOH PE=1 SV=3	19971	20210911_zy_plasma_ethcd_2.10523.10523.3	controllerType=0 controllerNumber=1 scan=10523	47.1894
09309:4	1	K.NLFLN[+3007.058]HSEN[+2861.000]ATAK.D	HexNAc(5)Hex(6)Fuc(1)NeuAc(3),HexNAc(5)Hex(6)NeuAc(3)	N[+2861][+3007]	1832.45	4	7326.78	7326.79	0	-1	203	Specific	221.66	108.37	0	5.27	151	>sp|P00738|HPT_HUMAN Haptoglobin OS=Homo sapiens OX=9606 GN=HP PE=1 SV=1	3044	20210911_zy_plasma_ethcd_2.10210.10210.4	controllerType=0 controllerNumber=1 scan=10210	45.7966
09677:4	1	K.NLFLN[+3866.365]HSEN[+2026.687]ATAK.D	HexNAc(7)Hex(7)Fuc(1)NeuAc(4),HexNAc(2)Hex(10)	N[+2027][+3866]	1838.95	4	7352.77	7351.79	1	-2.2	203	Specific	221.75	106.94	0	5.88	151	>sp|P00738|HPT_HUMAN Haptoglobin OS=Homo sapiens OX=9606 GN=HP PE=1 SV=1	3044	20210911_zy_plasma_ethcd_2.10613.10613.4	controllerType=0 controllerNumber=1 scan=10613	47.6012
07804:3	7	K.ELHHLQEQN[+3007.058]VSNAFLDK.G	HexNAc(5)Hex(6)Fuc(1)NeuAc(3)	N[+3007]	1676.69	3	5028.04	5029.06	-1	-3.3	754	Specific	221.92	86.04	86.04	6.52	24	>sp|P00450|CERU_HUMAN Ceruloplasmin OS=Homo sapiens OX=9606 GN=CP PE=1 SV=1	460	20210911_zy_plasma_ethcd_2.8558.8558.3	controllerType=0 controllerNumber=1 scan=8558	38.2959
02306:2	5	K.TPLTAN[+1768.640]ITK.S	HexNAc(4)Hex(5)Fuc(1)	N[+1769]	1364.1	2	2727.19	2727.2	0	-1.4	200	Specific	222.02	115.08	115.08	5.33	33	>sp|P01877|IGHA2_HUMAN Immunoglobulin heavy constant alpha 2 OS=Homo sapiens OX=9606 GN=IGHA2 PE=1 SV=4	10403	20210911_zy_plasma_ethcd_2.2538.2538.2	controllerType=0 controllerNumber=1 scan=2538	11.5456
13972:3	13	R.QQQHLFGSN[+2204.772]VTDC[+57.021]SGNFC[+57.021]LFR.S	HexNAc(4)Hex(5)NeuAc(2)	C[+57]*2, N[+2205]	1573.63	3	4718.89	4719.9	-1	-1.5	622	Specific	222.22	139.02	139.02	6.67	17	>sp|TRFE_HUMAN|(Common contaminant protein)	20484	20210911_zy_plasma_ethcd_2.15323.15323.3	controllerType=0 controllerNumber=1 scan=15323	68.7504
07414:3	6	R.GTAGNALMDGASQLM[+15.995]GEN[+1913.677]R.T	HexNAc(4)Hex(5)NeuAc(1)	M[+16], N[+1914]	1274.84	3	3822.51	3822.53	0	-4.4	377	Specific	222.47	108.64	108.64	5.61	33	>sp|P02675|FIBB_HUMAN Fibrinogen beta chain OS=Homo sapiens OX=9606 GN=FGB PE=1 SV=2	6006	20210911_zy_plasma_ethcd_2.8130.8130.3	controllerType=0 controllerNumber=1 scan=8130	36.3945
07072:3	26	K.PEIN[+2204.772]STTHPGADLQENFC[+57.021]R.N	HexNAc(4)Hex(5)NeuAc(2)	C[+57], N[+2205]	1464.26	3	4390.77	4390.77	0	0.2	140	Specific	222.88	127.34	127.34	5.16	9	>sp|P00734|THRB_HUMAN Prothrombin OS=Homo sapiens OX=9606 GN=F2 PE=1 SV=2	18404	20210911_zy_plasma_ethcd_2.7756.7756.3	controllerType=0 controllerNumber=1 scan=7756	34.7522
06732:3	2	K.STGKPTLYN[+1419.502]VSLVM[+15.995]SDTAGTC[+57.021]Y.-	HexNAc(3)Hex(5)	C[+57], M[+16], N[+1420]	1267.54	3	3800.59	3800.6	0	-2.4	432	CRagged	223.04	164.25	164.25	6.38	56	>sp|P01871|IGHM_HUMAN Immunoglobulin heavy constant mu OS=Homo sapiens OX=9606 GN=IGHM PE=1 SV=4	10127	20210911_zy_plasma_ethcd_2.7384.7384.3	controllerType=0 controllerNumber=1 scan=7384	33.0768
02379:2	5	K.TPLTAN[+1606.587]ITK.S	HexNAc(4)Hex(4)Fuc(1)	N[+1607]	1283.07	2	2565.14	2565.14	0	-0.5	200	Specific	223.07	91.16	91.16	4.77	33	>sp|P01877|IGHA2_HUMAN Immunoglobulin heavy constant alpha 2 OS=Homo sapiens OX=9606 GN=IGHA2 PE=1 SV=4	10403	20210911_zy_plasma_ethcd_2.2618.2618.2	controllerType=0 controllerNumber=1 scan=2618	11.9016
08844:3	11	R.SWPAVGN[+2350.830]C[+57.021]SSALR.W	HexNAc(4)Hex(5)Fuc(1)NeuAc(2)	C[+57], N[+2351]	1252.5	3	3755.5	3755.5	0	-0.7	181	Specific	223.22	60.21	60.21	5.05	25	>sp|P02790|HEMO_HUMAN Hemopexin OS=Homo sapiens OX=9606 GN=HPX PE=1 SV=2	9336	20210911_zy_plasma_ethcd_2.9699.9699.3	controllerType=0 controllerNumber=1 scan=9699	43.4363
01320:3	2	K.YKN[+2424.867]NSDISSTR.G	HexNAc(5)Hex(6)Fuc(1)NeuAc(1)	N[+2425]	1237.16	3	3709.48	3709.49	0	-2	44	Specific	224.05	68.02	68.02	5.56	56	>sp|P01871|IGHM_HUMAN Immunoglobulin heavy constant mu OS=Homo sapiens OX=9606 GN=IGHM PE=1 SV=4	10127	20210911_zy_plasma_ethcd_2.1459.1459.3	controllerType=0 controllerNumber=1 scan=1459	6.8339
10304:3	20	R.IIVPLNNREN[+2059.735]ISDPTSPLR.T	HexNAc(4)Hex(5)Fuc(1)NeuAc(1)	N[+2060]	1403.31	3	4207.91	4207.91	0	-0.9	62	Specific	224.12	149.89	149.89	5.66	13	>sp|P01591|IGJ_HUMAN Immunoglobulin J chain OS=Homo sapiens OX=9606 GN=JCHAIN PE=1 SV=4	4401	20210911_zy_plasma_ethcd_2.11301.11301.3	controllerType=0 controllerNumber=1 scan=11301	50.7285
12515:3	2	R.GLTFQQN[+2553.910]ASSMC[+57.021]VPDQDTAIR.V	HexNAc(5)Hex(5)Fuc(1)NeuAc(2)	C[+57], N[+2554]	1631.33	3	4891.98	4892.99	-1	-0.9	203	Specific	224.13	118.17	118.17	6.26	56	>sp|P01871|IGHM_HUMAN Immunoglobulin heavy constant mu OS=Homo sapiens OX=9606 GN=IGHM PE=1 SV=4	10127	20210911_zy_plasma_ethcd_2.13727.13727.3	controllerType=0 controllerNumber=1 scan=13727	61.6973
04346:3	12	K.IPC[+57.021]SQPPQIEHGTIN[+2350.830]SSR.S	HexNAc(4)Hex(5)Fuc(1)NeuAc(2)	C[+57], N[+2351]	1458.27	3	4372.81	4371.82	1	-3.4	868	Specific	224.5	112.25	39.14	6.1	17	>sp|P08603|CFAH_HUMAN Complement factor H OS=Homo sapiens OX=9606 GN=CFH PE=1 SV=4	385	20210911_zy_plasma_ethcd_2.4772.4772.3	controllerType=0 controllerNumber=1 scan=4772	21.4945
09820:3	14	R.QNQC[+57.021]FYN[+2715.963]SSYLNVQR.E	HexNAc(5)Hex(6)Fuc(1)NeuAc(2)	C[+57], N[+2716]	1546.28	3	4636.83	4636.83	0	-0.6	87	Specific	224.53	106.5	106.5	5.52	18	>sp|P19652|A1AG2_HUMAN Alpha-1-acid glycoprotein 2 OS=Homo sapiens OX=9606 GN=ORM2 PE=1 SV=2	4531	20210911_zy_plasma_ethcd_2.10769.10769.3	controllerType=0 controllerNumber=1 scan=10769	48.2981
05664:4	1	K.NLFLN[+2861.000]HSEN[+1913.677]ATAK.D	HexNAc(5)Hex(6)NeuAc(3),HexNAc(4)Hex(5)NeuAc(1)	N[+1914][+2861]	1559.11	4	6233.41	6233.41	0	-0.1	203	Specific	224.69	224.69	0	5.05	151	>sp|P00738|HPT_HUMAN Haptoglobin OS=Homo sapiens OX=9606 GN=HP PE=1 SV=1	3044	20210911_zy_plasma_ethcd_2.6216.6216.4	controllerType=0 controllerNumber=1 scan=6216	27.9393
04353:3	6	R.GTAGNALMDGASQLM[+15.995]GEN[+1954.704]R.T	HexNAc(5)Hex(4)NeuAc(1)	M[+16], N[+1955]	1288.52	3	3863.55	3863.56	0	-1.5	377	Specific	225.33	73.14	73.14	5.82	33	>sp|P02675|FIBB_HUMAN Fibrinogen beta chain OS=Homo sapiens OX=9606 GN=FGB PE=1 SV=2	6006	20210911_zy_plasma_ethcd_2.4780.4780.3	controllerType=0 controllerNumber=1 scan=4780	21.5297
09729:4	14	R.QNQC[+57.021]FYN[+2935.037]SSYLNVQR.E	HexNAc(6)Hex(7)NeuAc(2)	C[+57], N[+2935]	1214.47	4	4854.88	4855.9	-1	-4.9	87	Specific	225.38	116.62	116.62	5.94	18	>sp|P19652|A1AG2_HUMAN Alpha-1-acid glycoprotein 2 OS=Homo sapiens OX=9606 GN=ORM2 PE=1 SV=2	4531	20210911_zy_plasma_ethcd_2.10670.10670.4	controllerType=0 controllerNumber=1 scan=10670	47.8603
02264:3	53	R.N[+2262.814]YTLTGR.D	HexNAc(5)Hex(5)Fuc(1)NeuAc(1)	N[+2263]	1029.75	3	3087.23	3087.24	0	-2.1	754	Specific	225.55	54.11	54.11	4.58	5	>sp|P10643|CO7_HUMAN Complement component C7 OS=Homo sapiens OX=9606 GN=C7 PE=1 SV=2	4350	20210911_zy_plasma_ethcd_2.2492.2492.3	controllerType=0 controllerNumber=1 scan=2492	11.3358
04434:3	12	K.IPC[+57.021]SQPPQIEHGTIN[+2204.772]SSR.S	HexNAc(4)Hex(5)NeuAc(2)	C[+57], N[+2205]	1409.26	3	4225.75	4225.76	0	-1.8	868	Specific	225.56	140.51	140.51	6.01	17	>sp|P08603|CFAH_HUMAN Complement factor H OS=Homo sapiens OX=9606 GN=CFH PE=1 SV=4	385	20210911_zy_plasma_ethcd_2.4868.4868.2	controllerType=0 controllerNumber=1 scan=4868	21.9207
03664:3	60	R.AFGSNPN[+2204.772]LTK.V	HexNAc(4)Hex(5)NeuAc(2)	N[+2205]	1085.11	3	3253.31	3253.31	0	-2.8	68	Specific	225.57	58.3	58.3	4.06	3	>sp|P22792|CPN2_HUMAN Carboxypeptidase N subunit 2 OS=Homo sapiens OX=9606 GN=CPN2 PE=1 SV=3	2992	20210911_zy_plasma_ethcd_2.4026.4026.3	controllerType=0 controllerNumber=1 scan=4026	18.1946
04138:4	1	K.NLFLN[+1913.677]HSEN[+2350.793]ATAK.D	HexNAc(4)Hex(5)NeuAc(1),HexNAc(2)Hex(12)	N[+1914][+2351]	1431.56	4	5723.23	5723.2	0	4.2	203	Specific	225.62	225.62	0.47	4.54	151	>sp|P00738|HPT_HUMAN Haptoglobin OS=Homo sapiens OX=9606 GN=HP PE=1 SV=1	3044	20210911_zy_plasma_ethcd_2.4545.4545.4	controllerType=0 controllerNumber=1 scan=4545	20.4972
01062:3	2	K.N[+2075.730]NSDISSTR.G	HexNAc(4)Hex(6)NeuAc(1)	N[+2076]	1023.73	3	3069.18	3069.19	0	-3	46	Specific	225.91	72.93	72.93	5.4	56	>sp|P01871|IGHM_HUMAN Immunoglobulin heavy constant mu OS=Homo sapiens OX=9606 GN=IGHM PE=1 SV=4	10127	20210911_zy_plasma_ethcd_2.1176.1176.3	controllerType=0 controllerNumber=1 scan=1176	5.5519
03696:3	74	K.AAIPSALDTN[+2059.735]SSK.S	HexNAc(4)Hex(5)Fuc(1)NeuAc(1)	N[+2060]	1112.13	3	3334.38	3334.39	0	-3.5	542	Specific	226.52	79.09	79.09	3.74	2	>sp|Q08380|LG3BP_HUMAN Galectin-3-binding protein OS=Homo sapiens OX=9606 GN=LGALS3BP PE=1 SV=1	4876	20210911_zy_plasma_ethcd_2.4061.4061.3	controllerType=0 controllerNumber=1 scan=4061	18.3504
03099:3	15	K.LGN[+1913.677]WSAM[+15.995]PSC[+57.021]K.A	HexNAc(4)Hex(5)NeuAc(1)	C[+57], M[+16], N[+1914]	1060.75	3	3180.23	3180.24	0	-3.5	251	Specific	226.8	86.17	86.17	5.39	19	>sp|P02749|APOH_HUMAN Beta-2-glycoprotein 1 OS=Homo sapiens OX=9606 GN=APOH PE=1 SV=3	19971	20210911_zy_plasma_ethcd_2.3406.3406.3	controllerType=0 controllerNumber=1 scan=3406	15.4084
02671:3	34	R.HEEGHMLN[+1913.677]C[+57.021]TC[+57.021]FGQGR.G	HexNAc(4)Hex(5)NeuAc(1)	C[+57]*2, N[+1914]	1282.83	3	3846.46	3846.47	0	-1.2	535	Specific	226.84	80.08	80.08	5.77	3	>sp|P02751|FINC_HUMAN Fibronectin OS=Homo sapiens OX=9606 GN=FN1 PE=1 SV=4	5465	20210911_zy_plasma_ethcd_2.2937.2937.3	controllerType=0 controllerNumber=1 scan=2937	13.3234
03936:4	1	K.NLFLN[+3226.132]HSEN[+1622.582]ATAK.D	HexNAc(6)Hex(7)NeuAc(3),HexNAc(4)Hex(5)	N[+1623][+3226]	1577.62	4	6307.44	6307.45	0	-1.1	203	Specific	226.86	226.86	11.06	5.3	151	>sp|P00738|HPT_HUMAN Haptoglobin OS=Homo sapiens OX=9606 GN=HP PE=1 SV=1	3044	20210911_zy_plasma_ethcd_2.4324.4324.4	controllerType=0 controllerNumber=1 scan=4324	19.5274
00917:3	3	K.TKPREEQYN[+1768.640]STYR.V	HexNAc(4)Hex(5)Fuc(1)	N[+1769]	1147.48	3	3440.44	3440.45	0	-2.8	291	Specific	226.91	40.76	40.76	5.19	53	>sp|P0DOX5|IGG1_HUMAN Immunoglobulin gamma-1 heavy chain OS=Homo sapiens OX=9606 PE=1 SV=2	10252	20210911_zy_plasma_ethcd_2.1017.1017.3	controllerType=0 controllerNumber=1 scan=1017	4.8324
00785:3	50	K.HN[+1913.677]FSHC[+57.021]C[+57.021]SK.V	HexNAc(4)Hex(5)NeuAc(1)	C[+57]*2, N[+1914]	1030.72	3	3090.14	3090.14	0	-2.6	108	Specific	226.98	74.08	74.08	5.83	2	>sp|P43652|AFAM_HUMAN Afamin OS=Homo sapiens OX=9606 GN=AFM PE=1 SV=1	20367	20210911_zy_plasma_ethcd_2.872.872.3	controllerType=0 controllerNumber=1 scan=872	4.1621
02421:3	5	K.TPLTAN[+1809.666]ITK.S	HexNAc(5)Hex(4)Fuc(1)	N[+1810]	923.41	3	2768.22	2768.22	0	-2.3	200	Specific	227.19	84.65	84.65	5.56	33	>sp|P01877|IGHA2_HUMAN Immunoglobulin heavy constant alpha 2 OS=Homo sapiens OX=9606 GN=IGHA2 PE=1 SV=4	10403	20210911_zy_plasma_ethcd_2.2664.2664.3	controllerType=0 controllerNumber=1 scan=2664	12.1083
03861:4	6	K.YRGTAGNALMDGASQLM[+15.995]GEN[+1954.704]R.T	HexNAc(5)Hex(4)NeuAc(1)	M[+16], N[+1955]	1046.43	4	4182.71	4182.72	0	-1.8	375	Specific	227.67	182.26	70.39	5.95	33	>sp|P02675|FIBB_HUMAN Fibrinogen beta chain OS=Homo sapiens OX=9606 GN=FGB PE=1 SV=2	6006	20210911_zy_plasma_ethcd_2.4242.4242.4	controllerType=0 controllerNumber=1 scan=4242	19.1598
03766:3	49	K.C[+57.021]GN[+2204.772]C[+57.021]SLTTLK.D	HexNAc(4)Hex(5)NeuAc(2)	C[+57]*2, N[+2205]	1120.1	3	3358.3	3358.31	0	-2.3	172	Specific	228.28	83.09	83.09	5.56	2	>sp|P49908|SEPP1_HUMAN Selenoprotein P OS=Homo sapiens OX=9606 GN=SELENOP PE=1 SV=3	16703	20210911_zy_plasma_ethcd_2.4138.4138.3	controllerType=0 controllerNumber=1 scan=4138	18.6968
11441:3	1	K.VVLHPN[+2059.735]YSQVDIGLIK.L	HexNAc(4)Hex(5)Fuc(1)NeuAc(1)	N[+2060]	1285.58	3	3854.74	3854.75	0	-1.9	236	Specific	228.36	86.23	86.23	6.19	151	>sp|P00738|HPT_HUMAN Haptoglobin OS=Homo sapiens OX=9606 GN=HP PE=1 SV=1	3044	20210911_zy_plasma_ethcd_2.12548.12548.3	controllerType=0 controllerNumber=1 scan=12548	56.3513
03387:3	38	K.MFSQN[+3007.058]DTR.C	HexNAc(5)Hex(6)Fuc(1)NeuAc(3)	N[+3007]	1335.83	3	4005.49	4005.49	0	-1.2	321	Specific	228.37	35.72	35.72	3.99	5	>sp|P02750|A2GL_HUMAN Leucine-rich alpha-2-glycoprotein OS=Homo sapiens OX=9606 GN=LRG1 PE=1 SV=2	1095	20210911_zy_plasma_ethcd_2.3722.3722.3	controllerType=0 controllerNumber=1 scan=3722	16.8204
00755:3	105	R.AN[+2204.772]ISHK.D	HexNAc(4)Hex(5)NeuAc(2)	N[+2205]	958.715	3	2874.13	2874.14	0	-3	740	Specific	228.4	39.39	39.39	1.91	4	>sp|P01031|CO5_HUMAN Complement C5 OS=Homo sapiens OX=9606 GN=C5 PE=1 SV=4	20414	20210911_zy_plasma_ethcd_2.839.839.3	controllerType=0 controllerNumber=1 scan=839	4.0095
04105:3	1	K.NLFLN[+2861.000]HSEN[+1257.449]ATAK.D	HexNAc(5)Hex(6)NeuAc(3),HexNAc(3)Hex(4)	N[+1257][+2861]	1859.4	3	5576.17	5577.18	-1	-1.4	203	Specific	228.61	83.18	2.54	5.87	151	>sp|P00738|HPT_HUMAN Haptoglobin OS=Homo sapiens OX=9606 GN=HP PE=1 SV=1	3044	20210911_zy_plasma_ethcd_2.4508.4508.3	controllerType=0 controllerNumber=1 scan=4508	20.3369
01190:3	3	K.PREEQYN[+1768.640]STYR.V	HexNAc(4)Hex(5)Fuc(1)	N[+1769]	1071.1	3	3211.3	3211.31	0	-1.9	293	Specific	229.04	42.26	42.26	5.33	53	>sp|P0DOX5|IGG1_HUMAN Immunoglobulin gamma-1 heavy chain OS=Homo sapiens OX=9606 PE=1 SV=2	10252	20210911_zy_plasma_ethcd_2.1316.1316.3	controllerType=0 controllerNumber=1 scan=1316	6.1882
12177:3	17	K.LNAENN[+2861.000]ATFYFK.I	HexNAc(5)Hex(6)NeuAc(3)	N[+2861]	1431.57	3	4292.68	4292.69	0	-1.8	289	Specific	229.28	76.29	76.29	5.89	18	>sp|P01042|KNG1_HUMAN Kininogen-1 OS=Homo sapiens OX=9606 GN=KNG1 PE=1 SV=2	6533	20210911_zy_plasma_ethcd_2.13357.13357.3	controllerType=0 controllerNumber=1 scan=13357	60.0554
13137:3	13	R.QQQHLFGSN[+1913.677]VTDC[+57.021]SGNFC[+57.021]LFR.S	HexNAc(4)Hex(5)NeuAc(1)	C[+57]*2, N[+1914]	1476.94	3	4428.81	4428.8	0	1	622	Specific	229.42	126.26	126.26	5.49	17	>sp|TRFE_HUMAN|(Common contaminant protein)	20484	20210911_zy_plasma_ethcd_2.14408.14408.3	controllerType=0 controllerNumber=1 scan=14408	64.721
03539:3	4	R.EEQFN[+1897.682]STFR.V	HexNAc(4)Hex(4)Fuc(1)NeuAc(1)	N[+1898]	1019.07	3	3055.2	3055.2	0	-2.1	172	Specific	229.44	91.98	91.98	5.56	36	>sp|P01859|IGHG2_HUMAN Immunoglobulin heavy constant gamma 2 OS=Homo sapiens OX=9606 GN=IGHG2 PE=1 SV=2	2858	20210911_zy_plasma_ethcd_2.3889.3889.3	controllerType=0 controllerNumber=1 scan=3889	17.5826
09306:3	10	K.TVLTPATNHMGN[+1378.476]VTFTIPANR.E	HexNAc(2)Hex(6)	N[+1378]	1211.88	3	3633.63	3633.64	0	-1.9	74	Specific	229.47	187.25	77.34	6.4	17	>sp|P01024|CO3_HUMAN Complement C3 OS=Homo sapiens OX=9606 GN=C3 PE=1 SV=2	731	20210911_zy_plasma_ethcd_2.10206.10206.3	controllerType=0 controllerNumber=1 scan=10206	45.7821
09310:5	1	K.NLFLN[+3517.228]HSEN[+2204.772]ATAK.D	HexNAc(6)Hex(7)NeuAc(4),HexNAc(4)Hex(5)NeuAc(2)	N[+2205][+3517]	1436.95	5	7180.72	7180.73	0	-1.7	203	Specific	229.56	116.18	5.87	5.73	151	>sp|P00738|HPT_HUMAN Haptoglobin OS=Homo sapiens OX=9606 GN=HP PE=1 SV=1	3044	20210911_zy_plasma_ethcd_2.10211.10211.5	controllerType=0 controllerNumber=1 scan=10211	45.8013
10682:2	21	K.N[+2204.772]GSLFAFR.G	HexNAc(4)Hex(5)NeuAc(2)	N[+2205]	1558.62	2	3116.24	3116.25	0	-1.8	169	Specific	229.69	88.25	88.25	4.82	10	>sp|P04004|VTNC_HUMAN Vitronectin OS=Homo sapiens OX=9606 GN=VTN PE=1 SV=1	17960	20210911_zy_plasma_ethcd_2.11715.11715.2	controllerType=0 controllerNumber=1 scan=11715	52.5835
00989:3	36	K.N[+2861.000]GTR.G	HexNAc(5)Hex(6)NeuAc(3)	N[+2861]	1103.41	3	3308.22	3308.23	0	-2.2	186	Specific	229.7	32.1	32.1	2.75	8	>sp|P01011|AACT_HUMAN Alpha-1-antichymotrypsin OS=Homo sapiens OX=9606 GN=SERPINA3 PE=1 SV=2	8788	20210911_zy_plasma_ethcd_2.1096.1096.3	controllerType=0 controllerNumber=1 scan=1096	5.1826
05252:4	2	R.GLTFQQN[+2157.783]ASSMC[+57.021]VPDQDTAIR.V	HexNAc(6)Hex(4)NeuAc(1)	C[+57], N[+2158]	1124.97	4	4496.85	4496.86	0	-1.6	203	Specific	230.49	142.09	21.86	6.16	56	>sp|P01871|IGHM_HUMAN Immunoglobulin heavy constant mu OS=Homo sapiens OX=9606 GN=IGHM PE=1 SV=4	10127	20210911_zy_plasma_ethcd_2.5765.5765.4	controllerType=0 controllerNumber=1 scan=5765	25.9338
05653:4	1	K.NLFLN[+2204.772]HSEN[+2350.830]ATAK.D	HexNAc(4)Hex(5)NeuAc(2),HexNAc(4)Hex(5)Fuc(1)NeuAc(2)	N[+2205][+2351]	1504.34	4	6014.33	6014.34	0	-0.5	203	Specific	230.96	122.44	2.81	5.05	151	>sp|P00738|HPT_HUMAN Haptoglobin OS=Homo sapiens OX=9606 GN=HP PE=1 SV=1	3044	20210911_zy_plasma_ethcd_2.6204.6204.4	controllerType=0 controllerNumber=1 scan=6204	27.8882
10127:4	6	K.YRGTAGNALMDGASQLMGEN[+1913.677]R.T	HexNAc(4)Hex(5)NeuAc(1)	N[+1914]	1032.18	4	4125.69	4125.7	0	-1.4	375	Specific	231.17	198.02	77.72	6.39	33	>sp|P02675|FIBB_HUMAN Fibrinogen beta chain OS=Homo sapiens OX=9606 GN=FGB PE=1 SV=2	6006	20210911_zy_plasma_ethcd_2.11107.11107.4	controllerType=0 controllerNumber=1 scan=11107	49.8543
01427:2	3	R.EEQYN[+1606.587]STYR.V	HexNAc(4)Hex(4)Fuc(1)	N[+1607]	1398.55	2	2796.09	2796.1	0	-1.6	295	Specific	232.11	103.86	103.86	5.33	53	>sp|P0DOX5|IGG1_HUMAN Immunoglobulin gamma-1 heavy chain OS=Homo sapiens OX=9606 PE=1 SV=2	10252	20210911_zy_plasma_ethcd_2.1577.1577.2	controllerType=0 controllerNumber=1 scan=1577	7.3649
11699:3	1	K.VVLHPN[+1913.677]YSQVDIGLIK.L	HexNAc(4)Hex(5)NeuAc(1)	N[+1914]	1236.9	3	3708.68	3708.69	0	-3.2	236	Specific	232.31	60.95	60.95	5.81	151	>sp|P00738|HPT_HUMAN Haptoglobin OS=Homo sapiens OX=9606 GN=HP PE=1 SV=1	3044	20210911_zy_plasma_ethcd_2.12832.12832.3	controllerType=0 controllerNumber=1 scan=12832	57.6522
13366:3	21	K.N[+2861.000]GSLFAFR.G	HexNAc(5)Hex(6)NeuAc(3)	N[+2861]	1258.16	3	3772.46	3772.47	0	-2.8	169	Specific	232.37	67.91	67.91	4.8	10	>sp|P04004|VTNC_HUMAN Vitronectin OS=Homo sapiens OX=9606 GN=VTN PE=1 SV=1	17960	20210911_zy_plasma_ethcd_2.14660.14660.3	controllerType=0 controllerNumber=1 scan=14660	65.8151
02348:3	14	R.EN[+3517.228]GTVSR.Y	HexNAc(6)Hex(7)NeuAc(4)	N[+3517]	1427.21	3	4279.6	4279.6	0	0.1	102	Specific	232.43	54.52	54.52	3.57	18	>sp|P19652|A1AG2_HUMAN Alpha-1-acid glycoprotein 2 OS=Homo sapiens OX=9606 GN=ORM2 PE=1 SV=2	4531	20210911_zy_plasma_ethcd_2.2584.2584.3	controllerType=0 controllerNumber=1 scan=2584	11.7542
03285:3	57	R.TLLN[+2407.852]ASR.S	HexNAc(5)Hex(5)NeuAc(2)	N[+2408]	1061.43	3	3182.29	3182.3	0	-2.8	493	Specific	232.69	48.86	48.86	4.59	5	>sp|P0DOX3|IGD_HUMAN Immunoglobulin delta heavy chain OS=Homo sapiens OX=9606 PE=1 SV=1	3827	20210911_zy_plasma_ethcd_2.3610.3610.3	controllerType=0 controllerNumber=1 scan=3610	16.3189
00908:3	3	K.TKPREEQYN[+1444.534]STYR.V	HexNAc(4)Hex(3)Fuc(1)	N[+1445]	1039.45	3	3116.33	3116.34	0	-2.5	291	Specific	232.72	56.52	56.52	5.41	53	>sp|P0DOX5|IGG1_HUMAN Immunoglobulin gamma-1 heavy chain OS=Homo sapiens OX=9606 PE=1 SV=2	10252	20210911_zy_plasma_ethcd_2.1007.1007.3	controllerType=0 controllerNumber=1 scan=1007	4.7879
01878:3	3	R.EEQYN[+2262.814]STYR.V	HexNAc(5)Hex(5)Fuc(1)NeuAc(1)	N[+2263]	1151.44	3	3452.32	3452.33	0	-2.8	295	Specific	232.79	48.25	48.25	5.36	53	>sp|P0DOX5|IGG1_HUMAN Immunoglobulin gamma-1 heavy chain OS=Homo sapiens OX=9606 PE=1 SV=2	10252	20210911_zy_plasma_ethcd_2.2069.2069.3	controllerType=0 controllerNumber=1 scan=2069	9.4889
12475:4	2	R.GLTFQQN[+2350.830]ASSMC[+57.021]VPDQDTAIR.V	HexNAc(4)Hex(5)Fuc(1)NeuAc(2)	C[+57], N[+2351]	1173.23	4	4689.88	4689.91	0	-5.8	203	Specific	233.03	160.55	38.47	6.54	56	>sp|P01871|IGHM_HUMAN Immunoglobulin heavy constant mu OS=Homo sapiens OX=9606 GN=IGHM PE=1 SV=4	10127	20210911_zy_plasma_ethcd_2.13683.13683.4	controllerType=0 controllerNumber=1 scan=13683	61.5042
06949:4	1	K.NLFLN[+3007.058]HSEN[+2715.963]ATAK.D	HexNAc(5)Hex(6)Fuc(1)NeuAc(3),HexNAc(5)Hex(6)Fuc(1)NeuAc(2)	N[+2716][+3007]	1796.19	4	7181.76	7181.75	0	0.4	203	Specific	233.48	103.73	0	4.76	151	>sp|P00738|HPT_HUMAN Haptoglobin OS=Homo sapiens OX=9606 GN=HP PE=1 SV=1	3044	20210911_zy_plasma_ethcd_2.7622.7622.4	controllerType=0 controllerNumber=1 scan=7622	34.1436
03694:3	74	K.AAIPSALDTN[+2059.735]SSK.S	HexNAc(4)Hex(5)Fuc(1)NeuAc(1)	N[+2060]	1112.13	3	3334.39	3334.39	0	-1.4	542	Specific	233.53	101.54	101.54	3.6	2	>sp|Q08380|LG3BP_HUMAN Galectin-3-binding protein OS=Homo sapiens OX=9606 GN=LGALS3BP PE=1 SV=1	4876	20210911_zy_plasma_ethcd_2.4058.4058.3	controllerType=0 controllerNumber=1 scan=4058	18.3392
07997:4	7	K.ELHHLQEQN[+3007.058]VSNAFLDK.G	HexNAc(5)Hex(6)Fuc(1)NeuAc(3)	N[+3007]	1257.77	4	5028.06	5029.06	-1	0.8	754	Specific	233.56	189.97	189.97	5.38	24	>sp|P00450|CERU_HUMAN Ceruloplasmin OS=Homo sapiens OX=9606 GN=CP PE=1 SV=1	460	20210911_zy_plasma_ethcd_2.8769.8769.4	controllerType=0 controllerNumber=1 scan=8769	39.2425
02896:3	12	R.ISEEN[+2204.772]ETTC[+57.021]YM[+15.995]GK.W	HexNAc(4)Hex(5)NeuAc(2)	C[+57], M[+16], N[+2205]	1261.48	3	3782.41	3782.42	0	-1.6	907	Specific	233.99	89.09	89.09	5.58	17	>sp|P08603|CFAH_HUMAN Complement factor H OS=Homo sapiens OX=9606 GN=CFH PE=1 SV=4	385	20210911_zy_plasma_ethcd_2.3184.3184.3	controllerType=0 controllerNumber=1 scan=3184	14.4217
01914:2	16	R.EEQFN[+1241.454]STYR.V	HexNAc(3)Hex(3)Fuc(1)	N[+1241]	1207.99	2	2414.97	2414.97	0	-2.6	173	Specific	234.11	73.34	73.34	5.24	24	>sp|P01861|IGHG4_HUMAN Immunoglobulin heavy constant gamma 4 OS=Homo sapiens OX=9606 GN=IGHG4 PE=1 SV=1	12793	20210911_zy_plasma_ethcd_2.2109.2109.2	controllerType=0 controllerNumber=1 scan=2109	9.6576
03459:3	38	K.MFSQN[+2861.000]DTR.C	HexNAc(5)Hex(6)NeuAc(3)	N[+2861]	1287.15	3	3859.43	3859.44	0	-2.2	321	Specific	234.38	63.37	63.37	4.78	5	>sp|P02750|A2GL_HUMAN Leucine-rich alpha-2-glycoprotein OS=Homo sapiens OX=9606 GN=LRG1 PE=1 SV=2	1095	20210911_zy_plasma_ethcd_2.3801.3801.3	controllerType=0 controllerNumber=1 scan=3801	17.1783
06235:3	7	K.ELHHLQEQN[+2569.905]VSNAFLDK.G	HexNAc(5)Hex(6)NeuAc(2)	N[+2570]	1531.64	3	4592.91	4591.91	1	-0.7	754	Specific	234.47	148.53	148.53	5.91	24	>sp|P00450|CERU_HUMAN Ceruloplasmin OS=Homo sapiens OX=9606 GN=CP PE=1 SV=1	460	20210911_zy_plasma_ethcd_2.6840.6840.3	controllerType=0 controllerNumber=1 scan=6840	30.689
03460:3	4	R.EEQFN[+1913.677]STFR.V	HexNAc(4)Hex(5)NeuAc(1)	N[+1914]	1024.4	3	3071.19	3071.2	0	-2.8	172	Specific	234.79	71.96	71.96	5.59	36	>sp|P01859|IGHG2_HUMAN Immunoglobulin heavy constant gamma 2 OS=Homo sapiens OX=9606 GN=IGHG2 PE=1 SV=2	2858	20210911_zy_plasma_ethcd_2.3802.3802.3	controllerType=0 controllerNumber=1 scan=3802	17.1829
05277:3	7	K.EHEGAIYPDN[+2569.905]TTDFQR.A	HexNAc(5)Hex(6)NeuAc(2)	N[+2570]	1488.25	3	4462.73	4462.75	0	-3.3	129	Specific	234.92	156.46	156.46	6.1	24	>sp|P00450|CERU_HUMAN Ceruloplasmin OS=Homo sapiens OX=9606 GN=CP PE=1 SV=1	460	20210911_zy_plasma_ethcd_2.5792.5792.3	controllerType=0 controllerNumber=1 scan=5792	26.0521
13063:3	13	R.QQQHLFGSN[+1913.677]VTDC[+57.021]SGNFC[+57.021]LFR.S	HexNAc(4)Hex(5)NeuAc(1)	C[+57]*2, N[+1914]	1476.93	3	4428.79	4428.8	0	-2.6	622	Specific	235.11	145.39	145.39	6.8	17	>sp|TRFE_HUMAN|(Common contaminant protein)	20484	20210911_zy_plasma_ethcd_2.14327.14327.3	controllerType=0 controllerNumber=1 scan=14327	64.3588
11708:3	1	K.VVLHPN[+1913.677]YSQVDIGLIK.L	HexNAc(4)Hex(5)NeuAc(1)	N[+1914]	1236.9	3	3708.68	3708.69	0	-2.6	236	Specific	236.1	46.86	46.86	5.99	151	>sp|P00738|HPT_HUMAN Haptoglobin OS=Homo sapiens OX=9606 GN=HP PE=1 SV=1	3044	20210911_zy_plasma_ethcd_2.12842.12842.3	controllerType=0 controllerNumber=1 scan=12842	57.6972
03294:3	19	K.EDALN[+2861.000]ETR.E	HexNAc(5)Hex(6)NeuAc(3)	N[+2861]	1270.15	3	3808.44	3808.44	0	-1.2	82	Specific	237.29	73.57	73.57	4.52	15	>sp|P10909|CLUS_HUMAN Clusterin OS=Homo sapiens OX=9606 GN=CLU PE=1 SV=1	6125	20210911_zy_plasma_ethcd_2.3620.3620.3	controllerType=0 controllerNumber=1 scan=3620	16.3645
03963:4	1	K.NLFLN[+3210.137]HSEN[+1419.502]ATAK.D	HexNAc(6)Hex(6)Fuc(1)NeuAc(3),HexNAc(3)Hex(5)	N[+1420][+3210]	1522.84	4	6088.36	6088.37	0	-2.7	203	Specific	237.54	237.54	1.72	5.93	151	>sp|P00738|HPT_HUMAN Haptoglobin OS=Homo sapiens OX=9606 GN=HP PE=1 SV=1	3044	20210911_zy_plasma_ethcd_2.4353.4353.4	controllerType=0 controllerNumber=1 scan=4353	19.6583
03066:2	5	K.TPLTAN[+1403.507]ITK.S	HexNAc(3)Hex(4)Fuc(1)	N[+1404]	1181.53	2	2362.06	2362.06	0	-3	200	Specific	237.93	99.67	99.67	5.63	33	>sp|P01877|IGHA2_HUMAN Immunoglobulin heavy constant alpha 2 OS=Homo sapiens OX=9606 GN=IGHA2 PE=1 SV=4	10403	20210911_zy_plasma_ethcd_2.3370.3370.3	controllerType=0 controllerNumber=1 scan=3370	15.2456
06341:4	7	K.ELHHLQEQN[+2204.772]VSNAFLDK.G	HexNAc(4)Hex(5)NeuAc(2)	N[+2205]	1057.45	4	4226.77	4226.78	0	-1.9	754	Specific	238.85	158.25	158.25	5.94	24	>sp|P00450|CERU_HUMAN Ceruloplasmin OS=Homo sapiens OX=9606 GN=CP PE=1 SV=1	460	20210911_zy_plasma_ethcd_2.6956.6956.3	controllerType=0 controllerNumber=1 scan=6956	31.1974
02674:3	24	K.FVEGSHN[+1872.651]STVSLTTK.N	HexNAc(3)Hex(6)NeuAc(1)	N[+1873]	1160.49	3	3479.45	3479.46	0	-2.2	3405	Specific	238.87	54.54	54.54	5.97	10	>sp|P04114|APOB_HUMAN Apolipoprotein B-100 OS=Homo sapiens OX=9606 GN=APOB PE=1 SV=2	6234	20210911_zy_plasma_ethcd_2.2941.2941.3	controllerType=0 controllerNumber=1 scan=2941	13.3392
05169:4	1	K.NLFLN[+1622.582]HSEN[+3663.286]ATAK.D	HexNAc(4)Hex(5),HexNAc(6)Hex(7)Fuc(1)NeuAc(4)	N[+1623][+3663]	1686.9	4	6744.6	6744.6	0	-0.5	203	Specific	239.27	239.27	9.27	5.05	151	>sp|P00738|HPT_HUMAN Haptoglobin OS=Homo sapiens OX=9606 GN=HP PE=1 SV=1	3044	20210911_zy_plasma_ethcd_2.5674.5674.4	controllerType=0 controllerNumber=1 scan=5674	25.5286
01997:3	8	R.EN[+3517.228]GTISR.Y	HexNAc(6)Hex(7)NeuAc(4)	N[+3517]	1432.21	3	4294.63	4293.62	1	2	102	Specific	239.6	30.17	30.17	1.99	30	>sp|P02763|A1AG1_HUMAN Alpha-1-acid glycoprotein 1 OS=Homo sapiens OX=9606 GN=ORM1 PE=1 SV=1	2208	20210911_zy_plasma_ethcd_2.2199.2199.3	controllerType=0 controllerNumber=1 scan=2199	10.0507
02828:3	8	R.EN[+3663.286]GTISR.Y	HexNAc(6)Hex(7)Fuc(1)NeuAc(4)	N[+3663]	1480.23	3	4438.68	4439.68	-1	0.7	102	Specific	239.74	31.1	31.1	2.75	30	>sp|P02763|A1AG1_HUMAN Alpha-1-acid glycoprotein 1 OS=Homo sapiens OX=9606 GN=ORM1 PE=1 SV=1	2208	20210911_zy_plasma_ethcd_2.3110.3110.3	controllerType=0 controllerNumber=1 scan=3110	14.0954
01211:3	2	K.N[+2059.735]NSDISSTR.G	HexNAc(4)Hex(5)Fuc(1)NeuAc(1)	N[+2060]	1018.4	3	3053.19	3053.19	0	-2	46	Specific	239.9	105.89	105.89	5.56	56	>sp|P01871|IGHM_HUMAN Immunoglobulin heavy constant mu OS=Homo sapiens OX=9606 GN=IGHM PE=1 SV=4	10127	20210911_zy_plasma_ethcd_2.1340.1340.2	controllerType=0 controllerNumber=1 scan=1340	6.293
04221:4	1	K.NLFLN[+1913.677]HSEN[+2204.772]ATAK.D	HexNAc(4)Hex(5)NeuAc(1),HexNAc(4)Hex(5)NeuAc(2)	N[+1914][+2205]	1395.05	4	5577.17	5577.18	0	-1.5	203	Specific	240.08	240.08	6.36	5.26	151	>sp|P00738|HPT_HUMAN Haptoglobin OS=Homo sapiens OX=9606 GN=HP PE=1 SV=1	3044	20210911_zy_plasma_ethcd_2.4635.4635.3	controllerType=0 controllerNumber=1 scan=4635	20.8985
07055:5	1	K.NLFLN[+3226.132]HSEN[+2204.772]ATAK.D	HexNAc(6)Hex(7)NeuAc(3),HexNAc(4)Hex(5)NeuAc(2)	N[+2205][+3226]	1378.53	5	6888.63	6889.64	-1	-1.2	203	Specific	240.1	139.93	15.86	5.85	151	>sp|P00738|HPT_HUMAN Haptoglobin OS=Homo sapiens OX=9606 GN=HP PE=1 SV=1	3044	20210911_zy_plasma_ethcd_2.7738.7738.5	controllerType=0 controllerNumber=1 scan=7738	34.6704
12569:3	8	R.QDQC[+57.021]IYN[+2569.905]TTYLNVQR.E	HexNAc(5)Hex(6)NeuAc(2)	C[+57], N[+2570]	1495.94	3	4485.79	4485.8	0	-1.9	87	Specific	240.2	145.64	145.64	6.4	30	>sp|P02763|A1AG1_HUMAN Alpha-1-acid glycoprotein 1 OS=Homo sapiens OX=9606 GN=ORM1 PE=1 SV=1	2208	20210911_zy_plasma_ethcd_2.13786.13786.3	controllerType=0 controllerNumber=1 scan=13786	61.9615
10189:3	8	R.QDQC[+57.021]IYN[+3081.095]TTYLNVQR.E	HexNAc(6)Hex(7)Fuc(1)NeuAc(2)	C[+57], N[+3081]	1666.33	3	4996.99	4996.99	0	-1.3	87	Specific	240.41	105.28	105.28	6.03	30	>sp|P02763|A1AG1_HUMAN Alpha-1-acid glycoprotein 1 OS=Homo sapiens OX=9606 GN=ORM1 PE=1 SV=1	2208	20210911_zy_plasma_ethcd_2.11175.11175.3	controllerType=0 controllerNumber=1 scan=11175	50.1583
07405:3	15	K.LGN[+2204.772]WSAMPSC[+57.021]K.A	HexNAc(4)Hex(5)NeuAc(2)	C[+57], N[+2205]	1152.45	3	3455.34	3455.34	0	-0.6	251	Specific	240.58	88.14	88.14	5.12	19	>sp|P02749|APOH_HUMAN Beta-2-glycoprotein 1 OS=Homo sapiens OX=9606 GN=APOH PE=1 SV=3	19971	20210911_zy_plasma_ethcd_2.8121.8121.3	controllerType=0 controllerNumber=1 scan=8121	36.3551
05107:3	1	K.NLFLN[+2861.000]HSENATAK.D	HexNAc(5)Hex(6)NeuAc(3)	N[+2861]	1440.58	3	4319.73	4319.73	0	-1.4	203	Specific	240.89	79.08	57.49	5.83	151	>sp|P00738|HPT_HUMAN Haptoglobin OS=Homo sapiens OX=9606 GN=HP PE=1 SV=1	3044	20210911_zy_plasma_ethcd_2.5606.5606.3	controllerType=0 controllerNumber=1 scan=5606	25.228
02559:2	4	R.EEQFN[+1241.454]STFR.V	HexNAc(3)Hex(3)Fuc(1)	N[+1241]	1199.99	2	2398.97	2398.98	0	-2	172	Specific	241.06	103.09	103.09	5.36	36	>sp|P01859|IGHG2_HUMAN Immunoglobulin heavy constant gamma 2 OS=Homo sapiens OX=9606 GN=IGHG2 PE=1 SV=2	2858	20210911_zy_plasma_ethcd_2.2815.2815.2	controllerType=0 controllerNumber=1 scan=2815	12.7889
07533:3	15	K.LGN[+2204.772]WSAMPSC[+57.021]K.A	HexNAc(4)Hex(5)NeuAc(2)	C[+57], N[+2205]	1152.45	3	3455.33	3455.34	0	-2.1	251	Specific	241.16	81.44	81.44	5.74	19	>sp|P02749|APOH_HUMAN Beta-2-glycoprotein 1 OS=Homo sapiens OX=9606 GN=APOH PE=1 SV=3	19971	20210911_zy_plasma_ethcd_2.8261.8261.3	controllerType=0 controllerNumber=1 scan=8261	36.9679
06046:3	51	R.VELEDFNGN[+2350.830]R.T	HexNAc(4)Hex(5)Fuc(1)NeuAc(2)	N[+2351]	1181.8	3	3543.38	3543.39	0	-2.6	181	Specific	241.31	123.91	123.91	5.79	2	>sp|O75636|FCN3_HUMAN Ficolin-3 OS=Homo sapiens OX=9606 GN=FCN3 PE=1 SV=2	8415	20210911_zy_plasma_ethcd_2.6633.6633.3	controllerType=0 controllerNumber=1 scan=6633	29.7764
02465:3	16	R.EEQFN[+2100.761]STYR.V	HexNAc(5)Hex(4)Fuc(1)NeuAc(1)	N[+2101]	1092.09	3	3274.27	3274.28	0	-3	173	Specific	241.58	68.89	68.89	5.58	24	>sp|P01861|IGHG4_HUMAN Immunoglobulin heavy constant gamma 4 OS=Homo sapiens OX=9606 GN=IGHG4 PE=1 SV=1	12793	20210911_zy_plasma_ethcd_2.2712.2712.3	controllerType=0 controllerNumber=1 scan=2712	12.332
01533:3	3	R.EEQYN[+1809.666]STYR.V	HexNAc(5)Hex(4)Fuc(1)	N[+1810]	1000.39	3	2999.17	2999.18	0	-3.8	295	Specific	242.2	111.15	111.15	5.66	53	>sp|P0DOX5|IGG1_HUMAN Immunoglobulin gamma-1 heavy chain OS=Homo sapiens OX=9606 PE=1 SV=2	10252	20210911_zy_plasma_ethcd_2.1693.1693.3	controllerType=0 controllerNumber=1 scan=1693	7.8662
01284:4	11	R.N[+2569.905]GTGHGN[+1913.677]STHHGPEYMR.C	HexNAc(5)Hex(6)NeuAc(2),HexNAc(4)Hex(5)NeuAc(1)	N[+1914][+2570]	1584.85	4	6336.36	6335.38	1	-2.5	240	Specific	242.36	242.36	7.69	6.67	25	>sp|P02790|HEMO_HUMAN Hemopexin OS=Homo sapiens OX=9606 GN=HPX PE=1 SV=2	9336	20210911_zy_plasma_ethcd_2.1420.1420.4	controllerType=0 controllerNumber=1 scan=1420	6.6531
02337:3	53	R.N[+2262.814]YTLTGR.D	HexNAc(5)Hex(5)Fuc(1)NeuAc(1)	N[+2263]	1029.75	3	3087.23	3087.24	0	-2.4	754	Specific	242.82	47.22	47.22	4.76	5	>sp|P10643|CO7_HUMAN Complement component C7 OS=Homo sapiens OX=9606 GN=C7 PE=1 SV=2	4350	20210911_zy_plasma_ethcd_2.2572.2572.3	controllerType=0 controllerNumber=1 scan=2572	11.7003
09710:3	14	R.QNQC[+57.021]FYN[+2935.037]SSYLNVQR.E	HexNAc(6)Hex(7)NeuAc(2)	C[+57], N[+2935]	1618.97	3	4854.9	4855.9	-1	-0.1	87	Specific	243.1	132.31	132.31	5.71	18	>sp|P19652|A1AG2_HUMAN Alpha-1-acid glycoprotein 2 OS=Homo sapiens OX=9606 GN=ORM2 PE=1 SV=2	4531	20210911_zy_plasma_ethcd_2.10649.10649.3	controllerType=0 controllerNumber=1 scan=10649	47.767
12227:3	13	K.C[+57.021]GLVPVLAENYN[+2569.905]K.S	HexNAc(5)Hex(6)NeuAc(2)	C[+57], N[+2570]	1349.55	3	4046.64	4046.66	0	-3.7	421	Specific	243.85	91.5	91.5	5.98	17	>sp|TRFE_HUMAN|(Common contaminant protein)	20484	20210911_zy_plasma_ethcd_2.13412.13412.3	controllerType=0 controllerNumber=1 scan=13412	60.303
07787:3	2	R.GLTFQQN[+2262.814]ASSM[+15.995]C[+57.021]VPDQDTAIR.V	HexNAc(5)Hex(5)Fuc(1)NeuAc(1)	C[+57], M[+16], N[+2263]	1539.96	3	4617.87	4617.88	0	-3.8	203	Specific	244.51	153.7	12.67	6.82	56	>sp|P01871|IGHM_HUMAN Immunoglobulin heavy constant mu OS=Homo sapiens OX=9606 GN=IGHM PE=1 SV=4	10127	20210911_zy_plasma_ethcd_2.8539.8539.3	controllerType=0 controllerNumber=1 scan=8539	38.2127
06419:2	31	R.GLN[+2204.772]VTLSSTGR.N	HexNAc(4)Hex(5)NeuAc(2)	N[+2205]	1655.19	2	3309.37	3309.37	0	-1.2	1326	Specific	244.68	80.27	80.27	5.19	4	>sp|P0C0L5|CO4B_HUMAN Complement C4-B OS=Homo sapiens OX=9606 GN=C4B PE=1 SV=2	4060	20210911_zy_plasma_ethcd_2.7041.7041.4	controllerType=0 controllerNumber=1 scan=7041	31.5747
14606:3	28	K.N[+2861.000]LSMPLLPADFHK.E	HexNAc(5)Hex(6)NeuAc(3)	N[+2861]	1448.59	3	4343.77	4343.78	0	-2	49	Specific	245.06	132.42	132.42	6.15	9	>sp|P05546|HEP2_HUMAN Heparin cofactor 2 OS=Homo sapiens OX=9606 GN=SERPIND1 PE=1 SV=3	4741	20210911_zy_plasma_ethcd_2.16018.16018.3	controllerType=0 controllerNumber=1 scan=16018	71.8212
01445:3	16	K.TKPREEQFN[+1606.587]STYR.V	HexNAc(4)Hex(4)Fuc(1)	N[+1607]	1088.13	3	3262.38	3262.4	0	-5.3	169	Specific	245.22	103.94	103.94	5.54	24	>sp|P01861|IGHG4_HUMAN Immunoglobulin heavy constant gamma 4 OS=Homo sapiens OX=9606 GN=IGHG4 PE=1 SV=1	12793	20210911_zy_plasma_ethcd_2.1597.1597.3	controllerType=0 controllerNumber=1 scan=1597	7.4564
04589:3	39	R.DTFVN[+2861.000]ASR.T	HexNAc(5)Hex(6)NeuAc(3)	N[+2861]	1257.48	3	3770.44	3770.44	0	-1.6	234	Specific	245.3	44.14	44.14	4.48	8	>sp|P05155|IC1_HUMAN Plasma protease C1 inhibitor OS=Homo sapiens OX=9606 GN=SERPING1 PE=1 SV=2	9291	20210911_zy_plasma_ethcd_2.5038.5038.3	controllerType=0 controllerNumber=1 scan=5038	22.6834
04692:3	39	R.DTFVN[+2861.000]ASR.T	HexNAc(5)Hex(6)NeuAc(3)	N[+2861]	1257.48	3	3770.43	3770.44	0	-3.5	234	Specific	245.38	33.82	33.82	4.18	8	>sp|P05155|IC1_HUMAN Plasma protease C1 inhibitor OS=Homo sapiens OX=9606 GN=SERPING1 PE=1 SV=2	9291	20210911_zy_plasma_ethcd_2.5151.5151.3	controllerType=0 controllerNumber=1 scan=5151	23.1948
12504:4	2	R.GLTFQQN[+2553.910]ASSMC[+57.021]VPDQDTAIR.V	HexNAc(5)Hex(5)Fuc(1)NeuAc(2)	C[+57], N[+2554]	1224	4	4892.97	4892.99	0	-3.6	203	Specific	245.66	148.2	148.2	6.88	56	>sp|P01871|IGHM_HUMAN Immunoglobulin heavy constant mu OS=Homo sapiens OX=9606 GN=IGHM PE=1 SV=4	10127	20210911_zy_plasma_ethcd_2.13714.13714.3	controllerType=0 controllerNumber=1 scan=13714	61.6413
01353:3	2	K.N[+2262.814]NSDISSTR.G	HexNAc(5)Hex(5)Fuc(1)NeuAc(1)	N[+2263]	1086.09	3	3256.27	3256.27	0	-2	46	Specific	246.32	71.61	71.61	5.75	56	>sp|P01871|IGHM_HUMAN Immunoglobulin heavy constant mu OS=Homo sapiens OX=9606 GN=IGHM PE=1 SV=4	10127	20210911_zy_plasma_ethcd_2.1496.1496.3	controllerType=0 controllerNumber=1 scan=1496	7.0034
05538:3	6	R.GTAGNALMDGASQLM[+15.995]GEN[+1622.582]R.T	HexNAc(4)Hex(5)	M[+16], N[+1623]	1177.82	3	3531.43	3531.44	0	-1.3	377	Specific	246.56	142.54	119.69	6.18	33	>sp|P02675|FIBB_HUMAN Fibrinogen beta chain OS=Homo sapiens OX=9606 GN=FGB PE=1 SV=2	6006	20210911_zy_plasma_ethcd_2.6078.6078.3	controllerType=0 controllerNumber=1 scan=6078	27.3246
13986:3	1	K.VVLHPN[+3372.190]YSQVDIGLIK.L	HexNAc(6)Hex(7)Fuc(1)NeuAc(3)	N[+3372]	1722.73	3	5166.19	5167.2	-1	-1.8	236	Specific	246.6	70.42	70.42	6.33	151	>sp|P00738|HPT_HUMAN Haptoglobin OS=Homo sapiens OX=9606 GN=HP PE=1 SV=1	3044	20210911_zy_plasma_ethcd_2.15338.15338.3	controllerType=0 controllerNumber=1 scan=15338	68.8168
01761:3	14	R.EN[+2861.000]GTVSR.Y	HexNAc(5)Hex(6)NeuAc(3)	N[+2861]	1208.46	3	3623.37	3623.37	0	-2.1	102	Specific	246.99	68.64	68.64	4.95	18	>sp|P19652|A1AG2_HUMAN Alpha-1-acid glycoprotein 2 OS=Homo sapiens OX=9606 GN=ORM2 PE=1 SV=2	4531	20210911_zy_plasma_ethcd_2.1942.1942.3	controllerType=0 controllerNumber=1 scan=1942	8.945
09204:4	1	K.NLFLN[+3663.286]HSEN[+2350.830]ATAK.D	HexNAc(6)Hex(7)Fuc(1)NeuAc(4),HexNAc(4)Hex(5)Fuc(1)NeuAc(2)	N[+2351][+3663]	1868.97	4	7472.84	7472.85	0	-1.2	203	Specific	247	130.95	8	5.47	151	>sp|P00738|HPT_HUMAN Haptoglobin OS=Homo sapiens OX=9606 GN=HP PE=1 SV=1	3044	20210911_zy_plasma_ethcd_2.10095.10095.4	controllerType=0 controllerNumber=1 scan=10095	45.2918
05334:4	26	R.YPHKPEIN[+2204.772]STTHPGADLQENFC[+57.021]R.N	HexNAc(4)Hex(5)NeuAc(2)	C[+57], N[+2205]	1229.76	4	4916.03	4916.04	0	-2.1	136	Specific	248.14	156.14	156.14	6.75	9	>sp|P00734|THRB_HUMAN Prothrombin OS=Homo sapiens OX=9606 GN=F2 PE=1 SV=2	18404	20210911_zy_plasma_ethcd_2.5854.5854.3	controllerType=0 controllerNumber=1 scan=5854	26.3269
09522:3	2	R.GLTFQQN[+2553.910]ASSM[+15.995]C[+57.021]VPDQDTAIR.V	HexNAc(5)Hex(5)Fuc(1)NeuAc(2)	C[+57], M[+16], N[+2554]	1636.66	3	4907.95	4908.98	-1	-4.9	203	Specific	248.7	130.79	66.65	6.51	56	>sp|P01871|IGHM_HUMAN Immunoglobulin heavy constant mu OS=Homo sapiens OX=9606 GN=IGHM PE=1 SV=4	10127	20210911_zy_plasma_ethcd_2.10443.10443.4	controllerType=0 controllerNumber=1 scan=10443	46.8357
07446:4	1	K.NLFLN[+1403.507]HSEN[+3663.286]ATAK.D	HexNAc(3)Hex(4)Fuc(1),HexNAc(6)Hex(7)Fuc(1)NeuAc(4)	N[+1404][+3663]	1631.88	4	6524.49	6525.53	-1	-4.9	203	Specific	249.06	249.06	2.36	5.74	151	>sp|P00738|HPT_HUMAN Haptoglobin OS=Homo sapiens OX=9606 GN=HP PE=1 SV=1	3044	20210911_zy_plasma_ethcd_2.8166.8166.4	controllerType=0 controllerNumber=1 scan=8166	36.5541
14061:3	1	K.VVLHPN[+2569.905]YSQVDIGLIK.L	HexNAc(5)Hex(6)NeuAc(2)	N[+2570]	1455.64	3	4364.91	4364.92	0	-1.8	236	Specific	249.15	132.76	132.76	6.4	151	>sp|P00738|HPT_HUMAN Haptoglobin OS=Homo sapiens OX=9606 GN=HP PE=1 SV=1	3044	20210911_zy_plasma_ethcd_2.15420.15420.3	controllerType=0 controllerNumber=1 scan=15420	69.1648
01112:3	2	K.N[+2018.708]NSDISSTR.G	HexNAc(3)Hex(6)Fuc(1)NeuAc(1)	N[+2019]	1004.72	3	3012.16	3012.17	0	-2.9	46	Specific	249.26	87.39	87.39	5.75	56	>sp|P01871|IGHM_HUMAN Immunoglobulin heavy constant mu OS=Homo sapiens OX=9606 GN=IGHM PE=1 SV=4	10127	20210911_zy_plasma_ethcd_2.1231.1231.3	controllerType=0 controllerNumber=1 scan=1231	5.802
13222:3	1	K.VVLHPN[+2935.037]YSQVDIGLIK.L	HexNAc(6)Hex(7)NeuAc(2)	N[+2935]	1577.35	3	4730.04	4730.05	0	-1.8	236	Specific	249.55	76.32	76.32	6.09	151	>sp|P00738|HPT_HUMAN Haptoglobin OS=Homo sapiens OX=9606 GN=HP PE=1 SV=1	3044	20210911_zy_plasma_ethcd_2.14501.14501.3	controllerType=0 controllerNumber=1 scan=14501	65.1301
01797:3	16	R.EEQFN[+1768.640]STYR.V	HexNAc(4)Hex(5)Fuc(1)	N[+1769]	981.389	3	2942.15	2942.16	0	-1.4	173	Specific	249.73	69.18	69.18	5.46	24	>sp|P01861|IGHG4_HUMAN Immunoglobulin heavy constant gamma 4 OS=Homo sapiens OX=9606 GN=IGHG4 PE=1 SV=1	12793	20210911_zy_plasma_ethcd_2.1981.1981.3	controllerType=0 controllerNumber=1 scan=1981	9.1112
02715:3	93	K.EN[+2861.000]LTAR.A	HexNAc(5)Hex(6)NeuAc(3)	N[+2861]	1188.79	3	3564.36	3564.37	0	-2.5	579	Specific	249.82	23.85	23.85	2.13	2	>sp|Q06033|ITIH3_HUMAN Inter-alpha-trypsin inhibitor heavy chain H3 OS=Homo sapiens OX=9606 GN=ITIH3 PE=1 SV=2	4115	20210911_zy_plasma_ethcd_2.2986.2986.3	controllerType=0 controllerNumber=1 scan=2986	13.5378
13243:3	22	K.VC[+57.021]QDC[+57.021]PLLAPLN[+1622.582]DTRVVHAAK.A	HexNAc(4)Hex(5)	C[+57]*2, N[+1623]	1333.93	3	3999.78	3999.79	0	-4.1	145	Specific	250.42	102.56	102.56	6.8	8	>sp|P02765|FETUA_HUMAN Alpha-2-HS-glycoprotein OS=Homo sapiens OX=9606 GN=AHSG PE=1 SV=2	4627	20210911_zy_plasma_ethcd_2.14524.14524.3	controllerType=0 controllerNumber=1 scan=14524	65.228
00956:3	16	K.TKPREEQFN[+1095.397]STYR.V	HexNAc(3)Hex(3)	N[+1095]	917.739	3	2751.2	2751.21	0	-2.4	169	Specific	250.51	58.65	58.65	5.63	24	>sp|P01861|IGHG4_HUMAN Immunoglobulin heavy constant gamma 4 OS=Homo sapiens OX=9606 GN=IGHG4 PE=1 SV=1	12793	20210911_zy_plasma_ethcd_2.1060.1060.3	controllerType=0 controllerNumber=1 scan=1060	5.0285
13263:3	1	K.VVLHPN[+2221.788]YSQVDIGLIK.L	HexNAc(4)Hex(6)Fuc(1)NeuAc(1)	N[+2222]	1339.27	3	4015.79	4016.8	-1	-2.5	236	Specific	250.63	163	163	6.16	151	>sp|P00738|HPT_HUMAN Haptoglobin OS=Homo sapiens OX=9606 GN=HP PE=1 SV=1	3044	20210911_zy_plasma_ethcd_2.14545.14545.3	controllerType=0 controllerNumber=1 scan=14545	65.3217
04396:3	44	R.GVNFN[+2204.772]VSK.V	HexNAc(4)Hex(5)NeuAc(2)	N[+2205]	1023.75	3	3069.22	3069.23	0	-2.6	123	Specific	250.74	112.82	112.82	4.58	9	>sp|P03952|KLKB1_HUMAN Plasma kallikrein OS=Homo sapiens OX=9606 GN=KLKB1 PE=1 SV=1	11889	20210911_zy_plasma_ethcd_2.4827.4827.3	controllerType=0 controllerNumber=1 scan=4827	21.7371
06256:4	7	K.ELHHLQEQN[+2569.905]VSNAFLDK.G	HexNAc(5)Hex(6)NeuAc(2)	N[+2570]	1148.48	4	4590.88	4591.91	-1	-5.3	754	Specific	250.89	185.71	185.71	6.22	24	>sp|P00450|CERU_HUMAN Ceruloplasmin OS=Homo sapiens OX=9606 GN=CP PE=1 SV=1	460	20210911_zy_plasma_ethcd_2.6863.6863.4	controllerType=0 controllerNumber=1 scan=6863	30.7893
02469:3	14	R.EN[+3663.286]GTVSR.Y	HexNAc(6)Hex(7)Fuc(1)NeuAc(4)	N[+3663]	1475.89	3	4425.66	4425.66	0	-0.7	102	Specific	251.05	79.53	79.53	4.4	18	>sp|P19652|A1AG2_HUMAN Alpha-1-acid glycoprotein 2 OS=Homo sapiens OX=9606 GN=ORM2 PE=1 SV=2	4531	20210911_zy_plasma_ethcd_2.2716.2716.3	controllerType=0 controllerNumber=1 scan=2716	12.3518
10297:3	8	R.QDQC[+57.021]IYN[+2569.905]TTYLNVQR.E	HexNAc(5)Hex(6)NeuAc(2)	C[+57], N[+2570]	1495.6	3	4484.79	4485.8	-1	-2.2	87	Specific	251.06	117.44	117.44	6.56	30	>sp|P02763|A1AG1_HUMAN Alpha-1-acid glycoprotein 1 OS=Homo sapiens OX=9606 GN=ORM1 PE=1 SV=1	2208	20210911_zy_plasma_ethcd_2.11293.11293.3	controllerType=0 controllerNumber=1 scan=11293	50.6933
09702:3	15	K.LGN[+2861.000]WSAMPSC[+57.021]K.A	HexNAc(5)Hex(6)NeuAc(3)	C[+57], N[+2861]	1371.19	3	4111.56	4111.57	0	-0.2	251	Specific	251.18	115.72	115.72	4.89	19	>sp|P02749|APOH_HUMAN Beta-2-glycoprotein 1 OS=Homo sapiens OX=9606 GN=APOH PE=1 SV=3	19971	20210911_zy_plasma_ethcd_2.10640.10640.3	controllerType=0 controllerNumber=1 scan=10640	47.7281
13692:4	1	K.M[+15.995]VSHHN[+2204.772]LTTGATLINEQWLLTTAK.N	HexNAc(4)Hex(5)NeuAc(2)	M[+16], N[+2205]	1225.79	4	4900.15	4900.16	0	-2.5	179	Specific	251.56	216.64	216.64	6.55	151	>sp|P00738|HPT_HUMAN Haptoglobin OS=Homo sapiens OX=9606 GN=HP PE=1 SV=1	3044	20210911_zy_plasma_ethcd_2.15017.15017.4	controllerType=0 controllerNumber=1 scan=15017	67.4149
08584:3	11	R.SWPAVGN[+2204.772]C[+57.021]SSALR.W	HexNAc(4)Hex(5)NeuAc(2)	C[+57], N[+2205]	1203.82	3	3609.43	3609.44	0	-2.3	181	Specific	251.72	113.53	113.53	6.06	25	>sp|P02790|HEMO_HUMAN Hemopexin OS=Homo sapiens OX=9606 GN=HPX PE=1 SV=2	9336	20210911_zy_plasma_ethcd_2.9413.9413.3	controllerType=0 controllerNumber=1 scan=9413	42.1344
06627:3	2	R.GLTFQQN[+2407.852]ASSMC[+57.021]VPDQDTAIR.V	HexNAc(5)Hex(5)NeuAc(2)	C[+57], N[+2408]	1582.64	3	4745.92	4746.93	-1	-1.5	203	Specific	252.34	122.99	37.63	6.8	56	>sp|P01871|IGHM_HUMAN Immunoglobulin heavy constant mu OS=Homo sapiens OX=9606 GN=IGHM PE=1 SV=4	10127	20210911_zy_plasma_ethcd_2.7269.7269.3	controllerType=0 controllerNumber=1 scan=7269	32.5669
04127:4	1	K.NLFLN[+2759.005]HSEN[+1751.624]ATAK.D	HexNAc(8)Hex(7),HexNAc(4)Hex(4)NeuAc(1)	N[+1752][+2759]	1493.34	4	5970.33	5969.36	1	-6.1	203	Specific	252.55	252.55	1.03	5.75	151	>sp|P00738|HPT_HUMAN Haptoglobin OS=Homo sapiens OX=9606 GN=HP PE=1 SV=1	3044	20210911_zy_plasma_ethcd_2.4533.4533.4	controllerType=0 controllerNumber=1 scan=4533	20.4461
01036:3	3	K.TKPREEQYN[+1663.608]STYR.V	HexNAc(5)Hex(4)	N[+1664]	1112.47	3	3335.41	3335.42	0	-2.9	291	Specific	252.63	122.55	122.55	6.02	53	>sp|P0DOX5|IGG1_HUMAN Immunoglobulin gamma-1 heavy chain OS=Homo sapiens OX=9606 PE=1 SV=2	10252	20210911_zy_plasma_ethcd_2.1147.1147.3	controllerType=0 controllerNumber=1 scan=1147	5.4177
03797:3	12	K.MDGASN[+2204.772]VTC[+57.021]INSR.W	HexNAc(4)Hex(5)NeuAc(2)	C[+57], N[+2205]	1210.47	3	3629.39	3629.4	0	-3.3	1024	Specific	252.78	87.29	87.29	5.89	17	>sp|P08603|CFAH_HUMAN Complement factor H OS=Homo sapiens OX=9606 GN=CFH PE=1 SV=4	385	20210911_zy_plasma_ethcd_2.4172.4172.3	controllerType=0 controllerNumber=1 scan=4172	18.8465
01769:3	4	K.TKPREEQFN[+1606.587]STFR.V	HexNAc(4)Hex(4)Fuc(1)	N[+1607]	1082.8	3	3246.4	3246.41	0	-2.9	168	Specific	253.96	126.06	126.06	6.11	36	>sp|P01859|IGHG2_HUMAN Immunoglobulin heavy constant gamma 2 OS=Homo sapiens OX=9606 GN=IGHG2 PE=1 SV=2	2858	20210911_zy_plasma_ethcd_2.1950.1950.3	controllerType=0 controllerNumber=1 scan=1950	8.9807
03676:4	5	K.HYTN[+2350.830]SSQDVTVPC[+57.021]RVPPPPPC[+57.021]C[+57.021]HPR.L	HexNAc(4)Hex(5)Fuc(1)NeuAc(2)	C[+57]*3, N[+2351]	1328.05	4	5309.17	5309.19	0	-2.9	89	Specific	254.19	189.42	77.97	6.73	33	>sp|P01877|IGHA2_HUMAN Immunoglobulin heavy constant alpha 2 OS=Homo sapiens OX=9606 GN=IGHA2 PE=1 SV=4	10403	20210911_zy_plasma_ethcd_2.4039.4039.4	controllerType=0 controllerNumber=1 scan=4039	18.2533
03357:3	55	K.ANQQLN[+1913.677]FTEAK.E	HexNAc(4)Hex(5)NeuAc(1)	N[+1914]	1059.77	3	3177.3	3177.31	0	-2.7	48	Specific	254.24	104.3	104.3	5.76	3	>sp|Q9Y5Y7|LYVE1_HUMAN Lymphatic vessel endothelial hyaluronic acid receptor 1 OS=Homo sapiens OX=9606 GN=LYVE1 PE=1 SV=2	9455	20210911_zy_plasma_ethcd_2.3689.3689.3	controllerType=0 controllerNumber=1 scan=3689	16.6728
08073:3	17	R.ITYSIVQTN[+2861.000]C[+57.021]SK.E	HexNAc(5)Hex(6)NeuAc(3)	C[+57], N[+2861]	1425.57	3	4274.7	4274.7	0	0.2	197	Specific	254.58	112.88	112.88	4.93	18	>sp|P01042|KNG1_HUMAN Kininogen-1 OS=Homo sapiens OX=9606 GN=KNG1 PE=1 SV=2	6533	20210911_zy_plasma_ethcd_2.8853.8853.3	controllerType=0 controllerNumber=1 scan=8853	39.6163
05472:3	29	R.HFDVAHVSTAATSN[+1378.476]FSAVR.D	HexNAc(2)Hex(6)	N[+1378]	1132.49	3	3395.45	3395.46	0	-4.5	2109	Specific	254.67	210.13	210.13	6.07	5	>sp|P01266|THYG_HUMAN Thyroglobulin OS=Homo sapiens OX=9606 GN=TG PE=1 SV=5	17152	20210911_zy_plasma_ethcd_2.6005.6005.3	controllerType=0 controllerNumber=1 scan=6005	26.9988
06617:3	2	R.GLTFQQN[+2407.852]ASSMC[+57.021]VPDQDTAIR.V	HexNAc(5)Hex(5)NeuAc(2)	C[+57], N[+2408]	1582.98	3	4746.92	4746.93	0	-1.8	203	Specific	254.67	131.58	30.55	6.85	56	>sp|P01871|IGHM_HUMAN Immunoglobulin heavy constant mu OS=Homo sapiens OX=9606 GN=IGHM PE=1 SV=4	10127	20210911_zy_plasma_ethcd_2.7258.7258.3	controllerType=0 controllerNumber=1 scan=7258	32.519
10492:3	22	K.VC[+57.021]QDC[+57.021]PLLAPLN[+1913.677]DTR.V	HexNAc(4)Hex(5)NeuAc(1)	C[+57]*2, N[+1914]	1229.18	3	3685.52	3685.52	0	-1.3	145	Specific	254.74	131.07	131.07	6.06	8	>sp|P02765|FETUA_HUMAN Alpha-2-HS-glycoprotein OS=Homo sapiens OX=9606 GN=AHSG PE=1 SV=2	4627	20210911_zy_plasma_ethcd_2.11507.11507.3	controllerType=0 controllerNumber=1 scan=11507	51.6466
07193:5	1	K.NLFLN[+3517.228]HSEN[+1913.677]ATAK.D	HexNAc(6)Hex(7)NeuAc(4),HexNAc(4)Hex(5)NeuAc(1)	N[+1914][+3517]	1378.73	5	6889.63	6889.64	0	-1.6	203	Specific	254.83	254.83	0	5.93	151	>sp|P00738|HPT_HUMAN Haptoglobin OS=Homo sapiens OX=9606 GN=HP PE=1 SV=1	3044	20210911_zy_plasma_ethcd_2.7889.7889.5	controllerType=0 controllerNumber=1 scan=7889	35.3347
13041:3	22	K.VC[+57.021]QDC[+57.021]PLLAPLN[+2204.772]DTR.V	HexNAc(4)Hex(5)NeuAc(2)	C[+57]*2, N[+2205]	1326.21	3	3976.62	3976.62	0	1.1	145	Specific	255.01	126	126	5.12	8	>sp|P02765|FETUA_HUMAN Alpha-2-HS-glycoprotein OS=Homo sapiens OX=9606 GN=AHSG PE=1 SV=2	4627	20210911_zy_plasma_ethcd_2.14302.14302.3	controllerType=0 controllerNumber=1 scan=14302	64.2495
11816:3	30	R.ADGTVNQIEGEATPVN[+2350.830]LTEPAK.L	HexNAc(4)Hex(5)Fuc(1)NeuAc(2)	N[+2351]	1535.65	3	4604.93	4604.95	0	-4.7	83	Specific	255.2	165.54	59.39	6.29	6	>sp|P05090|APOD_HUMAN Apolipoprotein D OS=Homo sapiens OX=9606 GN=APOD PE=1 SV=1	120	20210911_zy_plasma_ethcd_2.12961.12961.3	controllerType=0 controllerNumber=1 scan=12961	58.2477
01311:2	24	K.SYN[+2204.772]ETK.I	HexNAc(4)Hex(5)NeuAc(2)	N[+2205]	1473.56	2	2946.11	2946.11	0	-1.9	3222	Specific	255.33	27.03	27.03	4.35	10	>sp|P04114|APOB_HUMAN Apolipoprotein B-100 OS=Homo sapiens OX=9606 GN=APOB PE=1 SV=2	6234	20210911_zy_plasma_ethcd_2.1450.1450.2	controllerType=0 controllerNumber=1 scan=1450	6.7923
04887:3	4	R.EEQFN[+2553.910]STFR.V	HexNAc(5)Hex(5)Fuc(1)NeuAc(2)	N[+2554]	1237.81	3	3711.43	3711.43	0	-1.1	172	Specific	255.48	78.67	78.67	5.14	36	>sp|P01859|IGHG2_HUMAN Immunoglobulin heavy constant gamma 2 OS=Homo sapiens OX=9606 GN=IGHG2 PE=1 SV=2	2858	20210911_zy_plasma_ethcd_2.5365.5365.3	controllerType=0 controllerNumber=1 scan=5365	24.1529
01446:3	2	K.N[+2262.814]NSDISSTR.G	HexNAc(5)Hex(5)Fuc(1)NeuAc(1)	N[+2263]	1086.09	3	3256.27	3256.27	0	-2.1	46	Specific	256.62	94.38	94.38	5.74	56	>sp|P01871|IGHM_HUMAN Immunoglobulin heavy constant mu OS=Homo sapiens OX=9606 GN=IGHM PE=1 SV=4	10127	20210911_zy_plasma_ethcd_2.1598.1598.3	controllerType=0 controllerNumber=1 scan=1598	7.4615
02632:3	15	K.PSAGN[+2350.830]NSLYR.D	HexNAc(4)Hex(5)Fuc(1)NeuAc(2)	N[+2351]	1143.79	3	3429.36	3429.36	0	-0.5	158	Specific	256.66	74.47	74.47	4.41	19	>sp|P02749|APOH_HUMAN Beta-2-glycoprotein 1 OS=Homo sapiens OX=9606 GN=APOH PE=1 SV=3	19971	20210911_zy_plasma_ethcd_2.2895.2895.3	controllerType=0 controllerNumber=1 scan=2895	13.1345
01233:3	3	K.PREEQYN[+1298.476]STYR.V	HexNAc(4)Hex(3)	N[+1298]	914.383	3	2741.13	2741.14	0	-2.5	293	Specific	256.72	134.06	134.06	5.37	53	>sp|P0DOX5|IGG1_HUMAN Immunoglobulin gamma-1 heavy chain OS=Homo sapiens OX=9606 PE=1 SV=2	10252	20210911_zy_plasma_ethcd_2.1364.1364.3	controllerType=0 controllerNumber=1 scan=1364	6.4032
08127:4	7	K.ELHHLQEQN[+2861.000]VSNAFLDK.G	HexNAc(5)Hex(6)NeuAc(3)	N[+2861]	1221.25	4	4881.98	4883	-1	-4.1	754	Specific	256.83	208.85	208.85	6.66	24	>sp|P00450|CERU_HUMAN Ceruloplasmin OS=Homo sapiens OX=9606 GN=CP PE=1 SV=1	460	20210911_zy_plasma_ethcd_2.8912.8912.4	controllerType=0 controllerNumber=1 scan=8912	39.8846
04391:3	44	R.GVNFN[+2204.772]VSK.V	HexNAc(4)Hex(5)NeuAc(2)	N[+2205]	1023.75	3	3069.22	3069.23	0	-2.8	123	Specific	257.16	113.15	113.15	4.81	9	>sp|P03952|KLKB1_HUMAN Plasma kallikrein OS=Homo sapiens OX=9606 GN=KLKB1 PE=1 SV=1	11889	20210911_zy_plasma_ethcd_2.4821.4821.3	controllerType=0 controllerNumber=1 scan=4821	21.7115
04166:3	32	R.FGC[+57.021]EIENN[+2861.000]R.S	HexNAc(5)Hex(6)NeuAc(3)	C[+57], N[+2861]	1333.83	3	3999.49	3999.49	0	-2.3	121	Specific	257.28	106.08	106.08	5.74	6	>sp|P25311|ZA2G_HUMAN Zinc-alpha-2-glycoprotein OS=Homo sapiens OX=9606 GN=AZGP1 PE=1 SV=2	18783	20210911_zy_plasma_ethcd_2.4575.4575.3	controllerType=0 controllerNumber=1 scan=4575	20.6323
15124:3	36	K.YTGN[+2861.000]ASALFILPDQDK.M	HexNAc(5)Hex(6)NeuAc(3)	N[+2861]	1538.64	3	4613.9	4613.88	0	3.5	268	Specific	257.47	127.2	127.2	4.62	8	>sp|P01011|AACT_HUMAN Alpha-1-antichymotrypsin OS=Homo sapiens OX=9606 GN=SERPINA3 PE=1 SV=2	8788	20210911_zy_plasma_ethcd_2.16586.16586.3	controllerType=0 controllerNumber=1 scan=16586	74.3493
09521:3	17	K.LNAENN[+2350.830]ATFYFK.I	HexNAc(4)Hex(5)Fuc(1)NeuAc(2)	N[+2351]	1261.51	3	3782.51	3782.52	0	-1.7	289	Specific	258.01	88.09	88.09	5.76	18	>sp|P01042|KNG1_HUMAN Kininogen-1 OS=Homo sapiens OX=9606 GN=KNG1 PE=1 SV=2	6533	20210911_zy_plasma_ethcd_2.10442.10442.3	controllerType=0 controllerNumber=1 scan=10442	46.8311
04494:3	20	R.EN[+2059.735]ISDPTSPLR.T	HexNAc(4)Hex(5)Fuc(1)NeuAc(1)	N[+2060]	1096.79	3	3288.34	3288.35	0	-2.7	70	Specific	258.16	111.55	111.55	5.76	13	>sp|P01591|IGJ_HUMAN Immunoglobulin J chain OS=Homo sapiens OX=9606 GN=JCHAIN PE=1 SV=4	4401	20210911_zy_plasma_ethcd_2.4934.4934.3	controllerType=0 controllerNumber=1 scan=4934	22.2118
01912:3	8	R.NEEYN[+2861.000]K.S	HexNAc(5)Hex(6)NeuAc(3)	N[+2861]	1219.78	3	3657.34	3657.35	0	-2.1	52	Specific	258.17	79.46	79.46	4.95	30	>sp|P02763|A1AG1_HUMAN Alpha-1-acid glycoprotein 1 OS=Homo sapiens OX=9606 GN=ORM1 PE=1 SV=1	2208	20210911_zy_plasma_ethcd_2.2107.2107.3	controllerType=0 controllerNumber=1 scan=2107	9.6503
05610:4	1	K.NLFLN[+2861.000]HSEN[+1913.677]ATAK.D	HexNAc(5)Hex(6)NeuAc(3),HexNAc(4)Hex(5)NeuAc(1)	N[+1914][+2861]	1559.11	4	6233.4	6233.41	0	-1.3	203	Specific	258.32	258.32	0	5.78	151	>sp|P00738|HPT_HUMAN Haptoglobin OS=Homo sapiens OX=9606 GN=HP PE=1 SV=1	3044	20210911_zy_plasma_ethcd_2.6157.6157.4	controllerType=0 controllerNumber=1 scan=6157	27.6769
01405:3	8	R.NEEYN[+2715.963]K.S	HexNAc(5)Hex(6)Fuc(1)NeuAc(2)	N[+2716]	1171.44	3	3512.3	3512.31	0	-3.5	52	Specific	258.75	69.96	69.96	4.8	30	>sp|P02763|A1AG1_HUMAN Alpha-1-acid glycoprotein 1 OS=Homo sapiens OX=9606 GN=ORM1 PE=1 SV=1	2208	20210911_zy_plasma_ethcd_2.1553.1553.3	controllerType=0 controllerNumber=1 scan=1553	7.2561
12678:3	8	R.QDQC[+57.021]IYN[+2569.905]TTYLNVQR.E	HexNAc(5)Hex(6)NeuAc(2)	C[+57], N[+2570]	1495.94	3	4485.79	4485.8	0	-2	87	Specific	259.17	142.28	142.28	6.4	30	>sp|P02763|A1AG1_HUMAN Alpha-1-acid glycoprotein 1 OS=Homo sapiens OX=9606 GN=ORM1 PE=1 SV=1	2208	20210911_zy_plasma_ethcd_2.13905.13905.3	controllerType=0 controllerNumber=1 scan=13905	62.4825
05361:4	1	K.NLFLN[+3007.058]HSEN[+1930.692]ATAK.D	HexNAc(5)Hex(6)Fuc(1)NeuAc(3),HexNAc(4)Hex(6)Fuc(1)	N[+1931][+3007]	1599.88	4	6396.48	6396.48	0	-0.1	203	Specific	259.3	259.3	0	5.21	151	>sp|P00738|HPT_HUMAN Haptoglobin OS=Homo sapiens OX=9606 GN=HP PE=1 SV=1	3044	20210911_zy_plasma_ethcd_2.5884.5884.4	controllerType=0 controllerNumber=1 scan=5884	26.4547
13797:4	14	R.QNQC[+57.021]FYN[+3517.228]SSYLNVQR.E	HexNAc(6)Hex(7)NeuAc(4)	C[+57], N[+3517]	1360.03	4	5437.1	5438.09	-1	1.6	87	Specific	259.36	125.34	125.34	5.41	18	>sp|P19652|A1AG2_HUMAN Alpha-1-acid glycoprotein 2 OS=Homo sapiens OX=9606 GN=ORM2 PE=1 SV=2	4531	20210911_zy_plasma_ethcd_2.15132.15132.4	controllerType=0 controllerNumber=1 scan=15132	67.9229
12420:3	67	K.GVPQPN[+2569.905]ITWLKR.G	HexNAc(5)Hex(6)NeuAc(2)	N[+2570]	1326.91	3	3978.71	3978.71	0	0	1325	Specific	259.47	64.69	64.69	3.3	7	>sp|P82987|ATL3_HUMAN ADAMTS-like protein 3 OS=Homo sapiens OX=9606 GN=ADAMTSL3 PE=1 SV=4	20246	20210911_zy_plasma_ethcd_2.13623.13623.4	controllerType=0 controllerNumber=1 scan=13623	61.2436
03002:3	15	R.VYKPSAGN[+2715.963]NSLYR.D	HexNAc(5)Hex(6)Fuc(1)NeuAc(2)	N[+2716]	1395.57	3	4184.71	4184.72	0	-1.7	155	Specific	260.54	97.79	97.79	5.76	19	>sp|P02749|APOH_HUMAN Beta-2-glycoprotein 1 OS=Homo sapiens OX=9606 GN=APOH PE=1 SV=3	19971	20210911_zy_plasma_ethcd_2.3300.3300.3	controllerType=0 controllerNumber=1 scan=3300	14.9367
03206:3	54	K.TLFC[+57.021]N[+2204.772]ASK.E	HexNAc(4)Hex(5)NeuAc(2)	C[+57], N[+2205]	1049.08	3	3145.22	3145.23	0	-2	60	Specific	260.66	98.94	98.94	4.89	4	>sp|P20851|C4BPB_HUMAN C4b-binding protein beta chain OS=Homo sapiens OX=9606 GN=C4BPB PE=1 SV=1	20233	20210911_zy_plasma_ethcd_2.3523.3523.3	controllerType=0 controllerNumber=1 scan=3523	15.928
03862:4	1	K.NLFLN[+2278.809]HSEN[+2569.905]ATAK.D	HexNAc(5)Hex(6)NeuAc(1),HexNAc(5)Hex(6)NeuAc(2)	N[+2279][+2570]	1577.37	4	6306.45	6307.45	-1	0.5	203	Specific	260.69	132.28	11.78	5.13	151	>sp|P00738|HPT_HUMAN Haptoglobin OS=Homo sapiens OX=9606 GN=HP PE=1 SV=1	3044	20210911_zy_plasma_ethcd_2.4243.4243.4	controllerType=0 controllerNumber=1 scan=4243	19.1646
05892:4	1	K.NLFLN[+2861.000]HSEN[+1548.545]ATAK.D	HexNAc(5)Hex(6)NeuAc(3),HexNAc(3)Hex(4)NeuAc(1)	N[+1549][+2861]	1467.57	4	5867.28	5868.28	-1	0	203	Specific	261.38	148.64	4.6	5.45	151	>sp|P00738|HPT_HUMAN Haptoglobin OS=Homo sapiens OX=9606 GN=HP PE=1 SV=1	3044	20210911_zy_plasma_ethcd_2.6465.6465.4	controllerType=0 controllerNumber=1 scan=6465	29.0285
13044:3	22	K.VC[+57.021]QDC[+57.021]PLLAPLN[+2204.772]DTR.V	HexNAc(4)Hex(5)NeuAc(2)	C[+57]*2, N[+2205]	1326.21	3	3976.61	3976.62	0	-1.4	145	Specific	261.69	155.35	155.35	6.05	8	>sp|P02765|FETUA_HUMAN Alpha-2-HS-glycoprotein OS=Homo sapiens OX=9606 GN=AHSG PE=1 SV=2	4627	20210911_zy_plasma_ethcd_2.14306.14306.3	controllerType=0 controllerNumber=1 scan=14306	64.2652
02223:3	16	R.EEQFN[+2059.735]STYR.V	HexNAc(4)Hex(5)Fuc(1)NeuAc(1)	N[+2060]	1078.42	3	3233.24	3233.25	0	-2.3	173	Specific	261.92	93.92	93.92	5.68	24	>sp|P01861|IGHG4_HUMAN Immunoglobulin heavy constant gamma 4 OS=Homo sapiens OX=9606 GN=IGHG4 PE=1 SV=1	12793	20210911_zy_plasma_ethcd_2.2447.2447.3	controllerType=0 controllerNumber=1 scan=2447	11.1312
00904:3	2	K.N[+1809.666]NSDISSTR.G	HexNAc(5)Hex(4)Fuc(1)	N[+1810]	935.044	3	2803.12	2803.13	0	-2.4	46	Specific	262.65	105.23	105.23	5.17	56	>sp|P01871|IGHM_HUMAN Immunoglobulin heavy constant mu OS=Homo sapiens OX=9606 GN=IGHM PE=1 SV=4	10127	20210911_zy_plasma_ethcd_2.1003.1003.3	controllerType=0 controllerNumber=1 scan=1003	4.7697
06380:3	31	R.GLN[+2204.772]VTLSSTGR.N	HexNAc(4)Hex(5)NeuAc(2)	N[+2205]	1103.79	3	3309.36	3309.37	0	-3.1	1326	Specific	262.66	107.58	107.58	5.52	4	>sp|P0C0L5|CO4B_HUMAN Complement C4-B OS=Homo sapiens OX=9606 GN=C4B PE=1 SV=2	4060	20210911_zy_plasma_ethcd_2.6999.6999.3	controllerType=0 controllerNumber=1 scan=6999	31.3854
01674:3	2	K.N[+2350.830]NSDISSTR.G	HexNAc(4)Hex(5)Fuc(1)NeuAc(2)	N[+2351]	1115.43	3	3344.28	3344.29	0	-2	46	Specific	263.03	101.41	101.41	5.69	56	>sp|P01871|IGHM_HUMAN Immunoglobulin heavy constant mu OS=Homo sapiens OX=9606 GN=IGHM PE=1 SV=4	10127	20210911_zy_plasma_ethcd_2.1847.1847.3	controllerType=0 controllerNumber=1 scan=1847	8.5263
03067:4	1	K.NLFLN[+2569.905]HSEN[+1257.449]ATAK.D	HexNAc(5)Hex(6)NeuAc(2),HexNAc(3)Hex(4)	N[+1257][+2570]	1322.03	4	5285.08	5286.09	-1	0	203	Specific	263.24	263.24	3.11	4.82	151	>sp|P00738|HPT_HUMAN Haptoglobin OS=Homo sapiens OX=9606 GN=HP PE=1 SV=1	3044	20210911_zy_plasma_ethcd_2.3371.3371.4	controllerType=0 controllerNumber=1 scan=3371	15.2502
01577:3	61	K.WVSN[+2204.772]KTEGR.I	HexNAc(4)Hex(5)NeuAc(2)	N[+2205]	1094.44	3	3281.32	3281.32	0	-1.4	221	Specific	263.81	28.31	28.31	3.38	7	>sp|P01008|ANT3_HUMAN Antithrombin-III OS=Homo sapiens OX=9606 GN=SERPINC1 PE=1 SV=1	546	20210911_zy_plasma_ethcd_2.1741.1741.3	controllerType=0 controllerNumber=1 scan=1741	8.0745
08482:3	6	K.YRGTAGNALM[+15.995]DGASQLMGEN[+2204.772]R.T	HexNAc(4)Hex(5)NeuAc(2)	M[+16], N[+2205]	1478.27	3	4432.78	4432.79	0	-2.3	375	Specific	263.86	167.35	82.13	6.83	33	>sp|P02675|FIBB_HUMAN Fibrinogen beta chain OS=Homo sapiens OX=9606 GN=FGB PE=1 SV=2	6006	20210911_zy_plasma_ethcd_2.9301.9301.3	controllerType=0 controllerNumber=1 scan=9301	41.6197
05609:4	1	K.NLFLN[+2861.000]HSEN[+1548.545]ATAK.D	HexNAc(5)Hex(6)NeuAc(3),HexNAc(3)Hex(4)NeuAc(1)	N[+1549][+2861]	1467.57	4	5867.26	5868.28	-1	-2.1	203	Specific	264.36	125.27	4.6	6.27	151	>sp|P00738|HPT_HUMAN Haptoglobin OS=Homo sapiens OX=9606 GN=HP PE=1 SV=1	3044	20210911_zy_plasma_ethcd_2.6156.6156.4	controllerType=0 controllerNumber=1 scan=6156	27.6733
09739:3	13	K.C[+57.021]GLVPVLAENYN[+1913.677]K.S	HexNAc(4)Hex(5)NeuAc(1)	C[+57], N[+1914]	1130.81	3	3390.42	3390.43	0	-2.8	421	Specific	264.62	154.06	154.06	6.1	17	>sp|TRFE_HUMAN|(Common contaminant protein)	20484	20210911_zy_plasma_ethcd_2.10681.10681.3	controllerType=0 controllerNumber=1 scan=10681	47.909
04368:3	51	R.VELEDFNGN[+2059.735]R.T	HexNAc(4)Hex(5)Fuc(1)NeuAc(1)	N[+2060]	1084.77	3	3252.29	3252.29	0	-1.6	181	Specific	264.69	121.11	121.11	5.43	2	>sp|O75636|FCN3_HUMAN Ficolin-3 OS=Homo sapiens OX=9606 GN=FCN3 PE=1 SV=2	8415	20210911_zy_plasma_ethcd_2.4796.4796.3	controllerType=0 controllerNumber=1 scan=4796	21.6005
06865:3	7	K.EHEGAIYPDN[+3007.058]TTDFQR.A	HexNAc(5)Hex(6)Fuc(1)NeuAc(3)	N[+3007]	1633.97	3	4899.9	4899.9	0	-0.2	129	Specific	264.69	163.44	163.44	5.53	24	>sp|P00450|CERU_HUMAN Ceruloplasmin OS=Homo sapiens OX=9606 GN=CP PE=1 SV=1	460	20210911_zy_plasma_ethcd_2.7529.7529.3	controllerType=0 controllerNumber=1 scan=7529	33.7317
03529:3	15	K.PSAGN[+3007.058]NSLYR.D	HexNAc(5)Hex(6)Fuc(1)NeuAc(3)	N[+3007]	1362.53	3	4085.59	4085.59	0	1.1	158	Specific	264.96	66.12	66.12	4.51	19	>sp|P02749|APOH_HUMAN Beta-2-glycoprotein 1 OS=Homo sapiens OX=9606 GN=APOH PE=1 SV=3	19971	20210911_zy_plasma_ethcd_2.3878.3878.3	controllerType=0 controllerNumber=1 scan=3878	17.5324
03155:3	12	K.M[+15.995]DGASN[+2204.772]VTC[+57.021]INSR.W	HexNAc(4)Hex(5)NeuAc(2)	C[+57], M[+16], N[+2205]	1215.8	3	3645.39	3645.39	0	-2.1	1024	Specific	265.08	71.05	71.05	6.02	17	>sp|P08603|CFAH_HUMAN Complement factor H OS=Homo sapiens OX=9606 GN=CFH PE=1 SV=4	385	20210911_zy_plasma_ethcd_2.3467.3467.3	controllerType=0 controllerNumber=1 scan=3467	15.6829
09711:3	15	K.LGN[+2861.000]WSAMPSC[+57.021]K.A	HexNAc(5)Hex(6)NeuAc(3)	C[+57], N[+2861]	1371.19	3	4111.56	4111.57	0	-1.2	251	Specific	265.44	96.99	96.99	5.39	19	>sp|P02749|APOH_HUMAN Beta-2-glycoprotein 1 OS=Homo sapiens OX=9606 GN=APOH PE=1 SV=3	19971	20210911_zy_plasma_ethcd_2.10650.10650.3	controllerType=0 controllerNumber=1 scan=10650	47.7717
01984:3	8	R.EN[+3372.190]GTISR.Y	HexNAc(6)Hex(7)Fuc(1)NeuAc(3)	N[+3372]	1383.53	3	4148.57	4148.58	0	-2.5	102	Specific	265.55	31.31	31.31	4.28	30	>sp|P02763|A1AG1_HUMAN Alpha-1-acid glycoprotein 1 OS=Homo sapiens OX=9606 GN=ORM1 PE=1 SV=1	2208	20210911_zy_plasma_ethcd_2.2185.2185.3	controllerType=0 controllerNumber=1 scan=2185	9.9866
03179:3	57	R.TLLN[+2553.910]ASR.S	HexNAc(5)Hex(5)Fuc(1)NeuAc(2)	N[+2554]	1110.12	3	3328.35	3328.36	0	-2.9	493	Specific	265.63	75.17	75.17	4.92	5	>sp|P0DOX3|IGD_HUMAN Immunoglobulin delta heavy chain OS=Homo sapiens OX=9606 PE=1 SV=1	3827	20210911_zy_plasma_ethcd_2.3494.3494.3	controllerType=0 controllerNumber=1 scan=3494	15.7983
00977:3	3	K.TKPREEQYN[+1444.534]STYR.V	HexNAc(4)Hex(3)Fuc(1)	N[+1445]	1039.45	3	3116.33	3116.34	0	-2.7	291	Specific	265.74	49.28	49.28	5.83	53	>sp|P0DOX5|IGG1_HUMAN Immunoglobulin gamma-1 heavy chain OS=Homo sapiens OX=9606 PE=1 SV=2	10252	20210911_zy_plasma_ethcd_2.1083.1083.3	controllerType=0 controllerNumber=1 scan=1083	5.1286
13210:3	22	K.VC[+57.021]QDC[+57.021]PLLAPLN[+2204.772]DTR.V	HexNAc(4)Hex(5)NeuAc(2)	C[+57]*2, N[+2205]	1326.21	3	3976.61	3976.62	0	-1.2	145	Specific	266.72	136.17	136.17	5.67	8	>sp|P02765|FETUA_HUMAN Alpha-2-HS-glycoprotein OS=Homo sapiens OX=9606 GN=AHSG PE=1 SV=2	4627	20210911_zy_plasma_ethcd_2.14488.14488.3	controllerType=0 controllerNumber=1 scan=14488	65.073
02755:3	8	R.EN[+3663.286]GTISR.Y	HexNAc(6)Hex(7)Fuc(1)NeuAc(4)	N[+3663]	1480.56	3	4439.66	4439.68	0	-2.5	102	Specific	266.91	31.06	31.06	4.28	30	>sp|P02763|A1AG1_HUMAN Alpha-1-acid glycoprotein 1 OS=Homo sapiens OX=9606 GN=ORM1 PE=1 SV=1	2208	20210911_zy_plasma_ethcd_2.3029.3029.3	controllerType=0 controllerNumber=1 scan=3029	13.7341
12217:3	6	R.GTAGNALMDGASQLMGEN[+1913.677]R.T	HexNAc(4)Hex(5)NeuAc(1)	N[+1914]	1269.51	3	3806.53	3806.54	0	-2.2	377	Specific	267.07	147.74	98.49	6.42	33	>sp|P02675|FIBB_HUMAN Fibrinogen beta chain OS=Homo sapiens OX=9606 GN=FGB PE=1 SV=2	6006	20210911_zy_plasma_ethcd_2.13401.13401.3	controllerType=0 controllerNumber=1 scan=13401	60.256
05248:3	15	K.LGN[+1913.677]WSAMPSC[+57.021]K.A	HexNAc(4)Hex(5)NeuAc(1)	C[+57], N[+1914]	1055.42	3	3164.23	3164.24	0	-3	251	Specific	267.53	150.36	150.36	5.6	19	>sp|P02749|APOH_HUMAN Beta-2-glycoprotein 1 OS=Homo sapiens OX=9606 GN=APOH PE=1 SV=3	19971	20210911_zy_plasma_ethcd_2.5760.5760.3	controllerType=0 controllerNumber=1 scan=5760	25.9136
10361:3	6	R.GTAGNALM[+15.995]DGASQLMGEN[+2204.772]R.T	HexNAc(4)Hex(5)NeuAc(2)	M[+16], N[+2205]	1371.88	3	4113.61	4113.63	0	-3.5	377	Specific	267.64	162.24	134.78	6.25	33	>sp|P02675|FIBB_HUMAN Fibrinogen beta chain OS=Homo sapiens OX=9606 GN=FGB PE=1 SV=2	6006	20210911_zy_plasma_ethcd_2.11363.11363.3	controllerType=0 controllerNumber=1 scan=11363	51.0026
01675:3	16	K.TKPREEQFN[+2059.735]STYR.V	HexNAc(4)Hex(5)Fuc(1)NeuAc(1)	N[+2060]	1239.18	3	3715.54	3715.55	0	-2.4	169	Specific	268.01	49.36	49.36	5.38	24	>sp|P01861|IGHG4_HUMAN Immunoglobulin heavy constant gamma 4 OS=Homo sapiens OX=9606 GN=IGHG4 PE=1 SV=1	12793	20210911_zy_plasma_ethcd_2.1848.1848.3	controllerType=0 controllerNumber=1 scan=1848	8.5297
09395:4	1	K.NLFLN[+3007.058]HSEN[+2861.000]ATAK.D	HexNAc(5)Hex(6)Fuc(1)NeuAc(3),HexNAc(5)Hex(6)NeuAc(3)	N[+2861][+3007]	1832.45	4	7326.78	7326.79	0	-1.6	203	Specific	268.12	142.45	0	5.79	151	>sp|P00738|HPT_HUMAN Haptoglobin OS=Homo sapiens OX=9606 GN=HP PE=1 SV=1	3044	20210911_zy_plasma_ethcd_2.10304.10304.4	controllerType=0 controllerNumber=1 scan=10304	46.2117
03964:4	1	K.NLFLN[+3081.095]HSEN[+1548.545]ATAK.D	HexNAc(6)Hex(7)Fuc(1)NeuAc(2),HexNAc(3)Hex(4)NeuAc(1)	N[+1549][+3081]	1522.84	4	6088.36	6088.37	0	-2.7	203	Specific	268.2	268.2	5.17	6.03	151	>sp|P00738|HPT_HUMAN Haptoglobin OS=Homo sapiens OX=9606 GN=HP PE=1 SV=1	3044	20210911_zy_plasma_ethcd_2.4354.4354.4	controllerType=0 controllerNumber=1 scan=4354	19.6626
05954:3	12	K.SPDVIN[+2204.772]GSPISQK.I	HexNAc(4)Hex(5)NeuAc(2)	N[+2205]	1182.83	3	3546.47	3546.47	0	-1.9	212	Specific	268.48	82.76	82.76	6	17	>sp|P08603|CFAH_HUMAN Complement factor H OS=Homo sapiens OX=9606 GN=CFH PE=1 SV=4	385	20210911_zy_plasma_ethcd_2.6533.6533.3	controllerType=0 controllerNumber=1 scan=6533	29.3345
03330:3	12	K.IPC[+57.021]SQPPQIEHGTIN[+1913.677]SSR.S	HexNAc(4)Hex(5)NeuAc(1)	C[+57], N[+1914]	1312.22	3	3934.65	3934.66	0	-4.7	868	Specific	268.72	108.78	108.78	5.79	17	>sp|P08603|CFAH_HUMAN Complement factor H OS=Homo sapiens OX=9606 GN=CFH PE=1 SV=4	385	20210911_zy_plasma_ethcd_2.3659.3659.3	controllerType=0 controllerNumber=1 scan=3659	16.5393
09797:3	30	R.ADGTVNQIEGEATPVN[+2059.735]LTEPAK.L	HexNAc(4)Hex(5)Fuc(1)NeuAc(1)	N[+2060]	1438.62	3	4313.85	4313.85	0	-0.7	83	Specific	269.06	134.72	134.72	6.17	6	>sp|P05090|APOD_HUMAN Apolipoprotein D OS=Homo sapiens OX=9606 GN=APOD PE=1 SV=1	120	20210911_zy_plasma_ethcd_2.10744.10744.5	controllerType=0 controllerNumber=1 scan=10744	48.1867
03252:3	39	R.DTFVN[+2204.772]ASR.T	HexNAc(4)Hex(5)NeuAc(2)	N[+2205]	1038.74	3	3114.21	3114.21	0	-2.3	234	Specific	269.15	66.64	66.64	4.9	8	>sp|P05155|IC1_HUMAN Plasma protease C1 inhibitor OS=Homo sapiens OX=9606 GN=SERPING1 PE=1 SV=2	9291	20210911_zy_plasma_ethcd_2.3574.3574.3	controllerType=0 controllerNumber=1 scan=3574	16.1553
04846:3	41	K.LHINHNN[+2424.867]LTESVGPLPK.S	HexNAc(5)Hex(6)Fuc(1)NeuAc(1)	N[+2425]	1436.63	3	4307.87	4307.88	0	-2.7	121	Specific	269.34	149.65	149.65	6.68	3	>sp|P51884|LUM_HUMAN Lumican OS=Homo sapiens OX=9606 GN=LUM PE=1 SV=2	17011	20210911_zy_plasma_ethcd_2.5320.5320.3	controllerType=0 controllerNumber=1 scan=5320	23.951
13419:3	21	K.N[+3007.058]GSLFAFR.G	HexNAc(5)Hex(6)Fuc(1)NeuAc(3)	N[+3007]	1306.85	3	3918.52	3918.53	0	-1.6	169	Specific	269.6	102.69	102.69	4.62	10	>sp|P04004|VTNC_HUMAN Vitronectin OS=Homo sapiens OX=9606 GN=VTN PE=1 SV=1	17960	20210911_zy_plasma_ethcd_2.14718.14718.3	controllerType=0 controllerNumber=1 scan=14718	66.0739
01873:3	3	R.EEQYN[+1751.624]STYR.V	HexNAc(4)Hex(4)NeuAc(1)	N[+1752]	981.047	3	2941.13	2941.14	0	-3.3	295	Specific	270.24	76.27	76.27	5.53	53	>sp|P0DOX5|IGG1_HUMAN Immunoglobulin gamma-1 heavy chain OS=Homo sapiens OX=9606 PE=1 SV=2	10252	20210911_zy_plasma_ethcd_2.2064.2064.3	controllerType=0 controllerNumber=1 scan=2064	9.4676
03137:3	53	R.N[+2350.830]YTLTGR.D	HexNAc(4)Hex(5)Fuc(1)NeuAc(2)	N[+2351]	1059.09	3	3175.25	3175.26	0	-2.4	754	Specific	270.75	98.16	98.16	4.89	5	>sp|P10643|CO7_HUMAN Complement component C7 OS=Homo sapiens OX=9606 GN=C7 PE=1 SV=2	4350	20210911_zy_plasma_ethcd_2.3448.3448.3	controllerType=0 controllerNumber=1 scan=3448	15.5941
09362:3	6	R.GTAGNALMDGASQLM[+15.995]GEN[+2204.772]R.T	HexNAc(4)Hex(5)NeuAc(2)	M[+16], N[+2205]	1371.88	3	4113.61	4113.63	0	-2.7	377	Specific	273	161.7	143.02	6.44	33	>sp|P02675|FIBB_HUMAN Fibrinogen beta chain OS=Homo sapiens OX=9606 GN=FGB PE=1 SV=2	6006	20210911_zy_plasma_ethcd_2.10268.10268.3	controllerType=0 controllerNumber=1 scan=10268	46.0544
02132:3	8	R.EN[+2861.000]GTISR.Y	HexNAc(5)Hex(6)NeuAc(3)	N[+2861]	1213.13	3	3637.38	3637.39	0	-1.9	102	Specific	273.3	29.24	29.24	4.26	30	>sp|P02763|A1AG1_HUMAN Alpha-1-acid glycoprotein 1 OS=Homo sapiens OX=9606 GN=ORM1 PE=1 SV=1	2208	20210911_zy_plasma_ethcd_2.2347.2347.3	controllerType=0 controllerNumber=1 scan=2347	10.6793
01783:3	4	K.TKPREEQFN[+1444.534]STFR.V	HexNAc(4)Hex(3)Fuc(1)	N[+1445]	1028.79	3	3084.34	3084.35	0	-2.8	168	Specific	273.47	148.31	148.31	6.11	36	>sp|P01859|IGHG2_HUMAN Immunoglobulin heavy constant gamma 2 OS=Homo sapiens OX=9606 GN=IGHG2 PE=1 SV=2	2858	20210911_zy_plasma_ethcd_2.1966.1966.3	controllerType=0 controllerNumber=1 scan=1966	9.0466
02860:3	8	R.EN[+3517.228]GTISR.Y	HexNAc(6)Hex(7)NeuAc(4)	N[+3517]	1431.88	3	4293.61	4293.62	0	-1.1	102	Specific	274.58	31.48	31.48	3.89	30	>sp|P02763|A1AG1_HUMAN Alpha-1-acid glycoprotein 1 OS=Homo sapiens OX=9606 GN=ORM1 PE=1 SV=1	2208	20210911_zy_plasma_ethcd_2.3145.3145.3	controllerType=0 controllerNumber=1 scan=3145	14.2483
01587:3	3	R.EEQYN[+1971.719]STYR.V	HexNAc(5)Hex(5)Fuc(1)	N[+1972]	1054.41	3	3161.22	3161.23	0	-3.3	295	Specific	274.6	135.87	135.87	5.55	53	>sp|P0DOX5|IGG1_HUMAN Immunoglobulin gamma-1 heavy chain OS=Homo sapiens OX=9606 PE=1 SV=2	10252	20210911_zy_plasma_ethcd_2.1752.1752.3	controllerType=0 controllerNumber=1 scan=1752	8.1194
07286:4	1	K.NLFLN[+3226.132]HSEN[+2204.772]ATAK.D	HexNAc(6)Hex(7)NeuAc(3),HexNAc(4)Hex(5)NeuAc(2)	N[+2205][+3226]	1722.91	4	6888.63	6889.64	-1	-0.7	203	Specific	274.66	148.68	17	5.7	151	>sp|P00738|HPT_HUMAN Haptoglobin OS=Homo sapiens OX=9606 GN=HP PE=1 SV=1	3044	20210911_zy_plasma_ethcd_2.7991.7991.4	controllerType=0 controllerNumber=1 scan=7991	35.7867
04854:3	4	R.EEQFN[+2350.830]STFR.V	HexNAc(4)Hex(5)Fuc(1)NeuAc(2)	N[+2351]	1170.12	3	3508.35	3508.35	0	-1.7	172	Specific	274.77	97.87	97.87	5.39	36	>sp|P01859|IGHG2_HUMAN Immunoglobulin heavy constant gamma 2 OS=Homo sapiens OX=9606 GN=IGHG2 PE=1 SV=2	2858	20210911_zy_plasma_ethcd_2.5329.5329.3	controllerType=0 controllerNumber=1 scan=5329	23.9928
01983:3	8	R.NEEYN[+2861.000]K.S	HexNAc(5)Hex(6)NeuAc(3)	N[+2861]	1219.78	3	3657.34	3657.35	0	-2.7	52	Specific	274.96	83.99	83.99	4.91	30	>sp|P02763|A1AG1_HUMAN Alpha-1-acid glycoprotein 1 OS=Homo sapiens OX=9606 GN=ORM1 PE=1 SV=1	2208	20210911_zy_plasma_ethcd_2.2184.2184.3	controllerType=0 controllerNumber=1 scan=2184	9.9821
04300:3	15	K.LGN[+2204.772]WSAM[+15.995]PSC[+57.021]K.A	HexNAc(4)Hex(5)NeuAc(2)	C[+57], M[+16], N[+2205]	1157.78	3	3471.32	3471.33	0	-2.3	251	Specific	275.2	158.61	158.61	5.76	19	>sp|P02749|APOH_HUMAN Beta-2-glycoprotein 1 OS=Homo sapiens OX=9606 GN=APOH PE=1 SV=3	19971	20210911_zy_plasma_ethcd_2.4722.4722.3	controllerType=0 controllerNumber=1 scan=4722	21.2803
03804:3	1	K.NLFLNHSEN[+2204.772]ATAK.D	HexNAc(4)Hex(5)NeuAc(2)	N[+2205]	1221.84	3	3663.49	3663.51	0	-3.5	203	Specific	275.3	101.69	84.46	5.89	151	>sp|P00738|HPT_HUMAN Haptoglobin OS=Homo sapiens OX=9606 GN=HP PE=1 SV=1	3044	20210911_zy_plasma_ethcd_2.4179.4179.3	controllerType=0 controllerNumber=1 scan=4179	18.8782
03478:3	4	R.EEQFN[+1897.682]STFR.V	HexNAc(4)Hex(4)Fuc(1)NeuAc(1)	N[+1898]	1019.07	3	3055.2	3055.2	0	-2.8	172	Specific	275.53	120	120	5.71	36	>sp|P01859|IGHG2_HUMAN Immunoglobulin heavy constant gamma 2 OS=Homo sapiens OX=9606 GN=IGHG2 PE=1 SV=2	2858	20210911_zy_plasma_ethcd_2.3822.3822.3	controllerType=0 controllerNumber=1 scan=3822	17.2754
13245:3	1	K.VVLHPN[+2715.963]YSQVDIGLIK.L	HexNAc(5)Hex(6)Fuc(1)NeuAc(2)	N[+2716]	1504.33	3	4510.97	4510.97	0	-1.4	236	Specific	275.57	193.35	193.35	6.14	151	>sp|P00738|HPT_HUMAN Haptoglobin OS=Homo sapiens OX=9606 GN=HP PE=1 SV=1	3044	20210911_zy_plasma_ethcd_2.14526.14526.3	controllerType=0 controllerNumber=1 scan=14526	65.2373
13317:3	1	K.VVLHPN[+2204.772]YSQVDIGLIK.L	HexNAc(4)Hex(5)NeuAc(2)	N[+2205]	1333.93	3	3999.78	3999.78	0	-1.9	236	Specific	275.84	137.74	137.74	6.35	151	>sp|P00738|HPT_HUMAN Haptoglobin OS=Homo sapiens OX=9606 GN=HP PE=1 SV=1	3044	20210911_zy_plasma_ethcd_2.14606.14606.4	controllerType=0 controllerNumber=1 scan=14606	65.5822
01609:3	3	K.PREEQYN[+2059.735]STYR.V	HexNAc(4)Hex(5)Fuc(1)NeuAc(1)	N[+2060]	1168.14	3	3502.39	3502.4	0	-2.4	293	Specific	276.38	54.89	54.89	5.45	53	>sp|P0DOX5|IGG1_HUMAN Immunoglobulin gamma-1 heavy chain OS=Homo sapiens OX=9606 PE=1 SV=2	10252	20210911_zy_plasma_ethcd_2.1776.1776.3	controllerType=0 controllerNumber=1 scan=1776	8.2224
12650:4	8	R.QDQC[+57.021]IYN[+2861.000]TTYLNVQR.E	HexNAc(5)Hex(6)NeuAc(3)	C[+57], N[+2861]	1194.98	4	4776.89	4776.9	0	-1.7	87	Specific	276.61	178.05	178.05	6.2	30	>sp|P02763|A1AG1_HUMAN Alpha-1-acid glycoprotein 1 OS=Homo sapiens OX=9606 GN=ORM1 PE=1 SV=1	2208	20210911_zy_plasma_ethcd_2.13874.13874.4	controllerType=0 controllerNumber=1 scan=13874	62.3483
01315:3	3	K.PREEQYN[+1768.640]STYR.V	HexNAc(4)Hex(5)Fuc(1)	N[+1769]	1071.1	3	3211.29	3211.31	0	-4.3	293	Specific	276.83	57.74	57.74	4.87	53	>sp|P0DOX5|IGG1_HUMAN Immunoglobulin gamma-1 heavy chain OS=Homo sapiens OX=9606 PE=1 SV=2	10252	20210911_zy_plasma_ethcd_2.1454.1454.3	controllerType=0 controllerNumber=1 scan=1454	6.8106
02515:3	38	K.MFSQN[+2204.772]DTR.C	HexNAc(4)Hex(5)NeuAc(2)	N[+2205]	1068.41	3	3203.2	3203.21	0	-2.4	321	Specific	277.22	107.93	107.93	4.91	5	>sp|P02750|A2GL_HUMAN Leucine-rich alpha-2-glycoprotein OS=Homo sapiens OX=9606 GN=LRG1 PE=1 SV=2	1095	20210911_zy_plasma_ethcd_2.2767.2767.3	controllerType=0 controllerNumber=1 scan=2767	12.5738
03214:3	53	R.N[+2350.830]YTLTGR.D	HexNAc(4)Hex(5)Fuc(1)NeuAc(2)	N[+2351]	1059.09	3	3175.25	3175.26	0	-2.5	754	Specific	277.26	100.4	100.4	4.91	5	>sp|P10643|CO7_HUMAN Complement component C7 OS=Homo sapiens OX=9606 GN=C7 PE=1 SV=2	4350	20210911_zy_plasma_ethcd_2.3532.3532.3	controllerType=0 controllerNumber=1 scan=3532	15.9696
02756:3	8	R.EN[+3663.286]GTISR.Y	HexNAc(6)Hex(7)Fuc(1)NeuAc(4)	N[+3663]	1480.56	3	4439.66	4439.68	0	-2.6	102	Specific	277.28	31.54	31.54	4.28	30	>sp|P02763|A1AG1_HUMAN Alpha-1-acid glycoprotein 1 OS=Homo sapiens OX=9606 GN=ORM1 PE=1 SV=1	2208	20210911_zy_plasma_ethcd_2.3031.3031.3	controllerType=0 controllerNumber=1 scan=3031	13.7401
06102:3	20	R.EN[+2204.772]ISDPTSPLR.T	HexNAc(4)Hex(5)NeuAc(2)	N[+2205]	1145.13	3	3433.38	3433.39	0	-2.9	70	Specific	277.83	117.6	117.6	5.71	13	>sp|P01591|IGJ_HUMAN Immunoglobulin J chain OS=Homo sapiens OX=9606 GN=JCHAIN PE=1 SV=4	4401	20210911_zy_plasma_ethcd_2.6695.6695.3	controllerType=0 controllerNumber=1 scan=6695	30.0536
01058:3	2	K.N[+1872.651]NSDISSTR.G	HexNAc(3)Hex(6)NeuAc(1)	N[+1873]	956.039	3	2866.1	2866.11	0	-2.3	46	Specific	277.91	126.81	126.81	5.71	56	>sp|P01871|IGHM_HUMAN Immunoglobulin heavy constant mu OS=Homo sapiens OX=9606 GN=IGHM PE=1 SV=4	10127	20210911_zy_plasma_ethcd_2.1172.1172.3	controllerType=0 controllerNumber=1 scan=1172	5.5331
05760:4	1	K.NLFLN[+2861.000]HSEN[+1548.545]ATAK.D	HexNAc(5)Hex(6)NeuAc(3),HexNAc(3)Hex(4)NeuAc(1)	N[+1549][+2861]	1467.57	4	5867.26	5868.28	-1	-1.8	203	Specific	278.06	141.44	4.6	6.03	151	>sp|P00738|HPT_HUMAN Haptoglobin OS=Homo sapiens OX=9606 GN=HP PE=1 SV=1	3044	20210911_zy_plasma_ethcd_2.6321.6321.4	controllerType=0 controllerNumber=1 scan=6321	28.3979
01088:3	3	K.TKPREEQYN[+1606.587]STYR.V	HexNAc(4)Hex(4)Fuc(1)	N[+1607]	1093.47	3	3278.39	3278.4	0	-2.4	291	Specific	278.27	50.2	50.2	5.81	53	>sp|P0DOX5|IGG1_HUMAN Immunoglobulin gamma-1 heavy chain OS=Homo sapiens OX=9606 PE=1 SV=2	10252	20210911_zy_plasma_ethcd_2.1205.1205.3	controllerType=0 controllerNumber=1 scan=1205	5.6815
01948:4	11	R.N[+2861.000]GTGHGN[+2204.772]STHHGPEYMR.C	HexNAc(5)Hex(6)NeuAc(3),HexNAc(4)Hex(5)NeuAc(2)	N[+2205][+2861]	1730.14	4	6917.55	6917.57	0	-3	240	Specific	279.33	180.01	6.57	6.49	25	>sp|P02790|HEMO_HUMAN Hemopexin OS=Homo sapiens OX=9606 GN=HPX PE=1 SV=2	9336	20210911_zy_plasma_ethcd_2.2146.2146.4	controllerType=0 controllerNumber=1 scan=2146	9.8225
12621:3	13	K.C[+57.021]GLVPVLAENYN[+2350.830]K.S	HexNAc(4)Hex(5)Fuc(1)NeuAc(2)	C[+57], N[+2351]	1276.53	3	3827.57	3827.58	0	-2.3	421	Specific	279.57	156.45	156.45	6.08	17	>sp|TRFE_HUMAN|(Common contaminant protein)	20484	20210911_zy_plasma_ethcd_2.13843.13843.3	controllerType=0 controllerNumber=1 scan=13843	62.2097
02382:3	14	R.EN[+3663.286]GTVSR.Y	HexNAc(6)Hex(7)Fuc(1)NeuAc(4)	N[+3663]	1475.89	3	4425.65	4425.66	0	-1.2	102	Specific	279.76	87.9	87.9	4.62	18	>sp|P19652|A1AG2_HUMAN Alpha-1-acid glycoprotein 2 OS=Homo sapiens OX=9606 GN=ORM2 PE=1 SV=2	4531	20210911_zy_plasma_ethcd_2.2621.2621.3	controllerType=0 controllerNumber=1 scan=2621	11.9172
01435:3	8	R.NEEYN[+2569.905]K.S	HexNAc(5)Hex(6)NeuAc(2)	N[+2570]	1122.75	3	3366.24	3366.25	0	-2.2	52	Specific	279.81	85.87	85.87	4.89	30	>sp|P02763|A1AG1_HUMAN Alpha-1-acid glycoprotein 1 OS=Homo sapiens OX=9606 GN=ORM1 PE=1 SV=1	2208	20210911_zy_plasma_ethcd_2.1586.1586.3	controllerType=0 controllerNumber=1 scan=1586	7.406
10345:3	20	R.IIVPLNNREN[+2059.735]ISDPTSPLR.T	HexNAc(4)Hex(5)Fuc(1)NeuAc(1)	N[+2060]	1403.31	3	4207.91	4207.91	0	-1	62	Specific	280.27	164.44	164.44	5.22	13	>sp|P01591|IGJ_HUMAN Immunoglobulin J chain OS=Homo sapiens OX=9606 GN=JCHAIN PE=1 SV=4	4401	20210911_zy_plasma_ethcd_2.11346.11346.3	controllerType=0 controllerNumber=1 scan=11346	50.9269
02992:3	15	R.VYKPSAGN[+2569.905]NSLYR.D	HexNAc(5)Hex(6)NeuAc(2)	N[+2570]	1346.89	3	4038.65	4038.66	0	-2.4	155	Specific	280.51	117.44	117.44	6.05	19	>sp|P02749|APOH_HUMAN Beta-2-glycoprotein 1 OS=Homo sapiens OX=9606 GN=APOH PE=1 SV=3	19971	20210911_zy_plasma_ethcd_2.3289.3289.3	controllerType=0 controllerNumber=1 scan=3289	14.8887
03169:3	39	R.DTFVN[+2350.830]ASR.T	HexNAc(4)Hex(5)Fuc(1)NeuAc(2)	N[+2351]	1087.43	3	3260.26	3260.27	0	-2.8	234	Specific	281.21	81.08	81.08	4.4	8	>sp|P05155|IC1_HUMAN Plasma protease C1 inhibitor OS=Homo sapiens OX=9606 GN=SERPING1 PE=1 SV=2	9291	20210911_zy_plasma_ethcd_2.3483.3483.3	controllerType=0 controllerNumber=1 scan=3483	15.7515
12313:3	13	K.C[+57.021]GLVPVLAENYN[+2569.905]K.S	HexNAc(5)Hex(6)NeuAc(2)	C[+57], N[+2570]	1349.56	3	4046.65	4046.66	0	-1.2	421	Specific	281.27	140.72	140.72	5.71	17	>sp|TRFE_HUMAN|(Common contaminant protein)	20484	20210911_zy_plasma_ethcd_2.13506.13506.3	controllerType=0 controllerNumber=1 scan=13506	60.7272
02378:3	5	K.TPLTAN[+1971.719]ITK.S	HexNAc(5)Hex(5)Fuc(1)	N[+1972]	977.428	3	2930.27	2930.28	0	-1.9	200	Specific	282.13	151.64	151.64	5.73	33	>sp|P01877|IGHA2_HUMAN Immunoglobulin heavy constant alpha 2 OS=Homo sapiens OX=9606 GN=IGHA2 PE=1 SV=4	10403	20210911_zy_plasma_ethcd_2.2617.2617.3	controllerType=0 controllerNumber=1 scan=2617	11.8984
12633:3	13	K.C[+57.021]GLVPVLAENYN[+2204.772]K.S	HexNAc(4)Hex(5)NeuAc(2)	C[+57], N[+2205]	1227.84	3	3681.51	3681.52	0	-2.4	421	Specific	282.17	121.99	121.99	6.01	17	>sp|TRFE_HUMAN|(Common contaminant protein)	20484	20210911_zy_plasma_ethcd_2.13856.13856.3	controllerType=0 controllerNumber=1 scan=13856	62.2674
07150:4	1	K.NLFLN[+3226.132]HSEN[+2204.772]ATAK.D	HexNAc(6)Hex(7)NeuAc(3),HexNAc(4)Hex(5)NeuAc(2)	N[+2205][+3226]	1722.91	4	6888.63	6889.64	-1	-1	203	Specific	283.21	144.04	14.9	5.67	151	>sp|P00738|HPT_HUMAN Haptoglobin OS=Homo sapiens OX=9606 GN=HP PE=1 SV=1	3044	20210911_zy_plasma_ethcd_2.7842.7842.4	controllerType=0 controllerNumber=1 scan=7842	35.1235
05984:3	6	K.YRGTAGNALMDGASQLM[+15.995]GEN[+1913.677]R.T	HexNAc(4)Hex(5)NeuAc(1)	M[+16], N[+1914]	1381.23	3	4141.69	4141.7	0	-1.8	375	Specific	283.25	208.58	76.52	6.77	33	>sp|P02675|FIBB_HUMAN Fibrinogen beta chain OS=Homo sapiens OX=9606 GN=FGB PE=1 SV=2	6006	20210911_zy_plasma_ethcd_2.6566.6566.3	controllerType=0 controllerNumber=1 scan=6566	29.4814
06465:3	11	R.SWPAVGN[+1913.677]C[+57.021]SSALR.W	HexNAc(4)Hex(5)NeuAc(1)	C[+57], N[+1914]	1106.78	3	3318.34	3318.35	0	-2.6	181	Specific	283.28	103.65	103.65	6	25	>sp|P02790|HEMO_HUMAN Hemopexin OS=Homo sapiens OX=9606 GN=HPX PE=1 SV=2	9336	20210911_zy_plasma_ethcd_2.7092.7092.3	controllerType=0 controllerNumber=1 scan=7092	31.7928
10663:3	2	R.GLTFQQN[+2262.814]ASSMC[+57.021]VPDQDTAIR.V	HexNAc(5)Hex(5)Fuc(1)NeuAc(1)	C[+57], N[+2263]	1534.63	3	4601.89	4601.89	0	-0.5	203	Specific	283.35	184.81	39.87	5.98	56	>sp|P01871|IGHM_HUMAN Immunoglobulin heavy constant mu OS=Homo sapiens OX=9606 GN=IGHM PE=1 SV=4	10127	20210911_zy_plasma_ethcd_2.11694.11694.3	controllerType=0 controllerNumber=1 scan=11694	52.4894
01693:4	19	K.KKEDALN[+2861.000]ETR.E	HexNAc(5)Hex(6)NeuAc(3)	N[+2861]	1016.91	4	4064.62	4064.63	0	-3.7	80	Specific	283.35	132.92	132.92	5.59	15	>sp|P10909|CLUS_HUMAN Clusterin OS=Homo sapiens OX=9606 GN=CLU PE=1 SV=1	6125	20210911_zy_plasma_ethcd_2.1867.1867.4	controllerType=0 controllerNumber=1 scan=1867	8.613
03023:3	8	R.EN[+3517.228]GTISR.Y	HexNAc(6)Hex(7)NeuAc(4)	N[+3517]	1431.87	3	4293.61	4293.62	0	-2.1	102	Specific	283.36	32.84	32.84	4.24	30	>sp|P02763|A1AG1_HUMAN Alpha-1-acid glycoprotein 1 OS=Homo sapiens OX=9606 GN=ORM1 PE=1 SV=1	2208	20210911_zy_plasma_ethcd_2.3323.3323.3	controllerType=0 controllerNumber=1 scan=3323	15.0419
13221:3	1	K.VVLHPN[+2715.963]YSQVDIGLIK.L	HexNAc(5)Hex(6)Fuc(1)NeuAc(2)	N[+2716]	1503.99	3	4509.96	4510.97	-1	-2.4	236	Specific	284.2	159.43	159.43	6.62	151	>sp|P00738|HPT_HUMAN Haptoglobin OS=Homo sapiens OX=9606 GN=HP PE=1 SV=1	3044	20210911_zy_plasma_ethcd_2.14500.14500.3	controllerType=0 controllerNumber=1 scan=14500	65.125
11072:3	11	R.SWPAVGN[+2861.000]C[+57.021]SSALR.W	HexNAc(5)Hex(6)NeuAc(3)	C[+57], N[+2861]	1422.56	3	4265.67	4265.67	0	-0.9	181	Specific	284.42	85.66	85.66	5.35	25	>sp|P02790|HEMO_HUMAN Hemopexin OS=Homo sapiens OX=9606 GN=HPX PE=1 SV=2	9336	20210911_zy_plasma_ethcd_2.12143.12143.3	controllerType=0 controllerNumber=1 scan=12143	54.5155
05558:4	1	K.NLFLN[+2921.058]HSEN[+2026.687]ATAK.D	HexNAc(8)Hex(8),HexNAc(2)Hex(10)	N[+2027][+2921]	1602.62	4	6407.45	6406.48	1	-4.2	203	Specific	284.62	139.53	18.4	5.4	151	>sp|P00738|HPT_HUMAN Haptoglobin OS=Homo sapiens OX=9606 GN=HP PE=1 SV=1	3044	20210911_zy_plasma_ethcd_2.6100.6100.4	controllerType=0 controllerNumber=1 scan=6100	27.4227
13738:3	7	K.AGLQAFFQVQEC[+57.021]N[+2350.830]K.S	HexNAc(4)Hex(5)Fuc(1)NeuAc(2)	C[+57], N[+2351]	1330.88	3	3990.61	3990.62	0	-2.3	346	Specific	284.92	169.6	169.6	6.05	24	>sp|P00450|CERU_HUMAN Ceruloplasmin OS=Homo sapiens OX=9606 GN=CP PE=1 SV=1	460	20210911_zy_plasma_ethcd_2.15067.15067.3	controllerType=0 controllerNumber=1 scan=15067	67.6401
01755:3	4	K.TKPREEQFN[+1403.507]STFR.V	HexNAc(3)Hex(4)Fuc(1)	N[+1404]	1015.11	3	3043.32	3043.33	0	-1.8	168	Specific	285.29	164.41	164.41	5.81	36	>sp|P01859|IGHG2_HUMAN Immunoglobulin heavy constant gamma 2 OS=Homo sapiens OX=9606 GN=IGHG2 PE=1 SV=2	2858	20210911_zy_plasma_ethcd_2.1935.1935.3	controllerType=0 controllerNumber=1 scan=1935	8.9128
13765:3	28	K.N[+2350.830]LSMPLLPADFHK.E	HexNAc(4)Hex(5)Fuc(1)NeuAc(2)	N[+2351]	1278.54	3	3833.59	3833.61	0	-3.5	49	Specific	285.35	161	161	5.94	9	>sp|P05546|HEP2_HUMAN Heparin cofactor 2 OS=Homo sapiens OX=9606 GN=SERPIND1 PE=1 SV=3	4741	20210911_zy_plasma_ethcd_2.15097.15097.3	controllerType=0 controllerNumber=1 scan=15097	67.7712
13985:3	1	K.VVLHPN[+3226.132]YSQVDIGLIK.L	HexNAc(6)Hex(7)NeuAc(3)	N[+3226]	1674.38	3	5021.14	5021.14	0	-1.6	236	Specific	285.35	90.71	90.71	5.99	151	>sp|P00738|HPT_HUMAN Haptoglobin OS=Homo sapiens OX=9606 GN=HP PE=1 SV=1	3044	20210911_zy_plasma_ethcd_2.15337.15337.3	controllerType=0 controllerNumber=1 scan=15337	68.8122
09575:3	13	K.C[+57.021]GLVPVLAENYN[+2278.809]K.S	HexNAc(5)Hex(6)NeuAc(1)	C[+57], N[+2279]	1252.52	3	3755.55	3755.56	0	-2.5	421	Specific	285.79	174.09	174.09	6.07	17	>sp|TRFE_HUMAN|(Common contaminant protein)	20484	20210911_zy_plasma_ethcd_2.10501.10501.3	controllerType=0 controllerNumber=1 scan=10501	47.0892
04513:3	20	R.EN[+2116.756]ISDPTSPLR.T	HexNAc(5)Hex(5)NeuAc(1)	N[+2117]	1115.79	3	3345.37	3345.37	0	-2.3	70	Specific	285.89	151.51	151.51	5.73	13	>sp|P01591|IGJ_HUMAN Immunoglobulin J chain OS=Homo sapiens OX=9606 GN=JCHAIN PE=1 SV=4	4401	20210911_zy_plasma_ethcd_2.4955.4955.3	controllerType=0 controllerNumber=1 scan=4955	22.3079
08822:3	32	K.DIVEYYNDSN[+2204.772]GSHVLQGR.F	HexNAc(4)Hex(5)NeuAc(2)	N[+2205]	1424.24	3	4270.72	4270.73	0	-2.3	103	Specific	285.94	128.75	62.27	6.42	6	>sp|P25311|ZA2G_HUMAN Zinc-alpha-2-glycoprotein OS=Homo sapiens OX=9606 GN=AZGP1 PE=1 SV=2	18783	20210911_zy_plasma_ethcd_2.9675.9675.3	controllerType=0 controllerNumber=1 scan=9675	43.3278
10690:3	21	K.N[+2204.772]GSLFAFR.G	HexNAc(4)Hex(5)NeuAc(2)	N[+2205]	1039.42	3	3116.24	3116.25	0	-2.5	169	Specific	286.24	130.59	130.59	4.91	10	>sp|P04004|VTNC_HUMAN Vitronectin OS=Homo sapiens OX=9606 GN=VTN PE=1 SV=1	17960	20210911_zy_plasma_ethcd_2.11724.11724.3	controllerType=0 controllerNumber=1 scan=11724	52.6249
12249:3	13	K.C[+57.021]GLVPVLAENYN[+2569.905]K.S	HexNAc(5)Hex(6)NeuAc(2)	C[+57], N[+2570]	1349.55	3	4046.65	4046.66	0	-1.9	421	Specific	286.4	145.85	145.85	6.05	17	>sp|TRFE_HUMAN|(Common contaminant protein)	20484	20210911_zy_plasma_ethcd_2.13436.13436.3	controllerType=0 controllerNumber=1 scan=13436	60.4164
02065:3	5	K.HYTN[+2262.814]SSQDVTVPC[+57.021]R.V	HexNAc(5)Hex(5)Fuc(1)NeuAc(1)	C[+57], N[+2263]	1309.52	3	3926.56	3926.56	0	-2.1	89	Specific	286.56	133.81	133.81	6.06	33	>sp|P01877|IGHA2_HUMAN Immunoglobulin heavy constant alpha 2 OS=Homo sapiens OX=9606 GN=IGHA2 PE=1 SV=4	10403	20210911_zy_plasma_ethcd_2.2274.2274.3	controllerType=0 controllerNumber=1 scan=2274	10.3649
14195:3	13	K.C[+57.021]GLVPVLAENYN[+2861.000]K.S	HexNAc(5)Hex(6)NeuAc(3)	C[+57], N[+2861]	1446.59	3	4337.75	4337.75	0	-0.9	421	Specific	286.78	167.57	167.57	5.44	17	>sp|TRFE_HUMAN|(Common contaminant protein)	20484	20210911_zy_plasma_ethcd_2.15568.15568.3	controllerType=0 controllerNumber=1 scan=15568	69.8199
01393:3	3	K.PREEQYN[+1809.666]STYR.V	HexNAc(5)Hex(4)Fuc(1)	N[+1810]	1084.78	3	3252.32	3252.33	0	-3.2	293	Specific	287.4	81.85	81.85	5.47	53	>sp|P0DOX5|IGG1_HUMAN Immunoglobulin gamma-1 heavy chain OS=Homo sapiens OX=9606 PE=1 SV=2	10252	20210911_zy_plasma_ethcd_2.1540.1540.3	controllerType=0 controllerNumber=1 scan=1540	7.2009
12671:3	8	R.QDQC[+57.021]IYN[+2569.905]TTYLNVQR.E	HexNAc(5)Hex(6)NeuAc(2)	C[+57], N[+2570]	1495.93	3	4485.78	4485.8	0	-5.6	87	Specific	287.64	184.56	184.56	6.02	30	>sp|P02763|A1AG1_HUMAN Alpha-1-acid glycoprotein 1 OS=Homo sapiens OX=9606 GN=ORM1 PE=1 SV=1	2208	20210911_zy_plasma_ethcd_2.13897.13897.3	controllerType=0 controllerNumber=1 scan=13897	62.4495
12040:4	14	R.QNQC[+57.021]FYN[+3372.190]SSYLNVQR.E	HexNAc(6)Hex(7)Fuc(1)NeuAc(3)	C[+57], N[+3372]	1324.01	4	5293.04	5293.06	0	-3.6	87	Specific	287.84	114.61	114.61	6.21	18	>sp|P19652|A1AG2_HUMAN Alpha-1-acid glycoprotein 2 OS=Homo sapiens OX=9606 GN=ORM2 PE=1 SV=2	4531	20210911_zy_plasma_ethcd_2.13207.13207.4	controllerType=0 controllerNumber=1 scan=13207	59.3796
12696:3	8	R.QDQC[+57.021]IYN[+3226.132]TTYLNVQR.E	HexNAc(6)Hex(7)NeuAc(3)	C[+57], N[+3226]	1714.68	3	5142.03	5142.03	0	0.1	87	Specific	288.65	149.83	149.83	5.17	30	>sp|P02763|A1AG1_HUMAN Alpha-1-acid glycoprotein 1 OS=Homo sapiens OX=9606 GN=ORM1 PE=1 SV=1	2208	20210911_zy_plasma_ethcd_2.13925.13925.3	controllerType=0 controllerNumber=1 scan=13925	62.5696
01988:3	16	K.PREEQFN[+1897.682]STYR.V	HexNAc(4)Hex(4)Fuc(1)NeuAc(1)	N[+1898]	1108.79	3	3324.35	3324.35	0	-1.5	171	Specific	288.82	73.72	73.72	5.36	24	>sp|P01861|IGHG4_HUMAN Immunoglobulin heavy constant gamma 4 OS=Homo sapiens OX=9606 GN=IGHG4 PE=1 SV=1	12793	20210911_zy_plasma_ethcd_2.2190.2190.3	controllerType=0 controllerNumber=1 scan=2190	10.0068
00832:2	2	K.N[+1768.640]NSDISSTR.G	HexNAc(4)Hex(5)Fuc(1)	N[+1769]	1381.55	2	2762.09	2762.1	0	-1.7	46	Specific	289.05	168.05	168.05	5.5	56	>sp|P01871|IGHM_HUMAN Immunoglobulin heavy constant mu OS=Homo sapiens OX=9606 GN=IGHM PE=1 SV=4	10127	20210911_zy_plasma_ethcd_2.924.924.2	controllerType=0 controllerNumber=1 scan=924	4.4027
03106:3	71	K.GINYN[+2204.772]SSVAK.S	HexNAc(4)Hex(5)NeuAc(2)	N[+2205]	1086.44	3	3257.3	3257.31	0	-1.8	122	Specific	289.34	118.13	118.13	3.77	1	>sp|P03951|FA11_HUMAN Coagulation factor XI OS=Homo sapiens OX=9606 GN=F11 PE=1 SV=1	4279	20210911_zy_plasma_ethcd_2.3414.3414.3	controllerType=0 controllerNumber=1 scan=3414	15.4433
06068:3	20	R.EN[+2350.830]ISDPTSPLR.T	HexNAc(4)Hex(5)Fuc(1)NeuAc(2)	N[+2351]	1193.82	3	3579.44	3579.45	0	-2.6	70	Specific	289.83	134.75	134.75	5.7	13	>sp|P01591|IGJ_HUMAN Immunoglobulin J chain OS=Homo sapiens OX=9606 GN=JCHAIN PE=1 SV=4	4401	20210911_zy_plasma_ethcd_2.6658.6658.3	controllerType=0 controllerNumber=1 scan=6658	29.8839
01363:3	3	K.PREEQYN[+1663.608]STYR.V	HexNAc(5)Hex(4)	N[+1664]	1036.09	3	3106.26	3106.27	0	-4.3	293	Specific	290.17	139.77	139.77	4.57	53	>sp|P0DOX5|IGG1_HUMAN Immunoglobulin gamma-1 heavy chain OS=Homo sapiens OX=9606 PE=1 SV=2	10252	20210911_zy_plasma_ethcd_2.1507.1507.3	controllerType=0 controllerNumber=1 scan=1507	7.0534
13694:4	8	R.QDQC[+57.021]IYN[+4028.418]TTYLNVQR.E	HexNAc(7)Hex(8)Fuc(1)NeuAc(4)	C[+57], N[+4028]	1486.83	4	5944.3	5944.31	0	-2.4	87	Specific	290.72	179.99	179.99	6.46	30	>sp|P02763|A1AG1_HUMAN Alpha-1-acid glycoprotein 1 OS=Homo sapiens OX=9606 GN=ORM1 PE=1 SV=1	2208	20210911_zy_plasma_ethcd_2.15019.15019.4	controllerType=0 controllerNumber=1 scan=15019	67.4237
02968:3	28	K.DFVN[+2204.772]ASSK.Y	HexNAc(4)Hex(5)NeuAc(2)	N[+2205]	1024.73	3	3072.19	3072.19	0	-2.5	185	Specific	290.83	58.19	58.19	4.68	9	>sp|P05546|HEP2_HUMAN Heparin cofactor 2 OS=Homo sapiens OX=9606 GN=SERPIND1 PE=1 SV=3	4741	20210911_zy_plasma_ethcd_2.3263.3263.3	controllerType=0 controllerNumber=1 scan=3263	14.7721
13212:3	1	K.VVLHPN[+2935.037]YSQVDIGLIK.L	HexNAc(6)Hex(7)NeuAc(2)	N[+2935]	1577.02	3	4729.04	4730.05	-1	-0.1	236	Specific	290.89	150.01	150.01	5.73	151	>sp|P00738|HPT_HUMAN Haptoglobin OS=Homo sapiens OX=9606 GN=HP PE=1 SV=1	3044	20210911_zy_plasma_ethcd_2.14490.14490.3	controllerType=0 controllerNumber=1 scan=14490	65.0826
01404:3	25	K.TKPREEQYN[+1444.534]STFR.V	HexNAc(4)Hex(3)Fuc(1)	N[+1445]	1034.12	3	3100.34	3100.35	0	-2.8	219	Specific	291.97	46.94	46.94	5.83	11	>sp|P01860|IGHG3_HUMAN Immunoglobulin heavy constant gamma 3 OS=Homo sapiens OX=9606 GN=IGHG3 PE=1 SV=2	2742	20210911_zy_plasma_ethcd_2.1552.1552.3	controllerType=0 controllerNumber=1 scan=1552	7.2518
01652:3	25	K.PREEQYN[+1768.640]STFR.V	HexNAc(4)Hex(5)Fuc(1)	N[+1769]	1065.77	3	3195.3	3195.31	0	-3.6	221	Specific	292.28	77.78	77.78	5.17	11	>sp|P01860|IGHG3_HUMAN Immunoglobulin heavy constant gamma 3 OS=Homo sapiens OX=9606 GN=IGHG3 PE=1 SV=2	2742	20210911_zy_plasma_ethcd_2.1823.1823.3	controllerType=0 controllerNumber=1 scan=1823	8.4263
09269:4	1	K.NLFLN[+3517.228]HSEN[+2204.772]ATAK.D	HexNAc(6)Hex(7)NeuAc(4),HexNAc(4)Hex(5)NeuAc(2)	N[+2205][+3517]	1795.69	4	7179.72	7180.73	-1	-1.5	203	Specific	292.53	159.85	8	6	151	>sp|P00738|HPT_HUMAN Haptoglobin OS=Homo sapiens OX=9606 GN=HP PE=1 SV=1	3044	20210911_zy_plasma_ethcd_2.10166.10166.4	controllerType=0 controllerNumber=1 scan=10166	45.603
03355:3	34	R.HEEGHMLN[+2204.772]C[+57.021]TC[+57.021]FGQGR.G	HexNAc(4)Hex(5)NeuAc(2)	C[+57]*2, N[+2205]	1379.86	3	4137.55	4137.56	0	-2.6	535	Specific	293.95	164.57	164.57	6.57	3	>sp|P02751|FINC_HUMAN Fibronectin OS=Homo sapiens OX=9606 GN=FN1 PE=1 SV=4	5465	20210911_zy_plasma_ethcd_2.3687.3687.3	controllerType=0 controllerNumber=1 scan=3687	16.6636
07162:4	1	K.NLFLN[+2878.015]HSEN[+2188.740]ATAK.D	HexNAc(5)Hex(7)Fuc(1)NeuAc(2),HexNAc(2)Hex(11)	N[+2189][+2878]	1631.88	4	6524.49	6525.49	-1	0.6	203	Specific	293.96	293.96	1.39	5.22	151	>sp|P00738|HPT_HUMAN Haptoglobin OS=Homo sapiens OX=9606 GN=HP PE=1 SV=1	3044	20210911_zy_plasma_ethcd_2.7855.7855.4	controllerType=0 controllerNumber=1 scan=7855	35.1822
13285:3	1	K.VVLHPN[+2221.788]YSQVDIGLIK.L	HexNAc(4)Hex(6)Fuc(1)NeuAc(1)	N[+2222]	1339.61	3	4016.8	4016.8	0	0.6	236	Specific	294.24	235.92	235.92	5.18	151	>sp|P00738|HPT_HUMAN Haptoglobin OS=Homo sapiens OX=9606 GN=HP PE=1 SV=1	3044	20210911_zy_plasma_ethcd_2.14571.14571.3	controllerType=0 controllerNumber=1 scan=14571	65.4258
12236:4	14	R.QNQC[+57.021]FYN[+2861.000]SSYLNVQR.E	HexNAc(5)Hex(6)NeuAc(3)	C[+57], N[+2861]	1196.22	4	4781.85	4781.87	0	-3.1	87	Specific	294.36	167.69	167.69	6.29	18	>sp|P19652|A1AG2_HUMAN Alpha-1-acid glycoprotein 2 OS=Homo sapiens OX=9606 GN=ORM2 PE=1 SV=2	4531	20210911_zy_plasma_ethcd_2.13421.13421.4	controllerType=0 controllerNumber=1 scan=13421	60.3501
04444:3	20	R.EN[+1913.677]ISDPTSPLR.T	HexNAc(4)Hex(5)NeuAc(1)	N[+1914]	1048.1	3	3142.29	3142.29	0	-2.3	70	Specific	294.43	143.15	143.15	5.73	13	>sp|P01591|IGJ_HUMAN Immunoglobulin J chain OS=Homo sapiens OX=9606 GN=JCHAIN PE=1 SV=4	4401	20210911_zy_plasma_ethcd_2.4879.4879.3	controllerType=0 controllerNumber=1 scan=4879	21.9707
09050:3	11	R.SWPAVGN[+2204.772]C[+57.021]SSALR.W	HexNAc(4)Hex(5)NeuAc(2)	C[+57], N[+2205]	1203.81	3	3609.43	3609.44	0	-3.8	181	Specific	295.26	123.63	123.63	5.93	25	>sp|P02790|HEMO_HUMAN Hemopexin OS=Homo sapiens OX=9606 GN=HPX PE=1 SV=2	9336	20210911_zy_plasma_ethcd_2.9926.9926.3	controllerType=0 controllerNumber=1 scan=9926	44.5054
04278:3	12	K.IPC[+57.021]SQPPQIEHGTIN[+2350.830]SSR.S	HexNAc(4)Hex(5)Fuc(1)NeuAc(2)	C[+57], N[+2351]	1457.6	3	4370.8	4371.82	-1	-4	868	Specific	295.29	187.72	49.09	6.63	17	>sp|P08603|CFAH_HUMAN Complement factor H OS=Homo sapiens OX=9606 GN=CFH PE=1 SV=4	385	20210911_zy_plasma_ethcd_2.4698.4698.3	controllerType=0 controllerNumber=1 scan=4698	21.1761
09864:3	13	K.C[+57.021]GLVPVLAENYN[+1913.677]K.S	HexNAc(4)Hex(5)NeuAc(1)	C[+57], N[+1914]	1130.81	3	3390.42	3390.43	0	-2.7	421	Specific	295.75	156.89	156.89	6.07	17	>sp|TRFE_HUMAN|(Common contaminant protein)	20484	20210911_zy_plasma_ethcd_2.10818.10818.3	controllerType=0 controllerNumber=1 scan=10818	48.5185
11336:3	7	K.EN[+1913.677]LTAPGSDSAVFFEQGTTR.I	HexNAc(4)Hex(5)NeuAc(1)	N[+1914]	1347.56	3	4040.66	4040.68	0	-2.9	396	Specific	296.06	168.34	168.34	6.84	24	>sp|P00450|CERU_HUMAN Ceruloplasmin OS=Homo sapiens OX=9606 GN=CP PE=1 SV=1	460	20210911_zy_plasma_ethcd_2.12433.12433.3	controllerType=0 controllerNumber=1 scan=12433	55.8345
02759:4	5	K.HYTN[+1971.719]SSQDVTVPC[+57.021]RVPPPPPC[+57.021]C[+57.021]HPR.L	HexNAc(5)Hex(5)Fuc(1)	C[+57]*3, N[+1972]	1233.27	4	4930.06	4930.07	0	-2.9	89	Specific	296.24	254.64	254.64	5.97	33	>sp|P01877|IGHA2_HUMAN Immunoglobulin heavy constant alpha 2 OS=Homo sapiens OX=9606 GN=IGHA2 PE=1 SV=4	10403	20210911_zy_plasma_ethcd_2.3034.3034.4	controllerType=0 controllerNumber=1 scan=3034	13.7552
01467:3	25	K.TKPREEQYN[+1809.666]STFR.V	HexNAc(5)Hex(4)Fuc(1)	N[+1810]	1155.83	3	3465.47	3465.48	0	-2.5	219	Specific	296.29	25.98	25.98	5.05	11	>sp|P01860|IGHG3_HUMAN Immunoglobulin heavy constant gamma 3 OS=Homo sapiens OX=9606 GN=IGHG3 PE=1 SV=2	2742	20210911_zy_plasma_ethcd_2.1621.1621.3	controllerType=0 controllerNumber=1 scan=1621	7.5631
04234:4	1	K.NLFLN[+1913.677]HSEN[+2204.772]ATAK.D	HexNAc(4)Hex(5)NeuAc(1),HexNAc(4)Hex(5)NeuAc(2)	N[+1914][+2205]	1395.05	4	5577.18	5577.18	0	-1.4	203	Specific	296.43	296.43	39.69	5.83	151	>sp|P00738|HPT_HUMAN Haptoglobin OS=Homo sapiens OX=9606 GN=HP PE=1 SV=1	3044	20210911_zy_plasma_ethcd_2.4650.4650.4	controllerType=0 controllerNumber=1 scan=4650	20.9616
09564:4	1	K.NLFLN[+3517.228]HSEN[+2204.772]ATAK.D	HexNAc(6)Hex(7)NeuAc(4),HexNAc(4)Hex(5)NeuAc(2)	N[+2205][+3517]	1795.69	4	7179.72	7180.73	-1	-1.2	203	Specific	296.52	161.16	8	6	151	>sp|P00738|HPT_HUMAN Haptoglobin OS=Homo sapiens OX=9606 GN=HP PE=1 SV=1	3044	20210911_zy_plasma_ethcd_2.10489.10489.4	controllerType=0 controllerNumber=1 scan=10489	47.0323
00926:3	3	K.TKPREEQYN[+1460.529]STYR.V	HexNAc(4)Hex(4)	N[+1461]	1044.78	3	3132.33	3132.34	0	-2.3	291	Specific	297.31	183.03	183.03	5.81	53	>sp|P0DOX5|IGG1_HUMAN Immunoglobulin gamma-1 heavy chain OS=Homo sapiens OX=9606 PE=1 SV=2	10252	20210911_zy_plasma_ethcd_2.1027.1027.3	controllerType=0 controllerNumber=1 scan=1027	4.8783
01226:3	2	K.N[+2059.735]NSDISSTR.G	HexNAc(4)Hex(5)Fuc(1)NeuAc(1)	N[+2060]	1018.4	3	3053.19	3053.19	0	-2.6	46	Specific	298.43	146.69	146.69	5.75	56	>sp|P01871|IGHM_HUMAN Immunoglobulin heavy constant mu OS=Homo sapiens OX=9606 GN=IGHM PE=1 SV=4	10127	20210911_zy_plasma_ethcd_2.1356.1356.3	controllerType=0 controllerNumber=1 scan=1356	6.3664
01188:2	2	K.N[+876.322]NSDISSTR.G	HexNAc(2)Hex(2)Fuc(1)	N[+876]	935.393	2	1869.78	1869.78	0	-2.1	46	Specific	298.88	181.07	181.07	5.62	56	>sp|P01871|IGHM_HUMAN Immunoglobulin heavy constant mu OS=Homo sapiens OX=9606 GN=IGHM PE=1 SV=4	10127	20210911_zy_plasma_ethcd_2.1314.1314.2	controllerType=0 controllerNumber=1 scan=1314	6.1794
01307:3	2	K.N[+2424.867]NSDISSTR.G	HexNAc(5)Hex(6)Fuc(1)NeuAc(1)	N[+2425]	1140.11	3	3418.32	3418.33	0	-2.3	46	Specific	300.4	121.2	121.2	5.71	56	>sp|P01871|IGHM_HUMAN Immunoglobulin heavy constant mu OS=Homo sapiens OX=9606 GN=IGHM PE=1 SV=4	10127	20210911_zy_plasma_ethcd_2.1445.1445.3	controllerType=0 controllerNumber=1 scan=1445	6.7708
10126:3	8	R.QDQC[+57.021]IYN[+2935.037]TTYLNVQR.E	HexNAc(6)Hex(7)NeuAc(2)	C[+57], N[+2935]	1617.65	3	4850.93	4850.93	0	-1.1	87	Specific	300.7	165.25	165.25	5.72	30	>sp|P02763|A1AG1_HUMAN Alpha-1-acid glycoprotein 1 OS=Homo sapiens OX=9606 GN=ORM1 PE=1 SV=1	2208	20210911_zy_plasma_ethcd_2.11106.11106.3	controllerType=0 controllerNumber=1 scan=11106	49.8491
00753:2	2	K.N[+1216.423]NSDISSTR.G	HexNAc(2)Hex(5)	N[+1216]	1105.44	2	2209.88	2209.88	0	-3	46	Specific	301.12	196.85	196.85	5.87	56	>sp|P01871|IGHM_HUMAN Immunoglobulin heavy constant mu OS=Homo sapiens OX=9606 GN=IGHM PE=1 SV=4	10127	20210911_zy_plasma_ethcd_2.837.837.2	controllerType=0 controllerNumber=1 scan=837	4.0004
06837:3	6	R.GTAGNALMDGASQLM[+15.995]GEN[+2204.772]R.T	HexNAc(4)Hex(5)NeuAc(2)	M[+16], N[+2205]	1371.88	3	4113.62	4113.63	0	-1.2	377	Specific	301.35	154.07	86.39	6.12	33	>sp|P02675|FIBB_HUMAN Fibrinogen beta chain OS=Homo sapiens OX=9606 GN=FGB PE=1 SV=2	6006	20210911_zy_plasma_ethcd_2.7499.7499.3	controllerType=0 controllerNumber=1 scan=7499	33.5939
01663:3	3	K.PREEQYN[+1589.571]STYR.V	HexNAc(4)Hex(3)NeuAc(1)	N[+1590]	1011.42	3	3032.24	3032.24	0	0.6	293	Specific	301.9	114.14	114.14	4.43	53	>sp|P0DOX5|IGG1_HUMAN Immunoglobulin gamma-1 heavy chain OS=Homo sapiens OX=9606 PE=1 SV=2	10252	20210911_zy_plasma_ethcd_2.1835.1835.3	controllerType=0 controllerNumber=1 scan=1835	8.4757
03809:3	1	K.NLFLNHSEN[+2204.772]ATAK.D	HexNAc(4)Hex(5)NeuAc(2)	N[+2205]	1221.84	3	3663.5	3663.51	0	-2	203	Specific	301.98	114.09	80.67	6.06	151	>sp|P00738|HPT_HUMAN Haptoglobin OS=Homo sapiens OX=9606 GN=HP PE=1 SV=1	3044	20210911_zy_plasma_ethcd_2.4185.4185.3	controllerType=0 controllerNumber=1 scan=4185	18.9038
14553:4	13	R.QQQHLFGSN[+2861.000]VTDC[+57.021]SGNFC[+57.021]LFR.S	HexNAc(5)Hex(6)NeuAc(3)	C[+57]*2, N[+2861]	1344.78	4	5376.11	5376.12	0	-1.7	622	Specific	302.01	203.38	203.38	6.52	17	>sp|TRFE_HUMAN|(Common contaminant protein)	20484	20210911_zy_plasma_ethcd_2.15960.15960.4	controllerType=0 controllerNumber=1 scan=15960	71.5636
06401:3	11	R.SWPAVGN[+1913.677]C[+57.021]SSALR.W	HexNAc(4)Hex(5)NeuAc(1)	C[+57], N[+1914]	1106.78	3	3318.34	3318.35	0	-3.1	181	Specific	302.37	104.15	104.15	5.84	25	>sp|P02790|HEMO_HUMAN Hemopexin OS=Homo sapiens OX=9606 GN=HPX PE=1 SV=2	9336	20210911_zy_plasma_ethcd_2.7022.7022.3	controllerType=0 controllerNumber=1 scan=7022	31.4883
01771:2	61	K.WVSN[+2204.772]K.T	HexNAc(4)Hex(5)NeuAc(2)	N[+2205]	1419.55	2	2838.1	2838.11	0	-2.5	221	Specific	302.56	69.52	69.52	2.83	7	>sp|P01008|ANT3_HUMAN Antithrombin-III OS=Homo sapiens OX=9606 GN=SERPINC1 PE=1 SV=1	546	20210911_zy_plasma_ethcd_2.1953.1953.2	controllerType=0 controllerNumber=1 scan=1953	8.9885
01671:3	25	K.PREEQYN[+1444.534]STFR.V	HexNAc(4)Hex(3)Fuc(1)	N[+1445]	957.737	3	2871.2	2871.2	0	-3.2	221	Specific	302.88	45.45	45.45	4.76	11	>sp|P01860|IGHG3_HUMAN Immunoglobulin heavy constant gamma 3 OS=Homo sapiens OX=9606 GN=IGHG3 PE=1 SV=2	2742	20210911_zy_plasma_ethcd_2.1843.1843.3	controllerType=0 controllerNumber=1 scan=1843	8.5113
02010:3	8	R.EN[+3226.132]GTISR.Y	HexNAc(6)Hex(7)NeuAc(3)	N[+3226]	1334.51	3	4001.51	4002.52	-1	-3.1	102	Specific	303.02	31.99	31.99	4.31	30	>sp|P02763|A1AG1_HUMAN Alpha-1-acid glycoprotein 1 OS=Homo sapiens OX=9606 GN=ORM1 PE=1 SV=1	2208	20210911_zy_plasma_ethcd_2.2214.2214.3	controllerType=0 controllerNumber=1 scan=2214	10.116
02591:3	4	R.EEQFN[+1930.692]STFR.V	HexNAc(4)Hex(6)Fuc(1)	N[+1931]	1030.07	3	3088.21	3088.21	0	-1.5	172	Specific	303.07	148.27	148.27	5.47	36	>sp|P01859|IGHG2_HUMAN Immunoglobulin heavy constant gamma 2 OS=Homo sapiens OX=9606 GN=IGHG2 PE=1 SV=2	2858	20210911_zy_plasma_ethcd_2.2850.2850.3	controllerType=0 controllerNumber=1 scan=2850	12.9385
09499:4	1	K.NLFLN[+3517.228]HSEN[+2204.772]ATAK.D	HexNAc(6)Hex(7)NeuAc(4),HexNAc(4)Hex(5)NeuAc(2)	N[+2205][+3517]	1795.68	4	7179.72	7180.73	-1	-1.7	203	Specific	303.4	171.49	8	6.03	151	>sp|P00738|HPT_HUMAN Haptoglobin OS=Homo sapiens OX=9606 GN=HP PE=1 SV=1	3044	20210911_zy_plasma_ethcd_2.10418.10418.4	controllerType=0 controllerNumber=1 scan=10418	46.7235
08063:3	8	R.QDQC[+57.021]IYN[+2643.941]TTYLNVQR.E	HexNAc(6)Hex(7)NeuAc(1)	C[+57], N[+2644]	1520.28	3	4558.83	4559.84	-1	-2.1	87	Specific	303.7	168.03	168.03	6.58	30	>sp|P02763|A1AG1_HUMAN Alpha-1-acid glycoprotein 1 OS=Homo sapiens OX=9606 GN=ORM1 PE=1 SV=1	2208	20210911_zy_plasma_ethcd_2.8842.8842.3	controllerType=0 controllerNumber=1 scan=8842	39.5669
00702:5	11	R.N[+2272.846]GTGHGN[+203.079]STHHGPEYMR.C	HexNAc(8)Hex(4),HexNAc(1)	N[+203][+2273]	866.149	5	4326.71	4327.72	-1	-0.3	240	Specific	303.83	217.98	102.83	5.64	25	>sp|P02790|HEMO_HUMAN Hemopexin OS=Homo sapiens OX=9606 GN=HPX PE=1 SV=2	9336	20210911_zy_plasma_ethcd_2.781.781.5	controllerType=0 controllerNumber=1 scan=781	3.7703
01093:3	3	K.TKPREEQYN[+1809.666]STYR.V	HexNAc(5)Hex(4)Fuc(1)	N[+1810]	1161.16	3	3481.47	3481.47	0	-2.1	291	Specific	303.96	42.42	42.42	5.81	53	>sp|P0DOX5|IGG1_HUMAN Immunoglobulin gamma-1 heavy chain OS=Homo sapiens OX=9606 PE=1 SV=2	10252	20210911_zy_plasma_ethcd_2.1210.1210.3	controllerType=0 controllerNumber=1 scan=1210	5.7058
09666:3	13	K.C[+57.021]GLVPVLAENYN[+2075.730]K.S	HexNAc(4)Hex(6)NeuAc(1)	C[+57], N[+2076]	1184.83	3	3552.47	3552.48	0	-2.1	421	Specific	304.39	194.01	194.01	6.11	17	>sp|TRFE_HUMAN|(Common contaminant protein)	20484	20210911_zy_plasma_ethcd_2.10601.10601.3	controllerType=0 controllerNumber=1 scan=10601	47.5458
07272:3	6	R.GTAGNALMDGASQLM[+15.995]GEN[+1622.582]R.T	HexNAc(4)Hex(5)	M[+16], N[+1623]	1177.81	3	3531.42	3531.44	0	-3.4	377	Specific	304.52	183.66	162.6	6.28	33	>sp|P02675|FIBB_HUMAN Fibrinogen beta chain OS=Homo sapiens OX=9606 GN=FGB PE=1 SV=2	6006	20210911_zy_plasma_ethcd_2.7975.7975.3	controllerType=0 controllerNumber=1 scan=7975	35.7171
12147:3	44	K.LQAPLN[+2204.772]YTEFQK.P	HexNAc(4)Hex(5)NeuAc(2)	N[+2205]	1219.51	3	3656.52	3656.53	0	-2.1	489	Specific	305.85	132.51	132.51	6.03	9	>sp|P03952|KLKB1_HUMAN Plasma kallikrein OS=Homo sapiens OX=9606 GN=KLKB1 PE=1 SV=1	11889	20210911_zy_plasma_ethcd_2.13324.13324.3	controllerType=0 controllerNumber=1 scan=13324	59.9116
10366:3	8	R.QDQC[+57.021]IYN[+2569.905]TTYLNVQR.E	HexNAc(5)Hex(6)NeuAc(2)	C[+57], N[+2570]	1495.93	3	4485.79	4485.8	0	-3.6	87	Specific	306.2	190.65	190.65	6.2	30	>sp|P02763|A1AG1_HUMAN Alpha-1-acid glycoprotein 1 OS=Homo sapiens OX=9606 GN=ORM1 PE=1 SV=1	2208	20210911_zy_plasma_ethcd_2.11369.11369.3	controllerType=0 controllerNumber=1 scan=11369	51.0278
00912:3	2	K.N[+1971.719]NSDISSTR.G	HexNAc(5)Hex(5)Fuc(1)	N[+1972]	989.062	3	2965.17	2965.18	0	-2.1	46	Specific	306.39	153.73	153.73	5.76	56	>sp|P01871|IGHM_HUMAN Immunoglobulin heavy constant mu OS=Homo sapiens OX=9606 GN=IGHM PE=1 SV=4	10127	20210911_zy_plasma_ethcd_2.1012.1012.3	controllerType=0 controllerNumber=1 scan=1012	4.8077
03424:3	12	K.IPC[+57.021]SQPPQIEHGTIN[+2059.735]SSR.S	HexNAc(4)Hex(5)Fuc(1)NeuAc(1)	C[+57], N[+2060]	1361.24	3	4081.7	4080.72	1	-5.1	868	Specific	306.69	132.6	132.6	5.85	17	>sp|P08603|CFAH_HUMAN Complement factor H OS=Homo sapiens OX=9606 GN=CFH PE=1 SV=4	385	20210911_zy_plasma_ethcd_2.3762.3762.3	controllerType=0 controllerNumber=1 scan=3762	17.001
08501:3	11	R.SWPAVGN[+2204.772]C[+57.021]SSALR.W	HexNAc(4)Hex(5)NeuAc(2)	C[+57], N[+2205]	1203.82	3	3609.43	3609.44	0	-2.4	181	Specific	306.89	147.42	147.42	6.1	25	>sp|P02790|HEMO_HUMAN Hemopexin OS=Homo sapiens OX=9606 GN=HPX PE=1 SV=2	9336	20210911_zy_plasma_ethcd_2.9322.9322.3	controllerType=0 controllerNumber=1 scan=9322	41.716
03979:3	50	R.DIENFN[+2204.772]STQK.F	HexNAc(4)Hex(5)NeuAc(2)	N[+2205]	1134.11	3	3400.32	3400.33	0	-2.5	28	Specific	306.92	138.66	138.66	5.73	2	>sp|P43652|AFAM_HUMAN Afamin OS=Homo sapiens OX=9606 GN=AFM PE=1 SV=1	20367	20210911_zy_plasma_ethcd_2.4371.4371.3	controllerType=0 controllerNumber=1 scan=4371	19.734
15016:3	36	K.YTGN[+3007.058]ASALFILPDQDK.M	HexNAc(5)Hex(6)Fuc(1)NeuAc(3)	N[+3007]	1587.32	3	4759.93	4759.94	0	-1.2	268	Specific	307.34	190.23	190.23	6.08	8	>sp|P01011|AACT_HUMAN Alpha-1-antichymotrypsin OS=Homo sapiens OX=9606 GN=SERPINA3 PE=1 SV=2	8788	20210911_zy_plasma_ethcd_2.16467.16467.3	controllerType=0 controllerNumber=1 scan=16467	73.8195
13940:3	13	R.QQQHLFGSN[+2204.772]VTDC[+57.021]SGNFC[+57.021]LFR.S	HexNAc(4)Hex(5)NeuAc(2)	C[+57]*2, N[+2205]	1573.97	3	4719.9	4719.9	0	0.4	622	Specific	307.8	216.77	216.77	5.72	17	>sp|TRFE_HUMAN|(Common contaminant protein)	20484	20210911_zy_plasma_ethcd_2.15288.15288.3	controllerType=0 controllerNumber=1 scan=15288	68.5983
12431:3	13	K.C[+57.021]GLVPVLAENYN[+2569.905]K.S	HexNAc(5)Hex(6)NeuAc(2)	C[+57], N[+2570]	1349.56	3	4046.65	4046.66	0	-1.1	421	Specific	307.83	171.21	171.21	5.46	17	>sp|TRFE_HUMAN|(Common contaminant protein)	20484	20210911_zy_plasma_ethcd_2.13635.13635.3	controllerType=0 controllerNumber=1 scan=13635	61.2944
05209:3	7	K.EHEGAIYPDN[+2715.963]TTDFQR.A	HexNAc(5)Hex(6)Fuc(1)NeuAc(2)	N[+2716]	1536.6	3	4607.79	4608.8	-1	-2.1	129	Specific	308.17	198.63	198.63	6.66	24	>sp|P00450|CERU_HUMAN Ceruloplasmin OS=Homo sapiens OX=9606 GN=CP PE=1 SV=1	460	20210911_zy_plasma_ethcd_2.5718.5718.3	controllerType=0 controllerNumber=1 scan=5718	25.7279
10199:3	6	K.YRGTAGNALMDGASQLMGEN[+1913.677]R.T	HexNAc(4)Hex(5)NeuAc(1)	N[+1914]	1375.9	3	4125.69	4125.7	0	-2.6	375	Specific	308.22	215.73	70.25	6.82	33	>sp|P02675|FIBB_HUMAN Fibrinogen beta chain OS=Homo sapiens OX=9606 GN=FGB PE=1 SV=2	6006	20210911_zy_plasma_ethcd_2.11186.11186.3	controllerType=0 controllerNumber=1 scan=11186	50.2089
04365:3	5	K.TPLTAN[+2350.830]ITK.S	HexNAc(4)Hex(5)Fuc(1)NeuAc(2)	N[+2351]	1103.8	3	3309.38	3309.39	0	-2.1	200	Specific	308.55	169.08	169.08	5.76	33	>sp|P01877|IGHA2_HUMAN Immunoglobulin heavy constant alpha 2 OS=Homo sapiens OX=9606 GN=IGHA2 PE=1 SV=4	10403	20210911_zy_plasma_ethcd_2.4793.4793.3	controllerType=0 controllerNumber=1 scan=4793	21.5873
07117:4	1	K.NLFLN[+4028.418]HSEN[+1548.545]ATAK.D	HexNAc(7)Hex(8)Fuc(1)NeuAc(4),HexNAc(3)Hex(4)NeuAc(1)	N[+1549][+4028]	1759.43	4	7034.68	7035.7	-1	-1.2	203	Specific	308.65	308.65	0	6.22	151	>sp|P00738|HPT_HUMAN Haptoglobin OS=Homo sapiens OX=9606 GN=HP PE=1 SV=1	3044	20210911_zy_plasma_ethcd_2.7806.7806.4	controllerType=0 controllerNumber=1 scan=7806	34.9666
01792:3	4	K.TKPREEQFN[+1647.613]STFR.V	HexNAc(5)Hex(3)Fuc(1)	N[+1648]	1096.48	3	3287.42	3287.43	0	-2.7	168	Specific	308.72	193.93	193.93	6.1	36	>sp|P01859|IGHG2_HUMAN Immunoglobulin heavy constant gamma 2 OS=Homo sapiens OX=9606 GN=IGHG2 PE=1 SV=2	2858	20210911_zy_plasma_ethcd_2.1976.1976.3	controllerType=0 controllerNumber=1 scan=1976	9.0883
11558:3	1	K.VVLHPN[+1913.677]YSQVDIGLIK.L	HexNAc(4)Hex(5)NeuAc(1)	N[+1914]	1236.9	3	3708.67	3708.69	0	-4.7	236	Specific	308.74	100.84	100.84	5.71	151	>sp|P00738|HPT_HUMAN Haptoglobin OS=Homo sapiens OX=9606 GN=HP PE=1 SV=1	3044	20210911_zy_plasma_ethcd_2.12677.12677.3	controllerType=0 controllerNumber=1 scan=12677	56.9385
02839:3	54	K.EWDN[+2204.772]TTTEC[+57.021]R.L	HexNAc(4)Hex(5)NeuAc(2)	C[+57], N[+2205]	1172.77	3	3516.29	3516.3	0	-2.9	68	Specific	308.85	163.12	163.12	5.78	4	>sp|P20851|C4BPB_HUMAN C4b-binding protein beta chain OS=Homo sapiens OX=9606 GN=C4BPB PE=1 SV=1	20233	20210911_zy_plasma_ethcd_2.3122.3122.3	controllerType=0 controllerNumber=1 scan=3122	14.1497
12780:3	13	K.C[+57.021]GLVPVLAENYN[+2204.772]K.S	HexNAc(4)Hex(5)NeuAc(2)	C[+57], N[+2205]	1227.84	3	3681.51	3681.52	0	-2.8	421	Specific	308.95	185.81	185.81	6.13	17	>sp|TRFE_HUMAN|(Common contaminant protein)	20484	20210911_zy_plasma_ethcd_2.14017.14017.3	controllerType=0 controllerNumber=1 scan=14017	62.9766
12258:4	14	R.QNQC[+57.021]FYN[+3226.132]SSYLNVQR.E	HexNAc(6)Hex(7)NeuAc(3)	C[+57], N[+3226]	1287.5	4	5146.99	5147	0	-1.1	87	Specific	309.11	190.84	190.84	5.9	18	>sp|P19652|A1AG2_HUMAN Alpha-1-acid glycoprotein 2 OS=Homo sapiens OX=9606 GN=ORM2 PE=1 SV=2	4531	20210911_zy_plasma_ethcd_2.13446.13446.4	controllerType=0 controllerNumber=1 scan=13446	60.4586
10408:3	49	K.EGYSN[+2204.772]ISYIVVNHQGISSR.L	HexNAc(4)Hex(5)NeuAc(2)	N[+2205]	1443.28	3	4327.82	4327.82	0	-1.4	79	Specific	309.22	186.75	186.75	6.21	2	>sp|P49908|SEPP1_HUMAN Selenoprotein P OS=Homo sapiens OX=9606 GN=SELENOP PE=1 SV=3	16703	20210911_zy_plasma_ethcd_2.11415.11415.3	controllerType=0 controllerNumber=1 scan=11415	51.2342
00975:3	3	K.TKPREEQYN[+1606.587]STYR.V	HexNAc(4)Hex(4)Fuc(1)	N[+1607]	1093.47	3	3278.39	3278.4	0	-2.3	291	Specific	309.25	48.37	48.37	5.81	53	>sp|P0DOX5|IGG1_HUMAN Immunoglobulin gamma-1 heavy chain OS=Homo sapiens OX=9606 PE=1 SV=2	10252	20210911_zy_plasma_ethcd_2.1081.1081.3	controllerType=0 controllerNumber=1 scan=1081	5.1211
01218:3	40	K.N[+1913.677]GTAVC[+57.021]ATNR.R	HexNAc(4)Hex(5)NeuAc(1)	C[+57], N[+1914]	993.059	3	2977.16	2977.17	0	-3	70	Specific	309.34	170.12	170.12	5.59	4	>sp|P05156|CFAI_HUMAN Complement factor I OS=Homo sapiens OX=9606 GN=CFI PE=1 SV=2	8939	20210911_zy_plasma_ethcd_2.1348.1348.3	controllerType=0 controllerNumber=1 scan=1348	6.3288
01272:3	2	K.N[+2100.761]NSDISSTR.G	HexNAc(5)Hex(4)Fuc(1)NeuAc(1)	N[+2101]	1032.08	3	3094.21	3094.22	0	-3	46	Specific	311.8	123.77	123.77	5.73	56	>sp|P01871|IGHM_HUMAN Immunoglobulin heavy constant mu OS=Homo sapiens OX=9606 GN=IGHM PE=1 SV=4	10127	20210911_zy_plasma_ethcd_2.1407.1407.3	controllerType=0 controllerNumber=1 scan=1407	6.5932
12598:4	17	R.HGIQYFNN[+3007.058]NTQHSSLFM[+15.995]LNEVK.R	HexNAc(5)Hex(6)Fuc(1)NeuAc(3)	M[+16], N[+3007]	1411.83	4	5644.29	5644.31	0	-3.9	162	Specific	311.82	269.88	269.88	6.75	18	>sp|P01042|KNG1_HUMAN Kininogen-1 OS=Homo sapiens OX=9606 GN=KNG1 PE=1 SV=2	6533	20210911_zy_plasma_ethcd_2.13818.13818.4	controllerType=0 controllerNumber=1 scan=13818	62.1003
14159:3	7	K.EN[+2861.000]LTAPGSDSAVFFEQGTTR.I	HexNAc(5)Hex(6)NeuAc(3)	N[+2861]	1663	3	4986.98	4988	-1	-3	396	Specific	312.05	198.78	198.78	6.94	24	>sp|P00450|CERU_HUMAN Ceruloplasmin OS=Homo sapiens OX=9606 GN=CP PE=1 SV=1	460	20210911_zy_plasma_ethcd_2.15528.15528.3	controllerType=0 controllerNumber=1 scan=15528	69.6431
09955:3	6	R.GTAGNALMDGASQLMGEN[+1622.582]R.T	HexNAc(4)Hex(5)	N[+1623]	1172.48	3	3515.43	3515.44	0	-3.1	377	Specific	312.15	205.44	120.35	6.22	33	>sp|P02675|FIBB_HUMAN Fibrinogen beta chain OS=Homo sapiens OX=9606 GN=FGB PE=1 SV=2	6006	20210911_zy_plasma_ethcd_2.10918.10918.3	controllerType=0 controllerNumber=1 scan=10918	48.9793
02042:3	4	K.PREEQFN[+1606.587]STFR.V	HexNAc(4)Hex(4)Fuc(1)	N[+1607]	1006.42	3	3017.26	3017.26	0	-2.5	170	Specific	312.3	188.22	188.22	5.68	36	>sp|P01859|IGHG2_HUMAN Immunoglobulin heavy constant gamma 2 OS=Homo sapiens OX=9606 GN=IGHG2 PE=1 SV=2	2858	20210911_zy_plasma_ethcd_2.2249.2249.3	controllerType=0 controllerNumber=1 scan=2249	10.2636
[truncated: 353 more rows]

## Sheet: EThcD-R3
Query #:z	Protein Rank	Peptide < ProteinMetrics Confidential >	Glycans NHFAGNa	Modification Type(s)	Observed m/z	z	Observed (M+H)	Calc. mass (M+H)	Off-by-x error	Mass error (ppm)	Starting position	Cleavage	Score	Delta	Delta Mod	|Log Prob|	# of unique peptides	Protein Name	Protein DB number	Comment	Scan #	Scan Time
[truncated: 705 more rows]

[truncated: 12 more sheets: sceHCD-R1, sceHCD-R2, sceHCD-R3, EThcD-sceHCD-R1, EThcD-sceHCD-R2, EThcD-sceHCD-R3, HCD-pd-ETD-R1, HCD-pd-ETD-R2, HCD-pd-ETD-R3, sceHCD-pd-ETD-R1, sceHCD-pd-ETD-R2, sceHCD-pd-ETD-R3]
