# Supplementary material for: Comparative N-Glycoproteomics Analysis of Clinical Samples Via Different Mass Spectrometry Dissociation Methods
Source: Front Chem. 2022 Feb 24;10:839470. doi: 10.3389/fchem.2022.839470 (PMC8907888; doi:10.3389/fchem.2022.839470)
Supplement: Supplementary file 1 [file DataSheet1.ZIP › Table S2-Intact N-glycopeptides identified from IgAN patients' urine using five methods.xls]

## Sheet: EThcD-R1
Query #:z	Protein Rank	Peptide < ProteinMetrics Confidential >	Glycans NHFAGNa	Modification Type(s)	Observed m/z	z	Observed (M+H)	Calc. mass (M+H)	Off-by-x error	Mass error (ppm)	Starting position	Cleavage	Score	Delta	Delta Mod	|Log Prob|	# of unique peptides	Protein Name	Protein DB number	Comment	Scan #	Scan Time
14784:4	2	R.QDQC[+57.021]IYN[+2878.015]TTYLNVQR.E	HexNAc(5)Hex(7)Fuc(1)NeuAc(2)	C[+57], N[+2878]	1199.24	4	4793.92	4793.91	0	1.7	87	Specific	200.28	125.89	125.89	4.35	53	>sp|P02763|A1AG1_HUMAN Alpha-1-acid glycoprotein 1 OS=Homo sapiens OX=9606 GN=ORM1 PE=1 SV=1	2208	20210911_zy_urine_ethcd_1.16208.16208.4	controllerType=0 controllerNumber=1 scan=16208	72.258
14097:3	9	R.QQQHLFGSN[+1913.677]VTDC[+57.021]SGNFC[+57.021]LFR.S	HexNAc(4)Hex(5)NeuAc(1)	C[+57]*2, N[+1914]	1477.28	3	4429.82	4428.8	1	3.4	622	Specific	200.64	80.04	80.04	4	20	>sp|P02787|TRFE_HUMAN Serotransferrin OS=Homo sapiens OX=9606 GN=TF PE=1 SV=3	18223	20210911_zy_urine_ethcd_1.15457.15457.3	controllerType=0 controllerNumber=1 scan=15457	68.9723
08797:3	8	K.DIVEYYNDSN[+2204.772]GSHVLQGR.F	HexNAc(4)Hex(5)NeuAc(2)	N[+2205]	1424.24	3	4270.71	4270.73	0	-4	103	Specific	200.75	47.17	41.15	4.47	33	>sp|P25311|ZA2G_HUMAN Zinc-alpha-2-glycoprotein OS=Homo sapiens OX=9606 GN=AZGP1 PE=1 SV=2	18783	20210911_zy_urine_ethcd_1.9655.9655.3	controllerType=0 controllerNumber=1 scan=9655	43.1905
05683:3	84	R.IN[+2627.947]NSLSELR.R	HexNAc(6)Hex(6)Fuc(1)NeuAc(1)	N[+2628]	1225.17	3	3673.49	3673.51	0	-4.6	65	Specific	201.07	21.57	21.57	1.01	10	>sp|Q9Y5J3|HEY1_HUMAN Hairy/enhancer-of-split related with YRPW motif protein 1 OS=Homo sapiens OX=9606 GN=HEY1 PE=1 SV=1	12003	20210911_zy_urine_ethcd_1.6241.6241.3	controllerType=0 controllerNumber=1 scan=6241	27.983
01809:2	14	R.EEQFN[+1444.534]STYR.V	HexNAc(4)Hex(3)Fuc(1)	N[+1445]	1309.53	2	2618.05	2618.05	0	-0.6	173	Specific	201.15	17.24	17.24	1.67	17	>sp|P01861|IGHG4_HUMAN Immunoglobulin heavy constant gamma 4 OS=Homo sapiens OX=9606 GN=IGHG4 PE=1 SV=1	12793	20210911_zy_urine_ethcd_1.1991.1991.2	controllerType=0 controllerNumber=1 scan=1991	9.0898
04767:3	10	R.EEQFN[+2350.830]STFR.V	HexNAc(4)Hex(5)Fuc(1)NeuAc(2)	N[+2351]	1170.12	3	3508.35	3508.35	0	-1.1	172	Specific	201.24	66.56	66.56	4.11	27	>sp|P01859|IGHG2_HUMAN Immunoglobulin heavy constant gamma 2 OS=Homo sapiens OX=9606 GN=IGHG2 PE=1 SV=2	2858	20210911_zy_urine_ethcd_1.5237.5237.3	controllerType=0 controllerNumber=1 scan=5237	23.4706
08852:3	29	R.SWPAVGN[+2350.830]C[+57.021]SSALR.W	HexNAc(4)Hex(5)Fuc(1)NeuAc(2)	C[+57], N[+2351]	1252.5	3	3755.49	3755.5	0	-1.3	181	Specific	201.33	58.98	58.98	3.62	8	>sp|P02790|HEMO_HUMAN Hemopexin OS=Homo sapiens OX=9606 GN=HPX PE=1 SV=2	9336	20210911_zy_urine_ethcd_1.9716.9716.3	controllerType=0 controllerNumber=1 scan=9716	43.4729
06709:3	60	K.GN[+1710.598]ETIVNLIHSTR.I	HexNAc(3)Hex(5)NeuAc(1)	N[+1711]	1055.46	3	3164.37	3164.37	0	0.4	138	Specific	201.35	31.29	31.29	1.07	3	>sp|P16870|CBPE_HUMAN Carboxypeptidase E OS=Homo sapiens OX=9606 GN=CPE PE=1 SV=1	11256	20210911_zy_urine_ethcd_1.7366.7366.3	controllerType=0 controllerNumber=1 scan=7366	33.0044
05285:3	153	R.KMN[+2350.830]SSGC[+57.021]LSEEVGSLR.P	HexNAc(4)Hex(5)Fuc(1)NeuAc(2)	C[+57], N[+2351]	1369.23	3	4105.66	4104.65	1	2.5	28	Specific	201.55	46.48	46.48	0.68	3	>sp|O75388|GPR32_HUMAN Probable G-protein coupled receptor 32 OS=Homo sapiens OX=9606 GN=GPR32 PE=2 SV=1	4827	20210911_zy_urine_ethcd_1.5805.5805.3	controllerType=0 controllerNumber=1 scan=5805	26.0272
03756:3	39	R.DIENFN[+2350.830]STQK.F	HexNAc(4)Hex(5)Fuc(1)NeuAc(2)	N[+2351]	1182.8	3	3546.39	3546.39	0	1.6	28	Specific	201.62	51.14	51.14	1.82	7	>sp|P43652|AFAM_HUMAN Afamin OS=Homo sapiens OX=9606 GN=AFM PE=1 SV=1	20367	20210911_zy_urine_ethcd_1.4127.4127.3	controllerType=0 controllerNumber=1 scan=4127	18.4388
02561:3	10	R.EEQFN[+1809.666]STFR.V	HexNAc(5)Hex(4)Fuc(1)	N[+1810]	989.732	3	2967.18	2967.19	0	-1.8	172	Specific	201.93	32.94	32.94	2.93	27	>sp|P01859|IGHG2_HUMAN Immunoglobulin heavy constant gamma 2 OS=Homo sapiens OX=9606 GN=IGHG2 PE=1 SV=2	2858	20210911_zy_urine_ethcd_1.2815.2815.3	controllerType=0 controllerNumber=1 scan=2815	12.5615
11070:3	29	R.SWPAVGN[+3007.058]C[+57.021]SSALR.W	HexNAc(5)Hex(6)Fuc(1)NeuAc(3)	C[+57], N[+3007]	1471.25	3	4411.73	4411.73	0	-0.2	181	Specific	202.09	64.19	64.19	2.9	8	>sp|P02790|HEMO_HUMAN Hemopexin OS=Homo sapiens OX=9606 GN=HPX PE=1 SV=2	9336	20210911_zy_urine_ethcd_1.12145.12145.3	controllerType=0 controllerNumber=1 scan=12145	54.2944
06372:3	6	R.MAGKPTHIN[+2059.735]VSVVM[+15.995]AEADGTC[+57.021].Y	HexNAc(4)Hex(5)Fuc(1)NeuAc(1)	C[+57], M[+16], N[+2060]	1421.92	3	4263.74	4263.75	0	-2.3	319	CRagged	202.18	39.17	39.17	4.51	32	>sp|P01877|IGHA2_HUMAN Immunoglobulin heavy constant alpha 2 OS=Homo sapiens OX=9606 GN=IGHA2 PE=1 SV=4	10403	20210911_zy_urine_ethcd_1.6997.6997.3	controllerType=0 controllerNumber=1 scan=6997	31.3657
04305:3	6	K.TPLTAN[+2715.963]ITK.S	HexNAc(5)Hex(6)Fuc(1)NeuAc(2)	N[+2716]	1225.51	3	3674.52	3674.52	0	-0.1	200	Specific	202.4	54.01	54.01	2.74	32	>sp|P01877|IGHA2_HUMAN Immunoglobulin heavy constant alpha 2 OS=Homo sapiens OX=9606 GN=IGHA2 PE=1 SV=4	10403	20210911_zy_urine_ethcd_1.4730.4730.3	controllerType=0 controllerNumber=1 scan=4730	21.1745
02207:2	6	K.TPLTAN[+1768.640]ITK.S	HexNAc(4)Hex(5)Fuc(1)	N[+1769]	1364.1	2	2727.19	2727.2	0	-1.3	200	Specific	202.46	82.81	82.81	4.26	32	>sp|P01877|IGHA2_HUMAN Immunoglobulin heavy constant alpha 2 OS=Homo sapiens OX=9606 GN=IGHA2 PE=1 SV=4	10403	20210911_zy_urine_ethcd_1.2426.2426.2	controllerType=0 controllerNumber=1 scan=2426	10.8943
06016:3	62	R.EDQYHYLLDRN[+1897.682]LSC[+57.021]R.V	HexNAc(4)Hex(4)Fuc(1)NeuAc(1)	C[+57], N[+1898]	1293.87	3	3879.59	3879.6	0	-3.6	239	Specific	202.5	60.23	60.23	1.82	4	>sp|P05154|IPSP_HUMAN Plasma serine protease inhibitor OS=Homo sapiens OX=9606 GN=SERPINA5 PE=1 SV=3	2042	20210911_zy_urine_ethcd_1.6607.6607.3	controllerType=0 controllerNumber=1 scan=6607	29.6308
07658:3	46	R.GGYIFPTQQPN[+1971.719]TTTLASR.K	HexNAc(5)Hex(5)Fuc(1)	N[+1972]	1308.57	3	3923.71	3923.71	0	0.8	817	Specific	202.83	91.99	91.99	4.16	5	>sp|O43451|MGA_HUMAN Maltase-glucoamylase, intestinal OS=Homo sapiens OX=9606 GN=MGAM PE=1 SV=5	7929	20210911_zy_urine_ethcd_1.8408.8408.3	controllerType=0 controllerNumber=1 scan=8408	37.645
10009:3	79	R.PNVYWIN[+3007.058]K.T	HexNAc(5)Hex(6)Fuc(1)NeuAc(3)	N[+3007]	1347.2	3	4039.59	4040.6	-1	-1.9	167	Specific	203.26	85.02	85.02	2.62	5	>sp|O75144|ICOSL_HUMAN ICOS ligand OS=Homo sapiens OX=9606 GN=ICOSLG PE=1 SV=2	2737	20210911_zy_urine_ethcd_1.10983.10983.3	controllerType=0 controllerNumber=1 scan=10983	49.1528
14794:3	2	R.QDQC[+57.021]IYN[+2553.910]TTYLNVQR.E	HexNAc(5)Hex(5)Fuc(1)NeuAc(2)	C[+57], N[+2554]	1490.26	3	4468.78	4469.81	-1	-5.5	87	Specific	203.28	59.29	59.29	4.48	53	>sp|P02763|A1AG1_HUMAN Alpha-1-acid glycoprotein 1 OS=Homo sapiens OX=9606 GN=ORM1 PE=1 SV=1	2208	20210911_zy_urine_ethcd_1.16219.16219.3	controllerType=0 controllerNumber=1 scan=16219	72.3054
02229:3	6	K.TPLTAN[+1971.719]ITK.S	HexNAc(5)Hex(5)Fuc(1)	N[+1972]	977.428	3	2930.27	2930.28	0	-2.5	200	Specific	203.42	97.83	97.83	4.24	32	>sp|P01877|IGHA2_HUMAN Immunoglobulin heavy constant alpha 2 OS=Homo sapiens OX=9606 GN=IGHA2 PE=1 SV=4	10403	20210911_zy_urine_ethcd_1.2450.2450.3	controllerType=0 controllerNumber=1 scan=2450	10.9972
05709:3	1	R.C[+57.021]NTAAPMWLN[+1702.581]GTHPSSDEGIVSR.K	HexNAc(2)Hex(8)	C[+57], N[+1703]	1401.91	3	4203.71	4202.72	1	-1.4	223	Specific	203.62	31.59	31.59	4.28	49	>sp|P07911|UROM_HUMAN Uromodulin OS=Homo sapiens OX=9606 GN=UMOD PE=1 SV=1	16609	20210911_zy_urine_ethcd_1.6270.6270.3	controllerType=0 controllerNumber=1 scan=6270	28.1086
04360:3	6	K.TPLTAN[+2350.830]ITK.S	HexNAc(4)Hex(5)Fuc(1)NeuAc(2)	N[+2351]	1103.8	3	3309.37	3309.39	0	-3.9	200	Specific	203.67	56.28	56.28	3.98	32	>sp|P01877|IGHA2_HUMAN Immunoglobulin heavy constant alpha 2 OS=Homo sapiens OX=9606 GN=IGHA2 PE=1 SV=4	10403	20210911_zy_urine_ethcd_1.4790.4790.3	controllerType=0 controllerNumber=1 scan=4790	21.4479
12478:3	95	K.GVPQPN[+2569.905]ITWLKR.G	HexNAc(5)Hex(6)NeuAc(2)	N[+2570]	1326.91	3	3978.71	3978.71	0	0.8	1325	Specific	203.67	29.34	29.34	0.5	13	>sp|P82987|ATL3_HUMAN ADAMTS-like protein 3 OS=Homo sapiens OX=9606 GN=ADAMTSL3 PE=1 SV=4	20246	20210911_zy_urine_ethcd_1.13687.13687.4	controllerType=0 controllerNumber=1 scan=13687	61.2038
10384:3	1	R.FALLMTNC[+57.021]YATPSSN[+2116.756]ATDPLK.Y	HexNAc(5)Hex(5)NeuAc(1)	C[+57], N[+2117]	1477.96	3	4431.85	4431.86	0	-1.6	499	Specific	203.71	117.98	69.71	4.81	49	>sp|P07911|UROM_HUMAN Uromodulin OS=Homo sapiens OX=9606 GN=UMOD PE=1 SV=1	16609	20210911_zy_urine_ethcd_1.11394.11394.3	controllerType=0 controllerNumber=1 scan=11394	50.9643
06341:4	1	R.C[+57.021]NTAAPMWLN[+2262.814]GTHPSSDEGIVSR.K	HexNAc(5)Hex(5)Fuc(1)NeuAc(1)	C[+57], N[+2263]	1191.24	4	4761.92	4762.95	-1	-4.5	223	Specific	204.29	104.52	53.37	5.07	49	>sp|P07911|UROM_HUMAN Uromodulin OS=Homo sapiens OX=9606 GN=UMOD PE=1 SV=1	16609	20210911_zy_urine_ethcd_1.6963.6963.4	controllerType=0 controllerNumber=1 scan=6963	31.2196
04252:2	6	K.TPLTAN[+2350.830]ITK.S	HexNAc(4)Hex(5)Fuc(1)NeuAc(2)	N[+2351]	1655.2	2	3309.38	3309.39	0	-0.9	200	Specific	204.42	27.23	27.23	2.63	32	>sp|P01877|IGHA2_HUMAN Immunoglobulin heavy constant alpha 2 OS=Homo sapiens OX=9606 GN=IGHA2 PE=1 SV=4	10403	20210911_zy_urine_ethcd_1.4671.4671.2	controllerType=0 controllerNumber=1 scan=4671	20.9066
08450:3	84	R.IN[+2919.042]NSLSELR.R	HexNAc(6)Hex(6)Fuc(1)NeuAc(2)	N[+2919]	1322.2	3	3964.59	3964.61	0	-4.1	65	Specific	204.81	6.6	6.6	1	10	>sp|Q9Y5J3|HEY1_HUMAN Hairy/enhancer-of-split related with YRPW motif protein 1 OS=Homo sapiens OX=9606 GN=HEY1 PE=1 SV=1	12003	20210911_zy_urine_ethcd_1.9275.9275.3	controllerType=0 controllerNumber=1 scan=9275	41.4844
05516:3	61	R.RGVFITN[+1378.476]ETGQPLIGK.V	HexNAc(2)Hex(6)	N[+1378]	1036.81	3	3108.42	3108.44	0	-4.2	464	Specific	205.11	148.14	148.14	3.03	2	>sp|P10253|LYAG_HUMAN Lysosomal alpha-glucosidase OS=Homo sapiens OX=9606 GN=GAA PE=1 SV=4	2747	20210911_zy_urine_ethcd_1.6058.6058.3	controllerType=0 controllerNumber=1 scan=6058	27.1584
01693:3	4	R.EN[+3007.058]GTVSR.Y	HexNAc(5)Hex(6)Fuc(1)NeuAc(3)	N[+3007]	1257.15	3	3769.42	3769.43	0	-2.2	102	Specific	205.39	19.87	19.87	1.23	34	>sp|P19652|A1AG2_HUMAN Alpha-1-acid glycoprotein 2 OS=Homo sapiens OX=9606 GN=ORM2 PE=1 SV=2	4531	20210911_zy_urine_ethcd_1.1865.1865.3	controllerType=0 controllerNumber=1 scan=1865	8.5492
10427:4	2	R.QDQC[+57.021]IYN[+3081.095]TTYLNVQR.E	HexNAc(6)Hex(7)Fuc(1)NeuAc(2)	C[+57], N[+3081]	1249.75	4	4995.97	4996.99	-1	-4.3	87	Specific	205.61	90.74	90.74	5.23	53	>sp|P02763|A1AG1_HUMAN Alpha-1-acid glycoprotein 1 OS=Homo sapiens OX=9606 GN=ORM1 PE=1 SV=1	2208	20210911_zy_urine_ethcd_1.11441.11441.4	controllerType=0 controllerNumber=1 scan=11441	51.1743
12627:3	99	K.GWN[+2350.830]WTSGFNK.C	HexNAc(4)Hex(5)Fuc(1)NeuAc(2)	N[+2351]	1183.13	3	3547.38	3547.38	0	-1	159	Specific	206.04	80.34	80.34	1.04	2	>sp|P15328|FOLR1_HUMAN Folate receptor alpha OS=Homo sapiens OX=9606 GN=FOLR1 PE=1 SV=3	2914	20210911_zy_urine_ethcd_1.13850.13850.3	controllerType=0 controllerNumber=1 scan=13850	61.9131
08556:3	84	R.IN[+2553.910]NSLSELR.R	HexNAc(5)Hex(5)Fuc(1)NeuAc(2)	N[+2554]	1200.49	3	3599.46	3599.47	0	-5	65	Specific	206.14	15.36	15.36	1	10	>sp|Q9Y5J3|HEY1_HUMAN Hairy/enhancer-of-split related with YRPW motif protein 1 OS=Homo sapiens OX=9606 GN=HEY1 PE=1 SV=1	12003	20210911_zy_urine_ethcd_1.9391.9391.3	controllerType=0 controllerNumber=1 scan=9391	41.9971
14925:4	1	R.FALLM[+15.995]TNC[+57.021]YATPSSN[+3007.058]ATDPLK.Y	HexNAc(5)Hex(6)Fuc(1)NeuAc(3)	C[+57], M[+16], N[+3007]	1335.04	4	5337.14	5338.16	-1	-1.9	499	Specific	206.67	152.54	152.54	5.79	49	>sp|P07911|UROM_HUMAN Uromodulin OS=Homo sapiens OX=9606 GN=UMOD PE=1 SV=1	16609	20210911_zy_urine_ethcd_1.16363.16363.3	controllerType=0 controllerNumber=1 scan=16363	72.9419
12614:3	78	K.AFN[+2350.830]STLPTMAQMEK.A	HexNAc(4)Hex(5)Fuc(1)NeuAc(2)	N[+2351]	1307.19	3	3919.57	3919.58	0	-1.5	55	Specific	206.71	64.72	64.72	2.74	3	>sp|P16070|CD44_HUMAN CD44 antigen OS=Homo sapiens OX=9606 GN=CD44 PE=1 SV=3	1144	20210911_zy_urine_ethcd_1.13836.13836.3	controllerType=0 controllerNumber=1 scan=13836	61.8542
11931:4	7	R.ADGTVNQIEGEATPVN[+2569.905]LTEPAK.L	HexNAc(5)Hex(6)NeuAc(2)	N[+2570]	1206.76	4	4824.01	4824.02	0	-2.4	83	Specific	206.72	169.36	169.36	5.48	25	>sp|P05090|APOD_HUMAN Apolipoprotein D OS=Homo sapiens OX=9606 GN=APOD PE=1 SV=1	120	20210911_zy_urine_ethcd_1.13089.13089.4	controllerType=0 controllerNumber=1 scan=13089	58.5615
12759:3	13	K.VPGN[+2100.761]VTAVLGETLK.V	HexNAc(5)Hex(4)Fuc(1)NeuAc(1)	N[+2101]	1166.86	3	3498.55	3498.56	0	-1.9	466	Specific	206.84	74.55	74.55	4.22	16	>sp|P01833|PIGR_HUMAN Polymeric immunoglobulin receptor OS=Homo sapiens OX=9606 GN=PIGR PE=1 SV=4	10083	20210911_zy_urine_ethcd_1.13995.13995.3	controllerType=0 controllerNumber=1 scan=13995	62.5646
02839:3	10	R.EEQFN[+2059.735]STFR.V	HexNAc(4)Hex(5)Fuc(1)NeuAc(1)	N[+2060]	1073.09	3	3217.25	3217.26	0	-3.4	172	Specific	207.36	41.64	41.64	2.55	27	>sp|P01859|IGHG2_HUMAN Immunoglobulin heavy constant gamma 2 OS=Homo sapiens OX=9606 GN=IGHG2 PE=1 SV=2	2858	20210911_zy_urine_ethcd_1.3119.3119.3	controllerType=0 controllerNumber=1 scan=3119	13.9122
03312:3	47	K.MFSQN[+2861.000]DTR.C	HexNAc(5)Hex(6)NeuAc(3)	N[+2861]	1287.15	3	3859.42	3859.44	0	-3.9	321	Specific	207.41	49.81	49.81	2.7	5	>sp|P02750|A2GL_HUMAN Leucine-rich alpha-2-glycoprotein OS=Homo sapiens OX=9606 GN=LRG1 PE=1 SV=2	1095	20210911_zy_urine_ethcd_1.3639.3639.3	controllerType=0 controllerNumber=1 scan=3639	16.2344
01651:3	66	K.HTAEYAAN[+2190.793]ITK.S	HexNAc(6)Hex(6)	N[+2191]	1137.14	3	3409.39	3409.4	0	-3.8	317	Specific	207.79	89.93	89.93	2.15	5	>sp|Q07075|AMPE_HUMAN Glutamyl aminopeptidase OS=Homo sapiens OX=9606 GN=ENPEP PE=1 SV=3	8362	20210911_zy_urine_ethcd_1.1819.1819.3	controllerType=0 controllerNumber=1 scan=1819	8.3544
08140:3	12	R.ITYSIVQTN[+3048.084]C[+57.021]SK.E	HexNAc(6)Hex(5)Fuc(1)NeuAc(3)	C[+57], N[+3048]	1487.94	3	4461.8	4461.79	0	1.9	197	Specific	208.02	100.24	100.24	2.57	26	>sp|P01042|KNG1_HUMAN Kininogen-1 OS=Homo sapiens OX=9606 GN=KNG1 PE=1 SV=2	6533	20210911_zy_urine_ethcd_1.8936.8936.3	controllerType=0 controllerNumber=1 scan=8936	39.9947
01939:3	14	R.EEQFN[+1809.666]STYR.V	HexNAc(5)Hex(4)Fuc(1)	N[+1810]	995.063	3	2983.18	2983.18	0	-2.6	173	Specific	208.03	77.55	77.55	4.15	17	>sp|P01861|IGHG4_HUMAN Immunoglobulin heavy constant gamma 4 OS=Homo sapiens OX=9606 GN=IGHG4 PE=1 SV=1	12793	20210911_zy_urine_ethcd_1.2133.2133.3	controllerType=0 controllerNumber=1 scan=2133	9.6719
02455:3	21	K.SN[+3372.190]SSMHITDC[+57.021]R.L	HexNAc(6)Hex(7)Fuc(1)NeuAc(3)	C[+57], N[+3372]	1560.58	3	4679.73	4679.74	0	-0.9	103	Specific	208.04	64.58	64.58	2.85	25	>sp|P07998|RNAS1_HUMAN Ribonuclease pancreatic OS=Homo sapiens OX=9606 GN=RNASE1 PE=1 SV=4	14690	20210911_zy_urine_ethcd_1.2697.2697.3	controllerType=0 controllerNumber=1 scan=2697	12.0515
01080:3	21	R.LTN[+2350.830]GSR.Y	HexNAc(4)Hex(5)Fuc(1)NeuAc(2)	N[+2351]	1000.06	3	2998.17	2998.18	0	-2.2	114	Specific	208.06	12.38	12.38	0.88	25	>sp|P07998|RNAS1_HUMAN Ribonuclease pancreatic OS=Homo sapiens OX=9606 GN=RNASE1 PE=1 SV=4	14690	20210911_zy_urine_ethcd_1.1193.1193.3	controllerType=0 controllerNumber=1 scan=1193	5.5516
08640:4	1	R.C[+57.021]NTAAPMWLN[+1913.677]GTHPSSDEGIVSR.K	HexNAc(4)Hex(5)NeuAc(1)	C[+57], N[+1914]	1104.21	4	4413.8	4413.81	0	-2.9	223	Specific	208.19	161.35	161.35	5.44	49	>sp|P07911|UROM_HUMAN Uromodulin OS=Homo sapiens OX=9606 GN=UMOD PE=1 SV=1	16609	20210911_zy_urine_ethcd_1.9483.9483.4	controllerType=0 controllerNumber=1 scan=9483	42.4136
12484:3	95	K.GVPQPN[+2569.905]ITWLKR.G	HexNAc(5)Hex(6)NeuAc(2)	N[+2570]	1326.91	3	3978.71	3978.71	0	0.2	1325	Specific	208.35	36.74	36.74	0.44	13	>sp|P82987|ATL3_HUMAN ADAMTS-like protein 3 OS=Homo sapiens OX=9606 GN=ADAMTSL3 PE=1 SV=4	20246	20210911_zy_urine_ethcd_1.13694.13694.4	controllerType=0 controllerNumber=1 scan=13694	61.2338
12435:3	4	R.QNQC[+57.021]FYN[+3155.132]SSYLNVQR.E	HexNAc(7)Hex(8)Fuc(1)NeuAc(1)	C[+57], N[+3155]	1692.33	3	5074.97	5076	-1	-3.8	87	Specific	208.53	118.87	118.87	5.05	34	>sp|P19652|A1AG2_HUMAN Alpha-1-acid glycoprotein 2 OS=Homo sapiens OX=9606 GN=ORM2 PE=1 SV=2	4531	20210911_zy_urine_ethcd_1.13640.13640.3	controllerType=0 controllerNumber=1 scan=13640	61.0007
02441:2	10	R.EEQFN[+1241.454]STFR.V	HexNAc(3)Hex(3)Fuc(1)	N[+1241]	1199.99	2	2398.97	2398.98	0	-2.5	172	Specific	208.92	68.72	68.72	4.03	27	>sp|P01859|IGHG2_HUMAN Immunoglobulin heavy constant gamma 2 OS=Homo sapiens OX=9606 GN=IGHG2 PE=1 SV=2	2858	20210911_zy_urine_ethcd_1.2681.2681.3	controllerType=0 controllerNumber=1 scan=2681	11.9865
08567:3	84	R.IN[+2756.989]NSLSELR.R	HexNAc(6)Hex(5)Fuc(1)NeuAc(2)	N[+2757]	1268.18	3	3802.54	3802.55	0	-3.4	65	Specific	209.11	7.99	7.99	0.73	10	>sp|Q9Y5J3|HEY1_HUMAN Hairy/enhancer-of-split related with YRPW motif protein 1 OS=Homo sapiens OX=9606 GN=HEY1 PE=1 SV=1	12003	20210911_zy_urine_ethcd_1.9403.9403.3	controllerType=0 controllerNumber=1 scan=9403	42.0488
04243:3	12	R.ITYSIVQTN[+1913.677]C[+57.021]SK.E	HexNAc(4)Hex(5)NeuAc(1)	C[+57], N[+1914]	1109.8	3	3327.37	3327.38	0	-3.3	197	Specific	209.52	109.05	109.05	3.29	26	>sp|P01042|KNG1_HUMAN Kininogen-1 OS=Homo sapiens OX=9606 GN=KNG1 PE=1 SV=2	6533	20210911_zy_urine_ethcd_1.4661.4661.3	controllerType=0 controllerNumber=1 scan=4661	20.8636
10708:3	1	R.C[+57.021]NTAAPMWLN[+2245.799]GTHPSSDEGIVSR.K	HexNAc(5)Hex(4)NeuAc(2)	C[+57], N[+2246]	1582.64	3	4745.92	4745.93	0	-3.1	223	Specific	209.6	92.7	92.7	5.37	49	>sp|P07911|UROM_HUMAN Uromodulin OS=Homo sapiens OX=9606 GN=UMOD PE=1 SV=1	16609	20210911_zy_urine_ethcd_1.11748.11748.3	controllerType=0 controllerNumber=1 scan=11748	52.5336
05989:3	3	K.EHEGAIYPDN[+2861.000]TTDFQR.A	HexNAc(5)Hex(6)NeuAc(3)	N[+2861]	1585.29	3	4753.84	4753.84	0	0.6	129	Specific	209.78	125.61	125.61	3.35	26	>sp|P00450|CERU_HUMAN Ceruloplasmin OS=Homo sapiens OX=9606 GN=CP PE=1 SV=1	460	20210911_zy_urine_ethcd_1.6577.6577.3	controllerType=0 controllerNumber=1 scan=6577	29.496
09709:3	7	R.ADGTVNQIEGEATPVN[+2278.809]LTEPAK.L	HexNAc(5)Hex(6)NeuAc(1)	N[+2279]	1511.65	3	4532.92	4532.93	0	-1.3	83	Specific	209.89	124.06	124.06	5.17	25	>sp|P05090|APOD_HUMAN Apolipoprotein D OS=Homo sapiens OX=9606 GN=APOD PE=1 SV=1	120	20210911_zy_urine_ethcd_1.10655.10655.3	controllerType=0 controllerNumber=1 scan=10655	47.6959
02477:2	10	R.EEQFN[+1971.719]STFR.V	HexNAc(5)Hex(5)Fuc(1)	N[+1972]	1565.12	2	3129.24	3129.24	0	0.4	172	Specific	210.55	59.96	59.96	2.6	27	>sp|P01859|IGHG2_HUMAN Immunoglobulin heavy constant gamma 2 OS=Homo sapiens OX=9606 GN=IGHG2 PE=1 SV=2	2858	20210911_zy_urine_ethcd_1.2721.2721.2	controllerType=0 controllerNumber=1 scan=2721	12.1596
13736:3	2	R.QDQC[+57.021]IYN[+2715.963]TTYLNVQR.E	HexNAc(5)Hex(6)Fuc(1)NeuAc(2)	C[+57], N[+2716]	1544.29	3	4630.85	4631.86	-1	-1	87	Specific	210.7	95.9	95.9	4.81	53	>sp|P02763|A1AG1_HUMAN Alpha-1-acid glycoprotein 1 OS=Homo sapiens OX=9606 GN=ORM1 PE=1 SV=1	2208	20210911_zy_urine_ethcd_1.15063.15063.3	controllerType=0 controllerNumber=1 scan=15063	67.2654
07673:3	17	R.LAGKPTHVN[+2059.735]VSVVM[+15.995]AEVDGTC[+57.021].Y	HexNAc(4)Hex(5)Fuc(1)NeuAc(1)	C[+57], M[+16], N[+2060]	1420.27	3	4258.8	4259.81	-1	-1.6	332	CRagged	211.17	90.64	59.72	5.06	16	>sp|P01876|IGHA1_HUMAN Immunoglobulin heavy constant alpha 1 OS=Homo sapiens OX=9606 GN=IGHA1 PE=1 SV=2	9091	20210911_zy_urine_ethcd_1.8425.8425.3	controllerType=0 controllerNumber=1 scan=8425	37.7233
01093:3	21	R.LTN[+2715.963]GSR.Y	HexNAc(5)Hex(6)Fuc(1)NeuAc(2)	N[+2716]	1121.77	3	3363.3	3363.31	0	-4.2	114	Specific	211.22	11.27	11.27	0.84	25	>sp|P07998|RNAS1_HUMAN Ribonuclease pancreatic OS=Homo sapiens OX=9606 GN=RNASE1 PE=1 SV=4	14690	20210911_zy_urine_ethcd_1.1207.1207.3	controllerType=0 controllerNumber=1 scan=1207	5.6144
01152:3	21	R.LTN[+2715.963]GSR.Y	HexNAc(5)Hex(6)Fuc(1)NeuAc(2)	N[+2716]	1121.77	3	3363.3	3363.31	0	-1.5	114	Specific	211.53	9.65	9.65	0.84	25	>sp|P07998|RNAS1_HUMAN Ribonuclease pancreatic OS=Homo sapiens OX=9606 GN=RNASE1 PE=1 SV=4	14690	20210911_zy_urine_ethcd_1.1272.1272.3	controllerType=0 controllerNumber=1 scan=1272	5.9179
02706:3	2	R.EN[+3372.190]GTISR.Y	HexNAc(6)Hex(7)Fuc(1)NeuAc(3)	N[+3372]	1383.54	3	4148.6	4148.58	0	4	102	Specific	211.55	12.97	12.97	0.11	53	>sp|P02763|A1AG1_HUMAN Alpha-1-acid glycoprotein 1 OS=Homo sapiens OX=9606 GN=ORM1 PE=1 SV=1	2208	20210911_zy_urine_ethcd_1.2973.2973.3	controllerType=0 controllerNumber=1 scan=2973	13.2662
12277:3	78	K.AFN[+2350.830]STLPTMAQMEK.A	HexNAc(4)Hex(5)Fuc(1)NeuAc(2)	N[+2351]	1307.19	3	3919.57	3919.58	0	-2.4	55	Specific	211.71	90.44	90.44	2.86	3	>sp|P16070|CD44_HUMAN CD44 antigen OS=Homo sapiens OX=9606 GN=CD44 PE=1 SV=3	1144	20210911_zy_urine_ethcd_1.13467.13467.3	controllerType=0 controllerNumber=1 scan=13467	60.2396
10107:3	4	R.QNQC[+57.021]FYN[+2586.920]SSYLNVQR.E	HexNAc(5)Hex(7)Fuc(1)NeuAc(1)	C[+57], N[+2587]	1503.27	3	4507.79	4507.79	0	1.2	87	Specific	212.03	108.92	108.92	4.2	34	>sp|P19652|A1AG2_HUMAN Alpha-1-acid glycoprotein 2 OS=Homo sapiens OX=9606 GN=ORM2 PE=1 SV=2	4531	20210911_zy_urine_ethcd_1.11091.11091.3	controllerType=0 controllerNumber=1 scan=11091	49.6279
09647:3	8	K.DIVEYYNDSN[+2350.793]GSHVLQGR.F	HexNAc(2)Hex(12)	N[+2351]	1473.26	3	4417.76	4416.75	1	1	103	Specific	212.15	80.23	2.32	4.13	33	>sp|P25311|ZA2G_HUMAN Zinc-alpha-2-glycoprotein OS=Homo sapiens OX=9606 GN=AZGP1 PE=1 SV=2	18783	20210911_zy_urine_ethcd_1.10587.10587.3	controllerType=0 controllerNumber=1 scan=10587	47.3831
04032:3	27	K.FLN[+2204.772]ESYK.H	HexNAc(4)Hex(5)NeuAc(2)	N[+2205]	1035.74	3	3105.21	3105.22	0	-2.2	92	Specific	212.24	29.8	29.8	1.91	13	>sp|P15309|PPAP_HUMAN Prostatic acid phosphatase OS=Homo sapiens OX=9606 GN=ACPP PE=1 SV=3	14195	20210911_zy_urine_ethcd_1.4430.4430.3	controllerType=0 controllerNumber=1 scan=4430	19.8184
10280:3	9	K.C[+57.021]GLVPVLAENYN[+1913.677]K.S	HexNAc(4)Hex(5)NeuAc(1)	C[+57], N[+1914]	1130.81	3	3390.42	3390.43	0	-2.2	421	Specific	212.28	92.1	92.1	4.31	20	>sp|P02787|TRFE_HUMAN Serotransferrin OS=Homo sapiens OX=9606 GN=TF PE=1 SV=3	18223	20210911_zy_urine_ethcd_1.11280.11280.3	controllerType=0 controllerNumber=1 scan=11280	50.4632
08173:3	2	R.QDQC[+57.021]IYN[+2789.999]TTYLNVQR.E	HexNAc(6)Hex(7)Fuc(1)NeuAc(1)	C[+57], N[+2790]	1569.3	3	4705.89	4705.9	0	-1	87	Specific	212.53	89.38	89.38	4.65	53	>sp|P02763|A1AG1_HUMAN Alpha-1-acid glycoprotein 1 OS=Homo sapiens OX=9606 GN=ORM1 PE=1 SV=1	2208	20210911_zy_urine_ethcd_1.8972.8972.3	controllerType=0 controllerNumber=1 scan=8972	40.1543
04929:3	45	R.ISM[+15.995]C[+57.021]QNLGYN[+2350.830]VTK.M	HexNAc(4)Hex(5)Fuc(1)NeuAc(2)	C[+57], M[+16], N[+2351]	1298.86	3	3894.55	3894.55	0	-0.7	50	Specific	212.7	87.55	87.55	4.01	5	>sp|Q9ULV1|FZD4_HUMAN Frizzled-4 OS=Homo sapiens OX=9606 GN=FZD4 PE=1 SV=2	20281	20210911_zy_urine_ethcd_1.5415.5415.3	controllerType=0 controllerNumber=1 scan=5415	24.2757
12302:4	2	R.QDQC[+57.021]IYN[+3737.322]TTYLNVQR.E	HexNAc(7)Hex(8)Fuc(1)NeuAc(3)	C[+57], N[+3737]	1414.05	4	5653.2	5653.22	0	-4	87	Specific	213.19	85.85	85.85	5.19	53	>sp|P02763|A1AG1_HUMAN Alpha-1-acid glycoprotein 1 OS=Homo sapiens OX=9606 GN=ORM1 PE=1 SV=1	2208	20210911_zy_urine_ethcd_1.13494.13494.4	controllerType=0 controllerNumber=1 scan=13494	60.3552
05457:3	8	K.DIVEYYN[+1897.682]DSN[+876.322]GSHVLQGR.F	HexNAc(4)Hex(4)Fuc(1)NeuAc(1),HexNAc(2)Hex(2)Fuc(1)	N[+876][+1898]	1614	3	4839.97	4839.96	0	2.4	103	Specific	213.56	110.91	2.3	4.11	33	>sp|P25311|ZA2G_HUMAN Zinc-alpha-2-glycoprotein OS=Homo sapiens OX=9606 GN=AZGP1 PE=1 SV=2	18783	20210911_zy_urine_ethcd_1.5994.5994.3	controllerType=0 controllerNumber=1 scan=5994	26.8727
14900:3	3	K.AGLQAFFQVQEC[+57.021]N[+3007.058]K.S	HexNAc(5)Hex(6)Fuc(1)NeuAc(3)	C[+57], N[+3007]	1549.95	3	4647.83	4646.85	1	-4	346	Specific	214.2	100.88	100.88	4.21	26	>sp|P00450|CERU_HUMAN Ceruloplasmin OS=Homo sapiens OX=9606 GN=CP PE=1 SV=1	460	20210911_zy_urine_ethcd_1.16335.16335.3	controllerType=0 controllerNumber=1 scan=16335	72.8188
01164:3	21	R.LTN[+3081.095]GSR.Y	HexNAc(6)Hex(7)Fuc(1)NeuAc(2)	N[+3081]	1243.48	3	3728.44	3728.44	0	-1.4	114	Specific	214.26	6.36	6.36	0.84	25	>sp|P07998|RNAS1_HUMAN Ribonuclease pancreatic OS=Homo sapiens OX=9606 GN=RNASE1 PE=1 SV=4	14690	20210911_zy_urine_ethcd_1.1285.1285.3	controllerType=0 controllerNumber=1 scan=1285	5.9784
14647:3	2	R.QDQC[+57.021]IYN[+3210.137]TTYLNVQR.E	HexNAc(6)Hex(6)Fuc(1)NeuAc(3)	C[+57], N[+3210]	1709.34	3	5126	5126.03	0	-5.7	87	Specific	214.34	85.75	85.75	4.66	53	>sp|P02763|A1AG1_HUMAN Alpha-1-acid glycoprotein 1 OS=Homo sapiens OX=9606 GN=ORM1 PE=1 SV=1	2208	20210911_zy_urine_ethcd_1.16058.16058.3	controllerType=0 controllerNumber=1 scan=16058	71.6093
06405:3	45	R.ISMC[+57.021]QNLGYN[+2407.852]VTK.M	HexNAc(5)Hex(5)NeuAc(2)	C[+57], N[+2408]	1312.53	3	3935.58	3935.58	0	0.3	50	Specific	214.57	98.31	98.31	2.87	5	>sp|Q9ULV1|FZD4_HUMAN Frizzled-4 OS=Homo sapiens OX=9606 GN=FZD4 PE=1 SV=2	20281	20210911_zy_urine_ethcd_1.7033.7033.3	controllerType=0 controllerNumber=1 scan=7033	31.5226
01528:3	2	R.EN[+2350.830]GTISR.Y	HexNAc(4)Hex(5)Fuc(1)NeuAc(2)	N[+2351]	1043.08	3	3127.21	3127.22	0	-2.7	102	Specific	214.65	30.68	30.68	1.87	53	>sp|P02763|A1AG1_HUMAN Alpha-1-acid glycoprotein 1 OS=Homo sapiens OX=9606 GN=ORM1 PE=1 SV=1	2208	20210911_zy_urine_ethcd_1.1685.1685.3	controllerType=0 controllerNumber=1 scan=1685	7.7855
07487:3	46	R.GGYIFPTQQPN[+2627.947]TTTLASR.K	HexNAc(6)Hex(6)Fuc(1)NeuAc(1)	N[+2628]	1527.65	3	4580.95	4579.93	1	2.8	817	Specific	215.07	118.18	118.18	3.98	5	>sp|O43451|MGA_HUMAN Maltase-glucoamylase, intestinal OS=Homo sapiens OX=9606 GN=MGAM PE=1 SV=5	7929	20210911_zy_urine_ethcd_1.8221.8221.3	controllerType=0 controllerNumber=1 scan=8221	36.8067
04348:2	136	R.N[+1702.581]VSTNVFFK.Q	HexNAc(2)Hex(8)	N[+1703]	1379.57	2	2758.13	2758.13	0	-0.5	337	Specific	215.17	129.46	129.46	0.93	6	>sp|Q6YHK3|CD109_HUMAN CD109 antigen OS=Homo sapiens OX=9606 GN=CD109 PE=1 SV=2	8627	20210911_zy_urine_ethcd_1.4777.4777.2	controllerType=0 controllerNumber=1 scan=4777	21.389
01417:3	2	R.EN[+2715.963]GTISR.Y	HexNAc(5)Hex(6)Fuc(1)NeuAc(2)	N[+2716]	1164.79	3	3492.35	3492.35	0	-1	102	Specific	215.33	14.96	14.96	0.9	53	>sp|P02763|A1AG1_HUMAN Alpha-1-acid glycoprotein 1 OS=Homo sapiens OX=9606 GN=ORM1 PE=1 SV=1	2208	20210911_zy_urine_ethcd_1.1563.1563.3	controllerType=0 controllerNumber=1 scan=1563	7.256
06149:3	6	R.MAGKPTHIN[+2059.735]VSVVM[+15.995]AEADGTC[+57.021].Y	HexNAc(4)Hex(5)Fuc(1)NeuAc(1)	C[+57], M[+16], N[+2060]	1421.92	3	4263.74	4263.75	0	-1.5	319	CRagged	215.41	56.41	56.41	4.96	32	>sp|P01877|IGHA2_HUMAN Immunoglobulin heavy constant alpha 2 OS=Homo sapiens OX=9606 GN=IGHA2 PE=1 SV=4	10403	20210911_zy_urine_ethcd_1.6753.6753.3	controllerType=0 controllerNumber=1 scan=6753	30.2879
06451:3	16	K.TAVN[+1768.640]C[+57.021]SSDFDAC[+57.021]LITK.A	HexNAc(4)Hex(5)Fuc(1)	C[+57]*2, N[+1769]	1190.82	3	3570.43	3570.45	0	-5.1	40	Specific	215.44	102.15	102.15	4.2	11	>sp|P13987|CD59_HUMAN CD59 glycoprotein OS=Homo sapiens OX=9606 GN=CD59 PE=1 SV=1	1116	20210911_zy_urine_ethcd_1.7083.7083.3	controllerType=0 controllerNumber=1 scan=7083	31.7453
01342:2	2	R.NEEYN[+1913.677]K.S	HexNAc(4)Hex(5)NeuAc(1)	N[+1914]	1355.51	2	2710.01	2710.02	0	-3.6	52	Specific	215.52	58.64	58.64	1.92	53	>sp|P02763|A1AG1_HUMAN Alpha-1-acid glycoprotein 1 OS=Homo sapiens OX=9606 GN=ORM1 PE=1 SV=1	2208	20210911_zy_urine_ethcd_1.1481.1481.2	controllerType=0 controllerNumber=1 scan=1481	6.8783
00933:3	21	R.N[+2424.867]MTQGR.C	HexNAc(5)Hex(6)Fuc(1)NeuAc(1)	N[+2425]	1044.4	3	3131.19	3131.2	0	-3.4	62	Specific	215.62	52.67	52.67	1.83	25	>sp|P07998|RNAS1_HUMAN Ribonuclease pancreatic OS=Homo sapiens OX=9606 GN=RNASE1 PE=1 SV=4	14690	20210911_zy_urine_ethcd_1.1032.1032.3	controllerType=0 controllerNumber=1 scan=1032	4.8415
02849:3	2	R.EN[+3517.228]GTISR.Y	HexNAc(6)Hex(7)NeuAc(4)	N[+3517]	1431.54	3	4292.61	4293.62	-1	-1.3	102	Specific	216.03	21.21	21.21	1.2	53	>sp|P02763|A1AG1_HUMAN Alpha-1-acid glycoprotein 1 OS=Homo sapiens OX=9606 GN=ORM1 PE=1 SV=1	2208	20210911_zy_urine_ethcd_1.3130.3130.3	controllerType=0 controllerNumber=1 scan=3130	13.9616
11518:3	3	K.EN[+2059.735]LTAPGSDSAVFFEQGTTR.I	HexNAc(4)Hex(5)Fuc(1)NeuAc(1)	N[+2060]	1396.25	3	4186.74	4186.73	0	2.2	396	Specific	216.21	87.8	87.8	2.93	26	>sp|P00450|CERU_HUMAN Ceruloplasmin OS=Homo sapiens OX=9606 GN=CP PE=1 SV=1	460	20210911_zy_urine_ethcd_1.12636.12636.3	controllerType=0 controllerNumber=1 scan=12636	56.4991
06392:3	41	K.AEFN[+2174.798]ITLIHPK.D	HexNAc(6)Hex(5)Fuc(1)	N[+2175]	1153.17	3	3457.51	3457.51	0	-1.7	231	Specific	216.35	104.91	104.91	3.09	8	>sp|P15144|AMPN_HUMAN Aminopeptidase N OS=Homo sapiens OX=9606 GN=ANPEP PE=1 SV=4	1209	20210911_zy_urine_ethcd_1.7019.7019.3	controllerType=0 controllerNumber=1 scan=7019	31.4606
07607:3	144	K.FLSSSPHLPPSSYFN[+2116.756]ASGR.A	HexNAc(5)Hex(5)NeuAc(1)	N[+2117]	1390.26	3	4168.76	4167.75	1	0	429	Specific	216.92	125.48	125.48	1.28	1	>sp|O14773|TPP1_HUMAN Tripeptidyl-peptidase 1 OS=Homo sapiens OX=9606 GN=TPP1 PE=1 SV=2	13177	20210911_zy_urine_ethcd_1.8352.8352.3	controllerType=0 controllerNumber=1 scan=8352	37.3898
00923:2	21	R.N[+1403.507]MTQGR.C	HexNAc(3)Hex(4)Fuc(1)	N[+1404]	1055.42	2	2109.83	2109.84	0	-4.1	62	Specific	216.93	106.8	106.8	2.62	25	>sp|P07998|RNAS1_HUMAN Ribonuclease pancreatic OS=Homo sapiens OX=9606 GN=RNASE1 PE=1 SV=4	14690	20210911_zy_urine_ethcd_1.1021.1021.2	controllerType=0 controllerNumber=1 scan=1021	4.7929
05562:3	51	R.FSDGLESN[+1864.634]SSTQFEVK.K	HexNAc(2)Hex(9)	N[+1865]	1213.82	3	3639.44	3639.45	0	-0.7	219	Specific	217.24	146.68	146.68	4.19	2	>sp|P0C0L5|CO4B_HUMAN Complement C4-B OS=Homo sapiens OX=9606 GN=C4B PE=1 SV=2	4060	20210911_zy_urine_ethcd_1.6109.6109.3	controllerType=0 controllerNumber=1 scan=6109	27.3868
01769:3	22	R.N[+1663.608]GSNSNSPLLGK.Y	HexNAc(5)Hex(4)	N[+1664]	951.073	3	2851.2	2851.21	0	-2.2	3457	Specific	217.26	107.08	107.08	4.11	16	>sp|O60494|CUBN_HUMAN Cubilin OS=Homo sapiens OX=9606 GN=CUBN PE=1 SV=5	6499	20210911_zy_urine_ethcd_1.1948.1948.3	controllerType=0 controllerNumber=1 scan=1948	8.9077
04237:3	32	R.N[+2789.999]GSQAFVHWQEPR.A	HexNAc(6)Hex(7)Fuc(1)NeuAc(1)	N[+2790]	1449.25	3	4345.73	4345.74	0	-1.9	345	Specific	217.41	56.55	56.55	4.1	7	>sp|P30530|UFO_HUMAN Tyrosine-protein kinase receptor UFO OS=Homo sapiens OX=9606 GN=AXL PE=1 SV=4	18964	20210911_zy_urine_ethcd_1.4655.4655.3	controllerType=0 controllerNumber=1 scan=4655	20.8354
07269:4	19	K.NLFLN[+3517.228]HSEN[+1694.603]ATAK.D	HexNAc(6)Hex(7)NeuAc(4),HexNAc(3)Hex(4)Fuc(1)NeuAc(1)	N[+1695][+3517]	1668.15	4	6669.56	6670.56	-1	0.5	203	Specific	217.43	93.25	0	2.98	20	>sp|P00738|HPT_HUMAN Haptoglobin OS=Homo sapiens OX=9606 GN=HP PE=1 SV=1	3044	20210911_zy_urine_ethcd_1.7982.7982.4	controllerType=0 controllerNumber=1 scan=7982	35.7377
14765:4	9	R.QQQHLFGSN[+2861.000]VTDC[+57.021]SGNFC[+57.021]LFR.S	HexNAc(5)Hex(6)NeuAc(3)	C[+57]*2, N[+2861]	1344.54	4	5375.14	5376.12	-1	3.1	622	Specific	217.97	131.95	131.95	4.42	20	>sp|P02787|TRFE_HUMAN Serotransferrin OS=Homo sapiens OX=9606 GN=TF PE=1 SV=3	18223	20210911_zy_urine_ethcd_1.16187.16187.4	controllerType=0 controllerNumber=1 scan=16187	72.168
03292:3	32	R.SLHVPGLN[+2059.735]K.T	HexNAc(4)Hex(5)Fuc(1)NeuAc(1)	N[+2060]	1008.77	3	3024.28	3024.29	0	-3.5	191	Specific	218.6	73.92	73.92	3.3	7	>sp|P30530|UFO_HUMAN Tyrosine-protein kinase receptor UFO OS=Homo sapiens OX=9606 GN=AXL PE=1 SV=4	18964	20210911_zy_urine_ethcd_1.3616.3616.3	controllerType=0 controllerNumber=1 scan=3616	16.13
02915:3	2	R.EN[+3663.286]GTISR.Y	HexNAc(6)Hex(7)Fuc(1)NeuAc(4)	N[+3663]	1480.56	3	4439.66	4439.68	0	-3.3	102	Specific	218.67	30.42	30.42	1.82	53	>sp|P02763|A1AG1_HUMAN Alpha-1-acid glycoprotein 1 OS=Homo sapiens OX=9606 GN=ORM1 PE=1 SV=1	2208	20210911_zy_urine_ethcd_1.3202.3202.3	controllerType=0 controllerNumber=1 scan=3202	14.2881
11061:3	18	R.LAN[+2204.772]LTQGEDQYYLR.V	HexNAc(4)Hex(5)NeuAc(2)	N[+2205]	1296.87	3	3888.59	3888.61	0	-4.5	372	Specific	219.12	107.83	107.83	4.11	18	>sp|P10909|CLUS_HUMAN Clusterin OS=Homo sapiens OX=9606 GN=CLU PE=1 SV=1	6125	20210911_zy_urine_ethcd_1.12135.12135.3	controllerType=0 controllerNumber=1 scan=12135	54.2495
08689:2	113	R.N[+2350.830]GTDLGNSLTTR.P	HexNAc(4)Hex(5)Fuc(1)NeuAc(2)	N[+2351]	1800.23	2	3599.46	3599.45	0	3.5	306	Specific	219.25	14.26	14.26	0.02	7	>sp|P22891|PROZ_HUMAN Vitamin K-dependent protein Z OS=Homo sapiens OX=9606 GN=PROZ PE=1 SV=2	12998	20210911_zy_urine_ethcd_1.9536.9536.4	controllerType=0 controllerNumber=1 scan=9536	42.6515
12770:3	2	R.QDQC[+57.021]IYN[+2569.905]TTYLNVQR.E	HexNAc(5)Hex(6)NeuAc(2)	C[+57], N[+2570]	1495.93	3	4485.78	4485.8	0	-4.6	87	Specific	219.34	123.55	123.55	4.74	53	>sp|P02763|A1AG1_HUMAN Alpha-1-acid glycoprotein 1 OS=Homo sapiens OX=9606 GN=ORM1 PE=1 SV=1	2208	20210911_zy_urine_ethcd_1.14007.14007.3	controllerType=0 controllerNumber=1 scan=14007	62.6167
02897:2	26	K.IDSTGN[+1378.476]VTNELR.V	HexNAc(2)Hex(6)	N[+1378]	1349.07	2	2697.13	2697.14	0	-1.6	411	Specific	219.55	54.75	54.75	3.12	11	>sp|O75882|ATRN_HUMAN Attractin OS=Homo sapiens OX=9606 GN=ATRN PE=1 SV=2	8160	20210911_zy_urine_ethcd_1.3183.3183.2	controllerType=0 controllerNumber=1 scan=3183	14.2001
01529:3	41	K.KLN[+1825.661]YTLSQGHR.V	HexNAc(5)Hex(5)	N[+1826]	1048.12	3	3142.36	3142.37	0	-3.1	126	Specific	219.66	29.69	29.69	1.68	8	>sp|P15144|AMPN_HUMAN Aminopeptidase N OS=Homo sapiens OX=9606 GN=ANPEP PE=1 SV=4	1209	20210911_zy_urine_ethcd_1.1686.1686.3	controllerType=0 controllerNumber=1 scan=1686	7.7878
02241:2	6	K.TPLTAN[+1809.666]ITK.S	HexNAc(5)Hex(4)Fuc(1)	N[+1810]	1384.61	2	2768.22	2768.22	0	-1.5	200	Specific	220.01	59.34	59.34	5.59	32	>sp|P01877|IGHA2_HUMAN Immunoglobulin heavy constant alpha 2 OS=Homo sapiens OX=9606 GN=IGHA2 PE=1 SV=4	10403	20210911_zy_urine_ethcd_1.2463.2463.2	controllerType=0 controllerNumber=1 scan=2463	11.0474
03176:2	82	R.AN[+2059.735]YTILK.G	HexNAc(4)Hex(5)Fuc(1)NeuAc(1)	N[+2060]	1441.61	2	2882.2	2882.21	0	-1.4	391	Specific	220.08	28.49	28.49	3.09	7	>sp|Q02487|DSC2_HUMAN Desmocollin-2 OS=Homo sapiens OX=9606 GN=DSC2 PE=1 SV=1	3025	20210911_zy_urine_ethcd_1.3489.3489.3	controllerType=0 controllerNumber=1 scan=3489	15.5469
08385:3	12	K.YNSQN[+2391.857]QSNNQFVLYR.I	HexNAc(5)Hex(4)Fuc(1)NeuAc(2)	N[+2392]	1422.58	3	4265.74	4266.73	-1	1.4	44	Specific	220.3	68.59	68.59	5.88	26	>sp|P01042|KNG1_HUMAN Kininogen-1 OS=Homo sapiens OX=9606 GN=KNG1 PE=1 SV=2	6533	20210911_zy_urine_ethcd_1.9204.9204.3	controllerType=0 controllerNumber=1 scan=9204	41.1773
01131:3	15	K.N[+2116.756]NSDISSTR.G	HexNAc(5)Hex(5)NeuAc(1)	N[+2117]	1037.41	3	3110.21	3110.22	0	-2	46	Specific	220.7	59.76	59.76	5.69	12	>sp|P01871|IGHM_HUMAN Immunoglobulin heavy constant mu OS=Homo sapiens OX=9606 GN=IGHM PE=1 SV=4	10127	20210911_zy_urine_ethcd_1.1249.1249.3	controllerType=0 controllerNumber=1 scan=1249	5.8112
00914:2	21	R.N[+1897.682]MTQGR.C	HexNAc(4)Hex(4)Fuc(1)NeuAc(1)	N[+1898]	1302.51	2	2604.01	2604.01	0	-1.1	62	Specific	221.05	61.53	61.53	4.3	25	>sp|P07998|RNAS1_HUMAN Ribonuclease pancreatic OS=Homo sapiens OX=9606 GN=RNASE1 PE=1 SV=4	14690	20210911_zy_urine_ethcd_1.1011.1011.2	controllerType=0 controllerNumber=1 scan=1011	4.7469
09048:3	8	K.DIVEYYN[+2204.772]DSNGSHVLQGR.F	HexNAc(4)Hex(5)NeuAc(2)	N[+2205]	1424.25	3	4270.73	4270.73	0	-1	103	Specific	222.03	79.9	2.57	6.3	33	>sp|P25311|ZA2G_HUMAN Zinc-alpha-2-glycoprotein OS=Homo sapiens OX=9606 GN=AZGP1 PE=1 SV=2	18783	20210911_zy_urine_ethcd_1.9931.9931.3	controllerType=0 controllerNumber=1 scan=9931	44.4394
06318:3	3	K.ELHHLQEQN[+2715.963]VSNAFLDK.G	HexNAc(5)Hex(6)Fuc(1)NeuAc(2)	N[+2716]	1579.99	3	4737.94	4737.97	0	-4.7	754	Specific	222.1	94.5	94.5	6.09	26	>sp|P00450|CERU_HUMAN Ceruloplasmin OS=Homo sapiens OX=9606 GN=CP PE=1 SV=1	460	20210911_zy_urine_ethcd_1.6938.6938.3	controllerType=0 controllerNumber=1 scan=6938	31.1067
09345:3	22	R.C[+57.021]GSN[+1702.581]FTGPSGYIISPNYPK.Q	HexNAc(2)Hex(8)	C[+57], N[+1703]	1254.51	3	3761.52	3761.54	0	-4.2	2920	Specific	222.24	123.4	123.4	5.9	16	>sp|O60494|CUBN_HUMAN Cubilin OS=Homo sapiens OX=9606 GN=CUBN PE=1 SV=5	6499	20210911_zy_urine_ethcd_1.10255.10255.3	controllerType=0 controllerNumber=1 scan=10255	45.882
01844:2	2	R.NEEYN[+2204.772]K.S	HexNAc(4)Hex(5)NeuAc(2)	N[+2205]	1501.07	2	3001.12	3001.12	0	1.3	52	Specific	222.32	25.78	25.78	2.81	53	>sp|P02763|A1AG1_HUMAN Alpha-1-acid glycoprotein 1 OS=Homo sapiens OX=9606 GN=ORM1 PE=1 SV=1	2208	20210911_zy_urine_ethcd_1.2029.2029.2	controllerType=0 controllerNumber=1 scan=2029	9.2495
12516:3	78	K.AFN[+2350.830]STLPTMAQMEK.A	HexNAc(4)Hex(5)Fuc(1)NeuAc(2)	N[+2351]	1307.2	3	3919.58	3919.58	0	0.3	55	Specific	222.48	93.63	93.63	3.72	3	>sp|P16070|CD44_HUMAN CD44 antigen OS=Homo sapiens OX=9606 GN=CD44 PE=1 SV=3	1144	20210911_zy_urine_ethcd_1.13729.13729.3	controllerType=0 controllerNumber=1 scan=13729	61.3861
01921:3	2	R.NEEYN[+3007.058]K.S	HexNAc(5)Hex(6)Fuc(1)NeuAc(3)	N[+3007]	1268.47	3	3803.41	3803.41	0	1.3	52	Specific	222.53	29.48	29.48	2.68	53	>sp|P02763|A1AG1_HUMAN Alpha-1-acid glycoprotein 1 OS=Homo sapiens OX=9606 GN=ORM1 PE=1 SV=1	2208	20210911_zy_urine_ethcd_1.2113.2113.3	controllerType=0 controllerNumber=1 scan=2113	9.5895
13012:3	2	R.QDQC[+57.021]IYN[+3007.058]TTYLNVQR.E	HexNAc(5)Hex(6)Fuc(1)NeuAc(3)	C[+57], N[+3007]	1641.32	3	4921.95	4922.95	-1	-0.5	87	Specific	222.79	132.13	132.13	6.5	53	>sp|P02763|A1AG1_HUMAN Alpha-1-acid glycoprotein 1 OS=Homo sapiens OX=9606 GN=ORM1 PE=1 SV=1	2208	20210911_zy_urine_ethcd_1.14272.14272.3	controllerType=0 controllerNumber=1 scan=14272	63.7877
02284:3	14	R.EEQFN[+1913.677]STYR.V	HexNAc(4)Hex(5)NeuAc(1)	N[+1914]	1029.73	3	3087.19	3087.19	0	-2.1	173	Specific	223.01	58.91	58.91	5.69	17	>sp|P01861|IGHG4_HUMAN Immunoglobulin heavy constant gamma 4 OS=Homo sapiens OX=9606 GN=IGHG4 PE=1 SV=1	12793	20210911_zy_urine_ethcd_1.2509.2509.3	controllerType=0 controllerNumber=1 scan=2509	11.2341
12364:3	4	R.QNQC[+57.021]FYN[+2569.905]SSYLNVQR.E	HexNAc(5)Hex(6)NeuAc(2)	C[+57], N[+2570]	1497.26	3	4489.76	4490.77	-1	-1	87	Specific	223.06	90.38	90.38	6.57	34	>sp|P19652|A1AG2_HUMAN Alpha-1-acid glycoprotein 2 OS=Homo sapiens OX=9606 GN=ORM2 PE=1 SV=2	4531	20210911_zy_urine_ethcd_1.13562.13562.3	controllerType=0 controllerNumber=1 scan=13562	60.6521
05831:3	12	K.YNSQN[+2141.788]QSNNQFVLYR.I	HexNAc(6)Hex(3)Fuc(1)NeuAc(1)	N[+2142]	1339.22	3	4015.66	4016.67	-1	-1.7	44	Specific	223.26	64.85	64.85	6.85	26	>sp|P01042|KNG1_HUMAN Kininogen-1 OS=Homo sapiens OX=9606 GN=KNG1 PE=1 SV=2	6533	20210911_zy_urine_ethcd_1.6404.6404.3	controllerType=0 controllerNumber=1 scan=6404	28.7151
07405:3	96	K.HAN[+2204.772]WTLTPLK.S	HexNAc(4)Hex(5)NeuAc(2)	N[+2205]	1129.14	3	3385.41	3385.42	0	-2.8	251	Specific	223.3	96.73	96.73	3.61	1	>sp|P27169|PON1_HUMAN Serum paraoxonase/arylesterase 1 OS=Homo sapiens OX=9606 GN=PON1 PE=1 SV=3	15463	20210911_zy_urine_ethcd_1.8131.8131.3	controllerType=0 controllerNumber=1 scan=8131	36.4084
03899:3	26	R.N[+2059.735]HSC[+57.021]SEGQISIFR.Y	HexNAc(4)Hex(5)Fuc(1)NeuAc(1)	C[+57], N[+2060]	1198.81	3	3594.43	3594.44	0	-4.4	731	Specific	223.55	44.57	44.57	5.49	11	>sp|O75882|ATRN_HUMAN Attractin OS=Homo sapiens OX=9606 GN=ATRN PE=1 SV=2	8160	20210911_zy_urine_ethcd_1.4284.4284.3	controllerType=0 controllerNumber=1 scan=4284	19.1514
01679:3	18	K.KKEDALN[+3007.058]ETR.E	HexNAc(5)Hex(6)Fuc(1)NeuAc(3)	N[+3007]	1404.23	3	4210.68	4210.69	0	-3.6	80	Specific	224.08	75.47	75.47	4.68	18	>sp|P10909|CLUS_HUMAN Clusterin OS=Homo sapiens OX=9606 GN=CLU PE=1 SV=1	6125	20210911_zy_urine_ethcd_1.1849.1849.3	controllerType=0 controllerNumber=1 scan=1849	8.4849
02836:3	2	R.EN[+3517.228]GTISR.Y	HexNAc(6)Hex(7)NeuAc(4)	N[+3517]	1431.55	3	4292.62	4293.62	-1	2.4	102	Specific	224.37	28.75	28.75	3.3	53	>sp|P02763|A1AG1_HUMAN Alpha-1-acid glycoprotein 1 OS=Homo sapiens OX=9606 GN=ORM1 PE=1 SV=1	2208	20210911_zy_urine_ethcd_1.3116.3116.3	controllerType=0 controllerNumber=1 scan=3116	13.8986
04248:3	55	R.M[+15.995]DGSLNFN[+2204.772]R.T	HexNAc(4)Hex(5)NeuAc(2)	M[+16], N[+2205]	1092.08	3	3274.24	3274.25	0	-2.8	679	Specific	224.6	66.01	66.01	5.8	2	>sp|P02671|FIBA_HUMAN Fibrinogen alpha chain OS=Homo sapiens OX=9606 GN=FGA PE=1 SV=2	9171	20210911_zy_urine_ethcd_1.4667.4667.3	controllerType=0 controllerNumber=1 scan=4667	20.8878
08906:3	45	R.ISMC[+57.021]QNLGYN[+2350.830]VTK.M	HexNAc(4)Hex(5)Fuc(1)NeuAc(2)	C[+57], N[+2351]	1293.52	3	3878.55	3878.56	0	-2.4	50	Specific	224.69	74.86	74.86	5.77	5	>sp|Q9ULV1|FZD4_HUMAN Frizzled-4 OS=Homo sapiens OX=9606 GN=FZD4 PE=1 SV=2	20281	20210911_zy_urine_ethcd_1.9775.9775.3	controllerType=0 controllerNumber=1 scan=9775	43.7392
01781:3	105	R.N[+1768.640]FSEAKSENR.K	HexNAc(4)Hex(5)Fuc(1)	N[+1769]	984.067	3	2950.19	2950.19	0	-2.1	414	Specific	224.97	43.04	43.04	2.47	2	>sp|Q9UHK0|NUFP1_HUMAN Nuclear fragile X mental retardation-interacting protein 1 OS=Homo sapiens OX=9606 GN=NUFIP1 PE=1 SV=2	10076	20210911_zy_urine_ethcd_1.1961.1961.3	controllerType=0 controllerNumber=1 scan=1961	8.9644
14990:3	1	K.QDFN[+3372.190]ITDISLLEHR.L	HexNAc(6)Hex(7)Fuc(1)NeuAc(3)	N[+3372]	1691.69	3	5073.04	5073.05	0	-1.7	319	Specific	225.05	70.76	70.76	5.98	49	>sp|P07911|UROM_HUMAN Uromodulin OS=Homo sapiens OX=9606 GN=UMOD PE=1 SV=1	16609	20210911_zy_urine_ethcd_1.16434.16434.3	controllerType=0 controllerNumber=1 scan=16434	73.258
14094:3	95	K.GVPQPN[+3007.058]ITWLKR.G	HexNAc(5)Hex(6)Fuc(1)NeuAc(3)	N[+3007]	1472.63	3	4415.87	4415.86	0	1.7	1325	Specific	225.22	23.75	23.75	0.95	13	>sp|P82987|ATL3_HUMAN ADAMTS-like protein 3 OS=Homo sapiens OX=9606 GN=ADAMTSL3 PE=1 SV=4	20246	20210911_zy_urine_ethcd_1.15454.15454.4	controllerType=0 controllerNumber=1 scan=15454	68.9595
01493:3	22	K.VC[+57.021]GN[+1971.719]GTISHIK.S	HexNAc(5)Hex(5)Fuc(1)	C[+57], N[+1972]	1053.11	3	3157.31	3157.32	0	-2.8	778	Specific	225.36	101.43	101.43	4.96	16	>sp|O60494|CUBN_HUMAN Cubilin OS=Homo sapiens OX=9606 GN=CUBN PE=1 SV=5	6499	20210911_zy_urine_ethcd_1.1646.1646.3	controllerType=0 controllerNumber=1 scan=1646	7.6272
14868:3	1	R.FALLMTNC[+57.021]YATPSSN[+2350.830]ATDPLK.Y	HexNAc(4)Hex(5)Fuc(1)NeuAc(2)	C[+57], N[+2351]	1555.98	3	4665.92	4665.94	0	-3.5	499	Specific	225.41	124.45	51.4	7	49	>sp|P07911|UROM_HUMAN Uromodulin OS=Homo sapiens OX=9606 GN=UMOD PE=1 SV=1	16609	20210911_zy_urine_ethcd_1.16300.16300.3	controllerType=0 controllerNumber=1 scan=16300	72.6654
02858:2	26	K.IDSTGN[+1540.529]VTNELR.V	HexNAc(2)Hex(7)	N[+1541]	1430.1	2	2859.18	2859.19	0	-1.2	411	Specific	225.91	52.12	52.12	5.31	11	>sp|O75882|ATRN_HUMAN Attractin OS=Homo sapiens OX=9606 GN=ATRN PE=1 SV=2	8160	20210911_zy_urine_ethcd_1.3140.3140.2	controllerType=0 controllerNumber=1 scan=3140	14.0052
05519:3	11	R.YPHKPEIN[+2204.772]STTHPGADLQENFC[+57.021]R.N	HexNAc(4)Hex(5)NeuAc(2)	C[+57], N[+2205]	1639.35	3	4916.02	4916.04	0	-2.3	136	Specific	226.03	136.48	136.48	7.58	13	>sp|P00734|THRB_HUMAN Prothrombin OS=Homo sapiens OX=9606 GN=F2 PE=1 SV=2	18404	20210911_zy_urine_ethcd_1.6062.6062.3	controllerType=0 controllerNumber=1 scan=6062	27.1751
06594:3	79	R.LFN[+2204.772]VTPQDEQK.F	HexNAc(4)Hex(5)NeuAc(2)	N[+2205]	1175.15	3	3523.44	3523.44	0	0.1	100	Specific	226.35	64.91	64.91	3.26	5	>sp|O75144|ICOSL_HUMAN ICOS ligand OS=Homo sapiens OX=9606 GN=ICOSLG PE=1 SV=2	2737	20210911_zy_urine_ethcd_1.7240.7240.3	controllerType=0 controllerNumber=1 scan=7240	32.4451
13456:3	3	K.EN[+1913.677]LTAPGSDSAVFFEQGTTR.I	HexNAc(4)Hex(5)NeuAc(1)	N[+1914]	1347.9	3	4041.67	4040.68	1	-1.8	396	Specific	226.52	106.56	106.56	6.19	26	>sp|P00450|CERU_HUMAN Ceruloplasmin OS=Homo sapiens OX=9606 GN=CP PE=1 SV=1	460	20210911_zy_urine_ethcd_1.14757.14757.3	controllerType=0 controllerNumber=1 scan=14757	65.916
01847:3	8	R.FGC[+57.021]EIENN[+1971.719]R.S	HexNAc(5)Hex(5)Fuc(1)	C[+57], N[+1972]	1037.4	3	3110.2	3110.21	0	-5.8	121	Specific	226.59	60.45	60.45	5.3	33	>sp|P25311|ZA2G_HUMAN Zinc-alpha-2-glycoprotein OS=Homo sapiens OX=9606 GN=AZGP1 PE=1 SV=2	18783	20210911_zy_urine_ethcd_1.2033.2033.3	controllerType=0 controllerNumber=1 scan=2033	9.2665
00920:2	21	R.N[+1241.454]MTQGR.C	HexNAc(3)Hex(3)Fuc(1)	N[+1241]	974.395	2	1947.78	1947.78	0	-0.5	62	Specific	226.78	10.96	10.96	1.81	25	>sp|P07998|RNAS1_HUMAN Ribonuclease pancreatic OS=Homo sapiens OX=9606 GN=RNASE1 PE=1 SV=4	14690	20210911_zy_urine_ethcd_1.1017.1017.3	controllerType=0 controllerNumber=1 scan=1017	4.779
14920:3	62	R.VVGVPYQGN[+2141.788]ATALFILPSEGK.M	HexNAc(6)Hex(3)Fuc(1)NeuAc(1)	N[+2142]	1434.66	3	4301.96	4301.96	0	-0.4	254	Specific	227.15	125.82	125.82	5.38	4	>sp|P05154|IPSP_HUMAN Plasma serine protease inhibitor OS=Homo sapiens OX=9606 GN=SERPINA5 PE=1 SV=3	2042	20210911_zy_urine_ethcd_1.16357.16357.3	controllerType=0 controllerNumber=1 scan=16357	72.9168
06102:3	12	R.ITYSIVQTN[+2919.042]C[+57.021]SK.E	HexNAc(6)Hex(6)Fuc(1)NeuAc(2)	C[+57], N[+2919]	1444.92	3	4332.74	4332.75	0	-1.5	197	Specific	227.17	50.67	50.67	5.23	26	>sp|P01042|KNG1_HUMAN Kininogen-1 OS=Homo sapiens OX=9606 GN=KNG1 PE=1 SV=2	6533	20210911_zy_urine_ethcd_1.6701.6701.3	controllerType=0 controllerNumber=1 scan=6701	30.0552
03463:3	37	R.GHTLTLN[+1784.634]FTR.N	HexNAc(4)Hex(6)	N[+1785]	982.089	3	2944.25	2944.26	0	-1.6	97	Specific	227.22	133.04	133.04	5.31	13	>sp|P11279|LAMP1_HUMAN Lysosome-associated membrane glycoprotein 1 OS=Homo sapiens OX=9606 GN=LAMP1 PE=1 SV=3	4405	20210911_zy_urine_ethcd_1.3805.3805.3	controllerType=0 controllerNumber=1 scan=3805	16.9889
05291:3	30	K.LGN[+1913.677]WSAMPSC[+57.021]K.A	HexNAc(4)Hex(5)NeuAc(1)	C[+57], N[+1914]	1055.42	3	3164.24	3164.24	0	-1.1	251	Specific	227.24	110.2	110.2	5.27	7	>sp|P02749|APOH_HUMAN Beta-2-glycoprotein 1 OS=Homo sapiens OX=9606 GN=APOH PE=1 SV=3	19971	20210911_zy_urine_ethcd_1.5812.5812.3	controllerType=0 controllerNumber=1 scan=5812	26.0583
03435:3	80	R.AFGSNPN[+2204.772]LTK.V	HexNAc(4)Hex(5)NeuAc(2)	N[+2205]	1085.11	3	3253.31	3253.31	0	-2	68	Specific	227.27	79.09	79.09	4.01	3	>sp|P22792|CPN2_HUMAN Carboxypeptidase N subunit 2 OS=Homo sapiens OX=9606 GN=CPN2 PE=1 SV=3	2992	20210911_zy_urine_ethcd_1.3774.3774.3	controllerType=0 controllerNumber=1 scan=3774	16.8459
02219:3	8	R.FGC[+57.021]EIENN[+2553.910]R.S	HexNAc(5)Hex(5)Fuc(1)NeuAc(2)	C[+57], N[+2554]	1231.48	3	3692.43	3692.4	0	6	121	Specific	227.78	93.16	93.16	4.85	33	>sp|P25311|ZA2G_HUMAN Zinc-alpha-2-glycoprotein OS=Homo sapiens OX=9606 GN=AZGP1 PE=1 SV=2	18783	20210911_zy_urine_ethcd_1.2439.2439.3	controllerType=0 controllerNumber=1 scan=2439	10.9511
08193:3	12	R.ITYSIVQTN[+2861.000]C[+57.021]SK.E	HexNAc(5)Hex(6)NeuAc(3)	C[+57], N[+2861]	1425.24	3	4273.7	4274.7	-1	0.8	197	Specific	227.8	87.35	87.35	5.03	26	>sp|P01042|KNG1_HUMAN Kininogen-1 OS=Homo sapiens OX=9606 GN=KNG1 PE=1 SV=2	6533	20210911_zy_urine_ethcd_1.8994.8994.3	controllerType=0 controllerNumber=1 scan=8994	40.2546
15272:4	2	R.QDQC[+57.021]IYN[+3517.228]TTYLNVQR.E	HexNAc(6)Hex(7)NeuAc(4)	C[+57], N[+3517]	1358.79	4	5432.12	5433.12	-1	-0.1	87	Specific	228	85.32	85.32	6.48	53	>sp|P02763|A1AG1_HUMAN Alpha-1-acid glycoprotein 1 OS=Homo sapiens OX=9606 GN=ORM1 PE=1 SV=1	2208	20210911_zy_urine_ethcd_1.16742.16742.4	controllerType=0 controllerNumber=1 scan=16742	74.5935
01454:3	14	K.TKPREEQFN[+1606.587]STYR.V	HexNAc(4)Hex(4)Fuc(1)	N[+1607]	1088.14	3	3262.39	3262.4	0	-2	169	Specific	228.35	63.89	63.89	5.16	17	>sp|P01861|IGHG4_HUMAN Immunoglobulin heavy constant gamma 4 OS=Homo sapiens OX=9606 GN=IGHG4 PE=1 SV=1	12793	20210911_zy_urine_ethcd_1.1604.1604.3	controllerType=0 controllerNumber=1 scan=1604	7.4407
02050:3	10	K.PREEQFN[+1606.587]STFR.V	HexNAc(4)Hex(4)Fuc(1)	N[+1607]	1006.42	3	3017.26	3017.26	0	-2.4	170	Specific	228.72	100.32	100.32	4.64	27	>sp|P01859|IGHG2_HUMAN Immunoglobulin heavy constant gamma 2 OS=Homo sapiens OX=9606 GN=IGHG2 PE=1 SV=2	2858	20210911_zy_urine_ethcd_1.2254.2254.2	controllerType=0 controllerNumber=1 scan=2254	10.1666
12340:4	2	R.QDQC[+57.021]IYN[+3737.322]TTYLNVQR.E	HexNAc(7)Hex(8)Fuc(1)NeuAc(3)	C[+57], N[+3737]	1414.06	4	5653.22	5653.22	0	0.7	87	Specific	229.05	121.21	121.21	6.13	53	>sp|P02763|A1AG1_HUMAN Alpha-1-acid glycoprotein 1 OS=Homo sapiens OX=9606 GN=ORM1 PE=1 SV=1	2208	20210911_zy_urine_ethcd_1.13536.13536.4	controllerType=0 controllerNumber=1 scan=13536	60.5391
06039:4	40	R.QGIDFC[+57.021]PGQN[+1540.529]VSGVTTHNLEDHTK.L	HexNAc(2)Hex(7)	C[+57], N[+1541]	1049.19	4	4193.74	4194.75	-1	-2.1	414	Specific	229.42	141.3	141.3	6.89	2	>sp|P34059|GALNS_HUMAN N-acetylgalactosamine-6-sulfatase OS=Homo sapiens OX=9606 GN=GALNS PE=1 SV=1	5352	20210911_zy_urine_ethcd_1.6632.6632.4	controllerType=0 controllerNumber=1 scan=6632	29.7426
07400:3	17	R.LAGKPTHVN[+2059.735]VSVVM[+15.995]AEVDGTC[+57.021].Y	HexNAc(4)Hex(5)Fuc(1)NeuAc(1)	C[+57], M[+16], N[+2060]	1420.61	3	4259.8	4259.81	0	-1.3	332	CRagged	229.52	67.56	67.56	6.47	16	>sp|P01876|IGHA1_HUMAN Immunoglobulin heavy constant alpha 1 OS=Homo sapiens OX=9606 GN=IGHA1 PE=1 SV=2	9091	20210911_zy_urine_ethcd_1.8126.8126.3	controllerType=0 controllerNumber=1 scan=8126	36.3855
14867:3	2	R.QDQC[+57.021]IYN[+2861.000]TTYLNVQR.E	HexNAc(5)Hex(6)NeuAc(3)	C[+57], N[+2861]	1592.63	3	4775.88	4776.9	-1	-2.6	87	Specific	230.14	130.01	130.01	6.77	53	>sp|P02763|A1AG1_HUMAN Alpha-1-acid glycoprotein 1 OS=Homo sapiens OX=9606 GN=ORM1 PE=1 SV=1	2208	20210911_zy_urine_ethcd_1.16299.16299.3	controllerType=0 controllerNumber=1 scan=16299	72.6607
09659:3	7	R.ADGTVNQIEGEATPVN[+2424.867]LTEPAK.L	HexNAc(5)Hex(6)Fuc(1)NeuAc(1)	N[+2425]	1560.34	3	4679	4678.99	0	2.7	83	Specific	230.46	140.14	140.14	5.98	25	>sp|P05090|APOD_HUMAN Apolipoprotein D OS=Homo sapiens OX=9606 GN=APOD PE=1 SV=1	120	20210911_zy_urine_ethcd_1.10600.10600.3	controllerType=0 controllerNumber=1 scan=10600	47.4428
02920:3	6	K.TPLTAN[+2424.867]ITK.S	HexNAc(5)Hex(6)Fuc(1)NeuAc(1)	N[+2425]	1128.48	3	3383.41	3383.42	0	-2.8	200	Specific	230.6	79.51	79.51	5.8	32	>sp|P01877|IGHA2_HUMAN Immunoglobulin heavy constant alpha 2 OS=Homo sapiens OX=9606 GN=IGHA2 PE=1 SV=4	10403	20210911_zy_urine_ethcd_1.3208.3208.3	controllerType=0 controllerNumber=1 scan=3208	14.3125
13595:3	28	R.C[+57.021]LNWLDAQSGLASAPVSGAGN[+2350.830]HSYC[+57.021]R.N	HexNAc(4)Hex(5)Fuc(1)NeuAc(2)	C[+57]*2, N[+2351]	1714.7	3	5142.09	5142.1	0	-1.2	46	Specific	230.74	96.56	96.56	6.88	4	>sp|Q96FE7|P3IP1_HUMAN Phosphoinositide-3-kinase-interacting protein 1 OS=Homo sapiens OX=9606 GN=PIK3IP1 PE=1 SV=2	11936	20210911_zy_urine_ethcd_1.14909.14909.3	controllerType=0 controllerNumber=1 scan=14909	66.591
02373:3	10	R.EEQFN[+1768.640]STFR.V	HexNAc(4)Hex(5)Fuc(1)	N[+1769]	976.056	3	2926.15	2926.16	0	-2.4	172	Specific	230.98	113.44	113.44	5.9	27	>sp|P01859|IGHG2_HUMAN Immunoglobulin heavy constant gamma 2 OS=Homo sapiens OX=9606 GN=IGHG2 PE=1 SV=2	2858	20210911_zy_urine_ethcd_1.2607.2607.3	controllerType=0 controllerNumber=1 scan=2607	11.6715
13985:3	2	R.QDQC[+57.021]IYN[+3517.228]TTYLNVQR.E	HexNAc(6)Hex(7)NeuAc(4)	C[+57], N[+3517]	1811.71	3	5433.12	5433.12	0	0	87	Specific	231.01	95.72	95.72	6.02	53	>sp|P02763|A1AG1_HUMAN Alpha-1-acid glycoprotein 1 OS=Homo sapiens OX=9606 GN=ORM1 PE=1 SV=1	2208	20210911_zy_urine_ethcd_1.15335.15335.3	controllerType=0 controllerNumber=1 scan=15335	68.4448
09945:3	76	K.FVGTPEVN[+2350.830]QTTLYQR.Y	HexNAc(4)Hex(5)Fuc(1)NeuAc(2)	N[+2351]	1368.57	3	4103.7	4103.72	0	-5.3	46	Specific	231.65	95.57	49.55	5.02	2	>sp|P01033|TIMP1_HUMAN Metalloproteinase inhibitor 1 OS=Homo sapiens OX=9606 GN=TIMP1 PE=1 SV=1	16130	20210911_zy_urine_ethcd_1.10913.10913.3	controllerType=0 controllerNumber=1 scan=10913	48.8398
03064:3	109	R.N[+2350.830]YTLTGR.D	HexNAc(4)Hex(5)Fuc(1)NeuAc(2)	N[+2351]	1059.09	3	3175.25	3175.26	0	-1.2	754	Specific	232.41	40.36	40.36	2.13	1	>sp|P10643|CO7_HUMAN Complement component C7 OS=Homo sapiens OX=9606 GN=C7 PE=1 SV=2	4350	20210911_zy_urine_ethcd_1.3366.3366.3	controllerType=0 controllerNumber=1 scan=3366	14.9782
01062:3	21	R.LTN[+3081.095]GSR.Y	HexNAc(6)Hex(7)Fuc(1)NeuAc(2)	N[+3081]	1243.48	3	3728.43	3728.44	0	-2.8	114	Specific	232.5	19.7	19.7	1.88	25	>sp|P07998|RNAS1_HUMAN Ribonuclease pancreatic OS=Homo sapiens OX=9606 GN=RNASE1 PE=1 SV=4	14690	20210911_zy_urine_ethcd_1.1173.1173.3	controllerType=0 controllerNumber=1 scan=1173	5.4581
01296:3	23	R.N[+2204.772]LSGPDKR.L	HexNAc(4)Hex(5)NeuAc(2)	N[+2205]	1031.08	3	3091.24	3091.25	0	-2.7	500	Specific	232.53	84.47	84.47	4.77	11	>sp|Q6EMK4|VASN_HUMAN Vasorin OS=Homo sapiens OX=9606 GN=VASN PE=1 SV=1	18175	20210911_zy_urine_ethcd_1.1430.1430.3	controllerType=0 controllerNumber=1 scan=1430	6.6545
01985:3	21	K.SN[+3081.095]SSMHITDC[+57.021]R.L	HexNAc(6)Hex(7)Fuc(1)NeuAc(2)	C[+57], N[+3081]	1463.55	3	4388.64	4388.64	0	-1.2	103	Specific	232.79	105.74	105.74	5.35	25	>sp|P07998|RNAS1_HUMAN Ribonuclease pancreatic OS=Homo sapiens OX=9606 GN=RNASE1 PE=1 SV=4	14690	20210911_zy_urine_ethcd_1.2183.2183.3	controllerType=0 controllerNumber=1 scan=2183	9.8812
05510:5	11	R.YPHKPEIN[+2204.772]STTHPGADLQENFC[+57.021]R.N	HexNAc(4)Hex(5)NeuAc(2)	C[+57], N[+2205]	983.81	5	4915.02	4916.04	-1	-2.2	136	Specific	232.85	123.15	123.15	7.39	13	>sp|P00734|THRB_HUMAN Prothrombin OS=Homo sapiens OX=9606 GN=F2 PE=1 SV=2	18404	20210911_zy_urine_ethcd_1.6052.6052.5	controllerType=0 controllerNumber=1 scan=6052	27.132
01695:3	14	K.PREEQFN[+1444.534]STYR.V	HexNAc(4)Hex(3)Fuc(1)	N[+1445]	957.738	3	2871.2	2871.2	0	-2.2	171	Specific	233.16	73.78	73.78	4.48	17	>sp|P01861|IGHG4_HUMAN Immunoglobulin heavy constant gamma 4 OS=Homo sapiens OX=9606 GN=IGHG4 PE=1 SV=1	12793	20210911_zy_urine_ethcd_1.1867.1867.3	controllerType=0 controllerNumber=1 scan=1867	8.5575
08264:3	2	R.QDQC[+57.021]IYN[+2789.999]TTYLNVQR.E	HexNAc(6)Hex(7)Fuc(1)NeuAc(1)	C[+57], N[+2790]	1568.96	3	4704.87	4705.9	-1	-5.1	87	Specific	233.24	105.94	105.94	6.51	53	>sp|P02763|A1AG1_HUMAN Alpha-1-acid glycoprotein 1 OS=Homo sapiens OX=9606 GN=ORM1 PE=1 SV=1	2208	20210911_zy_urine_ethcd_1.9071.9071.3	controllerType=0 controllerNumber=1 scan=9071	40.5954
01488:2	20	R.EEQYN[+1241.454]STYR.V	HexNAc(3)Hex(3)Fuc(1)	N[+1241]	1215.98	2	2430.96	2430.97	0	-1.6	295	Specific	233.55	96.76	96.76	5.53	13	>sp|P0DOX5|IGG1_HUMAN Immunoglobulin gamma-1 heavy chain OS=Homo sapiens OX=9606 PE=1 SV=2	10252	20210911_zy_urine_ethcd_1.1641.1641.2	controllerType=0 controllerNumber=1 scan=1641	7.6044
04417:4	11	R.SRYPHKPEIN[+2262.814]STTHPGADLQENFC[+57.021]R.N	HexNAc(5)Hex(5)Fuc(1)NeuAc(1)	C[+57], N[+2263]	1304.8	4	5216.18	5217.21	-1	-5	134	Specific	233.99	194.18	194.18	6.3	13	>sp|P00734|THRB_HUMAN Prothrombin OS=Homo sapiens OX=9606 GN=F2 PE=1 SV=2	18404	20210911_zy_urine_ethcd_1.4853.4853.4	controllerType=0 controllerNumber=1 scan=4853	21.7289
07206:3	8	K.DIVEYYN[+1913.677]DSNGSHVLQGR.F	HexNAc(4)Hex(5)NeuAc(1)	N[+1914]	1327.21	3	3979.62	3979.63	0	-2.4	103	Specific	234.1	88.29	24.33	6.68	33	>sp|P25311|ZA2G_HUMAN Zinc-alpha-2-glycoprotein OS=Homo sapiens OX=9606 GN=AZGP1 PE=1 SV=2	18783	20210911_zy_urine_ethcd_1.7913.7913.3	controllerType=0 controllerNumber=1 scan=7913	35.4315
02541:3	108	K.GIYFNILENN[+2204.772]SSSK.T	HexNAc(4)Hex(5)NeuAc(2)	N[+2205]	1264.19	3	3790.56	3790.56	0	1.5	1560	Specific	234.17	21.97	21.97	2.02	8	>sp|Q86UQ4|ABCAD_HUMAN ATP-binding cassette sub-family A member 13 OS=Homo sapiens OX=9606 GN=ABCA13 PE=2 SV=3	6957	20210911_zy_urine_ethcd_1.2793.2793.3	controllerType=0 controllerNumber=1 scan=2793	12.4617
01208:3	21	R.N[+3081.095]MTQGR.C	HexNAc(6)Hex(7)Fuc(1)NeuAc(2)	N[+3081]	1263.15	3	3787.42	3787.42	0	-0.3	62	Specific	234.2	49.61	49.61	3.96	25	>sp|P07998|RNAS1_HUMAN Ribonuclease pancreatic OS=Homo sapiens OX=9606 GN=RNASE1 PE=1 SV=4	14690	20210911_zy_urine_ethcd_1.1333.1333.3	controllerType=0 controllerNumber=1 scan=1333	6.205
08706:3	29	R.SWPAVGN[+2350.830]C[+57.021]SSALR.W	HexNAc(4)Hex(5)Fuc(1)NeuAc(2)	C[+57], N[+2351]	1252.5	3	3755.5	3755.5	0	-1.1	181	Specific	234.69	103.52	103.52	5.82	8	>sp|P02790|HEMO_HUMAN Hemopexin OS=Homo sapiens OX=9606 GN=HPX PE=1 SV=2	9336	20210911_zy_urine_ethcd_1.9555.9555.3	controllerType=0 controllerNumber=1 scan=9555	42.736
05921:3	84	R.IN[+2262.814]NSLSELR.R	HexNAc(5)Hex(5)Fuc(1)NeuAc(1)	N[+2263]	1103.46	3	3308.36	3308.38	0	-5.2	65	Specific	234.72	48.18	48.18	3.91	10	>sp|Q9Y5J3|HEY1_HUMAN Hairy/enhancer-of-split related with YRPW motif protein 1 OS=Homo sapiens OX=9606 GN=HEY1 PE=1 SV=1	12003	20210911_zy_urine_ethcd_1.6503.6503.3	controllerType=0 controllerNumber=1 scan=6503	29.1653
02965:3	8	R.FGC[+57.021]EIENN[+2715.963]R.S	HexNAc(5)Hex(6)Fuc(1)NeuAc(2)	C[+57], N[+2716]	1285.49	3	3854.46	3854.46	0	-0.5	121	Specific	234.83	93.41	93.41	5.28	33	>sp|P25311|ZA2G_HUMAN Zinc-alpha-2-glycoprotein OS=Homo sapiens OX=9606 GN=AZGP1 PE=1 SV=2	18783	20210911_zy_urine_ethcd_1.3257.3257.3	controllerType=0 controllerNumber=1 scan=3257	14.5304
13023:3	9	K.C[+57.021]GLVPVLAENYN[+2204.772]K.S	HexNAc(4)Hex(5)NeuAc(2)	C[+57], N[+2205]	1227.84	3	3681.51	3681.52	0	-2.6	421	Specific	235	107.55	107.55	5.87	20	>sp|P02787|TRFE_HUMAN Serotransferrin OS=Homo sapiens OX=9606 GN=TF PE=1 SV=3	18223	20210911_zy_urine_ethcd_1.14284.14284.3	controllerType=0 controllerNumber=1 scan=14284	63.8393
07432:3	115	R.N[+2204.772]YTLWR.V	HexNAc(4)Hex(5)NeuAc(2)	N[+2205]	1019.74	3	3057.2	3057.21	0	-3.2	184	Specific	235.09	56.89	56.89	1.97	2	>sp|Q9UBR2|CATZ_HUMAN Cathepsin Z OS=Homo sapiens OX=9606 GN=CTSZ PE=1 SV=1	19942	20210911_zy_urine_ethcd_1.8161.8161.3	controllerType=0 controllerNumber=1 scan=8161	36.5389
11989:3	87	K.GSQWSDIEEFC[+57.021]N[+2204.772]R.S	HexNAc(4)Hex(5)NeuAc(2)	C[+57], N[+2205]	1278.16	3	3832.45	3832.45	0	0.1	84	Specific	235.51	82.24	82.24	3.89	1	>sp|P08174|DAF_HUMAN Complement decay-accelerating factor OS=Homo sapiens OX=9606 GN=CD55 PE=1 SV=4	3955	20210911_zy_urine_ethcd_1.13152.13152.3	controllerType=0 controllerNumber=1 scan=13152	58.8412
03109:3	10	R.EEQFN[+1897.682]STFR.V	HexNAc(4)Hex(4)Fuc(1)NeuAc(1)	N[+1898]	1019.07	3	3055.2	3055.2	0	-1.3	172	Specific	235.78	89.82	89.82	5.87	27	>sp|P01859|IGHG2_HUMAN Immunoglobulin heavy constant gamma 2 OS=Homo sapiens OX=9606 GN=IGHG2 PE=1 SV=2	2858	20210911_zy_urine_ethcd_1.3415.3415.3	controllerType=0 controllerNumber=1 scan=3415	15.2092
05703:3	26	R.N[+2204.772]HSC[+57.021]SEGQISIFR.Y	HexNAc(4)Hex(5)NeuAc(2)	C[+57], N[+2205]	1247.16	3	3739.48	3739.48	0	-0.3	731	Specific	235.81	74.31	74.31	5.2	11	>sp|O75882|ATRN_HUMAN Attractin OS=Homo sapiens OX=9606 GN=ATRN PE=1 SV=2	8160	20210911_zy_urine_ethcd_1.6263.6263.3	controllerType=0 controllerNumber=1 scan=6263	28.0785
05696:3	153	R.KMN[+2407.852]SSGC[+57.021]LSEEVGSLR.P	HexNAc(5)Hex(5)NeuAc(2)	C[+57], N[+2408]	1388.24	3	4162.69	4161.67	1	4.2	28	Specific	236.12	18.97	18.97	0.44	3	>sp|O75388|GPR32_HUMAN Probable G-protein coupled receptor 32 OS=Homo sapiens OX=9606 GN=GPR32 PE=2 SV=1	4827	20210911_zy_urine_ethcd_1.6256.6256.3	controllerType=0 controllerNumber=1 scan=6256	28.0463
03427:3	37	R.GHTLTLN[+1784.634]FTR.N	HexNAc(4)Hex(6)	N[+1785]	982.089	3	2944.25	2944.26	0	-1.3	97	Specific	236.53	114.41	114.41	5.35	13	>sp|P11279|LAMP1_HUMAN Lysosome-associated membrane glycoprotein 1 OS=Homo sapiens OX=9606 GN=LAMP1 PE=1 SV=3	4405	20210911_zy_urine_ethcd_1.3765.3765.3	controllerType=0 controllerNumber=1 scan=3765	16.8043
10555:3	34	R.IIVPLNNREN[+2059.735]ISDPTSPLR.T	HexNAc(4)Hex(5)Fuc(1)NeuAc(1)	N[+2060]	1403.31	3	4207.91	4207.91	0	-1.1	62	Specific	236.62	136.39	136.39	5.47	7	>sp|P01591|IGJ_HUMAN Immunoglobulin J chain OS=Homo sapiens OX=9606 GN=JCHAIN PE=1 SV=4	4401	20210911_zy_urine_ethcd_1.11581.11581.3	controllerType=0 controllerNumber=1 scan=11581	51.7903
04868:3	25	R.AN[+2772.984]LTTLAGTHTNIPK.L	HexNAc(6)Hex(6)NeuAc(2)	N[+2773]	1442.62	3	4325.84	4324.83	1	2	56	Specific	236.77	77.59	77.59	5.8	10	>sp|P16444|DPEP1_HUMAN Dipeptidase 1 OS=Homo sapiens OX=9606 GN=DPEP1 PE=1 SV=3	2717	20210911_zy_urine_ethcd_1.5348.5348.3	controllerType=0 controllerNumber=1 scan=5348	23.9728
05677:4	19	K.NLFLN[+2861.000]HSEN[+1548.545]ATAK.D	HexNAc(5)Hex(6)NeuAc(3),HexNAc(3)Hex(4)NeuAc(1)	N[+1549][+2861]	1467.82	4	5868.27	5868.28	0	-1	203	Specific	237.14	237.14	4.6	5.13	20	>sp|P00738|HPT_HUMAN Haptoglobin OS=Homo sapiens OX=9606 GN=HP PE=1 SV=1	3044	20210911_zy_urine_ethcd_1.6235.6235.4	controllerType=0 controllerNumber=1 scan=6235	27.9551
12474:3	4	R.QNQC[+57.021]FYN[+3007.058]SSYLNVQR.E	HexNAc(5)Hex(6)Fuc(1)NeuAc(3)	C[+57], N[+3007]	1642.98	3	4926.92	4927.92	-1	0.2	87	Specific	237.23	116.87	116.87	6	34	>sp|P19652|A1AG2_HUMAN Alpha-1-acid glycoprotein 2 OS=Homo sapiens OX=9606 GN=ORM2 PE=1 SV=2	4531	20210911_zy_urine_ethcd_1.13683.13683.3	controllerType=0 controllerNumber=1 scan=13683	61.1857
05337:3	23	R.LHEITN[+2861.000]ETFR.G	HexNAc(5)Hex(6)NeuAc(3)	N[+2861]	1374.55	3	4121.62	4120.64	1	-4.2	112	Specific	237.44	87.21	87.21	5.31	11	>sp|Q6EMK4|VASN_HUMAN Vasorin OS=Homo sapiens OX=9606 GN=VASN PE=1 SV=1	18175	20210911_zy_urine_ethcd_1.5862.5862.3	controllerType=0 controllerNumber=1 scan=5862	26.2861
03186:2	82	R.AN[+2059.735]YTILK.G	HexNAc(4)Hex(5)Fuc(1)NeuAc(1)	N[+2060]	1441.61	2	2882.2	2882.21	0	-1	391	Specific	237.45	86.39	86.39	3.72	7	>sp|Q02487|DSC2_HUMAN Desmocollin-2 OS=Homo sapiens OX=9606 GN=DSC2 PE=1 SV=1	3025	20210911_zy_urine_ethcd_1.3500.3500.2	controllerType=0 controllerNumber=1 scan=3500	15.5969
05264:3	15	R.GLTFQQN[+2116.756]ASSMC[+57.021]VPDQDTAIR.V	HexNAc(5)Hex(5)NeuAc(1)	C[+57], N[+2117]	1485.94	3	4455.82	4455.83	0	-2.6	203	Specific	237.69	152.27	33.34	6.99	12	>sp|P01871|IGHM_HUMAN Immunoglobulin heavy constant mu OS=Homo sapiens OX=9606 GN=IGHM PE=1 SV=4	10127	20210911_zy_urine_ethcd_1.5782.5782.3	controllerType=0 controllerNumber=1 scan=5782	25.9253
08377:3	2	R.QDQC[+57.021]IYN[+2278.809]TTYLNVQR.E	HexNAc(5)Hex(6)NeuAc(1)	C[+57], N[+2279]	1398.9	3	4194.69	4194.71	0	-2.8	87	Specific	237.72	84.13	84.13	6.67	53	>sp|P02763|A1AG1_HUMAN Alpha-1-acid glycoprotein 1 OS=Homo sapiens OX=9606 GN=ORM1 PE=1 SV=1	2208	20210911_zy_urine_ethcd_1.9195.9195.3	controllerType=0 controllerNumber=1 scan=9195	41.1378
05867:3	5	K.NC[+57.021]HHSGSQVPLIHC[+57.021]NLTTPSPQN[+552.217]ISNC[+57.021]R.Y	HexNAc(2)Fuc(1)	C[+57]*3, N[+552]	1260.9	3	3780.69	3780.7	0	-3.7	97	Specific	237.86	224.66	5.32	7.17	16	>sp|P10153|RNAS2_HUMAN Non-secretory ribonuclease OS=Homo sapiens OX=9606 GN=RNASE2 PE=1 SV=2	14694	20210911_zy_urine_ethcd_1.6443.6443.3	controllerType=0 controllerNumber=1 scan=6443	28.8919
03677:3	13	K.WN[+1548.545]NTGC[+57.021]QALPSQDEGPSK.A	HexNAc(3)Hex(4)NeuAc(1)	C[+57], N[+1549]	1179.81	3	3537.42	3537.42	0	0.5	498	Specific	237.94	127.9	127.9	5.72	16	>sp|P01833|PIGR_HUMAN Polymeric immunoglobulin receptor OS=Homo sapiens OX=9606 GN=PIGR PE=1 SV=4	10083	20210911_zy_urine_ethcd_1.4040.4040.3	controllerType=0 controllerNumber=1 scan=4040	18.0473
13660:3	1	R.FALLM[+15.995]TNC[+57.021]YATPSSN[+2059.735]ATDPLK.Y	HexNAc(4)Hex(5)Fuc(1)NeuAc(1)	C[+57], M[+16], N[+2060]	1464.27	3	4390.81	4390.83	0	-5.6	499	Specific	238.38	109.58	60.18	6.78	49	>sp|P07911|UROM_HUMAN Uromodulin OS=Homo sapiens OX=9606 GN=UMOD PE=1 SV=1	16609	20210911_zy_urine_ethcd_1.14980.14980.3	controllerType=0 controllerNumber=1 scan=14980	66.9041
10535:4	2	R.QDQC[+57.021]IYN[+2935.037]TTYLNVQR.E	HexNAc(6)Hex(7)NeuAc(2)	C[+57], N[+2935]	1213.49	4	4850.94	4850.93	0	1	87	Specific	238.38	120.9	120.9	6.17	53	>sp|P02763|A1AG1_HUMAN Alpha-1-acid glycoprotein 1 OS=Homo sapiens OX=9606 GN=ORM1 PE=1 SV=1	2208	20210911_zy_urine_ethcd_1.11559.11559.4	controllerType=0 controllerNumber=1 scan=11559	51.6938
02197:2	6	K.TPLTAN[+1768.640]ITK.S	HexNAc(4)Hex(5)Fuc(1)	N[+1769]	1364.1	2	2727.19	2727.2	0	-0.9	200	Specific	238.53	90.95	90.95	5.74	32	>sp|P01877|IGHA2_HUMAN Immunoglobulin heavy constant alpha 2 OS=Homo sapiens OX=9606 GN=IGHA2 PE=1 SV=4	10403	20210911_zy_urine_ethcd_1.2415.2415.3	controllerType=0 controllerNumber=1 scan=2415	10.8484
05759:3	55	R.MDGSLNFN[+2204.772]R.T	HexNAc(4)Hex(5)NeuAc(2)	N[+2205]	1086.75	3	3258.25	3258.25	0	-1.4	679	Specific	238.76	54.1	54.1	5.51	2	>sp|P02671|FIBA_HUMAN Fibrinogen alpha chain OS=Homo sapiens OX=9606 GN=FGA PE=1 SV=2	9171	20210911_zy_urine_ethcd_1.6325.6325.3	controllerType=0 controllerNumber=1 scan=6325	28.3539
05158:3	31	K.NYHQPAILN[+2424.867]SSALR.Q	HexNAc(5)Hex(6)Fuc(1)NeuAc(1)	N[+2425]	1336.57	3	4007.69	4008.7	-1	-0.8	41	Specific	238.9	102.31	102.31	5.84	5	>sp|Q16769|QPCT_HUMAN Glutaminyl-peptide cyclotransferase OS=Homo sapiens OX=9606 GN=QPCT PE=1 SV=1	12985	20210911_zy_urine_ethcd_1.5666.5666.3	controllerType=0 controllerNumber=1 scan=5666	25.406
01402:3	2	R.NEEYN[+2350.830]K.S	HexNAc(4)Hex(5)Fuc(1)NeuAc(2)	N[+2351]	1049.73	3	3147.17	3147.18	0	-2.5	52	Specific	238.96	55.94	55.94	4.45	53	>sp|P02763|A1AG1_HUMAN Alpha-1-acid glycoprotein 1 OS=Homo sapiens OX=9606 GN=ORM1 PE=1 SV=1	2208	20210911_zy_urine_ethcd_1.1547.1547.3	controllerType=0 controllerNumber=1 scan=1547	7.179
12656:2	9	K.C[+57.021]GLVPVLAENYN[+1548.545]K.S	HexNAc(3)Hex(4)NeuAc(1)	C[+57], N[+1549]	1513.15	2	3025.29	3025.3	0	-0.9	421	Specific	239.45	119.81	119.81	5.68	20	>sp|P02787|TRFE_HUMAN Serotransferrin OS=Homo sapiens OX=9606 GN=TF PE=1 SV=3	18223	20210911_zy_urine_ethcd_1.13882.13882.2	controllerType=0 controllerNumber=1 scan=13882	62.0555
01282:3	21	R.N[+2204.772]MTQGR.C	HexNAc(4)Hex(5)NeuAc(2)	N[+2205]	971.036	3	2911.09	2911.1	0	-2.7	62	Specific	240.27	68.12	68.12	4.79	25	>sp|P07998|RNAS1_HUMAN Ribonuclease pancreatic OS=Homo sapiens OX=9606 GN=RNASE1 PE=1 SV=4	14690	20210911_zy_urine_ethcd_1.1415.1415.3	controllerType=0 controllerNumber=1 scan=1415	6.5851
02484:2	10	R.EEQFN[+1241.454]STFR.V	HexNAc(3)Hex(3)Fuc(1)	N[+1241]	1199.99	2	2398.97	2398.98	0	-3.2	172	Specific	240.36	104.96	104.96	5.45	27	>sp|P01859|IGHG2_HUMAN Immunoglobulin heavy constant gamma 2 OS=Homo sapiens OX=9606 GN=IGHG2 PE=1 SV=2	2858	20210911_zy_urine_ethcd_1.2729.2729.2	controllerType=0 controllerNumber=1 scan=2729	12.1919
01125:3	4	R.EN[+2204.772]GTVSR.Y	HexNAc(4)Hex(5)NeuAc(2)	N[+2205]	989.718	3	2967.14	2967.15	0	-1.9	102	Specific	240.49	79.73	79.73	5.39	34	>sp|P19652|A1AG2_HUMAN Alpha-1-acid glycoprotein 2 OS=Homo sapiens OX=9606 GN=ORM2 PE=1 SV=2	4531	20210911_zy_urine_ethcd_1.1242.1242.3	controllerType=0 controllerNumber=1 scan=1242	5.7781
13217:3	70	K.VC[+57.021]QDC[+57.021]PLLAPLN[+2204.772]DTR.V	HexNAc(4)Hex(5)NeuAc(2)	C[+57]*2, N[+2205]	1326.2	3	3976.6	3976.62	0	-5.3	145	Specific	240.51	40.78	40.78	4.25	1	>sp|P02765|FETUA_HUMAN Alpha-2-HS-glycoprotein OS=Homo sapiens OX=9606 GN=AHSG PE=1 SV=2	4627	20210911_zy_urine_ethcd_1.14496.14496.4	controllerType=0 controllerNumber=1 scan=14496	64.775
02603:3	2	R.EN[+3517.228]GTISR.Y	HexNAc(6)Hex(7)NeuAc(4)	N[+3517]	1431.88	3	4293.61	4293.62	0	-1.1	102	Specific	240.9	30.81	30.81	4.29	53	>sp|P02763|A1AG1_HUMAN Alpha-1-acid glycoprotein 1 OS=Homo sapiens OX=9606 GN=ORM1 PE=1 SV=1	2208	20210911_zy_urine_ethcd_1.2861.2861.3	controllerType=0 controllerNumber=1 scan=2861	12.7693
02638:3	37	R.LLNINPN[+1971.719]K.T	HexNAc(5)Hex(5)Fuc(1)	N[+1972]	966.422	3	2897.25	2897.27	0	-4.9	255	Specific	240.98	128.93	128.93	5.01	13	>sp|P11279|LAMP1_HUMAN Lysosome-associated membrane glycoprotein 1 OS=Homo sapiens OX=9606 GN=LAMP1 PE=1 SV=3	4405	20210911_zy_urine_ethcd_1.2899.2899.3	controllerType=0 controllerNumber=1 scan=2899	12.9419
02415:2	10	R.EEQFN[+1241.454]STFR.V	HexNAc(3)Hex(3)Fuc(1)	N[+1241]	1199.99	2	2398.97	2398.98	0	-1.9	172	Specific	241.7	163.64	163.64	5.93	27	>sp|P01859|IGHG2_HUMAN Immunoglobulin heavy constant gamma 2 OS=Homo sapiens OX=9606 GN=IGHG2 PE=1 SV=2	2858	20210911_zy_urine_ethcd_1.2653.2653.2	controllerType=0 controllerNumber=1 scan=2653	11.8729
02854:3	13	K.WN[+1622.582]NTGC[+57.021]QALPSQDEGPSK.A	HexNAc(4)Hex(5)	C[+57], N[+1623]	1204.49	3	3611.47	3611.46	0	2.1	498	Specific	241.72	113.66	113.66	5.8	16	>sp|P01833|PIGR_HUMAN Polymeric immunoglobulin receptor OS=Homo sapiens OX=9606 GN=PIGR PE=1 SV=4	10083	20210911_zy_urine_ethcd_1.3135.3135.3	controllerType=0 controllerNumber=1 scan=3135	13.9853
07310:3	1	R.C[+57.021]NTAAPM[+15.995]WLN[+1913.677]GTHPSSDEGIVSR.K	HexNAc(4)Hex(5)NeuAc(1)	C[+57], M[+16], N[+1914]	1477.27	3	4429.8	4429.81	0	-1.7	223	Specific	241.82	148.41	95.25	7.39	49	>sp|P07911|UROM_HUMAN Uromodulin OS=Homo sapiens OX=9606 GN=UMOD PE=1 SV=1	16609	20210911_zy_urine_ethcd_1.8027.8027.3	controllerType=0 controllerNumber=1 scan=8027	35.9396
01428:3	41	K.KLN[+1622.582]YTLSQGHR.V	HexNAc(4)Hex(5)	N[+1623]	980.433	3	2939.28	2939.29	0	-1.9	126	Specific	241.98	67.65	67.65	4.98	8	>sp|P15144|AMPN_HUMAN Aminopeptidase N OS=Homo sapiens OX=9606 GN=ANPEP PE=1 SV=4	1209	20210911_zy_urine_ethcd_1.1575.1575.3	controllerType=0 controllerNumber=1 scan=1575	7.3121
12637:3	99	K.GWN[+2350.830]WTSGFNK.C	HexNAc(4)Hex(5)Fuc(1)NeuAc(2)	N[+2351]	1183.13	3	3547.38	3547.38	0	-0.9	159	Specific	242.31	86.17	86.17	3.26	2	>sp|P15328|FOLR1_HUMAN Folate receptor alpha OS=Homo sapiens OX=9606 GN=FOLR1 PE=1 SV=3	2914	20210911_zy_urine_ethcd_1.13861.13861.3	controllerType=0 controllerNumber=1 scan=13861	61.9603
01404:3	89	R.N[+1864.634]STGAYC[+57.021]GMGENK.D	HexNAc(2)Hex(9)	C[+57], N[+1865]	1085.07	3	3253.18	3253.19	0	-2.5	69	Specific	242.61	153.05	153.05	4.58	1	>sp|Q53GD3|CTL4_HUMAN Choline transporter-like protein 4 OS=Homo sapiens OX=9606 GN=SLC44A4 PE=1 SV=2	1077	20210911_zy_urine_ethcd_1.1549.1549.3	controllerType=0 controllerNumber=1 scan=1549	7.1882
12729:3	2	R.QDQC[+57.021]IYN[+2878.015]TTYLNVQR.E	HexNAc(5)Hex(7)Fuc(1)NeuAc(2)	C[+57], N[+2878]	1598.64	3	4793.91	4793.91	0	0	87	Specific	243.07	131.37	131.37	6.08	53	>sp|P02763|A1AG1_HUMAN Alpha-1-acid glycoprotein 1 OS=Homo sapiens OX=9606 GN=ORM1 PE=1 SV=1	2208	20210911_zy_urine_ethcd_1.13962.13962.3	controllerType=0 controllerNumber=1 scan=13962	62.4151
07665:3	46	R.GGYIFPTQQPN[+1971.719]TTTLASR.K	HexNAc(5)Hex(5)Fuc(1)	N[+1972]	1308.57	3	3923.7	3923.71	0	-2.2	817	Specific	243.13	122.67	122.67	6.79	5	>sp|O43451|MGA_HUMAN Maltase-glucoamylase, intestinal OS=Homo sapiens OX=9606 GN=MGAM PE=1 SV=5	7929	20210911_zy_urine_ethcd_1.8416.8416.3	controllerType=0 controllerNumber=1 scan=8416	37.6818
15339:3	2	R.QDQC[+57.021]IYN[+3517.228]TTYLNVQR.E	HexNAc(6)Hex(7)NeuAc(4)	C[+57], N[+3517]	1811.71	3	5433.12	5433.12	0	-0.7	87	Specific	243.24	82.96	82.96	6.53	53	>sp|P02763|A1AG1_HUMAN Alpha-1-acid glycoprotein 1 OS=Homo sapiens OX=9606 GN=ORM1 PE=1 SV=1	2208	20210911_zy_urine_ethcd_1.16815.16815.3	controllerType=0 controllerNumber=1 scan=16815	74.9152
14717:3	9	R.QQQHLFGSN[+2861.000]VTDC[+57.021]SGNFC[+57.021]LFR.S	HexNAc(5)Hex(6)NeuAc(3)	C[+57]*2, N[+2861]	1792.38	3	5375.12	5376.12	-1	-1	622	Specific	243.37	165.11	165.11	7.07	20	>sp|P02787|TRFE_HUMAN Serotransferrin OS=Homo sapiens OX=9606 GN=TF PE=1 SV=3	18223	20210911_zy_urine_ethcd_1.16135.16135.3	controllerType=0 controllerNumber=1 scan=16135	71.9435
01942:3	6	K.HYTN[+2075.730]SSQDVTVPC[+57.021]R.V	HexNAc(4)Hex(6)NeuAc(1)	C[+57], N[+2076]	1247.16	3	3739.47	3739.48	0	-2.2	89	Specific	243.48	90.28	90.28	5.93	32	>sp|P01877|IGHA2_HUMAN Immunoglobulin heavy constant alpha 2 OS=Homo sapiens OX=9606 GN=IGHA2 PE=1 SV=4	10403	20210911_zy_urine_ethcd_1.2136.2136.3	controllerType=0 controllerNumber=1 scan=2136	9.6843
08965:3	29	R.SWPAVGN[+2204.772]C[+57.021]SSALR.W	HexNAc(4)Hex(5)NeuAc(2)	C[+57], N[+2205]	1203.82	3	3609.43	3609.44	0	-2.2	181	Specific	243.58	59.76	59.76	5.78	8	>sp|P02790|HEMO_HUMAN Hemopexin OS=Homo sapiens OX=9606 GN=HPX PE=1 SV=2	9336	20210911_zy_urine_ethcd_1.9840.9840.3	controllerType=0 controllerNumber=1 scan=9840	44.0303
00944:2	2	R.NEEYN[+1548.545]K.S	HexNAc(3)Hex(4)NeuAc(1)	N[+1549]	1172.95	2	2344.89	2344.89	0	-2	52	Specific	243.71	74.33	74.33	5	53	>sp|P02763|A1AG1_HUMAN Alpha-1-acid glycoprotein 1 OS=Homo sapiens OX=9606 GN=ORM1 PE=1 SV=1	2208	20210911_zy_urine_ethcd_1.1044.1044.2	controllerType=0 controllerNumber=1 scan=1044	4.8933
01835:3	2	R.NEEYN[+3007.058]K.S	HexNAc(5)Hex(6)Fuc(1)NeuAc(3)	N[+3007]	1268.47	3	3803.4	3803.41	0	-1.8	52	Specific	244.02	69.56	69.56	4.92	53	>sp|P02763|A1AG1_HUMAN Alpha-1-acid glycoprotein 1 OS=Homo sapiens OX=9606 GN=ORM1 PE=1 SV=1	2208	20210911_zy_urine_ethcd_1.2020.2020.3	controllerType=0 controllerNumber=1 scan=2020	9.2156
05425:3	3	K.EHEGAIYPDN[+2350.830]TTDFQR.A	HexNAc(4)Hex(5)Fuc(1)NeuAc(2)	N[+2351]	1414.89	3	4242.66	4243.67	-1	-1.6	129	Specific	244.02	99.45	99.45	6.52	26	>sp|P00450|CERU_HUMAN Ceruloplasmin OS=Homo sapiens OX=9606 GN=CP PE=1 SV=1	460	20210911_zy_urine_ethcd_1.5959.5959.3	controllerType=0 controllerNumber=1 scan=5959	26.7199
02586:3	21	K.SN[+3007.058]SSMHITDC[+57.021]R.L	HexNAc(5)Hex(6)Fuc(1)NeuAc(3)	C[+57], N[+3007]	1438.54	3	4313.61	4314.6	-1	1.4	103	Specific	244.17	120.35	120.35	4.87	25	>sp|P07998|RNAS1_HUMAN Ribonuclease pancreatic OS=Homo sapiens OX=9606 GN=RNASE1 PE=1 SV=4	14690	20210911_zy_urine_ethcd_1.2842.2842.3	controllerType=0 controllerNumber=1 scan=2842	12.6854
05965:3	12	R.ITYSIVQTN[+2919.042]C[+57.021]SK.E	HexNAc(6)Hex(6)Fuc(1)NeuAc(2)	C[+57], N[+2919]	1444.92	3	4332.75	4332.75	0	-0.2	197	Specific	244.63	114.31	114.31	5.11	26	>sp|P01042|KNG1_HUMAN Kininogen-1 OS=Homo sapiens OX=9606 GN=KNG1 PE=1 SV=2	6533	20210911_zy_urine_ethcd_1.6551.6551.3	controllerType=0 controllerNumber=1 scan=6551	29.3772
01441:3	14	K.TKPREEQFN[+1606.587]STYR.V	HexNAc(4)Hex(4)Fuc(1)	N[+1607]	1088.13	3	3262.39	3262.4	0	-4.1	169	Specific	244.92	103.81	103.81	5.07	17	>sp|P01861|IGHG4_HUMAN Immunoglobulin heavy constant gamma 4 OS=Homo sapiens OX=9606 GN=IGHG4 PE=1 SV=1	12793	20210911_zy_urine_ethcd_1.1589.1589.3	controllerType=0 controllerNumber=1 scan=1589	7.3738
02762:3	24	K.AAIPSALDTN[+1809.666]SSK.S	HexNAc(5)Hex(4)Fuc(1)	N[+1810]	1028.78	3	3084.32	3084.32	0	-2.9	542	Specific	244.99	115.42	115.42	5.75	11	>sp|Q08380|LG3BP_HUMAN Galectin-3-binding protein OS=Homo sapiens OX=9606 GN=LGALS3BP PE=1 SV=1	4876	20210911_zy_urine_ethcd_1.3035.3035.3	controllerType=0 controllerNumber=1 scan=3035	13.5355
09693:4	69	K.TGVC[+57.021]PELQADQN[+2391.857]C[+57.021]TQEC[+57.021]VSDSEC[+57.021]ADNLK.C	HexNAc(5)Hex(4)Fuc(1)NeuAc(2)	C[+57]*4, N[+2392]	1405.79	4	5620.15	5620.18	0	-4.5	33	Specific	245.07	170.38	170.38	6.11	1	>sp|Q14508|WFDC2_HUMAN WAP four-disulfide core domain protein 2 OS=Homo sapiens OX=9606 GN=WFDC2 PE=1 SV=2	19153	20210911_zy_urine_ethcd_1.10637.10637.4	controllerType=0 controllerNumber=1 scan=10637	47.6158
04746:3	49	K.ANQQLN[+2204.772]FTEAK.E	HexNAc(4)Hex(5)NeuAc(2)	N[+2205]	1156.81	3	3468.4	3468.41	0	-0.5	48	Specific	245.57	119.12	119.12	5.18	4	>sp|Q9Y5Y7|LYVE1_HUMAN Lymphatic vessel endothelial hyaluronic acid receptor 1 OS=Homo sapiens OX=9606 GN=LYVE1 PE=1 SV=2	9455	20210911_zy_urine_ethcd_1.5214.5214.3	controllerType=0 controllerNumber=1 scan=5214	23.3659
12540:3	95	K.GVPQPN[+2569.905]ITWLKR.G	HexNAc(5)Hex(6)NeuAc(2)	N[+2570]	1326.91	3	3978.72	3978.71	0	2.2	1325	Specific	245.76	76.73	76.73	2.17	13	>sp|P82987|ATL3_HUMAN ADAMTS-like protein 3 OS=Homo sapiens OX=9606 GN=ADAMTSL3 PE=1 SV=4	20246	20210911_zy_urine_ethcd_1.13755.13755.4	controllerType=0 controllerNumber=1 scan=13755	61.5033
01507:3	2	R.EN[+2569.905]GTISR.Y	HexNAc(5)Hex(6)NeuAc(2)	N[+2570]	1116.1	3	3346.28	3346.29	0	-3	102	Specific	246.11	31.62	31.62	4.31	53	>sp|P02763|A1AG1_HUMAN Alpha-1-acid glycoprotein 1 OS=Homo sapiens OX=9606 GN=ORM1 PE=1 SV=1	2208	20210911_zy_urine_ethcd_1.1662.1662.3	controllerType=0 controllerNumber=1 scan=1662	7.6872
02676:3	24	K.AAIPSALDTN[+1768.640]SSK.S	HexNAc(4)Hex(5)Fuc(1)	N[+1769]	1015.1	3	3043.3	3043.3	0	-1.1	542	Specific	246.62	142.1	142.1	5.67	11	>sp|Q08380|LG3BP_HUMAN Galectin-3-binding protein OS=Homo sapiens OX=9606 GN=LGALS3BP PE=1 SV=1	4876	20210911_zy_urine_ethcd_1.2941.2941.3	controllerType=0 controllerNumber=1 scan=2941	13.124
04031:3	39	R.DIENFN[+2204.772]STQK.F	HexNAc(4)Hex(5)NeuAc(2)	N[+2205]	1134.11	3	3400.32	3400.33	0	-2.3	28	Specific	246.65	87.83	87.83	5.46	7	>sp|P43652|AFAM_HUMAN Afamin OS=Homo sapiens OX=9606 GN=AFM PE=1 SV=1	20367	20210911_zy_urine_ethcd_1.4429.4429.3	controllerType=0 controllerNumber=1 scan=4429	19.8132
01456:3	14	K.TKPREEQFN[+1444.534]STYR.V	HexNAc(4)Hex(3)Fuc(1)	N[+1445]	1034.12	3	3100.34	3100.35	0	-3	169	Specific	246.99	69.76	69.76	4.85	17	>sp|P01861|IGHG4_HUMAN Immunoglobulin heavy constant gamma 4 OS=Homo sapiens OX=9606 GN=IGHG4 PE=1 SV=1	12793	20210911_zy_urine_ethcd_1.1606.1606.3	controllerType=0 controllerNumber=1 scan=1606	7.4498
01111:2	15	K.N[+1694.603]NSDISSTR.G	HexNAc(3)Hex(4)Fuc(1)NeuAc(1)	N[+1695]	1344.53	2	2688.06	2688.06	0	-1.2	46	Specific	247.03	119.85	119.85	6.06	12	>sp|P01871|IGHM_HUMAN Immunoglobulin heavy constant mu OS=Homo sapiens OX=9606 GN=IGHM PE=1 SV=4	10127	20210911_zy_urine_ethcd_1.1227.1227.2	controllerType=0 controllerNumber=1 scan=1227	5.707
04596:3	12	R.ITYSIVQTN[+1606.587]C[+57.021]SK.E	HexNAc(4)Hex(4)Fuc(1)	C[+57], N[+1607]	1007.43	3	3020.28	3020.29	0	-2.1	197	Specific	247.05	168.2	168.2	5.8	26	>sp|P01042|KNG1_HUMAN Kininogen-1 OS=Homo sapiens OX=9606 GN=KNG1 PE=1 SV=2	6533	20210911_zy_urine_ethcd_1.5049.5049.3	controllerType=0 controllerNumber=1 scan=5049	22.6154
12007:3	3	K.AGLQAFFQVQEC[+57.021]N[+1913.677]K.S	HexNAc(4)Hex(5)NeuAc(1)	C[+57], N[+1914]	1185.16	3	3553.45	3553.47	0	-3.8	346	Specific	247.36	123.2	123.2	5.95	26	>sp|P00450|CERU_HUMAN Ceruloplasmin OS=Homo sapiens OX=9606 GN=CP PE=1 SV=1	460	20210911_zy_urine_ethcd_1.13172.13172.3	controllerType=0 controllerNumber=1 scan=13172	58.9289
01904:3	2	R.NEEYN[+3007.058]K.S	HexNAc(5)Hex(6)Fuc(1)NeuAc(3)	N[+3007]	1268.48	3	3803.42	3803.41	0	3.9	52	Specific	247.49	88.55	88.55	3.87	53	>sp|P02763|A1AG1_HUMAN Alpha-1-acid glycoprotein 1 OS=Homo sapiens OX=9606 GN=ORM1 PE=1 SV=1	2208	20210911_zy_urine_ethcd_1.2095.2095.3	controllerType=0 controllerNumber=1 scan=2095	9.5168
10099:3	27	R.N[+1378.476]ETQHEPYPLMLPGC[+57.021]SPSC[+57.021]PLER.F	HexNAc(2)Hex(6)	C[+57]*2, N[+1378]	1363.9	3	4089.69	4090.7	-1	-1.8	333	Specific	247.62	165.82	127.89	7.72	13	>sp|P15309|PPAP_HUMAN Prostatic acid phosphatase OS=Homo sapiens OX=9606 GN=ACPP PE=1 SV=3	14195	20210911_zy_urine_ethcd_1.11082.11082.3	controllerType=0 controllerNumber=1 scan=11082	49.5876
01412:2	42	R.YEQLQN[+1540.529]ETR.Q	HexNAc(2)Hex(7)	N[+1541]	1361.05	2	2721.08	2721.09	0	-1.7	162	Specific	247.82	111.64	111.64	6.24	4	>sp|P11117|PPAL_HUMAN Lysosomal acid phosphatase OS=Homo sapiens OX=9606 GN=ACP2 PE=1 SV=3	11545	20210911_zy_urine_ethcd_1.1558.1558.2	controllerType=0 controllerNumber=1 scan=1558	7.2278
04373:3	55	R.M[+15.995]DGSLNFN[+2204.772]R.T	HexNAc(4)Hex(5)NeuAc(2)	M[+16], N[+2205]	1092.09	3	3274.24	3274.25	0	-1.6	679	Specific	247.93	61.05	61.05	5.63	2	>sp|P02671|FIBA_HUMAN Fibrinogen alpha chain OS=Homo sapiens OX=9606 GN=FGA PE=1 SV=2	9171	20210911_zy_urine_ethcd_1.4804.4804.3	controllerType=0 controllerNumber=1 scan=4804	21.5115
02987:2	6	K.TPLTAN[+1694.603]ITK.S	HexNAc(3)Hex(4)Fuc(1)NeuAc(1)	N[+1695]	1327.08	2	2653.15	2653.16	0	-2.9	200	Specific	248.06	36.56	36.56	5.24	32	>sp|P01877|IGHA2_HUMAN Immunoglobulin heavy constant alpha 2 OS=Homo sapiens OX=9606 GN=IGHA2 PE=1 SV=4	10403	20210911_zy_urine_ethcd_1.3281.3281.2	controllerType=0 controllerNumber=1 scan=3281	14.6341
15454:4	2	R.QDQC[+57.021]IYN[+3663.286]TTYLNVQR.E	HexNAc(6)Hex(7)Fuc(1)NeuAc(4)	C[+57], N[+3663]	1395.55	4	5579.18	5579.18	0	-1.3	87	Specific	248.16	128.22	128.22	6.97	53	>sp|P02763|A1AG1_HUMAN Alpha-1-acid glycoprotein 1 OS=Homo sapiens OX=9606 GN=ORM1 PE=1 SV=1	2208	20210911_zy_urine_ethcd_1.16941.16941.4	controllerType=0 controllerNumber=1 scan=16941	75.4752
01151:3	4	R.EN[+2569.905]GTVSR.Y	HexNAc(5)Hex(6)NeuAc(2)	N[+2570]	1111.43	3	3332.27	3332.28	0	-1.6	102	Specific	248.32	74.17	74.17	5.21	34	>sp|P19652|A1AG2_HUMAN Alpha-1-acid glycoprotein 2 OS=Homo sapiens OX=9606 GN=ORM2 PE=1 SV=2	4531	20210911_zy_urine_ethcd_1.1271.1271.3	controllerType=0 controllerNumber=1 scan=1271	5.9136
01670:3	4	R.EN[+3372.190]GTVSR.Y	HexNAc(6)Hex(7)Fuc(1)NeuAc(3)	N[+3372]	1378.86	3	4134.56	4134.56	0	0.2	102	Specific	248.63	73.96	73.96	4.63	34	>sp|P19652|A1AG2_HUMAN Alpha-1-acid glycoprotein 2 OS=Homo sapiens OX=9606 GN=ORM2 PE=1 SV=2	4531	20210911_zy_urine_ethcd_1.1839.1839.3	controllerType=0 controllerNumber=1 scan=1839	8.4428
00913:2	21	R.N[+2059.735]MTQGR.C	HexNAc(4)Hex(5)Fuc(1)NeuAc(1)	N[+2060]	1383.53	2	2766.06	2766.07	0	-1.5	62	Specific	248.67	57.6	57.6	4.59	25	>sp|P07998|RNAS1_HUMAN Ribonuclease pancreatic OS=Homo sapiens OX=9606 GN=RNASE1 PE=1 SV=4	14690	20210911_zy_urine_ethcd_1.1010.1010.2	controllerType=0 controllerNumber=1 scan=1010	4.7414
10768:3	2	R.QDQC[+57.021]IYN[+2569.905]TTYLNVQR.E	HexNAc(5)Hex(6)NeuAc(2)	C[+57], N[+2570]	1495.6	3	4484.78	4485.8	-1	-3.8	87	Specific	248.83	142.54	142.54	6.89	53	>sp|P02763|A1AG1_HUMAN Alpha-1-acid glycoprotein 1 OS=Homo sapiens OX=9606 GN=ORM1 PE=1 SV=1	2208	20210911_zy_urine_ethcd_1.11814.11814.3	controllerType=0 controllerNumber=1 scan=11814	52.8245
02543:3	52	K.FVEGSHN[+1913.677]STVSLTTK.N	HexNAc(4)Hex(5)NeuAc(1)	N[+1914]	1174.16	3	3520.47	3520.48	0	-3.2	3405	Specific	248.98	55.28	55.28	6.27	2	>sp|P04114|APOB_HUMAN Apolipoprotein B-100 OS=Homo sapiens OX=9606 GN=APOB PE=1 SV=2	6234	20210911_zy_urine_ethcd_1.2795.2795.3	controllerType=0 controllerNumber=1 scan=2795	12.4713
02488:2	10	R.EEQFN[+1444.534]STFR.V	HexNAc(4)Hex(3)Fuc(1)	N[+1445]	1301.53	2	2602.05	2602.06	0	-2.3	172	Specific	249	86.67	86.67	5.82	27	>sp|P01859|IGHG2_HUMAN Immunoglobulin heavy constant gamma 2 OS=Homo sapiens OX=9606 GN=IGHG2 PE=1 SV=2	2858	20210911_zy_urine_ethcd_1.2734.2734.2	controllerType=0 controllerNumber=1 scan=2734	12.2069
01341:3	2	R.NEEYN[+2350.830]K.S	HexNAc(4)Hex(5)Fuc(1)NeuAc(2)	N[+2351]	1049.73	3	3147.17	3147.18	0	-1.9	52	Specific	249.25	74.71	74.71	4.92	53	>sp|P02763|A1AG1_HUMAN Alpha-1-acid glycoprotein 1 OS=Homo sapiens OX=9606 GN=ORM1 PE=1 SV=1	2208	20210911_zy_urine_ethcd_1.1480.1480.3	controllerType=0 controllerNumber=1 scan=1480	6.8758
02835:2	26	K.IDSTGN[+1702.581]VTNELR.V	HexNAc(2)Hex(8)	N[+1703]	1511.12	2	3021.23	3021.24	0	-2.7	411	Specific	249.57	82.85	82.85	5.85	11	>sp|O75882|ATRN_HUMAN Attractin OS=Homo sapiens OX=9606 GN=ATRN PE=1 SV=2	8160	20210911_zy_urine_ethcd_1.3115.3115.2	controllerType=0 controllerNumber=1 scan=3115	13.8925
10654:4	8	K.DIVEYYN[+2861.000]DSNGSHVLQGR.F	HexNAc(5)Hex(6)NeuAc(3)	N[+2861]	1232.24	4	4925.95	4926.96	-1	-1.6	103	Specific	249.67	143.4	29.36	6.76	33	>sp|P25311|ZA2G_HUMAN Zinc-alpha-2-glycoprotein OS=Homo sapiens OX=9606 GN=AZGP1 PE=1 SV=2	18783	20210911_zy_urine_ethcd_1.11689.11689.4	controllerType=0 controllerNumber=1 scan=11689	52.2718
01407:3	18	R.EIRHN[+2350.830]STGC[+57.021]LR.M	HexNAc(4)Hex(5)Fuc(1)NeuAc(2)	C[+57], N[+2351]	1231.83	3	3693.49	3693.49	0	-2.1	287	Specific	250.1	100.56	100.56	4.55	18	>sp|P10909|CLUS_HUMAN Clusterin OS=Homo sapiens OX=9606 GN=CLU PE=1 SV=1	6125	20210911_zy_urine_ethcd_1.1552.1552.3	controllerType=0 controllerNumber=1 scan=1552	7.2028
07722:4	17	R.LAGKPTHVN[+2350.830]VSVVM[+15.995]AEVDGTC[+57.021].Y	HexNAc(4)Hex(5)Fuc(1)NeuAc(2)	C[+57], M[+16], N[+2351]	1138.48	4	4550.9	4550.9	0	-0.7	332	CRagged	250.46	120.1	120.1	6.43	16	>sp|P01876|IGHA1_HUMAN Immunoglobulin heavy constant alpha 1 OS=Homo sapiens OX=9606 GN=IGHA1 PE=1 SV=2	9091	20210911_zy_urine_ethcd_1.8478.8478.4	controllerType=0 controllerNumber=1 scan=8478	37.9668
14622:3	33	K.SVVAPATDGGLN[+2059.735]LTSTFLR.K	HexNAc(4)Hex(5)Fuc(1)NeuAc(1)	N[+2060]	1326.92	3	3978.75	3978.76	0	-1.1	67	Specific	250.87	177.41	177.41	6.06	11	>sp|P41222|PTGDS_HUMAN Prostaglandin-H2 D-isomerase OS=Homo sapiens OX=9606 GN=PTGDS PE=1 SV=1	16974	20210911_zy_urine_ethcd_1.16031.16031.2	controllerType=0 controllerNumber=1 scan=16031	71.4884
12781:3	2	R.QDQC[+57.021]IYN[+3372.190]TTYLNVQR.E	HexNAc(6)Hex(7)Fuc(1)NeuAc(3)	C[+57], N[+3372]	1763.36	3	5288.08	5288.09	0	-1.6	87	Specific	250.92	115.13	115.13	6.73	53	>sp|P02763|A1AG1_HUMAN Alpha-1-acid glycoprotein 1 OS=Homo sapiens OX=9606 GN=ORM1 PE=1 SV=1	2208	20210911_zy_urine_ethcd_1.14019.14019.3	controllerType=0 controllerNumber=1 scan=14019	62.6681
08119:3	7	R.C[+57.021]IQAN[+2569.905]YSLMENGK.I	HexNAc(5)Hex(6)NeuAc(2)	C[+57], N[+2570]	1366.86	3	4098.58	4097.6	1	-5.3	61	Specific	250.94	96.42	73.28	5.75	25	>sp|P05090|APOD_HUMAN Apolipoprotein D OS=Homo sapiens OX=9606 GN=APOD PE=1 SV=1	120	20210911_zy_urine_ethcd_1.8913.8913.3	controllerType=0 controllerNumber=1 scan=8913	39.8946
01687:3	4	R.EN[+3372.190]GTVSR.Y	HexNAc(6)Hex(7)Fuc(1)NeuAc(3)	N[+3372]	1378.52	3	4133.55	4134.56	-1	-1.5	102	Specific	251.35	77.89	77.89	5.37	34	>sp|P19652|A1AG2_HUMAN Alpha-1-acid glycoprotein 2 OS=Homo sapiens OX=9606 GN=ORM2 PE=1 SV=2	4531	20210911_zy_urine_ethcd_1.1858.1858.3	controllerType=0 controllerNumber=1 scan=1858	8.5196
13259:3	17	R.LAGKPTHVN[+2350.830]VSVVMAEVDGTC[+57.021].Y	HexNAc(4)Hex(5)Fuc(1)NeuAc(2)	C[+57], N[+2351]	1512.3	3	4534.9	4534.91	0	-2.4	332	CRagged	251.35	152.94	44.45	6.75	16	>sp|P01876|IGHA1_HUMAN Immunoglobulin heavy constant alpha 1 OS=Homo sapiens OX=9606 GN=IGHA1 PE=1 SV=2	9091	20210911_zy_urine_ethcd_1.14542.14542.3	controllerType=0 controllerNumber=1 scan=14542	64.9739
02230:3	8	R.FGC[+57.021]EIENN[+1913.677]R.S	HexNAc(4)Hex(5)NeuAc(1)	C[+57], N[+1914]	1018.06	3	3052.17	3052.17	0	-2.1	121	Specific	251.86	109.15	109.15	6.16	33	>sp|P25311|ZA2G_HUMAN Zinc-alpha-2-glycoprotein OS=Homo sapiens OX=9606 GN=AZGP1 PE=1 SV=2	18783	20210911_zy_urine_ethcd_1.2451.2451.3	controllerType=0 controllerNumber=1 scan=2451	10.9995
02311:3	4	R.EN[+3517.228]GTVSR.Y	HexNAc(6)Hex(7)NeuAc(4)	N[+3517]	1427.2	3	4279.59	4279.6	0	-3.2	102	Specific	252.72	72.62	72.62	5.02	34	>sp|P19652|A1AG2_HUMAN Alpha-1-acid glycoprotein 2 OS=Homo sapiens OX=9606 GN=ORM2 PE=1 SV=2	4531	20210911_zy_urine_ethcd_1.2539.2539.3	controllerType=0 controllerNumber=1 scan=2539	11.3685
02699:3	2	R.EN[+4028.418]GTISR.Y	HexNAc(7)Hex(8)Fuc(1)NeuAc(4)	N[+4028]	1602.27	3	4804.8	4804.81	0	-1.8	102	Specific	252.81	31.75	31.75	4.64	53	>sp|P02763|A1AG1_HUMAN Alpha-1-acid glycoprotein 1 OS=Homo sapiens OX=9606 GN=ORM1 PE=1 SV=1	2208	20210911_zy_urine_ethcd_1.2966.2966.3	controllerType=0 controllerNumber=1 scan=2966	13.2335
12666:2	9	K.C[+57.021]GLVPVLAENYN[+1548.545]K.S	HexNAc(3)Hex(4)NeuAc(1)	C[+57], N[+1549]	1513.15	2	3025.29	3025.3	0	-0.9	421	Specific	253.09	124.35	124.35	5.76	20	>sp|P02787|TRFE_HUMAN Serotransferrin OS=Homo sapiens OX=9606 GN=TF PE=1 SV=3	18223	20210911_zy_urine_ethcd_1.13893.13893.2	controllerType=0 controllerNumber=1 scan=13893	62.1062
01603:3	4	R.EN[+3372.190]GTVSR.Y	HexNAc(6)Hex(7)Fuc(1)NeuAc(3)	N[+3372]	1378.52	3	4133.55	4134.56	-1	-3.4	102	Specific	253.11	46.38	46.38	4.94	34	>sp|P19652|A1AG2_HUMAN Alpha-1-acid glycoprotein 2 OS=Homo sapiens OX=9606 GN=ORM2 PE=1 SV=2	4531	20210911_zy_urine_ethcd_1.1766.1766.3	controllerType=0 controllerNumber=1 scan=1766	8.1263
14072:3	2	R.QDQC[+57.021]IYN[+3663.286]TTYLNVQR.E	HexNAc(6)Hex(7)Fuc(1)NeuAc(4)	C[+57], N[+3663]	1860.06	3	5578.17	5579.18	-1	-1.1	87	Specific	253.29	134.83	134.83	6.84	53	>sp|P02763|A1AG1_HUMAN Alpha-1-acid glycoprotein 1 OS=Homo sapiens OX=9606 GN=ORM1 PE=1 SV=1	2208	20210911_zy_urine_ethcd_1.15430.15430.3	controllerType=0 controllerNumber=1 scan=15430	68.854
09701:4	69	K.TGVC[+57.021]PELQADQN[+2391.857]C[+57.021]TQEC[+57.021]VSDSEC[+57.021]ADNLK.C	HexNAc(5)Hex(4)Fuc(1)NeuAc(2)	C[+57]*4, N[+2392]	1405.54	4	5619.16	5620.18	-1	-2.9	33	Specific	253.44	182	182	6.46	1	>sp|Q14508|WFDC2_HUMAN WAP four-disulfide core domain protein 2 OS=Homo sapiens OX=9606 GN=WFDC2 PE=1 SV=2	19153	20210911_zy_urine_ethcd_1.10646.10646.4	controllerType=0 controllerNumber=1 scan=10646	47.6545
02487:3	10	R.EEQFN[+1971.719]STFR.V	HexNAc(5)Hex(5)Fuc(1)	N[+1972]	1043.75	3	3129.23	3129.24	0	-2.4	172	Specific	253.55	120.65	120.65	6.03	27	>sp|P01859|IGHG2_HUMAN Immunoglobulin heavy constant gamma 2 OS=Homo sapiens OX=9606 GN=IGHG2 PE=1 SV=2	2858	20210911_zy_urine_ethcd_1.2733.2733.3	controllerType=0 controllerNumber=1 scan=2733	12.2046
02300:4	21	K.SN[+4102.455]SSMHITDC[+57.021]R.L	HexNAc(8)Hex(9)Fuc(1)NeuAc(3)	C[+57], N[+4102]	1353	4	5408.99	5410	-1	-1	103	Specific	253.56	86.92	86.92	5.57	25	>sp|P07998|RNAS1_HUMAN Ribonuclease pancreatic OS=Homo sapiens OX=9606 GN=RNASE1 PE=1 SV=4	14690	20210911_zy_urine_ethcd_1.2527.2527.4	controllerType=0 controllerNumber=1 scan=2527	11.3165
03127:3	8	R.FGC[+57.021]EIENN[+2204.772]R.S	HexNAc(4)Hex(5)NeuAc(2)	C[+57], N[+2205]	1115.09	3	3343.25	3343.27	0	-4	121	Specific	254.17	131.74	131.74	5.99	33	>sp|P25311|ZA2G_HUMAN Zinc-alpha-2-glycoprotein OS=Homo sapiens OX=9606 GN=AZGP1 PE=1 SV=2	18783	20210911_zy_urine_ethcd_1.3435.3435.3	controllerType=0 controllerNumber=1 scan=3435	15.2974
08178:3	12	R.ITYSIVQTN[+2861.000]C[+57.021]SK.E	HexNAc(5)Hex(6)NeuAc(3)	C[+57], N[+2861]	1425.9	3	4275.69	4274.7	1	-3.6	197	Specific	254.18	119.99	119.99	5.75	26	>sp|P01042|KNG1_HUMAN Kininogen-1 OS=Homo sapiens OX=9606 GN=KNG1 PE=1 SV=2	6533	20210911_zy_urine_ethcd_1.8977.8977.3	controllerType=0 controllerNumber=1 scan=8977	40.1781
03086:3	86	R.DTFVN[+2391.857]ASR.T	HexNAc(5)Hex(4)Fuc(1)NeuAc(2)	N[+2392]	1101.1	3	3301.29	3301.3	0	-2	234	Specific	254.23	104.5	104.5	4.14	2	>sp|P05155|IC1_HUMAN Plasma protease C1 inhibitor OS=Homo sapiens OX=9606 GN=SERPING1 PE=1 SV=2	9291	20210911_zy_urine_ethcd_1.3390.3390.3	controllerType=0 controllerNumber=1 scan=3390	15.0927
14288:3	9	K.C[+57.021]GLVPVLAENYN[+3007.058]K.S	HexNAc(5)Hex(6)Fuc(1)NeuAc(3)	C[+57], N[+3007]	1495.27	3	4483.8	4483.81	0	-2.8	421	Specific	254.31	144.56	144.56	5.93	20	>sp|P02787|TRFE_HUMAN Serotransferrin OS=Homo sapiens OX=9606 GN=TF PE=1 SV=3	18223	20210911_zy_urine_ethcd_1.15666.15666.3	controllerType=0 controllerNumber=1 scan=15666	69.8796
05447:3	61	R.RGVFITN[+1540.529]ETGQPLIGK.V	HexNAc(2)Hex(7)	N[+1541]	1090.83	3	3270.48	3270.49	0	-2.7	464	Specific	254.31	192.08	192.08	5.04	2	>sp|P10253|LYAG_HUMAN Lysosomal alpha-glucosidase OS=Homo sapiens OX=9606 GN=GAA PE=1 SV=4	2747	20210911_zy_urine_ethcd_1.5983.5983.3	controllerType=0 controllerNumber=1 scan=5983	26.8249
09739:3	9	K.C[+57.021]GLVPVLAENYN[+2278.809]K.S	HexNAc(5)Hex(6)NeuAc(1)	C[+57], N[+2279]	1252.52	3	3755.55	3755.56	0	-1.7	421	Specific	254.38	132.3	132.3	6.08	20	>sp|P02787|TRFE_HUMAN Serotransferrin OS=Homo sapiens OX=9606 GN=TF PE=1 SV=3	18223	20210911_zy_urine_ethcd_1.10688.10688.3	controllerType=0 controllerNumber=1 scan=10688	47.842
13962:3	2	R.QDQC[+57.021]IYN[+2188.740]TTYLNVQR.E	HexNAc(2)Hex(11)	C[+57], N[+2189]	1368.55	3	4103.64	4104.64	-1	1.5	87	Specific	254.61	109.06	109.06	6.11	53	>sp|P02763|A1AG1_HUMAN Alpha-1-acid glycoprotein 1 OS=Homo sapiens OX=9606 GN=ORM1 PE=1 SV=1	2208	20210911_zy_urine_ethcd_1.15310.15310.3	controllerType=0 controllerNumber=1 scan=15310	68.3365
02012:3	25	R.RN[+2919.042]WTEAEVK.G	HexNAc(6)Hex(6)Fuc(1)NeuAc(2)	N[+2919]	1351.55	3	4052.63	4051.62	1	2.9	331	Specific	254.67	89.5	89.5	5.11	10	>sp|P16444|DPEP1_HUMAN Dipeptidase 1 OS=Homo sapiens OX=9606 GN=DPEP1 PE=1 SV=3	2717	20210911_zy_urine_ethcd_1.2212.2212.3	controllerType=0 controllerNumber=1 scan=2212	9.9992
01382:3	21	R.N[+2350.830]MTQGR.C	HexNAc(4)Hex(5)Fuc(1)NeuAc(2)	N[+2351]	1019.72	3	3057.15	3057.16	0	-2.1	62	Specific	254.68	68.14	68.14	4.92	25	>sp|P07998|RNAS1_HUMAN Ribonuclease pancreatic OS=Homo sapiens OX=9606 GN=RNASE1 PE=1 SV=4	14690	20210911_zy_urine_ethcd_1.1525.1525.3	controllerType=0 controllerNumber=1 scan=1525	7.0783
13795:3	2	R.QDQC[+57.021]IYN[+2569.905]TTYLNVQR.E	HexNAc(5)Hex(6)NeuAc(2)	C[+57], N[+2570]	1495.6	3	4484.79	4485.8	-1	-2.2	87	Specific	254.73	86.79	86.79	7.09	53	>sp|P02763|A1AG1_HUMAN Alpha-1-acid glycoprotein 1 OS=Homo sapiens OX=9606 GN=ORM1 PE=1 SV=1	2208	20210911_zy_urine_ethcd_1.15128.15128.3	controllerType=0 controllerNumber=1 scan=15128	67.5491
01383:3	2	R.NEEYN[+2204.772]K.S	HexNAc(4)Hex(5)NeuAc(2)	N[+2205]	1001.04	3	3001.11	3001.12	0	-4.2	52	Specific	254.81	115.76	115.76	4.78	53	>sp|P02763|A1AG1_HUMAN Alpha-1-acid glycoprotein 1 OS=Homo sapiens OX=9606 GN=ORM1 PE=1 SV=1	2208	20210911_zy_urine_ethcd_1.1526.1526.3	controllerType=0 controllerNumber=1 scan=1526	7.0824
06519:3	3	K.ELHHLQEQN[+2350.830]VSNAFLDK.G	HexNAc(4)Hex(5)Fuc(1)NeuAc(2)	N[+2351]	1457.94	3	4371.82	4372.83	-1	-2.7	754	Specific	254.92	152.34	42.62	6.41	26	>sp|P00450|CERU_HUMAN Ceruloplasmin OS=Homo sapiens OX=9606 GN=CP PE=1 SV=1	460	20210911_zy_urine_ethcd_1.7158.7158.3	controllerType=0 controllerNumber=1 scan=7158	32.0762
11923:4	7	R.ADGTVNQIEGEATPVN[+2569.905]LTEPAK.L	HexNAc(5)Hex(6)NeuAc(2)	N[+2570]	1206.76	4	4824.01	4824.02	0	-3.7	83	Specific	255.05	195.97	195.97	7.47	25	>sp|P05090|APOD_HUMAN Apolipoprotein D OS=Homo sapiens OX=9606 GN=APOD PE=1 SV=1	120	20210911_zy_urine_ethcd_1.13080.13080.4	controllerType=0 controllerNumber=1 scan=13080	58.5208
07423:3	30	K.LGN[+2204.772]WSAMPSC[+57.021]K.A	HexNAc(4)Hex(5)NeuAc(2)	C[+57], N[+2205]	1152.45	3	3455.32	3455.34	0	-4	251	Specific	255.1	98.64	98.64	5.47	7	>sp|P02749|APOH_HUMAN Beta-2-glycoprotein 1 OS=Homo sapiens OX=9606 GN=APOH PE=1 SV=3	19971	20210911_zy_urine_ethcd_1.8151.8151.3	controllerType=0 controllerNumber=1 scan=8151	36.4941
07028:3	1	R.C[+57.021]NTAAPM[+15.995]WLN[+2059.735]GTHPSSDEGIVSR.K	HexNAc(4)Hex(5)Fuc(1)NeuAc(1)	C[+57], M[+16], N[+2060]	1525.95	3	4575.85	4575.86	0	-3.8	223	Specific	255.12	172.5	103.59	7.43	49	>sp|P07911|UROM_HUMAN Uromodulin OS=Homo sapiens OX=9606 GN=UMOD PE=1 SV=1	16609	20210911_zy_urine_ethcd_1.7718.7718.3	controllerType=0 controllerNumber=1 scan=7718	34.57
04123:4	19	K.NLFLN[+2204.772]HSEN[+1913.677]ATAK.D	HexNAc(4)Hex(5)NeuAc(2),HexNAc(4)Hex(5)NeuAc(1)	N[+1914][+2205]	1395.05	4	5577.18	5577.18	0	-1.2	203	Specific	255.71	255.71	2.24	5.93	20	>sp|P00738|HPT_HUMAN Haptoglobin OS=Homo sapiens OX=9606 GN=HP PE=1 SV=1	3044	20210911_zy_urine_ethcd_1.4530.4530.4	controllerType=0 controllerNumber=1 scan=4530	20.2687
03246:3	10	R.EEQFN[+2221.788]STFR.V	HexNAc(4)Hex(6)Fuc(1)NeuAc(1)	N[+2222]	1127.11	3	3379.31	3379.31	0	-1.2	172	Specific	255.84	85.81	85.81	6	27	>sp|P01859|IGHG2_HUMAN Immunoglobulin heavy constant gamma 2 OS=Homo sapiens OX=9606 GN=IGHG2 PE=1 SV=2	2858	20210911_zy_urine_ethcd_1.3566.3566.3	controllerType=0 controllerNumber=1 scan=3566	15.9021
03574:3	98	R.N[+2204.772]VSWATGR.S	HexNAc(4)Hex(5)NeuAc(2)	N[+2205]	1032.41	3	3095.21	3095.22	0	-2.8	151	Specific	255.88	97.41	97.41	3.43	1	>sp|P08571|CD14_HUMAN Monocyte differentiation antigen CD14 OS=Homo sapiens OX=9606 GN=CD14 PE=1 SV=2	4791	20210911_zy_urine_ethcd_1.3927.3927.3	controllerType=0 controllerNumber=1 scan=3927	17.5393
00875:3	23	R.N[+1710.598]LSGPDKR.L	HexNAc(3)Hex(5)NeuAc(1)	N[+1711]	866.36	3	2597.07	2597.07	0	-2.1	500	Specific	256.1	81.11	81.11	4.9	11	>sp|Q6EMK4|VASN_HUMAN Vasorin OS=Homo sapiens OX=9606 GN=VASN PE=1 SV=1	18175	20210911_zy_urine_ethcd_1.968.968.3	controllerType=0 controllerNumber=1 scan=968	4.549
15164:3	33	K.SVVAPATDGGLN[+2715.963]LTSTFLR.K	HexNAc(5)Hex(6)Fuc(1)NeuAc(2)	N[+2716]	1545.66	3	4634.98	4634.99	0	-1.7	67	Specific	256.51	140.24	140.24	6.27	11	>sp|P41222|PTGDS_HUMAN Prostaglandin-H2 D-isomerase OS=Homo sapiens OX=9606 GN=PTGDS PE=1 SV=1	16974	20210911_zy_urine_ethcd_1.16624.16624.3	controllerType=0 controllerNumber=1 scan=16624	74.0972
09718:3	12	K.LNAENN[+2391.857]ATFYFK.I	HexNAc(5)Hex(4)Fuc(1)NeuAc(2)	N[+2392]	1275.19	3	3823.54	3823.55	0	-1.2	289	Specific	256.73	95.79	95.79	5.71	26	>sp|P01042|KNG1_HUMAN Kininogen-1 OS=Homo sapiens OX=9606 GN=KNG1 PE=1 SV=2	6533	20210911_zy_urine_ethcd_1.10665.10665.3	controllerType=0 controllerNumber=1 scan=10665	47.7388
05197:3	3	K.EHEGAIYPDN[+2715.963]TTDFQR.A	HexNAc(5)Hex(6)Fuc(1)NeuAc(2)	N[+2716]	1536.6	3	4607.8	4608.8	-1	0	129	Specific	257.33	140.24	140.24	5.86	26	>sp|P00450|CERU_HUMAN Ceruloplasmin OS=Homo sapiens OX=9606 GN=CP PE=1 SV=1	460	20210911_zy_urine_ethcd_1.5709.5709.3	controllerType=0 controllerNumber=1 scan=5709	25.5974
02303:3	4	R.EN[+3663.286]GTVSR.Y	HexNAc(6)Hex(7)Fuc(1)NeuAc(4)	N[+3663]	1475.89	3	4425.65	4425.66	0	-2.7	102	Specific	257.47	75.33	75.33	5.25	34	>sp|P19652|A1AG2_HUMAN Alpha-1-acid glycoprotein 2 OS=Homo sapiens OX=9606 GN=ORM2 PE=1 SV=2	4531	20210911_zy_urine_ethcd_1.2530.2530.3	controllerType=0 controllerNumber=1 scan=2530	11.3298
08924:4	8	K.DIVEYYN[+2204.772]DSNGSHVLQGR.F	HexNAc(4)Hex(5)NeuAc(2)	N[+2205]	1068.44	4	4270.73	4270.73	0	-0.9	103	Specific	257.48	158.73	71.49	5.88	33	>sp|P25311|ZA2G_HUMAN Zinc-alpha-2-glycoprotein OS=Homo sapiens OX=9606 GN=AZGP1 PE=1 SV=2	18783	20210911_zy_urine_ethcd_1.9795.9795.4	controllerType=0 controllerNumber=1 scan=9795	43.8274
04025:3	91	R.GGSSGWSGGLAQN[+2204.772]R.S	HexNAc(4)Hex(5)NeuAc(2)	N[+2205]	1180.13	3	3538.39	3538.4	0	-3	425	Specific	257.53	100.77	100.77	4.12	1	>sp|P07357|CO8A_HUMAN Complement component C8 alpha chain OS=Homo sapiens OX=9606 GN=C8A PE=1 SV=2	5176	20210911_zy_urine_ethcd_1.4422.4422.3	controllerType=0 controllerNumber=1 scan=4422	19.7826
10829:3	1	R.C[+57.021]NTAAPMWLN[+2204.772]GTHPSSDEGIVSR.K	HexNAc(4)Hex(5)NeuAc(2)	C[+57], N[+2205]	1568.97	3	4704.9	4704.91	0	-1.8	223	Specific	257.78	155.86	155.86	7.58	49	>sp|P07911|UROM_HUMAN Uromodulin OS=Homo sapiens OX=9606 GN=UMOD PE=1 SV=1	16609	20210911_zy_urine_ethcd_1.11881.11881.3	controllerType=0 controllerNumber=1 scan=11881	53.118
12100:4	2	R.QDQC[+57.021]IYN[+3737.322]TTYLNVQR.E	HexNAc(7)Hex(8)Fuc(1)NeuAc(3)	C[+57], N[+3737]	1413.81	4	5652.2	5653.22	-1	-2.2	87	Specific	257.88	134.35	134.35	7.32	53	>sp|P02763|A1AG1_HUMAN Alpha-1-acid glycoprotein 1 OS=Homo sapiens OX=9606 GN=ORM1 PE=1 SV=1	2208	20210911_zy_urine_ethcd_1.13274.13274.4	controllerType=0 controllerNumber=1 scan=13274	59.3902
05155:3	48	R.QAIHVGN[+1216.423]QTFNDGTIVEK.Y	HexNAc(2)Hex(5)	N[+1216]	1063.14	3	3187.41	3187.42	0	-2.4	340	Specific	258.38	211.91	211.91	6.81	3	>sp|Q9H3G5|CPVL_HUMAN Probable serine carboxypeptidase CPVL OS=Homo sapiens OX=9606 GN=CPVL PE=1 SV=2	298	20210911_zy_urine_ethcd_1.5663.5663.3	controllerType=0 controllerNumber=1 scan=5663	25.3923
04227:3	97	R.N[+1710.598]QSSAFSPPDPALR.T	HexNAc(3)Hex(5)NeuAc(1)	N[+1711]	1066.44	3	3197.32	3197.33	0	-2.3	331	Specific	258.39	29.06	29.06	3.19	3	>sp|Q6ZW33|MICLK_HUMAN MICAL C-terminal-like protein OS=Homo sapiens OX=9606 GN=MICALCL PE=1 SV=3	5509	20210911_zy_urine_ethcd_1.4644.4644.3	controllerType=0 controllerNumber=1 scan=4644	20.7881
06943:4	3	K.ELHHLQEQN[+3007.058]VSNAFLDK.G	HexNAc(5)Hex(6)Fuc(1)NeuAc(3)	N[+3007]	1258.02	4	5029.04	5029.06	0	-3.6	754	Specific	258.63	203.35	203.35	6.42	26	>sp|P00450|CERU_HUMAN Ceruloplasmin OS=Homo sapiens OX=9606 GN=CP PE=1 SV=1	460	20210911_zy_urine_ethcd_1.7625.7625.4	controllerType=0 controllerNumber=1 scan=7625	34.1584
10564:3	11	K.N[+2204.772]FTENDLLVR.I	HexNAc(4)Hex(5)NeuAc(2)	N[+2205]	1142.47	3	3425.39	3425.4	0	-1.8	416	Specific	258.74	112.15	112.15	5.58	13	>sp|P00734|THRB_HUMAN Prothrombin OS=Homo sapiens OX=9606 GN=F2 PE=1 SV=2	18404	20210911_zy_urine_ethcd_1.11591.11591.3	controllerType=0 controllerNumber=1 scan=11591	51.8349
07820:4	4	R.QNQC[+57.021]FYN[+2643.941]SSYLNVQR.E	HexNAc(6)Hex(7)NeuAc(1)	C[+57], N[+2644]	1141.71	4	4563.8	4564.81	-1	0.1	87	Specific	259	131.17	131.17	6.54	34	>sp|P19652|A1AG2_HUMAN Alpha-1-acid glycoprotein 2 OS=Homo sapiens OX=9606 GN=ORM2 PE=1 SV=2	4531	20210911_zy_urine_ethcd_1.8586.8586.4	controllerType=0 controllerNumber=1 scan=8586	38.4467
10556:3	1	R.C[+57.021]NTAAPMWLN[+2204.772]GTHPSSDEGIVSR.K	HexNAc(4)Hex(5)NeuAc(2)	C[+57], N[+2205]	1568.97	3	4704.9	4704.91	0	-2.1	223	Specific	259.77	144.41	144.41	7.58	49	>sp|P07911|UROM_HUMAN Uromodulin OS=Homo sapiens OX=9606 GN=UMOD PE=1 SV=1	16609	20210911_zy_urine_ethcd_1.11582.11582.3	controllerType=0 controllerNumber=1 scan=11582	51.795
00901:3	43	R.TQPSSEN[+2204.772]K.T	HexNAc(4)Hex(5)NeuAc(2)	N[+2205]	1032.4	3	3095.18	3095.19	0	-3.5	141	Specific	260.02	92.87	92.87	5.15	4	>sp|Q9NZP8|C1RL_HUMAN Complement C1r subcomponent-like protein OS=Homo sapiens OX=9606 GN=C1RL PE=1 SV=2	126	20210911_zy_urine_ethcd_1.997.997.3	controllerType=0 controllerNumber=1 scan=997	4.6842
02279:3	4	R.EN[+3663.286]GTVSR.Y	HexNAc(6)Hex(7)Fuc(1)NeuAc(4)	N[+3663]	1475.56	3	4424.65	4425.66	-1	-1.2	102	Specific	260.41	92.97	92.97	5.5	34	>sp|P19652|A1AG2_HUMAN Alpha-1-acid glycoprotein 2 OS=Homo sapiens OX=9606 GN=ORM2 PE=1 SV=2	4531	20210911_zy_urine_ethcd_1.2504.2504.3	controllerType=0 controllerNumber=1 scan=2504	11.2104
12274:4	1	R.C[+57.021]NTAAPMWLN[+3372.190]GTHPSSDEGIVSR.K	HexNAc(6)Hex(7)Fuc(1)NeuAc(3)	C[+57], N[+3372]	1468.83	4	5872.31	5872.32	0	-2.1	223	Specific	260.45	164.74	164.74	7.49	49	>sp|P07911|UROM_HUMAN Uromodulin OS=Homo sapiens OX=9606 GN=UMOD PE=1 SV=1	16609	20210911_zy_urine_ethcd_1.13464.13464.4	controllerType=0 controllerNumber=1 scan=13464	60.2265
07135:3	22	K.SSN[+2336.851]NSMLLVFK.T	HexNAc(6)Hex(6)Fuc(1)	N[+2337]	1192.83	3	3576.49	3576.49	0	-1.1	3123	Specific	260.52	116.98	116.98	5.41	16	>sp|O60494|CUBN_HUMAN Cubilin OS=Homo sapiens OX=9606 GN=CUBN PE=1 SV=5	6499	20210911_zy_urine_ethcd_1.7835.7835.4	controllerType=0 controllerNumber=1 scan=7835	35.0849
01736:2	104	K.WVSN[+2204.772]K.T	HexNAc(4)Hex(5)NeuAc(2)	N[+2205]	1419.56	2	2838.1	2838.11	0	-1.9	221	Specific	260.55	52.15	52.15	2.6	5	>sp|P01008|ANT3_HUMAN Antithrombin-III OS=Homo sapiens OX=9606 GN=SERPINC1 PE=1 SV=1	546	20210911_zy_urine_ethcd_1.1912.1912.2	controllerType=0 controllerNumber=1 scan=1912	8.7517
01304:3	2	R.NEEYN[+2715.963]K.S	HexNAc(5)Hex(6)Fuc(1)NeuAc(2)	N[+2716]	1171.44	3	3512.3	3512.31	0	-2.7	52	Specific	260.94	88.11	88.11	4.92	53	>sp|P02763|A1AG1_HUMAN Alpha-1-acid glycoprotein 1 OS=Homo sapiens OX=9606 GN=ORM1 PE=1 SV=1	2208	20210911_zy_urine_ethcd_1.1439.1439.3	controllerType=0 controllerNumber=1 scan=1439	6.6944
08638:3	18	R.LAN[+2141.788]LTQGEDQYYLR.V	HexNAc(6)Hex(3)Fuc(1)NeuAc(1)	N[+2142]	1275.88	3	3825.61	3825.62	0	-1.8	372	Specific	261.22	158.96	158.96	6.08	18	>sp|P10909|CLUS_HUMAN Clusterin OS=Homo sapiens OX=9606 GN=CLU PE=1 SV=1	6125	20210911_zy_urine_ethcd_1.9481.9481.3	controllerType=0 controllerNumber=1 scan=9481	42.4038
12586:4	2	R.QDQC[+57.021]IYN[+3663.286]TTYLNVQR.E	HexNAc(6)Hex(7)Fuc(1)NeuAc(4)	C[+57], N[+3663]	1395.56	4	5579.2	5579.18	0	3.6	87	Specific	261.76	158.34	158.34	5.6	53	>sp|P02763|A1AG1_HUMAN Alpha-1-acid glycoprotein 1 OS=Homo sapiens OX=9606 GN=ORM1 PE=1 SV=1	2208	20210911_zy_urine_ethcd_1.13805.13805.4	controllerType=0 controllerNumber=1 scan=13805	61.7207
01928:3	8	R.FGC[+57.021]EIENN[+1971.719]R.S	HexNAc(5)Hex(5)Fuc(1)	C[+57], N[+1972]	1037.41	3	3110.21	3110.21	0	-2.5	121	Specific	261.79	152.15	152.15	5.98	33	>sp|P25311|ZA2G_HUMAN Zinc-alpha-2-glycoprotein OS=Homo sapiens OX=9606 GN=AZGP1 PE=1 SV=2	18783	20210911_zy_urine_ethcd_1.2121.2121.3	controllerType=0 controllerNumber=1 scan=2121	9.6221
04412:3	6	K.TPLTAN[+2350.830]ITK.S	HexNAc(4)Hex(5)Fuc(1)NeuAc(2)	N[+2351]	1103.8	3	3309.38	3309.39	0	-2.2	200	Specific	262.67	133.98	133.98	6.13	32	>sp|P01877|IGHA2_HUMAN Immunoglobulin heavy constant alpha 2 OS=Homo sapiens OX=9606 GN=IGHA2 PE=1 SV=4	10403	20210911_zy_urine_ethcd_1.4847.4847.3	controllerType=0 controllerNumber=1 scan=4847	21.7044
02639:3	2	R.EN[+3663.286]GTISR.Y	HexNAc(6)Hex(7)Fuc(1)NeuAc(4)	N[+3663]	1480.23	3	4438.66	4439.68	-1	-2.3	102	Specific	262.84	30.26	30.26	4.68	53	>sp|P02763|A1AG1_HUMAN Alpha-1-acid glycoprotein 1 OS=Homo sapiens OX=9606 GN=ORM1 PE=1 SV=1	2208	20210911_zy_urine_ethcd_1.2900.2900.3	controllerType=0 controllerNumber=1 scan=2900	12.9464
03044:3	6	K.TPLTAN[+2059.735]ITK.S	HexNAc(4)Hex(5)Fuc(1)NeuAc(1)	N[+2060]	1006.77	3	3018.28	3018.29	0	-2.5	200	Specific	263.17	103.68	103.68	6.04	32	>sp|P01877|IGHA2_HUMAN Immunoglobulin heavy constant alpha 2 OS=Homo sapiens OX=9606 GN=IGHA2 PE=1 SV=4	10403	20210911_zy_urine_ethcd_1.3344.3344.3	controllerType=0 controllerNumber=1 scan=3344	14.8792
12809:3	2	R.QDQC[+57.021]IYN[+3226.132]TTYLNVQR.E	HexNAc(6)Hex(7)NeuAc(3)	C[+57], N[+3226]	1714.68	3	5142.03	5142.03	0	0.8	87	Specific	263.45	136.66	136.66	5.97	53	>sp|P02763|A1AG1_HUMAN Alpha-1-acid glycoprotein 1 OS=Homo sapiens OX=9606 GN=ORM1 PE=1 SV=1	2208	20210911_zy_urine_ethcd_1.14050.14050.3	controllerType=0 controllerNumber=1 scan=14050	62.8058
01279:3	21	R.N[+2350.830]MTQGR.C	HexNAc(4)Hex(5)Fuc(1)NeuAc(2)	N[+2351]	1019.72	3	3057.15	3057.16	0	-2.1	62	Specific	263.47	76.85	76.85	4.93	25	>sp|P07998|RNAS1_HUMAN Ribonuclease pancreatic OS=Homo sapiens OX=9606 GN=RNASE1 PE=1 SV=4	14690	20210911_zy_urine_ethcd_1.1412.1412.3	controllerType=0 controllerNumber=1 scan=1412	6.5731
09101:3	8	K.DIVEYYNDSN[+2350.830]GSHVLQGR.F	HexNAc(4)Hex(5)Fuc(1)NeuAc(2)	N[+2351]	1473.26	3	4417.77	4416.79	1	-4.8	103	Specific	263.58	126.52	2.32	6.45	33	>sp|P25311|ZA2G_HUMAN Zinc-alpha-2-glycoprotein OS=Homo sapiens OX=9606 GN=AZGP1 PE=1 SV=2	18783	20210911_zy_urine_ethcd_1.9989.9989.3	controllerType=0 controllerNumber=1 scan=9989	44.6943
08545:3	16	K.TAVN[+2059.735]C[+57.021]SSDFDAC[+57.021]LITK.A	HexNAc(4)Hex(5)Fuc(1)NeuAc(1)	C[+57]*2, N[+2060]	1287.86	3	3861.55	3861.54	0	1.6	40	Specific	263.81	152.72	152.72	5.43	11	>sp|P13987|CD59_HUMAN CD59 glycoprotein OS=Homo sapiens OX=9606 GN=CD59 PE=1 SV=1	1116	20210911_zy_urine_ethcd_1.9379.9379.3	controllerType=0 controllerNumber=1 scan=9379	41.9446
07529:3	46	R.GGYIFPTQQPN[+2481.889]TTTLASR.K	HexNAc(6)Hex(6)NeuAc(1)	N[+2482]	1478.63	3	4433.89	4433.88	0	2.4	817	Specific	264.43	90.74	90.74	5.83	5	>sp|O43451|MGA_HUMAN Maltase-glucoamylase, intestinal OS=Homo sapiens OX=9606 GN=MGAM PE=1 SV=5	7929	20210911_zy_urine_ethcd_1.8267.8267.3	controllerType=0 controllerNumber=1 scan=8267	37.0096
01998:3	113	R.N[+2204.772]ITVK.T	HexNAc(4)Hex(5)NeuAc(2)	N[+2205]	927.046	3	2779.12	2779.13	0	-2	225	Specific	264.56	24.57	24.57	1.96	7	>sp|P22891|PROZ_HUMAN Vitamin K-dependent protein Z OS=Homo sapiens OX=9606 GN=PROZ PE=1 SV=2	12998	20210911_zy_urine_ethcd_1.2197.2197.3	controllerType=0 controllerNumber=1 scan=2197	9.9403
02707:3	65	K.TWSAFQN[+1971.719]GTDR.R	HexNAc(5)Hex(5)Fuc(1)	N[+1972]	1085.44	3	3254.29	3254.3	0	-2.8	1490	Specific	264.69	140.96	140.96	4.06	9	>sp|P98164|LRP2_HUMAN Low-density lipoprotein receptor-related protein 2 OS=Homo sapiens OX=9606 GN=LRP2 PE=1 SV=3	10997	20210911_zy_urine_ethcd_1.2975.2975.3	controllerType=0 controllerNumber=1 scan=2975	13.2722
01575:3	20	R.EEQYN[+1971.719]STYR.V	HexNAc(5)Hex(5)Fuc(1)	N[+1972]	1054.41	3	3161.22	3161.23	0	-3.1	295	Specific	264.84	93.86	93.86	5.82	13	>sp|P0DOX5|IGG1_HUMAN Immunoglobulin gamma-1 heavy chain OS=Homo sapiens OX=9606 PE=1 SV=2	10252	20210911_zy_urine_ethcd_1.1736.1736.3	controllerType=0 controllerNumber=1 scan=1736	7.9991
12763:3	2	R.QDQC[+57.021]IYN[+2715.963]TTYLNVQR.E	HexNAc(5)Hex(6)Fuc(1)NeuAc(2)	C[+57], N[+2716]	1544.29	3	4630.87	4631.86	-1	2.7	87	Specific	265.77	149.49	149.49	5.87	53	>sp|P02763|A1AG1_HUMAN Alpha-1-acid glycoprotein 1 OS=Homo sapiens OX=9606 GN=ORM1 PE=1 SV=1	2208	20210911_zy_urine_ethcd_1.13999.13999.3	controllerType=0 controllerNumber=1 scan=13999	62.5823
05798:3	12	R.ITYSIVQTN[+2715.963]C[+57.021]SK.E	HexNAc(5)Hex(6)Fuc(1)NeuAc(2)	C[+57], N[+2716]	1377.22	3	4129.66	4129.67	0	-2.8	197	Specific	265.99	123.24	123.24	5.71	26	>sp|P01042|KNG1_HUMAN Kininogen-1 OS=Homo sapiens OX=9606 GN=KNG1 PE=1 SV=2	6533	20210911_zy_urine_ethcd_1.6367.6367.3	controllerType=0 controllerNumber=1 scan=6367	28.5464
12740:3	2	R.QDQC[+57.021]IYN[+2569.905]TTYLNVQR.E	HexNAc(5)Hex(6)NeuAc(2)	C[+57], N[+2570]	1495.94	3	4485.79	4485.8	0	-1.7	87	Specific	266.06	137.39	137.39	6.69	53	>sp|P02763|A1AG1_HUMAN Alpha-1-acid glycoprotein 1 OS=Homo sapiens OX=9606 GN=ORM1 PE=1 SV=1	2208	20210911_zy_urine_ethcd_1.13974.13974.3	controllerType=0 controllerNumber=1 scan=13974	62.4699
01474:3	20	R.EEQYN[+1622.582]STYR.V	HexNAc(4)Hex(5)	N[+1623]	938.035	3	2812.09	2812.09	0	-1.2	295	Specific	266.34	144.59	144.59	5.93	13	>sp|P0DOX5|IGG1_HUMAN Immunoglobulin gamma-1 heavy chain OS=Homo sapiens OX=9606 PE=1 SV=2	10252	20210911_zy_urine_ethcd_1.1626.1626.3	controllerType=0 controllerNumber=1 scan=1626	7.537
03923:3	39	R.DIENFN[+2350.830]STQK.F	HexNAc(4)Hex(5)Fuc(1)NeuAc(2)	N[+2351]	1182.8	3	3546.38	3546.39	0	-3.6	28	Specific	266.56	118.39	118.39	5.47	7	>sp|P43652|AFAM_HUMAN Afamin OS=Homo sapiens OX=9606 GN=AFM PE=1 SV=1	20367	20210911_zy_urine_ethcd_1.4310.4310.3	controllerType=0 controllerNumber=1 scan=4310	19.2716
12748:3	13	K.VPGN[+2100.761]VTAVLGETLK.V	HexNAc(5)Hex(4)Fuc(1)NeuAc(1)	N[+2101]	1166.86	3	3498.55	3498.56	0	-2.1	466	Specific	266.72	100.18	100.18	6.15	16	>sp|P01833|PIGR_HUMAN Polymeric immunoglobulin receptor OS=Homo sapiens OX=9606 GN=PIGR PE=1 SV=4	10083	20210911_zy_urine_ethcd_1.13983.13983.3	controllerType=0 controllerNumber=1 scan=13983	62.5113
03378:3	32	R.SLHVPGLN[+2424.867]K.T	HexNAc(5)Hex(6)Fuc(1)NeuAc(1)	N[+2425]	1130.48	3	3389.41	3389.42	0	-3.6	191	Specific	266.92	85.89	85.89	6.15	7	>sp|P30530|UFO_HUMAN Tyrosine-protein kinase receptor UFO OS=Homo sapiens OX=9606 GN=AXL PE=1 SV=4	18964	20210911_zy_urine_ethcd_1.3711.3711.3	controllerType=0 controllerNumber=1 scan=3711	16.5572
01526:3	2	R.EN[+2204.772]GTISR.Y	HexNAc(4)Hex(5)NeuAc(2)	N[+2205]	994.39	3	2981.16	2981.16	0	-2.1	102	Specific	267.13	32.46	32.46	4.65	53	>sp|P02763|A1AG1_HUMAN Alpha-1-acid glycoprotein 1 OS=Homo sapiens OX=9606 GN=ORM1 PE=1 SV=1	2208	20210911_zy_urine_ethcd_1.1682.1682.3	controllerType=0 controllerNumber=1 scan=1682	7.775
05697:3	8	K.DIVEYYNDSN[+2262.814]GSHVLQGR.F	HexNAc(5)Hex(5)Fuc(1)NeuAc(1)	N[+2263]	1443.93	3	4329.76	4328.77	1	-2.8	103	Specific	267.57	137.1	2.32	6.75	33	>sp|P25311|ZA2G_HUMAN Zinc-alpha-2-glycoprotein OS=Homo sapiens OX=9606 GN=AZGP1 PE=1 SV=2	18783	20210911_zy_urine_ethcd_1.6257.6257.3	controllerType=0 controllerNumber=1 scan=6257	28.0516
01403:2	42	R.YEQLQN[+1702.581]ETR.Q	HexNAc(2)Hex(8)	N[+1703]	1442.07	2	2883.14	2883.14	0	-1.4	162	Specific	267.61	115.23	115.23	6.07	4	>sp|P11117|PPAL_HUMAN Lysosomal acid phosphatase OS=Homo sapiens OX=9606 GN=ACP2 PE=1 SV=3	11545	20210911_zy_urine_ethcd_1.1548.1548.2	controllerType=0 controllerNumber=1 scan=1548	7.1826
02332:3	14	R.EEQFN[+2100.761]STYR.V	HexNAc(5)Hex(4)Fuc(1)NeuAc(1)	N[+2101]	1092.1	3	3274.27	3274.28	0	-2.1	173	Specific	267.95	70.62	70.62	6.07	17	>sp|P01861|IGHG4_HUMAN Immunoglobulin heavy constant gamma 4 OS=Homo sapiens OX=9606 GN=IGHG4 PE=1 SV=1	12793	20210911_zy_urine_ethcd_1.2562.2562.3	controllerType=0 controllerNumber=1 scan=2562	11.4745
02729:3	2	R.EN[+3663.286]GTISR.Y	HexNAc(6)Hex(7)Fuc(1)NeuAc(4)	N[+3663]	1480.56	3	4439.67	4439.68	0	-1.2	102	Specific	268.84	31.86	31.86	4.49	53	>sp|P02763|A1AG1_HUMAN Alpha-1-acid glycoprotein 1 OS=Homo sapiens OX=9606 GN=ORM1 PE=1 SV=1	2208	20210911_zy_urine_ethcd_1.2999.2999.3	controllerType=0 controllerNumber=1 scan=2999	13.3773
03257:3	47	K.MFSQN[+3007.058]DTR.C	HexNAc(5)Hex(6)Fuc(1)NeuAc(3)	N[+3007]	1335.83	3	4005.49	4005.49	0	-1.7	321	Specific	269.84	65.41	65.41	5.22	5	>sp|P02750|A2GL_HUMAN Leucine-rich alpha-2-glycoprotein OS=Homo sapiens OX=9606 GN=LRG1 PE=1 SV=2	1095	20210911_zy_urine_ethcd_1.3578.3578.3	controllerType=0 controllerNumber=1 scan=3578	15.9553
01178:3	4	R.EN[+2715.963]GTVSR.Y	HexNAc(5)Hex(6)Fuc(1)NeuAc(2)	N[+2716]	1160.12	3	3478.34	3478.34	0	0.3	102	Specific	270	84.95	84.95	4.6	34	>sp|P19652|A1AG2_HUMAN Alpha-1-acid glycoprotein 2 OS=Homo sapiens OX=9606 GN=ORM2 PE=1 SV=2	4531	20210911_zy_urine_ethcd_1.1300.1300.3	controllerType=0 controllerNumber=1 scan=1300	6.0529
11920:3	7	R.ADGTVNQIEGEATPVN[+2569.905]LTEPAK.L	HexNAc(5)Hex(6)NeuAc(2)	N[+2570]	1608.34	3	4823.02	4824.02	-1	-0.8	83	Specific	270.26	160.02	160.02	7.02	25	>sp|P05090|APOD_HUMAN Apolipoprotein D OS=Homo sapiens OX=9606 GN=APOD PE=1 SV=1	120	20210911_zy_urine_ethcd_1.13077.13077.3	controllerType=0 controllerNumber=1 scan=13077	58.506
01479:3	2	R.EN[+2715.963]GTISR.Y	HexNAc(5)Hex(6)Fuc(1)NeuAc(2)	N[+2716]	1164.79	3	3492.35	3492.35	0	-1.8	102	Specific	270.89	32.01	32.01	4.65	53	>sp|P02763|A1AG1_HUMAN Alpha-1-acid glycoprotein 1 OS=Homo sapiens OX=9606 GN=ORM1 PE=1 SV=1	2208	20210911_zy_urine_ethcd_1.1631.1631.3	controllerType=0 controllerNumber=1 scan=1631	7.5623
04234:3	30	K.LGN[+2204.772]WSAM[+15.995]PSC[+57.021]K.A	HexNAc(4)Hex(5)NeuAc(2)	C[+57], M[+16], N[+2205]	1157.78	3	3471.33	3471.33	0	-2.2	251	Specific	270.93	134.67	134.67	5.54	7	>sp|P02749|APOH_HUMAN Beta-2-glycoprotein 1 OS=Homo sapiens OX=9606 GN=APOH PE=1 SV=3	19971	20210911_zy_urine_ethcd_1.4652.4652.3	controllerType=0 controllerNumber=1 scan=4652	20.822
06025:3	68	R.FN[+2204.772]DTEVLQR.L	HexNAc(4)Hex(5)NeuAc(2)	N[+2205]	1109.45	3	3326.33	3326.33	0	-1.4	149	Specific	271.15	105.03	105.03	4.64	4	>sp|P43251|BTD_HUMAN Biotinidase OS=Homo sapiens OX=9606 GN=BTD PE=1 SV=2	2991	20210911_zy_urine_ethcd_1.6617.6617.3	controllerType=0 controllerNumber=1 scan=6617	29.6741
03573:3	13	K.WN[+1872.651]NTGC[+57.021]QALPSQDEGPSK.A	HexNAc(3)Hex(6)NeuAc(1)	C[+57], N[+1873]	1287.84	3	3861.51	3861.53	0	-4.8	498	Specific	271.31	132.72	132.72	6.37	16	>sp|P01833|PIGR_HUMAN Polymeric immunoglobulin receptor OS=Homo sapiens OX=9606 GN=PIGR PE=1 SV=4	10083	20210911_zy_urine_ethcd_1.3926.3926.3	controllerType=0 controllerNumber=1 scan=3926	17.5346
05062:3	3	K.ELHHLQEQN[+1913.677]VSNAFLDK.G	HexNAc(4)Hex(5)NeuAc(1)	N[+1914]	1312.56	3	3935.68	3935.68	0	-0.9	754	Specific	271.41	144.88	144.88	6	26	>sp|P00450|CERU_HUMAN Ceruloplasmin OS=Homo sapiens OX=9606 GN=CP PE=1 SV=1	460	20210911_zy_urine_ethcd_1.5561.5561.3	controllerType=0 controllerNumber=1 scan=5561	24.9314
09617:3	38	K.TVLTPATNHMGN[+1378.476]VTFTIPANR.E	HexNAc(2)Hex(6)	N[+1378]	1211.88	3	3633.63	3633.64	0	-2.3	74	Specific	271.81	196.62	98.62	7.26	9	>sp|P01024|CO3_HUMAN Complement C3 OS=Homo sapiens OX=9606 GN=C3 PE=1 SV=2	731	20210911_zy_urine_ethcd_1.10554.10554.3	controllerType=0 controllerNumber=1 scan=10554	47.239
14146:3	1	R.FALLMTNC[+57.021]YATPSSN[+2059.735]ATDPLK.Y	HexNAc(4)Hex(5)Fuc(1)NeuAc(1)	C[+57], N[+2060]	1458.95	3	4374.84	4374.84	0	-0.9	499	Specific	271.89	148.15	148.15	6.86	49	>sp|P07911|UROM_HUMAN Uromodulin OS=Homo sapiens OX=9606 GN=UMOD PE=1 SV=1	16609	20210911_zy_urine_ethcd_1.15511.15511.4	controllerType=0 controllerNumber=1 scan=15511	69.2064
01944:3	2	R.EN[+3517.228]GTISR.Y	HexNAc(6)Hex(7)NeuAc(4)	N[+3517]	1432.21	3	4294.63	4293.62	1	2.3	102	Specific	272.41	31.95	31.95	3.24	53	>sp|P02763|A1AG1_HUMAN Alpha-1-acid glycoprotein 1 OS=Homo sapiens OX=9606 GN=ORM1 PE=1 SV=1	2208	20210911_zy_urine_ethcd_1.2138.2138.3	controllerType=0 controllerNumber=1 scan=2138	9.6925
10933:4	1	R.C[+57.021]NTAAPM[+15.995]WLN[+2861.000]GTHPSSDEGIVSR.K	HexNAc(5)Hex(6)NeuAc(3)	C[+57], M[+16], N[+2861]	1345.03	4	5377.1	5377.13	0	-5.3	223	Specific	273	171.67	171.67	7.1	49	>sp|P07911|UROM_HUMAN Uromodulin OS=Homo sapiens OX=9606 GN=UMOD PE=1 SV=1	16609	20210911_zy_urine_ethcd_1.11995.11995.4	controllerType=0 controllerNumber=1 scan=11995	53.6289
09784:3	7	R.ADGTVNQIEGEATPVN[+2424.867]LTEPAK.L	HexNAc(5)Hex(6)Fuc(1)NeuAc(1)	N[+2425]	1560.33	3	4678.98	4678.99	0	-1.7	83	Specific	273.09	170.8	170.8	7.06	25	>sp|P05090|APOD_HUMAN Apolipoprotein D OS=Homo sapiens OX=9606 GN=APOD PE=1 SV=1	120	20210911_zy_urine_ethcd_1.10737.10737.3	controllerType=0 controllerNumber=1 scan=10737	48.0602
01422:3	2	R.NEEYN[+2715.963]K.S	HexNAc(5)Hex(6)Fuc(1)NeuAc(2)	N[+2716]	1171.44	3	3512.3	3512.31	0	-1.5	52	Specific	273.15	70.96	70.96	4.76	53	>sp|P02763|A1AG1_HUMAN Alpha-1-acid glycoprotein 1 OS=Homo sapiens OX=9606 GN=ORM1 PE=1 SV=1	2208	20210911_zy_urine_ethcd_1.1569.1569.3	controllerType=0 controllerNumber=1 scan=1569	7.2837
01759:3	22	R.N[+2174.798]GSNSNSPLLGK.Y	HexNAc(6)Hex(5)Fuc(1)	N[+2175]	1121.47	3	3362.39	3362.4	0	-3.1	3457	Specific	273.48	181.96	181.96	5.52	16	>sp|O60494|CUBN_HUMAN Cubilin OS=Homo sapiens OX=9606 GN=CUBN PE=1 SV=5	6499	20210911_zy_urine_ethcd_1.1937.1937.3	controllerType=0 controllerNumber=1 scan=1937	8.8613
10341:3	2	R.QDQC[+57.021]IYN[+3081.095]TTYLNVQR.E	HexNAc(6)Hex(7)Fuc(1)NeuAc(2)	C[+57], N[+3081]	1666.34	3	4996.99	4996.99	0	0	87	Specific	273.7	143.79	143.79	6.08	53	>sp|P02763|A1AG1_HUMAN Alpha-1-acid glycoprotein 1 OS=Homo sapiens OX=9606 GN=ORM1 PE=1 SV=1	2208	20210911_zy_urine_ethcd_1.11347.11347.3	controllerType=0 controllerNumber=1 scan=11347	50.7574
03335:3	32	R.SLHVPGLN[+2424.867]K.T	HexNAc(5)Hex(6)Fuc(1)NeuAc(1)	N[+2425]	1130.48	3	3389.42	3389.42	0	-1.7	191	Specific	273.88	88.51	88.51	6.09	7	>sp|P30530|UFO_HUMAN Tyrosine-protein kinase receptor UFO OS=Homo sapiens OX=9606 GN=AXL PE=1 SV=4	18964	20210911_zy_urine_ethcd_1.3664.3664.3	controllerType=0 controllerNumber=1 scan=3664	16.3478
01953:3	2	R.EN[+3517.228]GTISR.Y	HexNAc(6)Hex(7)NeuAc(4)	N[+3517]	1432.21	3	4294.63	4293.62	1	2.2	102	Specific	274.36	31.79	31.79	3.24	53	>sp|P02763|A1AG1_HUMAN Alpha-1-acid glycoprotein 1 OS=Homo sapiens OX=9606 GN=ORM1 PE=1 SV=1	2208	20210911_zy_urine_ethcd_1.2148.2148.3	controllerType=0 controllerNumber=1 scan=2148	9.734
07175:3	11	K.PEIN[+2204.772]STTHPGADLQENFC[+57.021]R.N	HexNAc(4)Hex(5)NeuAc(2)	C[+57], N[+2205]	1463.93	3	4389.77	4390.77	-1	1.3	140	Specific	274.48	168.68	168.68	5.59	13	>sp|P00734|THRB_HUMAN Prothrombin OS=Homo sapiens OX=9606 GN=F2 PE=1 SV=2	18404	20210911_zy_urine_ethcd_1.7879.7879.3	controllerType=0 controllerNumber=1 scan=7879	35.2802
05666:4	19	K.NLFLN[+2861.000]HSEN[+1548.545]ATAK.D	HexNAc(5)Hex(6)NeuAc(3),HexNAc(3)Hex(4)NeuAc(1)	N[+1549][+2861]	1467.83	4	5868.28	5868.28	0	0	203	Specific	275.09	275.09	4.6	5.33	20	>sp|P00738|HPT_HUMAN Haptoglobin OS=Homo sapiens OX=9606 GN=HP PE=1 SV=1	3044	20210911_zy_urine_ethcd_1.6223.6223.4	controllerType=0 controllerNumber=1 scan=6223	27.9018
00987:3	57	K.YPHNHHVVN[+1864.634]NTLEGN[+1378.476]C[+57.021]SSK.S	HexNAc(2)Hex(9),HexNAc(2)Hex(6)	C[+57], N[+1378][+1865]	1817.37	3	5450.11	5450.11	0	-1.4	103	Specific	275.13	180.07	0	6.4	5	>sp|P15586|GNS_HUMAN N-acetylglucosamine-6-sulfatase OS=Homo sapiens OX=9606 GN=GNS PE=1 SV=3	5993	20210911_zy_urine_ethcd_1.1091.1091.3	controllerType=0 controllerNumber=1 scan=1091	5.0965
01843:3	2	R.NEEYN[+2861.000]K.S	HexNAc(5)Hex(6)NeuAc(3)	N[+2861]	1219.78	3	3657.34	3657.35	0	-2.5	52	Specific	275.14	79.55	79.55	4.8	53	>sp|P02763|A1AG1_HUMAN Alpha-1-acid glycoprotein 1 OS=Homo sapiens OX=9606 GN=ORM1 PE=1 SV=1	2208	20210911_zy_urine_ethcd_1.2028.2028.3	controllerType=0 controllerNumber=1 scan=2028	9.246
10681:3	8	K.DIVEYYNDSN[+2861.000]GSHVLQGR.F	HexNAc(5)Hex(6)NeuAc(3)	N[+2861]	1642.66	3	4925.95	4926.96	-1	-0.5	103	Specific	275.56	155.94	38.21	6.64	33	>sp|P25311|ZA2G_HUMAN Zinc-alpha-2-glycoprotein OS=Homo sapiens OX=9606 GN=AZGP1 PE=1 SV=2	18783	20210911_zy_urine_ethcd_1.11719.11719.3	controllerType=0 controllerNumber=1 scan=11719	52.4016
12351:4	4	R.QNQC[+57.021]FYN[+3517.228]SSYLNVQR.E	HexNAc(6)Hex(7)NeuAc(4)	C[+57], N[+3517]	1360.28	4	5438.09	5438.09	0	-1.2	87	Specific	275.77	147.3	147.3	6.97	34	>sp|P19652|A1AG2_HUMAN Alpha-1-acid glycoprotein 2 OS=Homo sapiens OX=9606 GN=ORM2 PE=1 SV=2	4531	20210911_zy_urine_ethcd_1.13548.13548.4	controllerType=0 controllerNumber=1 scan=13548	60.5916
01674:3	4	R.EN[+3226.132]GTVSR.Y	HexNAc(6)Hex(7)NeuAc(3)	N[+3226]	1330.17	3	3988.49	3988.51	0	-3.7	102	Specific	276.75	84.43	84.43	5.39	34	>sp|P19652|A1AG2_HUMAN Alpha-1-acid glycoprotein 2 OS=Homo sapiens OX=9606 GN=ORM2 PE=1 SV=2	4531	20210911_zy_urine_ethcd_1.1844.1844.3	controllerType=0 controllerNumber=1 scan=1844	8.4622
05925:3	55	R.MDGSLNFN[+2204.772]R.T	HexNAc(4)Hex(5)NeuAc(2)	N[+2205]	1086.75	3	3258.24	3258.25	0	-1.9	679	Specific	276.83	80.78	80.78	6.07	2	>sp|P02671|FIBA_HUMAN Fibrinogen alpha chain OS=Homo sapiens OX=9606 GN=FGA PE=1 SV=2	9171	20210911_zy_urine_ethcd_1.6507.6507.3	controllerType=0 controllerNumber=1 scan=6507	29.1839
01367:3	2	R.NEEYN[+2569.905]K.S	HexNAc(5)Hex(6)NeuAc(2)	N[+2570]	1122.75	3	3366.25	3366.25	0	-2	52	Specific	276.99	78.06	78.06	4.93	53	>sp|P02763|A1AG1_HUMAN Alpha-1-acid glycoprotein 1 OS=Homo sapiens OX=9606 GN=ORM1 PE=1 SV=1	2208	20210911_zy_urine_ethcd_1.1508.1508.3	controllerType=0 controllerNumber=1 scan=1508	7.002
11848:3	87	K.GSQWSDIEEFC[+57.021]N[+2204.772]R.S	HexNAc(4)Hex(5)NeuAc(2)	C[+57], N[+2205]	1278.15	3	3832.45	3832.45	0	-1.5	84	Specific	277.21	146.05	146.05	4.55	1	>sp|P08174|DAF_HUMAN Complement decay-accelerating factor OS=Homo sapiens OX=9606 GN=CD55 PE=1 SV=4	3955	20210911_zy_urine_ethcd_1.12998.12998.3	controllerType=0 controllerNumber=1 scan=12998	58.1439
00909:3	21	R.RN[+2350.830]MTQGR.C	HexNAc(4)Hex(5)Fuc(1)NeuAc(2)	N[+2351]	1071.76	3	3213.25	3213.26	0	-2.3	61	Specific	277.6	93.49	93.49	5.6	25	>sp|P07998|RNAS1_HUMAN Ribonuclease pancreatic OS=Homo sapiens OX=9606 GN=RNASE1 PE=1 SV=4	14690	20210911_zy_urine_ethcd_1.1005.1005.3	controllerType=0 controllerNumber=1 scan=1005	4.7222
09855:3	7	R.ADGTVNQIEGEATPVN[+2424.867]LTEPAK.L	HexNAc(5)Hex(6)Fuc(1)NeuAc(1)	N[+2425]	1560.33	3	4678.98	4678.99	0	-2.4	83	Specific	277.66	174.28	174.28	7.11	25	>sp|P05090|APOD_HUMAN Apolipoprotein D OS=Homo sapiens OX=9606 GN=APOD PE=1 SV=1	120	20210911_zy_urine_ethcd_1.10815.10815.3	controllerType=0 controllerNumber=1 scan=10815	48.4019
09007:3	17	R.LAGKPTHVN[+2350.830]VSVVM[+15.995]AEVDGTC[+57.021].Y	HexNAc(4)Hex(5)Fuc(1)NeuAc(2)	C[+57], M[+16], N[+2351]	1517.64	3	4550.9	4550.9	0	-1.7	332	CRagged	277.67	192.32	192.32	7.16	16	>sp|P01876|IGHA1_HUMAN Immunoglobulin heavy constant alpha 1 OS=Homo sapiens OX=9606 GN=IGHA1 PE=1 SV=2	9091	20210911_zy_urine_ethcd_1.9886.9886.3	controllerType=0 controllerNumber=1 scan=9886	44.2337
08165:4	3	K.ELHHLQEQN[+3007.058]VSNAFLDK.G	HexNAc(5)Hex(6)Fuc(1)NeuAc(3)	N[+3007]	1258.02	4	5029.06	5029.06	0	0.3	754	Specific	277.9	231.57	231.57	5.62	26	>sp|P00450|CERU_HUMAN Ceruloplasmin OS=Homo sapiens OX=9606 GN=CP PE=1 SV=1	460	20210911_zy_urine_ethcd_1.8963.8963.4	controllerType=0 controllerNumber=1 scan=8963	40.1155
04092:3	44	R.RN[+2350.830]FTAADWGQSR.D	HexNAc(4)Hex(5)Fuc(1)NeuAc(2)	N[+2351]	1253.84	3	3759.5	3759.5	0	-1.5	211	Specific	278.18	130.42	130.42	5.75	5	>sp|P12109|CO6A1_HUMAN Collagen alpha-1(VI) chain OS=Homo sapiens OX=9606 GN=COL6A1 PE=1 SV=3	962	20210911_zy_urine_ethcd_1.4496.4496.3	controllerType=0 controllerNumber=1 scan=4496	20.1154
07811:3	7	R.C[+57.021]IQAN[+2204.772]YSLMENGK.I	HexNAc(4)Hex(5)NeuAc(2)	C[+57], N[+2205]	1244.83	3	3732.47	3732.47	0	0.5	61	Specific	278.26	154.32	154.32	5.14	25	>sp|P05090|APOD_HUMAN Apolipoprotein D OS=Homo sapiens OX=9606 GN=APOD PE=1 SV=1	120	20210911_zy_urine_ethcd_1.8576.8576.3	controllerType=0 controllerNumber=1 scan=8576	38.4015
04366:3	34	R.EN[+1913.677]ISDPTSPLR.T	HexNAc(4)Hex(5)NeuAc(1)	N[+1914]	1048.1	3	3142.29	3142.29	0	-1.7	70	Specific	278.27	142.59	142.59	5.53	7	>sp|P01591|IGJ_HUMAN Immunoglobulin J chain OS=Homo sapiens OX=9606 GN=JCHAIN PE=1 SV=4	4401	20210911_zy_urine_ethcd_1.4797.4797.3	controllerType=0 controllerNumber=1 scan=4797	21.478
13391:3	1	R.FALLM[+15.995]TNC[+57.021]YATPSSN[+2204.772]ATDPLK.Y	HexNAc(4)Hex(5)NeuAc(2)	C[+57], M[+16], N[+2205]	1512.96	3	4536.85	4535.87	1	-5.2	499	Specific	278.53	175.21	175.21	6.8	49	>sp|P07911|UROM_HUMAN Uromodulin OS=Homo sapiens OX=9606 GN=UMOD PE=1 SV=1	16609	20210911_zy_urine_ethcd_1.14686.14686.3	controllerType=0 controllerNumber=1 scan=14686	65.6017
02500:3	10	R.EEQFN[+1768.640]STFR.V	HexNAc(4)Hex(5)Fuc(1)	N[+1769]	976.056	3	2926.15	2926.16	0	-3.3	172	Specific	278.75	119.29	119.29	5.8	27	>sp|P01859|IGHG2_HUMAN Immunoglobulin heavy constant gamma 2 OS=Homo sapiens OX=9606 GN=IGHG2 PE=1 SV=2	2858	20210911_zy_urine_ethcd_1.2747.2747.3	controllerType=0 controllerNumber=1 scan=2747	12.2584
02675:3	2	R.EN[+3517.228]GTISR.Y	HexNAc(6)Hex(7)NeuAc(4)	N[+3517]	1431.88	3	4293.61	4293.62	0	-1	102	Specific	279.05	32.15	32.15	4.3	53	>sp|P02763|A1AG1_HUMAN Alpha-1-acid glycoprotein 1 OS=Homo sapiens OX=9606 GN=ORM1 PE=1 SV=1	2208	20210911_zy_urine_ethcd_1.2940.2940.3	controllerType=0 controllerNumber=1 scan=2940	13.1188
05522:3	7	R.C[+57.021]IQAN[+1913.677]YSLMENGK.I	HexNAc(4)Hex(5)NeuAc(1)	C[+57], N[+1914]	1147.79	3	3441.36	3441.37	0	-2.6	61	Specific	279.17	133.72	118.77	5.96	25	>sp|P05090|APOD_HUMAN Apolipoprotein D OS=Homo sapiens OX=9606 GN=APOD PE=1 SV=1	120	20210911_zy_urine_ethcd_1.6065.6065.3	controllerType=0 controllerNumber=1 scan=6065	27.1888
05057:3	48	R.QAIHVGN[+1378.476]QTFNDGTIVEK.Y	HexNAc(2)Hex(6)	N[+1378]	1117.16	3	3349.46	3349.47	0	-1.5	340	Specific	279.75	212.61	212.61	6.77	3	>sp|Q9H3G5|CPVL_HUMAN Probable serine carboxypeptidase CPVL OS=Homo sapiens OX=9606 GN=CPVL PE=1 SV=2	298	20210911_zy_urine_ethcd_1.5555.5555.3	controllerType=0 controllerNumber=1 scan=5555	24.9066
07794:3	83	R.ISN[+2059.735]ITPADAGTYYC[+57.021]VK.F	HexNAc(4)Hex(5)Fuc(1)NeuAc(1)	C[+57], N[+2060]	1278.2	3	3832.58	3832.59	0	-1	107	Specific	279.95	167	167	4.63	2	>sp|Q5TFQ8|SIRBL_HUMAN Signal-regulatory protein beta-1 isoform 3 OS=Homo sapiens OX=9606 GN=SIRPB1 PE=1 SV=1	16238	20210911_zy_urine_ethcd_1.8557.8557.3	controllerType=0 controllerNumber=1 scan=8557	38.3189
03055:2	6	K.TPLTAN[+1897.682]ITK.S	HexNAc(4)Hex(4)Fuc(1)NeuAc(1)	N[+1898]	1428.62	2	2856.23	2856.24	0	-1.8	200	Specific	280.03	98.05	98.05	6.26	32	>sp|P01877|IGHA2_HUMAN Immunoglobulin heavy constant alpha 2 OS=Homo sapiens OX=9606 GN=IGHA2 PE=1 SV=4	10403	20210911_zy_urine_ethcd_1.3356.3356.2	controllerType=0 controllerNumber=1 scan=3356	14.934
04552:3	49	K.ANQQLN[+2935.037]FTEAK.E	HexNAc(6)Hex(7)NeuAc(2)	N[+2935]	1400.23	3	4198.67	4198.67	0	0.8	48	Specific	280.47	117.95	117.95	4.69	4	>sp|Q9Y5Y7|LYVE1_HUMAN Lymphatic vessel endothelial hyaluronic acid receptor 1 OS=Homo sapiens OX=9606 GN=LYVE1 PE=1 SV=2	9455	20210911_zy_urine_ethcd_1.5001.5001.3	controllerType=0 controllerNumber=1 scan=5001	22.3962
09163:3	24	R.ALGFEN[+2772.984]ATQALGR.A	HexNAc(6)Hex(6)NeuAc(2)	N[+2773]	1374.57	3	4121.71	4120.69	1	4.5	64	Specific	281.5	135.96	135.96	4.83	11	>sp|Q08380|LG3BP_HUMAN Galectin-3-binding protein OS=Homo sapiens OX=9606 GN=LGALS3BP PE=1 SV=1	4876	20210911_zy_urine_ethcd_1.10056.10056.3	controllerType=0 controllerNumber=1 scan=10056	44.9968
09677:4	1	R.C[+57.021]NTAAPMWLN[+3575.270]GTHPSSDEGIVSR.K	HexNAc(7)Hex(7)Fuc(1)NeuAc(3)	C[+57], N[+3575]	1519.35	4	6074.38	6075.4	-1	-3.9	223	Specific	282.24	171	171	7.51	49	>sp|P07911|UROM_HUMAN Uromodulin OS=Homo sapiens OX=9606 GN=UMOD PE=1 SV=1	16609	20210911_zy_urine_ethcd_1.10620.10620.4	controllerType=0 controllerNumber=1 scan=10620	47.5366
03167:3	22	K.LC[+57.021]SSVN[+1971.719]VSNEIK.S	HexNAc(5)Hex(5)Fuc(1)	C[+57], N[+1972]	1107.8	3	3321.38	3321.39	0	-3.1	2526	Specific	282.5	105.92	105.92	5.51	16	>sp|O60494|CUBN_HUMAN Cubilin OS=Homo sapiens OX=9606 GN=CUBN PE=1 SV=5	6499	20210911_zy_urine_ethcd_1.3479.3479.3	controllerType=0 controllerNumber=1 scan=3479	15.5016
08844:3	8	K.DIVEYYN[+2350.830]DSNGSHVLQGR.F	HexNAc(4)Hex(5)Fuc(1)NeuAc(2)	N[+2351]	1472.6	3	4415.78	4416.79	-1	-2.1	103	Specific	282.87	163.17	21.97	7.01	33	>sp|P25311|ZA2G_HUMAN Zinc-alpha-2-glycoprotein OS=Homo sapiens OX=9606 GN=AZGP1 PE=1 SV=2	18783	20210911_zy_urine_ethcd_1.9707.9707.3	controllerType=0 controllerNumber=1 scan=9707	43.4323
14834:3	2	R.QDQC[+57.021]IYN[+3007.058]TTYLNVQR.E	HexNAc(5)Hex(6)Fuc(1)NeuAc(3)	C[+57], N[+3007]	1641.65	3	4922.94	4922.95	0	-2.5	87	Specific	283.43	157.6	157.6	6.72	53	>sp|P02763|A1AG1_HUMAN Alpha-1-acid glycoprotein 1 OS=Homo sapiens OX=9606 GN=ORM1 PE=1 SV=1	2208	20210911_zy_urine_ethcd_1.16263.16263.3	controllerType=0 controllerNumber=1 scan=16263	72.501
10743:3	2	R.QDQC[+57.021]IYN[+2204.772]TTYLNVQR.E	HexNAc(4)Hex(5)NeuAc(2)	C[+57], N[+2205]	1374.23	3	4120.67	4120.67	0	-0.7	87	Specific	283.45	153.76	153.76	6.45	53	>sp|P02763|A1AG1_HUMAN Alpha-1-acid glycoprotein 1 OS=Homo sapiens OX=9606 GN=ORM1 PE=1 SV=1	2208	20210911_zy_urine_ethcd_1.11787.11787.3	controllerType=0 controllerNumber=1 scan=11787	52.7047
08189:3	12	R.ITYSIVQTN[+2861.000]C[+57.021]SK.E	HexNAc(5)Hex(6)NeuAc(3)	C[+57], N[+2861]	1425.24	3	4273.7	4274.7	-1	-0.4	197	Specific	284.01	105.99	105.99	5.27	26	>sp|P01042|KNG1_HUMAN Kininogen-1 OS=Homo sapiens OX=9606 GN=KNG1 PE=1 SV=2	6533	20210911_zy_urine_ethcd_1.8989.8989.3	controllerType=0 controllerNumber=1 scan=8989	40.2331
07434:3	31	K.NYHQPAILN[+2553.910]SSALR.Q	HexNAc(5)Hex(5)Fuc(1)NeuAc(2)	N[+2554]	1379.91	3	4137.72	4137.74	0	-3.3	41	Specific	284.02	122.81	122.81	5.78	5	>sp|Q16769|QPCT_HUMAN Glutaminyl-peptide cyclotransferase OS=Homo sapiens OX=9606 GN=QPCT PE=1 SV=1	12985	20210911_zy_urine_ethcd_1.8163.8163.3	controllerType=0 controllerNumber=1 scan=8163	36.5496
03199:3	100	K.N[+2350.830]ISIESR.E	HexNAc(4)Hex(5)Fuc(1)NeuAc(2)	N[+2351]	1057.09	3	3169.26	3169.27	0	-2.2	80	Specific	284.2	59.81	59.81	3.21	3	>sp|Q6UWI2|PARM1_HUMAN Prostate androgen-regulated mucin-like protein 1 OS=Homo sapiens OX=9606 GN=PARM1 PE=1 SV=1	13736	20210911_zy_urine_ethcd_1.3514.3514.3	controllerType=0 controllerNumber=1 scan=3514	15.6622
00832:3	18	R.HN[+2141.788]STGC[+57.021]LR.M	HexNAc(6)Hex(3)Fuc(1)NeuAc(1)	C[+57], N[+2142]	1029.41	3	3086.21	3086.22	0	-4.4	290	Specific	284.42	94.76	94.76	5.34	18	>sp|P10909|CLUS_HUMAN Clusterin OS=Homo sapiens OX=9606 GN=CLU PE=1 SV=1	6125	20210911_zy_urine_ethcd_1.921.921.3	controllerType=0 controllerNumber=1 scan=921	4.336
03367:3	32	R.SLHVPGLN[+2424.867]K.T	HexNAc(5)Hex(6)Fuc(1)NeuAc(1)	N[+2425]	1130.48	3	3389.41	3389.42	0	-3	191	Specific	284.5	93.9	93.9	5.88	7	>sp|P30530|UFO_HUMAN Tyrosine-protein kinase receptor UFO OS=Homo sapiens OX=9606 GN=AXL PE=1 SV=4	18964	20210911_zy_urine_ethcd_1.3699.3699.3	controllerType=0 controllerNumber=1 scan=3699	16.5046
07403:3	73	R.GTAGNALMDGASQLM[+15.995]GEN[+1913.677]R.T	HexNAc(4)Hex(5)NeuAc(1)	M[+16], N[+1914]	1274.85	3	3822.53	3822.53	0	-0.3	377	Specific	284.71	157.83	132.29	4.13	2	>sp|P02675|FIBB_HUMAN Fibrinogen beta chain OS=Homo sapiens OX=9606 GN=FGB PE=1 SV=2	6006	20210911_zy_urine_ethcd_1.8129.8129.3	controllerType=0 controllerNumber=1 scan=8129	36.3994
02076:3	10	K.PREEQFN[+1444.534]STFR.V	HexNAc(4)Hex(3)Fuc(1)	N[+1445]	952.405	3	2855.2	2855.21	0	-3.7	170	Specific	285.14	194.15	194.15	4.52	27	>sp|P01859|IGHG2_HUMAN Immunoglobulin heavy constant gamma 2 OS=Homo sapiens OX=9606 GN=IGHG2 PE=1 SV=2	2858	20210911_zy_urine_ethcd_1.2283.2283.3	controllerType=0 controllerNumber=1 scan=2283	10.2812
04676:3	44	R.N[+2059.735]FTAADWGQSR.D	HexNAc(4)Hex(5)Fuc(1)NeuAc(1)	N[+2060]	1104.77	3	3312.3	3312.31	0	-2.5	212	Specific	285.14	117.13	117.13	5.45	5	>sp|P12109|CO6A1_HUMAN Collagen alpha-1(VI) chain OS=Homo sapiens OX=9606 GN=COL6A1 PE=1 SV=3	962	20210911_zy_urine_ethcd_1.5137.5137.3	controllerType=0 controllerNumber=1 scan=5137	23.0142
01654:3	4	R.EN[+3226.132]GTVSR.Y	HexNAc(6)Hex(7)NeuAc(3)	N[+3226]	1330.17	3	3988.5	3988.51	0	-0.4	102	Specific	285.39	96.42	96.42	4.74	34	>sp|P19652|A1AG2_HUMAN Alpha-1-acid glycoprotein 2 OS=Homo sapiens OX=9606 GN=ORM2 PE=1 SV=2	4531	20210911_zy_urine_ethcd_1.1822.1822.3	controllerType=0 controllerNumber=1 scan=1822	8.3673
02604:3	6	K.HYTN[+2407.852]SSQDVTVPC[+57.021]R.V	HexNAc(5)Hex(5)NeuAc(2)	C[+57], N[+2408]	1357.87	3	4071.59	4071.6	0	-3.2	89	Specific	285.49	112.54	112.54	5.83	32	>sp|P01877|IGHA2_HUMAN Immunoglobulin heavy constant alpha 2 OS=Homo sapiens OX=9606 GN=IGHA2 PE=1 SV=4	10403	20210911_zy_urine_ethcd_1.2862.2862.3	controllerType=0 controllerNumber=1 scan=2862	12.7739
02816:3	2	R.EN[+3663.286]GTISR.Y	HexNAc(6)Hex(7)Fuc(1)NeuAc(4)	N[+3663]	1480.56	3	4439.67	4439.68	0	-1.2	102	Specific	285.62	31.23	31.23	4.47	53	>sp|P02763|A1AG1_HUMAN Alpha-1-acid glycoprotein 1 OS=Homo sapiens OX=9606 GN=ORM1 PE=1 SV=1	2208	20210911_zy_urine_ethcd_1.3094.3094.2	controllerType=0 controllerNumber=1 scan=3094	13.8008
15073:3	45	K.EFGFAWPESLN[+2350.830]C[+57.021]SK.F	HexNAc(4)Hex(5)Fuc(1)NeuAc(2)	C[+57], N[+2351]	1341.53	3	4022.56	4022.58	0	-3.2	134	Specific	285.65	139.18	139.18	5.7	5	>sp|Q9ULV1|FZD4_HUMAN Frizzled-4 OS=Homo sapiens OX=9606 GN=FZD4 PE=1 SV=2	20281	20210911_zy_urine_ethcd_1.16525.16525.3	controllerType=0 controllerNumber=1 scan=16525	73.6615
11831:3	87	K.GSQWSDIEEFC[+57.021]N[+2204.772]R.S	HexNAc(4)Hex(5)NeuAc(2)	C[+57], N[+2205]	1278.15	3	3832.44	3832.45	0	-2.6	84	Specific	285.73	114.31	114.31	4.64	1	>sp|P08174|DAF_HUMAN Complement decay-accelerating factor OS=Homo sapiens OX=9606 GN=CD55 PE=1 SV=4	3955	20210911_zy_urine_ethcd_1.12979.12979.3	controllerType=0 controllerNumber=1 scan=12979	58.0562
01099:3	18	R.HN[+2391.857]STGC[+57.021]LR.M	HexNAc(5)Hex(4)Fuc(1)NeuAc(2)	C[+57], N[+2392]	1112.77	3	3336.28	3336.29	0	-2.8	290	Specific	285.9	109.51	109.51	4.94	18	>sp|P10909|CLUS_HUMAN Clusterin OS=Homo sapiens OX=9606 GN=CLU PE=1 SV=1	6125	20210911_zy_urine_ethcd_1.1213.1213.3	controllerType=0 controllerNumber=1 scan=1213	5.6427
06404:3	51	R.GLN[+2204.772]VTLSSTGR.N	HexNAc(4)Hex(5)NeuAc(2)	N[+2205]	1103.79	3	3309.37	3309.37	0	-2.4	1326	Specific	286.14	115.89	115.89	5.45	2	>sp|P0C0L5|CO4B_HUMAN Complement C4-B OS=Homo sapiens OX=9606 GN=C4B PE=1 SV=2	4060	20210911_zy_urine_ethcd_1.7032.7032.3	controllerType=0 controllerNumber=1 scan=7032	31.518
04117:3	54	R.KFDVNQLQN[+1727.613]TTIK.R	HexNAc(3)Hex(6)Fuc(1)	N[+1728]	1092.82	3	3276.44	3276.45	0	-1.9	706	Specific	286.54	165.14	165.14	5.71	5	>sp|P12821|ACE_HUMAN Angiotensin-converting enzyme OS=Homo sapiens OX=9606 GN=ACE PE=1 SV=1	527	20210911_zy_urine_ethcd_1.4523.4523.3	controllerType=0 controllerNumber=1 scan=4523	20.2376
00912:2	2	R.NEEYN[+1913.677]K.S	HexNAc(4)Hex(5)NeuAc(1)	N[+1914]	1355.51	2	2710.02	2710.02	0	-1.1	52	Specific	286.62	59.73	59.73	4.59	53	>sp|P02763|A1AG1_HUMAN Alpha-1-acid glycoprotein 1 OS=Homo sapiens OX=9606 GN=ORM1 PE=1 SV=1	2208	20210911_zy_urine_ethcd_1.1009.1009.2	controllerType=0 controllerNumber=1 scan=1009	4.7372
11539:3	3	K.EN[+2059.735]LTAPGSDSAVFFEQGTTR.I	HexNAc(4)Hex(5)Fuc(1)NeuAc(1)	N[+2060]	1396.58	3	4187.73	4186.73	1	-0.7	396	Specific	286.92	161.14	161.14	5.86	26	>sp|P00450|CERU_HUMAN Ceruloplasmin OS=Homo sapiens OX=9606 GN=CP PE=1 SV=1	460	20210911_zy_urine_ethcd_1.12659.12659.3	controllerType=0 controllerNumber=1 scan=12659	56.5993
12014:3	7	R.ADGTVNQIEGEATPVN[+2350.830]LTEPAK.L	HexNAc(4)Hex(5)Fuc(1)NeuAc(2)	N[+2351]	1535.32	3	4603.94	4604.95	-1	-2.2	83	Specific	287.21	197.59	60.63	7.46	25	>sp|P05090|APOD_HUMAN Apolipoprotein D OS=Homo sapiens OX=9606 GN=APOD PE=1 SV=1	120	20210911_zy_urine_ethcd_1.13180.13180.3	controllerType=0 controllerNumber=1 scan=13180	58.9665
02082:3	2	R.EN[+3372.190]GTISR.Y	HexNAc(6)Hex(7)Fuc(1)NeuAc(3)	N[+3372]	1383.53	3	4148.58	4148.58	0	-0.1	102	Specific	287.34	29.48	29.48	4.01	53	>sp|P02763|A1AG1_HUMAN Alpha-1-acid glycoprotein 1 OS=Homo sapiens OX=9606 GN=ORM1 PE=1 SV=1	2208	20210911_zy_urine_ethcd_1.2289.2289.3	controllerType=0 controllerNumber=1 scan=2289	10.3061
05186:3	77	R.N[+1378.476]M[+15.995]SNQLGLLAVNQR.F	HexNAc(2)Hex(6)	M[+16], N[+1378]	984.765	3	2952.28	2952.29	0	-1.9	355	Specific	287.87	179.57	179.57	4.7	2	>sp|P05164|PERM_HUMAN Myeloperoxidase OS=Homo sapiens OX=9606 GN=MPO PE=1 SV=1	17111	20210911_zy_urine_ethcd_1.5697.5697.3	controllerType=0 controllerNumber=1 scan=5697	25.5427
01541:3	11	R.GHVN[+2204.772]ITR.S	HexNAc(4)Hex(5)NeuAc(2)	N[+2205]	1001.07	3	3001.21	3001.21	0	-2.8	118	Specific	288	116.51	116.51	5.43	13	>sp|P00734|THRB_HUMAN Prothrombin OS=Homo sapiens OX=9606 GN=F2 PE=1 SV=2	18404	20210911_zy_urine_ethcd_1.1699.1699.3	controllerType=0 controllerNumber=1 scan=1699	7.8433
06106:3	12	R.ITYSIVQTN[+2715.963]C[+57.021]SK.E	HexNAc(5)Hex(6)Fuc(1)NeuAc(2)	C[+57], N[+2716]	1377.22	3	4129.65	4129.67	0	-3.3	197	Specific	288.54	137.5	137.5	5.46	26	>sp|P01042|KNG1_HUMAN Kininogen-1 OS=Homo sapiens OX=9606 GN=KNG1 PE=1 SV=2	6533	20210911_zy_urine_ethcd_1.6705.6705.3	controllerType=0 controllerNumber=1 scan=6705	30.0739
04011:4	19	K.NLFLN[+1913.677]HSEN[+2204.772]ATAK.D	HexNAc(4)Hex(5)NeuAc(1),HexNAc(4)Hex(5)NeuAc(2)	N[+1914][+2205]	1395.05	4	5577.18	5577.18	0	-1.4	203	Specific	288.55	288.55	5.07	5.44	20	>sp|P00738|HPT_HUMAN Haptoglobin OS=Homo sapiens OX=9606 GN=HP PE=1 SV=1	3044	20210911_zy_urine_ethcd_1.4407.4407.4	controllerType=0 controllerNumber=1 scan=4407	19.7099
13949:4	2	R.QDQC[+57.021]IYN[+3517.228]TTYLNVQR.E	HexNAc(6)Hex(7)NeuAc(4)	C[+57], N[+3517]	1359.03	4	5433.12	5433.12	0	-1.2	87	Specific	289.31	140.18	140.18	6.97	53	>sp|P02763|A1AG1_HUMAN Alpha-1-acid glycoprotein 1 OS=Homo sapiens OX=9606 GN=ORM1 PE=1 SV=1	2208	20210911_zy_urine_ethcd_1.15296.15296.4	controllerType=0 controllerNumber=1 scan=15296	68.2748
02751:2	27	K.FLN[+2059.735]ESYK.H	HexNAc(4)Hex(5)Fuc(1)NeuAc(1)	N[+2060]	1480.59	2	2960.18	2960.18	0	-1.4	92	Specific	289.32	112.41	112.41	5.38	13	>sp|P15309|PPAP_HUMAN Prostatic acid phosphatase OS=Homo sapiens OX=9606 GN=ACPP PE=1 SV=3	14195	20210911_zy_urine_ethcd_1.3023.3023.2	controllerType=0 controllerNumber=1 scan=3023	13.4808
06056:3	34	R.EN[+2350.830]ISDPTSPLR.T	HexNAc(4)Hex(5)Fuc(1)NeuAc(2)	N[+2351]	1193.82	3	3579.44	3579.45	0	-1.2	70	Specific	289.36	135.92	135.92	5.35	7	>sp|P01591|IGJ_HUMAN Immunoglobulin J chain OS=Homo sapiens OX=9606 GN=JCHAIN PE=1 SV=4	4401	20210911_zy_urine_ethcd_1.6651.6651.3	controllerType=0 controllerNumber=1 scan=6651	29.8263
12773:3	2	R.QDQC[+57.021]IYN[+2204.772]TTYLNVQR.E	HexNAc(4)Hex(5)NeuAc(2)	C[+57], N[+2205]	1374.22	3	4120.66	4120.67	0	-3.1	87	Specific	289.61	154.67	154.67	6.48	53	>sp|P02763|A1AG1_HUMAN Alpha-1-acid glycoprotein 1 OS=Homo sapiens OX=9606 GN=ORM1 PE=1 SV=1	2208	20210911_zy_urine_ethcd_1.14010.14010.3	controllerType=0 controllerNumber=1 scan=14010	62.6302
02055:3	2	R.EN[+3007.058]GTISR.Y	HexNAc(5)Hex(6)Fuc(1)NeuAc(3)	N[+3007]	1261.82	3	3783.44	3783.45	0	-2.9	102	Specific	289.85	31.2	31.2	4.31	53	>sp|P02763|A1AG1_HUMAN Alpha-1-acid glycoprotein 1 OS=Homo sapiens OX=9606 GN=ORM1 PE=1 SV=1	2208	20210911_zy_urine_ethcd_1.2260.2260.3	controllerType=0 controllerNumber=1 scan=2260	10.186
08749:3	45	R.ISMC[+57.021]QNLGYN[+2350.830]VTK.M	HexNAc(4)Hex(5)Fuc(1)NeuAc(2)	C[+57], N[+2351]	1293.52	3	3878.55	3878.56	0	-2.1	50	Specific	290.18	117.43	117.43	6.12	5	>sp|Q9ULV1|FZD4_HUMAN Frizzled-4 OS=Homo sapiens OX=9606 GN=FZD4 PE=1 SV=2	20281	20210911_zy_urine_ethcd_1.9602.9602.3	controllerType=0 controllerNumber=1 scan=9602	42.9471
10771:3	1	R.C[+57.021]NTAAPMWLN[+2407.852]GTHPSSDEGIVSR.K	HexNAc(5)Hex(5)NeuAc(2)	C[+57], N[+2408]	1636.67	3	4907.98	4907.99	0	-0.6	223	Specific	290.4	178.82	151.37	7.16	49	>sp|P07911|UROM_HUMAN Uromodulin OS=Homo sapiens OX=9606 GN=UMOD PE=1 SV=1	16609	20210911_zy_urine_ethcd_1.11817.11817.3	controllerType=0 controllerNumber=1 scan=11817	52.8383
09795:3	9	K.C[+57.021]GLVPVLAENYN[+2059.735]K.S	HexNAc(4)Hex(5)Fuc(1)NeuAc(1)	C[+57], N[+2060]	1179.5	3	3536.49	3536.49	0	0.4	421	Specific	290.85	181.46	181.46	5.18	20	>sp|P02787|TRFE_HUMAN Serotransferrin OS=Homo sapiens OX=9606 GN=TF PE=1 SV=3	18223	20210911_zy_urine_ethcd_1.10749.10749.3	controllerType=0 controllerNumber=1 scan=10749	48.1135
03881:3	26	K.IDSTGN[+1872.651]VTNELR.V	HexNAc(3)Hex(6)NeuAc(1)	N[+1873]	1064.44	3	3191.3	3191.31	0	-2.1	411	Specific	291.39	112.63	112.63	5.88	11	>sp|O75882|ATRN_HUMAN Attractin OS=Homo sapiens OX=9606 GN=ATRN PE=1 SV=2	8160	20210911_zy_urine_ethcd_1.4264.4264.3	controllerType=0 controllerNumber=1 scan=4264	19.0604
13771:4	2	R.QDQC[+57.021]IYN[+4028.418]TTYLNVQR.E	HexNAc(7)Hex(8)Fuc(1)NeuAc(4)	C[+57], N[+4028]	1486.58	4	5943.3	5944.31	-1	-1.2	87	Specific	291.48	159.36	159.36	7.12	53	>sp|P02763|A1AG1_HUMAN Alpha-1-acid glycoprotein 1 OS=Homo sapiens OX=9606 GN=ORM1 PE=1 SV=1	2208	20210911_zy_urine_ethcd_1.15101.15101.4	controllerType=0 controllerNumber=1 scan=15101	67.4345
03507:3	13	K.WN[+2262.814]NTGC[+57.021]QALPSQDEGPSK.A	HexNAc(5)Hex(5)Fuc(1)NeuAc(1)	C[+57], N[+2263]	1417.9	3	4251.68	4251.69	0	-3.5	498	Specific	291.87	179.37	179.37	6.39	16	>sp|P01833|PIGR_HUMAN Polymeric immunoglobulin receptor OS=Homo sapiens OX=9606 GN=PIGR PE=1 SV=4	10083	20210911_zy_urine_ethcd_1.3853.3853.3	controllerType=0 controllerNumber=1 scan=3853	17.2062
04982:4	3	K.ELHHLQEQN[+1913.677]VSNAFLDK.G	HexNAc(4)Hex(5)NeuAc(1)	N[+1914]	984.675	4	3935.68	3935.68	0	-0.6	754	Specific	292.77	204.82	204.82	5.91	26	>sp|P00450|CERU_HUMAN Ceruloplasmin OS=Homo sapiens OX=9606 GN=CP PE=1 SV=1	460	20210911_zy_urine_ethcd_1.5473.5473.4	controllerType=0 controllerNumber=1 scan=5473	24.538
13078:3	9	K.C[+57.021]GLVPVLAENYN[+2204.772]K.S	HexNAc(4)Hex(5)NeuAc(2)	C[+57], N[+2205]	1227.84	3	3681.52	3681.52	0	-2.2	421	Specific	292.83	150.87	150.87	6.06	20	>sp|P02787|TRFE_HUMAN Serotransferrin OS=Homo sapiens OX=9606 GN=TF PE=1 SV=3	18223	20210911_zy_urine_ethcd_1.14344.14344.3	controllerType=0 controllerNumber=1 scan=14344	64.1034
04297:3	6	K.TPLTAN[+2553.910]ITK.S	HexNAc(5)Hex(5)Fuc(1)NeuAc(2)	N[+2554]	1171.49	3	3512.46	3512.47	0	-1.9	200	Specific	292.94	141.29	141.29	6.11	32	>sp|P01877|IGHA2_HUMAN Immunoglobulin heavy constant alpha 2 OS=Homo sapiens OX=9606 GN=IGHA2 PE=1 SV=4	10403	20210911_zy_urine_ethcd_1.4721.4721.3	controllerType=0 controllerNumber=1 scan=4721	21.1331
12887:3	2	R.QDQC[+57.021]IYN[+2204.772]TTYLNVQR.E	HexNAc(4)Hex(5)NeuAc(2)	C[+57], N[+2205]	1374.56	3	4121.68	4120.67	1	1.2	87	Specific	293.61	151.61	151.61	5.94	53	>sp|P02763|A1AG1_HUMAN Alpha-1-acid glycoprotein 1 OS=Homo sapiens OX=9606 GN=ORM1 PE=1 SV=1	2208	20210911_zy_urine_ethcd_1.14135.14135.3	controllerType=0 controllerNumber=1 scan=14135	63.1799
01330:2	2	R.NEEYN[+1548.545]K.S	HexNAc(3)Hex(4)NeuAc(1)	N[+1549]	1172.95	2	2344.89	2344.89	0	-1.9	52	Specific	294.35	150.98	150.98	5.04	53	>sp|P02763|A1AG1_HUMAN Alpha-1-acid glycoprotein 1 OS=Homo sapiens OX=9606 GN=ORM1 PE=1 SV=1	2208	20210911_zy_urine_ethcd_1.1468.1468.2	controllerType=0 controllerNumber=1 scan=1468	6.826
02803:3	2	R.EN[+3663.286]GTISR.Y	HexNAc(6)Hex(7)Fuc(1)NeuAc(4)	N[+3663]	1480.56	3	4439.67	4439.68	0	-1.7	102	Specific	294.71	31.3	31.3	4.64	53	>sp|P02763|A1AG1_HUMAN Alpha-1-acid glycoprotein 1 OS=Homo sapiens OX=9606 GN=ORM1 PE=1 SV=1	2208	20210911_zy_urine_ethcd_1.3080.3080.3	controllerType=0 controllerNumber=1 scan=3080	13.7358
02242:3	10	R.EEQFN[+1768.640]STFR.V	HexNAc(4)Hex(5)Fuc(1)	N[+1769]	976.056	3	2926.15	2926.16	0	-2.8	172	Specific	294.79	144.7	144.7	5.97	27	>sp|P01859|IGHG2_HUMAN Immunoglobulin heavy constant gamma 2 OS=Homo sapiens OX=9606 GN=IGHG2 PE=1 SV=2	2858	20210911_zy_urine_ethcd_1.2464.2464.3	controllerType=0 controllerNumber=1 scan=2464	11.0516
01636:3	106	R.EQN[+2059.735]ETDIK.H	HexNAc(4)Hex(5)Fuc(1)NeuAc(1)	N[+2060]	1012.73	3	3036.19	3036.19	0	-2.4	199	Specific	294.83	27.29	27.29	2.28	8	>sp|O43283|M3K13_HUMAN Mitogen-activated protein kinase kinase kinase 13 OS=Homo sapiens OX=9606 GN=MAP3K13 PE=1 SV=1	9667	20210911_zy_urine_ethcd_1.1802.1802.3	controllerType=0 controllerNumber=1 scan=1802	8.2837
06098:3	34	R.EN[+2204.772]ISDPTSPLR.T	HexNAc(4)Hex(5)NeuAc(2)	N[+2205]	1145.13	3	3433.38	3433.39	0	-1.4	70	Specific	295.06	148.13	148.13	5.34	7	>sp|P01591|IGJ_HUMAN Immunoglobulin J chain OS=Homo sapiens OX=9606 GN=JCHAIN PE=1 SV=4	4401	20210911_zy_urine_ethcd_1.6697.6697.3	controllerType=0 controllerNumber=1 scan=6697	30.0354
04385:3	12	R.ITYSIVQTN[+2100.761]C[+57.021]SK.E	HexNAc(5)Hex(4)Fuc(1)NeuAc(1)	C[+57], N[+2101]	1172.16	3	3514.46	3514.47	0	-2.9	197	Specific	295.27	170.96	170.96	5.43	26	>sp|P01042|KNG1_HUMAN Kininogen-1 OS=Homo sapiens OX=9606 GN=KNG1 PE=1 SV=2	6533	20210911_zy_urine_ethcd_1.4818.4818.3	controllerType=0 controllerNumber=1 scan=4818	21.5741
13893:3	2	R.QDQC[+57.021]IYN[+2188.740]TTYLNVQR.E	HexNAc(2)Hex(11)	C[+57], N[+2189]	1368.55	3	4103.63	4104.64	-1	-0.5	87	Specific	295.54	137.9	137.9	6.63	53	>sp|P02763|A1AG1_HUMAN Alpha-1-acid glycoprotein 1 OS=Homo sapiens OX=9606 GN=ORM1 PE=1 SV=1	2208	20210911_zy_urine_ethcd_1.15235.15235.3	controllerType=0 controllerNumber=1 scan=15235	68.0107
07279:3	12	K.LNAENN[+2100.761]ATFYFK.I	HexNAc(5)Hex(4)Fuc(1)NeuAc(1)	N[+2101]	1178.15	3	3532.45	3532.45	0	-0.4	289	Specific	295.78	133.12	133.12	5.06	26	>sp|P01042|KNG1_HUMAN Kininogen-1 OS=Homo sapiens OX=9606 GN=KNG1 PE=1 SV=2	6533	20210911_zy_urine_ethcd_1.7993.7993.3	controllerType=0 controllerNumber=1 scan=7993	35.7886
14736:4	2	R.QDQC[+57.021]IYN[+3007.058]TTYLNVQR.E	HexNAc(5)Hex(6)Fuc(1)NeuAc(3)	C[+57], N[+3007]	1231.49	4	4922.95	4922.95	0	-1.4	87	Specific	296.26	179.51	179.51	6.94	53	>sp|P02763|A1AG1_HUMAN Alpha-1-acid glycoprotein 1 OS=Homo sapiens OX=9606 GN=ORM1 PE=1 SV=1	2208	20210911_zy_urine_ethcd_1.16156.16156.4	controllerType=0 controllerNumber=1 scan=16156	72.0349
06922:3	56	R.LHNQLLPN[+2627.947]VTTVER.N	HexNAc(6)Hex(6)Fuc(1)NeuAc(1)	N[+2628]	1421.28	3	4261.83	4261.85	0	-3.3	504	Specific	296.31	144.23	144.23	5.77	5	>sp|P19440|GGT1_HUMAN Glutathione hydrolase 1 proenzyme OS=Homo sapiens OX=9606 GN=GGT1 PE=1 SV=2	20028	20210911_zy_urine_ethcd_1.7602.7602.3	controllerType=0 controllerNumber=1 scan=7602	34.0553
06093:3	12	R.ITYSIVQTN[+2715.963]C[+57.021]SK.E	HexNAc(5)Hex(6)Fuc(1)NeuAc(2)	C[+57], N[+2716]	1377.22	3	4129.66	4129.67	0	-1.5	197	Specific	296.91	134.35	134.35	5.65	26	>sp|P01042|KNG1_HUMAN Kininogen-1 OS=Homo sapiens OX=9606 GN=KNG1 PE=1 SV=2	6533	20210911_zy_urine_ethcd_1.6691.6691.3	controllerType=0 controllerNumber=1 scan=6691	30.009
02393:3	47	K.MFSQN[+2350.830]DTR.C	HexNAc(4)Hex(5)Fuc(1)NeuAc(2)	N[+2351]	1117.09	3	3349.26	3349.27	0	-2.2	321	Specific	297.27	96.74	96.74	5.5	5	>sp|P02750|A2GL_HUMAN Leucine-rich alpha-2-glycoprotein OS=Homo sapiens OX=9606 GN=LRG1 PE=1 SV=2	1095	20210911_zy_urine_ethcd_1.2629.2629.3	controllerType=0 controllerNumber=1 scan=2629	11.7695
03371:3	32	R.SLHVPGLN[+2059.735]K.T	HexNAc(4)Hex(5)Fuc(1)NeuAc(1)	N[+2060]	1008.77	3	3024.28	3024.29	0	-2.8	191	Specific	297.46	108.36	108.36	5.61	7	>sp|P30530|UFO_HUMAN Tyrosine-protein kinase receptor UFO OS=Homo sapiens OX=9606 GN=AXL PE=1 SV=4	18964	20210911_zy_urine_ethcd_1.3704.3704.3	controllerType=0 controllerNumber=1 scan=3704	16.5253
10087:3	4	R.QNQC[+57.021]FYN[+2935.037]SSYLNVQR.E	HexNAc(6)Hex(7)NeuAc(2)	C[+57], N[+2935]	1619.3	3	4855.89	4855.9	0	-2.5	87	Specific	297.58	176.6	176.6	6.7	34	>sp|P19652|A1AG2_HUMAN Alpha-1-acid glycoprotein 2 OS=Homo sapiens OX=9606 GN=ORM2 PE=1 SV=2	4531	20210911_zy_urine_ethcd_1.11069.11069.3	controllerType=0 controllerNumber=1 scan=11069	49.529
08247:3	7	R.ADGTVNQIEGEATPVN[+1622.582]LTEPAK.L	HexNAc(4)Hex(5)	N[+1623]	1292.9	3	3876.7	3876.7	0	-0.7	83	Specific	297.67	223.28	223.28	6.93	25	>sp|P05090|APOD_HUMAN Apolipoprotein D OS=Homo sapiens OX=9606 GN=APOD PE=1 SV=1	120	20210911_zy_urine_ethcd_1.9053.9053.3	controllerType=0 controllerNumber=1 scan=9053	40.5138
08980:4	27	R.N[+1378.476]ETQHEPYPLM[+15.995]LPGC[+57.021]SPSC[+57.021]PLER.F	HexNAc(2)Hex(6)	C[+57]*2, M[+16], N[+1378]	1027.43	4	4106.68	4106.69	0	-2.7	333	Specific	297.71	247.27	247.27	7.41	13	>sp|P15309|PPAP_HUMAN Prostatic acid phosphatase OS=Homo sapiens OX=9606 GN=ACPP PE=1 SV=3	14195	20210911_zy_urine_ethcd_1.9856.9856.4	controllerType=0 controllerNumber=1 scan=9856	44.1009
03975:3	26	R.N[+2059.735]HSC[+57.021]SEGQISIFR.Y	HexNAc(4)Hex(5)Fuc(1)NeuAc(1)	C[+57], N[+2060]	1198.82	3	3594.43	3594.44	0	-2.6	731	Specific	297.76	75.15	75.15	5.97	11	>sp|O75882|ATRN_HUMAN Attractin OS=Homo sapiens OX=9606 GN=ATRN PE=1 SV=2	8160	20210911_zy_urine_ethcd_1.4367.4367.3	controllerType=0 controllerNumber=1 scan=4367	19.5286
05258:5	5	K.NC[+57.021]HHSGSQVPLIHC[+57.021]N[+2100.761]LTTPSPQN[+2133.772]ISNC[+57.021]R.Y	HexNAc(5)Hex(4)Fuc(1)NeuAc(1),HexNAc(5)Hex(6)Fuc(1)	C[+57]*3, N[+2101][+2134]	1493.61	5	7464.02	7463.02	1	-0.6	97	Specific	298.7	236.2	9.75	7.2	16	>sp|P10153|RNAS2_HUMAN Non-secretory ribonuclease OS=Homo sapiens OX=9606 GN=RNASE2 PE=1 SV=2	14694	20210911_zy_urine_ethcd_1.5776.5776.5	controllerType=0 controllerNumber=1 scan=5776	25.898
10492:4	2	R.QDQC[+57.021]IYN[+2935.037]TTYLNVQR.E	HexNAc(6)Hex(7)NeuAc(2)	C[+57], N[+2935]	1213.49	4	4850.93	4850.93	0	-1.6	87	Specific	299.03	154.26	154.26	6.96	53	>sp|P02763|A1AG1_HUMAN Alpha-1-acid glycoprotein 1 OS=Homo sapiens OX=9606 GN=ORM1 PE=1 SV=1	2208	20210911_zy_urine_ethcd_1.11512.11512.4	controllerType=0 controllerNumber=1 scan=11512	51.4851
10724:3	2	R.QDQC[+57.021]IYN[+2715.963]TTYLNVQR.E	HexNAc(5)Hex(6)Fuc(1)NeuAc(2)	C[+57], N[+2716]	1544.62	3	4631.85	4631.86	0	-1.4	87	Specific	299.53	154.18	154.18	6.67	53	>sp|P02763|A1AG1_HUMAN Alpha-1-acid glycoprotein 1 OS=Homo sapiens OX=9606 GN=ORM1 PE=1 SV=1	2208	20210911_zy_urine_ethcd_1.11766.11766.3	controllerType=0 controllerNumber=1 scan=11766	52.6112
15013:3	1	K.QDFN[+3372.190]ITDISLLEHR.L	HexNAc(6)Hex(7)Fuc(1)NeuAc(3)	N[+3372]	1691.69	3	5073.04	5073.05	0	-1.2	319	Specific	299.98	115.48	115.48	6.02	49	>sp|P07911|UROM_HUMAN Uromodulin OS=Homo sapiens OX=9606 GN=UMOD PE=1 SV=1	16609	20210911_zy_urine_ethcd_1.16459.16459.3	controllerType=0 controllerNumber=1 scan=16459	73.3663
01121:3	15	K.N[+2059.735]NSDISSTR.G	HexNAc(4)Hex(5)Fuc(1)NeuAc(1)	N[+2060]	1018.4	3	3053.19	3053.19	0	-2.1	46	Specific	300.25	146.51	146.51	6.12	12	>sp|P01871|IGHM_HUMAN Immunoglobulin heavy constant mu OS=Homo sapiens OX=9606 GN=IGHM PE=1 SV=4	10127	20210911_zy_urine_ethcd_1.1238.1238.3	controllerType=0 controllerNumber=1 scan=1238	5.7603
01337:2	2	R.NEEYN[+2350.830]K.S	HexNAc(4)Hex(5)Fuc(1)NeuAc(2)	N[+2351]	1574.09	2	3147.17	3147.18	0	-1.6	52	Specific	300.39	124.03	124.03	4.89	53	>sp|P02763|A1AG1_HUMAN Alpha-1-acid glycoprotein 1 OS=Homo sapiens OX=9606 GN=ORM1 PE=1 SV=1	2208	20210911_zy_urine_ethcd_1.1475.1475.2	controllerType=0 controllerNumber=1 scan=1475	6.8558
02537:3	50	K.VTAC[+57.021]HSSQPN[+2204.772]ATLYK.M	HexNAc(4)Hex(5)NeuAc(2)	C[+57], N[+2205]	1294.53	3	3881.56	3881.58	0	-3.8	27	Specific	300.47	117.49	117.49	6.89	2	>sp|P05543|THBG_HUMAN Thyroxine-binding globulin OS=Homo sapiens OX=9606 GN=SERPINA7 PE=1 SV=2	13666	20210911_zy_urine_ethcd_1.2788.2788.3	controllerType=0 controllerNumber=1 scan=2788	12.4402
08309:3	2	R.QDQC[+57.021]IYN[+2643.941]TTYLNVQR.E	HexNAc(6)Hex(7)NeuAc(1)	C[+57], N[+2644]	1520.28	3	4558.82	4559.84	-1	-3.3	87	Specific	300.6	168.46	168.46	6.64	53	>sp|P02763|A1AG1_HUMAN Alpha-1-acid glycoprotein 1 OS=Homo sapiens OX=9606 GN=ORM1 PE=1 SV=1	2208	20210911_zy_urine_ethcd_1.9120.9120.3	controllerType=0 controllerNumber=1 scan=9120	40.8101
02837:3	10	R.EEQFN[+2059.735]STFR.V	HexNAc(4)Hex(5)Fuc(1)NeuAc(1)	N[+2060]	1073.09	3	3217.25	3217.26	0	-3.4	172	Specific	300.65	131.58	131.58	5.76	27	>sp|P01859|IGHG2_HUMAN Immunoglobulin heavy constant gamma 2 OS=Homo sapiens OX=9606 GN=IGHG2 PE=1 SV=2	2858	20210911_zy_urine_ethcd_1.3117.3117.3	controllerType=0 controllerNumber=1 scan=3117	13.9031
02977:3	44	R.RN[+2059.735]FTAADWGQSR.D	HexNAc(4)Hex(5)Fuc(1)NeuAc(1)	N[+2060]	1156.8	3	3468.39	3468.41	0	-5.4	211	Specific	301.31	123.38	123.38	5.54	5	>sp|P12109|CO6A1_HUMAN Collagen alpha-1(VI) chain OS=Homo sapiens OX=9606 GN=COL6A1 PE=1 SV=3	962	20210911_zy_urine_ethcd_1.3270.3270.3	controllerType=0 controllerNumber=1 scan=3270	14.587
11395:4	8	K.DIVEYYNDSN[+3007.058]GSHVLQGR.F	HexNAc(5)Hex(6)Fuc(1)NeuAc(3)	N[+3007]	1269.25	4	5074	5073.02	1	-4.6	103	Specific	302.17	203.12	6.68	6.13	33	>sp|P25311|ZA2G_HUMAN Zinc-alpha-2-glycoprotein OS=Homo sapiens OX=9606 GN=AZGP1 PE=1 SV=2	18783	20210911_zy_urine_ethcd_1.12501.12501.4	controllerType=0 controllerNumber=1 scan=12501	55.8958
01112:3	4	R.EN[+2715.963]GTVSR.Y	HexNAc(5)Hex(6)Fuc(1)NeuAc(2)	N[+2716]	1160.11	3	3478.33	3478.34	0	-1.9	102	Specific	302.19	102.83	102.83	5.51	34	>sp|P19652|A1AG2_HUMAN Alpha-1-acid glycoprotein 2 OS=Homo sapiens OX=9606 GN=ORM2 PE=1 SV=2	4531	20210911_zy_urine_ethcd_1.1228.1228.3	controllerType=0 controllerNumber=1 scan=1228	5.7132
07385:3	73	R.GTAGNALMDGASQLM[+15.995]GEN[+1913.677]R.T	HexNAc(4)Hex(5)NeuAc(1)	M[+16], N[+1914]	1274.85	3	3822.53	3822.53	0	0.2	377	Specific	302.35	169.53	140.79	3.97	2	>sp|P02675|FIBB_HUMAN Fibrinogen beta chain OS=Homo sapiens OX=9606 GN=FGB PE=1 SV=2	6006	20210911_zy_urine_ethcd_1.8109.8109.3	controllerType=0 controllerNumber=1 scan=8109	36.3101
01464:3	41	K.KLN[+1809.666]YTLSQGHR.V	HexNAc(5)Hex(4)Fuc(1)	N[+1810]	1042.79	3	3126.37	3126.37	0	-1.1	126	Specific	302.94	118.49	118.49	4.98	8	>sp|P15144|AMPN_HUMAN Aminopeptidase N OS=Homo sapiens OX=9606 GN=ANPEP PE=1 SV=4	1209	20210911_zy_urine_ethcd_1.1615.1615.3	controllerType=0 controllerNumber=1 scan=1615	7.4896
00840:3	18	R.HN[+2100.761]STGC[+57.021]LR.M	HexNAc(5)Hex(4)Fuc(1)NeuAc(1)	C[+57], N[+2101]	1015.73	3	3045.19	3045.2	0	-4	290	Specific	303.55	80.48	80.48	5.36	18	>sp|P10909|CLUS_HUMAN Clusterin OS=Homo sapiens OX=9606 GN=CLU PE=1 SV=1	6125	20210911_zy_urine_ethcd_1.930.930.3	controllerType=0 controllerNumber=1 scan=930	4.3747
03045:3	67	K.DN[+2204.772]NSIITR.K	HexNAc(4)Hex(5)NeuAc(2)	N[+2205]	1046.42	3	3137.25	3137.25	0	-1.9	368	Specific	303.83	79.99	79.99	4.06	12	>sp|P06276|CHLE_HUMAN Cholinesterase OS=Homo sapiens OX=9606 GN=BCHE PE=1 SV=1	6937	20210911_zy_urine_ethcd_1.3345.3345.3	controllerType=0 controllerNumber=1 scan=3345	14.883
09805:3	9	K.C[+57.021]GLVPVLAENYN[+2059.735]K.S	HexNAc(4)Hex(5)Fuc(1)NeuAc(1)	C[+57], N[+2060]	1179.5	3	3536.48	3536.49	0	-1.8	421	Specific	304.6	170.86	170.86	6.07	20	>sp|P02787|TRFE_HUMAN Serotransferrin OS=Homo sapiens OX=9606 GN=TF PE=1 SV=3	18223	20210911_zy_urine_ethcd_1.10760.10760.3	controllerType=0 controllerNumber=1 scan=10760	48.1619
04990:4	74	R.GPGTLGWC[+57.021]VHN[+1864.634]ESC[+57.021]LPRPEQAR.C	HexNAc(2)Hex(9)	C[+57]*2, N[+1865]	1097.46	4	4386.82	4385.82	1	0.2	627	Specific	304.69	269.78	269.78	5.08	5	>sp|Q7Z7M0|MEGF8_HUMAN Multiple epidermal growth factor-like domains protein 8 OS=Homo sapiens OX=9606 GN=MEGF8 PE=1 SV=2	10623	20210911_zy_urine_ethcd_1.5482.5482.4	controllerType=0 controllerNumber=1 scan=5482	24.5766
14339:3	1	R.FALLM[+15.995]TNC[+57.021]YATPSSN[+2350.830]ATDPLK.Y	HexNAc(4)Hex(5)Fuc(1)NeuAc(2)	C[+57], M[+16], N[+2351]	1561.31	3	4681.92	4681.93	0	-2.2	499	Specific	304.74	205.51	56.17	7.35	49	>sp|P07911|UROM_HUMAN Uromodulin OS=Homo sapiens OX=9606 GN=UMOD PE=1 SV=1	16609	20210911_zy_urine_ethcd_1.15721.15721.3	controllerType=0 controllerNumber=1 scan=15721	70.1243
07518:3	7	R.C[+57.021]IQAN[+2569.905]YSLMENGK.I	HexNAc(5)Hex(6)NeuAc(2)	C[+57], N[+2570]	1366.54	3	4097.6	4097.6	0	0.3	61	Specific	304.74	129.34	129.34	5.15	25	>sp|P05090|APOD_HUMAN Apolipoprotein D OS=Homo sapiens OX=9606 GN=APOD PE=1 SV=1	120	20210911_zy_urine_ethcd_1.8255.8255.3	controllerType=0 controllerNumber=1 scan=8255	36.9567
13281:4	17	R.LAGKPTHVN[+2553.910]VSVVMAEVDGTC[+57.021].Y	HexNAc(5)Hex(5)Fuc(1)NeuAc(2)	C[+57], N[+2554]	1185.25	4	4737.98	4737.99	0	-2.2	332	CRagged	305.47	154.31	154.31	7.27	16	>sp|P01876|IGHA1_HUMAN Immunoglobulin heavy constant alpha 1 OS=Homo sapiens OX=9606 GN=IGHA1 PE=1 SV=2	9091	20210911_zy_urine_ethcd_1.14566.14566.4	controllerType=0 controllerNumber=1 scan=14566	65.0775
12460:3	4	R.QNQC[+57.021]FYN[+2569.905]SSYLNVQR.E	HexNAc(5)Hex(6)NeuAc(2)	C[+57], N[+2570]	1497.59	3	4490.76	4490.77	0	-1.8	87	Specific	305.52	168.48	168.48	6.86	34	>sp|P19652|A1AG2_HUMAN Alpha-1-acid glycoprotein 2 OS=Homo sapiens OX=9606 GN=ORM2 PE=1 SV=2	4531	20210911_zy_urine_ethcd_1.13667.13667.3	controllerType=0 controllerNumber=1 scan=13667	61.1168
04554:3	25	K.AN[+1809.666]LSQVADHLDHIK.E	HexNAc(5)Hex(4)Fuc(1)	N[+1810]	1124.16	3	3370.47	3370.48	0	-1.9	278	Specific	305.93	153.44	153.44	6.08	10	>sp|P16444|DPEP1_HUMAN Dipeptidase 1 OS=Homo sapiens OX=9606 GN=DPEP1 PE=1 SV=3	2717	20210911_zy_urine_ethcd_1.5003.5003.3	controllerType=0 controllerNumber=1 scan=5003	22.4055
14043:3	3	K.AGLQAFFQVQEC[+57.021]N[+2204.772]K.S	HexNAc(4)Hex(5)NeuAc(2)	C[+57], N[+2205]	1282.19	3	3844.56	3844.56	0	0.1	346	Specific	306.43	198.55	198.55	5.36	26	>sp|P00450|CERU_HUMAN Ceruloplasmin OS=Homo sapiens OX=9606 GN=CP PE=1 SV=1	460	20210911_zy_urine_ethcd_1.15398.15398.3	controllerType=0 controllerNumber=1 scan=15398	68.7194
04267:3	6	K.TPLTAN[+2059.735]ITK.S	HexNAc(4)Hex(5)Fuc(1)NeuAc(1)	N[+2060]	1006.76	3	3018.27	3018.29	0	-5.9	200	Specific	306.99	126.9	126.9	5.74	32	>sp|P01877|IGHA2_HUMAN Immunoglobulin heavy constant alpha 2 OS=Homo sapiens OX=9606 GN=IGHA2 PE=1 SV=4	10403	20210911_zy_urine_ethcd_1.4688.4688.4	controllerType=0 controllerNumber=1 scan=4688	20.984
05001:3	3	K.ELHHLQEQN[+1913.677]VSNAFLDK.G	HexNAc(4)Hex(5)NeuAc(1)	N[+1914]	1312.56	3	3935.67	3935.68	0	-1.5	754	Specific	308.3	160.5	160.5	6.22	26	>sp|P00450|CERU_HUMAN Ceruloplasmin OS=Homo sapiens OX=9606 GN=CP PE=1 SV=1	460	20210911_zy_urine_ethcd_1.5494.5494.3	controllerType=0 controllerNumber=1 scan=5494	24.6294
01446:3	14	K.TKPREEQFN[+1444.534]STYR.V	HexNAc(4)Hex(3)Fuc(1)	N[+1445]	1034.12	3	3100.34	3100.35	0	-2.9	169	Specific	309.21	95.87	95.87	5.29	17	>sp|P01861|IGHG4_HUMAN Immunoglobulin heavy constant gamma 4 OS=Homo sapiens OX=9606 GN=IGHG4 PE=1 SV=1	12793	20210911_zy_urine_ethcd_1.1595.1595.3	controllerType=0 controllerNumber=1 scan=1595	7.3985
03065:3	8	R.FGC[+57.021]EIENN[+2204.772]R.S	HexNAc(4)Hex(5)NeuAc(2)	C[+57], N[+2205]	1115.09	3	3343.26	3343.27	0	-0.7	121	Specific	309.29	149.91	149.91	5.73	33	>sp|P25311|ZA2G_HUMAN Zinc-alpha-2-glycoprotein OS=Homo sapiens OX=9606 GN=AZGP1 PE=1 SV=2	18783	20210911_zy_urine_ethcd_1.3367.3367.3	controllerType=0 controllerNumber=1 scan=3367	14.9837
04828:4	5	K.NC[+57.021]HHSGSQVPLIHC[+57.021]NLTTPSPQN[+568.212]ISNC[+57.021]R.Y	HexNAc(2)Hex(1)	C[+57]*3, N[+568]	949.927	4	3796.69	3796.7	0	-2.5	97	Specific	310.09	293.08	10.6	7.22	16	>sp|P10153|RNAS2_HUMAN Non-secretory ribonuclease OS=Homo sapiens OX=9606 GN=RNASE2 PE=1 SV=2	14694	20210911_zy_urine_ethcd_1.5304.5304.4	controllerType=0 controllerNumber=1 scan=5304	23.7742
02463:2	10	R.EEQFN[+1241.454]STFR.V	HexNAc(3)Hex(3)Fuc(1)	N[+1241]	1199.99	2	2398.97	2398.98	0	-1.6	172	Specific	310.42	90.07	90.07	5.68	27	>sp|P01859|IGHG2_HUMAN Immunoglobulin heavy constant gamma 2 OS=Homo sapiens OX=9606 GN=IGHG2 PE=1 SV=2	2858	20210911_zy_urine_ethcd_1.2706.2706.3	controllerType=0 controllerNumber=1 scan=2706	12.0932
03473:3	37	R.GHTLTLN[+1622.582]FTR.N	HexNAc(4)Hex(5)	N[+1623]	928.071	3	2782.2	2782.2	0	-2.1	97	Specific	310.44	137.98	137.98	5.19	13	>sp|P11279|LAMP1_HUMAN Lysosome-associated membrane glycoprotein 1 OS=Homo sapiens OX=9606 GN=LAMP1 PE=1 SV=3	4405	20210911_zy_urine_ethcd_1.3816.3816.3	controllerType=0 controllerNumber=1 scan=3816	17.0378
01663:3	18	K.KKEDALN[+2861.000]ETR.E	HexNAc(5)Hex(6)NeuAc(3)	N[+2861]	1355.54	3	4064.62	4064.63	0	-3.8	80	Specific	311.2	138.28	138.28	4.86	18	>sp|P10909|CLUS_HUMAN Clusterin OS=Homo sapiens OX=9606 GN=CLU PE=1 SV=1	6125	20210911_zy_urine_ethcd_1.1832.1832.3	controllerType=0 controllerNumber=1 scan=1832	8.4101
10746:3	18	R.LAN[+2391.857]LTQGEDQYYLR.V	HexNAc(5)Hex(4)Fuc(1)NeuAc(2)	N[+2392]	1359.23	3	4075.68	4075.69	0	-2.7	372	Specific	311.34	174.16	174.16	5.94	18	>sp|P10909|CLUS_HUMAN Clusterin OS=Homo sapiens OX=9606 GN=CLU PE=1 SV=1	6125	20210911_zy_urine_ethcd_1.11790.11790.3	controllerType=0 controllerNumber=1 scan=11790	52.7191
01092:3	22	R.EGN[+1971.719]ATGHLVGR.Y	HexNAc(5)Hex(5)Fuc(1)	N[+1972]	1028.1	3	3082.28	3082.28	0	-2.5	1800	Specific	311.38	132.11	132.11	5.04	16	>sp|O60494|CUBN_HUMAN Cubilin OS=Homo sapiens OX=9606 GN=CUBN PE=1 SV=5	6499	20210911_zy_urine_ethcd_1.1206.1206.3	controllerType=0 controllerNumber=1 scan=1206	5.6098
02390:3	47	K.MFSQN[+2350.830]DTR.C	HexNAc(4)Hex(5)Fuc(1)NeuAc(2)	N[+2351]	1117.09	3	3349.26	3349.27	0	-1.6	321	Specific	311.51	123.46	123.46	5.28	5	>sp|P02750|A2GL_HUMAN Leucine-rich alpha-2-glycoprotein OS=Homo sapiens OX=9606 GN=LRG1 PE=1 SV=2	1095	20210911_zy_urine_ethcd_1.2625.2625.3	controllerType=0 controllerNumber=1 scan=2625	11.7556
09971:3	7	R.ADGTVNQIEGEATPVN[+1913.677]LTEPAK.L	HexNAc(4)Hex(5)NeuAc(1)	N[+1914]	1389.93	3	4167.79	4167.8	0	-2.3	83	Specific	311.57	200.76	200.76	7.19	25	>sp|P05090|APOD_HUMAN Apolipoprotein D OS=Homo sapiens OX=9606 GN=APOD PE=1 SV=1	120	20210911_zy_urine_ethcd_1.10942.10942.3	controllerType=0 controllerNumber=1 scan=10942	48.971
14220:3	9	K.C[+57.021]GLVPVLAENYN[+2861.000]K.S	HexNAc(5)Hex(6)NeuAc(3)	C[+57], N[+2861]	1446.58	3	4337.74	4337.75	0	-3.5	421	Specific	311.63	193.16	193.16	5.77	20	>sp|P02787|TRFE_HUMAN Serotransferrin OS=Homo sapiens OX=9606 GN=TF PE=1 SV=3	18223	20210911_zy_urine_ethcd_1.15592.15592.3	controllerType=0 controllerNumber=1 scan=15592	69.5576
01051:3	18	R.HN[+2204.772]STGC[+57.021]LR.M	HexNAc(4)Hex(5)NeuAc(2)	C[+57], N[+2205]	1050.41	3	3149.2	3149.21	0	-2.6	290	Specific	311.85	88.62	88.62	5.47	18	>sp|P10909|CLUS_HUMAN Clusterin OS=Homo sapiens OX=9606 GN=CLU PE=1 SV=1	6125	20210911_zy_urine_ethcd_1.1161.1161.3	controllerType=0 controllerNumber=1 scan=1161	5.4044
10544:3	8	K.DIVEYYN[+2861.000]DSNGSHVLQGR.F	HexNAc(5)Hex(6)NeuAc(3)	N[+2861]	1642.99	3	4926.95	4926.96	0	-1	103	Specific	312.25	162.81	13.81	6.47	33	>sp|P25311|ZA2G_HUMAN Zinc-alpha-2-glycoprotein OS=Homo sapiens OX=9606 GN=AZGP1 PE=1 SV=2	18783	20210911_zy_urine_ethcd_1.11569.11569.3	controllerType=0 controllerNumber=1 scan=11569	51.7381
04850:3	88	K.ALVAVVAGN[+2059.735]STTPR.R	HexNAc(4)Hex(5)Fuc(1)NeuAc(1)	N[+2060]	1139.17	3	3415.49	3415.5	0	-4.1	97	Specific	312.38	172.22	172.22	4.59	1	>sp|Q9Y6Q6|TNR11_HUMAN Tumor necrosis factor receptor superfamily member 11A OS=Homo sapiens OX=9606 GN=TNFRSF11A PE=1 SV=1	15263	20210911_zy_urine_ethcd_1.5328.5328.3	controllerType=0 controllerNumber=1 scan=5328	23.8834
07219:3	52	R.FN[+1913.677]SSYLQGTNQITGR.Y	HexNAc(4)Hex(5)NeuAc(1)	N[+1914]	1200.5	3	3599.49	3599.5	0	-2.8	1522	Specific	312.4	147.47	147.47	6.74	2	>sp|P04114|APOB_HUMAN Apolipoprotein B-100 OS=Homo sapiens OX=9606 GN=APOB PE=1 SV=2	6234	20210911_zy_urine_ethcd_1.7927.7927.3	controllerType=0 controllerNumber=1 scan=7927	35.494
10243:4	2	R.QDQC[+57.021]IYN[+3226.132]TTYLNVQR.E	HexNAc(6)Hex(7)NeuAc(3)	C[+57], N[+3226]	1286.51	4	5143.04	5142.03	1	0.6	87	Specific	312.43	199.28	199.28	6.27	53	>sp|P02763|A1AG1_HUMAN Alpha-1-acid glycoprotein 1 OS=Homo sapiens OX=9606 GN=ORM1 PE=1 SV=1	2208	20210911_zy_urine_ethcd_1.11239.11239.4	controllerType=0 controllerNumber=1 scan=11239	50.285
08072:4	3	K.ELHHLQEQN[+3007.058]VSNAFLDK.G	HexNAc(5)Hex(6)Fuc(1)NeuAc(3)	N[+3007]	1258.02	4	5029.05	5029.06	0	-2	754	Specific	312.88	233.13	233.13	6.57	26	>sp|P00450|CERU_HUMAN Ceruloplasmin OS=Homo sapiens OX=9606 GN=CP PE=1 SV=1	460	20210911_zy_urine_ethcd_1.8861.8861.4	controllerType=0 controllerNumber=1 scan=8861	39.6648
01618:3	11	R.GHVN[+2204.772]ITR.S	HexNAc(4)Hex(5)NeuAc(2)	N[+2205]	1001.07	3	3001.21	3001.21	0	-2.4	118	Specific	312.89	118.07	118.07	4.96	13	>sp|P00734|THRB_HUMAN Prothrombin OS=Homo sapiens OX=9606 GN=F2 PE=1 SV=2	18404	20210911_zy_urine_ethcd_1.1783.1783.3	controllerType=0 controllerNumber=1 scan=1783	8.1974
09282:3	17	R.LAGKPTHVN[+2350.830]VSVVM[+15.995]AEVDGTC[+57.021].Y	HexNAc(4)Hex(5)Fuc(1)NeuAc(2)	C[+57], M[+16], N[+2351]	1517.64	3	4550.9	4550.9	0	-1.3	332	CRagged	313	217.1	217.1	6.93	16	>sp|P01876|IGHA1_HUMAN Immunoglobulin heavy constant alpha 1 OS=Homo sapiens OX=9606 GN=IGHA1 PE=1 SV=2	9091	20210911_zy_urine_ethcd_1.10187.10187.3	controllerType=0 controllerNumber=1 scan=10187	45.5812
12561:4	2	R.QDQC[+57.021]IYN[+3372.190]TTYLNVQR.E	HexNAc(6)Hex(7)Fuc(1)NeuAc(3)	C[+57], N[+3372]	1322.78	4	5288.09	5288.09	0	-0.1	87	Specific	313.61	180.2	180.2	6.37	53	>sp|P02763|A1AG1_HUMAN Alpha-1-acid glycoprotein 1 OS=Homo sapiens OX=9606 GN=ORM1 PE=1 SV=1	2208	20210911_zy_urine_ethcd_1.13778.13778.4	controllerType=0 controllerNumber=1 scan=13778	61.6056
02830:3	39	R.DIENFN[+1913.677]STQK.F	HexNAc(4)Hex(5)NeuAc(1)	N[+1914]	1037.08	3	3109.23	3109.24	0	-1.9	28	Specific	313.84	133.89	133.89	5.55	7	>sp|P43652|AFAM_HUMAN Afamin OS=Homo sapiens OX=9606 GN=AFM PE=1 SV=1	20367	20210911_zy_urine_ethcd_1.3109.3109.3	controllerType=0 controllerNumber=1 scan=3109	13.8674
10702:3	16	K.TAVN[+2715.963]C[+57.021]SSDFDAC[+57.021]LITK.A	HexNAc(5)Hex(6)Fuc(1)NeuAc(2)	C[+57]*2, N[+2716]	1506.6	3	4517.77	4517.77	0	-0.3	40	Specific	314.34	204.76	204.76	5.71	11	>sp|P13987|CD59_HUMAN CD59 glycoprotein OS=Homo sapiens OX=9606 GN=CD59 PE=1 SV=1	1116	20210911_zy_urine_ethcd_1.11742.11742.3	controllerType=0 controllerNumber=1 scan=11742	52.5038
04878:3	25	R.AN[+2772.984]LTTLAGTHTNIPK.L	HexNAc(6)Hex(6)NeuAc(2)	N[+2773]	1442.29	3	4324.84	4324.83	0	2.7	56	Specific	314.52	108.05	108.05	5.86	10	>sp|P16444|DPEP1_HUMAN Dipeptidase 1 OS=Homo sapiens OX=9606 GN=DPEP1 PE=1 SV=3	2717	20210911_zy_urine_ethcd_1.5359.5359.3	controllerType=0 controllerNumber=1 scan=5359	24.0216
03106:3	14	R.EEQFN[+2350.830]STYR.V	HexNAc(4)Hex(5)Fuc(1)NeuAc(2)	N[+2351]	1175.45	3	3524.34	3524.35	0	-1.5	173	Specific	314.77	91.75	91.75	6.02	17	>sp|P01861|IGHG4_HUMAN Immunoglobulin heavy constant gamma 4 OS=Homo sapiens OX=9606 GN=IGHG4 PE=1 SV=1	12793	20210911_zy_urine_ethcd_1.3412.3412.3	controllerType=0 controllerNumber=1 scan=3412	15.1951
13438:3	3	K.EN[+2221.788]LTAPGSDSAVFFEQGTTR.I	HexNAc(4)Hex(6)Fuc(1)NeuAc(1)	N[+2222]	1450.27	3	4348.79	4348.79	0	0.8	396	Specific	314.8	194.1	194.1	5.42	26	>sp|P00450|CERU_HUMAN Ceruloplasmin OS=Homo sapiens OX=9606 GN=CP PE=1 SV=1	460	20210911_zy_urine_ethcd_1.14737.14737.3	controllerType=0 controllerNumber=1 scan=14737	65.8274
09316:4	17	R.LAGKPTHVN[+2553.910]VSVVM[+15.995]AEVDGTC[+57.021].Y	HexNAc(5)Hex(5)Fuc(1)NeuAc(2)	C[+57], M[+16], N[+2554]	1189.25	4	4753.97	4753.98	0	-2.2	332	CRagged	315.6	137.98	76.34	6.99	16	>sp|P01876|IGHA1_HUMAN Immunoglobulin heavy constant alpha 1 OS=Homo sapiens OX=9606 GN=IGHA1 PE=1 SV=2	9091	20210911_zy_urine_ethcd_1.10224.10224.4	controllerType=0 controllerNumber=1 scan=10224	45.7429
02036:3	2	R.EN[+3226.132]GTISR.Y	HexNAc(6)Hex(7)NeuAc(3)	N[+3226]	1334.84	3	4002.51	4002.52	0	-2	102	Specific	315.64	32.16	32.16	4.66	53	>sp|P02763|A1AG1_HUMAN Alpha-1-acid glycoprotein 1 OS=Homo sapiens OX=9606 GN=ORM1 PE=1 SV=1	2208	20210911_zy_urine_ethcd_1.2239.2239.3	controllerType=0 controllerNumber=1 scan=2239	10.1062
00845:3	18	R.HN[+2141.788]STGC[+57.021]LR.M	HexNAc(6)Hex(3)Fuc(1)NeuAc(1)	C[+57], N[+2142]	1029.41	3	3086.22	3086.22	0	-3.1	290	Specific	316	107.11	107.11	5.22	18	>sp|P10909|CLUS_HUMAN Clusterin OS=Homo sapiens OX=9606 GN=CLU PE=1 SV=1	6125	20210911_zy_urine_ethcd_1.935.935.3	controllerType=0 controllerNumber=1 scan=935	4.3967
01892:3	14	R.EEQFN[+1606.587]STYR.V	HexNAc(4)Hex(4)Fuc(1)	N[+1607]	927.37	3	2780.1	2780.1	0	-2.5	173	Specific	316.2	118.37	118.37	6.05	17	>sp|P01861|IGHG4_HUMAN Immunoglobulin heavy constant gamma 4 OS=Homo sapiens OX=9606 GN=IGHG4 PE=1 SV=1	12793	20210911_zy_urine_ethcd_1.2082.2082.3	controllerType=0 controllerNumber=1 scan=2082	9.4714
08068:3	12	R.ITYSIVQTN[+2861.000]C[+57.021]SK.E	HexNAc(5)Hex(6)NeuAc(3)	C[+57], N[+2861]	1425.57	3	4274.7	4274.7	0	-1	197	Specific	316.93	145.61	145.61	5.45	26	>sp|P01042|KNG1_HUMAN Kininogen-1 OS=Homo sapiens OX=9606 GN=KNG1 PE=1 SV=2	6533	20210911_zy_urine_ethcd_1.8857.8857.3	controllerType=0 controllerNumber=1 scan=8857	39.6466
13915:3	3	K.AGLQAFFQVQEC[+57.021]N[+2350.830]K.S	HexNAc(4)Hex(5)Fuc(1)NeuAc(2)	C[+57], N[+2351]	1330.87	3	3990.6	3990.62	0	-3.9	346	Specific	317.03	203.29	66.21	6.04	26	>sp|P00450|CERU_HUMAN Ceruloplasmin OS=Homo sapiens OX=9606 GN=CP PE=1 SV=1	460	20210911_zy_urine_ethcd_1.15259.15259.3	controllerType=0 controllerNumber=1 scan=15259	68.1135
10692:3	2	R.QDQC[+57.021]IYN[+2569.905]TTYLNVQR.E	HexNAc(5)Hex(6)NeuAc(2)	C[+57], N[+2570]	1495.93	3	4485.79	4485.8	0	-3.1	87	Specific	317.5	199.09	199.09	6.55	53	>sp|P02763|A1AG1_HUMAN Alpha-1-acid glycoprotein 1 OS=Homo sapiens OX=9606 GN=ORM1 PE=1 SV=1	2208	20210911_zy_urine_ethcd_1.11731.11731.3	controllerType=0 controllerNumber=1 scan=11731	52.4548
09295:3	22	R.C[+57.021]GSN[+1540.529]FTGPSGYIISPNYPK.Q	HexNAc(2)Hex(7)	C[+57], N[+1541]	1200.5	3	3599.49	3599.49	0	2	2920	Specific	317.6	217.91	217.91	5.32	16	>sp|O60494|CUBN_HUMAN Cubilin OS=Homo sapiens OX=9606 GN=CUBN PE=1 SV=5	6499	20210911_zy_urine_ethcd_1.10201.10201.3	controllerType=0 controllerNumber=1 scan=10201	45.6423
05227:3	3	K.EHEGAIYPDN[+2715.963]TTDFQR.A	HexNAc(5)Hex(6)Fuc(1)NeuAc(2)	N[+2716]	1536.6	3	4607.79	4608.8	-1	-2.5	129	Specific	317.64	152.37	152.37	6.52	26	>sp|P00450|CERU_HUMAN Ceruloplasmin OS=Homo sapiens OX=9606 GN=CP PE=1 SV=1	460	20210911_zy_urine_ethcd_1.5742.5742.3	controllerType=0 controllerNumber=1 scan=5742	25.7431
07468:3	31	K.NYHQPAILN[+2553.910]SSALR.Q	HexNAc(5)Hex(5)Fuc(1)NeuAc(2)	N[+2554]	1379.91	3	4137.73	4137.74	0	-2	41	Specific	317.98	142.65	142.65	6.17	5	>sp|Q16769|QPCT_HUMAN Glutaminyl-peptide cyclotransferase OS=Homo sapiens OX=9606 GN=QPCT PE=1 SV=1	12985	20210911_zy_urine_ethcd_1.8200.8200.3	controllerType=0 controllerNumber=1 scan=8200	36.715
07303:3	12	K.LNAENN[+2141.788]ATFYFK.I	HexNAc(6)Hex(3)Fuc(1)NeuAc(1)	N[+2142]	1191.83	3	3573.47	3573.48	0	-2.4	289	Specific	317.99	185.79	185.79	5.77	26	>sp|P01042|KNG1_HUMAN Kininogen-1 OS=Homo sapiens OX=9606 GN=KNG1 PE=1 SV=2	6533	20210911_zy_urine_ethcd_1.8019.8019.3	controllerType=0 controllerNumber=1 scan=8019	35.9064
13434:3	1	R.FALLM[+15.995]TNC[+57.021]YATPSSN[+2100.761]ATDPLK.Y	HexNAc(5)Hex(4)Fuc(1)NeuAc(1)	C[+57], M[+16], N[+2101]	1477.95	3	4431.84	4431.86	0	-3.9	499	Specific	318.12	232.44	188.73	7.23	49	>sp|P07911|UROM_HUMAN Uromodulin OS=Homo sapiens OX=9606 GN=UMOD PE=1 SV=1	16609	20210911_zy_urine_ethcd_1.14733.14733.3	controllerType=0 controllerNumber=1 scan=14733	65.8084
14126:3	9	R.QQQHLFGSN[+2350.830]VTDC[+57.021]SGNFC[+57.021]LFR.S	HexNAc(4)Hex(5)Fuc(1)NeuAc(2)	C[+57]*2, N[+2351]	1622.32	3	4864.95	4865.95	-1	-0.6	622	Specific	318.18	206.53	206.53	7.2	20	>sp|P02787|TRFE_HUMAN Serotransferrin OS=Homo sapiens OX=9606 GN=TF PE=1 SV=3	18223	20210911_zy_urine_ethcd_1.15489.15489.3	controllerType=0 controllerNumber=1 scan=15489	69.1123
03592:3	25	R.AN[+1971.719]LTTLAGTHTNIPK.L	HexNAc(5)Hex(5)Fuc(1)	N[+1972]	1175.19	3	3523.56	3523.57	0	-2.7	56	Specific	318.3	199.11	199.11	6.37	10	>sp|P16444|DPEP1_HUMAN Dipeptidase 1 OS=Homo sapiens OX=9606 GN=DPEP1 PE=1 SV=3	2717	20210911_zy_urine_ethcd_1.3947.3947.3	controllerType=0 controllerNumber=1 scan=3947	17.6297
08322:3	2	R.QDQC[+57.021]IYN[+2643.941]TTYLNVQR.E	HexNAc(6)Hex(7)NeuAc(1)	C[+57], N[+2644]	1520.62	3	4559.84	4559.84	0	-0.7	87	Specific	319.15	194.48	194.48	6.53	53	>sp|P02763|A1AG1_HUMAN Alpha-1-acid glycoprotein 1 OS=Homo sapiens OX=9606 GN=ORM1 PE=1 SV=1	2208	20210911_zy_urine_ethcd_1.9135.9135.3	controllerType=0 controllerNumber=1 scan=9135	40.8747
13111:3	16	K.TAVN[+3007.058]C[+57.021]SSDFDAC[+57.021]LITK.A	HexNAc(5)Hex(6)Fuc(1)NeuAc(3)	C[+57]*2, N[+3007]	1603.63	3	4808.87	4808.87	0	-0.4	40	Specific	319.9	189.11	189.11	6.06	11	>sp|P13987|CD59_HUMAN CD59 glycoprotein OS=Homo sapiens OX=9606 GN=CD59 PE=1 SV=1	1116	20210911_zy_urine_ethcd_1.14380.14380.3	controllerType=0 controllerNumber=1 scan=14380	64.265
05934:3	12	R.ITYSIVQTN[+2919.042]C[+57.021]SK.E	HexNAc(6)Hex(6)Fuc(1)NeuAc(2)	C[+57], N[+2919]	1445.25	3	4333.73	4332.75	1	-3.5	197	Specific	320.07	151.78	79.3	5.51	26	>sp|P01042|KNG1_HUMAN Kininogen-1 OS=Homo sapiens OX=9606 GN=KNG1 PE=1 SV=2	6533	20210911_zy_urine_ethcd_1.6517.6517.3	controllerType=0 controllerNumber=1 scan=6517	29.2261
13821:4	4	R.QNQC[+57.021]FYN[+3663.286]SSYLNVQR.E	HexNAc(6)Hex(7)Fuc(1)NeuAc(4)	C[+57], N[+3663]	1396.79	4	5584.14	5584.15	0	-2	87	Specific	320.48	173.11	173.11	7.19	34	>sp|P19652|A1AG2_HUMAN Alpha-1-acid glycoprotein 2 OS=Homo sapiens OX=9606 GN=ORM2 PE=1 SV=2	4531	20210911_zy_urine_ethcd_1.15156.15156.4	controllerType=0 controllerNumber=1 scan=15156	67.6733
03196:3	49	K.ANQQLN[+2059.735]FTEAK.E	HexNAc(4)Hex(5)Fuc(1)NeuAc(1)	N[+2060]	1108.46	3	3323.36	3323.37	0	-1.6	48	Specific	320.51	178.05	178.05	5.38	4	>sp|Q9Y5Y7|LYVE1_HUMAN Lymphatic vessel endothelial hyaluronic acid receptor 1 OS=Homo sapiens OX=9606 GN=LYVE1 PE=1 SV=2	9455	20210911_zy_urine_ethcd_1.3511.3511.3	controllerType=0 controllerNumber=1 scan=3511	15.6475
12569:4	2	R.QDQC[+57.021]IYN[+3663.286]TTYLNVQR.E	HexNAc(6)Hex(7)Fuc(1)NeuAc(4)	C[+57], N[+3663]	1395.8	4	5580.18	5579.18	1	-0.4	87	Specific	320.78	187.26	187.26	6.48	53	>sp|P02763|A1AG1_HUMAN Alpha-1-acid glycoprotein 1 OS=Homo sapiens OX=9606 GN=ORM1 PE=1 SV=1	2208	20210911_zy_urine_ethcd_1.13787.13787.4	controllerType=0 controllerNumber=1 scan=13787	61.6428
12176:4	4	R.QNQC[+57.021]FYN[+3372.190]SSYLNVQR.E	HexNAc(6)Hex(7)Fuc(1)NeuAc(3)	C[+57], N[+3372]	1324.02	4	5293.05	5293.06	0	-1.1	87	Specific	321.07	193.88	193.88	7.08	34	>sp|P19652|A1AG2_HUMAN Alpha-1-acid glycoprotein 2 OS=Homo sapiens OX=9606 GN=ORM2 PE=1 SV=2	4531	20210911_zy_urine_ethcd_1.13357.13357.4	controllerType=0 controllerNumber=1 scan=13357	59.7517
02007:3	2	R.EN[+2861.000]GTISR.Y	HexNAc(5)Hex(6)NeuAc(3)	N[+2861]	1213.13	3	3637.38	3637.39	0	-2.3	102	Specific	321.32	31.59	31.59	4.7	53	>sp|P02763|A1AG1_HUMAN Alpha-1-acid glycoprotein 1 OS=Homo sapiens OX=9606 GN=ORM1 PE=1 SV=1	2208	20210911_zy_urine_ethcd_1.2207.2207.3	controllerType=0 controllerNumber=1 scan=2207	9.9791
10479:3	2	R.QDQC[+57.021]IYN[+2586.920]TTYLNVQR.E	HexNAc(5)Hex(7)Fuc(1)NeuAc(1)	C[+57], N[+2587]	1501.61	3	4502.82	4502.82	0	1.5	87	Specific	321.47	158.09	158.09	5.95	53	>sp|P02763|A1AG1_HUMAN Alpha-1-acid glycoprotein 1 OS=Homo sapiens OX=9606 GN=ORM1 PE=1 SV=1	2208	20210911_zy_urine_ethcd_1.11498.11498.3	controllerType=0 controllerNumber=1 scan=11498	51.4247
08152:4	3	K.ELHHLQEQN[+3007.058]VSNAFLDK.G	HexNAc(5)Hex(6)Fuc(1)NeuAc(3)	N[+3007]	1257.77	4	5028.05	5029.06	-1	-2	754	Specific	321.47	267.26	267.26	6.73	26	>sp|P00450|CERU_HUMAN Ceruloplasmin OS=Homo sapiens OX=9606 GN=CP PE=1 SV=1	460	20210911_zy_urine_ethcd_1.8949.8949.4	controllerType=0 controllerNumber=1 scan=8949	40.0532
10922:3	16	K.TAVN[+2350.830]C[+57.021]SSDFDAC[+57.021]LITK.A	HexNAc(4)Hex(5)Fuc(1)NeuAc(2)	C[+57]*2, N[+2351]	1384.88	3	4152.63	4152.64	0	-2.1	40	Specific	321.7	174.12	174.12	6.43	11	>sp|P13987|CD59_HUMAN CD59 glycoprotein OS=Homo sapiens OX=9606 GN=CD59 PE=1 SV=1	1116	20210911_zy_urine_ethcd_1.11983.11983.3	controllerType=0 controllerNumber=1 scan=11983	53.5747
03410:3	98	R.N[+2204.772]VSWATGR.S	HexNAc(4)Hex(5)NeuAc(2)	N[+2205]	1032.41	3	3095.21	3095.22	0	-2.3	151	Specific	321.76	150.25	150.25	3.42	1	>sp|P08571|CD14_HUMAN Monocyte differentiation antigen CD14 OS=Homo sapiens OX=9606 GN=CD14 PE=1 SV=2	4791	20210911_zy_urine_ethcd_1.3746.3746.3	controllerType=0 controllerNumber=1 scan=3746	16.7166
14182:4	2	R.QDQC[+57.021]IYN[+3663.286]TTYLNVQR.E	HexNAc(6)Hex(7)Fuc(1)NeuAc(4)	C[+57], N[+3663]	1395.55	4	5579.18	5579.18	0	-1.3	87	Specific	322.39	207.57	207.57	7.11	53	>sp|P02763|A1AG1_HUMAN Alpha-1-acid glycoprotein 1 OS=Homo sapiens OX=9606 GN=ORM1 PE=1 SV=1	2208	20210911_zy_urine_ethcd_1.15550.15550.4	controllerType=0 controllerNumber=1 scan=15550	69.3716
10620:3	8	K.DIVEYYNDSN[+2204.772]GSHVLQGR.F	HexNAc(4)Hex(5)NeuAc(2)	N[+2205]	1424.24	3	4270.71	4270.73	0	-3.6	103	Specific	322.74	160.2	2.32	6.8	33	>sp|P25311|ZA2G_HUMAN Zinc-alpha-2-glycoprotein OS=Homo sapiens OX=9606 GN=AZGP1 PE=1 SV=2	18783	20210911_zy_urine_ethcd_1.11652.11652.3	controllerType=0 controllerNumber=1 scan=11652	52.1048
02494:3	30	K.PSAGN[+2204.772]NSLYR.D	HexNAc(4)Hex(5)NeuAc(2)	N[+2205]	1095.1	3	3283.29	3283.3	0	-3.2	158	Specific	323.48	114.11	114.11	5.27	7	>sp|P02749|APOH_HUMAN Beta-2-glycoprotein 1 OS=Homo sapiens OX=9606 GN=APOH PE=1 SV=3	19971	20210911_zy_urine_ethcd_1.2741.2741.3	controllerType=0 controllerNumber=1 scan=2741	12.2317
08946:3	8	K.DIVEYYN[+2350.830]DSNGSHVLQGR.F	HexNAc(4)Hex(5)Fuc(1)NeuAc(2)	N[+2351]	1472.6	3	4415.77	4416.79	-1	-2.8	103	Specific	323.69	192.97	41.96	7.01	33	>sp|P25311|ZA2G_HUMAN Zinc-alpha-2-glycoprotein OS=Homo sapiens OX=9606 GN=AZGP1 PE=1 SV=2	18783	20210911_zy_urine_ethcd_1.9819.9819.3	controllerType=0 controllerNumber=1 scan=9819	43.9361
10576:3	1	R.C[+57.021]NTAAPMWLN[+2204.772]GTHPSSDEGIVSR.K	HexNAc(4)Hex(5)NeuAc(2)	C[+57], N[+2205]	1568.97	3	4704.9	4704.91	0	-2.5	223	Specific	324.2	168.17	168.17	7.49	49	>sp|P07911|UROM_HUMAN Uromodulin OS=Homo sapiens OX=9606 GN=UMOD PE=1 SV=1	16609	20210911_zy_urine_ethcd_1.11604.11604.3	controllerType=0 controllerNumber=1 scan=11604	51.8942
01705:2	93	R.VFLN[+1702.581]GSR.Q	HexNAc(2)Hex(8)	N[+1703]	1248.01	2	2495.01	2495.02	0	-1.2	101	Specific	324.44	166.13	166.13	3.56	4	>sp|P01133|EGF_HUMAN Pro-epidermal growth factor OS=Homo sapiens OX=9606 GN=EGF PE=1 SV=2	2598	20210911_zy_urine_ethcd_1.1878.1878.2	controllerType=0 controllerNumber=1 scan=1878	8.6018
12896:3	2	R.QDQC[+57.021]IYN[+3226.132]TTYLNVQR.E	HexNAc(6)Hex(7)NeuAc(3)	C[+57], N[+3226]	1714.68	3	5142.03	5142.03	0	-0.6	87	Specific	324.58	173.23	173.23	6.5	53	>sp|P02763|A1AG1_HUMAN Alpha-1-acid glycoprotein 1 OS=Homo sapiens OX=9606 GN=ORM1 PE=1 SV=1	2208	20210911_zy_urine_ethcd_1.14145.14145.3	controllerType=0 controllerNumber=1 scan=14145	63.2244
05854:3	12	R.ITYSIVQTN[+2756.989]C[+57.021]SK.E	HexNAc(6)Hex(5)Fuc(1)NeuAc(2)	C[+57], N[+2757]	1390.9	3	4170.68	4170.69	0	-3.2	197	Specific	324.93	180.59	180.59	5.49	26	>sp|P01042|KNG1_HUMAN Kininogen-1 OS=Homo sapiens OX=9606 GN=KNG1 PE=1 SV=2	6533	20210911_zy_urine_ethcd_1.6429.6429.3	controllerType=0 controllerNumber=1 scan=6429	28.8281
06791:3	56	R.LHNQLLPN[+2772.984]VTTVER.N	HexNAc(6)Hex(6)NeuAc(2)	N[+2773]	1469.97	3	4407.9	4406.89	1	3	504	Specific	325.3	139	139	5.07	5	>sp|P19440|GGT1_HUMAN Glutathione hydrolase 1 proenzyme OS=Homo sapiens OX=9606 GN=GGT1 PE=1 SV=2	20028	20210911_zy_urine_ethcd_1.7458.7458.3	controllerType=0 controllerNumber=1 scan=7458	33.4107
01791:3	10	K.TKPREEQFN[+1606.587]STFR.V	HexNAc(4)Hex(4)Fuc(1)	N[+1607]	1082.8	3	3246.4	3246.41	0	-2.1	168	Specific	325.44	196.23	196.23	5.32	27	>sp|P01859|IGHG2_HUMAN Immunoglobulin heavy constant gamma 2 OS=Homo sapiens OX=9606 GN=IGHG2 PE=1 SV=2	2858	20210911_zy_urine_ethcd_1.1972.1972.3	controllerType=0 controllerNumber=1 scan=1972	9.0112
04859:3	88	K.ALVAVVAGN[+2059.735]STTPR.R	HexNAc(4)Hex(5)Fuc(1)NeuAc(1)	N[+2060]	1139.17	3	3415.49	3415.5	0	-3.7	97	Specific	325.64	173.82	173.82	4.63	1	>sp|Q9Y6Q6|TNR11_HUMAN Tumor necrosis factor receptor superfamily member 11A OS=Homo sapiens OX=9606 GN=TNFRSF11A PE=1 SV=1	15263	20210911_zy_urine_ethcd_1.5338.5338.3	controllerType=0 controllerNumber=1 scan=5338	23.9295
10063:3	4	R.QNQC[+57.021]FYN[+2569.905]SSYLNVQR.E	HexNAc(5)Hex(6)NeuAc(2)	C[+57], N[+2570]	1497.59	3	4490.77	4490.77	0	-0.9	87	Specific	325.92	183.76	183.76	6.57	34	>sp|P19652|A1AG2_HUMAN Alpha-1-acid glycoprotein 2 OS=Homo sapiens OX=9606 GN=ORM2 PE=1 SV=2	4531	20210911_zy_urine_ethcd_1.11042.11042.3	controllerType=0 controllerNumber=1 scan=11042	49.4123
13843:4	1	R.C[+57.021]NTAAPM[+15.995]WLN[+3517.228]GTHPSSDEGIVSR.K	HexNAc(6)Hex(7)NeuAc(4)	C[+57], M[+16], N[+3517]	1509.35	4	6034.39	6033.36	1	4.4	223	Specific	326.05	213.47	213.47	6.34	49	>sp|P07911|UROM_HUMAN Uromodulin OS=Homo sapiens OX=9606 GN=UMOD PE=1 SV=1	16609	20210911_zy_urine_ethcd_1.15180.15180.4	controllerType=0 controllerNumber=1 scan=15180	67.7759
04051:3	8	R.FGC[+57.021]EIENN[+3007.058]R.S	HexNAc(5)Hex(6)Fuc(1)NeuAc(3)	C[+57], N[+3007]	1382.52	3	4145.55	4145.55	0	-1.7	121	Specific	326.07	152.45	152.45	5.98	33	>sp|P25311|ZA2G_HUMAN Zinc-alpha-2-glycoprotein OS=Homo sapiens OX=9606 GN=AZGP1 PE=1 SV=2	18783	20210911_zy_urine_ethcd_1.4451.4451.3	controllerType=0 controllerNumber=1 scan=4451	19.9115
07899:3	72	K.QDN[+1864.634]ETGIYYETWNVK.A	HexNAc(2)Hex(9)	N[+1865]	1242.16	3	3724.48	3724.48	0	-0.9	201	Specific	326.11	226.84	226.84	5.25	1	>sp|O75503|CLN5_HUMAN Ceroid-lipofuscinosis neuronal protein 5 OS=Homo sapiens OX=9606 GN=CLN5 PE=1 SV=2	814	20210911_zy_urine_ethcd_1.8672.8672.3	controllerType=0 controllerNumber=1 scan=8672	38.8285
15012:3	45	K.EFGFAWPESLN[+2350.830]C[+57.021]SK.F	HexNAc(4)Hex(5)Fuc(1)NeuAc(2)	C[+57], N[+2351]	1341.53	3	4022.57	4022.58	0	-1.7	134	Specific	326.16	216.46	216.46	6.21	5	>sp|Q9ULV1|FZD4_HUMAN Frizzled-4 OS=Homo sapiens OX=9606 GN=FZD4 PE=1 SV=2	20281	20210911_zy_urine_ethcd_1.16458.16458.3	controllerType=0 controllerNumber=1 scan=16458	73.3617
08572:3	1	R.C[+57.021]NTAAPMWLN[+2100.761]GTHPSSDEGIVSR.K	HexNAc(5)Hex(4)Fuc(1)NeuAc(1)	C[+57], N[+2101]	1534.3	3	4600.89	4600.9	0	-1.7	223	Specific	327	163.56	163.56	7.62	49	>sp|P07911|UROM_HUMAN Uromodulin OS=Homo sapiens OX=9606 GN=UMOD PE=1 SV=1	16609	20210911_zy_urine_ethcd_1.9408.9408.3	controllerType=0 controllerNumber=1 scan=9408	42.0722
08141:3	12	K.YNSQN[+2204.772]QSNNQFVLYR.I	HexNAc(4)Hex(5)NeuAc(2)	N[+2205]	1360.55	3	4079.65	4079.65	0	-1	44	Specific	327.03	137.38	137.38	6.53	26	>sp|P01042|KNG1_HUMAN Kininogen-1 OS=Homo sapiens OX=9606 GN=KNG1 PE=1 SV=2	6533	20210911_zy_urine_ethcd_1.8937.8937.3	controllerType=0 controllerNumber=1 scan=8937	39.9999
12102:3	7	R.ADGTVNQIEGEATPVN[+2204.772]LTEPAK.L	HexNAc(4)Hex(5)NeuAc(2)	N[+2205]	1486.96	3	4458.87	4458.89	0	-4	83	Specific	327.07	230.27	230.27	7.27	25	>sp|P05090|APOD_HUMAN Apolipoprotein D OS=Homo sapiens OX=9606 GN=APOD PE=1 SV=1	120	20210911_zy_urine_ethcd_1.13276.13276.3	controllerType=0 controllerNumber=1 scan=13276	59.3987
02243:3	8	R.FGC[+57.021]EIENN[+2262.814]R.S	HexNAc(5)Hex(5)Fuc(1)NeuAc(1)	C[+57], N[+2263]	1134.44	3	3401.3	3401.31	0	-1.3	121	Specific	327.26	118.36	118.36	6.04	33	>sp|P25311|ZA2G_HUMAN Zinc-alpha-2-glycoprotein OS=Homo sapiens OX=9606 GN=AZGP1 PE=1 SV=2	18783	20210911_zy_urine_ethcd_1.2465.2465.3	controllerType=0 controllerNumber=1 scan=2465	11.056
08588:3	45	R.ISMC[+57.021]QNLGYN[+2350.830]VTK.M	HexNAc(4)Hex(5)Fuc(1)NeuAc(2)	C[+57], N[+2351]	1293.52	3	3878.56	3878.56	0	-0.8	50	Specific	327.77	141.88	141.88	5.73	5	>sp|Q9ULV1|FZD4_HUMAN Frizzled-4 OS=Homo sapiens OX=9606 GN=FZD4 PE=1 SV=2	20281	20210911_zy_urine_ethcd_1.9426.9426.3	controllerType=0 controllerNumber=1 scan=9426	42.1497
12442:3	9	K.C[+57.021]GLVPVLAENYN[+2569.905]K.S	HexNAc(5)Hex(6)NeuAc(2)	C[+57], N[+2570]	1349.55	3	4046.65	4046.66	0	-2.1	421	Specific	328.08	178.95	178.95	6.11	20	>sp|P02787|TRFE_HUMAN Serotransferrin OS=Homo sapiens OX=9606 GN=TF PE=1 SV=3	18223	20210911_zy_urine_ethcd_1.13648.13648.3	controllerType=0 controllerNumber=1 scan=13648	61.0335
06436:3	36	K.TC[+57.021]DWLPKPN[+1694.603]MSASC[+57.021]K.E	HexNAc(3)Hex(4)Fuc(1)NeuAc(1)	C[+57]*2, N[+1695]	1163.8	3	3489.39	3489.4	0	-3.6	93	Specific	328.44	159.4	159.4	6.87	9	>sp|P07602|SAP_HUMAN Prosaposin OS=Homo sapiens OX=9606 GN=PSAP PE=1 SV=2	14314	20210911_zy_urine_ethcd_1.7067.7067.3	controllerType=0 controllerNumber=1 scan=7067	31.6741
03675:3	64	R.STYN[+2350.830]DTEDVSQASPSESEAR.F	HexNAc(4)Hex(5)Fuc(1)NeuAc(2)	N[+2351]	1508.59	3	4523.74	4523.75	0	-0.8	66	Specific	328.47	211.41	211.41	4.65	2	>sp|Q6GTX8|LAIR1_HUMAN Leukocyte-associated immunoglobulin-like receptor 1 OS=Homo sapiens OX=9606 GN=LAIR1 PE=1 SV=1	7425	20210911_zy_urine_ethcd_1.4038.4038.3	controllerType=0 controllerNumber=1 scan=4038	18.0374
13510:3	3	K.EN[+2204.772]LTAPGSDSAVFFEQGTTR.I	HexNAc(4)Hex(5)NeuAc(2)	N[+2205]	1444.59	3	4331.76	4331.77	0	-1.9	396	Specific	328.65	196.88	196.88	6.37	26	>sp|P00450|CERU_HUMAN Ceruloplasmin OS=Homo sapiens OX=9606 GN=CP PE=1 SV=1	460	20210911_zy_urine_ethcd_1.14816.14816.3	controllerType=0 controllerNumber=1 scan=14816	66.1782
01836:3	20	R.EEQYN[+2059.735]STYR.V	HexNAc(4)Hex(5)Fuc(1)NeuAc(1)	N[+2060]	1083.75	3	3249.24	3249.25	0	-2.6	295	Specific	328.77	119.66	119.66	6.09	13	>sp|P0DOX5|IGG1_HUMAN Immunoglobulin gamma-1 heavy chain OS=Homo sapiens OX=9606 PE=1 SV=2	10252	20210911_zy_urine_ethcd_1.2021.2021.3	controllerType=0 controllerNumber=1 scan=2021	9.2178
03431:3	32	R.SLHVPGLN[+2059.735]K.T	HexNAc(4)Hex(5)Fuc(1)NeuAc(1)	N[+2060]	1008.77	3	3024.29	3024.29	0	-2.1	191	Specific	329.2	117.33	117.33	6.31	7	>sp|P30530|UFO_HUMAN Tyrosine-protein kinase receptor UFO OS=Homo sapiens OX=9606 GN=AXL PE=1 SV=4	18964	20210911_zy_urine_ethcd_1.3770.3770.3	controllerType=0 controllerNumber=1 scan=3770	16.8255
02718:3	24	K.AAIPSALDTN[+2336.851]SSK.S	HexNAc(6)Hex(6)Fuc(1)	N[+2337]	1204.51	3	3611.5	3611.51	0	-1.9	542	Specific	329.64	215.61	215.61	6.21	11	>sp|Q08380|LG3BP_HUMAN Galectin-3-binding protein OS=Homo sapiens OX=9606 GN=LGALS3BP PE=1 SV=1	4876	20210911_zy_urine_ethcd_1.2987.2987.3	controllerType=0 controllerNumber=1 scan=2987	13.3241
01188:3	20	K.PREEQYN[+1768.640]STYR.V	HexNAc(4)Hex(5)Fuc(1)	N[+1769]	1071.1	3	3211.3	3211.31	0	-2.7	293	Specific	331.2	84.94	84.94	5.04	13	>sp|P0DOX5|IGG1_HUMAN Immunoglobulin gamma-1 heavy chain OS=Homo sapiens OX=9606 PE=1 SV=2	10252	20210911_zy_urine_ethcd_1.1311.1311.3	controllerType=0 controllerNumber=1 scan=1311	6.1023
01927:3	14	R.EEQFN[+1971.719]STYR.V	HexNAc(5)Hex(5)Fuc(1)	N[+1972]	1049.08	3	3145.23	3145.24	0	-2.5	173	Specific	331.23	135.35	135.35	6.04	17	>sp|P01861|IGHG4_HUMAN Immunoglobulin heavy constant gamma 4 OS=Homo sapiens OX=9606 GN=IGHG4 PE=1 SV=1	12793	20210911_zy_urine_ethcd_1.2120.2120.3	controllerType=0 controllerNumber=1 scan=2120	9.6186
06988:3	53	R.HLYTTTGGETDFTN[+1864.634]VTSLR.G	HexNAc(2)Hex(9)	N[+1865]	1326.56	3	3977.65	3977.65	0	-0.1	393	Specific	331.43	228.88	228.88	5.71	3	>sp|Q99523|SORT_HUMAN Sortilin OS=Homo sapiens OX=9606 GN=SORT1 PE=1 SV=3	15998	20210911_zy_urine_ethcd_1.7674.7674.3	controllerType=0 controllerNumber=1 scan=7674	34.3781
03054:3	8	R.FGC[+57.021]EIENN[+2407.852]R.S	HexNAc(5)Hex(5)NeuAc(2)	C[+57], N[+2408]	1182.79	3	3546.34	3546.35	0	-1.7	121	Specific	331.55	167.82	167.82	6.15	33	>sp|P25311|ZA2G_HUMAN Zinc-alpha-2-glycoprotein OS=Homo sapiens OX=9606 GN=AZGP1 PE=1 SV=2	18783	20210911_zy_urine_ethcd_1.3355.3355.3	controllerType=0 controllerNumber=1 scan=3355	14.9292
01302:3	22	R.EGN[+1971.719]ATGHLVGR.Y	HexNAc(5)Hex(5)Fuc(1)	N[+1972]	1028.1	3	3082.28	3082.28	0	-2.6	1800	Specific	331.88	165.07	165.07	5.51	16	>sp|O60494|CUBN_HUMAN Cubilin OS=Homo sapiens OX=9606 GN=CUBN PE=1 SV=5	6499	20210911_zy_urine_ethcd_1.1437.1437.3	controllerType=0 controllerNumber=1 scan=1437	6.6847
05361:4	43	R.PVTPIAQN[+2204.772]QTTLGSSR.A	HexNAc(4)Hex(5)NeuAc(2)	N[+2205]	969.419	4	3874.65	3874.66	0	-1.6	235	Specific	332.06	245.98	245.98	6.09	4	>sp|Q9NZP8|C1RL_HUMAN Complement C1r subcomponent-like protein OS=Homo sapiens OX=9606 GN=C1RL PE=1 SV=2	126	20210911_zy_urine_ethcd_1.5889.5889.4	controllerType=0 controllerNumber=1 scan=5889	26.4056
11869:3	19	K.VVLHPN[+1913.677]YSQVDIGLIK.L	HexNAc(4)Hex(5)NeuAc(1)	N[+1914]	1236.9	3	3708.68	3708.69	0	-2.6	236	Specific	332.35	167.43	167.43	6.38	20	>sp|P00738|HPT_HUMAN Haptoglobin OS=Homo sapiens OX=9606 GN=HP PE=1 SV=1	3044	20210911_zy_urine_ethcd_1.13021.13021.3	controllerType=0 controllerNumber=1 scan=13021	58.2449
07521:3	46	R.GGYIFPTQQPN[+2481.889]TTTLASR.K	HexNAc(6)Hex(6)NeuAc(1)	N[+2482]	1478.97	3	4434.88	4433.88	1	1	817	Specific	332.45	92.65	92.65	6.01	5	>sp|O43451|MGA_HUMAN Maltase-glucoamylase, intestinal OS=Homo sapiens OX=9606 GN=MGAM PE=1 SV=5	7929	20210911_zy_urine_ethcd_1.8258.8258.3	controllerType=0 controllerNumber=1 scan=8258	36.97
10149:3	7	R.C[+57.021]IQAN[+2861.000]YSLMENGK.I	HexNAc(5)Hex(6)NeuAc(3)	C[+57], N[+2861]	1463.57	3	4388.69	4388.69	0	-1.7	61	Specific	332.54	218.01	218.01	6.03	25	>sp|P05090|APOD_HUMAN Apolipoprotein D OS=Homo sapiens OX=9606 GN=APOD PE=1 SV=1	120	20210911_zy_urine_ethcd_1.11137.11137.3	controllerType=0 controllerNumber=1 scan=11137	49.8322
04112:3	54	R.KFDVNQLQN[+1540.529]TTIK.R	HexNAc(2)Hex(7)	N[+1541]	1030.46	3	3089.36	3089.37	0	-2.3	706	Specific	332.84	219.48	219.48	6.29	5	>sp|P12821|ACE_HUMAN Angiotensin-converting enzyme OS=Homo sapiens OX=9606 GN=ACE PE=1 SV=1	527	20210911_zy_urine_ethcd_1.4518.4518.3	controllerType=0 controllerNumber=1 scan=4518	20.2142
10597:3	2	R.QDQC[+57.021]IYN[+2715.963]TTYLNVQR.E	HexNAc(5)Hex(6)Fuc(1)NeuAc(2)	C[+57], N[+2716]	1544.62	3	4631.86	4631.86	0	0.1	87	Specific	333.08	203.51	203.51	6.22	53	>sp|P02763|A1AG1_HUMAN Alpha-1-acid glycoprotein 1 OS=Homo sapiens OX=9606 GN=ORM1 PE=1 SV=1	2208	20210911_zy_urine_ethcd_1.11627.11627.3	controllerType=0 controllerNumber=1 scan=11627	51.9943
09813:3	9	K.C[+57.021]GLVPVLAENYN[+2075.730]K.S	HexNAc(4)Hex(6)NeuAc(1)	C[+57], N[+2076]	1184.83	3	3552.48	3552.48	0	-1.2	421	Specific	334.01	201.35	201.35	6.03	20	>sp|P02787|TRFE_HUMAN Serotransferrin OS=Homo sapiens OX=9606 GN=TF PE=1 SV=3	18223	20210911_zy_urine_ethcd_1.10769.10769.3	controllerType=0 controllerNumber=1 scan=10769	48.2022
14253:3	29	K.ALPQPQN[+2204.772]VTSLLGC[+57.021]TH.-	HexNAc(4)Hex(5)NeuAc(2)	C[+57], N[+2205]	1314.22	3	3940.64	3940.65	0	-2.3	447	CRagged	334.04	200.57	200.57	6.37	8	>sp|P02790|HEMO_HUMAN Hemopexin OS=Homo sapiens OX=9606 GN=HPX PE=1 SV=2	9336	20210911_zy_urine_ethcd_1.15628.15628.4	controllerType=0 controllerNumber=1 scan=15628	69.714
01553:3	11	R.GHVN[+2204.772]ITR.S	HexNAc(4)Hex(5)NeuAc(2)	N[+2205]	1001.07	3	3001.21	3001.21	0	-2.2	118	Specific	334.11	121.12	121.12	5.63	13	>sp|P00734|THRB_HUMAN Prothrombin OS=Homo sapiens OX=9606 GN=F2 PE=1 SV=2	18404	20210911_zy_urine_ethcd_1.1712.1712.3	controllerType=0 controllerNumber=1 scan=1712	7.8983
02392:3	47	K.MFSQN[+2204.772]DTR.C	HexNAc(4)Hex(5)NeuAc(2)	N[+2205]	1068.41	3	3203.2	3203.21	0	-2.3	321	Specific	334.59	135.56	135.56	5.37	5	>sp|P02750|A2GL_HUMAN Leucine-rich alpha-2-glycoprotein OS=Homo sapiens OX=9606 GN=LRG1 PE=1 SV=2	1095	20210911_zy_urine_ethcd_1.2628.2628.3	controllerType=0 controllerNumber=1 scan=2628	11.7661
12611:3	9	K.C[+57.021]GLVPVLAENYN[+2569.905]K.S	HexNAc(5)Hex(6)NeuAc(2)	C[+57], N[+2570]	1349.56	3	4046.66	4046.66	0	-0.2	421	Specific	334.63	212.28	212.28	5.43	20	>sp|P02787|TRFE_HUMAN Serotransferrin OS=Homo sapiens OX=9606 GN=TF PE=1 SV=3	18223	20210911_zy_urine_ethcd_1.13833.13833.3	controllerType=0 controllerNumber=1 scan=13833	61.8402
12658:4	4	R.QNQC[+57.021]FYN[+2861.000]SSYLNVQR.E	HexNAc(5)Hex(6)NeuAc(3)	C[+57], N[+2861]	1196.47	4	4782.85	4781.87	1	-4.2	87	Specific	334.66	224.84	224.84	7.05	34	>sp|P19652|A1AG2_HUMAN Alpha-1-acid glycoprotein 2 OS=Homo sapiens OX=9606 GN=ORM2 PE=1 SV=2	4531	20210911_zy_urine_ethcd_1.13884.13884.4	controllerType=0 controllerNumber=1 scan=13884	62.0657
01994:3	50	K.VTAC[+57.021]HSSQPN[+1913.677]ATLYK.M	HexNAc(4)Hex(5)NeuAc(1)	C[+57], N[+1914]	1197.5	3	3590.48	3590.48	0	-1	27	Specific	335.04	114.24	114.24	6.66	2	>sp|P05543|THBG_HUMAN Thyroxine-binding globulin OS=Homo sapiens OX=9606 GN=SERPINA7 PE=1 SV=2	13666	20210911_zy_urine_ethcd_1.2193.2193.3	controllerType=0 controllerNumber=1 scan=2193	9.9232
03625:3	25	R.AN[+1809.666]LTTLAGTHTNIPK.L	HexNAc(5)Hex(4)Fuc(1)	N[+1810]	1121.17	3	3361.51	3361.51	0	-2.2	56	Specific	335.1	156.94	156.94	7	10	>sp|P16444|DPEP1_HUMAN Dipeptidase 1 OS=Homo sapiens OX=9606 GN=DPEP1 PE=1 SV=3	2717	20210911_zy_urine_ethcd_1.3983.3983.3	controllerType=0 controllerNumber=1 scan=3983	17.7911
02372:3	10	R.EEQFN[+1930.692]STFR.V	HexNAc(4)Hex(6)Fuc(1)	N[+1931]	1030.08	3	3088.21	3088.21	0	-1.1	172	Specific	336.09	167.53	167.53	5.97	27	>sp|P01859|IGHG2_HUMAN Immunoglobulin heavy constant gamma 2 OS=Homo sapiens OX=9606 GN=IGHG2 PE=1 SV=2	2858	20210911_zy_urine_ethcd_1.2606.2606.3	controllerType=0 controllerNumber=1 scan=2606	11.667
03924:4	11	R.SRYPHKPEIN[+1913.677]STTHPGADLQENFC[+57.021]R.N	HexNAc(4)Hex(5)NeuAc(1)	C[+57], N[+1914]	1217.77	4	4868.06	4868.07	0	-3.5	134	Specific	336.17	251.58	251.58	6.45	13	>sp|P00734|THRB_HUMAN Prothrombin OS=Homo sapiens OX=9606 GN=F2 PE=1 SV=2	18404	20210911_zy_urine_ethcd_1.4311.4311.4	controllerType=0 controllerNumber=1 scan=4311	19.2763
09667:3	9	K.C[+57.021]GLVPVLAENYN[+2278.809]K.S	HexNAc(5)Hex(6)NeuAc(1)	C[+57], N[+2279]	1252.52	3	3755.56	3755.56	0	-1.1	421	Specific	337.8	211.01	211.01	6.03	20	>sp|P02787|TRFE_HUMAN Serotransferrin OS=Homo sapiens OX=9606 GN=TF PE=1 SV=3	18223	20210911_zy_urine_ethcd_1.10609.10609.3	controllerType=0 controllerNumber=1 scan=10609	47.4857
03857:3	39	R.DIENFN[+2204.772]STQK.F	HexNAc(4)Hex(5)NeuAc(2)	N[+2205]	1134.11	3	3400.32	3400.33	0	-2.4	28	Specific	337.89	179.4	179.4	5.43	7	>sp|P43652|AFAM_HUMAN Afamin OS=Homo sapiens OX=9606 GN=AFM PE=1 SV=1	20367	20210911_zy_urine_ethcd_1.4238.4238.3	controllerType=0 controllerNumber=1 scan=4238	18.9398
01201:3	20	K.PREEQYN[+1444.534]STYR.V	HexNAc(4)Hex(3)Fuc(1)	N[+1445]	963.07	3	2887.2	2887.2	0	-1.6	293	Specific	337.98	94.01	94.01	4.55	13	>sp|P0DOX5|IGG1_HUMAN Immunoglobulin gamma-1 heavy chain OS=Homo sapiens OX=9606 PE=1 SV=2	10252	20210911_zy_urine_ethcd_1.1326.1326.3	controllerType=0 controllerNumber=1 scan=1326	6.1683
06991:3	3	K.EHEGAIYPDN[+3007.058]TTDFQR.A	HexNAc(5)Hex(6)Fuc(1)NeuAc(3)	N[+3007]	1633.96	3	4899.88	4899.9	0	-4.3	129	Specific	338.1	234.83	234.83	6.37	26	>sp|P00450|CERU_HUMAN Ceruloplasmin OS=Homo sapiens OX=9606 GN=CP PE=1 SV=1	460	20210911_zy_urine_ethcd_1.7677.7677.3	controllerType=0 controllerNumber=1 scan=7677	34.392
04531:3	25	K.AN[+1971.719]LSQVADHLDHIK.E	HexNAc(5)Hex(5)Fuc(1)	N[+1972]	1178.18	3	3532.53	3532.53	0	-1	278	Specific	338.31	200.78	200.78	5.28	10	>sp|P16444|DPEP1_HUMAN Dipeptidase 1 OS=Homo sapiens OX=9606 GN=DPEP1 PE=1 SV=3	2717	20210911_zy_urine_ethcd_1.4978.4978.3	controllerType=0 controllerNumber=1 scan=4978	22.292
03655:3	25	R.AN[+1971.719]LTTLAGTHTNIPK.L	HexNAc(5)Hex(5)Fuc(1)	N[+1972]	1175.19	3	3523.56	3523.57	0	-2	56	Specific	338.83	165.84	165.84	6.98	10	>sp|P16444|DPEP1_HUMAN Dipeptidase 1 OS=Homo sapiens OX=9606 GN=DPEP1 PE=1 SV=3	2717	20210911_zy_urine_ethcd_1.4016.4016.3	controllerType=0 controllerNumber=1 scan=4016	17.9366
08714:3	29	R.SWPAVGN[+2350.830]C[+57.021]SSALR.W	HexNAc(4)Hex(5)Fuc(1)NeuAc(2)	C[+57], N[+2351]	1252.5	3	3755.49	3755.5	0	-2.2	181	Specific	339.33	198.29	198.29	6.18	8	>sp|P02790|HEMO_HUMAN Hemopexin OS=Homo sapiens OX=9606 GN=HPX PE=1 SV=2	9336	20210911_zy_urine_ethcd_1.9564.9564.3	controllerType=0 controllerNumber=1 scan=9564	42.7766
05941:3	12	R.ITYSIVQTN[+2715.963]C[+57.021]SK.E	HexNAc(5)Hex(6)Fuc(1)NeuAc(2)	C[+57], N[+2716]	1377.22	3	4129.65	4129.67	0	-4.3	197	Specific	340.61	164.25	164.25	5.54	26	>sp|P01042|KNG1_HUMAN Kininogen-1 OS=Homo sapiens OX=9606 GN=KNG1 PE=1 SV=2	6533	20210911_zy_urine_ethcd_1.6524.6524.3	controllerType=0 controllerNumber=1 scan=6524	29.2588
14018:3	2	R.QDQC[+57.021]IYN[+3007.058]TTYLNVQR.E	HexNAc(5)Hex(6)Fuc(1)NeuAc(3)	C[+57], N[+3007]	1641.65	3	4922.95	4922.95	0	-1.8	87	Specific	340.85	220.8	220.8	6.91	53	>sp|P02763|A1AG1_HUMAN Alpha-1-acid glycoprotein 1 OS=Homo sapiens OX=9606 GN=ORM1 PE=1 SV=1	2208	20210911_zy_urine_ethcd_1.15371.15371.3	controllerType=0 controllerNumber=1 scan=15371	68.6011
06129:3	12	R.ITYSIVQTN[+2391.857]C[+57.021]SK.E	HexNAc(5)Hex(4)Fuc(1)NeuAc(2)	C[+57], N[+2392]	1269.19	3	3805.55	3805.56	0	-2.4	197	Specific	342.78	209.68	209.68	5.75	26	>sp|P01042|KNG1_HUMAN Kininogen-1 OS=Homo sapiens OX=9606 GN=KNG1 PE=1 SV=2	6533	20210911_zy_urine_ethcd_1.6731.6731.3	controllerType=0 controllerNumber=1 scan=6731	30.1905
10875:3	16	K.TAVN[+2350.830]C[+57.021]SSDFDAC[+57.021]LITK.A	HexNAc(4)Hex(5)Fuc(1)NeuAc(2)	C[+57]*2, N[+2351]	1384.88	3	4152.63	4152.64	0	-1.4	40	Specific	342.8	240.48	240.48	6.26	11	>sp|P13987|CD59_HUMAN CD59 glycoprotein OS=Homo sapiens OX=9606 GN=CD59 PE=1 SV=1	1116	20210911_zy_urine_ethcd_1.11931.11931.2	controllerType=0 controllerNumber=1 scan=11931	53.3417
06560:3	36	K.TC[+57.021]DWLPKPN[+1694.603]MSASC[+57.021]K.E	HexNAc(3)Hex(4)Fuc(1)NeuAc(1)	C[+57]*2, N[+1695]	1163.8	3	3489.39	3489.4	0	-3.2	93	Specific	342.9	218.52	218.52	6.62	9	>sp|P07602|SAP_HUMAN Prosaposin OS=Homo sapiens OX=9606 GN=PSAP PE=1 SV=2	14314	20210911_zy_urine_ethcd_1.7203.7203.3	controllerType=0 controllerNumber=1 scan=7203	32.2791
02485:3	30	K.PSAGN[+2204.772]NSLYR.D	HexNAc(4)Hex(5)NeuAc(2)	N[+2205]	1095.1	3	3283.3	3283.3	0	-1	158	Specific	343.16	110.01	110.01	5.16	7	>sp|P02749|APOH_HUMAN Beta-2-glycoprotein 1 OS=Homo sapiens OX=9606 GN=APOH PE=1 SV=3	19971	20210911_zy_urine_ethcd_1.2730.2730.3	controllerType=0 controllerNumber=1 scan=2730	12.1954
10786:3	2	R.QDQC[+57.021]IYN[+2204.772]TTYLNVQR.E	HexNAc(4)Hex(5)NeuAc(2)	C[+57], N[+2205]	1373.89	3	4119.66	4120.67	-1	-0.6	87	Specific	343.38	189.39	189.39	6.65	53	>sp|P02763|A1AG1_HUMAN Alpha-1-acid glycoprotein 1 OS=Homo sapiens OX=9606 GN=ORM1 PE=1 SV=1	2208	20210911_zy_urine_ethcd_1.11834.11834.3	controllerType=0 controllerNumber=1 scan=11834	52.9109
09258:3	22	R.C[+57.021]GSN[+1702.581]FTGPSGYIISPNYPK.Q	HexNAc(2)Hex(8)	C[+57], N[+1703]	1254.52	3	3761.53	3761.54	0	-2.4	2920	Specific	343.44	249.41	249.41	6.15	16	>sp|O60494|CUBN_HUMAN Cubilin OS=Homo sapiens OX=9606 GN=CUBN PE=1 SV=5	6499	20210911_zy_urine_ethcd_1.10160.10160.3	controllerType=0 controllerNumber=1 scan=10160	45.466
13488:3	7	R.ADGTVNQIEGEATPVN[+3007.058]LTEPAK.L	HexNAc(5)Hex(6)Fuc(1)NeuAc(3)	N[+3007]	1754.4	3	5261.17	5261.18	0	-0.8	83	Specific	343.67	177.49	177.49	6.81	25	>sp|P05090|APOD_HUMAN Apolipoprotein D OS=Homo sapiens OX=9606 GN=APOD PE=1 SV=1	120	20210911_zy_urine_ethcd_1.14792.14792.3	controllerType=0 controllerNumber=1 scan=14792	66.0705
14564:3	33	K.SVVAPATDGGLN[+2262.814]LTSTFLR.K	HexNAc(5)Hex(5)Fuc(1)NeuAc(1)	N[+2263]	1394.62	3	4181.84	4181.84	0	0.6	67	Specific	343.76	221.3	221.3	5.37	11	>sp|P41222|PTGDS_HUMAN Prostaglandin-H2 D-isomerase OS=Homo sapiens OX=9606 GN=PTGDS PE=1 SV=1	16974	20210911_zy_urine_ethcd_1.15968.15968.3	controllerType=0 controllerNumber=1 scan=15968	71.2044
09462:3	8	K.DIVEYYNDSN[+2350.830]GSHVLQGR.F	HexNAc(4)Hex(5)Fuc(1)NeuAc(2)	N[+2351]	1473.26	3	4417.76	4416.79	1	-5.9	103	Specific	343.96	181.94	2.32	6.5	33	>sp|P25311|ZA2G_HUMAN Zinc-alpha-2-glycoprotein OS=Homo sapiens OX=9606 GN=AZGP1 PE=1 SV=2	18783	20210911_zy_urine_ethcd_1.10384.10384.3	controllerType=0 controllerNumber=1 scan=10384	46.4622
10195:3	4	R.QNQC[+57.021]FYN[+2569.905]SSYLNVQR.E	HexNAc(5)Hex(6)NeuAc(2)	C[+57], N[+2570]	1497.26	3	4489.77	4490.77	-1	1	87	Specific	344.55	201.34	201.34	6.16	34	>sp|P19652|A1AG2_HUMAN Alpha-1-acid glycoprotein 2 OS=Homo sapiens OX=9606 GN=ORM2 PE=1 SV=2	4531	20210911_zy_urine_ethcd_1.11187.11187.3	controllerType=0 controllerNumber=1 scan=11187	50.051
14156:3	9	R.QQQHLFGSN[+2204.772]VTDC[+57.021]SGNFC[+57.021]LFR.S	HexNAc(4)Hex(5)NeuAc(2)	C[+57]*2, N[+2205]	1573.63	3	4718.88	4719.9	-1	-3.4	622	Specific	344.65	212.28	212.28	7.18	20	>sp|P02787|TRFE_HUMAN Serotransferrin OS=Homo sapiens OX=9606 GN=TF PE=1 SV=3	18223	20210911_zy_urine_ethcd_1.15522.15522.3	controllerType=0 controllerNumber=1 scan=15522	69.2525
03589:3	25	R.AN[+1971.719]LTTLAGTHTNIPK.L	HexNAc(5)Hex(5)Fuc(1)	N[+1972]	1175.19	3	3523.56	3523.57	0	-2.7	56	Specific	344.77	207.13	207.13	6.86	10	>sp|P16444|DPEP1_HUMAN Dipeptidase 1 OS=Homo sapiens OX=9606 GN=DPEP1 PE=1 SV=3	2717	20210911_zy_urine_ethcd_1.3943.3943.3	controllerType=0 controllerNumber=1 scan=3943	17.6142
01495:2	20	R.EEQYN[+1444.534]STYR.V	HexNAc(4)Hex(3)Fuc(1)	N[+1445]	1317.52	2	2634.04	2634.05	0	-2.1	295	Specific	344.84	185.36	185.36	6.22	13	>sp|P0DOX5|IGG1_HUMAN Immunoglobulin gamma-1 heavy chain OS=Homo sapiens OX=9606 PE=1 SV=2	10252	20210911_zy_urine_ethcd_1.1649.1649.2	controllerType=0 controllerNumber=1 scan=1649	7.6354
01803:3	10	K.TKPREEQFN[+1444.534]STFR.V	HexNAc(4)Hex(3)Fuc(1)	N[+1445]	1028.79	3	3084.35	3084.35	0	-1.4	168	Specific	344.91	211.35	211.35	5.06	27	>sp|P01859|IGHG2_HUMAN Immunoglobulin heavy constant gamma 2 OS=Homo sapiens OX=9606 GN=IGHG2 PE=1 SV=2	2858	20210911_zy_urine_ethcd_1.1985.1985.3	controllerType=0 controllerNumber=1 scan=1985	9.0652
02521:3	10	K.PREEQFN[+2059.735]STFR.V	HexNAc(4)Hex(5)Fuc(1)NeuAc(1)	N[+2060]	1157.47	3	3470.4	3470.41	0	-3	170	Specific	345.3	191.26	191.26	4.71	27	>sp|P01859|IGHG2_HUMAN Immunoglobulin heavy constant gamma 2 OS=Homo sapiens OX=9606 GN=IGHG2 PE=1 SV=2	2858	20210911_zy_urine_ethcd_1.2771.2771.3	controllerType=0 controllerNumber=1 scan=2771	12.3591
11624:3	3	K.EN[+1913.677]LTAPGSDSAVFFEQGTTR.I	HexNAc(4)Hex(5)NeuAc(1)	N[+1914]	1347.56	3	4040.67	4040.68	0	-0.9	396	Specific	345.61	202.98	202.98	5.92	26	>sp|P00450|CERU_HUMAN Ceruloplasmin OS=Homo sapiens OX=9606 GN=CP PE=1 SV=1	460	20210911_zy_urine_ethcd_1.12752.12752.3	controllerType=0 controllerNumber=1 scan=12752	57.0156
04429:3	34	R.EN[+2059.735]ISDPTSPLR.T	HexNAc(4)Hex(5)Fuc(1)NeuAc(1)	N[+2060]	1096.79	3	3288.34	3288.35	0	-2.6	70	Specific	345.62	179.55	179.55	5.35	7	>sp|P01591|IGJ_HUMAN Immunoglobulin J chain OS=Homo sapiens OX=9606 GN=JCHAIN PE=1 SV=4	4401	20210911_zy_urine_ethcd_1.4866.4866.3	controllerType=0 controllerNumber=1 scan=4866	21.7866
12294:4	28	R.C[+57.021]LNWLDAQSGLASAPVSGAGN[+2059.735]HSYC[+57.021]R.N	HexNAc(4)Hex(5)Fuc(1)NeuAc(1)	C[+57]*2, N[+2060]	1213.5	4	4850.99	4851	0	-2.5	46	Specific	345.63	261.46	261.46	6.91	4	>sp|Q96FE7|P3IP1_HUMAN Phosphoinositide-3-kinase-interacting protein 1 OS=Homo sapiens OX=9606 GN=PIK3IP1 PE=1 SV=2	11936	20210911_zy_urine_ethcd_1.13486.13486.4	controllerType=0 controllerNumber=1 scan=13486	60.3194
06559:3	3	K.ELHHLQEQN[+2204.772]VSNAFLDK.G	HexNAc(4)Hex(5)NeuAc(2)	N[+2205]	1409.59	3	4226.77	4226.78	0	-2.4	754	Specific	345.64	206.3	206.3	6.31	26	>sp|P00450|CERU_HUMAN Ceruloplasmin OS=Homo sapiens OX=9606 GN=CP PE=1 SV=1	460	20210911_zy_urine_ethcd_1.7202.7202.3	controllerType=0 controllerNumber=1 scan=7202	32.2739
09360:3	22	R.C[+57.021]GSN[+1540.529]FTGPSGYIISPNYPK.Q	HexNAc(2)Hex(7)	C[+57], N[+1541]	1200.5	3	3599.48	3599.49	0	-3	2920	Specific	346.25	244.97	244.97	5.91	16	>sp|O60494|CUBN_HUMAN Cubilin OS=Homo sapiens OX=9606 GN=CUBN PE=1 SV=5	6499	20210911_zy_urine_ethcd_1.10272.10272.3	controllerType=0 controllerNumber=1 scan=10272	45.9576
12874:3	2	R.QDQC[+57.021]IYN[+3007.058]TTYLNVQR.E	HexNAc(5)Hex(6)Fuc(1)NeuAc(3)	C[+57], N[+3007]	1641.66	3	4922.95	4922.95	0	-0.7	87	Specific	346.36	199.47	199.47	6.49	53	>sp|P02763|A1AG1_HUMAN Alpha-1-acid glycoprotein 1 OS=Homo sapiens OX=9606 GN=ORM1 PE=1 SV=1	2208	20210911_zy_urine_ethcd_1.14121.14121.3	controllerType=0 controllerNumber=1 scan=14121	63.1167
09888:3	4	R.QNQC[+57.021]FYN[+2935.037]SSYLNVQR.E	HexNAc(6)Hex(7)NeuAc(2)	C[+57], N[+2935]	1619.3	3	4855.89	4855.9	0	-2.4	87	Specific	346.42	219.58	219.58	6.78	34	>sp|P19652|A1AG2_HUMAN Alpha-1-acid glycoprotein 2 OS=Homo sapiens OX=9606 GN=ORM2 PE=1 SV=2	4531	20210911_zy_urine_ethcd_1.10851.10851.3	controllerType=0 controllerNumber=1 scan=10851	48.5613
01947:3	21	K.SN[+3446.227]SSMHITDC[+57.021]R.L	HexNAc(7)Hex(8)Fuc(1)NeuAc(2)	C[+57], N[+3446]	1584.93	3	4752.77	4753.77	-1	-0.3	103	Specific	346.61	170.56	170.56	4.95	25	>sp|P07998|RNAS1_HUMAN Ribonuclease pancreatic OS=Homo sapiens OX=9606 GN=RNASE1 PE=1 SV=4	14690	20210911_zy_urine_ethcd_1.2141.2141.3	controllerType=0 controllerNumber=1 scan=2141	9.7071
11856:3	19	K.VVLHPN[+1913.677]YSQVDIGLIK.L	HexNAc(4)Hex(5)NeuAc(1)	N[+1914]	1236.9	3	3708.68	3708.69	0	-1.7	236	Specific	346.77	156.79	156.79	6.26	20	>sp|P00738|HPT_HUMAN Haptoglobin OS=Homo sapiens OX=9606 GN=HP PE=1 SV=1	3044	20210911_zy_urine_ethcd_1.13006.13006.3	controllerType=0 controllerNumber=1 scan=13006	58.1805
09814:3	7	R.ADGTVNQIEGEATPVN[+2059.735]LTEPAK.L	HexNAc(4)Hex(5)Fuc(1)NeuAc(1)	N[+2060]	1438.62	3	4313.85	4313.85	0	-2	83	Specific	346.83	216.98	216.98	7.31	25	>sp|P05090|APOD_HUMAN Apolipoprotein D OS=Homo sapiens OX=9606 GN=APOD PE=1 SV=1	120	20210911_zy_urine_ethcd_1.10770.10770.3	controllerType=0 controllerNumber=1 scan=10770	48.2068
09017:4	17	R.LAGKPTHVN[+2553.910]VSVVM[+15.995]AEVDGTC[+57.021].Y	HexNAc(5)Hex(5)Fuc(1)NeuAc(2)	C[+57], M[+16], N[+2554]	1189.25	4	4753.98	4753.98	0	-1.3	332	CRagged	346.94	221.89	98.38	6.83	16	>sp|P01876|IGHA1_HUMAN Immunoglobulin heavy constant alpha 1 OS=Homo sapiens OX=9606 GN=IGHA1 PE=1 SV=2	9091	20210911_zy_urine_ethcd_1.9897.9897.4	controllerType=0 controllerNumber=1 scan=9897	44.2829
15063:4	1	R.FALLM[+15.995]TNC[+57.021]YATPSSN[+3007.058]ATDPLK.Y	HexNAc(5)Hex(6)Fuc(1)NeuAc(3)	C[+57], M[+16], N[+3007]	1335.29	4	5338.13	5338.16	0	-4.5	499	Specific	346.98	279.87	279.87	7.3	49	>sp|P07911|UROM_HUMAN Uromodulin OS=Homo sapiens OX=9606 GN=UMOD PE=1 SV=1	16609	20210911_zy_urine_ethcd_1.16514.16514.4	controllerType=0 controllerNumber=1 scan=16514	73.6111
10108:3	9	K.C[+57.021]GLVPVLAENYN[+1913.677]K.S	HexNAc(4)Hex(5)NeuAc(1)	C[+57], N[+1914]	1130.81	3	3390.42	3390.43	0	-2	421	Specific	347.81	228.95	228.95	6.13	20	>sp|P02787|TRFE_HUMAN Serotransferrin OS=Homo sapiens OX=9606 GN=TF PE=1 SV=3	18223	20210911_zy_urine_ethcd_1.11092.11092.3	controllerType=0 controllerNumber=1 scan=11092	49.633
08375:3	12	R.ITYSIVQTN[+3048.084]C[+57.021]SK.E	HexNAc(6)Hex(5)Fuc(1)NeuAc(3)	C[+57], N[+3048]	1487.93	3	4461.79	4461.79	0	0	197	Specific	347.9	202.91	202.91	5.11	26	>sp|P01042|KNG1_HUMAN Kininogen-1 OS=Homo sapiens OX=9606 GN=KNG1 PE=1 SV=2	6533	20210911_zy_urine_ethcd_1.9193.9193.3	controllerType=0 controllerNumber=1 scan=9193	41.129
05136:3	48	R.QAIHVGN[+1216.423]QTFNDGTIVEK.Y	HexNAc(2)Hex(5)	N[+1216]	1063.14	3	3187.41	3187.42	0	-2.7	340	Specific	348.07	283.77	283.77	6.77	3	>sp|Q9H3G5|CPVL_HUMAN Probable serine carboxypeptidase CPVL OS=Homo sapiens OX=9606 GN=CPVL PE=1 SV=2	298	20210911_zy_urine_ethcd_1.5642.5642.3	controllerType=0 controllerNumber=1 scan=5642	25.3002
06471:3	16	K.TAVN[+1971.719]C[+57.021]SSDFDAC[+57.021]LITK.A	HexNAc(5)Hex(5)Fuc(1)	C[+57]*2, N[+1972]	1258.51	3	3773.52	3773.53	0	-2.3	40	Specific	348.67	239.16	239.16	6.45	11	>sp|P13987|CD59_HUMAN CD59 glycoprotein OS=Homo sapiens OX=9606 GN=CD59 PE=1 SV=1	1116	20210911_zy_urine_ethcd_1.7105.7105.3	controllerType=0 controllerNumber=1 scan=7105	31.8404
06244:4	5	K.NC[+57.021]HHSGSQVPLIHC[+57.021]NLTTPSPQN[+2059.735]ISNC[+57.021]R.Y	HexNAc(4)Hex(5)Fuc(1)NeuAc(1)	C[+57]*3, N[+2060]	1322.8	4	5288.19	5288.22	0	-5.6	97	Specific	349.4	276.37	0.15	7.05	16	>sp|P10153|RNAS2_HUMAN Non-secretory ribonuclease OS=Homo sapiens OX=9606 GN=RNASE2 PE=1 SV=2	14694	20210911_zy_urine_ethcd_1.6857.6857.4	controllerType=0 controllerNumber=1 scan=6857	30.7497
00775:3	90	R.N[+2059.735]YSHHQLNR.S	HexNAc(4)Hex(5)Fuc(1)NeuAc(1)	N[+2060]	1076.77	3	3228.28	3228.3	0	-4.2	169	Specific	349.56	139.37	120.11	4.49	3	>sp|Q14515|SPRL1_HUMAN SPARC-like protein 1 OS=Homo sapiens OX=9606 GN=SPARCL1 PE=1 SV=2	3147	20210911_zy_urine_ethcd_1.859.859.3	controllerType=0 controllerNumber=1 scan=859	4.075
01862:3	2	R.NEEYN[+2861.000]K.S	HexNAc(5)Hex(6)NeuAc(3)	N[+2861]	1219.78	3	3657.34	3657.35	0	-2	52	Specific	349.68	66.62	66.62	4.9	53	>sp|P02763|A1AG1_HUMAN Alpha-1-acid glycoprotein 1 OS=Homo sapiens OX=9606 GN=ORM1 PE=1 SV=1	2208	20210911_zy_urine_ethcd_1.2049.2049.3	controllerType=0 controllerNumber=1 scan=2049	9.3315
06245:3	59	K.NN[+2204.772]ATVHEQVGGPSLTSDLQAQSK.G	HexNAc(4)Hex(5)NeuAc(2)	N[+2205]	1529.32	3	4585.94	4585.94	0	-0.6	85	Specific	349.76	217.08	217.08	5.89	4	>sp|P04004|VTNC_HUMAN Vitronectin OS=Homo sapiens OX=9606 GN=VTN PE=1 SV=1	17960	20210911_zy_urine_ethcd_1.6858.6858.3	controllerType=0 controllerNumber=1 scan=6858	30.754
02886:3	13	K.WN[+1663.608]NTGC[+57.021]QALPSQDEGPSK.A	HexNAc(5)Hex(4)	C[+57], N[+1664]	1218.16	3	3652.48	3652.48	0	-2.6	498	Specific	350.04	182.34	182.34	6.68	16	>sp|P01833|PIGR_HUMAN Polymeric immunoglobulin receptor OS=Homo sapiens OX=9606 GN=PIGR PE=1 SV=4	10083	20210911_zy_urine_ethcd_1.3171.3171.3	controllerType=0 controllerNumber=1 scan=3171	14.1457
05719:3	26	R.N[+2204.772]HSC[+57.021]SEGQISIFR.Y	HexNAc(4)Hex(5)NeuAc(2)	C[+57], N[+2205]	1247.16	3	3739.48	3739.48	0	-0.9	731	Specific	350.49	122.42	122.42	5.74	11	>sp|O75882|ATRN_HUMAN Attractin OS=Homo sapiens OX=9606 GN=ATRN PE=1 SV=2	8160	20210911_zy_urine_ethcd_1.6281.6281.3	controllerType=0 controllerNumber=1 scan=6281	28.1572
10645:3	2	R.QDQC[+57.021]IYN[+2350.830]TTYLNVQR.E	HexNAc(4)Hex(5)Fuc(1)NeuAc(2)	C[+57], N[+2351]	1422.91	3	4266.72	4266.73	0	-1.8	87	Specific	350.86	197.82	197.82	6.89	53	>sp|P02763|A1AG1_HUMAN Alpha-1-acid glycoprotein 1 OS=Homo sapiens OX=9606 GN=ORM1 PE=1 SV=1	2208	20210911_zy_urine_ethcd_1.11679.11679.3	controllerType=0 controllerNumber=1 scan=11679	52.2252
01041:3	11	R.GHVN[+1913.677]ITR.S	HexNAc(4)Hex(5)NeuAc(1)	N[+1914]	904.043	3	2710.11	2710.12	0	-2.3	118	Specific	351.22	111.84	111.84	5.41	13	>sp|P00734|THRB_HUMAN Prothrombin OS=Homo sapiens OX=9606 GN=F2 PE=1 SV=2	18404	20210911_zy_urine_ethcd_1.1150.1150.3	controllerType=0 controllerNumber=1 scan=1150	5.3549
03972:3	23	R.LHEITN[+2350.830]ETFR.G	HexNAc(4)Hex(5)Fuc(1)NeuAc(2)	N[+2351]	1204.16	3	3610.46	3610.47	0	-1.1	112	Specific	351.22	149.8	149.8	5.4	11	>sp|Q6EMK4|VASN_HUMAN Vasorin OS=Homo sapiens OX=9606 GN=VASN PE=1 SV=1	18175	20210911_zy_urine_ethcd_1.4364.4364.3	controllerType=0 controllerNumber=1 scan=4364	19.5149
08497:3	12	R.ITYSIVQTN[+3007.058]C[+57.021]SK.E	HexNAc(5)Hex(6)Fuc(1)NeuAc(3)	C[+57], N[+3007]	1473.92	3	4419.76	4420.76	-1	0.3	197	Specific	351.35	199.39	199.39	5.08	26	>sp|P01042|KNG1_HUMAN Kininogen-1 OS=Homo sapiens OX=9606 GN=KNG1 PE=1 SV=2	6533	20210911_zy_urine_ethcd_1.9326.9326.3	controllerType=0 controllerNumber=1 scan=9326	41.7095
07531:3	31	K.NYHQPAILN[+2350.830]SSALR.Q	HexNAc(4)Hex(5)Fuc(1)NeuAc(2)	N[+2351]	1312.22	3	3934.65	3934.66	0	-2.2	41	Specific	351.57	189.99	189.99	6.18	5	>sp|Q16769|QPCT_HUMAN Glutaminyl-peptide cyclotransferase OS=Homo sapiens OX=9606 GN=QPCT PE=1 SV=1	12985	20210911_zy_urine_ethcd_1.8269.8269.3	controllerType=0 controllerNumber=1 scan=8269	37.0189
15139:3	33	K.SVVAPATDGGLN[+2715.963]LTSTFLR.K	HexNAc(5)Hex(6)Fuc(1)NeuAc(2)	N[+2716]	1545.33	3	4633.98	4634.99	-1	-0.6	67	Specific	351.91	240.2	240.2	6.08	11	>sp|P41222|PTGDS_HUMAN Prostaglandin-H2 D-isomerase OS=Homo sapiens OX=9606 GN=PTGDS PE=1 SV=1	16974	20210911_zy_urine_ethcd_1.16597.16597.3	controllerType=0 controllerNumber=1 scan=16597	73.9769
14221:3	1	R.FALLM[+15.995]TNC[+57.021]YATPSSN[+2350.830]ATDPLK.Y	HexNAc(4)Hex(5)Fuc(1)NeuAc(2)	C[+57], M[+16], N[+2351]	1561.31	3	4681.92	4681.93	0	-1.8	499	Specific	352.64	244.19	244.19	7.09	49	>sp|P07911|UROM_HUMAN Uromodulin OS=Homo sapiens OX=9606 GN=UMOD PE=1 SV=1	16609	20210911_zy_urine_ethcd_1.15593.15593.3	controllerType=0 controllerNumber=1 scan=15593	69.5629
14680:3	2	R.QDQC[+57.021]IYN[+2861.000]TTYLNVQR.E	HexNAc(5)Hex(6)NeuAc(3)	C[+57], N[+2861]	1592.97	3	4776.88	4776.9	0	-2.9	87	Specific	352.74	190.48	190.48	6.75	53	>sp|P02763|A1AG1_HUMAN Alpha-1-acid glycoprotein 1 OS=Homo sapiens OX=9606 GN=ORM1 PE=1 SV=1	2208	20210911_zy_urine_ethcd_1.16094.16094.3	controllerType=0 controllerNumber=1 scan=16094	71.7665
04141:3	8	R.FGC[+57.021]EIENN[+2861.000]R.S	HexNAc(5)Hex(6)NeuAc(3)	C[+57], N[+2861]	1333.83	3	3999.49	3999.49	0	-1.4	121	Specific	353.07	193.47	193.47	5.95	33	>sp|P25311|ZA2G_HUMAN Zinc-alpha-2-glycoprotein OS=Homo sapiens OX=9606 GN=AZGP1 PE=1 SV=2	18783	20210911_zy_urine_ethcd_1.4550.4550.3	controllerType=0 controllerNumber=1 scan=4550	20.3601
01237:3	22	R.EGN[+2627.947]ATGHLVGR.Y	HexNAc(6)Hex(6)Fuc(1)NeuAc(1)	N[+2628]	1246.84	3	3738.5	3738.51	0	-2.1	1800	Specific	353.31	127.37	127.37	5.59	16	>sp|O60494|CUBN_HUMAN Cubilin OS=Homo sapiens OX=9606 GN=CUBN PE=1 SV=5	6499	20210911_zy_urine_ethcd_1.1365.1365.3	controllerType=0 controllerNumber=1 scan=1365	6.3523
05944:3	12	R.ITYSIVQTN[+2391.857]C[+57.021]SK.E	HexNAc(5)Hex(4)Fuc(1)NeuAc(2)	C[+57], N[+2392]	1269.19	3	3805.55	3805.56	0	-2.7	197	Specific	353.34	219.45	219.45	5.75	26	>sp|P01042|KNG1_HUMAN Kininogen-1 OS=Homo sapiens OX=9606 GN=KNG1 PE=1 SV=2	6533	20210911_zy_urine_ethcd_1.6528.6528.3	controllerType=0 controllerNumber=1 scan=6528	29.2749
03635:3	13	K.WN[+1913.677]NTGC[+57.021]QALPSQDEGPSK.A	HexNAc(4)Hex(5)NeuAc(1)	C[+57], N[+1914]	1301.52	3	3902.55	3902.55	0	-1.5	498	Specific	353.51	218.39	218.39	6.66	16	>sp|P01833|PIGR_HUMAN Polymeric immunoglobulin receptor OS=Homo sapiens OX=9606 GN=PIGR PE=1 SV=4	10083	20210911_zy_urine_ethcd_1.3994.3994.3	controllerType=0 controllerNumber=1 scan=3994	17.84
01399:3	89	R.N[+1864.634]STGAYC[+57.021]GMGENK.D	HexNAc(2)Hex(9)	C[+57], N[+1865]	1085.07	3	3253.18	3253.19	0	-2.5	69	Specific	353.87	247.78	247.78	4.61	1	>sp|Q53GD3|CTL4_HUMAN Choline transporter-like protein 4 OS=Homo sapiens OX=9606 GN=SLC44A4 PE=1 SV=2	1077	20210911_zy_urine_ethcd_1.1543.1543.3	controllerType=0 controllerNumber=1 scan=1543	7.163
12391:4	4	R.QNQC[+57.021]FYN[+3226.132]SSYLNVQR.E	HexNAc(6)Hex(7)NeuAc(3)	C[+57], N[+3226]	1287.25	4	5145.98	5147	-1	-2.9	87	Specific	353.88	223.44	223.44	7	34	>sp|P19652|A1AG2_HUMAN Alpha-1-acid glycoprotein 2 OS=Homo sapiens OX=9606 GN=ORM2 PE=1 SV=2	4531	20210911_zy_urine_ethcd_1.13592.13592.4	controllerType=0 controllerNumber=1 scan=13592	60.7842
12546:3	9	K.C[+57.021]GLVPVLAENYN[+2569.905]K.S	HexNAc(5)Hex(6)NeuAc(2)	C[+57], N[+2570]	1349.55	3	4046.65	4046.66	0	-2.1	421	Specific	354.55	232.77	232.77	6.13	20	>sp|P02787|TRFE_HUMAN Serotransferrin OS=Homo sapiens OX=9606 GN=TF PE=1 SV=3	18223	20210911_zy_urine_ethcd_1.13762.13762.3	controllerType=0 controllerNumber=1 scan=13762	61.5339
14197:3	19	K.VVLHPN[+2861.000]YSQVDIGLIK.L	HexNAc(5)Hex(6)NeuAc(3)	N[+2861]	1552.67	3	4656.01	4656.01	0	-1.3	236	Specific	354.85	219.19	219.19	6.34	20	>sp|P00738|HPT_HUMAN Haptoglobin OS=Homo sapiens OX=9606 GN=HP PE=1 SV=1	3044	20210911_zy_urine_ethcd_1.15566.15566.3	controllerType=0 controllerNumber=1 scan=15566	69.4439
06227:3	59	K.NN[+2204.772]ATVHEQVGGPSLTSDLQAQSK.G	HexNAc(4)Hex(5)NeuAc(2)	N[+2205]	1528.98	3	4584.93	4585.94	-1	-1.8	85	Specific	354.97	209.36	209.36	6.45	4	>sp|P04004|VTNC_HUMAN Vitronectin OS=Homo sapiens OX=9606 GN=VTN PE=1 SV=1	17960	20210911_zy_urine_ethcd_1.6838.6838.3	controllerType=0 controllerNumber=1 scan=6838	30.6654
05811:3	26	R.N[+2350.830]HSC[+57.021]SEGQISIFR.Y	HexNAc(4)Hex(5)Fuc(1)NeuAc(2)	C[+57], N[+2351]	1295.85	3	3885.53	3885.54	0	-2.3	731	Specific	355.22	161.55	161.55	6.11	11	>sp|O75882|ATRN_HUMAN Attractin OS=Homo sapiens OX=9606 GN=ATRN PE=1 SV=2	8160	20210911_zy_urine_ethcd_1.6382.6382.3	controllerType=0 controllerNumber=1 scan=6382	28.616
10193:3	27	R.N[+1378.476]ETQHEPYPLMLPGC[+57.021]SPSC[+57.021]PLER.F	HexNAc(2)Hex(6)	C[+57]*2, N[+1378]	1364.23	3	4090.69	4090.7	0	-2.1	333	Specific	355.48	254.1	149.95	7.6	13	>sp|P15309|PPAP_HUMAN Prostatic acid phosphatase OS=Homo sapiens OX=9606 GN=ACPP PE=1 SV=3	14195	20210911_zy_urine_ethcd_1.11185.11185.3	controllerType=0 controllerNumber=1 scan=11185	50.0412
01155:3	18	K.KKEDALN[+2204.772]ETR.E	HexNAc(4)Hex(5)NeuAc(2)	N[+2205]	1136.8	3	3408.4	3408.41	0	-2.3	80	Specific	355.66	152.59	152.59	4.81	18	>sp|P10909|CLUS_HUMAN Clusterin OS=Homo sapiens OX=9606 GN=CLU PE=1 SV=1	6125	20210911_zy_urine_ethcd_1.1275.1275.3	controllerType=0 controllerNumber=1 scan=1275	5.9326
03019:3	8	R.FGC[+57.021]EIENN[+2350.830]R.S	HexNAc(4)Hex(5)Fuc(1)NeuAc(2)	C[+57], N[+2351]	1163.78	3	3489.32	3489.32	0	-2.4	121	Specific	356.07	171.47	171.47	5.93	33	>sp|P25311|ZA2G_HUMAN Zinc-alpha-2-glycoprotein OS=Homo sapiens OX=9606 GN=AZGP1 PE=1 SV=2	18783	20210911_zy_urine_ethcd_1.3316.3316.3	controllerType=0 controllerNumber=1 scan=3316	14.762
02105:3	42	R.YHGFLN[+1444.534]TSYHR.Q	HexNAc(4)Hex(3)Fuc(1)	N[+1445]	947.067	3	2839.19	2839.19	0	-2.2	87	Specific	356.69	174.78	174.78	5.48	4	>sp|P11117|PPAL_HUMAN Lysosomal acid phosphatase OS=Homo sapiens OX=9606 GN=ACP2 PE=1 SV=3	11545	20210911_zy_urine_ethcd_1.2314.2314.3	controllerType=0 controllerNumber=1 scan=2314	10.4092
13450:3	19	K.VVLHPN[+2350.830]YSQVDIGLIK.L	HexNAc(4)Hex(5)Fuc(1)NeuAc(2)	N[+2351]	1382.62	3	4145.84	4145.84	0	-1.6	236	Specific	357.18	229.82	229.82	6.35	20	>sp|P00738|HPT_HUMAN Haptoglobin OS=Homo sapiens OX=9606 GN=HP PE=1 SV=1	3044	20210911_zy_urine_ethcd_1.14750.14750.3	controllerType=0 controllerNumber=1 scan=14750	65.8849
13555:3	4	R.QNQC[+57.021]FYN[+2553.910]SSYLNVQR.E	HexNAc(5)Hex(5)Fuc(1)NeuAc(2)	C[+57], N[+2554]	1491.92	3	4473.75	4474.78	-1	-5.2	87	Specific	357.21	197.85	197.85	6.61	34	>sp|P19652|A1AG2_HUMAN Alpha-1-acid glycoprotein 2 OS=Homo sapiens OX=9606 GN=ORM2 PE=1 SV=2	4531	20210911_zy_urine_ethcd_1.14865.14865.3	controllerType=0 controllerNumber=1 scan=14865	66.3941
14703:3	9	R.QQQHLFGSN[+3007.058]VTDC[+57.021]SGNFC[+57.021]LFR.S	HexNAc(5)Hex(6)Fuc(1)NeuAc(3)	C[+57]*2, N[+3007]	1841.39	3	5522.17	5522.18	0	-2.8	622	Specific	357.51	248.6	248.6	7.22	20	>sp|P02787|TRFE_HUMAN Serotransferrin OS=Homo sapiens OX=9606 GN=TF PE=1 SV=3	18223	20210911_zy_urine_ethcd_1.16120.16120.3	controllerType=0 controllerNumber=1 scan=16120	71.8771
12843:3	2	R.QDQC[+57.021]IYN[+2878.015]TTYLNVQR.E	HexNAc(5)Hex(7)Fuc(1)NeuAc(2)	C[+57], N[+2878]	1598.64	3	4793.92	4793.91	0	0.9	87	Specific	357.69	237.75	237.75	6	53	>sp|P02763|A1AG1_HUMAN Alpha-1-acid glycoprotein 1 OS=Homo sapiens OX=9606 GN=ORM1 PE=1 SV=1	2208	20210911_zy_urine_ethcd_1.14087.14087.3	controllerType=0 controllerNumber=1 scan=14087	62.9661
11971:3	7	R.ADGTVNQIEGEATPVN[+2204.772]LTEPAK.L	HexNAc(4)Hex(5)NeuAc(2)	N[+2205]	1486.97	3	4458.88	4458.89	0	-1.9	83	Specific	358.36	251.27	251.27	7.27	25	>sp|P05090|APOD_HUMAN Apolipoprotein D OS=Homo sapiens OX=9606 GN=APOD PE=1 SV=1	120	20210911_zy_urine_ethcd_1.13133.13133.3	controllerType=0 controllerNumber=1 scan=13133	58.7568
01181:3	15	K.N[+2262.814]NSDISSTR.G	HexNAc(5)Hex(5)Fuc(1)NeuAc(1)	N[+2263]	1086.09	3	3256.27	3256.27	0	-2.2	46	Specific	358.84	149.62	149.62	6.08	12	>sp|P01871|IGHM_HUMAN Immunoglobulin heavy constant mu OS=Homo sapiens OX=9606 GN=IGHM PE=1 SV=4	10127	20210911_zy_urine_ethcd_1.1304.1304.3	controllerType=0 controllerNumber=1 scan=1304	6.0685
04061:3	8	R.FGC[+57.021]EIENN[+2861.000]R.S	HexNAc(5)Hex(6)NeuAc(3)	C[+57], N[+2861]	1333.83	3	3999.49	3999.49	0	-1.8	121	Specific	359.71	195.77	195.77	6.14	33	>sp|P25311|ZA2G_HUMAN Zinc-alpha-2-glycoprotein OS=Homo sapiens OX=9606 GN=AZGP1 PE=1 SV=2	18783	20210911_zy_urine_ethcd_1.4462.4462.3	controllerType=0 controllerNumber=1 scan=4462	19.9611
10097:3	27	R.N[+1540.529]ETQHEPYPLMLPGC[+57.021]SPSC[+57.021]PLER.F	HexNAc(2)Hex(7)	C[+57]*2, N[+1541]	1418.25	3	4252.74	4252.75	0	-2.1	333	Specific	360.69	253.92	253.92	7.67	13	>sp|P15309|PPAP_HUMAN Prostatic acid phosphatase OS=Homo sapiens OX=9606 GN=ACPP PE=1 SV=3	14195	20210911_zy_urine_ethcd_1.11080.11080.3	controllerType=0 controllerNumber=1 scan=11080	49.5782
09872:3	7	R.ADGTVNQIEGEATPVN[+2424.867]LTEPAK.L	HexNAc(5)Hex(6)Fuc(1)NeuAc(1)	N[+2425]	1560.67	3	4679.98	4678.99	1	-1.5	83	Specific	362.32	265.86	265.86	7.14	25	>sp|P05090|APOD_HUMAN Apolipoprotein D OS=Homo sapiens OX=9606 GN=APOD PE=1 SV=1	120	20210911_zy_urine_ethcd_1.10833.10833.3	controllerType=0 controllerNumber=1 scan=10833	48.4819
12664:3	2	R.QDQC[+57.021]IYN[+3226.132]TTYLNVQR.E	HexNAc(6)Hex(7)NeuAc(3)	C[+57], N[+3226]	1714.36	3	5141.05	5142.03	-1	5.4	87	Specific	362.54	222.09	222.09	5.81	53	>sp|P02763|A1AG1_HUMAN Alpha-1-acid glycoprotein 1 OS=Homo sapiens OX=9606 GN=ORM1 PE=1 SV=1	2208	20210911_zy_urine_ethcd_1.13891.13891.3	controllerType=0 controllerNumber=1 scan=13891	62.0957
02232:3	8	R.FGC[+57.021]EIENN[+2059.735]R.S	HexNAc(4)Hex(5)Fuc(1)NeuAc(1)	C[+57], N[+2060]	1066.75	3	3198.22	3198.23	0	-2	121	Specific	362.6	196.98	196.98	6.2	33	>sp|P25311|ZA2G_HUMAN Zinc-alpha-2-glycoprotein OS=Homo sapiens OX=9606 GN=AZGP1 PE=1 SV=2	18783	20210911_zy_urine_ethcd_1.2453.2453.3	controllerType=0 controllerNumber=1 scan=2453	11.0058
05674:3	92	R.C[+57.021]FLGN[+2204.772]GTGYR.G	HexNAc(4)Hex(5)NeuAc(2)	C[+57], N[+2205]	1117.1	3	3349.29	3349.29	0	-1.9	286	Specific	362.6	204.07	204.07	4	2	>sp|Q04756|HGFA_HUMAN Hepatocyte growth factor activator OS=Homo sapiens OX=9606 GN=HGFAC PE=1 SV=1	4501	20210911_zy_urine_ethcd_1.6232.6232.3	controllerType=0 controllerNumber=1 scan=6232	27.9404
10214:3	9	K.C[+57.021]GLVPVLAENYN[+1913.677]K.S	HexNAc(4)Hex(5)NeuAc(1)	C[+57], N[+1914]	1130.81	3	3390.42	3390.43	0	-3.8	421	Specific	363.29	216.72	216.72	6.06	20	>sp|P02787|TRFE_HUMAN Serotransferrin OS=Homo sapiens OX=9606 GN=TF PE=1 SV=3	18223	20210911_zy_urine_ethcd_1.11208.11208.3	controllerType=0 controllerNumber=1 scan=11208	50.144
09175:3	24	R.ALGFEN[+2772.984]ATQALGR.A	HexNAc(6)Hex(6)NeuAc(2)	N[+2773]	1374.57	3	4121.7	4120.69	1	1.5	64	Specific	363.47	184.56	184.56	5.2	11	>sp|Q08380|LG3BP_HUMAN Galectin-3-binding protein OS=Homo sapiens OX=9606 GN=LGALS3BP PE=1 SV=1	4876	20210911_zy_urine_ethcd_1.10070.10070.3	controllerType=0 controllerNumber=1 scan=10070	45.0578
04930:3	37	R.GHTLTLN[+1872.651]FTR.N	HexNAc(3)Hex(6)NeuAc(1)	N[+1873]	1011.43	3	3032.27	3032.27	0	-1.9	97	Specific	364	171.34	171.34	5.62	13	>sp|P11279|LAMP1_HUMAN Lysosome-associated membrane glycoprotein 1 OS=Homo sapiens OX=9606 GN=LAMP1 PE=1 SV=3	4405	20210911_zy_urine_ethcd_1.5416.5416.3	controllerType=0 controllerNumber=1 scan=5416	24.2804
02991:3	8	R.FGC[+57.021]EIENN[+2350.830]R.S	HexNAc(4)Hex(5)Fuc(1)NeuAc(2)	C[+57], N[+2351]	1163.78	3	3489.32	3489.32	0	-2.6	121	Specific	364.25	183.91	183.91	6.07	33	>sp|P25311|ZA2G_HUMAN Zinc-alpha-2-glycoprotein OS=Homo sapiens OX=9606 GN=AZGP1 PE=1 SV=2	18783	20210911_zy_urine_ethcd_1.3286.3286.3	controllerType=0 controllerNumber=1 scan=3286	14.6504
02416:3	10	R.EEQFN[+1606.587]STFR.V	HexNAc(4)Hex(4)Fuc(1)	N[+1607]	922.039	3	2764.1	2764.11	0	-2.6	172	Specific	364.35	170.34	170.34	5.99	27	>sp|P01859|IGHG2_HUMAN Immunoglobulin heavy constant gamma 2 OS=Homo sapiens OX=9606 GN=IGHG2 PE=1 SV=2	2858	20210911_zy_urine_ethcd_1.2654.2654.3	controllerType=0 controllerNumber=1 scan=2654	11.8768
01318:2	2	R.NEEYN[+2204.772]K.S	HexNAc(4)Hex(5)NeuAc(2)	N[+2205]	1501.06	2	3001.12	3001.12	0	-1.5	52	Specific	364.97	89.08	89.08	4.97	53	>sp|P02763|A1AG1_HUMAN Alpha-1-acid glycoprotein 1 OS=Homo sapiens OX=9606 GN=ORM1 PE=1 SV=1	2208	20210911_zy_urine_ethcd_1.1454.1454.2	controllerType=0 controllerNumber=1 scan=1454	6.7628
02493:3	10	R.EEQFN[+1809.666]STFR.V	HexNAc(5)Hex(4)Fuc(1)	N[+1810]	989.732	3	2967.18	2967.19	0	-2.5	172	Specific	365.6	168.09	168.09	5.99	27	>sp|P01859|IGHG2_HUMAN Immunoglobulin heavy constant gamma 2 OS=Homo sapiens OX=9606 GN=IGHG2 PE=1 SV=2	2858	20210911_zy_urine_ethcd_1.2739.2739.3	controllerType=0 controllerNumber=1 scan=2739	12.2269
01829:3	2	R.NEEYN[+3007.058]K.S	HexNAc(5)Hex(6)Fuc(1)NeuAc(3)	N[+3007]	1268.47	3	3803.4	3803.41	0	-2.1	52	Specific	366.02	120.29	120.29	5.06	53	>sp|P02763|A1AG1_HUMAN Alpha-1-acid glycoprotein 1 OS=Homo sapiens OX=9606 GN=ORM1 PE=1 SV=1	2208	20210911_zy_urine_ethcd_1.2013.2013.2	controllerType=0 controllerNumber=1 scan=2013	9.183
14718:3	2	R.QDQC[+57.021]IYN[+3007.058]TTYLNVQR.E	HexNAc(5)Hex(6)Fuc(1)NeuAc(3)	C[+57], N[+3007]	1641.32	3	4921.95	4922.95	-1	-1.2	87	Specific	366.29	207.96	207.96	6.96	53	>sp|P02763|A1AG1_HUMAN Alpha-1-acid glycoprotein 1 OS=Homo sapiens OX=9606 GN=ORM1 PE=1 SV=1	2208	20210911_zy_urine_ethcd_1.16136.16136.3	controllerType=0 controllerNumber=1 scan=16136	71.9481
13853:4	2	R.QDQC[+57.021]IYN[+4028.418]TTYLNVQR.E	HexNAc(7)Hex(8)Fuc(1)NeuAc(4)	C[+57], N[+4028]	1487.08	4	5945.31	5944.31	1	-1.5	87	Specific	366.29	239.61	239.61	7.09	53	>sp|P02763|A1AG1_HUMAN Alpha-1-acid glycoprotein 1 OS=Homo sapiens OX=9606 GN=ORM1 PE=1 SV=1	2208	20210911_zy_urine_ethcd_1.15191.15191.4	controllerType=0 controllerNumber=1 scan=15191	67.8216
01185:3	20	K.PREEQYN[+1606.587]STYR.V	HexNAc(4)Hex(4)Fuc(1)	N[+1607]	1017.09	3	3049.25	3049.25	0	-2.4	293	Specific	367.17	134.52	134.52	4.96	13	>sp|P0DOX5|IGG1_HUMAN Immunoglobulin gamma-1 heavy chain OS=Homo sapiens OX=9606 PE=1 SV=2	10252	20210911_zy_urine_ethcd_1.1308.1308.3	controllerType=0 controllerNumber=1 scan=1308	6.0877
09269:4	7	R.ADGTVNQIEGEATPVN[+3155.132]LTEPAK.L	HexNAc(7)Hex(8)Fuc(1)NeuAc(1)	N[+3155]	1352.82	4	5408.24	5409.25	-1	-1.8	83	Specific	367.63	317.25	317.25	7.92	25	>sp|P05090|APOD_HUMAN Apolipoprotein D OS=Homo sapiens OX=9606 GN=APOD PE=1 SV=1	120	20210911_zy_urine_ethcd_1.10172.10172.4	controllerType=0 controllerNumber=1 scan=10172	45.5176
12626:3	9	K.C[+57.021]GLVPVLAENYN[+2569.905]K.S	HexNAc(5)Hex(6)NeuAc(2)	C[+57], N[+2570]	1349.56	3	4046.65	4046.66	0	-1.3	421	Specific	367.85	231.1	231.1	6.01	20	>sp|P02787|TRFE_HUMAN Serotransferrin OS=Homo sapiens OX=9606 GN=TF PE=1 SV=3	18223	20210911_zy_urine_ethcd_1.13849.13849.3	controllerType=0 controllerNumber=1 scan=13849	61.9085
12993:4	2	R.QDQC[+57.021]IYN[+2861.000]TTYLNVQR.E	HexNAc(5)Hex(6)NeuAc(3)	C[+57], N[+2861]	1194.98	4	4776.89	4776.9	0	-1	87	Specific	368.05	258.31	258.31	6.83	53	>sp|P02763|A1AG1_HUMAN Alpha-1-acid glycoprotein 1 OS=Homo sapiens OX=9606 GN=ORM1 PE=1 SV=1	2208	20210911_zy_urine_ethcd_1.14251.14251.4	controllerType=0 controllerNumber=1 scan=14251	63.6962
02132:3	6	K.HYTN[+2116.756]SSQDVTVPC[+57.021]R.V	HexNAc(5)Hex(5)NeuAc(1)	C[+57], N[+2117]	1260.84	3	3780.49	3780.51	0	-3	89	Specific	368.08	140.05	140.05	5.82	32	>sp|P01877|IGHA2_HUMAN Immunoglobulin heavy constant alpha 2 OS=Homo sapiens OX=9606 GN=IGHA2 PE=1 SV=4	10403	20210911_zy_urine_ethcd_1.2344.2344.3	controllerType=0 controllerNumber=1 scan=2344	10.5419
03411:3	32	R.SLHVPGLN[+2059.735]K.T	HexNAc(4)Hex(5)Fuc(1)NeuAc(1)	N[+2060]	1008.77	3	3024.28	3024.29	0	-2.9	191	Specific	369.11	119.94	119.94	5.91	7	>sp|P30530|UFO_HUMAN Tyrosine-protein kinase receptor UFO OS=Homo sapiens OX=9606 GN=AXL PE=1 SV=4	18964	20210911_zy_urine_ethcd_1.3748.3748.3	controllerType=0 controllerNumber=1 scan=3748	16.7227
14245:4	2	R.QDQC[+57.021]IYN[+3517.228]TTYLNVQR.E	HexNAc(6)Hex(7)NeuAc(4)	C[+57], N[+3517]	1358.79	4	5432.12	5433.12	-1	-0.4	87	Specific	370.41	201.77	201.77	7.03	53	>sp|P02763|A1AG1_HUMAN Alpha-1-acid glycoprotein 1 OS=Homo sapiens OX=9606 GN=ORM1 PE=1 SV=1	2208	20210911_zy_urine_ethcd_1.15619.15619.4	controllerType=0 controllerNumber=1 scan=15619	69.6762
03085:3	8	R.FGC[+57.021]EIENN[+2350.830]R.S	HexNAc(4)Hex(5)Fuc(1)NeuAc(2)	C[+57], N[+2351]	1163.78	3	3489.32	3489.32	0	-2.2	121	Specific	370.83	181.12	181.12	6.2	33	>sp|P25311|ZA2G_HUMAN Zinc-alpha-2-glycoprotein OS=Homo sapiens OX=9606 GN=AZGP1 PE=1 SV=2	18783	20210911_zy_urine_ethcd_1.3389.3389.3	controllerType=0 controllerNumber=1 scan=3389	15.0875
02983:2	6	K.TPLTAN[+1241.454]ITK.S	HexNAc(3)Hex(3)Fuc(1)	N[+1241]	1100.51	2	2200.01	2200.01	0	0.6	200	Specific	372.47	189.32	189.32	5.33	32	>sp|P01877|IGHA2_HUMAN Immunoglobulin heavy constant alpha 2 OS=Homo sapiens OX=9606 GN=IGHA2 PE=1 SV=4	10403	20210911_zy_urine_ethcd_1.3277.3277.2	controllerType=0 controllerNumber=1 scan=3277	14.6147
03383:3	37	R.GHTLTLN[+1784.634]FTR.N	HexNAc(4)Hex(6)	N[+1785]	982.087	3	2944.25	2944.26	0	-3	97	Specific	372.58	174.16	174.16	5.25	13	>sp|P11279|LAMP1_HUMAN Lysosome-associated membrane glycoprotein 1 OS=Homo sapiens OX=9606 GN=LAMP1 PE=1 SV=3	4405	20210911_zy_urine_ethcd_1.3717.3717.3	controllerType=0 controllerNumber=1 scan=3717	16.5838
05675:3	8	K.DIVEYYNDSN[+2116.756]GSHVLQGR.F	HexNAc(5)Hex(5)NeuAc(1)	N[+2117]	1395.25	3	4183.73	4182.71	1	2.8	103	Specific	373.06	230.46	58.25	5.83	33	>sp|P25311|ZA2G_HUMAN Zinc-alpha-2-glycoprotein OS=Homo sapiens OX=9606 GN=AZGP1 PE=1 SV=2	18783	20210911_zy_urine_ethcd_1.6233.6233.3	controllerType=0 controllerNumber=1 scan=6233	27.9457
03935:3	23	R.LHEITN[+2715.963]ETFR.G	HexNAc(5)Hex(6)Fuc(1)NeuAc(2)	N[+2716]	1325.87	3	3975.59	3975.6	0	-2.3	112	Specific	373.46	184.52	184.52	5.7	11	>sp|Q6EMK4|VASN_HUMAN Vasorin OS=Homo sapiens OX=9606 GN=VASN PE=1 SV=1	18175	20210911_zy_urine_ethcd_1.4323.4323.3	controllerType=0 controllerNumber=1 scan=4323	19.3302
09857:4	4	R.QNQC[+57.021]FYN[+3226.132]SSYLNVQR.E	HexNAc(6)Hex(7)NeuAc(3)	C[+57], N[+3226]	1287.51	4	5147.01	5147	0	1.4	87	Specific	373.57	261.68	261.68	6.31	34	>sp|P19652|A1AG2_HUMAN Alpha-1-acid glycoprotein 2 OS=Homo sapiens OX=9606 GN=ORM2 PE=1 SV=2	4531	20210911_zy_urine_ethcd_1.10817.10817.4	controllerType=0 controllerNumber=1 scan=10817	48.4116
14286:3	29	K.ALPQPQN[+2204.772]VTSLLGC[+57.021]TH.-	HexNAc(4)Hex(5)NeuAc(2)	C[+57], N[+2205]	1314.22	3	3940.64	3940.65	0	-1.8	447	CRagged	374.77	260.21	260.21	6.47	8	>sp|P02790|HEMO_HUMAN Hemopexin OS=Homo sapiens OX=9606 GN=HPX PE=1 SV=2	9336	20210911_zy_urine_ethcd_1.15664.15664.3	controllerType=0 controllerNumber=1 scan=15664	69.87
13231:3	70	K.VC[+57.021]QDC[+57.021]PLLAPLN[+2204.772]DTR.V	HexNAc(4)Hex(5)NeuAc(2)	C[+57]*2, N[+2205]	1326.21	3	3976.61	3976.62	0	-1.4	145	Specific	375.63	237.19	237.19	5.45	1	>sp|P02765|FETUA_HUMAN Alpha-2-HS-glycoprotein OS=Homo sapiens OX=9606 GN=AHSG PE=1 SV=2	4627	20210911_zy_urine_ethcd_1.14511.14511.3	controllerType=0 controllerNumber=1 scan=14511	64.8419
14587:3	33	K.SVVAPATDGGLN[+2059.735]LTSTFLR.K	HexNAc(4)Hex(5)Fuc(1)NeuAc(1)	N[+2060]	1326.93	3	3978.77	3978.76	0	2	67	Specific	376.03	258.01	258.01	5.31	11	>sp|P41222|PTGDS_HUMAN Prostaglandin-H2 D-isomerase OS=Homo sapiens OX=9606 GN=PTGDS PE=1 SV=1	16974	20210911_zy_urine_ethcd_1.15993.15993.3	controllerType=0 controllerNumber=1 scan=15993	71.3156
07831:3	4	R.QNQC[+57.021]FYN[+2643.941]SSYLNVQR.E	HexNAc(6)Hex(7)NeuAc(1)	C[+57], N[+2644]	1522.27	3	4564.8	4564.81	0	-1.5	87	Specific	376.08	238.69	238.69	6.8	34	>sp|P19652|A1AG2_HUMAN Alpha-1-acid glycoprotein 2 OS=Homo sapiens OX=9606 GN=ORM2 PE=1 SV=2	4531	20210911_zy_urine_ethcd_1.8598.8598.3	controllerType=0 controllerNumber=1 scan=8598	38.4989
12528:3	9	K.C[+57.021]GLVPVLAENYN[+2204.772]K.S	HexNAc(4)Hex(5)NeuAc(2)	C[+57], N[+2205]	1227.84	3	3681.52	3681.52	0	-1.8	421	Specific	376.49	223.68	223.68	6.19	20	>sp|P02787|TRFE_HUMAN Serotransferrin OS=Homo sapiens OX=9606 GN=TF PE=1 SV=3	18223	20210911_zy_urine_ethcd_1.13742.13742.3	controllerType=0 controllerNumber=1 scan=13742	61.4451
10765:3	18	R.LAN[+2391.857]LTQGEDQYYLR.V	HexNAc(5)Hex(4)Fuc(1)NeuAc(2)	N[+2392]	1359.23	3	4075.69	4075.69	0	-1.1	372	Specific	376.49	228.04	228.04	6.01	18	>sp|P10909|CLUS_HUMAN Clusterin OS=Homo sapiens OX=9606 GN=CLU PE=1 SV=1	6125	20210911_zy_urine_ethcd_1.11811.11811.3	controllerType=0 controllerNumber=1 scan=11811	52.8107
11777:3	19	K.VVLHPN[+1913.677]YSQVDIGLIK.L	HexNAc(4)Hex(5)NeuAc(1)	N[+1914]	1236.9	3	3708.68	3708.69	0	-2	236	Specific	377.51	218.26	218.26	6.59	20	>sp|P00738|HPT_HUMAN Haptoglobin OS=Homo sapiens OX=9606 GN=HP PE=1 SV=1	3044	20210911_zy_urine_ethcd_1.12920.12920.3	controllerType=0 controllerNumber=1 scan=12920	57.7905
03953:4	11	R.SRYPHKPEIN[+1913.677]STTHPGADLQENFC[+57.021]R.N	HexNAc(4)Hex(5)NeuAc(1)	C[+57], N[+1914]	1217.77	4	4868.07	4868.07	0	-1.6	134	Specific	377.56	292.64	292.64	6.39	13	>sp|P00734|THRB_HUMAN Prothrombin OS=Homo sapiens OX=9606 GN=F2 PE=1 SV=2	18404	20210911_zy_urine_ethcd_1.4343.4343.4	controllerType=0 controllerNumber=1 scan=4343	19.4203
12736:3	9	K.C[+57.021]GLVPVLAENYN[+2350.830]K.S	HexNAc(4)Hex(5)Fuc(1)NeuAc(2)	C[+57], N[+2351]	1276.53	3	3827.57	3827.58	0	-1.8	421	Specific	377.93	253.05	253.05	6.15	20	>sp|P02787|TRFE_HUMAN Serotransferrin OS=Homo sapiens OX=9606 GN=TF PE=1 SV=3	18223	20210911_zy_urine_ethcd_1.13970.13970.3	controllerType=0 controllerNumber=1 scan=13970	62.4494
08067:3	12	R.ITYSIVQTN[+3007.058]C[+57.021]SK.E	HexNAc(5)Hex(6)Fuc(1)NeuAc(3)	C[+57], N[+3007]	1474.26	3	4420.76	4420.76	0	-1	197	Specific	379.64	228.47	228.47	5.55	26	>sp|P01042|KNG1_HUMAN Kininogen-1 OS=Homo sapiens OX=9606 GN=KNG1 PE=1 SV=2	6533	20210911_zy_urine_ethcd_1.8856.8856.3	controllerType=0 controllerNumber=1 scan=8856	39.642
06933:3	3	K.EHEGAIYPDN[+3007.058]TTDFQR.A	HexNAc(5)Hex(6)Fuc(1)NeuAc(3)	N[+3007]	1633.97	3	4899.89	4899.9	0	-1.4	129	Specific	379.79	277.19	277.19	6.36	26	>sp|P00450|CERU_HUMAN Ceruloplasmin OS=Homo sapiens OX=9606 GN=CP PE=1 SV=1	460	20210911_zy_urine_ethcd_1.7614.7614.3	controllerType=0 controllerNumber=1 scan=7614	34.1075
09980:3	9	K.C[+57.021]GLVPVLAENYN[+1913.677]K.S	HexNAc(4)Hex(5)NeuAc(1)	C[+57], N[+1914]	1130.81	3	3390.42	3390.43	0	-2.5	421	Specific	380.52	241.45	241.45	6.06	20	>sp|P02787|TRFE_HUMAN Serotransferrin OS=Homo sapiens OX=9606 GN=TF PE=1 SV=3	18223	20210911_zy_urine_ethcd_1.10952.10952.3	controllerType=0 controllerNumber=1 scan=10952	49.0128
02309:3	39	R.YAEDKFN[+2204.772]ETTEK.S	HexNAc(4)Hex(5)NeuAc(2)	N[+2205]	1227.15	3	3679.43	3679.44	0	-2.6	396	Specific	381.11	183.32	183.32	5.34	7	>sp|P43652|AFAM_HUMAN Afamin OS=Homo sapiens OX=9606 GN=AFM PE=1 SV=1	20367	20210911_zy_urine_ethcd_1.2537.2537.3	controllerType=0 controllerNumber=1 scan=2537	11.3596
11786:3	7	R.ADGTVNQIEGEATPVN[+2715.963]LTEPAK.L	HexNAc(5)Hex(6)Fuc(1)NeuAc(2)	N[+2716]	1657.37	3	4970.08	4970.08	0	-0.3	83	Specific	382.62	272.99	272.99	6.58	25	>sp|P05090|APOD_HUMAN Apolipoprotein D OS=Homo sapiens OX=9606 GN=APOD PE=1 SV=1	120	20210911_zy_urine_ethcd_1.12930.12930.3	controllerType=0 controllerNumber=1 scan=12930	57.8337
02291:2	14	R.EEQFN[+1897.682]STYR.V	HexNAc(4)Hex(4)Fuc(1)NeuAc(1)	N[+1898]	1536.1	2	3071.19	3071.2	0	-1.8	173	Specific	383.24	158.51	158.51	6.27	17	>sp|P01861|IGHG4_HUMAN Immunoglobulin heavy constant gamma 4 OS=Homo sapiens OX=9606 GN=IGHG4 PE=1 SV=1	12793	20210911_zy_urine_ethcd_1.2517.2517.2	controllerType=0 controllerNumber=1 scan=2517	11.2698
13486:3	1	R.FALLM[+15.995]TNC[+57.021]YATPSSN[+2059.735]ATDPLK.Y	HexNAc(4)Hex(5)Fuc(1)NeuAc(1)	C[+57], M[+16], N[+2060]	1464.28	3	4390.84	4390.83	0	1	499	Specific	383.71	291.22	196.67	6.49	49	>sp|P07911|UROM_HUMAN Uromodulin OS=Homo sapiens OX=9606 GN=UMOD PE=1 SV=1	16609	20210911_zy_urine_ethcd_1.14790.14790.3	controllerType=0 controllerNumber=1 scan=14790	66.0613
02099:3	10	K.PREEQFN[+1647.613]STFR.V	HexNAc(5)Hex(3)Fuc(1)	N[+1648]	1020.1	3	3058.28	3058.29	0	-2.5	170	Specific	385.04	199.87	199.87	4.62	27	>sp|P01859|IGHG2_HUMAN Immunoglobulin heavy constant gamma 2 OS=Homo sapiens OX=9606 GN=IGHG2 PE=1 SV=2	2858	20210911_zy_urine_ethcd_1.2308.2308.3	controllerType=0 controllerNumber=1 scan=2308	10.3817
12734:3	9	K.C[+57.021]GLVPVLAENYN[+2350.830]K.S	HexNAc(4)Hex(5)Fuc(1)NeuAc(2)	C[+57], N[+2351]	1276.53	3	3827.57	3827.58	0	-3.7	421	Specific	385.29	238.64	238.64	6.11	20	>sp|P02787|TRFE_HUMAN Serotransferrin OS=Homo sapiens OX=9606 GN=TF PE=1 SV=3	18223	20210911_zy_urine_ethcd_1.13967.13967.3	controllerType=0 controllerNumber=1 scan=13967	62.4388
06802:3	56	R.LHNQLLPN[+2772.984]VTTVER.N	HexNAc(6)Hex(6)NeuAc(2)	N[+2773]	1469.97	3	4407.9	4406.89	1	2.4	504	Specific	385.9	169.19	169.19	5.18	5	>sp|P19440|GGT1_HUMAN Glutathione hydrolase 1 proenzyme OS=Homo sapiens OX=9606 GN=GGT1 PE=1 SV=2	20028	20210911_zy_urine_ethcd_1.7470.7470.3	controllerType=0 controllerNumber=1 scan=7470	33.4643
09378:3	22	R.C[+57.021]GSN[+1378.476]FTGPSGYIISPNYPK.Q	HexNAc(2)Hex(6)	C[+57], N[+1378]	1146.48	3	3437.43	3437.43	0	-2.3	2920	Specific	386.52	298.99	298.99	6.28	16	>sp|O60494|CUBN_HUMAN Cubilin OS=Homo sapiens OX=9606 GN=CUBN PE=1 SV=5	6499	20210911_zy_urine_ethcd_1.10292.10292.3	controllerType=0 controllerNumber=1 scan=10292	46.0487
05331:3	3	K.EHEGAIYPDN[+2715.963]TTDFQR.A	HexNAc(5)Hex(6)Fuc(1)NeuAc(2)	N[+2716]	1536.6	3	4607.79	4608.8	-1	-1.7	129	Specific	386.6	239.57	239.57	6.8	26	>sp|P00450|CERU_HUMAN Ceruloplasmin OS=Homo sapiens OX=9606 GN=CP PE=1 SV=1	460	20210911_zy_urine_ethcd_1.5856.5856.3	controllerType=0 controllerNumber=1 scan=5856	26.2579
05466:3	3	K.EHEGAIYPDN[+2204.772]TTDFQR.A	HexNAc(4)Hex(5)NeuAc(2)	N[+2205]	1366.54	3	4097.6	4097.61	0	-4	129	Specific	387	217.75	217.75	6.51	26	>sp|P00450|CERU_HUMAN Ceruloplasmin OS=Homo sapiens OX=9606 GN=CP PE=1 SV=1	460	20210911_zy_urine_ethcd_1.6004.6004.3	controllerType=0 controllerNumber=1 scan=6004	26.9156
02089:3	10	K.PREEQFN[+1809.666]STFR.V	HexNAc(5)Hex(4)Fuc(1)	N[+1810]	1074.12	3	3220.33	3220.34	0	-2.7	170	Specific	388.31	214.33	214.33	5.07	27	>sp|P01859|IGHG2_HUMAN Immunoglobulin heavy constant gamma 2 OS=Homo sapiens OX=9606 GN=IGHG2 PE=1 SV=2	2858	20210911_zy_urine_ethcd_1.2297.2297.3	controllerType=0 controllerNumber=1 scan=2297	10.3378
08628:3	16	K.TAVN[+2059.735]C[+57.021]SSDFDAC[+57.021]LITK.A	HexNAc(4)Hex(5)Fuc(1)NeuAc(1)	C[+57]*2, N[+2060]	1287.85	3	3861.54	3861.54	0	-0.4	40	Specific	388.4	255.01	255.01	5.74	11	>sp|P13987|CD59_HUMAN CD59 glycoprotein OS=Homo sapiens OX=9606 GN=CD59 PE=1 SV=1	1116	20210911_zy_urine_ethcd_1.9470.9470.3	controllerType=0 controllerNumber=1 scan=9470	42.3535
02730:3	24	K.AAIPSALDTN[+1971.719]SSK.S	HexNAc(5)Hex(5)Fuc(1)	N[+1972]	1082.79	3	3246.37	3246.38	0	-2.9	542	Specific	389.34	248.88	248.88	6.06	11	>sp|Q08380|LG3BP_HUMAN Galectin-3-binding protein OS=Homo sapiens OX=9606 GN=LGALS3BP PE=1 SV=1	4876	20210911_zy_urine_ethcd_1.3000.3000.3	controllerType=0 controllerNumber=1 scan=3000	13.3813
02516:3	21	K.SN[+3007.058]SSMHITDC[+57.021]R.L	HexNAc(5)Hex(6)Fuc(1)NeuAc(3)	C[+57], N[+3007]	1438.87	3	4314.6	4314.6	0	-0.3	103	Specific	389.82	206.74	206.74	5	25	>sp|P07998|RNAS1_HUMAN Ribonuclease pancreatic OS=Homo sapiens OX=9606 GN=RNASE1 PE=1 SV=4	14690	20210911_zy_urine_ethcd_1.2765.2765.3	controllerType=0 controllerNumber=1 scan=2765	12.334
12338:3	4	R.QNQC[+57.021]FYN[+2878.015]SSYLNVQR.E	HexNAc(5)Hex(7)Fuc(1)NeuAc(2)	C[+57], N[+2878]	1600.3	3	4798.88	4798.88	0	-0.3	87	Specific	390.41	218.96	218.96	6.24	34	>sp|P19652|A1AG2_HUMAN Alpha-1-acid glycoprotein 2 OS=Homo sapiens OX=9606 GN=ORM2 PE=1 SV=2	4531	20210911_zy_urine_ethcd_1.13534.13534.3	controllerType=0 controllerNumber=1 scan=13534	60.5302
09939:4	4	R.QNQC[+57.021]FYN[+3081.095]SSYLNVQR.E	HexNAc(6)Hex(7)Fuc(1)NeuAc(2)	C[+57], N[+3081]	1251.24	4	5001.96	5001.96	0	-0.9	87	Specific	390.77	230.13	230.13	6.92	34	>sp|P19652|A1AG2_HUMAN Alpha-1-acid glycoprotein 2 OS=Homo sapiens OX=9606 GN=ORM2 PE=1 SV=2	4531	20210911_zy_urine_ethcd_1.10907.10907.4	controllerType=0 controllerNumber=1 scan=10907	48.8116
09959:3	12	K.LNAENN[+2391.857]ATFYFK.I	HexNAc(5)Hex(4)Fuc(1)NeuAc(2)	N[+2392]	1275.18	3	3823.54	3823.55	0	-1.8	289	Specific	391.08	259.71	259.71	5.95	26	>sp|P01042|KNG1_HUMAN Kininogen-1 OS=Homo sapiens OX=9606 GN=KNG1 PE=1 SV=2	6533	20210911_zy_urine_ethcd_1.10929.10929.3	controllerType=0 controllerNumber=1 scan=10929	48.9106
11796:3	7	R.ADGTVNQIEGEATPVN[+2350.830]LTEPAK.L	HexNAc(4)Hex(5)Fuc(1)NeuAc(2)	N[+2351]	1535.65	3	4604.95	4604.95	0	-0.7	83	Specific	392.03	282.7	282.7	7	25	>sp|P05090|APOD_HUMAN Apolipoprotein D OS=Homo sapiens OX=9606 GN=APOD PE=1 SV=1	120	20210911_zy_urine_ethcd_1.12941.12941.3	controllerType=0 controllerNumber=1 scan=12941	57.8835
06609:3	60	K.GN[+1872.651]ETIVNLIHSTR.I	HexNAc(3)Hex(6)NeuAc(1)	N[+1873]	1109.48	3	3326.42	3326.43	0	-2.2	138	Specific	392.59	181.14	181.14	4.94	3	>sp|P16870|CBPE_HUMAN Carboxypeptidase E OS=Homo sapiens OX=9606 GN=CPE PE=1 SV=1	11256	20210911_zy_urine_ethcd_1.7257.7257.3	controllerType=0 controllerNumber=1 scan=7257	32.521
08182:3	7	R.ADGTVNQIEGEATPVN[+1768.640]LTEPAK.L	HexNAc(4)Hex(5)Fuc(1)	N[+1769]	1341.26	3	4021.76	4022.76	-1	0.2	83	Specific	394.66	286.52	286.52	6.61	25	>sp|P05090|APOD_HUMAN Apolipoprotein D OS=Homo sapiens OX=9606 GN=APOD PE=1 SV=1	120	20210911_zy_urine_ethcd_1.8982.8982.3	controllerType=0 controllerNumber=1 scan=8982	40.1981
05303:3	5	K.NC[+57.021]HHSGSQVPLIHC[+57.021]NLTTPSPQN[+552.217]ISNC[+57.021]R.Y	HexNAc(2)Fuc(1)	C[+57]*3, N[+552]	1260.9	3	3780.69	3780.7	0	-3.5	97	Specific	394.89	343.94	40.34	7.45	16	>sp|P10153|RNAS2_HUMAN Non-secretory ribonuclease OS=Homo sapiens OX=9606 GN=RNASE2 PE=1 SV=2	14694	20210911_zy_urine_ethcd_1.5825.5825.3	controllerType=0 controllerNumber=1 scan=5825	26.1194
04081:3	3	K.EHEGAIYPDN[+1913.677]TTDFQR.A	HexNAc(4)Hex(5)NeuAc(1)	N[+1914]	1269.51	3	3806.51	3806.52	0	-1.2	129	Specific	395.09	244.05	244.05	6.41	26	>sp|P00450|CERU_HUMAN Ceruloplasmin OS=Homo sapiens OX=9606 GN=CP PE=1 SV=1	460	20210911_zy_urine_ethcd_1.4484.4484.3	controllerType=0 controllerNumber=1 scan=4484	20.0607
07196:3	8	K.DIVEYYNDSN[+2553.910]GSHVLQGR.F	HexNAc(5)Hex(5)Fuc(1)NeuAc(2)	N[+2554]	1540.97	3	4620.88	4619.87	1	2.3	103	Specific	395.1	252.43	28.89	5.95	33	>sp|P25311|ZA2G_HUMAN Zinc-alpha-2-glycoprotein OS=Homo sapiens OX=9606 GN=AZGP1 PE=1 SV=2	18783	20210911_zy_urine_ethcd_1.7902.7902.3	controllerType=0 controllerNumber=1 scan=7902	35.3842
08812:3	29	R.SWPAVGN[+2204.772]C[+57.021]SSALR.W	HexNAc(4)Hex(5)NeuAc(2)	C[+57], N[+2205]	1203.82	3	3609.43	3609.44	0	-1.8	181	Specific	395.46	211.58	211.58	6.23	8	>sp|P02790|HEMO_HUMAN Hemopexin OS=Homo sapiens OX=9606 GN=HPX PE=1 SV=2	9336	20210911_zy_urine_ethcd_1.9672.9672.3	controllerType=0 controllerNumber=1 scan=9672	43.2672
08660:3	1	R.C[+57.021]NTAAPMWLN[+1913.677]GTHPSSDEGIVSR.K	HexNAc(4)Hex(5)NeuAc(1)	C[+57], N[+1914]	1471.94	3	4413.81	4413.81	0	-0.2	223	Specific	395.87	255.14	158.63	6.93	49	>sp|P07911|UROM_HUMAN Uromodulin OS=Homo sapiens OX=9606 GN=UMOD PE=1 SV=1	16609	20210911_zy_urine_ethcd_1.9505.9505.3	controllerType=0 controllerNumber=1 scan=9505	42.5094
10256:3	4	R.QNQC[+57.021]FYN[+2204.772]SSYLNVQR.E	HexNAc(4)Hex(5)NeuAc(2)	C[+57], N[+2205]	1375.88	3	4125.63	4125.64	0	-2.1	87	Specific	397.97	218.99	218.99	7.02	34	>sp|P19652|A1AG2_HUMAN Alpha-1-acid glycoprotein 2 OS=Homo sapiens OX=9606 GN=ORM2 PE=1 SV=2	4531	20210911_zy_urine_ethcd_1.11254.11254.3	controllerType=0 controllerNumber=1 scan=11254	50.3476
07195:3	8	K.DIVEYYNDSN[+2059.735]GSHVLQGR.F	HexNAc(4)Hex(5)Fuc(1)NeuAc(1)	N[+2060]	1375.56	3	4124.67	4125.69	-1	-3.6	103	Specific	398.23	254.43	61.98	7.03	33	>sp|P25311|ZA2G_HUMAN Zinc-alpha-2-glycoprotein OS=Homo sapiens OX=9606 GN=AZGP1 PE=1 SV=2	18783	20210911_zy_urine_ethcd_1.7901.7901.3	controllerType=0 controllerNumber=1 scan=7901	35.3791
01081:3	18	R.HN[+2350.830]STGC[+57.021]LR.M	HexNAc(4)Hex(5)Fuc(1)NeuAc(2)	C[+57], N[+2351]	1099.09	3	3295.26	3295.27	0	-2.1	290	Specific	398.25	157	157	5.59	18	>sp|P10909|CLUS_HUMAN Clusterin OS=Homo sapiens OX=9606 GN=CLU PE=1 SV=1	6125	20210911_zy_urine_ethcd_1.1194.1194.3	controllerType=0 controllerNumber=1 scan=1194	5.554
01525:3	41	K.KLN[+1460.529]YTLSQGHR.V	HexNAc(4)Hex(4)	N[+1461]	926.415	3	2777.23	2777.24	0	-1.4	126	Specific	398.53	212.64	212.64	5.5	8	>sp|P15144|AMPN_HUMAN Aminopeptidase N OS=Homo sapiens OX=9606 GN=ANPEP PE=1 SV=4	1209	20210911_zy_urine_ethcd_1.1681.1681.3	controllerType=0 controllerNumber=1 scan=1681	7.7705
13970:3	4	R.QNQC[+57.021]FYN[+3663.286]SSYLNVQR.E	HexNAc(6)Hex(7)Fuc(1)NeuAc(4)	C[+57], N[+3663]	1861.72	3	5583.14	5584.15	-1	-0.5	87	Specific	401.8	231.61	231.61	6.79	34	>sp|P19652|A1AG2_HUMAN Alpha-1-acid glycoprotein 2 OS=Homo sapiens OX=9606 GN=ORM2 PE=1 SV=2	4531	20210911_zy_urine_ethcd_1.15319.15319.3	controllerType=0 controllerNumber=1 scan=15319	68.3731
12337:4	4	R.QNQC[+57.021]FYN[+3372.190]SSYLNVQR.E	HexNAc(6)Hex(7)Fuc(1)NeuAc(3)	C[+57], N[+3372]	1324.02	4	5293.07	5293.06	0	1.9	87	Specific	402.27	231.73	231.73	6.34	34	>sp|P19652|A1AG2_HUMAN Alpha-1-acid glycoprotein 2 OS=Homo sapiens OX=9606 GN=ORM2 PE=1 SV=2	4531	20210911_zy_urine_ethcd_1.13533.13533.4	controllerType=0 controllerNumber=1 scan=13533	60.526
02553:3	10	R.EEQFN[+1647.613]STFR.V	HexNAc(5)Hex(3)Fuc(1)	N[+1648]	935.715	3	2805.13	2805.14	0	-2	172	Specific	402.68	178.86	178.86	6.17	27	>sp|P01859|IGHG2_HUMAN Immunoglobulin heavy constant gamma 2 OS=Homo sapiens OX=9606 GN=IGHG2 PE=1 SV=2	2858	20210911_zy_urine_ethcd_1.2806.2806.3	controllerType=0 controllerNumber=1 scan=2806	12.5228
01682:3	14	K.PREEQFN[+1606.587]STYR.V	HexNAc(4)Hex(4)Fuc(1)	N[+1607]	1011.76	3	3033.25	3033.26	0	-2.1	171	Specific	402.69	127.24	127.24	5.13	17	>sp|P01861|IGHG4_HUMAN Immunoglobulin heavy constant gamma 4 OS=Homo sapiens OX=9606 GN=IGHG4 PE=1 SV=1	12793	20210911_zy_urine_ethcd_1.1853.1853.3	controllerType=0 controllerNumber=1 scan=1853	8.4996
07179:3	8	K.DIVEYYN[+1913.677]DSNGSHVLQGR.F	HexNAc(4)Hex(5)NeuAc(1)	N[+1914]	1327.21	3	3979.62	3979.63	0	-3.7	103	Specific	403.35	248.09	52.02	6.86	33	>sp|P25311|ZA2G_HUMAN Zinc-alpha-2-glycoprotein OS=Homo sapiens OX=9606 GN=AZGP1 PE=1 SV=2	18783	20210911_zy_urine_ethcd_1.7883.7883.3	controllerType=0 controllerNumber=1 scan=7883	35.2988
02164:2	66	K.N[+1864.634]VTLLSR.Y	HexNAc(2)Hex(9)	N[+1865]	1334.06	2	2667.11	2667.11	0	-2.2	828	Specific	403.45	168.32	168.32	4.22	5	>sp|Q07075|AMPE_HUMAN Glutamyl aminopeptidase OS=Homo sapiens OX=9606 GN=ENPEP PE=1 SV=3	8362	20210911_zy_urine_ethcd_1.2379.2379.2	controllerType=0 controllerNumber=1 scan=2379	10.692
09812:3	63	K.TAIFAFN[+2059.735]ISHVSNK.V	HexNAc(4)Hex(5)Fuc(1)NeuAc(1)	N[+2060]	1203.52	3	3608.54	3608.55	0	-2.2	2761	Specific	404.05	137.17	137.17	4.89	5	>sp|P35555|FBN1_HUMAN Fibrillin-1 OS=Homo sapiens OX=9606 GN=FBN1 PE=1 SV=4	19906	20210911_zy_urine_ethcd_1.10768.10768.3	controllerType=0 controllerNumber=1 scan=10768	48.1972
12949:3	2	R.QDQC[+57.021]IYN[+3007.058]TTYLNVQR.E	HexNAc(5)Hex(6)Fuc(1)NeuAc(3)	C[+57], N[+3007]	1641.65	3	4922.95	4922.95	0	-1.4	87	Specific	404.27	265.38	265.38	6.79	53	>sp|P02763|A1AG1_HUMAN Alpha-1-acid glycoprotein 1 OS=Homo sapiens OX=9606 GN=ORM1 PE=1 SV=1	2208	20210911_zy_urine_ethcd_1.14203.14203.3	controllerType=0 controllerNumber=1 scan=14203	63.4827
08389:3	2	R.QDQC[+57.021]IYN[+2278.809]TTYLNVQR.E	HexNAc(5)Hex(6)NeuAc(1)	C[+57], N[+2279]	1398.91	3	4194.71	4194.71	0	1.3	87	Specific	404.31	200.58	200.58	6.08	53	>sp|P02763|A1AG1_HUMAN Alpha-1-acid glycoprotein 1 OS=Homo sapiens OX=9606 GN=ORM1 PE=1 SV=1	2208	20210911_zy_urine_ethcd_1.9208.9208.3	controllerType=0 controllerNumber=1 scan=9208	41.1965
12820:3	2	R.QDQC[+57.021]IYN[+3226.132]TTYLNVQR.E	HexNAc(6)Hex(7)NeuAc(3)	C[+57], N[+3226]	1714.68	3	5142.02	5142.03	0	-1.7	87	Specific	404.59	261.13	261.13	6.97	53	>sp|P02763|A1AG1_HUMAN Alpha-1-acid glycoprotein 1 OS=Homo sapiens OX=9606 GN=ORM1 PE=1 SV=1	2208	20210911_zy_urine_ethcd_1.14062.14062.3	controllerType=0 controllerNumber=1 scan=14062	62.8576
04246:3	6	K.TPLTAN[+2350.830]ITK.S	HexNAc(4)Hex(5)Fuc(1)NeuAc(2)	N[+2351]	1103.8	3	3309.38	3309.39	0	-2.1	200	Specific	405.47	186.31	186.31	6.24	32	>sp|P01877|IGHA2_HUMAN Immunoglobulin heavy constant alpha 2 OS=Homo sapiens OX=9606 GN=IGHA2 PE=1 SV=4	10403	20210911_zy_urine_ethcd_1.4665.4665.3	controllerType=0 controllerNumber=1 scan=4665	20.8785
14302:3	9	K.C[+57.021]GLVPVLAENYN[+2861.000]K.S	HexNAc(5)Hex(6)NeuAc(3)	C[+57], N[+2861]	1446.59	3	4337.74	4337.75	0	-1.5	421	Specific	407.4	268.97	268.97	6	20	>sp|P02787|TRFE_HUMAN Serotransferrin OS=Homo sapiens OX=9606 GN=TF PE=1 SV=3	18223	20210911_zy_urine_ethcd_1.15681.15681.3	controllerType=0 controllerNumber=1 scan=15681	69.9461
13433:4	19	K.VVLHPN[+2204.772]YSQVDIGLIK.L	HexNAc(4)Hex(5)NeuAc(2)	N[+2205]	1000.7	4	3999.77	3999.78	0	-2.5	236	Specific	408.8	239.52	239.52	6.42	20	>sp|P00738|HPT_HUMAN Haptoglobin OS=Homo sapiens OX=9606 GN=HP PE=1 SV=1	3044	20210911_zy_urine_ethcd_1.14732.14732.4	controllerType=0 controllerNumber=1 scan=14732	65.8041
11544:3	3	K.EN[+1913.677]LTAPGSDSAVFFEQGTTR.I	HexNAc(4)Hex(5)NeuAc(1)	N[+1914]	1347.56	3	4040.67	4040.68	0	-2.6	396	Specific	410.21	264.75	264.75	6.24	26	>sp|P00450|CERU_HUMAN Ceruloplasmin OS=Homo sapiens OX=9606 GN=CP PE=1 SV=1	460	20210911_zy_urine_ethcd_1.12664.12664.3	controllerType=0 controllerNumber=1 scan=12664	56.6229
06498:3	36	K.TC[+57.021]DWLPKPN[+1694.603]MSASC[+57.021]K.E	HexNAc(3)Hex(4)Fuc(1)NeuAc(1)	C[+57]*2, N[+1695]	1163.8	3	3489.39	3489.4	0	-2.6	93	Specific	413.2	269.51	269.51	6.92	9	>sp|P07602|SAP_HUMAN Prosaposin OS=Homo sapiens OX=9606 GN=PSAP PE=1 SV=2	14314	20210911_zy_urine_ethcd_1.7135.7135.3	controllerType=0 controllerNumber=1 scan=7135	31.9729
13731:4	4	R.QNQC[+57.021]FYN[+4028.418]SSYLNVQR.E	HexNAc(7)Hex(8)Fuc(1)NeuAc(4)	C[+57], N[+4028]	1488.08	4	5949.28	5949.28	0	-0.6	87	Specific	413.62	299.33	299.33	6.9	34	>sp|P19652|A1AG2_HUMAN Alpha-1-acid glycoprotein 2 OS=Homo sapiens OX=9606 GN=ORM2 PE=1 SV=2	4531	20210911_zy_urine_ethcd_1.15058.15058.4	controllerType=0 controllerNumber=1 scan=15058	67.243
10861:3	16	K.TAVN[+2204.772]C[+57.021]SSDFDAC[+57.021]LITK.A	HexNAc(4)Hex(5)NeuAc(2)	C[+57]*2, N[+2205]	1336.2	3	4006.57	4006.58	0	-2	40	Specific	413.63	270.63	270.63	6.5	11	>sp|P13987|CD59_HUMAN CD59 glycoprotein OS=Homo sapiens OX=9606 GN=CD59 PE=1 SV=1	1116	20210911_zy_urine_ethcd_1.11916.11916.3	controllerType=0 controllerNumber=1 scan=11916	53.2738
03338:3	10	R.EEQFN[+1897.682]STFR.V	HexNAc(4)Hex(4)Fuc(1)NeuAc(1)	N[+1898]	1019.07	3	3055.2	3055.2	0	-2.4	172	Specific	413.74	163.25	163.25	6.04	27	>sp|P01859|IGHG2_HUMAN Immunoglobulin heavy constant gamma 2 OS=Homo sapiens OX=9606 GN=IGHG2 PE=1 SV=2	2858	20210911_zy_urine_ethcd_1.3667.3667.3	controllerType=0 controllerNumber=1 scan=3667	16.3625
02495:3	10	K.PREEQFN[+2059.735]STFR.V	HexNAc(4)Hex(5)Fuc(1)NeuAc(1)	N[+2060]	1157.47	3	3470.41	3470.41	0	-0.7	170	Specific	414.95	204.38	204.38	4.81	27	>sp|P01859|IGHG2_HUMAN Immunoglobulin heavy constant gamma 2 OS=Homo sapiens OX=9606 GN=IGHG2 PE=1 SV=2	2858	20210911_zy_urine_ethcd_1.2742.2742.3	controllerType=0 controllerNumber=1 scan=2742	12.2349
04861:4	5	K.NC[+57.021]HHSGSQVPLIHC[+57.021]NLTTPSPQN[+568.212]ISNC[+57.021]R.Y	HexNAc(2)Hex(1)	C[+57]*3, N[+568]	949.926	4	3796.68	3796.7	0	-3.3	97	Specific	415.13	391.42	14.44	8.22	16	>sp|P10153|RNAS2_HUMAN Non-secretory ribonuclease OS=Homo sapiens OX=9606 GN=RNASE2 PE=1 SV=2	14694	20210911_zy_urine_ethcd_1.5340.5340.4	controllerType=0 controllerNumber=1 scan=5340	23.9389
04416:4	11	R.SRYPHKPEIN[+2350.830]STTHPGADLQENFC[+57.021]R.N	HexNAc(4)Hex(5)Fuc(1)NeuAc(2)	C[+57], N[+2351]	1326.81	4	5304.23	5305.23	-1	1.3	134	Specific	415.53	363.34	363.34	6.23	13	>sp|P00734|THRB_HUMAN Prothrombin OS=Homo sapiens OX=9606 GN=F2 PE=1 SV=2	18404	20210911_zy_urine_ethcd_1.4851.4851.4	controllerType=0 controllerNumber=1 scan=4851	21.7232
07814:3	15	R.GLTFQQN[+2262.814]ASSM[+15.995]C[+57.021]VPDQDTAIR.V	HexNAc(5)Hex(5)Fuc(1)NeuAc(1)	C[+57], M[+16], N[+2263]	1539.97	3	4617.88	4617.88	0	-0.6	203	Specific	415.58	269.23	35.9	6.96	12	>sp|P01871|IGHM_HUMAN Immunoglobulin heavy constant mu OS=Homo sapiens OX=9606 GN=IGHM PE=1 SV=4	10127	20210911_zy_urine_ethcd_1.8579.8579.3	controllerType=0 controllerNumber=1 scan=8579	38.4155
02571:3	10	K.PREEQFN[+1897.682]STFR.V	HexNAc(4)Hex(4)Fuc(1)NeuAc(1)	N[+1898]	1103.46	3	3308.35	3308.36	0	-1.4	170	Specific	415.95	194.03	194.03	4.99	27	>sp|P01859|IGHG2_HUMAN Immunoglobulin heavy constant gamma 2 OS=Homo sapiens OX=9606 GN=IGHG2 PE=1 SV=2	2858	20210911_zy_urine_ethcd_1.2826.2826.3	controllerType=0 controllerNumber=1 scan=2826	12.6107
02978:2	6	K.TPLTAN[+1403.507]ITK.S	HexNAc(3)Hex(4)Fuc(1)	N[+1404]	1181.53	2	2362.06	2362.06	0	-0.8	200	Specific	417.78	232.91	232.91	5.96	32	>sp|P01877|IGHA2_HUMAN Immunoglobulin heavy constant alpha 2 OS=Homo sapiens OX=9606 GN=IGHA2 PE=1 SV=4	10403	20210911_zy_urine_ethcd_1.3271.3271.2	controllerType=0 controllerNumber=1 scan=3271	14.5915
12916:3	9	K.C[+57.021]GLVPVLAENYN[+2204.772]K.S	HexNAc(4)Hex(5)NeuAc(2)	C[+57], N[+2205]	1227.84	3	3681.52	3681.52	0	-1.9	421	Specific	417.79	280.96	280.96	6.22	20	>sp|P02787|TRFE_HUMAN Serotransferrin OS=Homo sapiens OX=9606 GN=TF PE=1 SV=3	18223	20210911_zy_urine_ethcd_1.14167.14167.3	controllerType=0 controllerNumber=1 scan=14167	63.322
02989:3	8	R.FGC[+57.021]EIENN[+2204.772]R.S	HexNAc(4)Hex(5)NeuAc(2)	C[+57], N[+2205]	1115.09	3	3343.26	3343.27	0	-2.3	121	Specific	417.89	222.12	222.12	6.27	33	>sp|P25311|ZA2G_HUMAN Zinc-alpha-2-glycoprotein OS=Homo sapiens OX=9606 GN=AZGP1 PE=1 SV=2	18783	20210911_zy_urine_ethcd_1.3284.3284.3	controllerType=0 controllerNumber=1 scan=3284	14.6456
12798:3	9	K.C[+57.021]GLVPVLAENYN[+2350.830]K.S	HexNAc(4)Hex(5)Fuc(1)NeuAc(2)	C[+57], N[+2351]	1276.53	3	3827.57	3827.58	0	-1.9	421	Specific	417.94	285.45	285.45	6.22	20	>sp|P02787|TRFE_HUMAN Serotransferrin OS=Homo sapiens OX=9606 GN=TF PE=1 SV=3	18223	20210911_zy_urine_ethcd_1.14038.14038.3	controllerType=0 controllerNumber=1 scan=14038	62.7544
04214:3	12	R.ITYSIVQTN[+2100.761]C[+57.021]SK.E	HexNAc(5)Hex(4)Fuc(1)NeuAc(1)	C[+57], N[+2101]	1172.16	3	3514.46	3514.47	0	-2.1	197	Specific	419.16	278.94	278.94	5.94	26	>sp|P01042|KNG1_HUMAN Kininogen-1 OS=Homo sapiens OX=9606 GN=KNG1 PE=1 SV=2	6533	20210911_zy_urine_ethcd_1.4630.4630.3	controllerType=0 controllerNumber=1 scan=4630	20.722
08742:3	29	R.SWPAVGN[+2204.772]C[+57.021]SSALR.W	HexNAc(4)Hex(5)NeuAc(2)	C[+57], N[+2205]	1203.82	3	3609.43	3609.44	0	-2.1	181	Specific	419.46	213.75	213.75	6.23	8	>sp|P02790|HEMO_HUMAN Hemopexin OS=Homo sapiens OX=9606 GN=HPX PE=1 SV=2	9336	20210911_zy_urine_ethcd_1.9595.9595.3	controllerType=0 controllerNumber=1 scan=9595	42.915
14079:3	13	K.VPGN[+2350.830]VTAVLGETLK.V	HexNAc(4)Hex(5)Fuc(1)NeuAc(2)	N[+2351]	1250.21	3	3748.63	3748.63	0	-0.7	466	Specific	420	259.65	259.65	5.8	16	>sp|P01833|PIGR_HUMAN Polymeric immunoglobulin receptor OS=Homo sapiens OX=9606 GN=PIGR PE=1 SV=4	10083	20210911_zy_urine_ethcd_1.15438.15438.3	controllerType=0 controllerNumber=1 scan=15438	68.8906
03991:4	11	R.SRYPHKPEIN[+1913.677]STTHPGADLQENFC[+57.021]R.N	HexNAc(4)Hex(5)NeuAc(1)	C[+57], N[+1914]	1217.78	4	4868.1	4868.07	0	5.6	134	Specific	421.01	345.44	345.44	6.2	13	>sp|P00734|THRB_HUMAN Prothrombin OS=Homo sapiens OX=9606 GN=F2 PE=1 SV=2	18404	20210911_zy_urine_ethcd_1.4385.4385.4	controllerType=0 controllerNumber=1 scan=4385	19.6067
06202:4	5	K.NC[+57.021]HHSGSQVPLIHC[+57.021]N[+2262.814]LTTPSPQNISNC[+57.021]R.Y	HexNAc(5)Hex(5)Fuc(1)NeuAc(1)	C[+57]*3, N[+2263]	1373.57	4	5491.27	5491.3	0	-5.1	97	Specific	421.22	312.96	37.55	7.37	16	>sp|P10153|RNAS2_HUMAN Non-secretory ribonuclease OS=Homo sapiens OX=9606 GN=RNASE2 PE=1 SV=2	14694	20210911_zy_urine_ethcd_1.6811.6811.4	controllerType=0 controllerNumber=1 scan=6811	30.5434
01970:3	21	K.SN[+3081.095]SSMHITDC[+57.021]R.L	HexNAc(6)Hex(7)Fuc(1)NeuAc(2)	C[+57], N[+3081]	1463.55	3	4388.64	4388.64	0	-1	103	Specific	422.23	208.76	208.76	5.7	25	>sp|P07998|RNAS1_HUMAN Ribonuclease pancreatic OS=Homo sapiens OX=9606 GN=RNASE1 PE=1 SV=4	14690	20210911_zy_urine_ethcd_1.2166.2166.3	controllerType=0 controllerNumber=1 scan=2166	9.8105
02420:2	10	R.EEQFN[+1768.640]STFR.V	HexNAc(4)Hex(5)Fuc(1)	N[+1769]	1463.58	2	2926.16	2926.16	0	-1.3	172	Specific	422.53	183.75	183.75	6.26	27	>sp|P01859|IGHG2_HUMAN Immunoglobulin heavy constant gamma 2 OS=Homo sapiens OX=9606 GN=IGHG2 PE=1 SV=2	2858	20210911_zy_urine_ethcd_1.2658.2658.3	controllerType=0 controllerNumber=1 scan=2658	11.894
12078:4	4	R.QNQC[+57.021]FYN[+3372.190]SSYLNVQR.E	HexNAc(6)Hex(7)Fuc(1)NeuAc(3)	C[+57], N[+3372]	1323.77	4	5292.04	5293.06	-1	-2.1	87	Specific	422.71	246.1	246.1	7.55	34	>sp|P19652|A1AG2_HUMAN Alpha-1-acid glycoprotein 2 OS=Homo sapiens OX=9606 GN=ORM2 PE=1 SV=2	4531	20210911_zy_urine_ethcd_1.13250.13250.4	controllerType=0 controllerNumber=1 scan=13250	59.2826
07043:3	3	K.EHEGAIYPDN[+2861.000]TTDFQR.A	HexNAc(5)Hex(6)NeuAc(3)	N[+2861]	1585.62	3	4754.84	4753.84	1	-1.7	129	Specific	422.91	320.37	320.37	6.66	26	>sp|P00450|CERU_HUMAN Ceruloplasmin OS=Homo sapiens OX=9606 GN=CP PE=1 SV=1	460	20210911_zy_urine_ethcd_1.7734.7734.3	controllerType=0 controllerNumber=1 scan=7734	34.6412
15093:4	9	R.QQQHLFGSN[+2188.740]VTDC[+57.021]SGNFC[+57.021]LFR.S	HexNAc(2)Hex(11)	C[+57]*2, N[+2189]	1176.47	4	4702.86	4703.86	-1	-0.1	622	Specific	423.09	302.97	302.97	7.01	20	>sp|P02787|TRFE_HUMAN Serotransferrin OS=Homo sapiens OX=9606 GN=TF PE=1 SV=3	18223	20210911_zy_urine_ethcd_1.16546.16546.4	controllerType=0 controllerNumber=1 scan=16546	73.754
02404:2	10	R.EEQFN[+1403.507]STFR.V	HexNAc(3)Hex(4)Fuc(1)	N[+1404]	1281.02	2	2561.02	2561.03	0	-1.9	172	Specific	423.3	226.81	226.81	6.47	27	>sp|P01859|IGHG2_HUMAN Immunoglobulin heavy constant gamma 2 OS=Homo sapiens OX=9606 GN=IGHG2 PE=1 SV=2	2858	20210911_zy_urine_ethcd_1.2641.2641.2	controllerType=0 controllerNumber=1 scan=2641	11.8222
12556:4	4	R.QNQC[+57.021]FYN[+2861.000]SSYLNVQR.E	HexNAc(5)Hex(6)NeuAc(3)	C[+57], N[+2861]	1196.22	4	4781.85	4781.87	0	-3.3	87	Specific	424.17	294.78	294.78	7.04	34	>sp|P19652|A1AG2_HUMAN Alpha-1-acid glycoprotein 2 OS=Homo sapiens OX=9606 GN=ORM2 PE=1 SV=2	4531	20210911_zy_urine_ethcd_1.13773.13773.4	controllerType=0 controllerNumber=1 scan=13773	61.5829
14632:3	33	K.SVVAPATDGGLN[+2059.735]LTSTFLR.K	HexNAc(4)Hex(5)Fuc(1)NeuAc(1)	N[+2060]	1326.92	3	3978.75	3978.76	0	-2.3	67	Specific	424.68	256.6	256.6	6.37	11	>sp|P41222|PTGDS_HUMAN Prostaglandin-H2 D-isomerase OS=Homo sapiens OX=9606 GN=PTGDS PE=1 SV=1	16974	20210911_zy_urine_ethcd_1.16042.16042.4	controllerType=0 controllerNumber=1 scan=16042	71.5385
11932:3	7	R.ADGTVNQIEGEATPVN[+2204.772]LTEPAK.L	HexNAc(4)Hex(5)NeuAc(2)	N[+2205]	1486.64	3	4457.89	4458.89	-1	0.8	83	Specific	424.97	296.44	296.44	6.76	25	>sp|P05090|APOD_HUMAN Apolipoprotein D OS=Homo sapiens OX=9606 GN=APOD PE=1 SV=1	120	20210911_zy_urine_ethcd_1.13090.13090.4	controllerType=0 controllerNumber=1 scan=13090	58.5658
07390:3	31	K.NYHQPAILN[+2350.830]SSALR.Q	HexNAc(4)Hex(5)Fuc(1)NeuAc(2)	N[+2351]	1312.22	3	3934.65	3934.66	0	-1.8	41	Specific	425.67	232.13	232.13	6.43	5	>sp|Q16769|QPCT_HUMAN Glutaminyl-peptide cyclotransferase OS=Homo sapiens OX=9606 GN=QPCT PE=1 SV=1	12985	20210911_zy_urine_ethcd_1.8115.8115.3	controllerType=0 controllerNumber=1 scan=8115	36.3357
07052:4	3	K.EHEGAIYPDN[+2861.000]TTDFQR.A	HexNAc(5)Hex(6)NeuAc(3)	N[+2861]	1189.21	4	4753.83	4753.84	0	-3	129	Specific	425.81	327.62	327.62	6.77	26	>sp|P00450|CERU_HUMAN Ceruloplasmin OS=Homo sapiens OX=9606 GN=CP PE=1 SV=1	460	20210911_zy_urine_ethcd_1.7744.7744.5	controllerType=0 controllerNumber=1 scan=7744	34.685
08299:3	16	K.TAVN[+2407.852]C[+57.021]SSDFDAC[+57.021]LITK.A	HexNAc(5)Hex(5)NeuAc(2)	C[+57]*2, N[+2408]	1404.23	3	4210.68	4209.66	1	2.8	40	Specific	426.11	304.91	304.91	5.61	11	>sp|P13987|CD59_HUMAN CD59 glycoprotein OS=Homo sapiens OX=9606 GN=CD59 PE=1 SV=1	1116	20210911_zy_urine_ethcd_1.9110.9110.3	controllerType=0 controllerNumber=1 scan=9110	40.7646
05400:3	3	K.EHEGAIYPDN[+2350.830]TTDFQR.A	HexNAc(4)Hex(5)Fuc(1)NeuAc(2)	N[+2351]	1414.89	3	4242.66	4243.67	-1	-2.5	129	Specific	427.12	255.37	255.37	6.74	26	>sp|P00450|CERU_HUMAN Ceruloplasmin OS=Homo sapiens OX=9606 GN=CP PE=1 SV=1	460	20210911_zy_urine_ethcd_1.5931.5931.3	controllerType=0 controllerNumber=1 scan=5931	26.5982
10119:3	4	R.QNQC[+57.021]FYN[+2715.963]SSYLNVQR.E	HexNAc(5)Hex(6)Fuc(1)NeuAc(2)	C[+57], N[+2716]	1546.28	3	4636.83	4636.83	0	-0.5	87	Specific	430.27	250.62	250.62	6.32	34	>sp|P19652|A1AG2_HUMAN Alpha-1-acid glycoprotein 2 OS=Homo sapiens OX=9606 GN=ORM2 PE=1 SV=2	4531	20210911_zy_urine_ethcd_1.11104.11104.3	controllerType=0 controllerNumber=1 scan=11104	49.6877
12756:3	9	K.C[+57.021]GLVPVLAENYN[+2204.772]K.S	HexNAc(4)Hex(5)NeuAc(2)	C[+57], N[+2205]	1227.84	3	3681.51	3681.52	0	-2.4	421	Specific	430.33	289.85	289.85	6.2	20	>sp|P02787|TRFE_HUMAN Serotransferrin OS=Homo sapiens OX=9606 GN=TF PE=1 SV=3	18223	20210911_zy_urine_ethcd_1.13992.13992.3	controllerType=0 controllerNumber=1 scan=13992	62.5518
14102:3	13	K.VPGN[+2391.857]VTAVLGETLK.V	HexNAc(5)Hex(4)Fuc(1)NeuAc(2)	N[+2392]	1263.89	3	3789.65	3789.66	0	-1.7	466	Specific	430.51	272.37	272.37	6.3	16	>sp|P01833|PIGR_HUMAN Polymeric immunoglobulin receptor OS=Homo sapiens OX=9606 GN=PIGR PE=1 SV=4	10083	20210911_zy_urine_ethcd_1.15463.15463.3	controllerType=0 controllerNumber=1 scan=15463	68.9988
12845:3	9	K.C[+57.021]GLVPVLAENYN[+2204.772]K.S	HexNAc(4)Hex(5)NeuAc(2)	C[+57], N[+2205]	1227.84	3	3681.52	3681.52	0	-2	421	Specific	430.88	261.04	261.04	6.3	20	>sp|P02787|TRFE_HUMAN Serotransferrin OS=Homo sapiens OX=9606 GN=TF PE=1 SV=3	18223	20210911_zy_urine_ethcd_1.14089.14089.3	controllerType=0 controllerNumber=1 scan=14089	62.9753
12848:4	1	R.C[+57.021]NTAAPMWLN[+2861.000]GTHPSSDEGIVSR.K	HexNAc(5)Hex(6)NeuAc(3)	C[+57], N[+2861]	1341.29	4	5362.14	5361.13	1	0.1	223	Specific	431.51	342.53	342.53	7.32	49	>sp|P07911|UROM_HUMAN Uromodulin OS=Homo sapiens OX=9606 GN=UMOD PE=1 SV=1	16609	20210911_zy_urine_ethcd_1.14092.14092.4	controllerType=0 controllerNumber=1 scan=14092	62.9888
07938:4	3	K.ELHHLQEQN[+3007.058]VSNAFLDK.G	HexNAc(5)Hex(6)Fuc(1)NeuAc(3)	N[+3007]	1257.77	4	5028.05	5029.06	-1	-1.6	754	Specific	431.82	354.3	354.3	7.05	26	>sp|P00450|CERU_HUMAN Ceruloplasmin OS=Homo sapiens OX=9606 GN=CP PE=1 SV=1	460	20210911_zy_urine_ethcd_1.8715.8715.4	controllerType=0 controllerNumber=1 scan=8715	39.0196
03321:3	10	R.EEQFN[+2018.708]STFR.V	HexNAc(3)Hex(6)Fuc(1)NeuAc(1)	N[+2019]	1059.41	3	3176.22	3176.23	0	-2.4	172	Specific	432	181.77	181.77	6.22	27	>sp|P01859|IGHG2_HUMAN Immunoglobulin heavy constant gamma 2 OS=Homo sapiens OX=9606 GN=IGHG2 PE=1 SV=2	2858	20210911_zy_urine_ethcd_1.3649.3649.3	controllerType=0 controllerNumber=1 scan=3649	16.2792
13249:3	16	K.TAVN[+3007.058]C[+57.021]SSDFDAC[+57.021]LITK.A	HexNAc(5)Hex(6)Fuc(1)NeuAc(3)	C[+57]*2, N[+3007]	1603.62	3	4808.86	4808.87	0	-2.4	40	Specific	433	297.97	297.97	6.52	11	>sp|P13987|CD59_HUMAN CD59 glycoprotein OS=Homo sapiens OX=9606 GN=CD59 PE=1 SV=1	1116	20210911_zy_urine_ethcd_1.14531.14531.3	controllerType=0 controllerNumber=1 scan=14531	64.9274
05325:3	31	K.NYHQPAILN[+2262.814]SSALR.Q	HexNAc(5)Hex(5)Fuc(1)NeuAc(1)	N[+2263]	1282.88	3	3846.63	3846.64	0	-4.1	41	Specific	433.54	203.56	203.56	6.3	5	>sp|Q16769|QPCT_HUMAN Glutaminyl-peptide cyclotransferase OS=Homo sapiens OX=9606 GN=QPCT PE=1 SV=1	12985	20210911_zy_urine_ethcd_1.5849.5849.3	controllerType=0 controllerNumber=1 scan=5849	26.2274
14947:3	1	R.FALLMTNC[+57.021]YATPSSN[+2350.830]ATDPLK.Y	HexNAc(4)Hex(5)Fuc(1)NeuAc(2)	C[+57], N[+2351]	1555.98	3	4665.92	4665.94	0	-3	499	Specific	434.13	334.47	66.18	7.39	49	>sp|P07911|UROM_HUMAN Uromodulin OS=Homo sapiens OX=9606 GN=UMOD PE=1 SV=1	16609	20210911_zy_urine_ethcd_1.16387.16387.3	controllerType=0 controllerNumber=1 scan=16387	73.047
09047:3	27	R.N[+1378.476]ETQHEPYPLM[+15.995]LPGC[+57.021]SPSC[+57.021]PLER.F	HexNAc(2)Hex(6)	C[+57]*2, M[+16], N[+1378]	1369.57	3	4106.69	4106.69	0	-0.7	333	Specific	437.19	336.32	336.32	7.7	13	>sp|P15309|PPAP_HUMAN Prostatic acid phosphatase OS=Homo sapiens OX=9606 GN=ACPP PE=1 SV=3	14195	20210911_zy_urine_ethcd_1.9930.9930.3	controllerType=0 controllerNumber=1 scan=9930	44.4342
06479:3	16	K.TAVN[+1971.719]C[+57.021]SSDFDAC[+57.021]LITK.A	HexNAc(5)Hex(5)Fuc(1)	C[+57]*2, N[+1972]	1258.51	3	3773.52	3773.53	0	-1.2	40	Specific	437.48	307.05	307.05	6.58	11	>sp|P13987|CD59_HUMAN CD59 glycoprotein OS=Homo sapiens OX=9606 GN=CD59 PE=1 SV=1	1116	20210911_zy_urine_ethcd_1.7114.7114.3	controllerType=0 controllerNumber=1 scan=7114	31.8801
14058:3	2	R.QDQC[+57.021]IYN[+3517.228]TTYLNVQR.E	HexNAc(6)Hex(7)NeuAc(4)	C[+57], N[+3517]	1811.71	3	5433.12	5433.12	0	0	87	Specific	437.62	262.49	262.49	6.3	53	>sp|P02763|A1AG1_HUMAN Alpha-1-acid glycoprotein 1 OS=Homo sapiens OX=9606 GN=ORM1 PE=1 SV=1	2208	20210911_zy_urine_ethcd_1.15415.15415.3	controllerType=0 controllerNumber=1 scan=15415	68.7886
02054:3	10	K.PREEQFN[+1606.587]STFR.V	HexNAc(4)Hex(4)Fuc(1)	N[+1607]	1006.42	3	3017.25	3017.26	0	-3.4	170	Specific	438.29	238.02	238.02	4.95	27	>sp|P01859|IGHG2_HUMAN Immunoglobulin heavy constant gamma 2 OS=Homo sapiens OX=9606 GN=IGHG2 PE=1 SV=2	2858	20210911_zy_urine_ethcd_1.2259.2259.3	controllerType=0 controllerNumber=1 scan=2259	10.1833
03002:3	6	K.TPLTAN[+2262.814]ITK.S	HexNAc(5)Hex(5)Fuc(1)NeuAc(1)	N[+2263]	1074.46	3	3221.36	3221.37	0	-2.3	200	Specific	438.56	172.63	172.63	6.15	32	>sp|P01877|IGHA2_HUMAN Immunoglobulin heavy constant alpha 2 OS=Homo sapiens OX=9606 GN=IGHA2 PE=1 SV=4	10403	20210911_zy_urine_ethcd_1.3298.3298.3	controllerType=0 controllerNumber=1 scan=3298	14.6966
10160:3	4	R.QNQC[+57.021]FYN[+2715.963]SSYLNVQR.E	HexNAc(5)Hex(6)Fuc(1)NeuAc(2)	C[+57], N[+2716]	1545.95	3	4635.83	4636.83	-1	0.2	87	Specific	438.81	267.53	267.53	6.3	34	>sp|P19652|A1AG2_HUMAN Alpha-1-acid glycoprotein 2 OS=Homo sapiens OX=9606 GN=ORM2 PE=1 SV=2	4531	20210911_zy_urine_ethcd_1.11149.11149.3	controllerType=0 controllerNumber=1 scan=11149	49.8838
12895:3	2	R.QDQC[+57.021]IYN[+3007.058]TTYLNVQR.E	HexNAc(5)Hex(6)Fuc(1)NeuAc(3)	C[+57], N[+3007]	1641.32	3	4921.95	4922.95	-1	-0.8	87	Specific	439.62	287.78	287.78	6.88	53	>sp|P02763|A1AG1_HUMAN Alpha-1-acid glycoprotein 1 OS=Homo sapiens OX=9606 GN=ORM1 PE=1 SV=1	2208	20210911_zy_urine_ethcd_1.14144.14144.3	controllerType=0 controllerNumber=1 scan=14144	63.2194
12109:3	7	R.ADGTVNQIEGEATPVN[+2204.772]LTEPAK.L	HexNAc(4)Hex(5)NeuAc(2)	N[+2205]	1486.97	3	4458.88	4458.89	0	-1.6	83	Specific	441.13	331.26	331.26	7.52	25	>sp|P05090|APOD_HUMAN Apolipoprotein D OS=Homo sapiens OX=9606 GN=APOD PE=1 SV=1	120	20210911_zy_urine_ethcd_1.13284.13284.3	controllerType=0 controllerNumber=1 scan=13284	59.4317
05508:3	43	R.PVTPIAQN[+2204.772]QTTLGSSR.A	HexNAc(4)Hex(5)NeuAc(2)	N[+2205]	1292.22	3	3874.64	3874.66	0	-4.4	235	Specific	441.83	236.99	236.99	6.36	4	>sp|Q9NZP8|C1RL_HUMAN Complement C1r subcomponent-like protein OS=Homo sapiens OX=9606 GN=C1RL PE=1 SV=2	126	20210911_zy_urine_ethcd_1.6050.6050.3	controllerType=0 controllerNumber=1 scan=6050	27.1226
04876:3	13	K.WN[+2204.772]NTGC[+57.021]QALPSQDEGPSK.A	HexNAc(4)Hex(5)NeuAc(2)	C[+57], N[+2205]	1398.55	3	4193.64	4193.65	0	-1.3	498	Specific	441.98	307.38	307.38	6.92	16	>sp|P01833|PIGR_HUMAN Polymeric immunoglobulin receptor OS=Homo sapiens OX=9606 GN=PIGR PE=1 SV=4	10083	20210911_zy_urine_ethcd_1.5356.5356.3	controllerType=0 controllerNumber=1 scan=5356	24.0108
14007:4	2	R.QDQC[+57.021]IYN[+3663.286]TTYLNVQR.E	HexNAc(6)Hex(7)Fuc(1)NeuAc(4)	C[+57], N[+3663]	1395.3	4	5578.16	5579.18	-1	-2.5	87	Specific	443.64	338.76	338.76	7.63	53	>sp|P02763|A1AG1_HUMAN Alpha-1-acid glycoprotein 1 OS=Homo sapiens OX=9606 GN=ORM1 PE=1 SV=1	2208	20210911_zy_urine_ethcd_1.15359.15359.2	controllerType=0 controllerNumber=1 scan=15359	68.55
04406:3	32	R.N[+2059.735]GSQAFVHWQEPR.A	HexNAc(4)Hex(5)Fuc(1)NeuAc(1)	N[+2060]	1205.83	3	3615.47	3615.47	0	-1.7	345	Specific	443.68	207.67	207.67	6.37	7	>sp|P30530|UFO_HUMAN Tyrosine-protein kinase receptor UFO OS=Homo sapiens OX=9606 GN=AXL PE=1 SV=4	18964	20210911_zy_urine_ethcd_1.4841.4841.3	controllerType=0 controllerNumber=1 scan=4841	21.6761
09834:3	7	R.ADGTVNQIEGEATPVN[+2059.735]LTEPAK.L	HexNAc(4)Hex(5)Fuc(1)NeuAc(1)	N[+2060]	1438.28	3	4312.84	4313.85	-1	-2.8	83	Specific	444	306.44	306.44	7.6	25	>sp|P05090|APOD_HUMAN Apolipoprotein D OS=Homo sapiens OX=9606 GN=APOD PE=1 SV=1	120	20210911_zy_urine_ethcd_1.10792.10792.3	controllerType=0 controllerNumber=1 scan=10792	48.3019
03287:3	10	R.EEQFN[+2059.735]STFR.V	HexNAc(4)Hex(5)Fuc(1)NeuAc(1)	N[+2060]	1073.09	3	3217.25	3217.26	0	-2.8	172	Specific	444.74	157.23	157.23	6.11	27	>sp|P01859|IGHG2_HUMAN Immunoglobulin heavy constant gamma 2 OS=Homo sapiens OX=9606 GN=IGHG2 PE=1 SV=2	2858	20210911_zy_urine_ethcd_1.3611.3611.3	controllerType=0 controllerNumber=1 scan=3611	16.1069
13475:3	3	K.EN[+2350.830]LTAPGSDSAVFFEQGTTR.I	HexNAc(4)Hex(5)Fuc(1)NeuAc(2)	N[+2351]	1493.28	3	4477.82	4477.83	0	-2.3	396	Specific	445.22	311.78	311.78	6.58	26	>sp|P00450|CERU_HUMAN Ceruloplasmin OS=Homo sapiens OX=9606 GN=CP PE=1 SV=1	460	20210911_zy_urine_ethcd_1.14778.14778.3	controllerType=0 controllerNumber=1 scan=14778	66.0083
02125:3	6	K.HYTN[+2059.735]SSQDVTVPC[+57.021]R.V	HexNAc(4)Hex(5)Fuc(1)NeuAc(1)	C[+57], N[+2060]	1241.83	3	3723.46	3723.48	0	-5.3	89	Specific	446.86	239.73	239.73	5.94	32	>sp|P01877|IGHA2_HUMAN Immunoglobulin heavy constant alpha 2 OS=Homo sapiens OX=9606 GN=IGHA2 PE=1 SV=4	10403	20210911_zy_urine_ethcd_1.2336.2336.3	controllerType=0 controllerNumber=1 scan=2336	10.5082
01883:2	14	R.EEQFN[+1768.640]STYR.V	HexNAc(4)Hex(5)Fuc(1)	N[+1769]	1471.58	2	2942.15	2942.16	0	-1.7	173	Specific	446.92	172.95	172.95	6.12	17	>sp|P01861|IGHG4_HUMAN Immunoglobulin heavy constant gamma 4 OS=Homo sapiens OX=9606 GN=IGHG4 PE=1 SV=1	12793	20210911_zy_urine_ethcd_1.2072.2072.2	controllerType=0 controllerNumber=1 scan=2072	9.4273
06996:3	3	K.EHEGAIYPDN[+3007.058]TTDFQR.A	HexNAc(5)Hex(6)Fuc(1)NeuAc(3)	N[+3007]	1633.97	3	4899.89	4899.9	0	-1.1	129	Specific	447.07	305.03	305.03	6.6	26	>sp|P00450|CERU_HUMAN Ceruloplasmin OS=Homo sapiens OX=9606 GN=CP PE=1 SV=1	460	20210911_zy_urine_ethcd_1.7683.7683.3	controllerType=0 controllerNumber=1 scan=7683	34.4167
02462:3	6	K.HYTN[+2350.830]SSQDVTVPC[+57.021]R.V	HexNAc(4)Hex(5)Fuc(1)NeuAc(2)	C[+57], N[+2351]	1339.19	3	4015.56	4014.58	1	-5.3	89	Specific	447.59	234.07	79.88	5.94	32	>sp|P01877|IGHA2_HUMAN Immunoglobulin heavy constant alpha 2 OS=Homo sapiens OX=9606 GN=IGHA2 PE=1 SV=4	10403	20210911_zy_urine_ethcd_1.2705.2705.3	controllerType=0 controllerNumber=1 scan=2705	12.0887
10331:3	2	R.QDQC[+57.021]IYN[+2935.037]TTYLNVQR.E	HexNAc(6)Hex(7)NeuAc(2)	C[+57], N[+2935]	1617.65	3	4850.93	4850.93	0	-0.1	87	Specific	451.5	255.91	255.91	6.26	53	>sp|P02763|A1AG1_HUMAN Alpha-1-acid glycoprotein 1 OS=Homo sapiens OX=9606 GN=ORM1 PE=1 SV=1	2208	20210911_zy_urine_ethcd_1.11336.11336.3	controllerType=0 controllerNumber=1 scan=11336	50.7077
13485:3	3	K.EN[+2350.830]LTAPGSDSAVFFEQGTTR.I	HexNAc(4)Hex(5)Fuc(1)NeuAc(2)	N[+2351]	1492.94	3	4476.82	4477.83	-1	-2.1	396	Specific	452.7	310.21	310.21	6.74	26	>sp|P00450|CERU_HUMAN Ceruloplasmin OS=Homo sapiens OX=9606 GN=CP PE=1 SV=1	460	20210911_zy_urine_ethcd_1.14789.14789.3	controllerType=0 controllerNumber=1 scan=14789	66.0561
12473:4	4	R.QNQC[+57.021]FYN[+2878.015]SSYLNVQR.E	HexNAc(5)Hex(7)Fuc(1)NeuAc(2)	C[+57], N[+2878]	1200.48	4	4798.88	4798.88	0	0.1	87	Specific	453.42	263.05	263.05	6.37	34	>sp|P19652|A1AG2_HUMAN Alpha-1-acid glycoprotein 2 OS=Homo sapiens OX=9606 GN=ORM2 PE=1 SV=2	4531	20210911_zy_urine_ethcd_1.13682.13682.4	controllerType=0 controllerNumber=1 scan=13682	61.1809
08108:4	3	K.ELHHLQEQN[+3007.058]VSNAFLDK.G	HexNAc(5)Hex(6)Fuc(1)NeuAc(3)	N[+3007]	1257.77	4	5028.05	5029.06	-1	-2.2	754	Specific	453.8	376.81	376.81	7.24	26	>sp|P00450|CERU_HUMAN Ceruloplasmin OS=Homo sapiens OX=9606 GN=CP PE=1 SV=1	460	20210911_zy_urine_ethcd_1.8901.8901.4	controllerType=0 controllerNumber=1 scan=8901	39.841
08399:3	16	K.TAVN[+2059.735]C[+57.021]SSDFDAC[+57.021]LITK.A	HexNAc(4)Hex(5)Fuc(1)NeuAc(1)	C[+57]*2, N[+2060]	1287.85	3	3861.54	3861.54	0	-1.2	40	Specific	454.3	321.14	321.14	6.66	11	>sp|P13987|CD59_HUMAN CD59 glycoprotein OS=Homo sapiens OX=9606 GN=CD59 PE=1 SV=1	1116	20210911_zy_urine_ethcd_1.9219.9219.3	controllerType=0 controllerNumber=1 scan=9219	41.2432
08682:3	1	R.C[+57.021]NTAAPMWLN[+1954.704]GTHPSSDEGIVSR.K	HexNAc(5)Hex(4)NeuAc(1)	C[+57], N[+1955]	1485.61	3	4454.82	4454.84	0	-3.7	223	Specific	454.49	336.11	175.58	7.91	49	>sp|P07911|UROM_HUMAN Uromodulin OS=Homo sapiens OX=9606 GN=UMOD PE=1 SV=1	16609	20210911_zy_urine_ethcd_1.9529.9529.3	controllerType=0 controllerNumber=1 scan=9529	42.6184
04400:3	32	R.N[+2059.735]GSQAFVHWQEPR.A	HexNAc(4)Hex(5)Fuc(1)NeuAc(1)	N[+2060]	1205.83	3	3615.47	3615.47	0	-2.5	345	Specific	454.76	203.13	203.13	6.24	7	>sp|P30530|UFO_HUMAN Tyrosine-protein kinase receptor UFO OS=Homo sapiens OX=9606 GN=AXL PE=1 SV=4	18964	20210911_zy_urine_ethcd_1.4834.4834.3	controllerType=0 controllerNumber=1 scan=4834	21.6465
10807:3	15	R.GLTFQQN[+2059.735]ASSMC[+57.021]VPDQDTAIR.V	HexNAc(4)Hex(5)Fuc(1)NeuAc(1)	C[+57], N[+2060]	1466.94	3	4398.8	4398.81	0	-2	203	Specific	455.68	309.86	309.86	7.57	12	>sp|P01871|IGHM_HUMAN Immunoglobulin heavy constant mu OS=Homo sapiens OX=9606 GN=IGHM PE=1 SV=4	10127	20210911_zy_urine_ethcd_1.11857.11857.3	controllerType=0 controllerNumber=1 scan=11857	53.0135
06497:3	3	K.ELHHLQEQN[+2204.772]VSNAFLDK.G	HexNAc(4)Hex(5)NeuAc(2)	N[+2205]	1409.6	3	4226.77	4226.78	0	-1	754	Specific	455.72	317.22	317.22	5.8	26	>sp|P00450|CERU_HUMAN Ceruloplasmin OS=Homo sapiens OX=9606 GN=CP PE=1 SV=1	460	20210911_zy_urine_ethcd_1.7133.7133.2	controllerType=0 controllerNumber=1 scan=7133	31.9659
10034:3	7	R.ADGTVNQIEGEATPVN[+1897.682]LTEPAK.L	HexNAc(4)Hex(4)Fuc(1)NeuAc(1)	N[+1898]	1384.61	3	4151.81	4151.8	0	3	83	Specific	457	351.66	351.66	6.63	25	>sp|P05090|APOD_HUMAN Apolipoprotein D OS=Homo sapiens OX=9606 GN=APOD PE=1 SV=1	120	20210911_zy_urine_ethcd_1.11011.11011.3	controllerType=0 controllerNumber=1 scan=11011	49.2736
02960:3	30	R.VYKPSAGN[+2204.772]NSLYR.D	HexNAc(4)Hex(5)NeuAc(2)	N[+2205]	1225.18	3	3673.52	3673.53	0	-1.6	155	Specific	457.36	214.01	214.01	6.19	7	>sp|P02749|APOH_HUMAN Beta-2-glycoprotein 1 OS=Homo sapiens OX=9606 GN=APOH PE=1 SV=3	19971	20210911_zy_urine_ethcd_1.3252.3252.3	controllerType=0 controllerNumber=1 scan=3252	14.5066
12287:4	4	R.QNQC[+57.021]FYN[+3372.190]SSYLNVQR.E	HexNAc(6)Hex(7)Fuc(1)NeuAc(3)	C[+57], N[+3372]	1324.02	4	5293.05	5293.06	0	-0.4	87	Specific	458.58	303	303	6.68	34	>sp|P19652|A1AG2_HUMAN Alpha-1-acid glycoprotein 2 OS=Homo sapiens OX=9606 GN=ORM2 PE=1 SV=2	4531	20210911_zy_urine_ethcd_1.13478.13478.4	controllerType=0 controllerNumber=1 scan=13478	60.2869
10490:3	8	K.DIVEYYNDSN[+2204.772]GSHVLQGR.F	HexNAc(4)Hex(5)NeuAc(2)	N[+2205]	1424.57	3	4271.71	4270.73	1	-5.8	103	Specific	459.94	297.13	2.32	6.67	33	>sp|P25311|ZA2G_HUMAN Zinc-alpha-2-glycoprotein OS=Homo sapiens OX=9606 GN=AZGP1 PE=1 SV=2	18783	20210911_zy_urine_ethcd_1.11510.11510.3	controllerType=0 controllerNumber=1 scan=11510	51.4773
03057:3	6	K.TPLTAN[+2100.761]ITK.S	HexNAc(5)Hex(4)Fuc(1)NeuAc(1)	N[+2101]	1020.44	3	3059.31	3059.32	0	-2.1	200	Specific	460.88	190.08	190.08	6.29	32	>sp|P01877|IGHA2_HUMAN Immunoglobulin heavy constant alpha 2 OS=Homo sapiens OX=9606 GN=IGHA2 PE=1 SV=4	10403	20210911_zy_urine_ethcd_1.3358.3358.3	controllerType=0 controllerNumber=1 scan=3358	14.944
15011:3	75	K.YLGN[+1913.677]ATAIFFLPDEGK.L	HexNAc(4)Hex(5)NeuAc(1)	N[+1914]	1223.86	3	3669.57	3669.57	0	-1.3	268	Specific	461.71	275.62	275.62	5.02	1	>sp|P01009|A1AT_HUMAN Alpha-1-antitrypsin OS=Homo sapiens OX=9606 GN=SERPINA1 PE=1 SV=3	20395	20210911_zy_urine_ethcd_1.16457.16457.3	controllerType=0 controllerNumber=1 scan=16457	73.3565
02970:3	6	K.TPLTAN[+2059.735]ITK.S	HexNAc(4)Hex(5)Fuc(1)NeuAc(1)	N[+2060]	1006.77	3	3018.28	3018.29	0	-2.5	200	Specific	461.9	193.44	193.44	6.16	32	>sp|P01877|IGHA2_HUMAN Immunoglobulin heavy constant alpha 2 OS=Homo sapiens OX=9606 GN=IGHA2 PE=1 SV=4	10403	20210911_zy_urine_ethcd_1.3263.3263.3	controllerType=0 controllerNumber=1 scan=3263	14.5555
10554:4	8	K.DIVEYYN[+3007.058]DSNGSHVLQGR.F	HexNAc(5)Hex(6)Fuc(1)NeuAc(3)	N[+3007]	1268.76	4	5072.02	5073.02	-1	1.4	103	Specific	462.5	324.47	85.12	6.43	33	>sp|P25311|ZA2G_HUMAN Zinc-alpha-2-glycoprotein OS=Homo sapiens OX=9606 GN=AZGP1 PE=1 SV=2	18783	20210911_zy_urine_ethcd_1.11580.11580.4	controllerType=0 controllerNumber=1 scan=11580	51.7856
12980:4	2	R.QDQC[+57.021]IYN[+2861.000]TTYLNVQR.E	HexNAc(5)Hex(6)NeuAc(3)	C[+57], N[+2861]	1194.73	4	4775.88	4776.9	-1	-2.1	87	Specific	463.05	295.66	295.66	7.51	53	>sp|P02763|A1AG1_HUMAN Alpha-1-acid glycoprotein 1 OS=Homo sapiens OX=9606 GN=ORM1 PE=1 SV=1	2208	20210911_zy_urine_ethcd_1.14237.14237.4	controllerType=0 controllerNumber=1 scan=14237	63.6353
07623:4	5	K.NC[+57.021]HHSGSQVPLIHC[+57.021]N[+2350.830]LTTPSPQNISNC[+57.021]R.Y	HexNAc(4)Hex(5)Fuc(1)NeuAc(2)	C[+57]*3, N[+2351]	1395.33	4	5578.29	5579.31	-1	-4.3	97	Specific	463.51	381.41	25.87	8.86	16	>sp|P10153|RNAS2_HUMAN Non-secretory ribonuclease OS=Homo sapiens OX=9606 GN=RNASE2 PE=1 SV=2	14694	20210911_zy_urine_ethcd_1.8370.8370.4	controllerType=0 controllerNumber=1 scan=8370	37.468
11551:3	3	K.EN[+1913.677]LTAPGSDSAVFFEQGTTR.I	HexNAc(4)Hex(5)NeuAc(1)	N[+1914]	1347.56	3	4040.67	4040.68	0	-0.9	396	Specific	467.13	339.4	339.4	6.31	26	>sp|P00450|CERU_HUMAN Ceruloplasmin OS=Homo sapiens OX=9606 GN=CP PE=1 SV=1	460	20210911_zy_urine_ethcd_1.12672.12672.3	controllerType=0 controllerNumber=1 scan=12672	56.6572
10521:4	2	R.QDQC[+57.021]IYN[+2569.905]TTYLNVQR.E	HexNAc(5)Hex(6)NeuAc(2)	C[+57], N[+2570]	1121.95	4	4484.79	4485.8	-1	-2.5	87	Specific	467.82	311.57	311.57	7.49	53	>sp|P02763|A1AG1_HUMAN Alpha-1-acid glycoprotein 1 OS=Homo sapiens OX=9606 GN=ORM1 PE=1 SV=1	2208	20210911_zy_urine_ethcd_1.11544.11544.4	controllerType=0 controllerNumber=1 scan=11544	51.6268
05537:3	26	R.N[+2204.772]HSC[+57.021]SEGQISIFR.Y	HexNAc(4)Hex(5)NeuAc(2)	C[+57], N[+2205]	1247.16	3	3739.47	3739.48	0	-1.8	731	Specific	468.49	235.75	235.75	6.37	11	>sp|O75882|ATRN_HUMAN Attractin OS=Homo sapiens OX=9606 GN=ATRN PE=1 SV=2	8160	20210911_zy_urine_ethcd_1.6081.6081.3	controllerType=0 controllerNumber=1 scan=6081	27.2594
12558:4	4	R.QNQC[+57.021]FYN[+3007.058]SSYLNVQR.E	HexNAc(5)Hex(6)Fuc(1)NeuAc(3)	C[+57], N[+3007]	1232.73	4	4927.9	4927.92	0	-4.3	87	Specific	468.53	274.73	274.73	7.07	34	>sp|P19652|A1AG2_HUMAN Alpha-1-acid glycoprotein 2 OS=Homo sapiens OX=9606 GN=ORM2 PE=1 SV=2	4531	20210911_zy_urine_ethcd_1.13775.13775.4	controllerType=0 controllerNumber=1 scan=13775	61.5921
13313:3	70	K.VC[+57.021]QDC[+57.021]PLLAPLN[+2204.772]DTR.V	HexNAc(4)Hex(5)NeuAc(2)	C[+57]*2, N[+2205]	1326.21	3	3976.62	3976.62	0	0.2	145	Specific	468.65	307.17	307.17	4.87	1	>sp|P02765|FETUA_HUMAN Alpha-2-HS-glycoprotein OS=Homo sapiens OX=9606 GN=AHSG PE=1 SV=2	4627	20210911_zy_urine_ethcd_1.14601.14601.3	controllerType=0 controllerNumber=1 scan=14601	65.2298
08080:4	3	K.ELHHLQEQN[+2861.000]VSNAFLDK.G	HexNAc(5)Hex(6)NeuAc(3)	N[+2861]	1221.51	4	4883	4883	0	-0.4	754	Specific	470.17	392.69	392.69	7.19	26	>sp|P00450|CERU_HUMAN Ceruloplasmin OS=Homo sapiens OX=9606 GN=CP PE=1 SV=1	460	20210911_zy_urine_ethcd_1.8870.8870.4	controllerType=0 controllerNumber=1 scan=8870	39.7051
10129:3	27	R.N[+1378.476]ETQHEPYPLMLPGC[+57.021]SPSC[+57.021]PLER.F	HexNAc(2)Hex(6)	C[+57]*2, N[+1378]	1364.24	3	4090.69	4090.7	0	-1.2	333	Specific	470.8	371.35	158.18	8	13	>sp|P15309|PPAP_HUMAN Prostatic acid phosphatase OS=Homo sapiens OX=9606 GN=ACPP PE=1 SV=3	14195	20210911_zy_urine_ethcd_1.11115.11115.3	controllerType=0 controllerNumber=1 scan=11115	49.7351
11027:3	16	K.TAVN[+2350.830]C[+57.021]SSDFDAC[+57.021]LITK.A	HexNAc(4)Hex(5)Fuc(1)NeuAc(2)	C[+57]*2, N[+2351]	1384.88	3	4152.64	4152.64	0	-0.8	40	Specific	472.16	342.83	342.83	6.52	11	>sp|P13987|CD59_HUMAN CD59 glycoprotein OS=Homo sapiens OX=9606 GN=CD59 PE=1 SV=1	1116	20210911_zy_urine_ethcd_1.12098.12098.3	controllerType=0 controllerNumber=1 scan=12098	54.0863
06750:3	38	K.TVLTPATNHM[+15.995]GN[+1378.476]VTFTIPANR.E	HexNAc(2)Hex(6)	M[+16], N[+1378]	1217.21	3	3649.62	3649.63	0	-4.3	74	Specific	472.88	354.41	354.41	7.62	9	>sp|P01024|CO3_HUMAN Complement C3 OS=Homo sapiens OX=9606 GN=C3 PE=1 SV=2	731	20210911_zy_urine_ethcd_1.7413.7413.3	controllerType=0 controllerNumber=1 scan=7413	33.211
12693:3	9	K.C[+57.021]GLVPVLAENYN[+2204.772]K.S	HexNAc(4)Hex(5)NeuAc(2)	C[+57], N[+2205]	1227.84	3	3681.52	3681.52	0	-2.3	421	Specific	472.99	334.06	334.06	6.38	20	>sp|P02787|TRFE_HUMAN Serotransferrin OS=Homo sapiens OX=9606 GN=TF PE=1 SV=3	18223	20210911_zy_urine_ethcd_1.13923.13923.3	controllerType=0 controllerNumber=1 scan=13923	62.2417
12633:3	9	K.C[+57.021]GLVPVLAENYN[+2204.772]K.S	HexNAc(4)Hex(5)NeuAc(2)	C[+57], N[+2205]	1227.84	3	3681.52	3681.52	0	-1.9	421	Specific	473.29	324.65	324.65	6.52	20	>sp|P02787|TRFE_HUMAN Serotransferrin OS=Homo sapiens OX=9606 GN=TF PE=1 SV=3	18223	20210911_zy_urine_ethcd_1.13857.13857.3	controllerType=0 controllerNumber=1 scan=13857	61.9421
10448:3	2	R.QDQC[+57.021]IYN[+2715.963]TTYLNVQR.E	HexNAc(5)Hex(6)Fuc(1)NeuAc(2)	C[+57], N[+2716]	1544.62	3	4631.85	4631.86	0	-1.1	87	Specific	473.53	321.49	321.49	7.12	53	>sp|P02763|A1AG1_HUMAN Alpha-1-acid glycoprotein 1 OS=Homo sapiens OX=9606 GN=ORM1 PE=1 SV=1	2208	20210911_zy_urine_ethcd_1.11464.11464.3	controllerType=0 controllerNumber=1 scan=11464	51.2723
09949:3	4	R.QNQC[+57.021]FYN[+2935.037]SSYLNVQR.E	HexNAc(6)Hex(7)NeuAc(2)	C[+57], N[+2935]	1619.3	3	4855.89	4855.9	0	-1.9	87	Specific	474.7	323.32	323.32	7.31	34	>sp|P19652|A1AG2_HUMAN Alpha-1-acid glycoprotein 2 OS=Homo sapiens OX=9606 GN=ORM2 PE=1 SV=2	4531	20210911_zy_urine_ethcd_1.10918.10918.3	controllerType=0 controllerNumber=1 scan=10918	48.8616
02342:3	50	K.VTAC[+57.021]HSSQPN[+2204.772]ATLYK.M	HexNAc(4)Hex(5)NeuAc(2)	C[+57], N[+2205]	1294.53	3	3881.57	3881.58	0	-2.3	27	Specific	476.27	261.83	261.83	6.97	2	>sp|P05543|THBG_HUMAN Thyroxine-binding globulin OS=Homo sapiens OX=9606 GN=SERPINA7 PE=1 SV=2	13666	20210911_zy_urine_ethcd_1.2573.2573.3	controllerType=0 controllerNumber=1 scan=2573	11.5195
07832:3	15	R.GLTFQQN[+2262.814]ASSM[+15.995]C[+57.021]VPDQDTAIR.V	HexNAc(5)Hex(5)Fuc(1)NeuAc(1)	C[+57], M[+16], N[+2263]	1539.97	3	4617.88	4617.88	0	-0.7	203	Specific	477.21	338.56	90.15	7.3	12	>sp|P01871|IGHM_HUMAN Immunoglobulin heavy constant mu OS=Homo sapiens OX=9606 GN=IGHM PE=1 SV=4	10127	20210911_zy_urine_ethcd_1.8599.8599.3	controllerType=0 controllerNumber=1 scan=8599	38.504
14190:3	1	R.FALLM[+15.995]TNC[+57.021]YATPSSN[+2715.963]ATDPLK.Y	HexNAc(5)Hex(6)Fuc(1)NeuAc(2)	C[+57], M[+16], N[+2716]	1683.03	3	5047.06	5047.06	0	0.3	499	Specific	478.07	358.41	358.41	6.83	49	>sp|P07911|UROM_HUMAN Uromodulin OS=Homo sapiens OX=9606 GN=UMOD PE=1 SV=1	16609	20210911_zy_urine_ethcd_1.15559.15559.3	controllerType=0 controllerNumber=1 scan=15559	69.4117
10044:3	9	K.C[+57.021]GLVPVLAENYN[+1913.677]K.S	HexNAc(4)Hex(5)NeuAc(1)	C[+57], N[+1914]	1130.81	3	3390.42	3390.43	0	-1.8	421	Specific	478.28	322.27	322.27	6.52	20	>sp|P02787|TRFE_HUMAN Serotransferrin OS=Homo sapiens OX=9606 GN=TF PE=1 SV=3	18223	20210911_zy_urine_ethcd_1.11022.11022.3	controllerType=0 controllerNumber=1 scan=11022	49.3227
09873:3	4	R.QNQC[+57.021]FYN[+3081.095]SSYLNVQR.E	HexNAc(6)Hex(7)Fuc(1)NeuAc(2)	C[+57], N[+3081]	1667.99	3	5001.95	5001.96	0	-2.4	87	Specific	478.78	309.28	309.28	7.04	34	>sp|P19652|A1AG2_HUMAN Alpha-1-acid glycoprotein 2 OS=Homo sapiens OX=9606 GN=ORM2 PE=1 SV=2	4531	20210911_zy_urine_ethcd_1.10834.10834.3	controllerType=0 controllerNumber=1 scan=10834	48.4865
03867:3	23	R.LHEITN[+2204.772]ETFR.G	HexNAc(4)Hex(5)NeuAc(2)	N[+2205]	1155.47	3	3464.4	3464.41	0	-2.5	112	Specific	479.52	279.07	279.07	5.64	11	>sp|Q6EMK4|VASN_HUMAN Vasorin OS=Homo sapiens OX=9606 GN=VASN PE=1 SV=1	18175	20210911_zy_urine_ethcd_1.4249.4249.3	controllerType=0 controllerNumber=1 scan=4249	18.9916
05281:4	3	K.EHEGAIYPDN[+2350.830]TTDFQR.A	HexNAc(4)Hex(5)Fuc(1)NeuAc(2)	N[+2351]	1061.67	4	4243.66	4243.67	0	-2.9	129	Specific	483.02	339.75	37.27	6.71	26	>sp|P00450|CERU_HUMAN Ceruloplasmin OS=Homo sapiens OX=9606 GN=CP PE=1 SV=1	460	20210911_zy_urine_ethcd_1.5801.5801.4	controllerType=0 controllerNumber=1 scan=5801	26.0078
10278:3	2	R.QDQC[+57.021]IYN[+3081.095]TTYLNVQR.E	HexNAc(6)Hex(7)Fuc(1)NeuAc(2)	C[+57], N[+3081]	1666.33	3	4996.99	4996.99	0	-0.2	87	Specific	483.57	336.6	336.6	6.53	53	>sp|P02763|A1AG1_HUMAN Alpha-1-acid glycoprotein 1 OS=Homo sapiens OX=9606 GN=ORM1 PE=1 SV=1	2208	20210911_zy_urine_ethcd_1.11278.11278.3	controllerType=0 controllerNumber=1 scan=11278	50.4525
02178:3	6	K.HYTN[+2059.735]SSQDVTVPC[+57.021]R.V	HexNAc(4)Hex(5)Fuc(1)NeuAc(1)	C[+57], N[+2060]	1241.83	3	3723.48	3723.48	0	-1.7	89	Specific	486.47	297	297	6.17	32	>sp|P01877|IGHA2_HUMAN Immunoglobulin heavy constant alpha 2 OS=Homo sapiens OX=9606 GN=IGHA2 PE=1 SV=4	10403	20210911_zy_urine_ethcd_1.2394.2394.4	controllerType=0 controllerNumber=1 scan=2394	10.7565
11049:4	1	R.C[+57.021]NTAAPM[+15.995]WLN[+2861.000]GTHPSSDEGIVSR.K	HexNAc(5)Hex(6)NeuAc(3)	C[+57], M[+16], N[+2861]	1344.78	4	5376.12	5377.13	-1	-1.6	223	Specific	486.9	399.95	399.95	8.99	49	>sp|P07911|UROM_HUMAN Uromodulin OS=Homo sapiens OX=9606 GN=UMOD PE=1 SV=1	16609	20210911_zy_urine_ethcd_1.12122.12122.4	controllerType=0 controllerNumber=1 scan=12122	54.1911
01824:3	6	K.HYTN[+1971.719]SSQDVTVPC[+57.021]R.V	HexNAc(5)Hex(5)Fuc(1)	C[+57], N[+1972]	1212.49	3	3635.46	3635.47	0	-2.6	89	Specific	488.48	338.84	338.84	6.47	32	>sp|P01877|IGHA2_HUMAN Immunoglobulin heavy constant alpha 2 OS=Homo sapiens OX=9606 GN=IGHA2 PE=1 SV=4	10403	20210911_zy_urine_ethcd_1.2008.2008.3	controllerType=0 controllerNumber=1 scan=2008	9.164
01837:3	6	K.HYTN[+1647.613]SSQDVTVPC[+57.021]R.V	HexNAc(5)Hex(3)Fuc(1)	C[+57], N[+1648]	1104.46	3	3311.35	3311.36	0	-2.3	89	Specific	489.48	343.25	343.25	6.55	32	>sp|P01877|IGHA2_HUMAN Immunoglobulin heavy constant alpha 2 OS=Homo sapiens OX=9606 GN=IGHA2 PE=1 SV=4	10403	20210911_zy_urine_ethcd_1.2022.2022.3	controllerType=0 controllerNumber=1 scan=2022	9.2211
06630:3	3	K.ELHHLQEQN[+2204.772]VSNAFLDK.G	HexNAc(4)Hex(5)NeuAc(2)	N[+2205]	1409.6	3	4226.77	4226.78	0	-0.6	754	Specific	489.97	312.42	312.42	6.3	26	>sp|P00450|CERU_HUMAN Ceruloplasmin OS=Homo sapiens OX=9606 GN=CP PE=1 SV=1	460	20210911_zy_urine_ethcd_1.7280.7280.3	controllerType=0 controllerNumber=1 scan=7280	32.6233
08235:3	2	R.QDQC[+57.021]IYN[+2643.941]TTYLNVQR.E	HexNAc(6)Hex(7)NeuAc(1)	C[+57], N[+2644]	1520.62	3	4559.83	4559.84	0	-1.4	87	Specific	490.58	359.57	359.57	7.21	53	>sp|P02763|A1AG1_HUMAN Alpha-1-acid glycoprotein 1 OS=Homo sapiens OX=9606 GN=ORM1 PE=1 SV=1	2208	20210911_zy_urine_ethcd_1.9040.9040.3	controllerType=0 controllerNumber=1 scan=9040	40.4558
04446:4	5	K.NC[+57.021]HHSGSQVPLIHC[+57.021]N[+568.212]LTTPSPQNISNC[+57.021]R.Y	HexNAc(2)Hex(1)	C[+57]*3, N[+568]	949.927	4	3796.68	3796.7	0	-2.9	97	Specific	492.43	444.78	12.09	8.28	16	>sp|P10153|RNAS2_HUMAN Non-secretory ribonuclease OS=Homo sapiens OX=9606 GN=RNASE2 PE=1 SV=2	14694	20210911_zy_urine_ethcd_1.4884.4884.4	controllerType=0 controllerNumber=1 scan=4884	21.8703
05540:3	26	R.N[+2204.772]HSC[+57.021]SEGQISIFR.Y	HexNAc(4)Hex(5)NeuAc(2)	C[+57], N[+2205]	1247.16	3	3739.47	3739.48	0	-1.8	731	Specific	492.75	243.28	243.28	6.33	11	>sp|O75882|ATRN_HUMAN Attractin OS=Homo sapiens OX=9606 GN=ATRN PE=1 SV=2	8160	20210911_zy_urine_ethcd_1.6085.6085.3	controllerType=0 controllerNumber=1 scan=6085	27.2759
09918:3	9	K.C[+57.021]GLVPVLAENYN[+1913.677]K.S	HexNAc(4)Hex(5)NeuAc(1)	C[+57], N[+1914]	1130.81	3	3390.42	3390.43	0	-2.3	421	Specific	493.45	311.41	311.41	6.38	20	>sp|P02787|TRFE_HUMAN Serotransferrin OS=Homo sapiens OX=9606 GN=TF PE=1 SV=3	18223	20210911_zy_urine_ethcd_1.10884.10884.3	controllerType=0 controllerNumber=1 scan=10884	48.71
01784:4	10	K.TKPREEQFN[+1768.640]STFR.V	HexNAc(4)Hex(5)Fuc(1)	N[+1769]	852.867	4	3408.45	3408.46	0	-3.3	168	Specific	495	314.62	314.62	5.06	27	>sp|P01859|IGHG2_HUMAN Immunoglobulin heavy constant gamma 2 OS=Homo sapiens OX=9606 GN=IGHG2 PE=1 SV=2	2858	20210911_zy_urine_ethcd_1.1964.1964.4	controllerType=0 controllerNumber=1 scan=1964	8.9786
10532:3	2	R.QDQC[+57.021]IYN[+2715.963]TTYLNVQR.E	HexNAc(5)Hex(6)Fuc(1)NeuAc(2)	C[+57], N[+2716]	1544.62	3	4631.85	4631.86	0	-2.7	87	Specific	495.52	349.4	349.4	7.26	53	>sp|P02763|A1AG1_HUMAN Alpha-1-acid glycoprotein 1 OS=Homo sapiens OX=9606 GN=ORM1 PE=1 SV=1	2208	20210911_zy_urine_ethcd_1.11556.11556.3	controllerType=0 controllerNumber=1 scan=11556	51.6794
10619:3	2	R.QDQC[+57.021]IYN[+2569.905]TTYLNVQR.E	HexNAc(5)Hex(6)NeuAc(2)	C[+57], N[+2570]	1495.94	3	4485.8	4485.8	0	-0.8	87	Specific	496.16	352.91	352.91	7	53	>sp|P02763|A1AG1_HUMAN Alpha-1-acid glycoprotein 1 OS=Homo sapiens OX=9606 GN=ORM1 PE=1 SV=1	2208	20210911_zy_urine_ethcd_1.11651.11651.3	controllerType=0 controllerNumber=1 scan=11651	52.0996
05363:3	31	K.NYHQPAILN[+2262.814]SSALR.Q	HexNAc(5)Hex(5)Fuc(1)NeuAc(1)	N[+2263]	1282.88	3	3846.64	3846.64	0	-0.8	41	Specific	496.46	243.81	243.81	5.93	5	>sp|Q16769|QPCT_HUMAN Glutaminyl-peptide cyclotransferase OS=Homo sapiens OX=9606 GN=QPCT PE=1 SV=1	12985	20210911_zy_urine_ethcd_1.5891.5891.3	controllerType=0 controllerNumber=1 scan=5891	26.4143
02377:4	6	K.HYTN[+2553.910]SSQDVTVPC[+57.021]R.V	HexNAc(5)Hex(5)Fuc(1)NeuAc(2)	C[+57], N[+2554]	1054.91	4	4216.64	4217.66	-1	-4.5	89	Specific	496.59	339.51	339.51	6.44	32	>sp|P01877|IGHA2_HUMAN Immunoglobulin heavy constant alpha 2 OS=Homo sapiens OX=9606 GN=IGHA2 PE=1 SV=4	10403	20210911_zy_urine_ethcd_1.2611.2611.3	controllerType=0 controllerNumber=1 scan=2611	11.6897
04035:3	23	R.LHEITN[+2350.830]ETFR.G	HexNAc(4)Hex(5)Fuc(1)NeuAc(2)	N[+2351]	1204.16	3	3610.46	3610.47	0	-2.3	112	Specific	496.9	290.22	290.22	5.67	11	>sp|Q6EMK4|VASN_HUMAN Vasorin OS=Homo sapiens OX=9606 GN=VASN PE=1 SV=1	18175	20210911_zy_urine_ethcd_1.4433.4433.3	controllerType=0 controllerNumber=1 scan=4433	19.8324
13248:3	70	K.VC[+57.021]QDC[+57.021]PLLAPLN[+2204.772]DTR.V	HexNAc(4)Hex(5)NeuAc(2)	C[+57]*2, N[+2205]	1326.21	3	3976.61	3976.62	0	-1.5	145	Specific	497.16	314.4	314.4	5.64	1	>sp|P02765|FETUA_HUMAN Alpha-2-HS-glycoprotein OS=Homo sapiens OX=9606 GN=AHSG PE=1 SV=2	4627	20210911_zy_urine_ethcd_1.14530.14530.3	controllerType=0 controllerNumber=1 scan=14530	64.9222
12174:4	4	R.QNQC[+57.021]FYN[+3226.132]SSYLNVQR.E	HexNAc(6)Hex(7)NeuAc(3)	C[+57], N[+3226]	1287.5	4	5146.99	5147	0	-1.7	87	Specific	498.03	372.94	372.94	7.75	34	>sp|P19652|A1AG2_HUMAN Alpha-1-acid glycoprotein 2 OS=Homo sapiens OX=9606 GN=ORM2 PE=1 SV=2	4531	20210911_zy_urine_ethcd_1.13355.13355.4	controllerType=0 controllerNumber=1 scan=13355	59.7426
08649:3	1	R.C[+57.021]NTAAPMWLN[+1954.704]GTHPSSDEGIVSR.K	HexNAc(5)Hex(4)NeuAc(1)	C[+57], N[+1955]	1485.62	3	4454.83	4454.84	0	-1.2	223	Specific	499.44	360.02	206.47	7.94	49	>sp|P07911|UROM_HUMAN Uromodulin OS=Homo sapiens OX=9606 GN=UMOD PE=1 SV=1	16609	20210911_zy_urine_ethcd_1.9493.9493.3	controllerType=0 controllerNumber=1 scan=9493	42.4564
14938:4	1	R.FALLMTNC[+57.021]YATPSSN[+2350.830]ATDPLK.Y	HexNAc(4)Hex(5)Fuc(1)NeuAc(2)	C[+57], N[+2351]	1167.24	4	4665.92	4665.94	0	-2.3	499	Specific	499.7	415.77	60.65	8.92	49	>sp|P07911|UROM_HUMAN Uromodulin OS=Homo sapiens OX=9606 GN=UMOD PE=1 SV=1	16609	20210911_zy_urine_ethcd_1.16377.16377.4	controllerType=0 controllerNumber=1 scan=16377	73.0039
06090:4	5	K.NC[+57.021]HHSGSQVPLIHC[+57.021]N[+2204.772]LTTPSPQNISNC[+57.021]R.Y	HexNAc(4)Hex(5)NeuAc(2)	C[+57]*3, N[+2205]	1359.07	4	5433.27	5433.26	0	2.3	97	Specific	500.51	418.69	85.53	8.1	16	>sp|P10153|RNAS2_HUMAN Non-secretory ribonuclease OS=Homo sapiens OX=9606 GN=RNASE2 PE=1 SV=2	14694	20210911_zy_urine_ethcd_1.6688.6688.4	controllerType=0 controllerNumber=1 scan=6688	29.9953
02841:3	23	R.LHEITN[+2424.867]ETFR.G	HexNAc(5)Hex(6)Fuc(1)NeuAc(1)	N[+2425]	1228.84	3	3684.5	3684.51	0	-1.9	112	Specific	501.2	252.33	252.33	5.98	11	>sp|Q6EMK4|VASN_HUMAN Vasorin OS=Homo sapiens OX=9606 GN=VASN PE=1 SV=1	18175	20210911_zy_urine_ethcd_1.3121.3121.3	controllerType=0 controllerNumber=1 scan=3121	13.9213
09037:3	8	K.DIVEYYNDSN[+2350.830]GSHVLQGR.F	HexNAc(4)Hex(5)Fuc(1)NeuAc(2)	N[+2351]	1472.93	3	4416.78	4416.79	0	-1.5	103	Specific	501.49	342.45	66.73	7.42	33	>sp|P25311|ZA2G_HUMAN Zinc-alpha-2-glycoprotein OS=Homo sapiens OX=9606 GN=AZGP1 PE=1 SV=2	18783	20210911_zy_urine_ethcd_1.9919.9919.3	controllerType=0 controllerNumber=1 scan=9919	44.3847
03969:3	3	K.EHEGAIYPDN[+2059.735]TTDFQR.A	HexNAc(4)Hex(5)Fuc(1)NeuAc(1)	N[+2060]	1318.19	3	3952.57	3952.58	0	-2.1	129	Specific	501.61	302.32	302.32	6.98	26	>sp|P00450|CERU_HUMAN Ceruloplasmin OS=Homo sapiens OX=9606 GN=CP PE=1 SV=1	460	20210911_zy_urine_ethcd_1.4361.4361.3	controllerType=0 controllerNumber=1 scan=4361	19.5003
09940:3	7	R.ADGTVNQIEGEATPVN[+2059.735]LTEPAK.L	HexNAc(4)Hex(5)Fuc(1)NeuAc(1)	N[+2060]	1438.62	3	4313.85	4313.85	0	-1	83	Specific	502.56	387.24	387.24	8.55	25	>sp|P05090|APOD_HUMAN Apolipoprotein D OS=Homo sapiens OX=9606 GN=APOD PE=1 SV=1	120	20210911_zy_urine_ethcd_1.10908.10908.3	controllerType=0 controllerNumber=1 scan=10908	48.8164
03572:3	13	K.WN[+1913.677]NTGC[+57.021]QALPSQDEGPSK.A	HexNAc(4)Hex(5)NeuAc(1)	C[+57], N[+1914]	1301.52	3	3902.55	3902.55	0	-1.5	498	Specific	502.84	359.22	359.22	7.33	16	>sp|P01833|PIGR_HUMAN Polymeric immunoglobulin receptor OS=Homo sapiens OX=9606 GN=PIGR PE=1 SV=4	10083	20210911_zy_urine_ethcd_1.3925.3925.3	controllerType=0 controllerNumber=1 scan=3925	17.5293
06960:3	53	R.HLYTTTGGETDFTN[+2026.687]VTSLR.G	HexNAc(2)Hex(10)	N[+2027]	1380.57	3	4139.69	4139.71	0	-4.5	393	Specific	503.01	364.19	364.19	6.9	3	>sp|Q99523|SORT_HUMAN Sortilin OS=Homo sapiens OX=9606 GN=SORT1 PE=1 SV=3	15998	20210911_zy_urine_ethcd_1.7644.7644.3	controllerType=0 controllerNumber=1 scan=7644	34.2427
12686:3	9	K.C[+57.021]GLVPVLAENYN[+1913.677]K.S	HexNAc(4)Hex(5)NeuAc(1)	C[+57], N[+1914]	1130.81	3	3390.43	3390.43	0	0.1	421	Specific	503.12	328.89	328.89	5.94	20	>sp|P02787|TRFE_HUMAN Serotransferrin OS=Homo sapiens OX=9606 GN=TF PE=1 SV=3	18223	20210911_zy_urine_ethcd_1.13915.13915.3	controllerType=0 controllerNumber=1 scan=13915	62.2062
14744:4	9	R.QQQHLFGSN[+2861.000]VTDC[+57.021]SGNFC[+57.021]LFR.S	HexNAc(5)Hex(6)NeuAc(3)	C[+57]*2, N[+2861]	1344.78	4	5376.11	5376.12	0	-3.1	622	Specific	503.38	400.41	400.41	8.58	20	>sp|P02787|TRFE_HUMAN Serotransferrin OS=Homo sapiens OX=9606 GN=TF PE=1 SV=3	18223	20210911_zy_urine_ethcd_1.16164.16164.4	controllerType=0 controllerNumber=1 scan=16164	72.0701
07874:3	15	R.GLTFQQN[+2059.735]ASSM[+15.995]C[+57.021]VPDQDTAIR.V	HexNAc(4)Hex(5)Fuc(1)NeuAc(1)	C[+57], M[+16], N[+2060]	1471.94	3	4413.81	4414.81	-1	1	203	Specific	504.47	348.28	74.79	7.23	12	>sp|P01871|IGHM_HUMAN Immunoglobulin heavy constant mu OS=Homo sapiens OX=9606 GN=IGHM PE=1 SV=4	10127	20210911_zy_urine_ethcd_1.8645.8645.3	controllerType=0 controllerNumber=1 scan=8645	38.7076
12317:4	4	R.QNQC[+57.021]FYN[+3372.190]SSYLNVQR.E	HexNAc(6)Hex(7)Fuc(1)NeuAc(3)	C[+57], N[+3372]	1323.77	4	5292.06	5293.06	-1	1.2	87	Specific	505.02	333.52	333.52	7.05	34	>sp|P19652|A1AG2_HUMAN Alpha-1-acid glycoprotein 2 OS=Homo sapiens OX=9606 GN=ORM2 PE=1 SV=2	4531	20210911_zy_urine_ethcd_1.13511.13511.4	controllerType=0 controllerNumber=1 scan=13511	60.4284
08535:3	2	R.QDQC[+57.021]IYN[+1913.677]TTYLNVQR.E	HexNAc(4)Hex(5)NeuAc(1)	C[+57], N[+1914]	1277.19	3	3829.57	3829.57	0	-1.4	87	Specific	507.46	337.76	337.76	7.32	53	>sp|P02763|A1AG1_HUMAN Alpha-1-acid glycoprotein 1 OS=Homo sapiens OX=9606 GN=ORM1 PE=1 SV=1	2208	20210911_zy_urine_ethcd_1.9368.9368.3	controllerType=0 controllerNumber=1 scan=9368	41.8952
11562:4	7	R.ADGTVNQIEGEATPVN[+3081.095]LTEPAK.L	HexNAc(6)Hex(7)Fuc(1)NeuAc(2)	N[+3081]	1334.56	4	5335.24	5335.21	0	4.2	83	Specific	509.41	401.55	401.55	7.95	25	>sp|P05090|APOD_HUMAN Apolipoprotein D OS=Homo sapiens OX=9606 GN=APOD PE=1 SV=1	120	20210911_zy_urine_ethcd_1.12684.12684.4	controllerType=0 controllerNumber=1 scan=12684	56.7105
10460:3	2	R.QDQC[+57.021]IYN[+2569.905]TTYLNVQR.E	HexNAc(5)Hex(6)NeuAc(2)	C[+57], N[+2570]	1495.94	3	4485.8	4485.8	0	-1.1	87	Specific	509.43	372.79	372.79	7.47	53	>sp|P02763|A1AG1_HUMAN Alpha-1-acid glycoprotein 1 OS=Homo sapiens OX=9606 GN=ORM1 PE=1 SV=1	2208	20210911_zy_urine_ethcd_1.11477.11477.3	controllerType=0 controllerNumber=1 scan=11477	51.3306
12315:4	28	R.C[+57.021]LNWLDAQSGLASAPVSGAGN[+2059.735]HSYC[+57.021]R.N	HexNAc(4)Hex(5)Fuc(1)NeuAc(1)	C[+57]*2, N[+2060]	1213.5	4	4850.99	4851	0	-2.8	46	Specific	509.46	412.66	412.66	8.6	4	>sp|Q96FE7|P3IP1_HUMAN Phosphoinositide-3-kinase-interacting protein 1 OS=Homo sapiens OX=9606 GN=PIK3IP1 PE=1 SV=2	11936	20210911_zy_urine_ethcd_1.13509.13509.4	controllerType=0 controllerNumber=1 scan=13509	60.4199
05533:3	51	R.FSDGLESN[+1864.634]SSTQFEVK.K	HexNAc(2)Hex(9)	N[+1865]	1213.82	3	3639.44	3639.45	0	-2.3	219	Specific	510.19	415.39	415.39	8.09	2	>sp|P0C0L5|CO4B_HUMAN Complement C4-B OS=Homo sapiens OX=9606 GN=C4B PE=1 SV=2	4060	20210911_zy_urine_ethcd_1.6077.6077.3	controllerType=0 controllerNumber=1 scan=6077	27.2406
10066:3	4	R.QNQC[+57.021]FYN[+2715.963]SSYLNVQR.E	HexNAc(5)Hex(6)Fuc(1)NeuAc(2)	C[+57], N[+2716]	1546.28	3	4636.82	4636.83	0	-1.5	87	Specific	510.71	324	324	7.32	34	>sp|P19652|A1AG2_HUMAN Alpha-1-acid glycoprotein 2 OS=Homo sapiens OX=9606 GN=ORM2 PE=1 SV=2	4531	20210911_zy_urine_ethcd_1.11046.11046.3	controllerType=0 controllerNumber=1 scan=11046	49.4276
13937:3	3	K.AGLQAFFQVQEC[+57.021]N[+2204.772]K.S	HexNAc(4)Hex(5)NeuAc(2)	C[+57], N[+2205]	1282.19	3	3844.56	3844.56	0	-1.7	346	Specific	510.93	336.57	336.57	6.72	26	>sp|P00450|CERU_HUMAN Ceruloplasmin OS=Homo sapiens OX=9606 GN=CP PE=1 SV=1	460	20210911_zy_urine_ethcd_1.15283.15283.3	controllerType=0 controllerNumber=1 scan=15283	68.218
10001:3	4	R.QNQC[+57.021]FYN[+2715.963]SSYLNVQR.E	HexNAc(5)Hex(6)Fuc(1)NeuAc(2)	C[+57], N[+2716]	1546.28	3	4636.82	4636.83	0	-1.3	87	Specific	511.26	342.46	342.46	7.41	34	>sp|P19652|A1AG2_HUMAN Alpha-1-acid glycoprotein 2 OS=Homo sapiens OX=9606 GN=ORM2 PE=1 SV=2	4531	20210911_zy_urine_ethcd_1.10975.10975.3	controllerType=0 controllerNumber=1 scan=10975	49.1153
04480:4	11	R.YPHKPEIN[+1913.677]STTHPGADLQENFC[+57.021]R.N	HexNAc(4)Hex(5)NeuAc(1)	C[+57], N[+1914]	1156.99	4	4624.92	4624.94	0	-4	136	Specific	511.53	391.52	391.52	9.07	13	>sp|P00734|THRB_HUMAN Prothrombin OS=Homo sapiens OX=9606 GN=F2 PE=1 SV=2	18404	20210911_zy_urine_ethcd_1.4922.4922.4	controllerType=0 controllerNumber=1 scan=4922	22.0349
12314:3	4	R.QNQC[+57.021]FYN[+3226.132]SSYLNVQR.E	HexNAc(6)Hex(7)NeuAc(3)	C[+57], N[+3226]	1716.34	3	5146.99	5147	0	-1	87	Specific	512.44	359.68	359.68	7.19	34	>sp|P19652|A1AG2_HUMAN Alpha-1-acid glycoprotein 2 OS=Homo sapiens OX=9606 GN=ORM2 PE=1 SV=2	4531	20210911_zy_urine_ethcd_1.13508.13508.3	controllerType=0 controllerNumber=1 scan=13508	60.4148
10373:3	2	R.QDQC[+57.021]IYN[+2715.963]TTYLNVQR.E	HexNAc(5)Hex(6)Fuc(1)NeuAc(2)	C[+57], N[+2716]	1544.62	3	4631.86	4631.86	0	-0.3	87	Specific	512.77	354.37	354.37	6.81	53	>sp|P02763|A1AG1_HUMAN Alpha-1-acid glycoprotein 1 OS=Homo sapiens OX=9606 GN=ORM1 PE=1 SV=1	2208	20210911_zy_urine_ethcd_1.11382.11382.3	controllerType=0 controllerNumber=1 scan=11382	50.9127
04041:3	23	R.LHEITN[+2350.830]ETFR.G	HexNAc(4)Hex(5)Fuc(1)NeuAc(2)	N[+2351]	1204.16	3	3610.46	3610.47	0	-1.9	112	Specific	513.48	299.07	299.07	6	11	>sp|Q6EMK4|VASN_HUMAN Vasorin OS=Homo sapiens OX=9606 GN=VASN PE=1 SV=1	18175	20210911_zy_urine_ethcd_1.4440.4440.3	controllerType=0 controllerNumber=1 scan=4440	19.862
13666:4	28	R.C[+57.021]LNWLDAQSGLASAPVSGAGN[+2350.830]HSYC[+57.021]R.N	HexNAc(4)Hex(5)Fuc(1)NeuAc(2)	C[+57]*2, N[+2351]	1286.28	4	5142.09	5142.1	0	-1.6	46	Specific	514.31	430.08	78.22	8.55	4	>sp|Q96FE7|P3IP1_HUMAN Phosphoinositide-3-kinase-interacting protein 1 OS=Homo sapiens OX=9606 GN=PIK3IP1 PE=1 SV=2	11936	20210911_zy_urine_ethcd_1.14987.14987.4	controllerType=0 controllerNumber=1 scan=14987	66.9328
12707:3	2	R.QDQC[+57.021]IYN[+2861.000]TTYLNVQR.E	HexNAc(5)Hex(6)NeuAc(3)	C[+57], N[+2861]	1592.97	3	4776.89	4776.9	0	-2.2	87	Specific	515.17	365.5	365.5	7.66	53	>sp|P02763|A1AG1_HUMAN Alpha-1-acid glycoprotein 1 OS=Homo sapiens OX=9606 GN=ORM1 PE=1 SV=1	2208	20210911_zy_urine_ethcd_1.13938.13938.3	controllerType=0 controllerNumber=1 scan=13938	62.3095
04466:5	11	R.SRYPHKPEIN[+2204.772]STTHPGADLQENFC[+57.021]R.N	HexNAc(4)Hex(5)NeuAc(2)	C[+57], N[+2205]	1032.64	5	5159.16	5159.17	0	-1.3	134	Specific	517.27	451.52	451.52	7.62	13	>sp|P00734|THRB_HUMAN Prothrombin OS=Homo sapiens OX=9606 GN=F2 PE=1 SV=2	18404	20210911_zy_urine_ethcd_1.4906.4906.3	controllerType=0 controllerNumber=1 scan=4906	21.9675
06756:3	38	K.TVLTPATNHM[+15.995]GN[+1378.476]VTFTIPANR.E	HexNAc(2)Hex(6)	M[+16], N[+1378]	1217.21	3	3649.63	3649.63	0	-0.6	74	Specific	518.03	337.46	337.46	7.58	9	>sp|P01024|CO3_HUMAN Complement C3 OS=Homo sapiens OX=9606 GN=C3 PE=1 SV=2	731	20210911_zy_urine_ethcd_1.7420.7420.3	controllerType=0 controllerNumber=1 scan=7420	33.242
13928:4	2	R.QDQC[+57.021]IYN[+3663.286]TTYLNVQR.E	HexNAc(6)Hex(7)Fuc(1)NeuAc(4)	C[+57], N[+3663]	1395.55	4	5579.17	5579.18	0	-1.7	87	Specific	518.72	388.27	388.27	8.85	53	>sp|P02763|A1AG1_HUMAN Alpha-1-acid glycoprotein 1 OS=Homo sapiens OX=9606 GN=ORM1 PE=1 SV=1	2208	20210911_zy_urine_ethcd_1.15273.15273.4	controllerType=0 controllerNumber=1 scan=15273	68.1755
11944:3	7	R.ADGTVNQIEGEATPVN[+2350.830]LTEPAK.L	HexNAc(4)Hex(5)Fuc(1)NeuAc(2)	N[+2351]	1535.65	3	4604.95	4604.95	0	-0.3	83	Specific	523.29	402.68	402.68	8.13	25	>sp|P05090|APOD_HUMAN Apolipoprotein D OS=Homo sapiens OX=9606 GN=APOD PE=1 SV=1	120	20210911_zy_urine_ethcd_1.13103.13103.3	controllerType=0 controllerNumber=1 scan=13103	58.6223
10071:3	4	R.QNQC[+57.021]FYN[+2569.905]SSYLNVQR.E	HexNAc(5)Hex(6)NeuAc(2)	C[+57], N[+2570]	1497.6	3	4490.77	4490.77	0	0.2	87	Specific	525.16	346.22	346.22	6.6	34	>sp|P19652|A1AG2_HUMAN Alpha-1-acid glycoprotein 2 OS=Homo sapiens OX=9606 GN=ORM2 PE=1 SV=2	4531	20210911_zy_urine_ethcd_1.11051.11051.3	controllerType=0 controllerNumber=1 scan=11051	49.4511
12257:4	4	R.QNQC[+57.021]FYN[+3372.190]SSYLNVQR.E	HexNAc(6)Hex(7)Fuc(1)NeuAc(3)	C[+57], N[+3372]	1323.77	4	5292.06	5293.06	-1	0.8	87	Specific	528.71	335.58	335.58	7.01	34	>sp|P19652|A1AG2_HUMAN Alpha-1-acid glycoprotein 2 OS=Homo sapiens OX=9606 GN=ORM2 PE=1 SV=2	4531	20210911_zy_urine_ethcd_1.13445.13445.4	controllerType=0 controllerNumber=1 scan=13445	60.1399
10507:4	1	R.C[+57.021]NTAAPMWLN[+2553.910]GTHPSSDEGIVSR.K	HexNAc(5)Hex(5)Fuc(1)NeuAc(2)	C[+57], N[+2554]	1264.27	4	5054.06	5054.04	0	3.2	223	Specific	529.1	433.25	433.25	8	49	>sp|P07911|UROM_HUMAN Uromodulin OS=Homo sapiens OX=9606 GN=UMOD PE=1 SV=1	16609	20210911_zy_urine_ethcd_1.11528.11528.4	controllerType=0 controllerNumber=1 scan=11528	51.5573
05456:4	5	K.NC[+57.021]HHSGSQVPLIHC[+57.021]N[+876.322]LTTPSPQN[+203.079]ISNC[+57.021]R.Y	HexNAc(2)Hex(2)Fuc(1),HexNAc(1)	C[+57]*3, N[+203][+876]	1077.72	4	4307.86	4307.89	0	-5.8	97	Specific	529.54	500.43	100.11	8.7	16	>sp|P10153|RNAS2_HUMAN Non-secretory ribonuclease OS=Homo sapiens OX=9606 GN=RNASE2 PE=1 SV=2	14694	20210911_zy_urine_ethcd_1.5993.5993.4	controllerType=0 controllerNumber=1 scan=5993	26.8683
06163:4	5	K.NC[+57.021]HHSGSQVPLIHC[+57.021]N[+2204.772]LTTPSPQNISNC[+57.021]R.Y	HexNAc(4)Hex(5)NeuAc(2)	C[+57]*3, N[+2205]	1359.32	4	5434.27	5433.26	1	1.7	97	Specific	530.06	446.05	35.84	8.13	16	>sp|P10153|RNAS2_HUMAN Non-secretory ribonuclease OS=Homo sapiens OX=9606 GN=RNASE2 PE=1 SV=2	14694	20210911_zy_urine_ethcd_1.6768.6768.4	controllerType=0 controllerNumber=1 scan=6768	30.355
13866:4	2	R.QDQC[+57.021]IYN[+4028.418]TTYLNVQR.E	HexNAc(7)Hex(8)Fuc(1)NeuAc(4)	C[+57], N[+4028]	1486.83	4	5944.31	5944.31	0	-0.5	87	Specific	530.52	400.31	400.31	8.41	53	>sp|P02763|A1AG1_HUMAN Alpha-1-acid glycoprotein 1 OS=Homo sapiens OX=9606 GN=ORM1 PE=1 SV=1	2208	20210911_zy_urine_ethcd_1.15205.15205.4	controllerType=0 controllerNumber=1 scan=15205	67.8813
07007:4	3	K.EHEGAIYPDN[+3007.058]TTDFQR.A	HexNAc(5)Hex(6)Fuc(1)NeuAc(3)	N[+3007]	1225.73	4	4899.89	4899.9	0	-1.5	129	Specific	531.2	394.15	394.15	7.86	26	>sp|P00450|CERU_HUMAN Ceruloplasmin OS=Homo sapiens OX=9606 GN=CP PE=1 SV=1	460	20210911_zy_urine_ethcd_1.7695.7695.4	controllerType=0 controllerNumber=1 scan=7695	34.4683
15084:3	9	R.QQQHLFGSN[+2188.740]VTDC[+57.021]SGNFC[+57.021]LFR.S	HexNAc(2)Hex(11)	C[+57]*2, N[+2189]	1568.29	3	4702.86	4703.86	-1	0.5	622	Specific	532.6	391.54	391.54	8.2	20	>sp|P02787|TRFE_HUMAN Serotransferrin OS=Homo sapiens OX=9606 GN=TF PE=1 SV=3	18223	20210911_zy_urine_ethcd_1.16537.16537.3	controllerType=0 controllerNumber=1 scan=16537	73.7128
12164:4	2	R.QDQC[+57.021]IYN[+3737.322]TTYLNVQR.E	HexNAc(7)Hex(8)Fuc(1)NeuAc(3)	C[+57], N[+3737]	1414.06	4	5653.2	5653.22	0	-3	87	Specific	535.78	385.17	385.17	8.43	53	>sp|P02763|A1AG1_HUMAN Alpha-1-acid glycoprotein 1 OS=Homo sapiens OX=9606 GN=ORM1 PE=1 SV=1	2208	20210911_zy_urine_ethcd_1.13344.13344.4	controllerType=0 controllerNumber=1 scan=13344	59.6955
08955:3	8	K.DIVEYYNDSN[+2204.772]GSHVLQGR.F	HexNAc(4)Hex(5)NeuAc(2)	N[+2205]	1423.91	3	4269.72	4270.73	-1	-0.8	103	Specific	536.99	304.09	44.37	7.1	33	>sp|P25311|ZA2G_HUMAN Zinc-alpha-2-glycoprotein OS=Homo sapiens OX=9606 GN=AZGP1 PE=1 SV=2	18783	20210911_zy_urine_ethcd_1.9829.9829.3	controllerType=0 controllerNumber=1 scan=9829	43.9808
04398:4	11	R.YPHKPEIN[+1913.677]STTHPGADLQENFC[+57.021]R.N	HexNAc(4)Hex(5)NeuAc(1)	C[+57], N[+1914]	1156.99	4	4624.93	4624.94	0	-1.3	136	Specific	538.29	444.13	444.13	8.97	13	>sp|P00734|THRB_HUMAN Prothrombin OS=Homo sapiens OX=9606 GN=F2 PE=1 SV=2	18404	20210911_zy_urine_ethcd_1.4832.4832.4	controllerType=0 controllerNumber=1 scan=4832	21.6375
02037:3	6	K.HYTN[+2424.867]SSQDVTVPC[+57.021]R.V	HexNAc(5)Hex(6)Fuc(1)NeuAc(1)	C[+57], N[+2425]	1363.54	3	4088.61	4088.62	0	-0.9	89	Specific	538.42	350.02	350.02	6.44	32	>sp|P01877|IGHA2_HUMAN Immunoglobulin heavy constant alpha 2 OS=Homo sapiens OX=9606 GN=IGHA2 PE=1 SV=4	10403	20210911_zy_urine_ethcd_1.2240.2240.3	controllerType=0 controllerNumber=1 scan=2240	10.1104
14046:4	2	R.QDQC[+57.021]IYN[+3663.286]TTYLNVQR.E	HexNAc(6)Hex(7)Fuc(1)NeuAc(4)	C[+57], N[+3663]	1395.55	4	5579.18	5579.18	0	-1.1	87	Specific	544.52	401.11	401.11	8.76	53	>sp|P02763|A1AG1_HUMAN Alpha-1-acid glycoprotein 1 OS=Homo sapiens OX=9606 GN=ORM1 PE=1 SV=1	2208	20210911_zy_urine_ethcd_1.15402.15402.4	controllerType=0 controllerNumber=1 scan=15402	68.7346
10128:3	4	R.QNQC[+57.021]FYN[+2569.905]SSYLNVQR.E	HexNAc(5)Hex(6)NeuAc(2)	C[+57], N[+2570]	1497.59	3	4490.77	4490.77	0	-0.3	87	Specific	544.62	383.89	383.89	7.87	34	>sp|P19652|A1AG2_HUMAN Alpha-1-acid glycoprotein 2 OS=Homo sapiens OX=9606 GN=ORM2 PE=1 SV=2	4531	20210911_zy_urine_ethcd_1.11114.11114.3	controllerType=0 controllerNumber=1 scan=11114	49.7299
09133:3	8	K.DIVEYYNDSN[+2204.772]GSHVLQGR.F	HexNAc(4)Hex(5)NeuAc(2)	N[+2205]	1424.24	3	4270.72	4270.73	0	-2.2	103	Specific	544.66	394	69.68	8.53	33	>sp|P25311|ZA2G_HUMAN Zinc-alpha-2-glycoprotein OS=Homo sapiens OX=9606 GN=AZGP1 PE=1 SV=2	18783	20210911_zy_urine_ethcd_1.10024.10024.3	controllerType=0 controllerNumber=1 scan=10024	44.85
10723:3	1	R.C[+57.021]NTAAPMWLN[+2245.799]GTHPSSDEGIVSR.K	HexNAc(5)Hex(4)NeuAc(2)	C[+57], N[+2246]	1582.65	3	4745.93	4745.93	0	-1.2	223	Specific	545.12	388.1	388.1	9.2	49	>sp|P07911|UROM_HUMAN Uromodulin OS=Homo sapiens OX=9606 GN=UMOD PE=1 SV=1	16609	20210911_zy_urine_ethcd_1.11765.11765.3	controllerType=0 controllerNumber=1 scan=11765	52.6061
06777:3	38	K.TVLTPATNHM[+15.995]GN[+1378.476]VTFTIPANR.E	HexNAc(2)Hex(6)	M[+16], N[+1378]	1217.21	3	3649.62	3649.63	0	-2.1	74	Specific	548.68	371.24	371.24	8.23	9	>sp|P01024|CO3_HUMAN Complement C3 OS=Homo sapiens OX=9606 GN=C3 PE=1 SV=2	731	20210911_zy_urine_ethcd_1.7443.7443.3	controllerType=0 controllerNumber=1 scan=7443	33.345
05342:3	31	K.NYHQPAILN[+2059.735]SSALR.Q	HexNAc(4)Hex(5)Fuc(1)NeuAc(1)	N[+2060]	1215.19	3	3643.56	3643.56	0	-2.1	41	Specific	548.69	272.78	272.78	6.61	5	>sp|Q16769|QPCT_HUMAN Glutaminyl-peptide cyclotransferase OS=Homo sapiens OX=9606 GN=QPCT PE=1 SV=1	12985	20210911_zy_urine_ethcd_1.5868.5868.3	controllerType=0 controllerNumber=1 scan=5868	26.3111
10721:3	1	R.C[+57.021]NTAAPMWLN[+2245.799]GTHPSSDEGIVSR.K	HexNAc(5)Hex(4)NeuAc(2)	C[+57], N[+2246]	1582.65	3	4745.93	4745.93	0	-0.7	223	Specific	549.62	410.54	410.54	8.98	49	>sp|P07911|UROM_HUMAN Uromodulin OS=Homo sapiens OX=9606 GN=UMOD PE=1 SV=1	16609	20210911_zy_urine_ethcd_1.11762.11762.3	controllerType=0 controllerNumber=1 scan=11762	52.5945
10275:4	2	R.QDQC[+57.021]IYN[+2935.037]TTYLNVQR.E	HexNAc(6)Hex(7)NeuAc(2)	C[+57], N[+2935]	1213.49	4	4850.93	4850.93	0	-1.6	87	Specific	551.28	410.84	410.84	8.76	53	>sp|P02763|A1AG1_HUMAN Alpha-1-acid glycoprotein 1 OS=Homo sapiens OX=9606 GN=ORM1 PE=1 SV=1	2208	20210911_zy_urine_ethcd_1.11274.11274.4	controllerType=0 controllerNumber=1 scan=11274	50.4366
13403:4	3	K.EN[+2350.830]LTAPGSDSAVFFEQGTTR.I	HexNAc(4)Hex(5)Fuc(1)NeuAc(2)	N[+2351]	1120.21	4	4477.82	4477.83	0	-1.9	396	Specific	551.93	396.67	396.67	8.35	26	>sp|P00450|CERU_HUMAN Ceruloplasmin OS=Homo sapiens OX=9606 GN=CP PE=1 SV=1	460	20210911_zy_urine_ethcd_1.14699.14699.4	controllerType=0 controllerNumber=1 scan=14699	65.6589
10762:3	15	R.GLTFQQN[+2262.814]ASSMC[+57.021]VPDQDTAIR.V	HexNAc(5)Hex(5)Fuc(1)NeuAc(1)	C[+57], N[+2263]	1534.64	3	4601.9	4601.89	0	2.2	203	Specific	552.23	412.02	412.02	8	12	>sp|P01871|IGHM_HUMAN Immunoglobulin heavy constant mu OS=Homo sapiens OX=9606 GN=IGHM PE=1 SV=4	10127	20210911_zy_urine_ethcd_1.11807.11807.3	controllerType=0 controllerNumber=1 scan=11807	52.7948
06108:4	5	K.NC[+57.021]HHSGSQVPLIHC[+57.021]N[+2204.772]LTTPSPQNISNC[+57.021]R.Y	HexNAc(4)Hex(5)NeuAc(2)	C[+57]*3, N[+2205]	1359.32	4	5434.27	5433.26	1	1.6	97	Specific	553.29	453.64	104.46	8.26	16	>sp|P10153|RNAS2_HUMAN Non-secretory ribonuclease OS=Homo sapiens OX=9606 GN=RNASE2 PE=1 SV=2	14694	20210911_zy_urine_ethcd_1.6708.6708.4	controllerType=0 controllerNumber=1 scan=6708	30.0891
15043:4	1	R.FALLM[+15.995]TNC[+57.021]YATPSSN[+3210.137]ATDPLK.Y	HexNAc(6)Hex(6)Fuc(1)NeuAc(3)	C[+57], M[+16], N[+3210]	1385.81	4	5540.22	5541.24	-1	-2.2	499	Specific	556.32	465.83	332	9.5	49	>sp|P07911|UROM_HUMAN Uromodulin OS=Homo sapiens OX=9606 GN=UMOD PE=1 SV=1	16609	20210911_zy_urine_ethcd_1.16492.16492.4	controllerType=0 controllerNumber=1 scan=16492	73.5119
13882:4	4	R.QNQC[+57.021]FYN[+3663.286]SSYLNVQR.E	HexNAc(6)Hex(7)Fuc(1)NeuAc(4)	C[+57], N[+3663]	1396.54	4	5583.14	5584.15	-1	-0.9	87	Specific	556.6	348.8	348.8	7.74	34	>sp|P19652|A1AG2_HUMAN Alpha-1-acid glycoprotein 2 OS=Homo sapiens OX=9606 GN=ORM2 PE=1 SV=2	4531	20210911_zy_urine_ethcd_1.15223.15223.4	controllerType=0 controllerNumber=1 scan=15223	67.9602
02033:3	6	K.HYTN[+2262.814]SSQDVTVPC[+57.021]R.V	HexNAc(5)Hex(5)Fuc(1)NeuAc(1)	C[+57], N[+2263]	1309.52	3	3926.56	3926.56	0	-1.7	89	Specific	557.73	338.05	338.05	6.89	32	>sp|P01877|IGHA2_HUMAN Immunoglobulin heavy constant alpha 2 OS=Homo sapiens OX=9606 GN=IGHA2 PE=1 SV=4	10403	20210911_zy_urine_ethcd_1.2236.2236.3	controllerType=0 controllerNumber=1 scan=2236	10.0953
08088:4	3	K.ELHHLQEQN[+2861.000]VSNAFLDK.G	HexNAc(5)Hex(6)NeuAc(3)	N[+2861]	1221.5	4	4882.99	4883	0	-2	754	Specific	558.12	455.65	455.65	8.27	26	>sp|P00450|CERU_HUMAN Ceruloplasmin OS=Homo sapiens OX=9606 GN=CP PE=1 SV=1	460	20210911_zy_urine_ethcd_1.8879.8879.4	controllerType=0 controllerNumber=1 scan=8879	39.7439
06046:4	5	K.NC[+57.021]HHSGSQVPLIHC[+57.021]N[+349.137]LTTPSPQN[+203.079]ISNC[+57.021]R.Y	HexNAc(1)Fuc(1),HexNAc(1)	C[+57]*3, N[+203][+349]	945.927	4	3780.68	3780.7	0	-4.3	97	Specific	559.31	559.31	54.99	8.54	16	>sp|P10153|RNAS2_HUMAN Non-secretory ribonuclease OS=Homo sapiens OX=9606 GN=RNASE2 PE=1 SV=2	14694	20210911_zy_urine_ethcd_1.6640.6640.4	controllerType=0 controllerNumber=1 scan=6640	29.779
04542:5	11	R.SRYPHKPEIN[+2204.772]STTHPGADLQENFC[+57.021]R.N	HexNAc(4)Hex(5)NeuAc(2)	C[+57], N[+2205]	1032.64	5	5159.16	5159.17	0	-1.4	134	Specific	559.78	485.11	485.11	7.72	13	>sp|P00734|THRB_HUMAN Prothrombin OS=Homo sapiens OX=9606 GN=F2 PE=1 SV=2	18404	20210911_zy_urine_ethcd_1.4990.4990.5	controllerType=0 controllerNumber=1 scan=4990	22.3468
02056:3	6	K.HYTN[+2100.761]SSQDVTVPC[+57.021]R.V	HexNAc(5)Hex(4)Fuc(1)NeuAc(1)	C[+57], N[+2101]	1255.51	3	3764.5	3764.51	0	-2.7	89	Specific	560.98	360.34	360.34	7.09	32	>sp|P01877|IGHA2_HUMAN Immunoglobulin heavy constant alpha 2 OS=Homo sapiens OX=9606 GN=IGHA2 PE=1 SV=4	10403	20210911_zy_urine_ethcd_1.2261.2261.3	controllerType=0 controllerNumber=1 scan=2261	10.1887
12704:4	2	R.QDQC[+57.021]IYN[+3372.190]TTYLNVQR.E	HexNAc(6)Hex(7)Fuc(1)NeuAc(3)	C[+57], N[+3372]	1322.78	4	5288.08	5288.09	0	-1.1	87	Specific	562.78	428.68	428.68	8.94	53	>sp|P02763|A1AG1_HUMAN Alpha-1-acid glycoprotein 1 OS=Homo sapiens OX=9606 GN=ORM1 PE=1 SV=1	2208	20210911_zy_urine_ethcd_1.13935.13935.4	controllerType=0 controllerNumber=1 scan=13935	62.295
11806:4	7	R.ADGTVNQIEGEATPVN[+2715.963]LTEPAK.L	HexNAc(5)Hex(6)Fuc(1)NeuAc(2)	N[+2716]	1243.27	4	4970.07	4970.08	0	-1.6	83	Specific	563.56	439.36	439.36	9.33	25	>sp|P05090|APOD_HUMAN Apolipoprotein D OS=Homo sapiens OX=9606 GN=APOD PE=1 SV=1	120	20210911_zy_urine_ethcd_1.12952.12952.4	controllerType=0 controllerNumber=1 scan=12952	57.9346
05422:3	3	K.EHEGAIYPDN[+2350.830]TTDFQR.A	HexNAc(4)Hex(5)Fuc(1)NeuAc(2)	N[+2351]	1414.89	3	4242.66	4243.67	-1	-1.6	129	Specific	563.74	387.53	387.53	8.42	26	>sp|P00450|CERU_HUMAN Ceruloplasmin OS=Homo sapiens OX=9606 GN=CP PE=1 SV=1	460	20210911_zy_urine_ethcd_1.5956.5956.3	controllerType=0 controllerNumber=1 scan=5956	26.7053
10660:3	2	R.QDQC[+57.021]IYN[+2204.772]TTYLNVQR.E	HexNAc(4)Hex(5)NeuAc(2)	C[+57], N[+2205]	1374.23	3	4120.66	4120.67	0	-1.3	87	Specific	564.86	424.71	424.71	8.65	53	>sp|P02763|A1AG1_HUMAN Alpha-1-acid glycoprotein 1 OS=Homo sapiens OX=9606 GN=ORM1 PE=1 SV=1	2208	20210911_zy_urine_ethcd_1.11696.11696.3	controllerType=0 controllerNumber=1 scan=11696	52.3016
07123:3	3	K.EHEGAIYPDN[+2861.000]TTDFQR.A	HexNAc(5)Hex(6)NeuAc(3)	N[+2861]	1584.95	3	4752.83	4753.84	-1	-0.7	129	Specific	565.52	404.26	404.26	8.2	26	>sp|P00450|CERU_HUMAN Ceruloplasmin OS=Homo sapiens OX=9606 GN=CP PE=1 SV=1	460	20210911_zy_urine_ethcd_1.7822.7822.3	controllerType=0 controllerNumber=1 scan=7822	35.0261
02896:3	23	R.LHEITN[+2059.735]ETFR.G	HexNAc(4)Hex(5)Fuc(1)NeuAc(1)	N[+2060]	1107.13	3	3319.37	3319.37	0	-2.2	112	Specific	565.75	281.36	281.36	6.27	11	>sp|Q6EMK4|VASN_HUMAN Vasorin OS=Homo sapiens OX=9606 GN=VASN PE=1 SV=1	18175	20210911_zy_urine_ethcd_1.3182.3182.3	controllerType=0 controllerNumber=1 scan=3182	14.195
08461:3	1	R.C[+57.021]NTAAPMWLN[+2059.735]GTHPSSDEGIVSR.K	HexNAc(4)Hex(5)Fuc(1)NeuAc(1)	C[+57], N[+2060]	1520.63	3	4559.86	4559.87	0	-1.5	223	Specific	566.13	405.61	405.61	9.37	49	>sp|P07911|UROM_HUMAN Uromodulin OS=Homo sapiens OX=9606 GN=UMOD PE=1 SV=1	16609	20210911_zy_urine_ethcd_1.9287.9287.3	controllerType=0 controllerNumber=1 scan=9287	41.5349
01826:3	6	K.HYTN[+1809.666]SSQDVTVPC[+57.021]R.V	HexNAc(5)Hex(4)Fuc(1)	C[+57], N[+1810]	1158.47	3	3473.41	3473.42	0	-3	89	Specific	569.25	373.64	373.64	6.84	32	>sp|P01877|IGHA2_HUMAN Immunoglobulin heavy constant alpha 2 OS=Homo sapiens OX=9606 GN=IGHA2 PE=1 SV=4	10403	20210911_zy_urine_ethcd_1.2010.2010.3	controllerType=0 controllerNumber=1 scan=2010	9.1705
12654:4	2	R.QDQC[+57.021]IYN[+3226.132]TTYLNVQR.E	HexNAc(6)Hex(7)NeuAc(3)	C[+57], N[+3226]	1286.26	4	5142.02	5142.03	0	-1.1	87	Specific	569.26	423.65	423.65	8.94	53	>sp|P02763|A1AG1_HUMAN Alpha-1-acid glycoprotein 1 OS=Homo sapiens OX=9606 GN=ORM1 PE=1 SV=1	2208	20210911_zy_urine_ethcd_1.13880.13880.4	controllerType=0 controllerNumber=1 scan=13880	62.0466
00975:4	57	K.YPHNHHVVN[+1864.634]NTLEGN[+1378.476]C[+57.021]SSK.S	HexNAc(2)Hex(9),HexNAc(2)Hex(6)	C[+57], N[+1378][+1865]	1363.28	4	5450.1	5450.11	0	-2.3	103	Specific	570.61	468.13	132.21	8.1	5	>sp|P15586|GNS_HUMAN N-acetylglucosamine-6-sulfatase OS=Homo sapiens OX=9606 GN=GNS PE=1 SV=3	5993	20210911_zy_urine_ethcd_1.1078.1078.4	controllerType=0 controllerNumber=1 scan=1078	5.0446
07058:3	3	K.EHEGAIYPDN[+2861.000]TTDFQR.A	HexNAc(5)Hex(6)NeuAc(3)	N[+2861]	1585.28	3	4753.84	4753.84	0	-0.4	129	Specific	571.03	415.75	415.75	7.66	26	>sp|P00450|CERU_HUMAN Ceruloplasmin OS=Homo sapiens OX=9606 GN=CP PE=1 SV=1	460	20210911_zy_urine_ethcd_1.7751.7751.3	controllerType=0 controllerNumber=1 scan=7751	34.7147
12409:4	4	R.QNQC[+57.021]FYN[+2861.000]SSYLNVQR.E	HexNAc(5)Hex(6)NeuAc(3)	C[+57], N[+2861]	1196.22	4	4781.86	4781.87	0	-2	87	Specific	571.42	445.7	445.7	9.12	34	>sp|P19652|A1AG2_HUMAN Alpha-1-acid glycoprotein 2 OS=Homo sapiens OX=9606 GN=ORM2 PE=1 SV=2	4531	20210911_zy_urine_ethcd_1.13612.13612.4	controllerType=0 controllerNumber=1 scan=13612	60.8747
12197:4	4	R.QNQC[+57.021]FYN[+3372.190]SSYLNVQR.E	HexNAc(6)Hex(7)Fuc(1)NeuAc(3)	C[+57], N[+3372]	1324.02	4	5293.07	5293.06	0	1.9	87	Specific	572.31	419.05	419.05	8.15	34	>sp|P19652|A1AG2_HUMAN Alpha-1-acid glycoprotein 2 OS=Homo sapiens OX=9606 GN=ORM2 PE=1 SV=2	4531	20210911_zy_urine_ethcd_1.13380.13380.4	controllerType=0 controllerNumber=1 scan=13380	59.8513
09020:3	8	K.DIVEYYNDSN[+2204.772]GSHVLQGR.F	HexNAc(4)Hex(5)NeuAc(2)	N[+2205]	1424.25	3	4270.72	4270.73	0	-1.5	103	Specific	572.37	422.13	39.3	8.65	33	>sp|P25311|ZA2G_HUMAN Zinc-alpha-2-glycoprotein OS=Homo sapiens OX=9606 GN=AZGP1 PE=1 SV=2	18783	20210911_zy_urine_ethcd_1.9900.9900.3	controllerType=0 controllerNumber=1 scan=9900	44.298
08483:3	1	R.C[+57.021]NTAAPMWLN[+2100.761]GTHPSSDEGIVSR.K	HexNAc(5)Hex(4)Fuc(1)NeuAc(1)	C[+57], N[+2101]	1534.3	3	4600.89	4600.9	0	-0.5	223	Specific	573.12	434.09	434.09	9.16	49	>sp|P07911|UROM_HUMAN Uromodulin OS=Homo sapiens OX=9606 GN=UMOD PE=1 SV=1	16609	20210911_zy_urine_ethcd_1.9311.9311.3	controllerType=0 controllerNumber=1 scan=9311	41.6422
12777:4	2	R.QDQC[+57.021]IYN[+2861.000]TTYLNVQR.E	HexNAc(5)Hex(6)NeuAc(3)	C[+57], N[+2861]	1194.98	4	4776.89	4776.9	0	-1.9	87	Specific	573.24	429.06	429.06	9.12	53	>sp|P02763|A1AG1_HUMAN Alpha-1-acid glycoprotein 1 OS=Homo sapiens OX=9606 GN=ORM1 PE=1 SV=1	2208	20210911_zy_urine_ethcd_1.14015.14015.4	controllerType=0 controllerNumber=1 scan=14015	62.6516
06213:4	5	K.NC[+57.021]HHSGSQVPLIHC[+57.021]N[+2059.735]LTTPSPQNISNC[+57.021]R.Y	HexNAc(4)Hex(5)Fuc(1)NeuAc(1)	C[+57]*3, N[+2060]	1322.8	4	5288.2	5288.22	0	-4.1	97	Specific	573.54	464.28	86.56	9.28	16	>sp|P10153|RNAS2_HUMAN Non-secretory ribonuclease OS=Homo sapiens OX=9606 GN=RNASE2 PE=1 SV=2	14694	20210911_zy_urine_ethcd_1.6823.6823.4	controllerType=0 controllerNumber=1 scan=6823	30.5957
14128:4	2	R.QDQC[+57.021]IYN[+3517.228]TTYLNVQR.E	HexNAc(6)Hex(7)NeuAc(4)	C[+57], N[+3517]	1359.03	4	5433.11	5433.12	0	-2	87	Specific	578.38	419	419	9.12	53	>sp|P02763|A1AG1_HUMAN Alpha-1-acid glycoprotein 1 OS=Homo sapiens OX=9606 GN=ORM1 PE=1 SV=1	2208	20210911_zy_urine_ethcd_1.15491.15491.4	controllerType=0 controllerNumber=1 scan=15491	69.1215
12622:4	2	R.QDQC[+57.021]IYN[+3372.190]TTYLNVQR.E	HexNAc(6)Hex(7)Fuc(1)NeuAc(3)	C[+57], N[+3372]	1322.77	4	5288.08	5288.09	0	-1.8	87	Specific	582.35	444.25	444.25	9.96	53	>sp|P02763|A1AG1_HUMAN Alpha-1-acid glycoprotein 1 OS=Homo sapiens OX=9606 GN=ORM1 PE=1 SV=1	2208	20210911_zy_urine_ethcd_1.13845.13845.4	controllerType=0 controllerNumber=1 scan=13845	61.8914
12714:3	2	R.QDQC[+57.021]IYN[+3226.132]TTYLNVQR.E	HexNAc(6)Hex(7)NeuAc(3)	C[+57], N[+3226]	1714.35	3	5141.03	5142.03	-1	0	87	Specific	587.97	410.12	410.12	9.05	53	>sp|P02763|A1AG1_HUMAN Alpha-1-acid glycoprotein 1 OS=Homo sapiens OX=9606 GN=ORM1 PE=1 SV=1	2208	20210911_zy_urine_ethcd_1.13946.13946.3	controllerType=0 controllerNumber=1 scan=13946	62.3467
12388:3	4	R.QNQC[+57.021]FYN[+2861.000]SSYLNVQR.E	HexNAc(5)Hex(6)NeuAc(3)	C[+57], N[+2861]	1594.62	3	4781.86	4781.87	0	-1.8	87	Specific	588.95	444.89	444.89	9.67	34	>sp|P19652|A1AG2_HUMAN Alpha-1-acid glycoprotein 2 OS=Homo sapiens OX=9606 GN=ORM2 PE=1 SV=2	4531	20210911_zy_urine_ethcd_1.13589.13589.3	controllerType=0 controllerNumber=1 scan=13589	60.7707
06370:3	3	K.ELHHLQEQN[+2350.830]VSNAFLDK.G	HexNAc(4)Hex(5)Fuc(1)NeuAc(2)	N[+2351]	1458.28	3	4372.83	4372.83	0	-0.9	754	Specific	589.24	464.04	464.04	8.8	26	>sp|P00450|CERU_HUMAN Ceruloplasmin OS=Homo sapiens OX=9606 GN=CP PE=1 SV=1	460	20210911_zy_urine_ethcd_1.6995.6995.3	controllerType=0 controllerNumber=1 scan=6995	31.3559
10767:3	15	R.GLTFQQN[+2262.814]ASSMC[+57.021]VPDQDTAIR.V	HexNAc(5)Hex(5)Fuc(1)NeuAc(1)	C[+57], N[+2263]	1534.3	3	4600.89	4601.89	-1	-0.2	203	Specific	591.34	416.26	146.04	9.44	12	>sp|P01871|IGHM_HUMAN Immunoglobulin heavy constant mu OS=Homo sapiens OX=9606 GN=IGHM PE=1 SV=4	10127	20210911_zy_urine_ethcd_1.11813.11813.3	controllerType=0 controllerNumber=1 scan=11813	52.8199
12624:4	2	R.QDQC[+57.021]IYN[+3517.228]TTYLNVQR.E	HexNAc(6)Hex(7)NeuAc(4)	C[+57], N[+3517]	1359.04	4	5433.13	5433.12	0	1.9	87	Specific	594.39	460.44	460.44	8.99	53	>sp|P02763|A1AG1_HUMAN Alpha-1-acid glycoprotein 1 OS=Homo sapiens OX=9606 GN=ORM1 PE=1 SV=1	2208	20210911_zy_urine_ethcd_1.13847.13847.4	controllerType=0 controllerNumber=1 scan=13847	61.8996
08056:4	3	K.ELHHLQEQN[+3007.058]VSNAFLDK.G	HexNAc(5)Hex(6)Fuc(1)NeuAc(3)	N[+3007]	1258.02	4	5029.05	5029.06	0	-1.7	754	Specific	595.25	509.78	509.78	9.28	26	>sp|P00450|CERU_HUMAN Ceruloplasmin OS=Homo sapiens OX=9606 GN=CP PE=1 SV=1	460	20210911_zy_urine_ethcd_1.8844.8844.4	controllerType=0 controllerNumber=1 scan=8844	39.5876
05986:4	40	R.QGIDFC[+57.021]PGQN[+1702.581]VSGVTTHNLEDHTK.L	HexNAc(2)Hex(8)	C[+57], N[+1703]	1089.95	4	4356.79	4356.81	0	-3.6	414	Specific	596.67	550.43	550.43	9.96	2	>sp|P34059|GALNS_HUMAN N-acetylgalactosamine-6-sulfatase OS=Homo sapiens OX=9606 GN=GALNS PE=1 SV=1	5352	20210911_zy_urine_ethcd_1.6574.6574.4	controllerType=0 controllerNumber=1 scan=6574	29.4822
13773:4	1	R.C[+57.021]NTAAPMWLN[+3663.286]GTHPSSDEGIVSR.K	HexNAc(6)Hex(7)Fuc(1)NeuAc(4)	C[+57], N[+3663]	1541.61	4	6163.4	6163.42	0	-3	223	Specific	599.85	440.9	440.9	9.94	49	>sp|P07911|UROM_HUMAN Uromodulin OS=Homo sapiens OX=9606 GN=UMOD PE=1 SV=1	16609	20210911_zy_urine_ethcd_1.15104.15104.4	controllerType=0 controllerNumber=1 scan=15104	67.4448
12948:3	2	R.QDQC[+57.021]IYN[+3007.058]TTYLNVQR.E	HexNAc(5)Hex(6)Fuc(1)NeuAc(3)	C[+57], N[+3007]	1641.65	3	4922.95	4922.95	0	-1.4	87	Specific	600.78	428.25	428.25	10.48	53	>sp|P02763|A1AG1_HUMAN Alpha-1-acid glycoprotein 1 OS=Homo sapiens OX=9606 GN=ORM1 PE=1 SV=1	2208	20210911_zy_urine_ethcd_1.14202.14202.3	controllerType=0 controllerNumber=1 scan=14202	63.4776
14002:3	9	R.QQQHLFGSN[+2350.830]VTDC[+57.021]SGNFC[+57.021]LFR.S	HexNAc(4)Hex(5)Fuc(1)NeuAc(2)	C[+57]*2, N[+2351]	1622.65	3	4865.95	4865.95	0	-1.5	622	Specific	600.81	427.11	427.11	10.96	20	>sp|P02787|TRFE_HUMAN Serotransferrin OS=Homo sapiens OX=9606 GN=TF PE=1 SV=3	18223	20210911_zy_urine_ethcd_1.15354.15354.3	controllerType=0 controllerNumber=1 scan=15354	68.5276
08472:3	1	R.C[+57.021]NTAAPMWLN[+2059.735]GTHPSSDEGIVSR.K	HexNAc(4)Hex(5)Fuc(1)NeuAc(1)	C[+57], N[+2060]	1520.63	3	4559.86	4559.87	0	-1.2	223	Specific	604.06	435.17	435.17	11.21	49	>sp|P07911|UROM_HUMAN Uromodulin OS=Homo sapiens OX=9606 GN=UMOD PE=1 SV=1	16609	20210911_zy_urine_ethcd_1.9299.9299.3	controllerType=0 controllerNumber=1 scan=9299	41.5883
07289:3	8	K.DIVEYYNDSN[+1913.677]GSHVLQGR.F	HexNAc(4)Hex(5)NeuAc(1)	N[+1914]	1327.21	3	3979.63	3979.63	0	-1.8	103	Specific	604.75	431.26	64.87	10.68	33	>sp|P25311|ZA2G_HUMAN Zinc-alpha-2-glycoprotein OS=Homo sapiens OX=9606 GN=AZGP1 PE=1 SV=2	18783	20210911_zy_urine_ethcd_1.8004.8004.3	controllerType=0 controllerNumber=1 scan=8004	35.8382
13998:3	9	R.QQQHLFGSN[+2350.830]VTDC[+57.021]SGNFC[+57.021]LFR.S	HexNAc(4)Hex(5)Fuc(1)NeuAc(2)	C[+57]*2, N[+2351]	1622.65	3	4865.94	4865.95	0	-3	622	Specific	607.41	390.25	49.69	10.77	20	>sp|P02787|TRFE_HUMAN Serotransferrin OS=Homo sapiens OX=9606 GN=TF PE=1 SV=3	18223	20210911_zy_urine_ethcd_1.15349.15349.3	controllerType=0 controllerNumber=1 scan=15349	68.5071
12718:3	2	R.QDQC[+57.021]IYN[+3007.058]TTYLNVQR.E	HexNAc(5)Hex(6)Fuc(1)NeuAc(3)	C[+57], N[+3007]	1641.66	3	4922.95	4922.95	0	-0.1	87	Specific	608.17	455.99	455.99	9.88	53	>sp|P02763|A1AG1_HUMAN Alpha-1-acid glycoprotein 1 OS=Homo sapiens OX=9606 GN=ORM1 PE=1 SV=1	2208	20210911_zy_urine_ethcd_1.13950.13950.3	controllerType=0 controllerNumber=1 scan=13950	62.3647
12716:3	2	R.QDQC[+57.021]IYN[+2861.000]TTYLNVQR.E	HexNAc(5)Hex(6)NeuAc(3)	C[+57], N[+2861]	1592.97	3	4776.89	4776.9	0	-1.6	87	Specific	608.69	426.09	426.09	10.48	53	>sp|P02763|A1AG1_HUMAN Alpha-1-acid glycoprotein 1 OS=Homo sapiens OX=9606 GN=ORM1 PE=1 SV=1	2208	20210911_zy_urine_ethcd_1.13948.13948.3	controllerType=0 controllerNumber=1 scan=13948	62.3555
06195:4	5	K.NC[+57.021]HHSGSQVPLIHC[+57.021]N[+2059.735]LTTPSPQNISNC[+57.021]R.Y	HexNAc(4)Hex(5)Fuc(1)NeuAc(1)	C[+57]*3, N[+2060]	1322.81	4	5288.21	5288.22	0	-2.2	97	Specific	608.92	504.3	53.57	11.25	16	>sp|P10153|RNAS2_HUMAN Non-secretory ribonuclease OS=Homo sapiens OX=9606 GN=RNASE2 PE=1 SV=2	14694	20210911_zy_urine_ethcd_1.6803.6803.4	controllerType=0 controllerNumber=1 scan=6803	30.5089
13982:4	2	R.QDQC[+57.021]IYN[+3517.228]TTYLNVQR.E	HexNAc(6)Hex(7)NeuAc(4)	C[+57], N[+3517]	1359.03	4	5433.12	5433.12	0	-1.2	87	Specific	610.94	450.88	450.88	10.78	53	>sp|P02763|A1AG1_HUMAN Alpha-1-acid glycoprotein 1 OS=Homo sapiens OX=9606 GN=ORM1 PE=1 SV=1	2208	20210911_zy_urine_ethcd_1.15332.15332.4	controllerType=0 controllerNumber=1 scan=15332	68.4313
12578:4	2	R.QDQC[+57.021]IYN[+3226.132]TTYLNVQR.E	HexNAc(6)Hex(7)NeuAc(3)	C[+57], N[+3226]	1286.26	4	5142.02	5142.03	0	-1.9	87	Specific	611.41	463.96	463.96	10.96	53	>sp|P02763|A1AG1_HUMAN Alpha-1-acid glycoprotein 1 OS=Homo sapiens OX=9606 GN=ORM1 PE=1 SV=1	2208	20210911_zy_urine_ethcd_1.13797.13797.4	controllerType=0 controllerNumber=1 scan=13797	61.6832
13841:4	4	R.QNQC[+57.021]FYN[+3663.286]SSYLNVQR.E	HexNAc(6)Hex(7)Fuc(1)NeuAc(4)	C[+57], N[+3663]	1396.54	4	5583.14	5584.15	-1	-0.9	87	Specific	612.57	387.66	387.66	10.72	34	>sp|P19652|A1AG2_HUMAN Alpha-1-acid glycoprotein 2 OS=Homo sapiens OX=9606 GN=ORM2 PE=1 SV=2	4531	20210911_zy_urine_ethcd_1.15178.15178.4	controllerType=0 controllerNumber=1 scan=15178	67.767
05572:3	8	K.DIVEYYNDSN[+2262.814]GSHVLQGR.F	HexNAc(5)Hex(5)Fuc(1)NeuAc(1)	N[+2263]	1443.93	3	4329.78	4328.77	1	2.3	103	Specific	615.36	486.53	64.95	9.63	33	>sp|P25311|ZA2G_HUMAN Zinc-alpha-2-glycoprotein OS=Homo sapiens OX=9606 GN=AZGP1 PE=1 SV=2	18783	20210911_zy_urine_ethcd_1.6120.6120.3	controllerType=0 controllerNumber=1 scan=6120	27.4367
13400:3	1	R.FALLM[+15.995]TNC[+57.021]YATPSSN[+2059.735]ATDPLK.Y	HexNAc(4)Hex(5)Fuc(1)NeuAc(1)	C[+57], M[+16], N[+2060]	1464.28	3	4390.83	4390.83	0	-1.9	499	Specific	615.9	451.22	366.8	11.06	49	>sp|P07911|UROM_HUMAN Uromodulin OS=Homo sapiens OX=9606 GN=UMOD PE=1 SV=1	16609	20210911_zy_urine_ethcd_1.14696.14696.3	controllerType=0 controllerNumber=1 scan=14696	65.6449
14598:3	33	K.SVVAPATDGGLN[+2262.814]LTSTFLR.K	HexNAc(5)Hex(5)Fuc(1)NeuAc(1)	N[+2263]	1394.62	3	4181.84	4181.84	0	-0.5	67	Specific	618.48	466.16	466.16	9.67	11	>sp|P41222|PTGDS_HUMAN Prostaglandin-H2 D-isomerase OS=Homo sapiens OX=9606 GN=PTGDS PE=1 SV=1	16974	20210911_zy_urine_ethcd_1.16005.16005.3	controllerType=0 controllerNumber=1 scan=16005	71.3677
02017:3	6	K.HYTN[+2059.735]SSQDVTVPC[+57.021]R.V	HexNAc(4)Hex(5)Fuc(1)NeuAc(1)	C[+57], N[+2060]	1241.83	3	3723.48	3723.48	0	-2	89	Specific	619.77	378.93	378.93	9.06	32	>sp|P01877|IGHA2_HUMAN Immunoglobulin heavy constant alpha 2 OS=Homo sapiens OX=9606 GN=IGHA2 PE=1 SV=4	10403	20210911_zy_urine_ethcd_1.2218.2218.3	controllerType=0 controllerNumber=1 scan=2218	10.0253
02339:3	6	K.HYTN[+2350.830]SSQDVTVPC[+57.021]R.V	HexNAc(4)Hex(5)Fuc(1)NeuAc(2)	C[+57], N[+2351]	1338.86	3	4014.57	4014.58	0	-2.3	89	Specific	620.3	367.98	367.98	8.92	32	>sp|P01877|IGHA2_HUMAN Immunoglobulin heavy constant alpha 2 OS=Homo sapiens OX=9606 GN=IGHA2 PE=1 SV=4	10403	20210911_zy_urine_ethcd_1.2570.2570.3	controllerType=0 controllerNumber=1 scan=2570	11.5086
04448:4	11	R.SRYPHKPEIN[+2350.830]STTHPGADLQENFC[+57.021]R.N	HexNAc(4)Hex(5)Fuc(1)NeuAc(2)	C[+57], N[+2351]	1327.06	4	5305.22	5305.23	0	-0.6	134	Specific	620.42	539.61	539.61	10.35	13	>sp|P00734|THRB_HUMAN Prothrombin OS=Homo sapiens OX=9606 GN=F2 PE=1 SV=2	18404	20210911_zy_urine_ethcd_1.4887.4887.4	controllerType=0 controllerNumber=1 scan=4887	21.8808
13276:3	9	R.QQQHLFGSN[+1913.677]VTDC[+57.021]SGNFC[+57.021]LFR.S	HexNAc(4)Hex(5)NeuAc(1)	C[+57]*2, N[+1914]	1476.94	3	4428.79	4428.8	0	-2.2	622	Specific	621.99	500.97	500.97	11.14	20	>sp|P02787|TRFE_HUMAN Serotransferrin OS=Homo sapiens OX=9606 GN=TF PE=1 SV=3	18223	20210911_zy_urine_ethcd_1.14560.14560.3	controllerType=0 controllerNumber=1 scan=14560	65.0531
05375:4	5	K.NC[+57.021]HHSGSQVPLIHC[+57.021]N[+876.322]LTTPSPQN[+203.079]ISNC[+57.021]R.Y	HexNAc(2)Hex(2)Fuc(1),HexNAc(1)	C[+57]*3, N[+203][+876]	1077.73	4	4307.89	4307.89	0	0.1	97	Specific	622.93	615.59	72.4	10.46	16	>sp|P10153|RNAS2_HUMAN Non-secretory ribonuclease OS=Homo sapiens OX=9606 GN=RNASE2 PE=1 SV=2	14694	20210911_zy_urine_ethcd_1.5904.5904.4	controllerType=0 controllerNumber=1 scan=5904	26.475
12238:4	4	R.QNQC[+57.021]FYN[+3226.132]SSYLNVQR.E	HexNAc(6)Hex(7)NeuAc(3)	C[+57], N[+3226]	1287.51	4	5147	5147	0	1.3	87	Specific	626.08	492.79	492.79	10.05	34	>sp|P19652|A1AG2_HUMAN Alpha-1-acid glycoprotein 2 OS=Homo sapiens OX=9606 GN=ORM2 PE=1 SV=2	4531	20210911_zy_urine_ethcd_1.13425.13425.4	controllerType=0 controllerNumber=1 scan=13425	60.0509
06004:4	5	K.NC[+57.021]HHSGSQVPLIHC[+57.021]N[+349.137]LTTPSPQN[+203.079]ISNC[+57.021]R.Y	HexNAc(1)Fuc(1),HexNAc(1)	C[+57]*3, N[+203][+349]	945.925	4	3780.68	3780.7	0	-5.8	97	Specific	627.18	624.78	25.95	10.85	16	>sp|P10153|RNAS2_HUMAN Non-secretory ribonuclease OS=Homo sapiens OX=9606 GN=RNASE2 PE=1 SV=2	14694	20210911_zy_urine_ethcd_1.6594.6594.4	controllerType=0 controllerNumber=1 scan=6594	29.5707
04006:3	3	K.EHEGAIYPDN[+1913.677]TTDFQR.A	HexNAc(4)Hex(5)NeuAc(1)	N[+1914]	1269.51	3	3806.51	3806.52	0	-1.2	129	Specific	627.96	400.74	400.74	10.1	26	>sp|P00450|CERU_HUMAN Ceruloplasmin OS=Homo sapiens OX=9606 GN=CP PE=1 SV=1	460	20210911_zy_urine_ethcd_1.4401.4401.3	controllerType=0 controllerNumber=1 scan=4401	19.6831
14545:3	33	K.SVVAPATDGGLN[+2262.814]LTSTFLR.K	HexNAc(5)Hex(5)Fuc(1)NeuAc(1)	N[+2263]	1394.62	3	4181.84	4181.84	0	-0.5	67	Specific	630.29	459.37	459.37	9.67	11	>sp|P41222|PTGDS_HUMAN Prostaglandin-H2 D-isomerase OS=Homo sapiens OX=9606 GN=PTGDS PE=1 SV=1	16974	20210911_zy_urine_ethcd_1.15947.15947.3	controllerType=0 controllerNumber=1 scan=15947	71.1136
12249:4	4	R.QNQC[+57.021]FYN[+3372.190]SSYLNVQR.E	HexNAc(6)Hex(7)Fuc(1)NeuAc(3)	C[+57], N[+3372]	1323.77	4	5292.06	5293.06	-1	0.8	87	Specific	631.74	430.58	430.58	10.21	34	>sp|P19652|A1AG2_HUMAN Alpha-1-acid glycoprotein 2 OS=Homo sapiens OX=9606 GN=ORM2 PE=1 SV=2	4531	20210911_zy_urine_ethcd_1.13437.13437.4	controllerType=0 controllerNumber=1 scan=13437	60.1026
14090:3	9	R.QQQHLFGSN[+2204.772]VTDC[+57.021]SGNFC[+57.021]LFR.S	HexNAc(4)Hex(5)NeuAc(2)	C[+57]*2, N[+2205]	1573.97	3	4719.89	4719.9	0	-2.2	622	Specific	640.08	502.54	502.54	11.14	20	>sp|P02787|TRFE_HUMAN Serotransferrin OS=Homo sapiens OX=9606 GN=TF PE=1 SV=3	18223	20210911_zy_urine_ethcd_1.15450.15450.3	controllerType=0 controllerNumber=1 scan=15450	68.9437
05478:4	11	R.YPHKPEIN[+2350.830]STTHPGADLQENFC[+57.021]R.N	HexNAc(4)Hex(5)Fuc(1)NeuAc(2)	C[+57], N[+2351]	1266.28	4	5062.08	5062.09	0	-2.4	136	Specific	651.1	561.54	92.04	12.18	13	>sp|P00734|THRB_HUMAN Prothrombin OS=Homo sapiens OX=9606 GN=F2 PE=1 SV=2	18404	20210911_zy_urine_ethcd_1.6017.6017.4	controllerType=0 controllerNumber=1 scan=6017	26.9734
12842:3	2	R.QDQC[+57.021]IYN[+2861.000]TTYLNVQR.E	HexNAc(5)Hex(6)NeuAc(3)	C[+57], N[+2861]	1592.97	3	4776.89	4776.9	0	-1	87	Specific	652.44	473.51	473.51	11.27	53	>sp|P02763|A1AG1_HUMAN Alpha-1-acid glycoprotein 1 OS=Homo sapiens OX=9606 GN=ORM1 PE=1 SV=1	2208	20210911_zy_urine_ethcd_1.14086.14086.3	controllerType=0 controllerNumber=1 scan=14086	62.9619
06489:4	3	K.ELHHLQEQN[+2204.772]VSNAFLDK.G	HexNAc(4)Hex(5)NeuAc(2)	N[+2205]	1057.45	4	4226.77	4226.78	0	-1.5	754	Specific	655.22	501.1	501.1	11.1	26	>sp|P00450|CERU_HUMAN Ceruloplasmin OS=Homo sapiens OX=9606 GN=CP PE=1 SV=1	460	20210911_zy_urine_ethcd_1.7125.7125.4	controllerType=0 controllerNumber=1 scan=7125	31.9282
10077:3	7	R.ADGTVNQIEGEATPVN[+1913.677]LTEPAK.L	HexNAc(4)Hex(5)NeuAc(1)	N[+1914]	1389.94	3	4167.79	4167.8	0	-1.4	83	Specific	659.01	475.59	475.59	11.88	25	>sp|P05090|APOD_HUMAN Apolipoprotein D OS=Homo sapiens OX=9606 GN=APOD PE=1 SV=1	120	20210911_zy_urine_ethcd_1.11058.11058.3	controllerType=0 controllerNumber=1 scan=11058	49.4802
14892:4	1	R.FALLMTNC[+57.021]YATPSSN[+2919.042]ATDPLK.Y	HexNAc(6)Hex(6)Fuc(1)NeuAc(2)	C[+57], N[+2919]	1309.29	4	5234.13	5234.15	0	-2.4	499	Specific	659.78	569.66	569.66	12.22	49	>sp|P07911|UROM_HUMAN Uromodulin OS=Homo sapiens OX=9606 GN=UMOD PE=1 SV=1	16609	20210911_zy_urine_ethcd_1.16326.16326.4	controllerType=0 controllerNumber=1 scan=16326	72.7832
05370:3	3	K.EHEGAIYPDN[+2204.772]TTDFQR.A	HexNAc(4)Hex(5)NeuAc(2)	N[+2205]	1366.54	3	4097.61	4097.61	0	-0.7	129	Specific	666.61	466.18	466.18	10.88	26	>sp|P00450|CERU_HUMAN Ceruloplasmin OS=Homo sapiens OX=9606 GN=CP PE=1 SV=1	460	20210911_zy_urine_ethcd_1.5898.5898.3	controllerType=0 controllerNumber=1 scan=5898	26.4471
13432:3	3	K.EN[+2204.772]LTAPGSDSAVFFEQGTTR.I	HexNAc(4)Hex(5)NeuAc(2)	N[+2205]	1444.59	3	4331.76	4331.77	0	-1.5	396	Specific	672.66	497.18	497.18	10.89	26	>sp|P00450|CERU_HUMAN Ceruloplasmin OS=Homo sapiens OX=9606 GN=CP PE=1 SV=1	460	20210911_zy_urine_ethcd_1.14731.14731.3	controllerType=0 controllerNumber=1 scan=14731	65.7991
14124:3	9	R.QQQHLFGSN[+2204.772]VTDC[+57.021]SGNFC[+57.021]LFR.S	HexNAc(4)Hex(5)NeuAc(2)	C[+57]*2, N[+2205]	1573.97	3	4719.89	4719.9	0	-1.5	622	Specific	681.61	504.7	504.7	11.96	20	>sp|P02787|TRFE_HUMAN Serotransferrin OS=Homo sapiens OX=9606 GN=TF PE=1 SV=3	18223	20210911_zy_urine_ethcd_1.15487.15487.3	controllerType=0 controllerNumber=1 scan=15487	69.1031
12346:3	4	R.QNQC[+57.021]FYN[+3007.058]SSYLNVQR.E	HexNAc(5)Hex(6)Fuc(1)NeuAc(3)	C[+57], N[+3007]	1643.31	3	4927.92	4927.92	0	-0.3	87	Specific	683.38	484.03	484.03	10.88	34	>sp|P19652|A1AG2_HUMAN Alpha-1-acid glycoprotein 2 OS=Homo sapiens OX=9606 GN=ORM2 PE=1 SV=2	4531	20210911_zy_urine_ethcd_1.13543.13543.3	controllerType=0 controllerNumber=1 scan=13543	60.5678
04388:5	11	R.SRYPHKPEIN[+2204.772]STTHPGADLQENFC[+57.021]R.N	HexNAc(4)Hex(5)NeuAc(2)	C[+57], N[+2205]	1032.44	5	5158.15	5159.17	-1	-2.4	134	Specific	690.37	571.26	571.26	11.45	13	>sp|P00734|THRB_HUMAN Prothrombin OS=Homo sapiens OX=9606 GN=F2 PE=1 SV=2	18404	20210911_zy_urine_ethcd_1.4821.4821.5	controllerType=0 controllerNumber=1 scan=4821	21.5888
05852:4	5	K.NC[+57.021]HHSGSQVPLIHC[+57.021]N[+552.217]LTTPSPQN[+203.079]ISNC[+57.021]R.Y	HexNAc(2)Fuc(1),HexNAc(1)	C[+57]*3, N[+203][+552]	996.696	4	3983.76	3983.78	0	-4.9	97	Specific	722.24	670.74	111.89	12.81	16	>sp|P10153|RNAS2_HUMAN Non-secretory ribonuclease OS=Homo sapiens OX=9606 GN=RNASE2 PE=1 SV=2	14694	20210911_zy_urine_ethcd_1.6427.6427.4	controllerType=0 controllerNumber=1 scan=6427	28.8191
05977:4	5	K.NC[+57.021]HHSGSQVPLIHC[+57.021]N[+349.137]LTTPSPQN[+203.079]ISNC[+57.021]R.Y	HexNAc(1)Fuc(1),HexNAc(1)	C[+57]*3, N[+203][+349]	945.925	4	3780.68	3780.7	0	-5.7	97	Specific	748.83	720.59	53.28	12.34	16	>sp|P10153|RNAS2_HUMAN Non-secretory ribonuclease OS=Homo sapiens OX=9606 GN=RNASE2 PE=1 SV=2	14694	20210911_zy_urine_ethcd_1.6564.6564.4	controllerType=0 controllerNumber=1 scan=6564	29.4365
05432:4	11	R.YPHKPEIN[+2204.772]STTHPGADLQENFC[+57.021]R.N	HexNAc(4)Hex(5)NeuAc(2)	C[+57], N[+2205]	1229.76	4	4916.03	4916.04	0	-1.8	136	Specific	766.36	626.41	626.41	14.31	13	>sp|P00734|THRB_HUMAN Prothrombin OS=Homo sapiens OX=9606 GN=F2 PE=1 SV=2	18404	20210911_zy_urine_ethcd_1.5967.5967.4	controllerType=0 controllerNumber=1 scan=5967	26.7545
13548:4	28	R.C[+57.021]LNWLDAQSGLASAPVSGAGN[+2350.830]HSYC[+57.021]R.N	HexNAc(4)Hex(5)Fuc(1)NeuAc(2)	C[+57]*2, N[+2351]	1286.28	4	5142.09	5142.1	0	-2.3	46	Specific	781.91	648.91	70.43	13.84	4	>sp|Q96FE7|P3IP1_HUMAN Phosphoinositide-3-kinase-interacting protein 1 OS=Homo sapiens OX=9606 GN=PIK3IP1 PE=1 SV=2	11936	20210911_zy_urine_ethcd_1.14858.14858.4	controllerType=0 controllerNumber=1 scan=14858	66.3633
04427:4	11	R.SRYPHKPEIN[+2204.772]STTHPGADLQENFC[+57.021]R.N	HexNAc(4)Hex(5)NeuAc(2)	C[+57], N[+2205]	1290.55	4	5159.16	5159.17	0	-1.7	134	Specific	797.78	722.11	722.11	13.75	13	>sp|P00734|THRB_HUMAN Prothrombin OS=Homo sapiens OX=9606 GN=F2 PE=1 SV=2	18404	20210911_zy_urine_ethcd_1.4864.4864.4	controllerType=0 controllerNumber=1 scan=4864	21.7787
05279:4	5	K.NC[+57.021]HHSGSQVPLIHC[+57.021]N[+349.137]LTTPSPQN[+203.079]ISNC[+57.021]R.Y	HexNAc(1)Fuc(1),HexNAc(1)	C[+57]*3, N[+203][+349]	945.927	4	3780.69	3780.7	0	-3.6	97	Specific	808.49	746.3	48.58	14.61	16	>sp|P10153|RNAS2_HUMAN Non-secretory ribonuclease OS=Homo sapiens OX=9606 GN=RNASE2 PE=1 SV=2	14694	20210911_zy_urine_ethcd_1.5799.5799.4	controllerType=0 controllerNumber=1 scan=5799	25.9982
05243:4	5	K.NC[+57.021]HHSGSQVPLIHC[+57.021]N[+876.322]LTTPSPQN[+203.079]ISNC[+57.021]R.Y	HexNAc(2)Hex(2)Fuc(1),HexNAc(1)	C[+57]*3, N[+203][+876]	1077.72	4	4307.87	4307.89	0	-3.3	97	Specific	813.32	772.17	132.11	14.87	16	>sp|P10153|RNAS2_HUMAN Non-secretory ribonuclease OS=Homo sapiens OX=9606 GN=RNASE2 PE=1 SV=2	14694	20210911_zy_urine_ethcd_1.5759.5759.3	controllerType=0 controllerNumber=1 scan=5759	25.8215
05769:4	5	K.NC[+57.021]HHSGSQVPLIHC[+57.021]N[+552.217]LTTPSPQN[+203.079]ISNC[+57.021]R.Y	HexNAc(2)Fuc(1),HexNAc(1)	C[+57]*3, N[+203][+552]	996.698	4	3983.77	3983.78	0	-3	97	Specific	837.06	712.67	94.9	14.87	16	>sp|P10153|RNAS2_HUMAN Non-secretory ribonuclease OS=Homo sapiens OX=9606 GN=RNASE2 PE=1 SV=2	14694	20210911_zy_urine_ethcd_1.6336.6336.4	controllerType=0 controllerNumber=1 scan=6336	28.4034
05410:4	5	K.NC[+57.021]HHSGSQVPLIHC[+57.021]N[+349.137]LTTPSPQN[+203.079]ISNC[+57.021]R.Y	HexNAc(1)Fuc(1),HexNAc(1)	C[+57]*3, N[+203][+349]	945.928	4	3780.69	3780.7	0	-3.3	97	Specific	918.16	891.81	24.69	16.36	16	>sp|P10153|RNAS2_HUMAN Non-secretory ribonuclease OS=Homo sapiens OX=9606 GN=RNASE2 PE=1 SV=2	14694	20210911_zy_urine_ethcd_1.5942.5942.3	controllerType=0 controllerNumber=1 scan=5942	26.6455
05688:4	5	K.NC[+57.021]HHSGSQVPLIHC[+57.021]N[+552.217]LTTPSPQN[+203.079]ISNC[+57.021]R.Y	HexNAc(2)Fuc(1),HexNAc(1)	C[+57]*3, N[+203][+552]	996.697	4	3983.77	3983.78	0	-3.5	97	Specific	961.83	904.91	93.12	17.87	16	>sp|P10153|RNAS2_HUMAN Non-secretory ribonuclease OS=Homo sapiens OX=9606 GN=RNASE2 PE=1 SV=2	14694	20210911_zy_urine_ethcd_1.6247.6247.4	controllerType=0 controllerNumber=1 scan=6247	28.0084
05621:4	5	K.NC[+57.021]HHSGSQVPLIHC[+57.021]N[+552.217]LTTPSPQN[+203.079]ISNC[+57.021]R.Y	HexNAc(2)Fuc(1),HexNAc(1)	C[+57]*3, N[+203][+552]	996.698	4	3983.77	3983.78	0	-2.1	97	Specific	964.17	911.92	121.62	18.25	16	>sp|P10153|RNAS2_HUMAN Non-secretory ribonuclease OS=Homo sapiens OX=9606 GN=RNASE2 PE=1 SV=2	14694	20210911_zy_urine_ethcd_1.6174.6174.4	controllerType=0 controllerNumber=1 scan=6174	27.6791
05438:4	5	K.NC[+57.021]HHSGSQVPLIHC[+57.021]N[+406.159]LTTPSPQNISNC[+57.021]R.Y	HexNAc(2)	C[+57]*3, N[+406]	909.414	4	3634.63	3634.64	0	-2.8	97	Specific	986.88	882.15	12.3	18.11	16	>sp|P10153|RNAS2_HUMAN Non-secretory ribonuclease OS=Homo sapiens OX=9606 GN=RNASE2 PE=1 SV=2	14694	20210911_zy_urine_ethcd_1.5973.5973.4	controllerType=0 controllerNumber=1 scan=5973	26.7813
05628:4	5	K.NC[+57.021]HHSGSQVPLIHC[+57.021]NLTTPSPQN[+406.159]ISNC[+57.021]R.Y	HexNAc(2)	C[+57]*3, N[+406]	909.415	4	3634.64	3634.64	0	-1.7	97	Specific	1023.49	955.33	6.63	19.25	16	>sp|P10153|RNAS2_HUMAN Non-secretory ribonuclease OS=Homo sapiens OX=9606 GN=RNASE2 PE=1 SV=2	14694	20210911_zy_urine_ethcd_1.6181.6181.4	controllerType=0 controllerNumber=1 scan=6181	27.7124
05206:4	5	K.NC[+57.021]HHSGSQVPLIHC[+57.021]N[+876.322]LTTPSPQN[+203.079]ISNC[+57.021]R.Y	HexNAc(2)Hex(2)Fuc(1),HexNAc(1)	C[+57]*3, N[+203][+876]	1077.72	4	4307.87	4307.89	0	-3.9	97	Specific	1046.51	966.08	116.62	19.12	16	>sp|P10153|RNAS2_HUMAN Non-secretory ribonuclease OS=Homo sapiens OX=9606 GN=RNASE2 PE=1 SV=2	14694	20210911_zy_urine_ethcd_1.5719.5719.4	controllerType=0 controllerNumber=1 scan=5719	25.642
05268:4	5	K.NC[+57.021]HHSGSQVPLIHC[+57.021]N[+876.322]LTTPSPQN[+203.079]ISNC[+57.021]R.Y	HexNAc(2)Hex(2)Fuc(1),HexNAc(1)	C[+57]*3, N[+203][+876]	1077.72	4	4307.88	4307.89	0	-2.4	97	Specific	1049.34	997.55	157.27	19.11	16	>sp|P10153|RNAS2_HUMAN Non-secretory ribonuclease OS=Homo sapiens OX=9606 GN=RNASE2 PE=1 SV=2	14694	20210911_zy_urine_ethcd_1.5787.5787.4	controllerType=0 controllerNumber=1 scan=5787	25.9454
05652:4	5	K.NC[+57.021]HHSGSQVPLIHC[+57.021]N[+349.137]LTTPSPQN[+203.079]ISNC[+57.021]R.Y	HexNAc(1)Fuc(1),HexNAc(1)	C[+57]*3, N[+203][+349]	945.928	4	3780.69	3780.7	0	-3.4	97	Specific	1094.1	1042.89	63.84	19.87	16	>sp|P10153|RNAS2_HUMAN Non-secretory ribonuclease OS=Homo sapiens OX=9606 GN=RNASE2 PE=1 SV=2	14694	20210911_zy_urine_ethcd_1.6208.6208.4	controllerType=0 controllerNumber=1 scan=6208	27.8336
05529:4	5	K.NC[+57.021]HHSGSQVPLIHC[+57.021]N[+349.137]LTTPSPQN[+203.079]ISNC[+57.021]R.Y	HexNAc(1)Fuc(1),HexNAc(1)	C[+57]*3, N[+203][+349]	945.928	4	3780.69	3780.7	0	-3	97	Specific	1097.5	1044.02	51.87	19.87	16	>sp|P10153|RNAS2_HUMAN Non-secretory ribonuclease OS=Homo sapiens OX=9606 GN=RNASE2 PE=1 SV=2	14694	20210911_zy_urine_ethcd_1.6073.6073.4	controllerType=0 controllerNumber=1 scan=6073	27.2228
05340:4	5	K.NC[+57.021]HHSGSQVPLIHC[+57.021]N[+349.137]LTTPSPQN[+203.079]ISNC[+57.021]R.Y	HexNAc(1)Fuc(1),HexNAc(1)	C[+57]*3, N[+203][+349]	945.927	4	3780.69	3780.7	0	-3.6	97	Specific	1100.29	1013.89	81	21.12	16	>sp|P10153|RNAS2_HUMAN Non-secretory ribonuclease OS=Homo sapiens OX=9606 GN=RNASE2 PE=1 SV=2	14694	20210911_zy_urine_ethcd_1.5866.5866.4	controllerType=0 controllerNumber=1 scan=5866	26.3015
05739:4	5	K.NC[+57.021]HHSGSQVPLIHC[+57.021]N[+349.137]LTTPSPQN[+203.079]ISNC[+57.021]R.Y	HexNAc(1)Fuc(1),HexNAc(1)	C[+57]*3, N[+203][+349]	945.928	4	3780.69	3780.7	0	-2.7	97	Specific	1121.29	1095.29	102.67	21.11	16	>sp|P10153|RNAS2_HUMAN Non-secretory ribonuclease OS=Homo sapiens OX=9606 GN=RNASE2 PE=1 SV=2	14694	20210911_zy_urine_ethcd_1.6303.6303.4	controllerType=0 controllerNumber=1 scan=6303	28.2561
05465:4	5	K.NC[+57.021]HHSGSQVPLIHC[+57.021]N[+349.137]LTTPSPQN[+203.079]ISNC[+57.021]R.Y	HexNAc(1)Fuc(1),HexNAc(1)	C[+57]*3, N[+203][+349]	945.927	4	3780.69	3780.7	0	-3.5	97	Specific	1127.07	1072.37	71.23	20.87	16	>sp|P10153|RNAS2_HUMAN Non-secretory ribonuclease OS=Homo sapiens OX=9606 GN=RNASE2 PE=1 SV=2	14694	20210911_zy_urine_ethcd_1.6003.6003.4	controllerType=0 controllerNumber=1 scan=6003	26.9119
05329:4	5	K.NC[+57.021]HHSGSQVPLIHC[+57.021]N[+552.217]LTTPSPQN[+203.079]ISNC[+57.021]R.Y	HexNAc(2)Fuc(1),HexNAc(1)	C[+57]*3, N[+203][+552]	996.697	4	3983.77	3983.78	0	-3.5	97	Specific	1147.25	1050.9	142.49	20.87	16	>sp|P10153|RNAS2_HUMAN Non-secretory ribonuclease OS=Homo sapiens OX=9606 GN=RNASE2 PE=1 SV=2	14694	20210911_zy_urine_ethcd_1.5854.5854.4	controllerType=0 controllerNumber=1 scan=5854	26.2486
05393:4	5	K.NC[+57.021]HHSGSQVPLIHC[+57.021]N[+406.159]LTTPSPQN[+203.079]ISNC[+57.021]R.Y	HexNAc(2),HexNAc(1)	C[+57]*3, N[+203][+406]	960.185	4	3837.72	3837.72	0	-1.5	97	Specific	1165.92	1084.18	238.2	22.06	16	>sp|P10153|RNAS2_HUMAN Non-secretory ribonuclease OS=Homo sapiens OX=9606 GN=RNASE2 PE=1 SV=2	14694	20210911_zy_urine_ethcd_1.5924.5924.4	controllerType=0 controllerNumber=1 scan=5924	26.5648
05401:4	5	K.NC[+57.021]HHSGSQVPLIHC[+57.021]N[+349.137]LTTPSPQN[+203.079]ISNC[+57.021]R.Y	HexNAc(1)Fuc(1),HexNAc(1)	C[+57]*3, N[+203][+349]	945.928	4	3780.69	3780.7	0	-3.3	97	Specific	1176.93	1130.98	60.8	21.87	16	>sp|P10153|RNAS2_HUMAN Non-secretory ribonuclease OS=Homo sapiens OX=9606 GN=RNASE2 PE=1 SV=2	14694	20210911_zy_urine_ethcd_1.5933.5933.4	controllerType=0 controllerNumber=1 scan=5933	26.6043
05391:4	5	K.NC[+57.021]HHSGSQVPLIHC[+57.021]N[+552.217]LTTPSPQN[+203.079]ISNC[+57.021]R.Y	HexNAc(2)Fuc(1),HexNAc(1)	C[+57]*3, N[+203][+552]	996.697	4	3983.77	3983.78	0	-3.1	97	Specific	1177.34	1074.42	165.63	21.87	16	>sp|P10153|RNAS2_HUMAN Non-secretory ribonuclease OS=Homo sapiens OX=9606 GN=RNASE2 PE=1 SV=2	14694	20210911_zy_urine_ethcd_1.5922.5922.4	controllerType=0 controllerNumber=1 scan=5922	26.555
05590:4	5	K.NC[+57.021]HHSGSQVPLIHC[+57.021]N[+349.137]LTTPSPQN[+203.079]ISNC[+57.021]R.Y	HexNAc(1)Fuc(1),HexNAc(1)	C[+57]*3, N[+203][+349]	945.928	4	3780.69	3780.7	0	-3.4	97	Specific	1198.18	1152.84	68.76	21.87	16	>sp|P10153|RNAS2_HUMAN Non-secretory ribonuclease OS=Homo sapiens OX=9606 GN=RNASE2 PE=1 SV=2	14694	20210911_zy_urine_ethcd_1.6140.6140.4	controllerType=0 controllerNumber=1 scan=6140	27.5267
05518:4	5	K.NC[+57.021]HHSGSQVPLIHC[+57.021]N[+552.217]LTTPSPQN[+203.079]ISNC[+57.021]R.Y	HexNAc(2)Fuc(1),HexNAc(1)	C[+57]*3, N[+203][+552]	996.698	4	3983.77	3983.78	0	-2.4	97	Specific	1199.45	1139.35	101.22	22.11	16	>sp|P10153|RNAS2_HUMAN Non-secretory ribonuclease OS=Homo sapiens OX=9606 GN=RNASE2 PE=1 SV=2	14694	20210911_zy_urine_ethcd_1.6061.6061.4	controllerType=0 controllerNumber=1 scan=6061	27.1702
05454:4	5	K.NC[+57.021]HHSGSQVPLIHC[+57.021]N[+552.217]LTTPSPQN[+203.079]ISNC[+57.021]R.Y	HexNAc(2)Fuc(1),HexNAc(1)	C[+57]*3, N[+203][+552]	996.697	4	3983.77	3983.78	0	-3.3	97	Specific	1225.14	1106.29	131.54	22.87	16	>sp|P10153|RNAS2_HUMAN Non-secretory ribonuclease OS=Homo sapiens OX=9606 GN=RNASE2 PE=1 SV=2	14694	20210911_zy_urine_ethcd_1.5991.5991.4	controllerType=0 controllerNumber=1 scan=5991	26.8591

## Sheet: EThcD-R2
Query #:z	Protein Rank	Peptide < ProteinMetrics Confidential >	Glycans NHFAGNa	Modification Type(s)	Observed m/z	z	Observed (M+H)	Calc. mass (M+H)	Off-by-x error	Mass error (ppm)	Starting position	Cleavage	Score	Delta	Delta Mod	|Log Prob|	# of unique peptides	Protein Name	Protein DB number	Comment	Scan #	Scan Time
00828:3	58	R.N[+2059.735]YSHHQLNR.S	HexNAc(4)Hex(5)Fuc(1)NeuAc(1)	N[+2060]	1076.77	3	3228.28	3228.3	0	-3.5	169	Specific	200.52	11.11	11.11	1.45	5	>sp|Q14515|SPRL1_HUMAN SPARC-like protein 1 OS=Homo sapiens OX=9606 GN=SPARCL1 PE=1 SV=2	3147	20210911_zy_urine_ethcd_2.917.917.3	controllerType=0 controllerNumber=1 scan=917	4.3455
12209:3	24	R.C[+57.021]LNWLDAQSGLASAPVSGAGN[+2059.735]HSYC[+57.021]R.N	HexNAc(4)Hex(5)Fuc(1)NeuAc(1)	C[+57]*2, N[+2060]	1617.67	3	4850.99	4851	0	-2.3	46	Specific	200.75	84.7	84.7	4.69	6	>sp|Q96FE7|P3IP1_HUMAN Phosphoinositide-3-kinase-interacting protein 1 OS=Homo sapiens OX=9606 GN=PIK3IP1 PE=1 SV=2	11936	20210911_zy_urine_ethcd_2.13392.13392.3	controllerType=0 controllerNumber=1 scan=13392	60.0066
07162:3	130	R.LPTTVLN[+3007.058]ATAK.A	HexNAc(5)Hex(6)Fuc(1)NeuAc(3)	N[+3007]	1379.24	3	4135.71	4135.72	0	-2	331	Specific	200.83	70.58	70.58	0.98	4	>sp|Q9GZM5|YIPF3_HUMAN Protein YIPF3 OS=Homo sapiens OX=9606 GN=YIPF3 PE=1 SV=1	19367	20210911_zy_urine_ethcd_2.7862.7862.3	controllerType=0 controllerNumber=1 scan=7862	35.2845
01483:3	23	R.N[+2553.910]MTQGR.C	HexNAc(5)Hex(5)Fuc(1)NeuAc(2)	N[+2554]	1087.42	3	3260.23	3260.24	0	-2.8	62	Specific	200.96	23.2	23.2	1.45	28	>sp|P07998|RNAS1_HUMAN Ribonuclease pancreatic OS=Homo sapiens OX=9606 GN=RNASE1 PE=1 SV=4	14690	20210911_zy_urine_ethcd_2.1636.1636.3	controllerType=0 controllerNumber=1 scan=1636	7.65
00917:2	23	R.N[+1897.682]MTQGR.C	HexNAc(4)Hex(4)Fuc(1)NeuAc(1)	N[+1898]	1302.51	2	2604.01	2604.01	0	-1.6	62	Specific	201.6	58.03	58.03	2.08	28	>sp|P07998|RNAS1_HUMAN Ribonuclease pancreatic OS=Homo sapiens OX=9606 GN=RNASE1 PE=1 SV=4	14690	20210911_zy_urine_ethcd_2.1014.1014.2	controllerType=0 controllerNumber=1 scan=1014	4.7753
10048:3	6	R.QNQC[+57.021]FYN[+3081.095]SSYLNVQR.E	HexNAc(6)Hex(7)Fuc(1)NeuAc(2)	C[+57], N[+3081]	1668.33	3	5002.97	5001.96	1	0.4	87	Specific	201.77	97.87	54.91	3.74	28	>sp|P19652|A1AG2_HUMAN Alpha-1-acid glycoprotein 2 OS=Homo sapiens OX=9606 GN=ORM2 PE=1 SV=2	4531	20210911_zy_urine_ethcd_2.11022.11022.3	controllerType=0 controllerNumber=1 scan=11022	49.359
01307:3	14	K.N[+2100.761]NSDISSTR.G	HexNAc(5)Hex(4)Fuc(1)NeuAc(1)	N[+2101]	1032.08	3	3094.21	3094.22	0	-3.1	46	Specific	201.8	67.35	67.35	4.13	13	>sp|P01871|IGHM_HUMAN Immunoglobulin heavy constant mu OS=Homo sapiens OX=9606 GN=IGHM PE=1 SV=4	10127	20210911_zy_urine_ethcd_2.1443.1443.3	controllerType=0 controllerNumber=1 scan=1443	6.7633
14913:4	1	K.QDFN[+3372.190]ITDISLLEHR.L	HexNAc(6)Hex(7)Fuc(1)NeuAc(3)	N[+3372]	1268.76	4	5072.04	5073.05	-1	-2.1	319	Specific	201.93	91.82	91.82	3.95	52	>sp|P07911|UROM_HUMAN Uromodulin OS=Homo sapiens OX=9606 GN=UMOD PE=1 SV=1	16609	20210911_zy_urine_ethcd_2.16350.16350.4	controllerType=0 controllerNumber=1 scan=16350	73.0773
08846:3	83	R.IN[+2756.989]NSLSELR.R	HexNAc(6)Hex(5)Fuc(1)NeuAc(2)	N[+2757]	1268.19	3	3802.54	3802.55	0	-3.1	65	Specific	201.95	20.97	20.97	0.88	10	>sp|Q9Y5J3|HEY1_HUMAN Hairy/enhancer-of-split related with YRPW motif protein 1 OS=Homo sapiens OX=9606 GN=HEY1 PE=1 SV=1	12003	20210911_zy_urine_ethcd_2.9706.9706.3	controllerType=0 controllerNumber=1 scan=9706	43.4717
14055:4	10	R.QQQHLFGSN[+2350.830]VTDC[+57.021]SGNFC[+57.021]LFR.S	HexNAc(4)Hex(5)Fuc(1)NeuAc(2)	C[+57]*2, N[+2351]	1217.24	4	4865.94	4865.95	0	-3.5	622	Specific	202.09	156.85	40.26	4.59	19	>sp|P02787|TRFE_HUMAN Serotransferrin OS=Homo sapiens OX=9606 GN=TF PE=1 SV=3	18223	20210911_zy_urine_ethcd_2.15411.15411.4	controllerType=0 controllerNumber=1 scan=15411	68.9298
13668:3	2	R.QDQC[+57.021]IYN[+2935.037]TTYLNVQR.E	HexNAc(6)Hex(7)NeuAc(2)	C[+57], N[+2935]	1617.65	3	4850.93	4850.93	0	-1.4	87	Specific	202.29	71.45	71.45	4.55	59	>sp|P02763|A1AG1_HUMAN Alpha-1-acid glycoprotein 1 OS=Homo sapiens OX=9606 GN=ORM1 PE=1 SV=1	2208	20210911_zy_urine_ethcd_2.14988.14988.3	controllerType=0 controllerNumber=1 scan=14988	67.0658
14424:4	105	R.GAAN[+3737.322]DSTQFTVAGR.M	HexNAc(7)Hex(8)Fuc(1)NeuAc(3)	N[+3737]	1283.75	4	5131.97	5131.99	0	-3.2	1204	Specific	202.33	29.35	29.35	0.6	5	>sp|O95425|SVIL_HUMAN Supervillin OS=Homo sapiens OX=9606 GN=SVIL PE=1 SV=2	13681	20210911_zy_urine_ethcd_2.15814.15814.4	controllerType=0 controllerNumber=1 scan=15814	70.7163
04947:3	5	R.FGC[+57.021]EIENN[+3007.058]R.S	HexNAc(5)Hex(6)Fuc(1)NeuAc(3)	C[+57], N[+3007]	1382.85	3	4146.53	4145.55	1	-6.2	121	Specific	202.46	61.06	61.06	4.03	36	>sp|P25311|ZA2G_HUMAN Zinc-alpha-2-glycoprotein OS=Homo sapiens OX=9606 GN=AZGP1 PE=1 SV=2	18783	20210911_zy_urine_ethcd_2.5436.5436.3	controllerType=0 controllerNumber=1 scan=5436	24.5008
12585:3	2	R.QDQC[+57.021]IYN[+2569.905]TTYLNVQR.E	HexNAc(5)Hex(6)NeuAc(2)	C[+57], N[+2570]	1495.94	3	4485.8	4485.8	0	0.3	87	Specific	202.66	102.36	102.36	3.92	59	>sp|P02763|A1AG1_HUMAN Alpha-1-acid glycoprotein 1 OS=Homo sapiens OX=9606 GN=ORM1 PE=1 SV=1	2208	20210911_zy_urine_ethcd_2.13803.13803.3	controllerType=0 controllerNumber=1 scan=13803	61.8362
01514:3	23	K.SN[+3081.095]SSM[+15.995]HITDC[+57.021]R.L	HexNAc(6)Hex(7)Fuc(1)NeuAc(2)	C[+57], M[+16], N[+3081]	1468.88	3	4404.63	4404.64	0	-1.1	103	Specific	202.75	61.46	61.46	2.42	28	>sp|P07998|RNAS1_HUMAN Ribonuclease pancreatic OS=Homo sapiens OX=9606 GN=RNASE1 PE=1 SV=4	14690	20210911_zy_urine_ethcd_2.1670.1670.3	controllerType=0 controllerNumber=1 scan=1670	7.8044
14184:4	2	R.QDQC[+57.021]IYN[+3517.228]TTYLNVQR.E	HexNAc(6)Hex(7)NeuAc(4)	C[+57], N[+3517]	1358.79	4	5432.15	5433.12	-1	4.6	87	Specific	203.04	75.44	75.44	4.13	59	>sp|P02763|A1AG1_HUMAN Alpha-1-acid glycoprotein 1 OS=Homo sapiens OX=9606 GN=ORM1 PE=1 SV=1	2208	20210911_zy_urine_ethcd_2.15552.15552.4	controllerType=0 controllerNumber=1 scan=15552	69.5427
06486:3	35	K.AEFN[+2174.798]ITLIHPK.D	HexNAc(6)Hex(5)Fuc(1)	N[+2175]	1153.17	3	3457.51	3457.51	0	-1.7	231	Specific	203.2	103.84	103.84	2.58	9	>sp|P15144|AMPN_HUMAN Aminopeptidase N OS=Homo sapiens OX=9606 GN=ANPEP PE=1 SV=4	1209	20210911_zy_urine_ethcd_2.7121.7121.3	controllerType=0 controllerNumber=1 scan=7121	31.9923
02754:2	9	R.EEQFN[+1444.534]STFR.V	HexNAc(4)Hex(3)Fuc(1)	N[+1445]	1301.53	2	2602.05	2602.06	0	-1.2	172	Specific	203.26	64.81	64.81	2.98	31	>sp|P01859|IGHG2_HUMAN Immunoglobulin heavy constant gamma 2 OS=Homo sapiens OX=9606 GN=IGHG2 PE=1 SV=2	2858	20210911_zy_urine_ethcd_2.3029.3029.2	controllerType=0 controllerNumber=1 scan=3029	13.6497
01198:3	6	R.EN[+2350.830]GTVSR.Y	HexNAc(4)Hex(5)Fuc(1)NeuAc(2)	N[+2351]	1038.4	3	3113.2	3113.2	0	-2.6	102	Specific	203.49	25.1	25.1	2.22	28	>sp|P19652|A1AG2_HUMAN Alpha-1-acid glycoprotein 2 OS=Homo sapiens OX=9606 GN=ORM2 PE=1 SV=2	4531	20210911_zy_urine_ethcd_2.1323.1323.3	controllerType=0 controllerNumber=1 scan=1323	6.2044
11550:3	8	R.ADGTVNQIEGEATPVN[+2715.963]LTEPAK.L	HexNAc(5)Hex(6)Fuc(1)NeuAc(2)	N[+2716]	1657.04	3	4969.09	4970.08	-1	3.1	83	Specific	203.58	126.31	126.31	4.15	20	>sp|P05090|APOD_HUMAN Apolipoprotein D OS=Homo sapiens OX=9606 GN=APOD PE=1 SV=1	120	20210911_zy_urine_ethcd_2.12669.12669.3	controllerType=0 controllerNumber=1 scan=12669	56.7367
09927:3	132	K.FVGTPEVN[+2350.830]QTTLYQR.Y	HexNAc(4)Hex(5)Fuc(1)NeuAc(2)	N[+2351]	1368.92	3	4104.74	4103.72	1	2.5	46	Specific	203.77	88.42	42.6	0.76	3	>sp|P01033|TIMP1_HUMAN Metalloproteinase inhibitor 1 OS=Homo sapiens OX=9606 GN=TIMP1 PE=1 SV=1	16130	20210911_zy_urine_ethcd_2.10890.10890.3	controllerType=0 controllerNumber=1 scan=10890	48.7764
12106:4	2	R.QDQC[+57.021]IYN[+3517.228]TTYLNVQR.E	HexNAc(6)Hex(7)NeuAc(4)	C[+57], N[+3517]	1359.03	4	5433.11	5433.12	0	-3	87	Specific	203.91	57.61	57.61	4.61	59	>sp|P02763|A1AG1_HUMAN Alpha-1-acid glycoprotein 1 OS=Homo sapiens OX=9606 GN=ORM1 PE=1 SV=1	2208	20210911_zy_urine_ethcd_2.13279.13279.4	controllerType=0 controllerNumber=1 scan=13279	59.5086
05677:3	5	K.DIVEYYNDSN[+2627.947]GSHVLQGR.F	HexNAc(6)Hex(6)Fuc(1)NeuAc(1)	N[+2628]	1565.64	3	4694.91	4693.9	1	0.3	103	Specific	203.98	55.43	46.66	3.74	36	>sp|P25311|ZA2G_HUMAN Zinc-alpha-2-glycoprotein OS=Homo sapiens OX=9606 GN=AZGP1 PE=1 SV=2	18783	20210911_zy_urine_ethcd_2.6235.6235.3	controllerType=0 controllerNumber=1 scan=6235	28.0489
14895:3	1	R.FALLMTNC[+57.021]YATPSSN[+2553.910]ATDPLK.Y	HexNAc(5)Hex(5)Fuc(1)NeuAc(2)	C[+57], N[+2554]	1623.67	3	4869	4869.01	0	-2.2	499	Specific	204.6	116.01	116.01	5.02	52	>sp|P07911|UROM_HUMAN Uromodulin OS=Homo sapiens OX=9606 GN=UMOD PE=1 SV=1	16609	20210911_zy_urine_ethcd_2.16330.16330.3	controllerType=0 controllerNumber=1 scan=16330	72.9877
01834:3	13	R.EEQFN[+1768.640]STYR.V	HexNAc(4)Hex(5)Fuc(1)	N[+1769]	981.389	3	2942.15	2942.16	0	-1.8	173	Specific	204.66	69.03	69.03	4.16	17	>sp|P01861|IGHG4_HUMAN Immunoglobulin heavy constant gamma 4 OS=Homo sapiens OX=9606 GN=IGHG4 PE=1 SV=1	12793	20210911_zy_urine_ethcd_2.2020.2020.3	controllerType=0 controllerNumber=1 scan=2020	9.3173
02869:3	18	K.AAIPSALDTN[+1784.634]SSK.S	HexNAc(4)Hex(6)	N[+1785]	1020.43	3	3059.29	3059.29	0	-2.3	542	Specific	204.68	108.39	108.39	4.3	17	>sp|Q08380|LG3BP_HUMAN Galectin-3-binding protein OS=Homo sapiens OX=9606 GN=LGALS3BP PE=1 SV=1	4876	20210911_zy_urine_ethcd_2.3154.3154.3	controllerType=0 controllerNumber=1 scan=3154	14.2043
08705:3	43	R.ISMC[+57.021]QNLGYN[+2204.772]VTK.M	HexNAc(4)Hex(5)NeuAc(2)	C[+57], N[+2205]	1244.84	3	3732.5	3732.5	0	-1	50	Specific	204.78	91.53	91.53	3.64	5	>sp|Q9ULV1|FZD4_HUMAN Frizzled-4 OS=Homo sapiens OX=9606 GN=FZD4 PE=1 SV=2	20281	20210911_zy_urine_ethcd_2.9551.9551.3	controllerType=0 controllerNumber=1 scan=9551	42.7789
03346:3	3	K.TPLTAN[+2100.761]ITK.S	HexNAc(5)Hex(4)Fuc(1)NeuAc(1)	N[+2101]	1020.44	3	3059.31	3059.32	0	-3	200	Specific	204.92	72.08	72.08	4.13	39	>sp|P01877|IGHA2_HUMAN Immunoglobulin heavy constant alpha 2 OS=Homo sapiens OX=9606 GN=IGHA2 PE=1 SV=4	10403	20210911_zy_urine_ethcd_2.3679.3679.3	controllerType=0 controllerNumber=1 scan=3679	16.5571
01543:3	23	R.N[+2350.830]MTQGR.C	HexNAc(4)Hex(5)Fuc(1)NeuAc(2)	N[+2351]	1019.72	3	3057.15	3057.16	0	-2.7	62	Specific	205.12	17.19	17.19	0.86	28	>sp|P07998|RNAS1_HUMAN Ribonuclease pancreatic OS=Homo sapiens OX=9606 GN=RNASE1 PE=1 SV=4	14690	20210911_zy_urine_ethcd_2.1702.1702.3	controllerType=0 controllerNumber=1 scan=1702	7.9495
03067:3	3	K.TPLTAN[+2059.735]ITK.S	HexNAc(4)Hex(5)Fuc(1)NeuAc(1)	N[+2060]	1006.77	3	3018.28	3018.29	0	-2.4	200	Specific	205.51	56.48	56.48	4.09	39	>sp|P01877|IGHA2_HUMAN Immunoglobulin heavy constant alpha 2 OS=Homo sapiens OX=9606 GN=IGHA2 PE=1 SV=4	10403	20210911_zy_urine_ethcd_2.3372.3372.3	controllerType=0 controllerNumber=1 scan=3372	15.1893
14015:3	100	K.PVIN[+3009.074]STPGRTPLR.D	HexNAc(7)Hex(8)NeuAc(1)	N[+3009]	1472.63	3	4415.86	4416.88	-1	-3.1	433	Specific	205.51	42.06	1.37	0.54	4	>sp|Q99459|CDC5L_HUMAN Cell division cycle 5-like protein OS=Homo sapiens OX=9606 GN=CDC5L PE=1 SV=2	3742	20210911_zy_urine_ethcd_2.15367.15367.4	controllerType=0 controllerNumber=1 scan=15367	68.7309
05103:3	4	K.ELHHLQEQN[+2059.735]VSNAFLDK.G	HexNAc(4)Hex(5)Fuc(1)NeuAc(1)	N[+2060]	1360.91	3	4080.72	4081.74	-1	-4.5	754	Specific	205.57	58.79	58.79	3.52	27	>sp|P00450|CERU_HUMAN Ceruloplasmin OS=Homo sapiens OX=9606 GN=CP PE=1 SV=1	460	20210911_zy_urine_ethcd_2.5607.5607.3	controllerType=0 controllerNumber=1 scan=5607	25.2652
05660:3	4	K.EHEGAIYPDN[+2350.830]TTDFQR.A	HexNAc(4)Hex(5)Fuc(1)NeuAc(2)	N[+2351]	1414.9	3	4242.67	4243.67	-1	1.2	129	Specific	205.6	74.42	74.42	3.59	27	>sp|P00450|CERU_HUMAN Ceruloplasmin OS=Homo sapiens OX=9606 GN=CP PE=1 SV=1	460	20210911_zy_urine_ethcd_2.6216.6216.3	controllerType=0 controllerNumber=1 scan=6216	27.9653
01482:3	23	R.N[+2715.963]MTQGR.C	HexNAc(5)Hex(6)Fuc(1)NeuAc(2)	N[+2716]	1141.44	3	3422.29	3422.29	0	-0.2	62	Specific	205.63	8.73	8.73	0.12	28	>sp|P07998|RNAS1_HUMAN Ribonuclease pancreatic OS=Homo sapiens OX=9606 GN=RNASE1 PE=1 SV=4	14690	20210911_zy_urine_ethcd_2.1635.1635.3	controllerType=0 controllerNumber=1 scan=1635	7.6454
02617:2	9	R.EEQFN[+1241.454]STFR.V	HexNAc(3)Hex(3)Fuc(1)	N[+1241]	1199.99	2	2398.97	2398.98	0	-1.5	172	Specific	205.71	86.75	86.75	4.06	31	>sp|P01859|IGHG2_HUMAN Immunoglobulin heavy constant gamma 2 OS=Homo sapiens OX=9606 GN=IGHG2 PE=1 SV=2	2858	20210911_zy_urine_ethcd_2.2877.2877.2	controllerType=0 controllerNumber=1 scan=2877	13.014
05926:3	63	R.MDGSLNFN[+2350.830]R.T	HexNAc(4)Hex(5)Fuc(1)NeuAc(2)	N[+2351]	1135.44	3	3404.3	3404.31	0	-3	679	Specific	205.8	42.55	42.55	2.32	3	>sp|P02671|FIBA_HUMAN Fibrinogen alpha chain OS=Homo sapiens OX=9606 GN=FGA PE=1 SV=2	9171	20210911_zy_urine_ethcd_2.6507.6507.3	controllerType=0 controllerNumber=1 scan=6507	29.2588
12676:3	15	K.VPGN[+2100.761]VTAVLGETLK.V	HexNAc(5)Hex(4)Fuc(1)NeuAc(1)	N[+2101]	1166.86	3	3498.55	3498.56	0	-3	466	Specific	205.91	71.98	71.98	4.07	13	>sp|P01833|PIGR_HUMAN Polymeric immunoglobulin receptor OS=Homo sapiens OX=9606 GN=PIGR PE=1 SV=4	10083	20210911_zy_urine_ethcd_2.13903.13903.3	controllerType=0 controllerNumber=1 scan=13903	62.2673
01189:3	14	K.N[+2018.708]NSDISSTR.G	HexNAc(3)Hex(6)Fuc(1)NeuAc(1)	N[+2019]	1004.73	3	3012.16	3012.17	0	-1.8	46	Specific	205.92	44.81	44.81	4.09	13	>sp|P01871|IGHM_HUMAN Immunoglobulin heavy constant mu OS=Homo sapiens OX=9606 GN=IGHM PE=1 SV=4	10127	20210911_zy_urine_ethcd_2.1313.1313.3	controllerType=0 controllerNumber=1 scan=1313	6.1593
02690:2	9	R.EEQFN[+1444.534]STFR.V	HexNAc(4)Hex(3)Fuc(1)	N[+1445]	1301.53	2	2602.05	2602.06	0	-2.3	172	Specific	206.11	59.5	59.5	2.88	31	>sp|P01859|IGHG2_HUMAN Immunoglobulin heavy constant gamma 2 OS=Homo sapiens OX=9606 GN=IGHG2 PE=1 SV=2	2858	20210911_zy_urine_ethcd_2.2958.2958.2	controllerType=0 controllerNumber=1 scan=2958	13.3476
04861:3	25	K.AN[+1809.666]LSQVADHLDHIK.E	HexNAc(5)Hex(4)Fuc(1)	N[+1810]	1124.16	3	3370.47	3370.48	0	-2.8	278	Specific	206.43	63.42	63.42	2.72	12	>sp|P16444|DPEP1_HUMAN Dipeptidase 1 OS=Homo sapiens OX=9606 GN=DPEP1 PE=1 SV=3	2717	20210911_zy_urine_ethcd_2.5341.5341.3	controllerType=0 controllerNumber=1 scan=5341	24.071
07669:3	34	K.NYHQPAILN[+2350.830]SSALR.Q	HexNAc(4)Hex(5)Fuc(1)NeuAc(2)	N[+2351]	1312.22	3	3934.65	3934.66	0	-2.4	41	Specific	206.7	74.61	74.61	4.31	5	>sp|Q16769|QPCT_HUMAN Glutaminyl-peptide cyclotransferase OS=Homo sapiens OX=9606 GN=QPCT PE=1 SV=1	12985	20210911_zy_urine_ethcd_2.8418.8418.3	controllerType=0 controllerNumber=1 scan=8418	37.7632
12226:3	71	K.AFN[+2350.830]STLPTMAQMEK.A	HexNAc(4)Hex(5)Fuc(1)NeuAc(2)	N[+2351]	1307.2	3	3919.57	3919.58	0	-0.5	55	Specific	206.88	92.07	92.07	1.41	2	>sp|P16070|CD44_HUMAN CD44 antigen OS=Homo sapiens OX=9606 GN=CD44 PE=1 SV=3	1144	20210911_zy_urine_ethcd_2.13411.13411.3	controllerType=0 controllerNumber=1 scan=13411	60.0906
01386:2	23	R.N[+1694.603]MTQGR.C	HexNAc(3)Hex(4)Fuc(1)NeuAc(1)	N[+1695]	1200.97	2	2400.93	2400.93	0	-0.9	62	Specific	206.96	72.54	72.54	2.1	28	>sp|P07998|RNAS1_HUMAN Ribonuclease pancreatic OS=Homo sapiens OX=9606 GN=RNASE1 PE=1 SV=4	14690	20210911_zy_urine_ethcd_2.1530.1530.2	controllerType=0 controllerNumber=1 scan=1530	7.1697
07579:3	65	R.GGYIFPTQQPN[+2481.889]TTTLASR.K	HexNAc(6)Hex(6)NeuAc(1)	N[+2482]	1478.97	3	4434.88	4433.88	1	0.6	817	Specific	207.33	102.99	102.99	2.49	5	>sp|O43451|MGA_HUMAN Maltase-glucoamylase, intestinal OS=Homo sapiens OX=9606 GN=MGAM PE=1 SV=5	7929	20210911_zy_urine_ethcd_2.8319.8319.3	controllerType=0 controllerNumber=1 scan=8319	37.3131
06119:3	41	R.EN[+2350.830]ISDPTSPLR.T	HexNAc(4)Hex(5)Fuc(1)NeuAc(2)	N[+2351]	1193.82	3	3579.44	3579.45	0	-2.9	70	Specific	207.39	72.69	72.69	2.73	7	>sp|P01591|IGJ_HUMAN Immunoglobulin J chain OS=Homo sapiens OX=9606 GN=JCHAIN PE=1 SV=4	4401	20210911_zy_urine_ethcd_2.6719.6719.3	controllerType=0 controllerNumber=1 scan=6719	30.2084
03611:2	9	R.EEQFN[+1241.454]STFR.V	HexNAc(3)Hex(3)Fuc(1)	N[+1241]	1199.99	2	2398.98	2398.98	0	-0.6	172	Specific	207.44	78.6	78.6	2.59	31	>sp|P01859|IGHG2_HUMAN Immunoglobulin heavy constant gamma 2 OS=Homo sapiens OX=9606 GN=IGHG2 PE=1 SV=2	2858	20210911_zy_urine_ethcd_2.3970.3970.2	controllerType=0 controllerNumber=1 scan=3970	17.8647
04147:2	47	R.DIENFN[+2204.772]STQK.F	HexNAc(4)Hex(5)NeuAc(2)	N[+2205]	1700.67	2	3400.33	3400.33	0	-0.4	28	Specific	207.61	58.31	58.31	2.28	6	>sp|P43652|AFAM_HUMAN Afamin OS=Homo sapiens OX=9606 GN=AFM PE=1 SV=1	20367	20210911_zy_urine_ethcd_2.4558.4558.4	controllerType=0 controllerNumber=1 scan=4558	20.5389
13781:3	2	R.QDQC[+57.021]IYN[+2569.905]TTYLNVQR.E	HexNAc(5)Hex(6)NeuAc(2)	C[+57], N[+2570]	1495.6	3	4484.79	4485.8	-1	-1.1	87	Specific	207.66	88.8	88.8	4.41	59	>sp|P02763|A1AG1_HUMAN Alpha-1-acid glycoprotein 1 OS=Homo sapiens OX=9606 GN=ORM1 PE=1 SV=1	2208	20210911_zy_urine_ethcd_2.15111.15111.4	controllerType=0 controllerNumber=1 scan=15111	67.6102
01246:2	23	R.LTN[+2350.830]GSR.Y	HexNAc(4)Hex(5)Fuc(1)NeuAc(2)	N[+2351]	1499.59	2	2998.18	2998.18	0	-0.4	114	Specific	207.71	2.04	2.04	0.15	28	>sp|P07998|RNAS1_HUMAN Ribonuclease pancreatic OS=Homo sapiens OX=9606 GN=RNASE1 PE=1 SV=4	14690	20210911_zy_urine_ethcd_2.1375.1375.2	controllerType=0 controllerNumber=1 scan=1375	6.4475
01711:3	23	R.LTN[+3007.058]GSR.Y	HexNAc(5)Hex(6)Fuc(1)NeuAc(3)	N[+3007]	1218.8	3	3654.4	3654.41	0	-1.4	114	Specific	207.81	0.04	0.04	0.88	28	>sp|P07998|RNAS1_HUMAN Ribonuclease pancreatic OS=Homo sapiens OX=9606 GN=RNASE1 PE=1 SV=4	14690	20210911_zy_urine_ethcd_2.1886.1886.3	controllerType=0 controllerNumber=1 scan=1886	8.7287
11951:3	99	K.GSQWSDIEEFC[+57.021]N[+2204.772]R.S	HexNAc(4)Hex(5)NeuAc(2)	C[+57], N[+2205]	1278.15	3	3832.45	3832.45	0	-1.1	84	Specific	207.96	71.69	71.69	1.75	1	>sp|P08174|DAF_HUMAN Complement decay-accelerating factor OS=Homo sapiens OX=9606 GN=CD55 PE=1 SV=4	3955	20210911_zy_urine_ethcd_2.13110.13110.3	controllerType=0 controllerNumber=1 scan=13110	58.7563
01068:3	23	K.SN[+2789.999]SSM[+15.995]HITDC[+57.021]R.L	HexNAc(6)Hex(7)Fuc(1)NeuAc(1)	C[+57], M[+16], N[+2790]	1371.85	3	4113.54	4113.54	0	-0.8	103	Specific	208.38	48.37	48.37	2.4	28	>sp|P07998|RNAS1_HUMAN Ribonuclease pancreatic OS=Homo sapiens OX=9606 GN=RNASE1 PE=1 SV=4	14690	20210911_zy_urine_ethcd_2.1180.1180.3	controllerType=0 controllerNumber=1 scan=1180	5.5402
06303:4	7	K.NC[+57.021]HHSGSQVPLIHC[+57.021]NLTTPSPQN[+2059.735]ISNC[+57.021]R.Y	HexNAc(4)Hex(5)Fuc(1)NeuAc(1)	C[+57]*3, N[+2060]	1322.8	4	5288.19	5288.22	0	-5	97	Specific	208.58	129.95	20.78	5.09	19	>sp|P10153|RNAS2_HUMAN Non-secretory ribonuclease OS=Homo sapiens OX=9606 GN=RNASE2 PE=1 SV=2	14694	20210911_zy_urine_ethcd_2.6920.6920.4	controllerType=0 controllerNumber=1 scan=6920	31.1067
00767:3	23	R.RN[+2059.735]MTQGR.C	HexNAc(4)Hex(5)Fuc(1)NeuAc(1)	N[+2060]	974.725	3	2922.16	2922.17	0	-2	61	Specific	208.69	67.92	67.92	2.7	28	>sp|P07998|RNAS1_HUMAN Ribonuclease pancreatic OS=Homo sapiens OX=9606 GN=RNASE1 PE=1 SV=4	14690	20210911_zy_urine_ethcd_2.850.850.3	controllerType=0 controllerNumber=1 scan=850	4.0408
00935:3	23	R.N[+2424.867]MTQGR.C	HexNAc(5)Hex(6)Fuc(1)NeuAc(1)	N[+2425]	1044.4	3	3131.19	3131.2	0	-3.2	62	Specific	208.79	41.84	41.84	1.95	28	>sp|P07998|RNAS1_HUMAN Ribonuclease pancreatic OS=Homo sapiens OX=9606 GN=RNASE1 PE=1 SV=4	14690	20210911_zy_urine_ethcd_2.1034.1034.3	controllerType=0 controllerNumber=1 scan=1034	4.8618
03019:2	28	K.FLN[+1913.677]ESYK.H	HexNAc(4)Hex(5)NeuAc(1)	N[+1914]	1407.56	2	2814.12	2814.12	0	-1.6	92	Specific	208.79	68.46	68.46	3.16	11	>sp|P15309|PPAP_HUMAN Prostatic acid phosphatase OS=Homo sapiens OX=9606 GN=ACPP PE=1 SV=3	14195	20210911_zy_urine_ethcd_2.3319.3319.2	controllerType=0 controllerNumber=1 scan=3319	14.9402
12403:3	71	K.AFN[+2350.830]STLPTMAQMEK.A	HexNAc(4)Hex(5)Fuc(1)NeuAc(2)	N[+2351]	1307.2	3	3919.57	3919.58	0	-0.6	55	Specific	209.03	77.58	77.58	2.11	2	>sp|P16070|CD44_HUMAN CD44 antigen OS=Homo sapiens OX=9606 GN=CD44 PE=1 SV=3	1144	20210911_zy_urine_ethcd_2.13604.13604.3	controllerType=0 controllerNumber=1 scan=13604	60.9512
12968:3	10	K.C[+57.021]GLVPVLAENYN[+2204.772]K.S	HexNAc(4)Hex(5)NeuAc(2)	C[+57], N[+2205]	1227.84	3	3681.51	3681.52	0	-3.8	421	Specific	209.28	85.76	85.76	3.35	19	>sp|P02787|TRFE_HUMAN Serotransferrin OS=Homo sapiens OX=9606 GN=TF PE=1 SV=3	18223	20210911_zy_urine_ethcd_2.14222.14222.3	controllerType=0 controllerNumber=1 scan=14222	63.6791
10826:3	67	K.N[+2204.772]GSLFAFR.G	HexNAc(4)Hex(5)NeuAc(2)	N[+2205]	1039.42	3	3116.24	3116.25	0	-3	169	Specific	209.67	57.87	57.87	0.93	3	>sp|P04004|VTNC_HUMAN Vitronectin OS=Homo sapiens OX=9606 GN=VTN PE=1 SV=1	17960	20210911_zy_urine_ethcd_2.11875.11875.3	controllerType=0 controllerNumber=1 scan=11875	53.1591
03723:3	31	R.SLHVPGLN[+2424.867]K.T	HexNAc(5)Hex(6)Fuc(1)NeuAc(1)	N[+2425]	1130.48	3	3389.41	3389.42	0	-3.2	191	Specific	209.75	42.97	42.97	3.44	5	>sp|P30530|UFO_HUMAN Tyrosine-protein kinase receptor UFO OS=Homo sapiens OX=9606 GN=AXL PE=1 SV=4	18964	20210911_zy_urine_ethcd_2.4093.4093.3	controllerType=0 controllerNumber=1 scan=4093	18.4348
10516:3	1	R.C[+57.021]NTAAPMWLN[+2204.772]GTHPSSDEGIVSR.K	HexNAc(4)Hex(5)NeuAc(2)	C[+57], N[+2205]	1568.64	3	4703.89	4704.91	-1	-2.6	223	Specific	210	80.52	80.52	5.63	52	>sp|P07911|UROM_HUMAN Uromodulin OS=Homo sapiens OX=9606 GN=UMOD PE=1 SV=1	16609	20210911_zy_urine_ethcd_2.11535.11535.3	controllerType=0 controllerNumber=1 scan=11535	51.647
01546:2	22	R.EEQYN[+1768.640]STYR.V	HexNAc(4)Hex(5)Fuc(1)	N[+1769]	1479.58	2	2958.15	2958.15	0	-1.7	295	Specific	210.24	75.26	75.26	4.2	10	>sp|P0DOX5|IGG1_HUMAN Immunoglobulin gamma-1 heavy chain OS=Homo sapiens OX=9606 PE=1 SV=2	10252	20210911_zy_urine_ethcd_2.1706.1706.2	controllerType=0 controllerNumber=1 scan=1706	7.9646
04411:3	69	R.KFDVNQLQN[+1727.613]TTIK.R	HexNAc(3)Hex(6)Fuc(1)	N[+1728]	1092.82	3	3276.45	3276.45	0	-0.7	706	Specific	210.46	141.93	141.93	2.11	6	>sp|P12821|ACE_HUMAN Angiotensin-converting enzyme OS=Homo sapiens OX=9606 GN=ACE PE=1 SV=1	527	20210911_zy_urine_ethcd_2.4848.4848.3	controllerType=0 controllerNumber=1 scan=4848	21.8552
14269:3	39	K.ALPQPQN[+2204.772]VTSLLGC[+57.021]TH.-	HexNAc(4)Hex(5)NeuAc(2)	C[+57], N[+2205]	1314.22	3	3940.64	3940.65	0	-2.9	447	CRagged	210.68	93.21	93.21	4.49	6	>sp|P02790|HEMO_HUMAN Hemopexin OS=Homo sapiens OX=9606 GN=HPX PE=1 SV=2	9336	20210911_zy_urine_ethcd_2.15645.15645.3	controllerType=0 controllerNumber=1 scan=15645	69.9594
01571:3	73	K.VSN[+2350.830]YSR.G	HexNAc(4)Hex(5)Fuc(1)NeuAc(2)	N[+2351]	1026.07	3	3076.18	3076.19	0	-2.3	199	Specific	210.72	19.35	19.35	0.53	5	>sp|P15328|FOLR1_HUMAN Folate receptor alpha OS=Homo sapiens OX=9606 GN=FOLR1 PE=1 SV=3	2914	20210911_zy_urine_ethcd_2.1733.1733.3	controllerType=0 controllerNumber=1 scan=1733	8.0719
05301:3	8	R.C[+57.021]IQAN[+2204.772]YSLM[+15.995]ENGK.I	HexNAc(4)Hex(5)NeuAc(2)	C[+57], M[+16], N[+2205]	1250.15	3	3748.45	3748.46	0	-3	61	Specific	210.87	28.17	28.17	2.42	20	>sp|P05090|APOD_HUMAN Apolipoprotein D OS=Homo sapiens OX=9606 GN=APOD PE=1 SV=1	120	20210911_zy_urine_ethcd_2.5824.5824.3	controllerType=0 controllerNumber=1 scan=5824	26.2345
03701:3	9	R.EEQFN[+1897.682]STFR.V	HexNAc(4)Hex(4)Fuc(1)NeuAc(1)	N[+1898]	1019.07	3	3055.2	3055.2	0	-1.1	172	Specific	210.88	62.72	62.72	3.94	31	>sp|P01859|IGHG2_HUMAN Immunoglobulin heavy constant gamma 2 OS=Homo sapiens OX=9606 GN=IGHG2 PE=1 SV=2	2858	20210911_zy_urine_ethcd_2.4069.4069.3	controllerType=0 controllerNumber=1 scan=4069	18.3248
09921:3	132	K.FVGTPEVN[+2350.830]QTTLYQR.Y	HexNAc(4)Hex(5)Fuc(1)NeuAc(2)	N[+2351]	1368.58	3	4103.72	4103.72	0	-0.4	46	Specific	210.99	54.7	54.7	1.33	3	>sp|P01033|TIMP1_HUMAN Metalloproteinase inhibitor 1 OS=Homo sapiens OX=9606 GN=TIMP1 PE=1 SV=1	16130	20210911_zy_urine_ethcd_2.10883.10883.3	controllerType=0 controllerNumber=1 scan=10883	48.7466
03270:3	3	K.TPLTAN[+2059.735]ITK.S	HexNAc(4)Hex(5)Fuc(1)NeuAc(1)	N[+2060]	1006.77	3	3018.29	3018.29	0	-0.8	200	Specific	211.05	66.23	66.23	3.94	39	>sp|P01877|IGHA2_HUMAN Immunoglobulin heavy constant alpha 2 OS=Homo sapiens OX=9606 GN=IGHA2 PE=1 SV=4	10403	20210911_zy_urine_ethcd_2.3596.3596.3	controllerType=0 controllerNumber=1 scan=3596	16.1832
04909:3	5	R.FGC[+57.021]EIENN[+2861.000]R.S	HexNAc(5)Hex(6)NeuAc(3)	C[+57], N[+2861]	1333.83	3	3999.49	3999.49	0	-1.2	121	Specific	211.06	33.95	33.95	2.4	36	>sp|P25311|ZA2G_HUMAN Zinc-alpha-2-glycoprotein OS=Homo sapiens OX=9606 GN=AZGP1 PE=1 SV=2	18783	20210911_zy_urine_ethcd_2.5394.5394.3	controllerType=0 controllerNumber=1 scan=5394	24.3132
04274:3	28	K.FLN[+2350.830]ESYK.H	HexNAc(4)Hex(5)Fuc(1)NeuAc(2)	N[+2351]	1084.43	3	3251.27	3251.28	0	-2.1	92	Specific	211.1	16.49	16.49	1.44	11	>sp|P15309|PPAP_HUMAN Prostatic acid phosphatase OS=Homo sapiens OX=9606 GN=ACPP PE=1 SV=3	14195	20210911_zy_urine_ethcd_2.4698.4698.3	controllerType=0 controllerNumber=1 scan=4698	21.1745
07913:3	6	R.QNQC[+57.021]FYN[+2424.867]SSYLNVQR.E	HexNAc(5)Hex(6)Fuc(1)NeuAc(1)	C[+57], N[+2425]	1449.25	3	4345.73	4345.73	0	-0.2	87	Specific	211.15	102.24	102.24	4.1	28	>sp|P19652|A1AG2_HUMAN Alpha-1-acid glycoprotein 2 OS=Homo sapiens OX=9606 GN=ORM2 PE=1 SV=2	4531	20210911_zy_urine_ethcd_2.8685.8685.3	controllerType=0 controllerNumber=1 scan=8685	38.9572
06228:3	11	R.ITYSIVQTN[+2350.830]C[+57.021]SK.E	HexNAc(4)Hex(5)Fuc(1)NeuAc(2)	C[+57], N[+2351]	1255.51	3	3764.52	3764.53	0	-2.9	197	Specific	211.64	69.93	69.93	3.41	27	>sp|P01042|KNG1_HUMAN Kininogen-1 OS=Homo sapiens OX=9606 GN=KNG1 PE=1 SV=2	6533	20210911_zy_urine_ethcd_2.6838.6838.3	controllerType=0 controllerNumber=1 scan=6838	30.7398
01910:3	47	K.FN[+2204.772]ETTEK.S	HexNAc(4)Hex(5)NeuAc(2)	N[+2205]	1025.06	3	3073.17	3073.18	0	-3	401	Specific	212	60.87	60.87	2.99	6	>sp|P43652|AFAM_HUMAN Afamin OS=Homo sapiens OX=9606 GN=AFM PE=1 SV=1	20367	20210911_zy_urine_ethcd_2.2103.2103.3	controllerType=0 controllerNumber=1 scan=2103	9.6516
04114:3	25	R.AN[+1971.719]LTTLAGTHTNIPK.L	HexNAc(5)Hex(5)Fuc(1)	N[+1972]	1175.19	3	3523.56	3523.57	0	-2.4	56	Specific	212.51	82.88	82.88	4.33	12	>sp|P16444|DPEP1_HUMAN Dipeptidase 1 OS=Homo sapiens OX=9606 GN=DPEP1 PE=1 SV=3	2717	20210911_zy_urine_ethcd_2.4522.4522.3	controllerType=0 controllerNumber=1 scan=4522	20.3787
12517:3	71	K.AFN[+2350.830]STLPTMAQMEK.A	HexNAc(4)Hex(5)Fuc(1)NeuAc(2)	N[+2351]	1307.2	3	3919.57	3919.58	0	-0.1	55	Specific	212.51	65.97	65.97	1.45	2	>sp|P16070|CD44_HUMAN CD44 antigen OS=Homo sapiens OX=9606 GN=CD44 PE=1 SV=3	1144	20210911_zy_urine_ethcd_2.13729.13729.3	controllerType=0 controllerNumber=1 scan=13729	61.5
06070:3	11	R.ITYSIVQTN[+2919.042]C[+57.021]SK.E	HexNAc(6)Hex(6)Fuc(1)NeuAc(2)	C[+57], N[+2919]	1444.58	3	4331.72	4332.75	-1	-4.8	197	Specific	212.76	47.5	47.5	2.75	27	>sp|P01042|KNG1_HUMAN Kininogen-1 OS=Homo sapiens OX=9606 GN=KNG1 PE=1 SV=2	6533	20210911_zy_urine_ethcd_2.6665.6665.3	controllerType=0 controllerNumber=1 scan=6665	29.9587
04602:2	109	R.N[+1702.581]VSTNVFFK.Q	HexNAc(2)Hex(8)	N[+1703]	1379.57	2	2758.13	2758.13	0	-1	337	Specific	213	127.67	127.67	1.71	11	>sp|Q6YHK3|CD109_HUMAN CD109 antigen OS=Homo sapiens OX=9606 GN=CD109 PE=1 SV=2	8627	20210911_zy_urine_ethcd_2.5058.5058.2	controllerType=0 controllerNumber=1 scan=5058	22.8073
05204:3	25	R.AN[+2627.947]LTTLAGTHTNIPK.L	HexNAc(6)Hex(6)Fuc(1)NeuAc(1)	N[+2628]	1393.93	3	4179.79	4179.8	0	-1.6	56	Specific	213.12	78.27	78.27	4.59	12	>sp|P16444|DPEP1_HUMAN Dipeptidase 1 OS=Homo sapiens OX=9606 GN=DPEP1 PE=1 SV=3	2717	20210911_zy_urine_ethcd_2.5718.5718.3	controllerType=0 controllerNumber=1 scan=5718	25.7643
11474:3	4	K.EN[+2059.735]LTAPGSDSAVFFEQGTTR.I	HexNAc(4)Hex(5)Fuc(1)NeuAc(1)	N[+2060]	1396.25	3	4186.72	4186.73	0	-2.6	396	Specific	213.13	90.8	90.8	4.75	27	>sp|P00450|CERU_HUMAN Ceruloplasmin OS=Homo sapiens OX=9606 GN=CP PE=1 SV=1	460	20210911_zy_urine_ethcd_2.12586.12586.3	controllerType=0 controllerNumber=1 scan=12586	56.3622
03222:3	59	K.N[+2350.830]ISIESR.E	HexNAc(4)Hex(5)Fuc(1)NeuAc(2)	N[+2351]	1057.09	3	3169.26	3169.27	0	-1.2	80	Specific	213.77	30.1	30.1	1.97	4	>sp|Q6UWI2|PARM1_HUMAN Prostate androgen-regulated mucin-like protein 1 OS=Homo sapiens OX=9606 GN=PARM1 PE=1 SV=1	13736	20210911_zy_urine_ethcd_2.3543.3543.3	controllerType=0 controllerNumber=1 scan=3543	15.9478
02913:3	44	K.TWSAFQN[+2116.756]GTDR.R	HexNAc(5)Hex(5)NeuAc(1)	N[+2117]	1133.79	3	3399.35	3399.34	0	4.3	1490	Specific	213.99	84.71	84.71	1.96	17	>sp|P98164|LRP2_HUMAN Low-density lipoprotein receptor-related protein 2 OS=Homo sapiens OX=9606 GN=LRP2 PE=1 SV=3	10997	20210911_zy_urine_ethcd_2.3203.3203.3	controllerType=0 controllerNumber=1 scan=3203	14.4208
14460:3	105	R.GAAN[+3517.228]DSTQFTVAGR.M	HexNAc(6)Hex(7)NeuAc(4)	N[+3517]	1637.63	3	4910.89	4911.89	-1	-0.3	1204	Specific	213.99	76.34	76.34	1.13	5	>sp|O95425|SVIL_HUMAN Supervillin OS=Homo sapiens OX=9606 GN=SVIL PE=1 SV=2	13681	20210911_zy_urine_ethcd_2.15854.15854.3	controllerType=0 controllerNumber=1 scan=15854	70.8891
04529:3	84	K.IPC[+57.021]SQPPQIEHGTIN[+2204.772]SSR.S	HexNAc(4)Hex(5)NeuAc(2)	C[+57], N[+2205]	1409.26	3	4225.75	4225.76	0	-1.4	868	Specific	214.26	70.59	70.59	3.02	1	>sp|P08603|CFAH_HUMAN Complement factor H OS=Homo sapiens OX=9606 GN=CFH PE=1 SV=4	385	20210911_zy_urine_ethcd_2.4977.4977.3	controllerType=0 controllerNumber=1 scan=4977	22.4411
12557:3	10	K.C[+57.021]GLVPVLAENYN[+2221.788]K.S	HexNAc(4)Hex(6)Fuc(1)NeuAc(1)	C[+57], N[+2222]	1233.52	3	3698.54	3698.54	0	0.5	421	Specific	214.28	152.59	152.59	2.45	19	>sp|P02787|TRFE_HUMAN Serotransferrin OS=Homo sapiens OX=9606 GN=TF PE=1 SV=3	18223	20210911_zy_urine_ethcd_2.13773.13773.3	controllerType=0 controllerNumber=1 scan=13773	61.6969
08989:3	5	K.DIVEYYNDSN[+1548.545]GSHVLQGR.F	HexNAc(3)Hex(4)NeuAc(1)	N[+1549]	1205.5	3	3614.48	3614.5	0	-4.8	103	Specific	214.89	62.39	45.34	4.62	36	>sp|P25311|ZA2G_HUMAN Zinc-alpha-2-glycoprotein OS=Homo sapiens OX=9606 GN=AZGP1 PE=1 SV=2	18783	20210911_zy_urine_ethcd_2.9862.9862.3	controllerType=0 controllerNumber=1 scan=9862	44.1766
04179:3	20	R.VYKPSAGN[+2861.000]NSLYR.D	HexNAc(5)Hex(6)NeuAc(3)	N[+2861]	1443.59	3	4328.76	4329.75	-1	2.6	155	Specific	215.08	82.09	82.09	2.45	11	>sp|P02749|APOH_HUMAN Beta-2-glycoprotein 1 OS=Homo sapiens OX=9606 GN=APOH PE=1 SV=3	19971	20210911_zy_urine_ethcd_2.4593.4593.3	controllerType=0 controllerNumber=1 scan=4593	20.7016
06457:3	35	K.AEFN[+2336.851]ITLIHPK.D	HexNAc(6)Hex(6)Fuc(1)	N[+2337]	1207.19	3	3619.55	3619.57	0	-4.1	231	Specific	215.09	67.7	67.7	2.41	9	>sp|P15144|AMPN_HUMAN Aminopeptidase N OS=Homo sapiens OX=9606 GN=ANPEP PE=1 SV=4	1209	20210911_zy_urine_ethcd_2.7089.7089.3	controllerType=0 controllerNumber=1 scan=7089	31.8524
12550:3	73	K.GWN[+2350.830]WTSGFNK.C	HexNAc(4)Hex(5)Fuc(1)NeuAc(2)	N[+2351]	1183.13	3	3547.38	3547.38	0	-0.2	159	Specific	215.26	75.12	75.12	1.07	5	>sp|P15328|FOLR1_HUMAN Folate receptor alpha OS=Homo sapiens OX=9606 GN=FOLR1 PE=1 SV=3	2914	20210911_zy_urine_ethcd_2.13765.13765.3	controllerType=0 controllerNumber=1 scan=13765	61.6654
04869:3	25	K.AN[+1809.666]LSQVADHLDHIK.E	HexNAc(5)Hex(4)Fuc(1)	N[+1810]	1124.16	3	3370.47	3370.48	0	-2.2	278	Specific	215.63	99.51	99.51	4.21	12	>sp|P16444|DPEP1_HUMAN Dipeptidase 1 OS=Homo sapiens OX=9606 GN=DPEP1 PE=1 SV=3	2717	20210911_zy_urine_ethcd_2.5350.5350.3	controllerType=0 controllerNumber=1 scan=5350	24.1119
02028:3	3	K.HYTN[+2278.809]SSQDVTVPC[+57.021]R.V	HexNAc(5)Hex(6)NeuAc(1)	C[+57], N[+2279]	1314.86	3	3942.56	3942.56	0	0	89	Specific	215.8	64.71	64.71	2.42	39	>sp|P01877|IGHA2_HUMAN Immunoglobulin heavy constant alpha 2 OS=Homo sapiens OX=9606 GN=IGHA2 PE=1 SV=4	10403	20210911_zy_urine_ethcd_2.2231.2231.3	controllerType=0 controllerNumber=1 scan=2231	10.2008
12743:4	6	R.QNQC[+57.021]FYN[+3147.115]SSYLNVQR.E	HexNAc(6)Hex(11)Fuc(1)	C[+57], N[+3147]	1268	4	5068.99	5067.98	1	2.1	87	Specific	216.01	79.6	79.6	4.06	28	>sp|P19652|A1AG2_HUMAN Alpha-1-acid glycoprotein 2 OS=Homo sapiens OX=9606 GN=ORM2 PE=1 SV=2	4531	20210911_zy_urine_ethcd_2.13976.13976.3	controllerType=0 controllerNumber=1 scan=13976	62.5909
11801:3	99	K.GSQWSDIEEFC[+57.021]N[+2204.772]R.S	HexNAc(4)Hex(5)NeuAc(2)	C[+57], N[+2205]	1278.15	3	3832.44	3832.45	0	-2.4	84	Specific	216.04	73.15	73.15	2.15	1	>sp|P08174|DAF_HUMAN Complement decay-accelerating factor OS=Homo sapiens OX=9606 GN=CD55 PE=1 SV=4	3955	20210911_zy_urine_ethcd_2.12945.12945.3	controllerType=0 controllerNumber=1 scan=12945	57.9934
14960:3	1	R.FALLM[+15.995]TNC[+57.021]YATPSSN[+3007.058]ATDPLK.Y	HexNAc(5)Hex(6)Fuc(1)NeuAc(3)	C[+57], M[+16], N[+3007]	1779.71	3	5337.13	5338.16	-1	-4.7	499	Specific	216.12	116.68	116.68	4.79	52	>sp|P07911|UROM_HUMAN Uromodulin OS=Homo sapiens OX=9606 GN=UMOD PE=1 SV=1	16609	20210911_zy_urine_ethcd_2.16401.16401.3	controllerType=0 controllerNumber=1 scan=16401	73.3066
08662:4	1	R.C[+57.021]NTAAPMWLN[+1954.704]GTHPSSDEGIVSR.K	HexNAc(5)Hex(4)NeuAc(1)	C[+57], N[+1955]	1114.71	4	4455.82	4454.84	1	-3.9	223	Specific	216.26	156.09	156.09	5.07	52	>sp|P07911|UROM_HUMAN Uromodulin OS=Homo sapiens OX=9606 GN=UMOD PE=1 SV=1	16609	20210911_zy_urine_ethcd_2.9504.9504.4	controllerType=0 controllerNumber=1 scan=9504	42.569
12600:3	2	R.QDQC[+57.021]IYN[+2878.015]TTYLNVQR.E	HexNAc(5)Hex(7)Fuc(1)NeuAc(2)	C[+57], N[+2878]	1598.65	3	4793.92	4793.91	0	2.1	87	Specific	216.44	110.72	110.72	3.14	59	>sp|P02763|A1AG1_HUMAN Alpha-1-acid glycoprotein 1 OS=Homo sapiens OX=9606 GN=ORM1 PE=1 SV=1	2208	20210911_zy_urine_ethcd_2.13820.13820.3	controllerType=0 controllerNumber=1 scan=13820	61.9112
02747:3	2	R.EN[+4028.418]GTISR.Y	HexNAc(7)Hex(8)Fuc(1)NeuAc(4)	N[+4028]	1601.94	3	4803.79	4804.81	-1	-2.5	102	Specific	216.6	17.68	17.68	1.46	59	>sp|P02763|A1AG1_HUMAN Alpha-1-acid glycoprotein 1 OS=Homo sapiens OX=9606 GN=ORM1 PE=1 SV=1	2208	20210911_zy_urine_ethcd_2.3021.3021.3	controllerType=0 controllerNumber=1 scan=3021	13.6148
11921:3	99	K.GSQWSDIEEFC[+57.021]N[+2204.772]R.S	HexNAc(4)Hex(5)NeuAc(2)	C[+57], N[+2205]	1278.16	3	3832.45	3832.45	0	-0.4	84	Specific	216.64	92.02	92.02	0.91	1	>sp|P08174|DAF_HUMAN Complement decay-accelerating factor OS=Homo sapiens OX=9606 GN=CD55 PE=1 SV=4	3955	20210911_zy_urine_ethcd_2.13077.13077.3	controllerType=0 controllerNumber=1 scan=13077	58.6069
04285:3	28	K.FLN[+2204.772]ESYK.H	HexNAc(4)Hex(5)NeuAc(2)	N[+2205]	1035.74	3	3105.21	3105.22	0	-2.2	92	Specific	216.88	18.52	18.52	1.44	11	>sp|P15309|PPAP_HUMAN Prostatic acid phosphatase OS=Homo sapiens OX=9606 GN=ACPP PE=1 SV=3	14195	20210911_zy_urine_ethcd_2.4710.4710.3	controllerType=0 controllerNumber=1 scan=4710	21.2289
01149:3	23	R.LTN[+2715.963]GSR.Y	HexNAc(5)Hex(6)Fuc(1)NeuAc(2)	N[+2716]	1121.77	3	3363.3	3363.31	0	-2.7	114	Specific	216.94	13.28	13.28	0.86	28	>sp|P07998|RNAS1_HUMAN Ribonuclease pancreatic OS=Homo sapiens OX=9606 GN=RNASE1 PE=1 SV=4	14690	20210911_zy_urine_ethcd_2.1269.1269.3	controllerType=0 controllerNumber=1 scan=1269	5.9576
06180:3	41	R.EN[+2350.830]ISDPTSPLR.T	HexNAc(4)Hex(5)Fuc(1)NeuAc(2)	N[+2351]	1193.82	3	3579.44	3579.45	0	-1.8	70	Specific	217.07	65.83	65.83	2.77	7	>sp|P01591|IGJ_HUMAN Immunoglobulin J chain OS=Homo sapiens OX=9606 GN=JCHAIN PE=1 SV=4	4401	20210911_zy_urine_ethcd_2.6786.6786.3	controllerType=0 controllerNumber=1 scan=6786	30.5063
10767:3	1	R.C[+57.021]NTAAPMWLN[+2204.772]GTHPSSDEGIVSR.K	HexNAc(4)Hex(5)NeuAc(2)	C[+57], N[+2205]	1568.97	3	4704.9	4704.91	0	-0.8	223	Specific	217.27	97.7	97.7	5.22	52	>sp|P07911|UROM_HUMAN Uromodulin OS=Homo sapiens OX=9606 GN=UMOD PE=1 SV=1	16609	20210911_zy_urine_ethcd_2.11810.11810.3	controllerType=0 controllerNumber=1 scan=11810	52.87
02152:3	9	K.TKPREEQFN[+2059.735]STFR.V	HexNAc(4)Hex(5)Fuc(1)NeuAc(1)	N[+2060]	1233.85	3	3699.54	3699.55	0	-3.7	168	Specific	217.57	100.1	100.1	2.4	31	>sp|P01859|IGHG2_HUMAN Immunoglobulin heavy constant gamma 2 OS=Homo sapiens OX=9606 GN=IGHG2 PE=1 SV=2	2858	20210911_zy_urine_ethcd_2.2368.2368.3	controllerType=0 controllerNumber=1 scan=2368	10.7642
01650:3	133	K.N[+3276.158]ISR.A	HexNAc(6)Hex(10)Fuc(1)NeuAc(1)	N[+3276]	1255.82	3	3765.43	3765.44	0	-1.1	2174	Specific	217.76	217.76	217.76	0.23	12	>sp|Q86UQ4|ABCAD_HUMAN ATP-binding cassette sub-family A member 13 OS=Homo sapiens OX=9606 GN=ABCA13 PE=2 SV=3	6957	20210911_zy_urine_ethcd_2.1819.1819.3	controllerType=0 controllerNumber=1 scan=1819	8.4371
03317:3	3	K.TPLTAN[+2262.814]ITK.S	HexNAc(5)Hex(5)Fuc(1)NeuAc(1)	N[+2263]	1074.46	3	3221.37	3221.37	0	-1.4	200	Specific	218.55	80.86	80.86	4.13	39	>sp|P01877|IGHA2_HUMAN Immunoglobulin heavy constant alpha 2 OS=Homo sapiens OX=9606 GN=IGHA2 PE=1 SV=4	10403	20210911_zy_urine_ethcd_2.3648.3648.3	controllerType=0 controllerNumber=1 scan=3648	16.4204
01040:2	2	R.EN[+1913.677]GTISR.Y	HexNAc(4)Hex(5)NeuAc(1)	N[+1914]	1345.53	2	2690.06	2690.07	0	-2.4	102	Specific	218.57	30.85	30.85	2.4	59	>sp|P02763|A1AG1_HUMAN Alpha-1-acid glycoprotein 1 OS=Homo sapiens OX=9606 GN=ORM1 PE=1 SV=1	2208	20210911_zy_urine_ethcd_2.1149.1149.2	controllerType=0 controllerNumber=1 scan=1149	5.3933
08703:3	11	R.ITYSIVQTN[+3210.137]C[+57.021]SK.E	HexNAc(6)Hex(6)Fuc(1)NeuAc(3)	C[+57], N[+3210]	1541.95	3	4623.83	4623.84	0	-2.3	197	Specific	218.86	65.62	65.62	4.02	27	>sp|P01042|KNG1_HUMAN Kininogen-1 OS=Homo sapiens OX=9606 GN=KNG1 PE=1 SV=2	6533	20210911_zy_urine_ethcd_2.9549.9549.3	controllerType=0 controllerNumber=1 scan=9549	42.7697
01125:2	52	K.MC[+57.021]LN[+1540.529]R.T	HexNAc(2)Hex(7)	C[+57], N[+1541]	1117.42	2	2233.84	2233.85	0	-2.1	339	Specific	219.05	51.76	51.76	2.34	9	>sp|Q13510|ASAH1_HUMAN Acid ceramidase OS=Homo sapiens OX=9606 GN=ASAH1 PE=1 SV=5	8676	20210911_zy_urine_ethcd_2.1243.1243.2	controllerType=0 controllerNumber=1 scan=1243	5.8321
04315:4	19	K.NLFLN[+1710.598]HSEN[+2407.852]ATAK.D	HexNAc(3)Hex(5)NeuAc(1),HexNAc(5)Hex(5)NeuAc(2)	N[+1711][+2408]	1394.8	4	5576.17	5577.18	-1	-1.7	203	Specific	219.22	89.62	15.09	4.22	19	>sp|P00738|HPT_HUMAN Haptoglobin OS=Homo sapiens OX=9606 GN=HP PE=1 SV=1	3044	20210911_zy_urine_ethcd_2.4743.4743.4	controllerType=0 controllerNumber=1 scan=4743	21.3774
03212:2	3	K.TPLTAN[+2262.814]ITK.S	HexNAc(5)Hex(5)Fuc(1)NeuAc(1)	N[+2263]	1611.19	2	3221.37	3221.37	0	-1.4	200	Specific	219.23	12.86	12.86	1.5	39	>sp|P01877|IGHA2_HUMAN Immunoglobulin heavy constant alpha 2 OS=Homo sapiens OX=9606 GN=IGHA2 PE=1 SV=4	10403	20210911_zy_urine_ethcd_2.3532.3532.2	controllerType=0 controllerNumber=1 scan=3532	15.8974
05918:3	63	R.MDGSLNFN[+2204.772]R.T	HexNAc(4)Hex(5)NeuAc(2)	N[+2205]	1086.75	3	3258.23	3258.25	0	-5.9	679	Specific	219.23	57.34	57.34	1.74	3	>sp|P02671|FIBA_HUMAN Fibrinogen alpha chain OS=Homo sapiens OX=9606 GN=FGA PE=1 SV=2	9171	20210911_zy_urine_ethcd_2.6499.6499.3	controllerType=0 controllerNumber=1 scan=6499	29.2214
02936:3	18	K.AAIPSALDTN[+1825.661]SSK.S	HexNAc(5)Hex(5)	N[+1826]	1034.11	3	3100.31	3100.32	0	-3.7	542	Specific	219.28	93.4	93.4	3.97	17	>sp|Q08380|LG3BP_HUMAN Galectin-3-binding protein OS=Homo sapiens OX=9606 GN=LGALS3BP PE=1 SV=1	4876	20210911_zy_urine_ethcd_2.3228.3228.3	controllerType=0 controllerNumber=1 scan=3228	14.531
07657:3	20	K.LGN[+2204.772]WSAMPSC[+57.021]K.A	HexNAc(4)Hex(5)NeuAc(2)	C[+57], N[+2205]	1152.45	3	3455.34	3455.34	0	-0.3	251	Specific	219.38	75.19	75.19	2.4	11	>sp|P02749|APOH_HUMAN Beta-2-glycoprotein 1 OS=Homo sapiens OX=9606 GN=APOH PE=1 SV=3	19971	20210911_zy_urine_ethcd_2.8405.8405.3	controllerType=0 controllerNumber=1 scan=8405	37.7041
03190:2	5	R.FGC[+57.021]EIENN[+1548.545]R.S	HexNAc(3)Hex(4)NeuAc(1)	C[+57], N[+1549]	1344.02	2	2687.03	2687.04	0	-3.4	121	Specific	219.4	105.72	105.72	4.08	36	>sp|P25311|ZA2G_HUMAN Zinc-alpha-2-glycoprotein OS=Homo sapiens OX=9606 GN=AZGP1 PE=1 SV=2	18783	20210911_zy_urine_ethcd_2.3507.3507.2	controllerType=0 controllerNumber=1 scan=3507	15.7944
12703:3	2	R.QDQC[+57.021]IYN[+2715.963]TTYLNVQR.E	HexNAc(5)Hex(6)Fuc(1)NeuAc(2)	C[+57], N[+2716]	1544.62	3	4631.85	4631.86	0	-2.1	87	Specific	219.43	106.86	106.86	4.76	59	>sp|P02763|A1AG1_HUMAN Alpha-1-acid glycoprotein 1 OS=Homo sapiens OX=9606 GN=ORM1 PE=1 SV=1	2208	20210911_zy_urine_ethcd_2.13932.13932.3	controllerType=0 controllerNumber=1 scan=13932	62.3975
09170:4	1	R.C[+57.021]NTAAPM[+15.995]WLN[+2245.799]GTHPSSDEGIVSR.K	HexNAc(5)Hex(4)NeuAc(2)	C[+57], M[+16], N[+2246]	1191.49	4	4762.92	4761.93	1	-1.8	223	Specific	219.6	164.26	125.95	5.52	52	>sp|P07911|UROM_HUMAN Uromodulin OS=Homo sapiens OX=9606 GN=UMOD PE=1 SV=1	16609	20210911_zy_urine_ethcd_2.10061.10061.4	controllerType=0 controllerNumber=1 scan=10061	45.064
04435:3	5	R.FGC[+57.021]EIENN[+2861.000]R.S	HexNAc(5)Hex(6)NeuAc(3)	C[+57], N[+2861]	1333.83	3	3999.49	3999.49	0	-1.9	121	Specific	219.68	64.63	64.63	4.33	36	>sp|P25311|ZA2G_HUMAN Zinc-alpha-2-glycoprotein OS=Homo sapiens OX=9606 GN=AZGP1 PE=1 SV=2	18783	20210911_zy_urine_ethcd_2.4874.4874.3	controllerType=0 controllerNumber=1 scan=4874	21.9733
02116:3	2	R.EN[+3517.228]GTISR.Y	HexNAc(6)Hex(7)NeuAc(4)	N[+3517]	1432.22	3	4294.63	4293.62	1	2.9	102	Specific	219.73	17.96	17.96	0.55	59	>sp|P02763|A1AG1_HUMAN Alpha-1-acid glycoprotein 1 OS=Homo sapiens OX=9606 GN=ORM1 PE=1 SV=1	2208	20210911_zy_urine_ethcd_2.2327.2327.3	controllerType=0 controllerNumber=1 scan=2327	10.6065
01878:2	2	R.NEEYN[+2204.772]K.S	HexNAc(4)Hex(5)NeuAc(2)	N[+2205]	1501.07	2	3001.13	3001.12	0	4	52	Specific	219.87	56.72	56.72	1.31	59	>sp|P02763|A1AG1_HUMAN Alpha-1-acid glycoprotein 1 OS=Homo sapiens OX=9606 GN=ORM1 PE=1 SV=1	2208	20210911_zy_urine_ethcd_2.2068.2068.2	controllerType=0 controllerNumber=1 scan=2068	9.5067
03476:2	124	R.N[+2204.772]ETFK.A	HexNAc(4)Hex(5)NeuAc(2)	N[+2205]	1422.04	2	2843.08	2843.09	0	-1.9	424	Specific	220.07	21.41	21.41	1.64	1	>sp|Q7Z6J4|FGD2_HUMAN FYVE, RhoGEF and PH domain-containing protein 2 OS=Homo sapiens OX=9606 GN=FGD2 PE=1 SV=1	11855	20210911_zy_urine_ethcd_2.3822.3822.2	controllerType=0 controllerNumber=1 scan=3822	17.1967
13197:3	17	R.LAGKPTHVN[+2350.830]VSVVMAEVDGTC[+57.021].Y	HexNAc(4)Hex(5)Fuc(1)NeuAc(2)	C[+57], N[+2351]	1512.3	3	4534.9	4534.91	0	-2.2	332	CRagged	220.17	124.76	124.76	7.33	11	>sp|P01876|IGHA1_HUMAN Immunoglobulin heavy constant alpha 1 OS=Homo sapiens OX=9606 GN=IGHA1 PE=1 SV=2	9091	20210911_zy_urine_ethcd_2.14473.14473.3	controllerType=0 controllerNumber=1 scan=14473	64.7852
01765:2	56	R.VFLN[+1540.529]GSR.Q	HexNAc(2)Hex(7)	N[+1541]	1166.98	2	2332.96	2332.96	0	-2.4	101	Specific	220.32	91.67	91.67	5.5	4	>sp|P01133|EGF_HUMAN Pro-epidermal growth factor OS=Homo sapiens OX=9606 GN=EGF PE=1 SV=2	2598	20210911_zy_urine_ethcd_2.1945.1945.2	controllerType=0 controllerNumber=1 scan=1945	8.9903
05930:3	83	R.IN[+2262.814]NSLSELR.R	HexNAc(5)Hex(5)Fuc(1)NeuAc(1)	N[+2263]	1103.46	3	3308.36	3308.38	0	-5.3	65	Specific	220.39	27.55	27.55	2.94	10	>sp|Q9Y5J3|HEY1_HUMAN Hairy/enhancer-of-split related with YRPW motif protein 1 OS=Homo sapiens OX=9606 GN=HEY1 PE=1 SV=1	12003	20210911_zy_urine_ethcd_2.6512.6512.3	controllerType=0 controllerNumber=1 scan=6512	29.2794
12940:3	2	R.QDQC[+57.021]IYN[+3007.058]TTYLNVQR.E	HexNAc(5)Hex(6)Fuc(1)NeuAc(3)	C[+57], N[+3007]	1641.65	3	4922.95	4922.95	0	-1.9	87	Specific	220.87	106.51	106.51	6.47	59	>sp|P02763|A1AG1_HUMAN Alpha-1-acid glycoprotein 1 OS=Homo sapiens OX=9606 GN=ORM1 PE=1 SV=1	2208	20210911_zy_urine_ethcd_2.14192.14192.3	controllerType=0 controllerNumber=1 scan=14192	63.5422
03733:3	31	R.SLHVPGLN[+2424.867]K.T	HexNAc(5)Hex(6)Fuc(1)NeuAc(1)	N[+2425]	1130.48	3	3389.41	3389.42	0	-2.9	191	Specific	220.88	83.38	83.38	5.8	5	>sp|P30530|UFO_HUMAN Tyrosine-protein kinase receptor UFO OS=Homo sapiens OX=9606 GN=AXL PE=1 SV=4	18964	20210911_zy_urine_ethcd_2.4104.4104.3	controllerType=0 controllerNumber=1 scan=4104	18.4833
01420:3	27	R.EGN[+1971.719]ATGHLVGR.Y	HexNAc(5)Hex(5)Fuc(1)	N[+1972]	1028.1	3	3082.28	3082.28	0	-2	1800	Specific	220.97	81.46	81.46	5.15	16	>sp|O60494|CUBN_HUMAN Cubilin OS=Homo sapiens OX=9606 GN=CUBN PE=1 SV=5	6499	20210911_zy_urine_ethcd_2.1567.1567.3	controllerType=0 controllerNumber=1 scan=1567	7.3371
03267:3	102	R.DTFVN[+2391.857]ASR.T	HexNAc(5)Hex(4)Fuc(1)NeuAc(2)	N[+2392]	1101.1	3	3301.29	3301.3	0	-2	234	Specific	221.11	69.49	69.49	2.59	3	>sp|P05155|IC1_HUMAN Plasma protease C1 inhibitor OS=Homo sapiens OX=9606 GN=SERPING1 PE=1 SV=2	9291	20210911_zy_urine_ethcd_2.3593.3593.3	controllerType=0 controllerNumber=1 scan=3593	16.1686
06422:3	3	R.MAGKPTHIN[+2059.735]VSVVM[+15.995]AEADGTC[+57.021].Y	HexNAc(4)Hex(5)Fuc(1)NeuAc(1)	C[+57], M[+16], N[+2060]	1421.92	3	4263.74	4263.75	0	-2.8	319	CRagged	221.26	78.27	78.27	7.25	39	>sp|P01877|IGHA2_HUMAN Immunoglobulin heavy constant alpha 2 OS=Homo sapiens OX=9606 GN=IGHA2 PE=1 SV=4	10403	20210911_zy_urine_ethcd_2.7051.7051.3	controllerType=0 controllerNumber=1 scan=7051	31.6847
03351:3	21	K.EDALN[+3007.058]ETR.E	HexNAc(5)Hex(6)Fuc(1)NeuAc(3)	N[+3007]	1318.84	3	3954.5	3954.5	0	0.7	82	Specific	222.16	64.3	64.3	3.05	13	>sp|P10909|CLUS_HUMAN Clusterin OS=Homo sapiens OX=9606 GN=CLU PE=1 SV=1	6125	20210911_zy_urine_ethcd_2.3685.3685.3	controllerType=0 controllerNumber=1 scan=3685	16.5834
12565:3	2	R.QDQC[+57.021]IYN[+2569.905]TTYLNVQR.E	HexNAc(5)Hex(6)NeuAc(2)	C[+57], N[+2570]	1496.28	3	4486.83	4485.8	1	4.8	87	Specific	222.42	101.88	101.88	5.23	59	>sp|P02763|A1AG1_HUMAN Alpha-1-acid glycoprotein 1 OS=Homo sapiens OX=9606 GN=ORM1 PE=1 SV=1	2208	20210911_zy_urine_ethcd_2.13781.13781.3	controllerType=0 controllerNumber=1 scan=13781	61.7344
08155:3	8	R.C[+57.021]IQAN[+2569.905]YSLMENGK.I	HexNAc(5)Hex(6)NeuAc(2)	C[+57], N[+2570]	1366.86	3	4098.58	4097.6	1	-6	61	Specific	222.59	67.77	56.7	5.59	20	>sp|P05090|APOD_HUMAN Apolipoprotein D OS=Homo sapiens OX=9606 GN=APOD PE=1 SV=1	120	20210911_zy_urine_ethcd_2.8950.8950.3	controllerType=0 controllerNumber=1 scan=8950	40.1275
02136:3	44	K.TWSAFQN[+1971.719]GTDRR.V	HexNAc(5)Hex(5)Fuc(1)	N[+1972]	1137.47	3	3410.39	3410.4	0	-3.2	1490	Specific	222.75	100.98	100.98	4.61	17	>sp|P98164|LRP2_HUMAN Low-density lipoprotein receptor-related protein 2 OS=Homo sapiens OX=9606 GN=LRP2 PE=1 SV=3	10997	20210911_zy_urine_ethcd_2.2350.2350.3	controllerType=0 controllerNumber=1 scan=2350	10.6957
14256:3	1	R.FALLMTNC[+57.021]YATPSSN[+2059.735]ATDPLK.Y	HexNAc(4)Hex(5)Fuc(1)NeuAc(1)	C[+57], N[+2060]	1458.94	3	4374.82	4374.84	0	-5.4	499	Specific	223.46	137.99	137.99	6.4	52	>sp|P07911|UROM_HUMAN Uromodulin OS=Homo sapiens OX=9606 GN=UMOD PE=1 SV=1	16609	20210911_zy_urine_ethcd_2.15630.15630.3	controllerType=0 controllerNumber=1 scan=15630	69.8964
02397:2	3	K.TPLTAN[+1444.534]ITK.S	HexNAc(4)Hex(3)Fuc(1)	N[+1445]	1202.05	2	2403.08	2403.09	0	-2.6	200	Specific	223.53	69.59	69.59	5.82	39	>sp|P01877|IGHA2_HUMAN Immunoglobulin heavy constant alpha 2 OS=Homo sapiens OX=9606 GN=IGHA2 PE=1 SV=4	10403	20210911_zy_urine_ethcd_2.2635.2635.2	controllerType=0 controllerNumber=1 scan=2635	11.9292
02365:3	46	R.N[+2262.814]C[+57.021]TITANAEC[+57.021]AC[+57.021]R.N	HexNAc(5)Hex(5)Fuc(1)NeuAc(1)	C[+57]*3, N[+2263]	1268.48	3	3803.43	3803.44	0	-3.3	95	Specific	223.66	90.88	90.88	5.56	3	>sp|P26842|CD27_HUMAN CD27 antigen OS=Homo sapiens OX=9606 GN=CD27 PE=1 SV=2	5247	20210911_zy_urine_ethcd_2.2600.2600.3	controllerType=0 controllerNumber=1 scan=2600	11.7746
05867:3	83	R.IN[+2627.947]NSLSELR.R	HexNAc(6)Hex(6)Fuc(1)NeuAc(1)	N[+2628]	1225.17	3	3673.49	3673.51	0	-4.6	65	Specific	223.67	11.53	11.53	1.08	10	>sp|Q9Y5J3|HEY1_HUMAN Hairy/enhancer-of-split related with YRPW motif protein 1 OS=Homo sapiens OX=9606 GN=HEY1 PE=1 SV=1	12003	20210911_zy_urine_ethcd_2.6443.6443.3	controllerType=0 controllerNumber=1 scan=6443	28.9682
01233:3	23	R.LTN[+2715.963]GSR.Y	HexNAc(5)Hex(6)Fuc(1)NeuAc(2)	N[+2716]	1121.77	3	3363.3	3363.31	0	-2.5	114	Specific	223.8	12.19	12.19	1.98	28	>sp|P07998|RNAS1_HUMAN Ribonuclease pancreatic OS=Homo sapiens OX=9606 GN=RNASE1 PE=1 SV=4	14690	20210911_zy_urine_ethcd_2.1361.1361.3	controllerType=0 controllerNumber=1 scan=1361	6.3827
03207:3	3	K.TPLTAN[+2424.867]ITK.S	HexNAc(5)Hex(6)Fuc(1)NeuAc(1)	N[+2425]	1128.48	3	3383.43	3383.42	0	0.8	200	Specific	223.87	85.67	85.67	4.77	39	>sp|P01877|IGHA2_HUMAN Immunoglobulin heavy constant alpha 2 OS=Homo sapiens OX=9606 GN=IGHA2 PE=1 SV=4	10403	20210911_zy_urine_ethcd_2.3526.3526.3	controllerType=0 controllerNumber=1 scan=3526	15.8775
13199:3	10	R.QQQHLFGSN[+2059.735]VTDC[+57.021]SGNFC[+57.021]LFR.S	HexNAc(4)Hex(5)Fuc(1)NeuAc(1)	C[+57]*2, N[+2060]	1525.29	3	4573.85	4574.86	-1	-1.6	622	Specific	224.31	143.24	143.24	6.66	19	>sp|P02787|TRFE_HUMAN Serotransferrin OS=Homo sapiens OX=9606 GN=TF PE=1 SV=3	18223	20210911_zy_urine_ethcd_2.14475.14475.3	controllerType=0 controllerNumber=1 scan=14475	64.7947
10546:3	12	K.N[+2204.772]FTENDLLVR.I	HexNAc(4)Hex(5)NeuAc(2)	N[+2205]	1142.47	3	3425.39	3425.4	0	-2.9	416	Specific	224.73	86.12	86.12	5.06	19	>sp|P00734|THRB_HUMAN Prothrombin OS=Homo sapiens OX=9606 GN=F2 PE=1 SV=2	18404	20210911_zy_urine_ethcd_2.11568.11568.3	controllerType=0 controllerNumber=1 scan=11568	51.7924
01626:3	12	R.GHVN[+2350.830]ITR.S	HexNAc(4)Hex(5)Fuc(1)NeuAc(2)	N[+2351]	1049.76	3	3147.26	3147.27	0	-2.9	118	Specific	224.92	74.34	74.34	5.29	19	>sp|P00734|THRB_HUMAN Prothrombin OS=Homo sapiens OX=9606 GN=F2 PE=1 SV=2	18404	20210911_zy_urine_ethcd_2.1793.1793.3	controllerType=0 controllerNumber=1 scan=1793	8.328
05187:3	25	R.AN[+2627.947]LTTLAGTHTNIPK.L	HexNAc(6)Hex(6)Fuc(1)NeuAc(1)	N[+2628]	1393.93	3	4179.79	4179.8	0	-2.3	56	Specific	225.01	28.69	28.69	5.57	12	>sp|P16444|DPEP1_HUMAN Dipeptidase 1 OS=Homo sapiens OX=9606 GN=DPEP1 PE=1 SV=3	2717	20210911_zy_urine_ethcd_2.5699.5699.3	controllerType=0 controllerNumber=1 scan=5699	25.6799
02351:3	6	R.EN[+3663.286]GTVSR.Y	HexNAc(6)Hex(7)Fuc(1)NeuAc(4)	N[+3663]	1475.89	3	4425.66	4425.66	0	0.6	102	Specific	225.18	65.46	65.46	4.53	28	>sp|P19652|A1AG2_HUMAN Alpha-1-acid glycoprotein 2 OS=Homo sapiens OX=9606 GN=ORM2 PE=1 SV=2	4531	20210911_zy_urine_ethcd_2.2585.2585.3	controllerType=0 controllerNumber=1 scan=2585	11.7051
02888:3	31	R.SLHVPGLN[+1768.640]K.T	HexNAc(4)Hex(5)Fuc(1)	N[+1769]	911.735	3	2733.19	2733.2	0	-2.3	191	Specific	225.29	80.32	80.32	6.03	5	>sp|P30530|UFO_HUMAN Tyrosine-protein kinase receptor UFO OS=Homo sapiens OX=9606 GN=AXL PE=1 SV=4	18964	20210911_zy_urine_ethcd_2.3175.3175.3	controllerType=0 controllerNumber=1 scan=3175	14.2956
08894:3	5	K.DIVEYYN[+1913.677]DSNGSHVLQGR.F	HexNAc(4)Hex(5)NeuAc(1)	N[+1914]	1327.21	3	3979.61	3979.63	0	-4.9	103	Specific	225.3	91.96	32.85	6.3	36	>sp|P25311|ZA2G_HUMAN Zinc-alpha-2-glycoprotein OS=Homo sapiens OX=9606 GN=AZGP1 PE=1 SV=2	18783	20210911_zy_urine_ethcd_2.9758.9758.3	controllerType=0 controllerNumber=1 scan=9758	43.711
05560:3	34	K.NYHQPAILN[+2262.814]SSALR.Q	HexNAc(5)Hex(5)Fuc(1)NeuAc(1)	N[+2263]	1282.89	3	3846.64	3846.64	0	0	41	Specific	226.26	88.4	88.4	4.99	5	>sp|Q16769|QPCT_HUMAN Glutaminyl-peptide cyclotransferase OS=Homo sapiens OX=9606 GN=QPCT PE=1 SV=1	12985	20210911_zy_urine_ethcd_2.6107.6107.3	controllerType=0 controllerNumber=1 scan=6107	27.4875
08238:4	2	R.QDQC[+57.021]IYN[+2643.941]TTYLNVQR.E	HexNAc(6)Hex(7)NeuAc(1)	C[+57], N[+2644]	1140.71	4	4559.84	4559.84	0	-0.5	87	Specific	226.42	127.95	127.95	6.15	59	>sp|P02763|A1AG1_HUMAN Alpha-1-acid glycoprotein 1 OS=Homo sapiens OX=9606 GN=ORM1 PE=1 SV=1	2208	20210911_zy_urine_ethcd_2.9040.9040.6	controllerType=0 controllerNumber=1 scan=9040	40.5261
10253:3	93	K.WTEDN[+1038.375]ITSSVLFN[+892.317]R.S	HexNAc(2)Hex(3)Fuc(1),HexNAc(2)Hex(3)	N[+892][+1038]	1204.84	3	3612.5	3612.51	0	-1.6	585	Specific	226.42	110.52	5.04	3.21	3	>sp|Q07075|AMPE_HUMAN Glutamyl aminopeptidase OS=Homo sapiens OX=9606 GN=ENPEP PE=1 SV=3	8362	20210911_zy_urine_ethcd_2.11247.11247.3	controllerType=0 controllerNumber=1 scan=11247	50.3669
02691:2	9	R.EEQFN[+1971.719]STFR.V	HexNAc(5)Hex(5)Fuc(1)	N[+1972]	1565.12	2	3129.24	3129.24	0	-1	172	Specific	226.46	65.39	65.39	5.57	31	>sp|P01859|IGHG2_HUMAN Immunoglobulin heavy constant gamma 2 OS=Homo sapiens OX=9606 GN=IGHG2 PE=1 SV=2	2858	20210911_zy_urine_ethcd_2.2959.2959.2	controllerType=0 controllerNumber=1 scan=2959	13.3518
14522:3	6	R.QNQC[+57.021]FYN[+2861.000]SSYLNVQR.E	HexNAc(5)Hex(6)NeuAc(3)	C[+57], N[+2861]	1594.63	3	4781.86	4781.87	0	-0.8	87	Specific	226.5	98.87	98.87	5.94	28	>sp|P19652|A1AG2_HUMAN Alpha-1-acid glycoprotein 2 OS=Homo sapiens OX=9606 GN=ORM2 PE=1 SV=2	4531	20210911_zy_urine_ethcd_2.15922.15922.3	controllerType=0 controllerNumber=1 scan=15922	71.1877
02433:3	9	R.EEQFN[+1606.587]STFR.V	HexNAc(4)Hex(4)Fuc(1)	N[+1607]	922.038	3	2764.1	2764.11	0	-3	172	Specific	226.79	108.05	108.05	5.79	31	>sp|P01859|IGHG2_HUMAN Immunoglobulin heavy constant gamma 2 OS=Homo sapiens OX=9606 GN=IGHG2 PE=1 SV=2	2858	20210911_zy_urine_ethcd_2.2675.2675.3	controllerType=0 controllerNumber=1 scan=2675	12.1096
01450:3	23	R.N[+2715.963]MTQGR.C	HexNAc(5)Hex(6)Fuc(1)NeuAc(2)	N[+2716]	1141.43	3	3422.28	3422.29	0	-3	62	Specific	227.41	54.75	54.75	4.2	28	>sp|P07998|RNAS1_HUMAN Ribonuclease pancreatic OS=Homo sapiens OX=9606 GN=RNASE1 PE=1 SV=4	14690	20210911_zy_urine_ethcd_2.1600.1600.3	controllerType=0 controllerNumber=1 scan=1600	7.4856
07304:4	19	K.NLFLN[+2350.830]HSEN[+2861.000]ATAK.D	HexNAc(4)Hex(5)Fuc(1)NeuAc(2),HexNAc(5)Hex(6)NeuAc(3)	N[+2351][+2861]	1668.14	4	6669.55	6670.56	-1	-1.1	203	Specific	227.46	111.38	3.51	5.64	19	>sp|P00738|HPT_HUMAN Haptoglobin OS=Homo sapiens OX=9606 GN=HP PE=1 SV=1	3044	20210911_zy_urine_ethcd_2.8018.8018.4	controllerType=0 controllerNumber=1 scan=8018	35.976
07473:3	11	K.LNAENN[+2245.799]ATFYFK.I	HexNAc(5)Hex(4)NeuAc(2)	N[+2246]	1226.51	3	3677.5	3677.49	0	3.1	289	Specific	227.64	91.31	91.31	4.42	27	>sp|P01042|KNG1_HUMAN Kininogen-1 OS=Homo sapiens OX=9606 GN=KNG1 PE=1 SV=2	6533	20210911_zy_urine_ethcd_2.8203.8203.3	controllerType=0 controllerNumber=1 scan=8203	36.7965
01944:2	13	R.EEQFN[+1241.454]STYR.V	HexNAc(3)Hex(3)Fuc(1)	N[+1241]	1207.99	2	2414.97	2414.97	0	-2.5	173	Specific	227.67	88.31	88.31	5.21	17	>sp|P01861|IGHG4_HUMAN Immunoglobulin heavy constant gamma 4 OS=Homo sapiens OX=9606 GN=IGHG4 PE=1 SV=1	12793	20210911_zy_urine_ethcd_2.2140.2140.2	controllerType=0 controllerNumber=1 scan=2140	9.8119
05429:3	80	R.KMN[+2350.830]SSGC[+57.021]LSEEVGSLR.P	HexNAc(4)Hex(5)Fuc(1)NeuAc(2)	C[+57], N[+2351]	1369.23	3	4105.67	4104.65	1	4.3	28	Specific	228.02	25.47	25.47	2.77	4	>sp|O75388|GPR32_HUMAN Probable G-protein coupled receptor 32 OS=Homo sapiens OX=9606 GN=GPR32 PE=2 SV=1	4827	20210911_zy_urine_ethcd_2.5964.5964.3	controllerType=0 controllerNumber=1 scan=5964	26.8598
02197:3	9	K.PREEQFN[+1444.534]STFR.V	HexNAc(4)Hex(3)Fuc(1)	N[+1445]	952.406	3	2855.2	2855.21	0	-1.9	170	Specific	228.42	171.81	171.81	4.36	31	>sp|P01859|IGHG2_HUMAN Immunoglobulin heavy constant gamma 2 OS=Homo sapiens OX=9606 GN=IGHG2 PE=1 SV=2	2858	20210911_zy_urine_ethcd_2.2417.2417.3	controllerType=0 controllerNumber=1 scan=2417	10.9674
12622:4	2	R.QDQC[+57.021]IYN[+3007.058]TTYLNVQR.E	HexNAc(5)Hex(6)Fuc(1)NeuAc(3)	C[+57], N[+3007]	1231.49	4	4922.94	4922.95	0	-2	87	Specific	228.5	114.37	114.37	6.87	59	>sp|P02763|A1AG1_HUMAN Alpha-1-acid glycoprotein 1 OS=Homo sapiens OX=9606 GN=ORM1 PE=1 SV=1	2208	20210911_zy_urine_ethcd_2.13844.13844.3	controllerType=0 controllerNumber=1 scan=13844	62.0149
10032:3	6	R.QNQC[+57.021]FYN[+2935.037]SSYLNVQR.E	HexNAc(6)Hex(7)NeuAc(2)	C[+57], N[+2935]	1619.3	3	4855.9	4855.9	0	-0.8	87	Specific	228.63	138.99	138.99	6	28	>sp|P19652|A1AG2_HUMAN Alpha-1-acid glycoprotein 2 OS=Homo sapiens OX=9606 GN=ORM2 PE=1 SV=2	4531	20210911_zy_urine_ethcd_2.11005.11005.3	controllerType=0 controllerNumber=1 scan=11005	49.2833
05253:3	43	R.ISM[+15.995]C[+57.021]QNLGYN[+2350.830]VTK.M	HexNAc(4)Hex(5)Fuc(1)NeuAc(2)	C[+57], M[+16], N[+2351]	1298.85	3	3894.53	3894.55	0	-5.6	50	Specific	229.53	91.46	91.46	5.57	5	>sp|Q9ULV1|FZD4_HUMAN Frizzled-4 OS=Homo sapiens OX=9606 GN=FZD4 PE=1 SV=2	20281	20210911_zy_urine_ethcd_2.5771.5771.3	controllerType=0 controllerNumber=1 scan=5771	26.0023
01416:3	2	R.NEEYN[+2350.830]K.S	HexNAc(4)Hex(5)Fuc(1)NeuAc(2)	N[+2351]	1049.73	3	3147.17	3147.18	0	-2.2	52	Specific	229.56	65.32	65.32	4.68	59	>sp|P02763|A1AG1_HUMAN Alpha-1-acid glycoprotein 1 OS=Homo sapiens OX=9606 GN=ORM1 PE=1 SV=1	2208	20210911_zy_urine_ethcd_2.1563.1563.3	controllerType=0 controllerNumber=1 scan=1563	7.3215
04551:3	3	K.TPLTAN[+2204.772]ITK.S	HexNAc(4)Hex(5)NeuAc(2)	N[+2205]	1055.11	3	3163.33	3163.33	0	-0.2	200	Specific	229.68	93.1	93.1	5.25	39	>sp|P01877|IGHA2_HUMAN Immunoglobulin heavy constant alpha 2 OS=Homo sapiens OX=9606 GN=IGHA2 PE=1 SV=4	10403	20210911_zy_urine_ethcd_2.5002.5002.3	controllerType=0 controllerNumber=1 scan=5002	22.5512
01708:3	6	R.EN[+3517.228]GTVSR.Y	HexNAc(6)Hex(7)NeuAc(4)	N[+3517]	1427.21	3	4279.62	4279.6	0	5	102	Specific	229.76	43.03	43.03	3.94	28	>sp|P19652|A1AG2_HUMAN Alpha-1-acid glycoprotein 2 OS=Homo sapiens OX=9606 GN=ORM2 PE=1 SV=2	4531	20210911_zy_urine_ethcd_2.1882.1882.3	controllerType=0 controllerNumber=1 scan=1882	8.7146
02662:3	9	R.EEQFN[+1768.640]STFR.V	HexNAc(4)Hex(5)Fuc(1)	N[+1769]	976.057	3	2926.16	2926.16	0	-2.3	172	Specific	229.79	74.63	74.63	6.02	31	>sp|P01859|IGHG2_HUMAN Immunoglobulin heavy constant gamma 2 OS=Homo sapiens OX=9606 GN=IGHG2 PE=1 SV=2	2858	20210911_zy_urine_ethcd_2.2927.2927.3	controllerType=0 controllerNumber=1 scan=2927	13.2239
02330:3	59	K.N[+2059.735]ISIESR.E	HexNAc(4)Hex(5)Fuc(1)NeuAc(1)	N[+2060]	960.06	3	2878.16	2878.17	0	-2.3	80	Specific	229.99	40.79	40.79	5.18	4	>sp|Q6UWI2|PARM1_HUMAN Prostate androgen-regulated mucin-like protein 1 OS=Homo sapiens OX=9606 GN=PARM1 PE=1 SV=1	13736	20210911_zy_urine_ethcd_2.2562.2562.3	controllerType=0 controllerNumber=1 scan=2562	11.6006
03569:3	9	R.EEQFN[+1913.677]STFR.V	HexNAc(4)Hex(5)NeuAc(1)	N[+1914]	1024.4	3	3071.19	3071.2	0	-2	172	Specific	230.15	70.14	70.14	6.02	31	>sp|P01859|IGHG2_HUMAN Immunoglobulin heavy constant gamma 2 OS=Homo sapiens OX=9606 GN=IGHG2 PE=1 SV=2	2858	20210911_zy_urine_ethcd_2.3924.3924.3	controllerType=0 controllerNumber=1 scan=3924	17.6596
[truncated: 793 more rows]

## Sheet: EThcD-R3
Query #:z	Protein Rank	Peptide < ProteinMetrics Confidential >	Glycans NHFAGNa	Modification Type(s)	Observed m/z	z	Observed (M+H)	Calc. mass (M+H)	Off-by-x error	Mass error (ppm)	Starting position	Cleavage	Score	Delta	Delta Mod	|Log Prob|	# of unique peptides	Protein Name	Protein DB number	Comment	Scan #	Scan Time
[truncated: 937 more rows]

[truncated: 12 more sheets: sceHCD-R1, sceHCD-R2, sceHCD-R3, EThcD-sceHCD-R1, EThcD-sceHCD-R2, EThcD-sceHCD-R3, HCD-pd-ETD-R1, HCD-pd-ETD-R2, HCD-pd-ETD-R3, sceHCD-pd-ETD-R1, sceHCD-pd-ETD-R2, sceHCD-pd-ETD-R3]
