# Supplementary material for: Comparative N-Glycoproteomics Analysis of Clinical Samples Via Different Mass Spectrometry Dissociation Methods
Source: Front Chem. 2022 Feb 24;10:839470. doi: 10.3389/fchem.2022.839470 (PMC8907888; doi:10.3389/fchem.2022.839470)
Supplement: Supplementary file 1 [file DataSheet1.ZIP › Table S3-Intact N-glycopeptides identified from HepG2 cells using five methods.xls]

## Sheet: EThcD-R1
Query #:z	Protein Rank	Peptide < ProteinMetrics Confidential >	Glycans NHFAGNa	Modification Type(s)	Observed m/z	z	Observed (M+H)	Calc. mass (M+H)	Off-by-x error	Mass error (ppm)	Starting position	Cleavage	Score	Delta	Delta Mod	|Log Prob|	# of unique peptides	Protein Name	Protein DB number	Comment	Scan #	Scan Time
03478:3	3	K.VASVININPN[+2018.708]TTHSTGSC[+57.021]R.S	HexNAc(3)Hex(6)Fuc(1)NeuAc(1)	C[+57], N[+2019]	1349.57	3	4046.7	4046.7	0	-0.9	248	Specific	201.09	60.3	60.3	4.66	23	>sp|P13473|LAMP2_HUMAN Lysosome-associated membrane glycoprotein 2 OS=Homo sapiens OX=9606 GN=LAMP2 PE=1 SV=2	6694	20210911_zy_cell_ethcd_1.3830.3830.3	controllerType=0 controllerNumber=1 scan=3830	17.7466
02657:3	76	K.YRDFQHLLN[+2026.687]R.T	HexNAc(2)Hex(10)	N[+2027]	1130.14	3	3388.39	3388.39	0	-0.8	229	Specific	202.32	131.93	131.93	3.91	2	>sp|Q13444|ADA15_HUMAN Disintegrin and metalloproteinase domain-containing protein 15 OS=Homo sapiens OX=9606 GN=ADAM15 PE=1 SV=4	339	20210911_zy_cell_ethcd_1.2928.2928.3	controllerType=0 controllerNumber=1 scan=2928	13.632
02416:2	112	R.VIYN[+1702.581]LTEK.G	HexNAc(2)Hex(8)	N[+1703]	1341.57	2	2682.13	2682.13	0	-0.6	425	Specific	202.34	98.42	98.42	4.39	1	>sp|Q969V3|NCLN_HUMAN Nicalin OS=Homo sapiens OX=9606 GN=NCLN PE=1 SV=2	10863	20210911_zy_cell_ethcd_1.2663.2663.2	controllerType=0 controllerNumber=1 scan=2663	12.4259
02157:3	115	R.DN[+1864.634]ATLQATLHAAR.D	HexNAc(2)Hex(9)	N[+1865]	1082.79	3	3246.35	3246.35	0	-0.9	2422	Specific	202.88	72.3	72.3	4.31	2	>sp|O15230|LAMA5_HUMAN Laminin subunit alpha-5 OS=Homo sapiens OX=9606 GN=LAMA5 PE=1 SV=8	2334	20210911_zy_cell_ethcd_1.2379.2379.3	controllerType=0 controllerNumber=1 scan=2379	11.1185
04106:3	56	R.GN[+2391.857]ITEYQC[+57.021]HQYITK.M	HexNAc(5)Hex(4)Fuc(1)NeuAc(2)	C[+57], N[+2392]	1383.23	3	4147.67	4146.67	1	-2.7	209	Specific	203.33	74.52	63.81	4.03	2	>sp|Q92896|GSLG1_HUMAN Golgi apparatus protein 1 OS=Homo sapiens OX=9606 GN=GLG1 PE=1 SV=2	13270	20210911_zy_cell_ethcd_1.4519.4519.3	controllerType=0 controllerNumber=1 scan=4519	20.8707
04673:3	15	R.TILVDNNTWN[+2026.687]NTHISR.V	HexNAc(2)Hex(10)	N[+2027]	1308.88	3	3924.63	3924.64	0	-2.3	539	Specific	203.36	73.34	54.68	4.34	4	>sp|P46977|STT3A_HUMAN Dolichyl-diphosphooligosaccharide--protein glycosyltransferase subunit STT3A OS=Homo sapiens OX=9606 GN=STT3A PE=1 SV=2	18762	20210911_zy_cell_ethcd_1.5142.5142.3	controllerType=0 controllerNumber=1 scan=5142	23.6903
08054:3	43	R.LSAVNSIFLSHN[+2350.830]NTK.E	HexNAc(4)Hex(5)Fuc(1)NeuAc(2)	N[+2351]	1332.57	3	3995.7	3995.7	0	-0.9	442	Specific	203.93	86.11	86.11	4.49	6	>sp|P48960|CD97_HUMAN CD97 antigen OS=Homo sapiens OX=9606 GN=CD97 PE=1 SV=4	8146	20210911_zy_cell_ethcd_1.8923.8923.3	controllerType=0 controllerNumber=1 scan=8923	40.6079
02700:3	128	R.EASIVGEN[+1864.634]ETYPR.A	HexNAc(2)Hex(9)	N[+1865]	1110.45	3	3329.33	3329.33	0	-0.6	601	Specific	204.06	115.36	115.36	1.97	1	>sp|Q9UBV2|SE1L1_HUMAN Protein sel-1 homolog 1 OS=Homo sapiens OX=9606 GN=SEL1L PE=1 SV=3	14445	20210911_zy_cell_ethcd_1.2975.2975.3	controllerType=0 controllerNumber=1 scan=2975	13.8407
00617:3	12	R.YHN[+1702.581]QTLR.Y	HexNAc(2)Hex(8)	N[+1703]	878.689	3	2634.05	2634.06	0	-0.9	398	Specific	204.44	51.42	51.42	3.65	15	>sp|P11717|MPRI_HUMAN Cation-independent mannose-6-phosphate receptor OS=Homo sapiens OX=9606 GN=IGF2R PE=1 SV=3	12317	20210911_zy_cell_ethcd_1.687.687.3	controllerType=0 controllerNumber=1 scan=687	3.299
00967:3	50	R.RPSTAN[+2059.735]VTR.A	HexNAc(4)Hex(5)Fuc(1)NeuAc(1)	N[+2060]	1021.1	3	3061.28	3061.28	0	-1.3	92	Specific	204.93	82.32	82.32	3.82	5	>sp|P0CW18|PRS56_HUMAN Serine protease 56 OS=Homo sapiens OX=9606 GN=PRSS56 PE=1 SV=1	12249	20210911_zy_cell_ethcd_1.1072.1072.3	controllerType=0 controllerNumber=1 scan=1072	5.1067
01919:3	14	K.KWGHN[+1378.476]ITEFQQR.F	HexNAc(2)Hex(6)	N[+1378]	974.756	3	2922.25	2922.25	0	0.4	276	Specific	205.32	55.62	55.62	3.66	7	>sp|Q96HE7|ERO1A_HUMAN ERO1-like protein alpha OS=Homo sapiens OX=9606 GN=ERO1A PE=1 SV=2	2944	20210911_zy_cell_ethcd_1.2118.2118.3	controllerType=0 controllerNumber=1 scan=2118	9.9513
02192:3	10	R.EAGN[+1913.677]HTSGAGLVQINK.S	HexNAc(4)Hex(5)NeuAc(1)	N[+1914]	1170.5	3	3509.49	3509.49	0	-0.2	80	Specific	205.37	68.85	68.85	4.66	11	>sp|P20645|MPRD_HUMAN Cation-dependent mannose-6-phosphate receptor OS=Homo sapiens OX=9606 GN=M6PR PE=1 SV=1	11960	20210911_zy_cell_ethcd_1.2417.2417.3	controllerType=0 controllerNumber=1 scan=2417	11.2921
01503:2	23	R.DAGVVC[+57.021]TN[+1702.581]ETR.S	HexNAc(2)Hex(8)	C[+57], N[+1703]	1462.57	2	2924.13	2924.13	0	-0.7	118	Specific	206.09	75.97	75.97	4.21	6	>sp|Q08380|LG3BP_HUMAN Galectin-3-binding protein OS=Homo sapiens OX=9606 GN=LGALS3BP PE=1 SV=1	4876	20210911_zy_cell_ethcd_1.1661.1661.2	controllerType=0 controllerNumber=1 scan=1661	7.8618
03448:2	6	K.IYIPLN[+1702.581]K.T	HexNAc(2)Hex(8)	N[+1703]	1282.06	2	2563.11	2563.11	0	0.1	40	Specific	206.3	136.49	136.49	3.77	12	>sp|Q92542|NICA_HUMAN Nicastrin OS=Homo sapiens OX=9606 GN=NCSTN PE=1 SV=2	7240	20210911_zy_cell_ethcd_1.3797.3797.2	controllerType=0 controllerNumber=1 scan=3797	17.5964
02456:3	105	R.EEAMLYHN[+1702.581]QTAELR.E	HexNAc(2)Hex(8)	N[+1703]	1136.46	3	3407.38	3407.38	0	-1.5	354	Specific	207.07	130.49	130.49	4.62	1	>sp|Q92791|SC65_HUMAN Endoplasmic reticulum protein SC65 OS=Homo sapiens OX=9606 GN=P3H4 PE=1 SV=1	15008	20210911_zy_cell_ethcd_1.2707.2707.3	controllerType=0 controllerNumber=1 scan=2707	12.6249
04888:3	3	K.VASVININPN[+2715.963]TTHSTGSC[+57.021]R.S	HexNAc(5)Hex(6)Fuc(1)NeuAc(2)	C[+57], N[+2716]	1581.99	3	4743.96	4743.96	0	0.5	248	Specific	207.53	101.95	101.95	4.3	23	>sp|P13473|LAMP2_HUMAN Lysosome-associated membrane glycoprotein 2 OS=Homo sapiens OX=9606 GN=LAMP2 PE=1 SV=2	6694	20210911_zy_cell_ethcd_1.5378.5378.3	controllerType=0 controllerNumber=1 scan=5378	24.7675
07923:3	43	R.LSAVNSIFLSHN[+2350.830]NTK.E	HexNAc(4)Hex(5)Fuc(1)NeuAc(2)	N[+2351]	1332.57	3	3995.7	3995.7	0	0.4	442	Specific	207.57	112.46	112.46	4	6	>sp|P48960|CD97_HUMAN CD97 antigen OS=Homo sapiens OX=9606 GN=CD97 PE=1 SV=4	8146	20210911_zy_cell_ethcd_1.8768.8768.3	controllerType=0 controllerNumber=1 scan=8768	39.9272
02767:3	27	R.KIPAIN[+1702.581]QTITEANEK.T	HexNAc(2)Hex(8)	N[+1703]	1124.83	3	3372.49	3372.49	0	-1.6	1390	Specific	208.18	133.1	133.1	4.62	8	>sp|P11047|LAMC1_HUMAN Laminin subunit gamma-1 OS=Homo sapiens OX=9606 GN=LAMC1 PE=1 SV=3	4746	20210911_zy_cell_ethcd_1.3048.3048.3	controllerType=0 controllerNumber=1 scan=3048	14.1732
00677:3	12	R.YHN[+1702.581]QTLR.Y	HexNAc(2)Hex(8)	N[+1703]	878.689	3	2634.05	2634.06	0	-1.1	398	Specific	209.5	57.18	57.18	3.65	15	>sp|P11717|MPRI_HUMAN Cation-independent mannose-6-phosphate receptor OS=Homo sapiens OX=9606 GN=IGF2R PE=1 SV=3	12317	20210911_zy_cell_ethcd_1.753.753.3	controllerType=0 controllerNumber=1 scan=753	3.6126
04757:2	59	R.AQFTFFN[+1702.581]K.T	HexNAc(2)Hex(8)	N[+1703]	1353.05	2	2705.09	2705.09	0	0.6	744	Specific	209.97	52.73	52.73	3.81	5	>sp|Q86SQ4|AGRG6_HUMAN Adhesion G-protein coupled receptor G6 OS=Homo sapiens OX=9606 GN=ADGRG6 PE=1 SV=3	642	20210911_zy_cell_ethcd_1.5234.5234.3	controllerType=0 controllerNumber=1 scan=5234	24.1114
00765:3	1	R.N[+2569.905]ATR.Y	HexNAc(5)Hex(6)NeuAc(2)	N[+2570]	1011.05	3	3031.15	3031.15	0	-0.5	107	Specific	210.89	34.98	34.98	0.83	48	>sp|P11279|LAMP1_HUMAN Lysosome-associated membrane glycoprotein 1 OS=Homo sapiens OX=9606 GN=LAMP1 PE=1 SV=3	4405	20210911_zy_cell_ethcd_1.849.849.3	controllerType=0 controllerNumber=1 scan=849	4.0596
01361:3	33	K.SQNRPQGQSTQPSNAAGTN[+406.159]TTSASTPR.S	HexNAc(2)	N[+406]	1050.82	3	3150.45	3150.45	0	-0.9	104	Specific	212.55	139.65	139.65	4.07	2	>sp|Q9UHD9|UBQL2_HUMAN Ubiquilin-2 OS=Homo sapiens OX=9606 GN=UBQLN2 PE=1 SV=2	18505	20210911_zy_cell_ethcd_1.1505.1505.3	controllerType=0 controllerNumber=1 scan=1505	7.1554
04347:3	37	K.VPLQSAHLYYN[+1540.529]VTEK.V	HexNAc(2)Hex(7)	N[+1541]	1101.49	3	3302.44	3302.45	0	-0.6	530	Specific	213.1	131.45	131.45	4.62	5	>sp|Q32P28|P3H1_HUMAN Prolyl 3-hydroxylase 1 OS=Homo sapiens OX=9606 GN=P3H1 PE=1 SV=2	15467	20210911_zy_cell_ethcd_1.4784.4784.3	controllerType=0 controllerNumber=1 scan=4784	22.082
01452:3	22	R.GN[+3007.058]VTQHVQGHR.N	HexNAc(5)Hex(6)Fuc(1)NeuAc(3)	N[+3007]	1413.9	3	4239.68	4239.68	0	-0.7	76	Specific	213.18	46.19	46.19	4.23	6	>sp|Q15043|S39AE_HUMAN Zinc transporter ZIP14 OS=Homo sapiens OX=9606 GN=SLC39A14 PE=1 SV=3	16204	20210911_zy_cell_ethcd_1.1605.1605.3	controllerType=0 controllerNumber=1 scan=1605	7.6065
01630:3	38	R.FNQC[+57.021]N[+2350.830]TTR.G	HexNAc(4)Hex(5)Fuc(1)NeuAc(2)	C[+57], N[+2351]	1131.1	3	3391.29	3391.29	0	-0.4	137	Specific	215	51.95	51.95	3.65	9	>sp|P09923|PPBI_HUMAN Intestinal-type alkaline phosphatase OS=Homo sapiens OX=9606 GN=ALPI PE=1 SV=2	15196	20210911_zy_cell_ethcd_1.1801.1801.3	controllerType=0 controllerNumber=1 scan=1801	8.5056
02280:2	3	R.VQPFN[+1581.555]VTQGK.Y	HexNAc(3)Hex(6)	N[+1582]	1350.08	2	2699.15	2699.16	0	-0.7	352	Specific	215.48	126.55	126.55	4.51	23	>sp|P13473|LAMP2_HUMAN Lysosome-associated membrane glycoprotein 2 OS=Homo sapiens OX=9606 GN=LAMP2 PE=1 SV=2	6694	20210911_zy_cell_ethcd_1.2514.2514.2	controllerType=0 controllerNumber=1 scan=2514	11.7405
03966:2	44	R.N[+1864.634]VSTNVFFK.Q	HexNAc(2)Hex(9)	N[+1865]	1460.6	2	2920.19	2920.19	0	0.1	337	Specific	217.35	148.17	148.17	4.51	8	>sp|Q6YHK3|CD109_HUMAN CD109 antigen OS=Homo sapiens OX=9606 GN=CD109 PE=1 SV=2	8627	20210911_zy_cell_ethcd_1.4365.4365.2	controllerType=0 controllerNumber=1 scan=4365	20.1621
01990:2	36	R.TVN[+1378.476]VSVPK.K	HexNAc(2)Hex(6)	N[+1378]	1111.49	2	2221.97	2221.97	0	-1	89	Specific	218.15	140.64	140.64	4.51	4	>sp|Q96KA5|CLP1L_HUMAN Cleft lip and palate transmembrane protein 1-like protein OS=Homo sapiens OX=9606 GN=CLPTM1L PE=1 SV=1	1199	20210911_zy_cell_ethcd_1.2196.2196.2	controllerType=0 controllerNumber=1 scan=2196	10.3021
09373:3	107	R.RPPLAELAALN[+1702.581]LSGSR.L	HexNAc(2)Hex(8)	N[+1703]	1123.18	3	3367.52	3367.53	0	-0.6	114	Specific	218.27	137.52	137.52	4.45	1	>sp|Q13641|TPBG_HUMAN Trophoblast glycoprotein OS=Homo sapiens OX=9606 GN=TPBG PE=1 SV=1	16904	20210911_zy_cell_ethcd_1.10656.10656.3	controllerType=0 controllerNumber=1 scan=10656	47.7259
02092:2	12	K.TN[+1702.581]ITLVC[+57.021]K.P	HexNAc(2)Hex(8)	C[+57], N[+1703]	1326.05	2	2651.1	2651.1	0	-0.1	580	Specific	219.08	99.96	99.96	4.39	15	>sp|P11717|MPRI_HUMAN Cation-independent mannose-6-phosphate receptor OS=Homo sapiens OX=9606 GN=IGF2R PE=1 SV=3	12317	20210911_zy_cell_ethcd_1.2308.2308.2	controllerType=0 controllerNumber=1 scan=2308	10.8046
03119:3	4	R.THN[+2018.708]LTDLSPHLR.Y	HexNAc(3)Hex(6)Fuc(1)NeuAc(1)	N[+2019]	1141.49	3	3422.45	3422.45	0	-0.6	977	Specific	220.07	38.97	38.97	3.67	23	>sp|P32004|L1CAM_HUMAN Neural cell adhesion molecule L1 OS=Homo sapiens OX=9606 GN=L1CAM PE=1 SV=2	3537	20210911_zy_cell_ethcd_1.3435.3435.3	controllerType=0 controllerNumber=1 scan=3435	15.937
02439:3	4	R.THN[+1768.640]LTDLSPHLR.Y	HexNAc(4)Hex(5)Fuc(1)	N[+1769]	1058.13	3	3172.38	3172.38	0	0.3	977	Specific	220.74	75.79	75.79	3.89	23	>sp|P32004|L1CAM_HUMAN Neural cell adhesion molecule L1 OS=Homo sapiens OX=9606 GN=L1CAM PE=1 SV=2	3537	20210911_zy_cell_ethcd_1.2688.2688.3	controllerType=0 controllerNumber=1 scan=2688	12.541
01066:2	52	K.GPTN[+1864.634]NTC[+57.021]VVR.T	HexNAc(2)Hex(9)	C[+57], N[+1865]	1491.59	2	2982.18	2982.18	0	0.2	1438	Specific	220.87	101.74	101.74	4.39	4	>sp|Q8TEM1|PO210_HUMAN Nuclear pore membrane glycoprotein 210 OS=Homo sapiens OX=9606 GN=NUP210 PE=1 SV=3	3187	20210911_zy_cell_ethcd_1.1181.1181.2	controllerType=0 controllerNumber=1 scan=1181	5.6274
00791:3	12	K.M[+15.995]N[+1702.581]FTGGDTC[+57.021]HK.V	HexNAc(2)Hex(8)	C[+57], M[+16], N[+1703]	996.036	3	2986.09	2986.1	0	-1	1311	Specific	220.94	141.3	141.3	4.51	15	>sp|P11717|MPRI_HUMAN Cation-independent mannose-6-phosphate receptor OS=Homo sapiens OX=9606 GN=IGF2R PE=1 SV=3	12317	20210911_zy_cell_ethcd_1.878.878.3	controllerType=0 controllerNumber=1 scan=878	4.1873
01641:2	97	R.NN[+1864.634]ISLVK.F	HexNAc(2)Hex(9)	N[+1865]	1326.55	2	2652.1	2652.1	0	-0.1	913	Specific	220.97	99.87	99.87	3.72	6	>sp|Q9UHN6|CEIP2_HUMAN Cell surface hyaluronidase OS=Homo sapiens OX=9606 GN=CEMIP2 PE=1 SV=1	1119	20210911_zy_cell_ethcd_1.1813.1813.2	controllerType=0 controllerNumber=1 scan=1813	8.5588
03668:3	2	K.LRNPC[+57.021]TSEQN[+1710.598]C[+57.021]TSPFSYK.N	HexNAc(3)Hex(5)NeuAc(1)	C[+57]*2, N[+1711]	1300.53	3	3899.57	3899.57	0	-1.1	203	Specific	222.17	107.55	107.55	4.64	24	>sp|P05556|ITB1_HUMAN Integrin beta-1 OS=Homo sapiens OX=9606 GN=ITGB1 PE=1 SV=2	3061	20210911_zy_cell_ethcd_1.4038.4038.3	controllerType=0 controllerNumber=1 scan=4038	18.6806
02331:2	1	R.LLNINPN[+1768.640]K.T	HexNAc(4)Hex(5)Fuc(1)	N[+1769]	1347.6	2	2694.19	2694.19	0	0.2	255	Specific	222.86	87.36	87.36	4.39	48	>sp|P11279|LAMP1_HUMAN Lysosome-associated membrane glycoprotein 1 OS=Homo sapiens OX=9606 GN=LAMP1 PE=1 SV=3	4405	20210911_zy_cell_ethcd_1.2570.2570.2	controllerType=0 controllerNumber=1 scan=2570	11.9981
01355:2	10	K.PLFN[+1702.581]K.S	HexNAc(2)Hex(8)	N[+1703]	1160.97	2	2320.94	2320.94	0	-0.8	54	Specific	224.49	10.67	10.67	1.78	11	>sp|P20645|MPRD_HUMAN Cation-dependent mannose-6-phosphate receptor OS=Homo sapiens OX=9606 GN=M6PR PE=1 SV=1	11960	20210911_zy_cell_ethcd_1.1499.1499.2	controllerType=0 controllerNumber=1 scan=1499	7.1256
03029:3	8	R.IAPASN[+1216.423]VSHTVVLRPLK.A	HexNAc(2)Hex(5)	N[+1216]	1006.83	3	3018.48	3018.49	0	-2.7	83	Specific	225.83	184.51	184.51	4.76	8	>sp|P43308|SSRB_HUMAN Translocon-associated protein subunit beta OS=Homo sapiens OX=9606 GN=SSR2 PE=1 SV=1	13071	20210911_zy_cell_ethcd_1.3336.3336.3	controllerType=0 controllerNumber=1 scan=3336	15.4842
02595:3	30	R.EQIN[+1702.581]ITLDHR.C	HexNAc(2)Hex(8)	N[+1703]	981.08	3	2941.22	2941.23	0	-1.8	194	Specific	227.3	120.75	120.75	4.39	10	>sp|Q02809|PLOD1_HUMAN Procollagen-lysine,2-oxoglutarate 5-dioxygenase 1 OS=Homo sapiens OX=9606 GN=PLOD1 PE=1 SV=2	10199	20210911_zy_cell_ethcd_1.2860.2860.3	controllerType=0 controllerNumber=1 scan=2860	13.3192
03589:3	130	K.SC[+57.021]VAVTSAQPQN[+2204.772]MSR.R	HexNAc(4)Hex(5)NeuAc(2)	C[+57], N[+2205]	1280.85	3	3840.53	3840.53	0	0.2	517	Specific	229.45	116.63	116.63	1.97	1	>sp|O15031|PLXB2_HUMAN Plexin-B2 OS=Homo sapiens OX=9606 GN=PLXNB2 PE=1 SV=3	14843	20210911_zy_cell_ethcd_1.3951.3951.3	controllerType=0 controllerNumber=1 scan=3951	18.2958
04448:3	28	R.VTPAC[+57.021]N[+3007.058]TSLPAQR.W	HexNAc(5)Hex(6)Fuc(1)NeuAc(3)	C[+57], N[+3007]	1474.59	3	4421.77	4421.77	0	-0.5	64	Specific	230.08	62.01	62.01	3.69	11	>sp|Q9UBG0|MRC2_HUMAN C-type mannose receptor 2 OS=Homo sapiens OX=9606 GN=MRC2 PE=1 SV=2	16756	20210911_zy_cell_ethcd_1.4895.4895.3	controllerType=0 controllerNumber=1 scan=4895	22.5803
03036:3	8	R.IAPASN[+1378.476]VSHTVVLRPLK.A	HexNAc(2)Hex(6)	N[+1378]	1060.85	3	3180.54	3180.54	0	-0.2	83	Specific	230.95	230.95	230.95	5.12	8	>sp|P43308|SSRB_HUMAN Translocon-associated protein subunit beta OS=Homo sapiens OX=9606 GN=SSR2 PE=1 SV=1	13071	20210911_zy_cell_ethcd_1.3344.3344.3	controllerType=0 controllerNumber=1 scan=3344	15.5187
01655:3	38	R.FNQC[+57.021]N[+2715.963]TTR.G	HexNAc(5)Hex(6)Fuc(1)NeuAc(2)	C[+57], N[+2716]	1252.81	3	3756.42	3756.42	0	0.2	137	Specific	231.31	50.94	50.94	3.65	9	>sp|P09923|PPBI_HUMAN Intestinal-type alkaline phosphatase OS=Homo sapiens OX=9606 GN=ALPI PE=1 SV=2	15196	20210911_zy_cell_ethcd_1.1828.1828.3	controllerType=0 controllerNumber=1 scan=1828	8.6318
01086:3	1	R.KDN[+2350.830]TTVTR.L	HexNAc(4)Hex(5)Fuc(1)NeuAc(2)	N[+2351]	1095.78	3	3285.32	3285.33	0	-1.9	247	Specific	231.64	42.47	42.47	2.69	48	>sp|P11279|LAMP1_HUMAN Lysosome-associated membrane glycoprotein 1 OS=Homo sapiens OX=9606 GN=LAMP1 PE=1 SV=3	4405	20210911_zy_cell_ethcd_1.1203.1203.3	controllerType=0 controllerNumber=1 scan=1203	5.7305
01721:3	6	K.PIN[+1864.634]TTGTLKPDDR.V	HexNAc(2)Hex(9)	N[+1865]	1098.13	3	3292.38	3292.38	0	0.4	262	Specific	233.07	98.6	98.6	4	12	>sp|Q92542|NICA_HUMAN Nicastrin OS=Homo sapiens OX=9606 GN=NCSTN PE=1 SV=2	7240	20210911_zy_cell_ethcd_1.1901.1901.3	controllerType=0 controllerNumber=1 scan=1901	8.9645
00937:3	92	R.QRYPAN[+1702.581]C[+57.021]TVR.D	HexNAc(2)Hex(8)	C[+57], N[+1703]	989.738	3	2967.2	2967.2	0	-0.8	152	Specific	233.35	134.93	134.93	4.12	2	>sp|Q9BRN9|TM2D3_HUMAN TM2 domain-containing protein 3 OS=Homo sapiens OX=9606 GN=TM2D3 PE=2 SV=2	3267	20210911_zy_cell_ethcd_1.1039.1039.3	controllerType=0 controllerNumber=1 scan=1039	4.9522
00771:2	30	K.YIHQN[+1216.423]YTK.A	HexNAc(2)Hex(5)	N[+1216]	1141.98	2	2282.95	2282.95	0	-0.9	534	Specific	233.81	113.32	113.32	4.41	10	>sp|Q02809|PLOD1_HUMAN Procollagen-lysine,2-oxoglutarate 5-dioxygenase 1 OS=Homo sapiens OX=9606 GN=PLOD1 PE=1 SV=2	10199	20210911_zy_cell_ethcd_1.856.856.3	controllerType=0 controllerNumber=1 scan=856	4.0905
01396:2	87	K.N[+1702.581]STAYFR.G	HexNAc(2)Hex(8)	N[+1703]	1281	2	2560.99	2560.99	0	-0.1	204	Specific	234.44	171.14	171.14	3.81	3	>sp|Q8NBL1|PGLT1_HUMAN Protein O-glucosyltransferase 1 OS=Homo sapiens OX=9606 GN=POGLUT1 PE=1 SV=1	12272	20210911_zy_cell_ethcd_1.1544.1544.2	controllerType=0 controllerNumber=1 scan=1544	7.3331
03272:2	86	R.NYFLVN[+1702.581]GTSR.E	HexNAc(2)Hex(8)	N[+1703]	1437.09	2	2873.17	2873.17	0	0.6	190	Specific	234.79	81.84	81.84	3.81	1	>sp|P15509|CSF2R_HUMAN Granulocyte-macrophage colony-stimulating factor receptor subunit alpha OS=Homo sapiens OX=9606 GN=CSF2RA PE=1 SV=1	5252	20210911_zy_cell_ethcd_1.3603.3603.3	controllerType=0 controllerNumber=1 scan=3603	16.7084
02554:4	9	R.FTFTSHTPGEHQIC[+57.021]LHSN[+1540.529]STK.F	HexNAc(2)Hex(7)	C[+57], N[+1541]	993.168	4	3969.65	3969.66	0	-1.7	108	Specific	235.13	181.25	181.25	4.07	4	>sp|Q9BVK6|TMED9_HUMAN Transmembrane emp24 domain-containing protein 9 OS=Homo sapiens OX=9606 GN=TMED9 PE=1 SV=2	14554	20210911_zy_cell_ethcd_1.2815.2815.3	controllerType=0 controllerNumber=1 scan=2815	13.1145
03205:2	78	K.SAEGTFFIN[+1702.581]K.T	HexNAc(2)Hex(8)	N[+1703]	1408.57	2	2816.14	2816.14	0	0.5	149	Specific	235.44	151.86	151.86	4.02	3	>sp|P06865|HEXA_HUMAN Beta-hexosaminidase subunit alpha OS=Homo sapiens OX=9606 GN=HEXA PE=1 SV=2	13346	20210911_zy_cell_ethcd_1.3529.3529.2	controllerType=0 controllerNumber=1 scan=3529	16.3686
02188:2	1	R.LLNINPN[+1864.634]K.T	HexNAc(2)Hex(9)	N[+1865]	1395.59	2	2790.18	2790.18	0	0.5	255	Specific	235.49	89.57	89.57	3.93	48	>sp|P11279|LAMP1_HUMAN Lysosome-associated membrane glycoprotein 1 OS=Homo sapiens OX=9606 GN=LAMP1 PE=1 SV=3	4405	20210911_zy_cell_ethcd_1.2413.2413.2	controllerType=0 controllerNumber=1 scan=2413	11.2715
02268:2	3	R.VQPFN[+1378.476]VTQGK.Y	HexNAc(2)Hex(6)	N[+1378]	1248.54	2	2496.08	2496.08	0	-0.3	352	Specific	236.13	126.59	126.59	4.51	23	>sp|P13473|LAMP2_HUMAN Lysosome-associated membrane glycoprotein 2 OS=Homo sapiens OX=9606 GN=LAMP2 PE=1 SV=2	6694	20210911_zy_cell_ethcd_1.2501.2501.2	controllerType=0 controllerNumber=1 scan=2501	11.6772
05913:3	21	R.SAN[+1702.581]STLAQALHWTR.S	HexNAc(2)Hex(8)	N[+1703]	1086.8	3	3258.38	3258.38	0	-0.7	614	Specific	236.97	85.21	85.21	4.49	3	>sp|Q9BU23|LMF2_HUMAN Lipase maturation factor 2 OS=Homo sapiens OX=9606 GN=LMF2 PE=1 SV=2	7424	20210911_zy_cell_ethcd_1.6506.6506.3	controllerType=0 controllerNumber=1 scan=6506	29.8236
02008:2	58	R.N[+1864.634]WTITR.L	HexNAc(2)Hex(9)	N[+1865]	1328.03	2	2655.06	2655.05	0	0.2	651	Specific	237.03	86.34	86.34	3.72	6	>sp|P19022|CADH2_HUMAN Cadherin-2 OS=Homo sapiens OX=9606 GN=CDH2 PE=1 SV=4	1389	20210911_zy_cell_ethcd_1.2216.2216.2	controllerType=0 controllerNumber=1 scan=2216	10.3935
02137:3	1	R.LLNINPN[+2864.036]K.T	HexNAc(7)Hex(8)Fuc(1)	N[+2864]	1263.87	3	3789.58	3789.58	0	-0.2	255	Specific	237.5	124.12	124.12	3.77	48	>sp|P11279|LAMP1_HUMAN Lysosome-associated membrane glycoprotein 1 OS=Homo sapiens OX=9606 GN=LAMP1 PE=1 SV=3	4405	20210911_zy_cell_ethcd_1.2357.2357.3	controllerType=0 controllerNumber=1 scan=2357	11.0211
01763:2	13	R.N[+1540.529]TTFNVESTK.K	HexNAc(2)Hex(7)	N[+1541]	1341.04	2	2681.08	2681.08	0	-0.3	418	Specific	237.9	151.68	151.68	4.51	11	>sp|P56199|ITA1_HUMAN Integrin alpha-1 OS=Homo sapiens OX=9606 GN=ITGA1 PE=1 SV=2	9701	20210911_zy_cell_ethcd_1.1947.1947.2	controllerType=0 controllerNumber=1 scan=1947	9.1799
04368:2	102	R.N[+1702.581]STIEAANLAGLK.I	HexNAc(2)Hex(8)	N[+1703]	1502.65	2	3004.29	3004.29	0	0.1	184	Specific	239.26	206.23	206.23	4.71	1	>sp|P48723|HSP13_HUMAN Heat shock 70 kDa protein 13 OS=Homo sapiens OX=9606 GN=HSPA13 PE=1 SV=1	11660	20210911_zy_cell_ethcd_1.4807.4807.2	controllerType=0 controllerNumber=1 scan=4807	22.1842
01386:3	50	R.RPSTAN[+2350.830]VTR.A	HexNAc(4)Hex(5)Fuc(1)NeuAc(2)	N[+2351]	1118.13	3	3352.38	3352.38	0	-0.9	92	Specific	239.26	84.18	84.18	3.93	5	>sp|P0CW18|PRS56_HUMAN Serine protease 56 OS=Homo sapiens OX=9606 GN=PRSS56 PE=1 SV=1	12249	20210911_zy_cell_ethcd_1.1533.1533.3	controllerType=0 controllerNumber=1 scan=1533	7.2806
06141:3	64	R.ELAVPDGYTN[+2350.830]R.T	HexNAc(4)Hex(5)Fuc(1)NeuAc(2)	N[+2351]	1195.82	3	3585.43	3585.44	0	-0.6	77	Specific	239.26	62.23	62.23	3.65	5	>sp|P26006|ITA3_HUMAN Integrin alpha-3 OS=Homo sapiens OX=9606 GN=ITGA3 PE=1 SV=5	6507	20210911_zy_cell_ethcd_1.6757.6757.3	controllerType=0 controllerNumber=1 scan=6757	30.9527
03488:3	3	K.VASVININPN[+1872.651]TTHSTGSC[+57.021]R.S	HexNAc(3)Hex(6)NeuAc(1)	C[+57], N[+1873]	1300.89	3	3900.64	3900.64	0	0.1	248	Specific	240.85	107.66	107.66	5.33	23	>sp|P13473|LAMP2_HUMAN Lysosome-associated membrane glycoprotein 2 OS=Homo sapiens OX=9606 GN=LAMP2 PE=1 SV=2	6694	20210911_zy_cell_ethcd_1.3841.3841.3	controllerType=0 controllerNumber=1 scan=3841	17.7967
07737:3	38	K.HQGAWYVWN[+2204.772]R.T	HexNAc(4)Hex(5)NeuAc(2)	N[+2205]	1174.47	3	3521.4	3521.4	0	-0.8	260	Specific	241.39	118.75	118.75	5.4	9	>sp|P09923|PPBI_HUMAN Intestinal-type alkaline phosphatase OS=Homo sapiens OX=9606 GN=ALPI PE=1 SV=2	15196	20210911_zy_cell_ethcd_1.8555.8555.3	controllerType=0 controllerNumber=1 scan=8555	38.9835
01510:2	135	R.N[+1913.677]LSISTK.N	HexNAc(4)Hex(5)NeuAc(1)	N[+1914]	1338.56	2	2676.11	2676.11	0	-1.1	674	Specific	241.62	29.35	29.35	1.55	6	>sp|A8K979|ERI2_HUMAN ERI1 exoribonuclease 2 OS=Homo sapiens OX=9606 GN=ERI2 PE=2 SV=2	6188	20210911_zy_cell_ethcd_1.1669.1669.2	controllerType=0 controllerNumber=1 scan=1669	7.8999
03874:3	35	K.GRDIYTFDGALN[+1702.581]K.S	HexNAc(2)Hex(8)	N[+1703]	1058.11	3	3172.32	3172.32	0	-0.5	62	Specific	247.42	162.63	162.63	5.43	4	>sp|Q08722|CD47_HUMAN Leukocyte surface antigen CD47 OS=Homo sapiens OX=9606 GN=CD47 PE=1 SV=1	886	20210911_zy_cell_ethcd_1.4264.4264.3	controllerType=0 controllerNumber=1 scan=4264	19.701
01569:3	38	R.FNQC[+57.021]N[+2350.830]TTR.G	HexNAc(4)Hex(5)Fuc(1)NeuAc(2)	C[+57], N[+2351]	1131.1	3	3391.29	3391.29	0	-0.9	137	Specific	248.03	98.5	98.5	4.39	9	>sp|P09923|PPBI_HUMAN Intestinal-type alkaline phosphatase OS=Homo sapiens OX=9606 GN=ALPI PE=1 SV=2	15196	20210911_zy_cell_ethcd_1.1734.1734.3	controllerType=0 controllerNumber=1 scan=1734	8.2013
04734:3	15	R.TILVDNNTWN[+1540.529]NTHISR.V	HexNAc(2)Hex(7)	N[+1541]	1146.83	3	3438.47	3438.48	0	-2.3	539	Specific	248.74	170.17	83.64	5.77	4	>sp|P46977|STT3A_HUMAN Dolichyl-diphosphooligosaccharide--protein glycosyltransferase subunit STT3A OS=Homo sapiens OX=9606 GN=STT3A PE=1 SV=2	18762	20210911_zy_cell_ethcd_1.5209.5209.3	controllerType=0 controllerNumber=1 scan=5209	23.9981
04217:3	47	K.GQTEIQVNC[+57.021]PPAVTEN[+1872.651]K.T	HexNAc(3)Hex(6)NeuAc(1)	C[+57], N[+1873]	1253.19	3	3757.56	3757.56	0	-0.3	56	Specific	250.95	135.52	135.52	5	2	>sp|Q16563|SYPL1_HUMAN Synaptophysin-like protein 1 OS=Homo sapiens OX=9606 GN=SYPL1 PE=1 SV=1	16250	20210911_zy_cell_ethcd_1.4641.4641.3	controllerType=0 controllerNumber=1 scan=4641	21.4276
05450:3	34	K.GELN[+1864.634]TSIFSSRPIDK.F	HexNAc(2)Hex(9)	N[+1865]	1176.84	3	3528.49	3528.5	0	-1.2	350	Specific	252.56	148.17	148.17	5.66	6	>sp|Q9UHG3|PCYOX_HUMAN Prenylcysteine oxidase 1 OS=Homo sapiens OX=9606 GN=PCYOX1 PE=1 SV=3	9384	20210911_zy_cell_ethcd_1.5996.5996.3	controllerType=0 controllerNumber=1 scan=5996	27.5426
01282:3	12	K.MN[+2026.687]FTGGDTC[+57.021]HK.V	HexNAc(2)Hex(10)	C[+57], N[+2027]	1098.74	3	3294.2	3294.21	0	-0.9	1311	Specific	252.81	172.69	172.69	5.61	15	>sp|P11717|MPRI_HUMAN Cation-independent mannose-6-phosphate receptor OS=Homo sapiens OX=9606 GN=IGF2R PE=1 SV=3	12317	20210911_zy_cell_ethcd_1.1418.1418.3	controllerType=0 controllerNumber=1 scan=1418	6.7469
01195:3	38	R.FNQC[+57.021]N[+2059.735]TTR.G	HexNAc(4)Hex(5)Fuc(1)NeuAc(1)	C[+57], N[+2060]	1034.07	3	3100.19	3100.19	0	-1.2	137	Specific	255.93	90.85	90.85	4.39	9	>sp|P09923|PPBI_HUMAN Intestinal-type alkaline phosphatase OS=Homo sapiens OX=9606 GN=ALPI PE=1 SV=2	15196	20210911_zy_cell_ethcd_1.1323.1323.3	controllerType=0 controllerNumber=1 scan=1323	6.3011
01216:2	16	K.AMSSN[+1702.581]ETAAYK.I	HexNAc(2)Hex(8)	N[+1703]	1438.06	2	2875.11	2875.11	0	0	637	Specific	256.73	111.71	111.71	5.4	6	>sp|Q8TCJ2|STT3B_HUMAN Dolichyl-diphosphooligosaccharide--protein glycosyltransferase subunit STT3B OS=Homo sapiens OX=9606 GN=STT3B PE=1 SV=1	13685	20210911_zy_cell_ethcd_1.1346.1346.2	controllerType=0 controllerNumber=1 scan=1346	6.4066
03048:3	1	R.GHTLTLN[+1378.476]FTR.N	HexNAc(2)Hex(6)	N[+1378]	846.706	3	2538.1	2538.1	0	1.9	97	Specific	256.88	153.02	153.02	4.77	48	>sp|P11279|LAMP1_HUMAN Lysosome-associated membrane glycoprotein 1 OS=Homo sapiens OX=9606 GN=LAMP1 PE=1 SV=3	4405	20210911_zy_cell_ethcd_1.3357.3357.3	controllerType=0 controllerNumber=1 scan=3357	15.5789
04289:3	37	K.VPLQSAHLYYN[+1864.634]VTEK.V	HexNAc(2)Hex(9)	N[+1865]	1209.52	3	3626.55	3626.55	0	-0.5	530	Specific	257.09	157.92	157.92	5.66	5	>sp|Q32P28|P3H1_HUMAN Prolyl 3-hydroxylase 1 OS=Homo sapiens OX=9606 GN=P3H1 PE=1 SV=2	15467	20210911_zy_cell_ethcd_1.4720.4720.3	controllerType=0 controllerNumber=1 scan=4720	21.7861
02219:3	5	K.NN[+2350.830]HTASILDR.M	HexNAc(4)Hex(5)Fuc(1)NeuAc(2)	N[+2351]	1164.47	3	3491.41	3491.41	0	-0.2	129	Specific	257.33	75.43	75.43	5.19	17	>sp|P08962|CD63_HUMAN CD63 antigen OS=Homo sapiens OX=9606 GN=CD63 PE=1 SV=2	5151	20210911_zy_cell_ethcd_1.2447.2447.3	controllerType=0 controllerNumber=1 scan=2447	11.4299
05197:2	41	K.QNNGAFN[+203.079]ETLFR.N	HexNAc(1)	N[+203]	807.38	2	1613.75	1613.76	0	-2	721	Specific	257.68	182.48	182.48	4.6	6	>sp|P02786|TFR1_HUMAN Transferrin receptor protein 1 OS=Homo sapiens OX=9606 GN=TFRC PE=1 SV=2	16028	20210911_zy_cell_ethcd_1.5716.5716.2	controllerType=0 controllerNumber=1 scan=5716	26.2856
03016:3	8	R.IAPASN[+1702.581]VSHTVVLRPLK.A	HexNAc(2)Hex(8)	N[+1703]	1168.89	3	3504.64	3504.65	0	-1.3	83	Specific	257.71	257.71	257.71	5.68	8	>sp|P43308|SSRB_HUMAN Translocon-associated protein subunit beta OS=Homo sapiens OX=9606 GN=SSR2 PE=1 SV=1	13071	20210911_zy_cell_ethcd_1.3322.3322.3	controllerType=0 controllerNumber=1 scan=3322	15.4221
05932:3	21	R.SAN[+1702.581]STLAQALHWTR.S	HexNAc(2)Hex(8)	N[+1703]	1086.8	3	3258.38	3258.38	0	-1	614	Specific	260.68	109.38	109.38	5.52	3	>sp|Q9BU23|LMF2_HUMAN Lipase maturation factor 2 OS=Homo sapiens OX=9606 GN=LMF2 PE=1 SV=2	7424	20210911_zy_cell_ethcd_1.6527.6527.3	controllerType=0 controllerNumber=1 scan=6527	29.9157
04056:4	9	R.FTFTSHTPGEHQIC[+57.021]LHSN[+2350.830]STK.F	HexNAc(4)Hex(5)Fuc(1)NeuAc(2)	C[+57], N[+2351]	1195.74	4	4779.96	4779.96	0	-0.8	108	Specific	261.16	207.01	207.01	5.6	4	>sp|Q9BVK6|TMED9_HUMAN Transmembrane emp24 domain-containing protein 9 OS=Homo sapiens OX=9606 GN=TMED9 PE=1 SV=2	14554	20210911_zy_cell_ethcd_1.4464.4464.4	controllerType=0 controllerNumber=1 scan=4464	20.6179
01050:3	7	R.TLSRPSETC[+57.021]N[+1540.529]ETTK.L	HexNAc(2)Hex(7)	C[+57], N[+1541]	1055.43	3	3164.29	3164.29	0	-0.9	384	Specific	261.71	128.76	128.76	5.08	10	>sp|Q96AY3|FKB10_HUMAN Peptidyl-prolyl cis-trans isomerase FKBP10 OS=Homo sapiens OX=9606 GN=FKBP10 PE=1 SV=1	19614	20210911_zy_cell_ethcd_1.1163.1163.3	controllerType=0 controllerNumber=1 scan=1163	5.5416
01723:2	27	K.N[+1702.581]ISQDLEK.Q	HexNAc(2)Hex(8)	N[+1703]	1325.04	2	2649.07	2649.07	0	0.1	1241	Specific	264.21	33.37	33.37	4.15	8	>sp|P11047|LAMC1_HUMAN Laminin subunit gamma-1 OS=Homo sapiens OX=9606 GN=LAMC1 PE=1 SV=3	4746	20210911_zy_cell_ethcd_1.1903.1903.2	controllerType=0 controllerNumber=1 scan=1903	8.9741
03562:3	3	K.VASVININPN[+1872.651]TTHSTGSC[+57.021]R.S	HexNAc(3)Hex(6)NeuAc(1)	C[+57], N[+1873]	1300.89	3	3900.64	3900.64	0	0.1	248	Specific	264.89	138.76	138.76	5.47	23	>sp|P13473|LAMP2_HUMAN Lysosome-associated membrane glycoprotein 2 OS=Homo sapiens OX=9606 GN=LAMP2 PE=1 SV=2	6694	20210911_zy_cell_ethcd_1.3922.3922.3	controllerType=0 controllerNumber=1 scan=3922	18.1601
06814:3	91	R.AKPQGQWAEDVLGN[+2350.830]K.T	HexNAc(4)Hex(5)Fuc(1)NeuAc(2)	N[+2351]	1331.23	3	3991.67	3991.67	0	0.3	66	Specific	267.06	155.98	155.98	5.05	2	>sp|Q29983|MICA_HUMAN MHC class I polypeptide-related sequence A OS=Homo sapiens OX=9606 GN=MICA PE=1 SV=1	7436	20210911_zy_cell_ethcd_1.7508.7508.3	controllerType=0 controllerNumber=1 scan=7508	34.3332
07533:3	16	R.TTLVDNNTWN[+1702.581]NSHIALVGK.A	HexNAc(2)Hex(8)	N[+1703]	1267.22	3	3799.65	3799.65	0	-1.5	618	Specific	267.1	185.12	81.38	6.13	6	>sp|Q8TCJ2|STT3B_HUMAN Dolichyl-diphosphooligosaccharide--protein glycosyltransferase subunit STT3B OS=Homo sapiens OX=9606 GN=STT3B PE=1 SV=1	13685	20210911_zy_cell_ethcd_1.8320.8320.3	controllerType=0 controllerNumber=1 scan=8320	37.9301
02988:3	1	R.GHTLTLN[+2188.740]FTR.N	HexNAc(2)Hex(11)	N[+2189]	1116.79	3	3348.36	3348.36	0	-1.6	97	Specific	267.68	155.18	155.18	5.54	48	>sp|P11279|LAMP1_HUMAN Lysosome-associated membrane glycoprotein 1 OS=Homo sapiens OX=9606 GN=LAMP1 PE=1 SV=3	4405	20210911_zy_cell_ethcd_1.3291.3291.3	controllerType=0 controllerNumber=1 scan=3291	15.2803
01748:2	18	R.YN[+1378.476]C[+57.021]SIESPR.K	HexNAc(2)Hex(6)	C[+57], N[+1378]	1252.49	2	2503.97	2503.97	0	0	695	Specific	267.69	155.4	155.4	5.54	7	>sp|O00469|PLOD2_HUMAN Procollagen-lysine,2-oxoglutarate 5-dioxygenase 2 OS=Homo sapiens OX=9606 GN=PLOD2 PE=1 SV=2	15649	20210911_zy_cell_ethcd_1.1930.1930.2	controllerType=0 controllerNumber=1 scan=1930	9.1005
02288:2	1	R.LLNINPN[+1581.555]K.T	HexNAc(3)Hex(6)	N[+1582]	1254.05	2	2507.1	2507.1	0	-0.5	255	Specific	267.82	122.59	122.59	5.4	48	>sp|P11279|LAMP1_HUMAN Lysosome-associated membrane glycoprotein 1 OS=Homo sapiens OX=9606 GN=LAMP1 PE=1 SV=3	4405	20210911_zy_cell_ethcd_1.2523.2523.2	controllerType=0 controllerNumber=1 scan=2523	11.7809
02862:2	51	K.N[+1702.581]VSC[+57.021]LWC[+57.021]NTNK.A	HexNAc(2)Hex(8)	C[+57]*2, N[+1703]	1549.6	2	3098.2	3098.2	0	0.4	54	Specific	268.52	220.16	220.16	5.03	3	>sp|P53801|PTTG_HUMAN Pituitary tumor-transforming gene 1 protein-interacting protein OS=Homo sapiens OX=9606 GN=PTTG1IP PE=1 SV=1	15135	20210911_zy_cell_ethcd_1.3153.3153.2	controllerType=0 controllerNumber=1 scan=3153	14.6502
02212:2	1	R.LLNINPN[+1540.529]K.T	HexNAc(2)Hex(7)	N[+1541]	1233.54	2	2466.07	2466.08	0	-0.3	255	Specific	269.23	168.1	168.1	5.61	48	>sp|P11279|LAMP1_HUMAN Lysosome-associated membrane glycoprotein 1 OS=Homo sapiens OX=9606 GN=LAMP1 PE=1 SV=3	4405	20210911_zy_cell_ethcd_1.2439.2439.2	controllerType=0 controllerNumber=1 scan=2439	11.3916
03852:3	66	K.IN[+2350.830]ATDADEPNTLNSK.I	HexNAc(4)Hex(5)Fuc(1)NeuAc(2)	N[+2351]	1318.54	3	3953.59	3953.59	0	0	181	Specific	269.94	82.91	82.91	4.31	4	>sp|Q14126|DSG2_HUMAN Desmoglein-2 OS=Homo sapiens OX=9606 GN=DSG2 PE=1 SV=2	1442	20210911_zy_cell_ethcd_1.4240.4240.3	controllerType=0 controllerNumber=1 scan=4240	19.5942
01715:2	25	K.N[+1216.423]QSVPLSC[+57.021]C[+57.021]R.E	HexNAc(2)Hex(5)	C[+57]*2, N[+1216]	1218.99	2	2436.97	2436.97	0	-1	167	Specific	270.18	213.67	213.67	5.64	5	>sp|O60637|TSN3_HUMAN Tetraspanin-3 OS=Homo sapiens OX=9606 GN=TSPAN3 PE=2 SV=1	16532	20210911_zy_cell_ethcd_1.1894.1894.2	controllerType=0 controllerNumber=1 scan=1894	8.9341
01825:3	6	R.RPN[+1702.581]QSQPLPPSSLQR.F	HexNAc(2)Hex(8)	N[+1703]	1136.5	3	3407.5	3407.5	0	-0.1	415	Specific	271.25	187.49	187.49	5.49	12	>sp|Q92542|NICA_HUMAN Nicastrin OS=Homo sapiens OX=9606 GN=NCSTN PE=1 SV=2	7240	20210911_zy_cell_ethcd_1.2015.2015.3	controllerType=0 controllerNumber=1 scan=2015	9.4906
07599:3	38	K.HQGAWYVWN[+2204.772]R.T	HexNAc(4)Hex(5)NeuAc(2)	N[+2205]	1174.47	3	3521.4	3521.4	0	-0.8	260	Specific	271.68	132.14	132.14	5.54	9	>sp|P09923|PPBI_HUMAN Intestinal-type alkaline phosphatase OS=Homo sapiens OX=9606 GN=ALPI PE=1 SV=2	15196	20210911_zy_cell_ethcd_1.8397.8397.3	controllerType=0 controllerNumber=1 scan=8397	38.2711
01791:2	11	R.AEPPLN[+1378.476]ASASDQGEK.V	HexNAc(2)Hex(6)	N[+1378]	1446.6	2	2892.19	2892.19	0	-0.3	926	Specific	272.84	142	142	5.66	14	>sp|Q9Y4L1|HYOU1_HUMAN Hypoxia up-regulated protein 1 OS=Homo sapiens OX=9606 GN=HYOU1 PE=1 SV=1	14756	20210911_zy_cell_ethcd_1.1978.1978.2	controllerType=0 controllerNumber=1 scan=1978	9.32
01681:3	7	R.YHYN[+1702.581]GTFEDGK.K	HexNAc(2)Hex(8)	N[+1703]	1011.72	3	3033.15	3033.15	0	-1.6	67	Specific	272.9	163.39	163.39	5.61	10	>sp|Q96AY3|FKB10_HUMAN Peptidyl-prolyl cis-trans isomerase FKBP10 OS=Homo sapiens OX=9606 GN=FKBP10 PE=1 SV=1	19614	20210911_zy_cell_ethcd_1.1857.1857.3	controllerType=0 controllerNumber=1 scan=1857	8.7667
02544:3	18	R.EAIN[+1702.581]ITLDHK.C	HexNAc(2)Hex(8)	N[+1703]	952.738	3	2856.2	2856.2	0	-1.1	206	Specific	274.39	181.81	181.81	5.61	7	>sp|O00469|PLOD2_HUMAN Procollagen-lysine,2-oxoglutarate 5-dioxygenase 2 OS=Homo sapiens OX=9606 GN=PLOD2 PE=1 SV=2	15649	20210911_zy_cell_ethcd_1.2804.2804.3	controllerType=0 controllerNumber=1 scan=2804	13.0636
01125:3	32	K.HTNM[+15.995]N[+1702.581]LTQLK.V	HexNAc(2)Hex(8)	M[+16], N[+1703]	973.403	3	2918.19	2918.2	0	-1.1	250	Specific	276.33	127.65	127.65	5.54	6	>sp|Q15165|PON2_HUMAN Serum paraoxonase/arylesterase 2 OS=Homo sapiens OX=9606 GN=PON2 PE=1 SV=4	9244	20210911_zy_cell_ethcd_1.1246.1246.3	controllerType=0 controllerNumber=1 scan=1246	5.9365
02179:3	10	R.EAGN[+1872.651]HTSGAGLVQINK.S	HexNAc(3)Hex(6)NeuAc(1)	N[+1873]	1156.82	3	3468.46	3468.46	0	-1.3	80	Specific	277.72	108.76	108.76	5.91	11	>sp|P20645|MPRD_HUMAN Cation-dependent mannose-6-phosphate receptor OS=Homo sapiens OX=9606 GN=M6PR PE=1 SV=1	11960	20210911_zy_cell_ethcd_1.2403.2403.3	controllerType=0 controllerNumber=1 scan=2403	11.2276
01898:3	11	K.EN[+1378.476]GTDTVQEEEESPAEGSK.D	HexNAc(2)Hex(6)	N[+1378]	1138.78	3	3414.33	3414.33	0	-2.1	595	Specific	278.48	251.09	251.09	4.68	14	>sp|Q9Y4L1|HYOU1_HUMAN Hypoxia up-regulated protein 1 OS=Homo sapiens OX=9606 GN=HYOU1 PE=1 SV=1	14756	20210911_zy_cell_ethcd_1.2095.2095.3	controllerType=0 controllerNumber=1 scan=2095	9.846
02604:3	3	K.VASVININPN[+2133.772]TTHSTGSC[+57.021]R.S	HexNAc(5)Hex(6)Fuc(1)	C[+57], N[+2134]	1387.92	3	4161.76	4161.76	0	-1.1	248	Specific	278.52	182.77	182.77	6.13	23	>sp|P13473|LAMP2_HUMAN Lysosome-associated membrane glycoprotein 2 OS=Homo sapiens OX=9606 GN=LAMP2 PE=1 SV=2	6694	20210911_zy_cell_ethcd_1.2870.2870.3	controllerType=0 controllerNumber=1 scan=2870	13.3657
07338:2	61	K.N[+1872.651]GSLFAFR.G	HexNAc(3)Hex(6)NeuAc(1)	N[+1873]	1392.57	2	2784.12	2784.12	0	0	169	Specific	278.9	146.09	146.09	5.54	4	>sp|P04004|VTNC_HUMAN Vitronectin OS=Homo sapiens OX=9606 GN=VTN PE=1 SV=1	17960	20210911_zy_cell_ethcd_1.8100.8100.3	controllerType=0 controllerNumber=1 scan=8100	36.948
02473:3	14	K.WGHN[+1378.476]ITEFQQR.F	HexNAc(2)Hex(6)	N[+1378]	932.057	3	2794.16	2794.16	0	-0.7	277	Specific	280.68	156.08	156.08	5.44	7	>sp|Q96HE7|ERO1A_HUMAN ERO1-like protein alpha OS=Homo sapiens OX=9606 GN=ERO1A PE=1 SV=2	2944	20210911_zy_cell_ethcd_1.2726.2726.3	controllerType=0 controllerNumber=1 scan=2726	12.707
02011:2	58	R.N[+1702.581]WTITR.L	HexNAc(2)Hex(8)	N[+1703]	1247	2	2493	2493	0	-0.1	651	Specific	281.72	109.27	109.27	4.31	6	>sp|P19022|CADH2_HUMAN Cadherin-2 OS=Homo sapiens OX=9606 GN=CDH2 PE=1 SV=4	1389	20210911_zy_cell_ethcd_1.2219.2219.2	controllerType=0 controllerNumber=1 scan=2219	10.4086
04399:3	4	R.THN[+2350.830]LTDLSPHLR.Y	HexNAc(4)Hex(5)Fuc(1)NeuAc(2)	N[+2351]	1252.19	3	3754.57	3754.57	0	-0.1	977	Specific	282.27	24.67	24.67	4.2	23	>sp|P32004|L1CAM_HUMAN Neural cell adhesion molecule L1 OS=Homo sapiens OX=9606 GN=L1CAM PE=1 SV=2	3537	20210911_zy_cell_ethcd_1.4841.4841.3	controllerType=0 controllerNumber=1 scan=4841	22.3373
01028:3	1	R.KDN[+2715.963]TTVTR.L	HexNAc(5)Hex(6)Fuc(1)NeuAc(2)	N[+2716]	1217.49	3	3650.46	3650.46	0	-0.4	247	Specific	282.78	106.81	106.81	5.3	48	>sp|P11279|LAMP1_HUMAN Lysosome-associated membrane glycoprotein 1 OS=Homo sapiens OX=9606 GN=LAMP1 PE=1 SV=3	4405	20210911_zy_cell_ethcd_1.1139.1139.3	controllerType=0 controllerNumber=1 scan=1139	5.4242
00851:2	11	K.N[+1216.423]ATLAEQAK.L	HexNAc(2)Hex(5)	N[+1216]	1081.46	2	2161.92	2161.92	0	-0.6	869	Specific	283.06	197.32	197.32	5.52	14	>sp|Q9Y4L1|HYOU1_HUMAN Hypoxia up-regulated protein 1 OS=Homo sapiens OX=9606 GN=HYOU1 PE=1 SV=1	14756	20210911_zy_cell_ethcd_1.944.944.2	controllerType=0 controllerNumber=1 scan=944	4.4991
01205:2	16	K.AMSSN[+1864.634]ETAAYK.I	HexNAc(2)Hex(9)	N[+1865]	1519.08	2	3037.16	3037.16	0	-0.2	637	Specific	283.58	186.04	186.04	5.52	6	>sp|Q8TCJ2|STT3B_HUMAN Dolichyl-diphosphooligosaccharide--protein glycosyltransferase subunit STT3B OS=Homo sapiens OX=9606 GN=STT3B PE=1 SV=1	13685	20210911_zy_cell_ethcd_1.1334.1334.2	controllerType=0 controllerNumber=1 scan=1334	6.3507
04720:3	15	R.TILVDNNTWN[+1540.529]NTHISR.V	HexNAc(2)Hex(7)	N[+1541]	1146.83	3	3438.49	3438.48	0	2.3	539	Specific	283.82	170.88	78.44	5.25	4	>sp|P46977|STT3A_HUMAN Dolichyl-diphosphooligosaccharide--protein glycosyltransferase subunit STT3A OS=Homo sapiens OX=9606 GN=STT3A PE=1 SV=2	18762	20210911_zy_cell_ethcd_1.5193.5193.3	controllerType=0 controllerNumber=1 scan=5193	23.9265
02106:2	12	K.TN[+1540.529]ITLVC[+57.021]K.P	HexNAc(2)Hex(7)	C[+57], N[+1541]	1245.03	2	2489.05	2489.05	0	0.4	580	Specific	283.95	135.08	135.08	4.84	15	>sp|P11717|MPRI_HUMAN Cation-independent mannose-6-phosphate receptor OS=Homo sapiens OX=9606 GN=IGF2R PE=1 SV=3	12317	20210911_zy_cell_ethcd_1.2323.2323.2	controllerType=0 controllerNumber=1 scan=2323	10.8699
02706:3	2	R.NPC[+57.021]TSEQN[+2026.687]C[+57.021]TSPFSYK.N	HexNAc(2)Hex(10)	C[+57]*2, N[+2027]	1316.16	3	3946.48	3946.48	0	0.5	205	Specific	284.86	279.27	279.27	4.36	24	>sp|P05556|ITB1_HUMAN Integrin beta-1 OS=Homo sapiens OX=9606 GN=ITGB1 PE=1 SV=2	3061	20210911_zy_cell_ethcd_1.2981.2981.3	controllerType=0 controllerNumber=1 scan=2981	13.8687
02718:3	66	R.YVQN[+2350.830]GTYTVK.I	HexNAc(4)Hex(5)Fuc(1)NeuAc(2)	N[+2351]	1175.15	3	3523.42	3523.43	0	-0.4	459	Specific	285.39	122.09	122.09	4.31	4	>sp|Q14126|DSG2_HUMAN Desmoglein-2 OS=Homo sapiens OX=9606 GN=DSG2 PE=1 SV=2	1442	20210911_zy_cell_ethcd_1.2995.2995.3	controllerType=0 controllerNumber=1 scan=2995	13.9279
02464:3	4	R.THN[+1378.476]LTDLSPHLR.Y	HexNAc(2)Hex(6)	N[+1378]	928.077	3	2782.22	2782.21	0	0.7	977	Specific	286.81	139.19	139.19	4.99	23	>sp|P32004|L1CAM_HUMAN Neural cell adhesion molecule L1 OS=Homo sapiens OX=9606 GN=L1CAM PE=1 SV=2	3537	20210911_zy_cell_ethcd_1.2716.2716.4	controllerType=0 controllerNumber=1 scan=2716	12.6648
00723:3	4	R.VTYQNHN[+1913.677]K.T	HexNAc(4)Hex(5)NeuAc(1)	N[+1914]	973.062	3	2917.17	2917.17	0	-0.9	288	Specific	286.81	58.43	58.43	5.09	23	>sp|P32004|L1CAM_HUMAN Neural cell adhesion molecule L1 OS=Homo sapiens OX=9606 GN=L1CAM PE=1 SV=2	3537	20210911_zy_cell_ethcd_1.803.803.3	controllerType=0 controllerNumber=1 scan=803	3.8418
00783:3	13	K.DSC[+57.021]ESNHN[+1864.634]ITC[+57.021]K.V	HexNAc(2)Hex(9)	C[+57]*2, N[+1865]	1110.41	3	3329.22	3329.22	0	-0.8	876	Specific	288.96	220.56	220.56	5.66	11	>sp|P56199|ITA1_HUMAN Integrin alpha-1 OS=Homo sapiens OX=9606 GN=ITGA1 PE=1 SV=2	9701	20210911_zy_cell_ethcd_1.869.869.3	controllerType=0 controllerNumber=1 scan=869	4.1443
03995:2	44	R.N[+1702.581]VSTNVFFK.Q	HexNAc(2)Hex(8)	N[+1703]	1379.57	2	2758.13	2758.13	0	0.6	337	Specific	289.44	210.24	210.24	4.94	8	>sp|Q6YHK3|CD109_HUMAN CD109 antigen OS=Homo sapiens OX=9606 GN=CD109 PE=1 SV=2	8627	20210911_zy_cell_ethcd_1.4397.4397.2	controllerType=0 controllerNumber=1 scan=4397	20.3093
01037:3	7	R.TLSRPSETC[+57.021]N[+1702.581]ETTK.L	HexNAc(2)Hex(8)	C[+57], N[+1703]	1109.45	3	3326.34	3326.35	0	-0.4	384	Specific	289.59	202.14	202.14	5.64	10	>sp|Q96AY3|FKB10_HUMAN Peptidyl-prolyl cis-trans isomerase FKBP10 OS=Homo sapiens OX=9606 GN=FKBP10 PE=1 SV=1	19614	20210911_zy_cell_ethcd_1.1149.1149.3	controllerType=0 controllerNumber=1 scan=1149	5.4706
00861:3	22	R.GN[+2424.867]VTQHVQGHR.N	HexNAc(5)Hex(6)Fuc(1)NeuAc(1)	N[+2425]	1219.83	3	3657.49	3657.49	0	-0.9	76	Specific	290.02	104.32	104.32	5.33	6	>sp|Q15043|S39AE_HUMAN Zinc transporter ZIP14 OS=Homo sapiens OX=9606 GN=SLC39A14 PE=1 SV=3	16204	20210911_zy_cell_ethcd_1.955.955.3	controllerType=0 controllerNumber=1 scan=955	4.552
03258:2	86	R.NYFLVN[+1702.581]GTSR.E	HexNAc(2)Hex(8)	N[+1703]	1437.09	2	2873.17	2873.17	0	-0.3	190	Specific	291.72	147.84	147.84	5.44	1	>sp|P15509|CSF2R_HUMAN Granulocyte-macrophage colony-stimulating factor receptor subunit alpha OS=Homo sapiens OX=9606 GN=CSF2RA PE=1 SV=1	5252	20210911_zy_cell_ethcd_1.3588.3588.2	controllerType=0 controllerNumber=1 scan=3588	16.6396
02236:3	5	K.NN[+3081.095]HTASILDR.M	HexNAc(6)Hex(7)Fuc(1)NeuAc(2)	N[+3081]	1407.9	3	4221.68	4221.67	0	1.9	129	Specific	292.66	69.08	69.08	4.36	17	>sp|P08962|CD63_HUMAN CD63 antigen OS=Homo sapiens OX=9606 GN=CD63 PE=1 SV=2	5151	20210911_zy_cell_ethcd_1.2465.2465.3	controllerType=0 controllerNumber=1 scan=2465	11.5143
02198:2	1	R.LLNINPN[+1702.581]K.T	HexNAc(2)Hex(8)	N[+1703]	1314.57	2	2628.13	2628.13	0	-0.1	255	Specific	292.71	154.15	154.15	5.44	48	>sp|P11279|LAMP1_HUMAN Lysosome-associated membrane glycoprotein 1 OS=Homo sapiens OX=9606 GN=LAMP1 PE=1 SV=3	4405	20210911_zy_cell_ethcd_1.2424.2424.2	controllerType=0 controllerNumber=1 scan=2424	11.3205
04357:4	83	R.FTFTSHTPGDHQIC[+57.021]LHSN[+2350.830]STR.M	HexNAc(4)Hex(5)Fuc(1)NeuAc(2)	C[+57], N[+2351]	1199.24	4	4793.95	4793.95	0	-0.2	100	Specific	294.17	209.17	209.17	5.51	1	>sp|Q7Z7H5|TMED4_HUMAN Transmembrane emp24 domain-containing protein 4 OS=Homo sapiens OX=9606 GN=TMED4 PE=1 SV=1	14145	20210911_zy_cell_ethcd_1.4795.4795.4	controllerType=0 controllerNumber=1 scan=4795	22.132
04299:3	37	K.VPLQSAHLYYN[+1864.634]VTEK.V	HexNAc(2)Hex(9)	N[+1865]	1209.52	3	3626.55	3626.55	0	0	530	Specific	295.7	179.14	179.14	5.64	5	>sp|Q32P28|P3H1_HUMAN Prolyl 3-hydroxylase 1 OS=Homo sapiens OX=9606 GN=P3H1 PE=1 SV=2	15467	20210911_zy_cell_ethcd_1.4731.4731.3	controllerType=0 controllerNumber=1 scan=4731	21.8361
01947:3	14	K.KWGHN[+1378.476]ITEFQQR.F	HexNAc(2)Hex(6)	N[+1378]	974.753	3	2922.25	2922.25	0	-2.2	276	Specific	299.01	195.38	195.38	5.32	7	>sp|Q96HE7|ERO1A_HUMAN ERO1-like protein alpha OS=Homo sapiens OX=9606 GN=ERO1A PE=1 SV=2	2944	20210911_zy_cell_ethcd_1.2149.2149.3	controllerType=0 controllerNumber=1 scan=2149	10.0876
00781:3	13	K.DSC[+57.021]ESNHN[+1702.581]ITC[+57.021]K.V	HexNAc(2)Hex(8)	C[+57]*2, N[+1703]	1056.39	3	3167.16	3167.17	0	-0.7	876	Specific	299.31	295.7	295.7	5.71	11	>sp|P56199|ITA1_HUMAN Integrin alpha-1 OS=Homo sapiens OX=9606 GN=ITGA1 PE=1 SV=2	9701	20210911_zy_cell_ethcd_1.867.867.3	controllerType=0 controllerNumber=1 scan=867	4.1363
01275:3	12	K.MN[+1864.634]FTGGDTC[+57.021]HK.V	HexNAc(2)Hex(9)	C[+57], N[+1865]	1044.72	3	3132.15	3132.15	0	-1.1	1311	Specific	300.47	201.4	201.4	5.52	15	>sp|P11717|MPRI_HUMAN Cation-independent mannose-6-phosphate receptor OS=Homo sapiens OX=9606 GN=IGF2R PE=1 SV=3	12317	20210911_zy_cell_ethcd_1.1411.1411.3	controllerType=0 controllerNumber=1 scan=1411	6.7119
01815:3	5	K.NN[+2424.867]HTASILDR.M	HexNAc(5)Hex(6)Fuc(1)NeuAc(1)	N[+2425]	1189.15	3	3565.44	3565.44	0	-0.9	129	Specific	300.54	123.28	123.28	5.44	17	>sp|P08962|CD63_HUMAN CD63 antigen OS=Homo sapiens OX=9606 GN=CD63 PE=1 SV=2	5151	20210911_zy_cell_ethcd_1.2004.2004.3	controllerType=0 controllerNumber=1 scan=2004	9.44
02239:3	4	K.VPGN[+2350.830]QTSTTLK.L	HexNAc(4)Hex(5)Fuc(1)NeuAc(2)	N[+2351]	1166.15	3	3496.44	3496.45	0	-0.8	668	Specific	300.68	106.86	106.86	4.31	23	>sp|P32004|L1CAM_HUMAN Neural cell adhesion molecule L1 OS=Homo sapiens OX=9606 GN=L1CAM PE=1 SV=2	3537	20210911_zy_cell_ethcd_1.2469.2469.3	controllerType=0 controllerNumber=1 scan=2469	11.5298
02215:2	3	R.VQPFN[+1702.581]VTQGK.Y	HexNAc(2)Hex(8)	N[+1703]	1410.59	2	2820.18	2820.18	0	0.1	352	Specific	300.76	129.08	129.08	5.44	23	>sp|P13473|LAMP2_HUMAN Lysosome-associated membrane glycoprotein 2 OS=Homo sapiens OX=9606 GN=LAMP2 PE=1 SV=2	6694	20210911_zy_cell_ethcd_1.2442.2442.2	controllerType=0 controllerNumber=1 scan=2442	11.407
04319:3	37	K.VPLQSAHLYYN[+1702.581]VTEK.V	HexNAc(2)Hex(8)	N[+1703]	1155.5	3	3464.5	3464.5	0	-0.8	530	Specific	300.82	199.31	199.31	5.06	5	>sp|Q32P28|P3H1_HUMAN Prolyl 3-hydroxylase 1 OS=Homo sapiens OX=9606 GN=P3H1 PE=1 SV=2	15467	20210911_zy_cell_ethcd_1.4753.4753.3	controllerType=0 controllerNumber=1 scan=4753	21.9391
05527:3	34	K.GELN[+1540.529]TSIFSSRPIDK.F	HexNAc(2)Hex(7)	N[+1541]	1068.8	3	3204.39	3204.39	0	-1.4	350	Specific	303.2	181.97	181.97	5.06	6	>sp|Q9UHG3|PCYOX_HUMAN Prenylcysteine oxidase 1 OS=Homo sapiens OX=9606 GN=PCYOX1 PE=1 SV=3	9384	20210911_zy_cell_ethcd_1.6081.6081.3	controllerType=0 controllerNumber=1 scan=6081	27.9262
01008:3	22	R.GN[+2350.830]VTQHVQGHR.N	HexNAc(4)Hex(5)Fuc(1)NeuAc(2)	N[+2351]	1195.15	3	3583.45	3583.45	0	-1.4	76	Specific	303.21	120.75	120.75	5.33	6	>sp|Q15043|S39AE_HUMAN Zinc transporter ZIP14 OS=Homo sapiens OX=9606 GN=SLC39A14 PE=1 SV=3	16204	20210911_zy_cell_ethcd_1.1117.1117.3	controllerType=0 controllerNumber=1 scan=1117	5.3204
03086:3	1	R.GHTLTLN[+1581.555]FTR.N	HexNAc(3)Hex(6)	N[+1582]	914.396	3	2741.17	2741.18	0	-1	97	Specific	303.91	181.17	181.17	5.52	48	>sp|P11279|LAMP1_HUMAN Lysosome-associated membrane glycoprotein 1 OS=Homo sapiens OX=9606 GN=LAMP1 PE=1 SV=3	4405	20210911_zy_cell_ethcd_1.3399.3399.3	controllerType=0 controllerNumber=1 scan=3399	15.7679
02612:3	3	K.VASVININPN[+1702.581]TTHSTGSC[+57.021]R.S	HexNAc(2)Hex(8)	C[+57], N[+1703]	1244.19	3	3730.57	3730.57	0	-1.8	248	Specific	304.13	241.54	241.54	6.06	23	>sp|P13473|LAMP2_HUMAN Lysosome-associated membrane glycoprotein 2 OS=Homo sapiens OX=9606 GN=LAMP2 PE=1 SV=2	6694	20210911_zy_cell_ethcd_1.2878.2878.3	controllerType=0 controllerNumber=1 scan=2878	13.4061
06471:3	63	R.HLYTTTGGETDFTN[+2026.687]VTSLR.G	HexNAc(2)Hex(10)	N[+2027]	1380.58	3	4139.71	4139.71	0	1.2	393	Specific	306.33	269.71	269.71	5.37	2	>sp|Q99523|SORT_HUMAN Sortilin OS=Homo sapiens OX=9606 GN=SORT1 PE=1 SV=3	15998	20210911_zy_cell_ethcd_1.7123.7123.3	controllerType=0 controllerNumber=1 scan=7123	32.6059
05698:3	2	R.NPC[+57.021]TSEQN[+2350.830]C[+57.021]TSPFSYK.N	HexNAc(4)Hex(5)Fuc(1)NeuAc(2)	C[+57]*2, N[+2351]	1424.21	3	4270.62	4270.62	0	-0.6	205	Specific	309.43	181.94	181.94	4.98	24	>sp|P05556|ITB1_HUMAN Integrin beta-1 OS=Homo sapiens OX=9606 GN=ITGB1 PE=1 SV=2	3061	20210911_zy_cell_ethcd_1.6270.6270.3	controllerType=0 controllerNumber=1 scan=6270	28.772
01925:3	14	K.KWGHN[+1864.634]ITEFQQR.F	HexNAc(2)Hex(9)	N[+1865]	1136.81	3	3408.41	3408.41	0	1.1	276	Specific	310.12	194.48	194.48	5.06	7	>sp|Q96HE7|ERO1A_HUMAN ERO1-like protein alpha OS=Homo sapiens OX=9606 GN=ERO1A PE=1 SV=2	2944	20210911_zy_cell_ethcd_1.2125.2125.3	controllerType=0 controllerNumber=1 scan=2125	9.9808
02214:2	62	K.EN[+1702.581]ATTDLLTK.L	HexNAc(2)Hex(8)	N[+1703]	1404.58	2	2808.15	2808.15	0	-0.2	264	Specific	311.6	182.71	182.71	5.52	2	>sp|P28799|GRN_HUMAN Progranulin OS=Homo sapiens OX=9606 GN=GRN PE=1 SV=2	9918	20210911_zy_cell_ethcd_1.2441.2441.2	controllerType=0 controllerNumber=1 scan=2441	11.4016
02768:3	2	K.LRNPC[+57.021]TSEQN[+1702.581]C[+57.021]TSPFSYK.N	HexNAc(2)Hex(8)	C[+57]*2, N[+1703]	1297.86	3	3891.55	3891.56	0	-0.5	203	Specific	311.81	263.07	263.07	5.75	24	>sp|P05556|ITB1_HUMAN Integrin beta-1 OS=Homo sapiens OX=9606 GN=ITGB1 PE=1 SV=2	3061	20210911_zy_cell_ethcd_1.3050.3050.3	controllerType=0 controllerNumber=1 scan=3050	14.1791
03499:3	3	K.VASVININPN[+2424.867]TTHSTGSC[+57.021]R.S	HexNAc(5)Hex(6)Fuc(1)NeuAc(1)	C[+57], N[+2425]	1484.96	3	4452.86	4452.86	0	0	248	Specific	313.23	182.19	182.19	6.03	23	>sp|P13473|LAMP2_HUMAN Lysosome-associated membrane glycoprotein 2 OS=Homo sapiens OX=9606 GN=LAMP2 PE=1 SV=2	6694	20210911_zy_cell_ethcd_1.3853.3853.3	controllerType=0 controllerNumber=1 scan=3853	17.849
03007:3	1	R.GHTLTLN[+1864.634]FTR.N	HexNAc(2)Hex(9)	N[+1865]	1008.76	3	3024.25	3024.26	0	-1.6	97	Specific	314.01	182.87	182.87	5.52	48	>sp|P11279|LAMP1_HUMAN Lysosome-associated membrane glycoprotein 1 OS=Homo sapiens OX=9606 GN=LAMP1 PE=1 SV=3	4405	20210911_zy_cell_ethcd_1.3312.3312.3	controllerType=0 controllerNumber=1 scan=3312	15.3766
03001:3	2	K.KDTC[+57.021]TQEC[+57.021]SYFN[+1702.581]ITK.V	HexNAc(2)Hex(8)	C[+57]*2, N[+1703]	1199.81	3	3597.41	3597.41	0	-0.3	658	Specific	315.38	228.75	228.75	5.66	24	>sp|P05556|ITB1_HUMAN Integrin beta-1 OS=Homo sapiens OX=9606 GN=ITGB1 PE=1 SV=2	3061	20210911_zy_cell_ethcd_1.3305.3305.3	controllerType=0 controllerNumber=1 scan=3305	15.3467
03023:4	8	R.IAPASN[+1540.529]VSHTVVLRPLK.A	HexNAc(2)Hex(7)	N[+1541]	836.404	4	3342.59	3342.59	0	0.5	83	Specific	316	282.83	282.83	5.25	8	>sp|P43308|SSRB_HUMAN Translocon-associated protein subunit beta OS=Homo sapiens OX=9606 GN=SSR2 PE=1 SV=1	13071	20210911_zy_cell_ethcd_1.3329.3329.4	controllerType=0 controllerNumber=1 scan=3329	15.4555
01703:3	73	R.AN[+1378.476]HSGAVVLLK.R	HexNAc(2)Hex(6)	N[+1378]	829.712	3	2487.12	2487.12	0	-0.9	322	Specific	318.07	198.97	198.97	5.52	3	>sp|P23229|ITA6_HUMAN Integrin alpha-6 OS=Homo sapiens OX=9606 GN=ITGA6 PE=1 SV=5	4737	20210911_zy_cell_ethcd_1.1881.1881.3	controllerType=0 controllerNumber=1 scan=1881	8.8759
01967:2	36	R.TVN[+1540.529]VSVPK.K	HexNAc(2)Hex(7)	N[+1541]	1192.51	2	2384.02	2384.02	0	-0.9	89	Specific	319.54	165.23	165.23	5.52	4	>sp|Q96KA5|CLP1L_HUMAN Cleft lip and palate transmembrane protein 1-like protein OS=Homo sapiens OX=9606 GN=CLPTM1L PE=1 SV=1	1199	20210911_zy_cell_ethcd_1.2171.2171.2	controllerType=0 controllerNumber=1 scan=2171	10.1849
03046:3	2	K.KDTC[+57.021]TQEC[+57.021]SYFN[+1378.476]ITK.V	HexNAc(2)Hex(6)	C[+57]*2, N[+1378]	1091.77	3	3273.3	3273.31	0	-0.7	658	Specific	323.2	223.17	223.17	5.77	24	>sp|P05556|ITB1_HUMAN Integrin beta-1 OS=Homo sapiens OX=9606 GN=ITGB1 PE=1 SV=2	3061	20210911_zy_cell_ethcd_1.3355.3355.3	controllerType=0 controllerNumber=1 scan=3355	15.5698
03010:3	8	R.IAPASN[+2026.687]VSHTVVLRPLK.A	HexNAc(2)Hex(10)	N[+2027]	1276.92	3	3828.75	3828.75	0	-0.1	83	Specific	323.6	323.6	323.6	6.16	8	>sp|P43308|SSRB_HUMAN Translocon-associated protein subunit beta OS=Homo sapiens OX=9606 GN=SSR2 PE=1 SV=1	13071	20210911_zy_cell_ethcd_1.3315.3315.3	controllerType=0 controllerNumber=1 scan=3315	15.3902
00833:3	22	R.GN[+2059.735]VTQHVQGHR.N	HexNAc(4)Hex(5)Fuc(1)NeuAc(1)	N[+2060]	1098.12	3	3292.36	3292.36	0	-0.7	76	Specific	323.73	123.46	123.46	5.58	6	>sp|Q15043|S39AE_HUMAN Zinc transporter ZIP14 OS=Homo sapiens OX=9606 GN=SLC39A14 PE=1 SV=3	16204	20210911_zy_cell_ethcd_1.924.924.3	controllerType=0 controllerNumber=1 scan=924	4.4024
02995:3	2	K.KDTC[+57.021]TQEC[+57.021]SYFN[+1864.634]ITK.V	HexNAc(2)Hex(9)	C[+57]*2, N[+1865]	1253.83	3	3759.46	3759.47	0	-0.7	658	Specific	323.76	247.09	247.09	5.7	24	>sp|P05556|ITB1_HUMAN Integrin beta-1 OS=Homo sapiens OX=9606 GN=ITGB1 PE=1 SV=2	3061	20210911_zy_cell_ethcd_1.3299.3299.3	controllerType=0 controllerNumber=1 scan=3299	15.315
01957:2	36	R.TVN[+1702.581]VSVPK.K	HexNAc(2)Hex(8)	N[+1703]	1273.54	2	2546.07	2546.07	0	-0.1	89	Specific	324.35	229.68	229.68	5.65	4	>sp|Q96KA5|CLP1L_HUMAN Cleft lip and palate transmembrane protein 1-like protein OS=Homo sapiens OX=9606 GN=CLPTM1L PE=1 SV=1	1199	20210911_zy_cell_ethcd_1.2160.2160.2	controllerType=0 controllerNumber=1 scan=2160	10.1343
02093:3	13	R.SEN[+1864.634]ASLVLSSSNQK.R	HexNAc(2)Hex(9)	N[+1865]	1110.13	3	3328.37	3328.37	0	-0.6	1111	Specific	325.35	233.23	233.23	4.73	11	>sp|P56199|ITA1_HUMAN Integrin alpha-1 OS=Homo sapiens OX=9606 GN=ITGA1 PE=1 SV=2	9701	20210911_zy_cell_ethcd_1.2309.2309.3	controllerType=0 controllerNumber=1 scan=2309	10.81
01267:3	12	K.MN[+1702.581]FTGGDTC[+57.021]HK.V	HexNAc(2)Hex(8)	C[+57], N[+1703]	990.704	3	2970.1	2970.1	0	-1.2	1311	Specific	325.87	218.17	218.17	5.65	15	>sp|P11717|MPRI_HUMAN Cation-independent mannose-6-phosphate receptor OS=Homo sapiens OX=9606 GN=IGF2R PE=1 SV=3	12317	20210911_zy_cell_ethcd_1.1402.1402.3	controllerType=0 controllerNumber=1 scan=1402	6.6715
03006:2	11	R.VFGSQN[+1864.634]LTTVK.L	HexNAc(2)Hex(9)	N[+1865]	1529.65	2	3058.29	3058.29	0	0.5	510	Specific	328.71	181.55	181.55	5.02	14	>sp|Q9Y4L1|HYOU1_HUMAN Hypoxia up-regulated protein 1 OS=Homo sapiens OX=9606 GN=HYOU1 PE=1 SV=1	14756	20210911_zy_cell_ethcd_1.3311.3311.2	controllerType=0 controllerNumber=1 scan=3311	15.3711
01651:3	29	K.EQYIHEN[+1378.476]YSR.A	HexNAc(2)Hex(6)	N[+1378]	906.365	3	2717.08	2717.08	0	-1.1	542	Specific	329.97	198.15	198.15	5.63	4	>sp|O60568|PLOD3_HUMAN Multifunctional procollagen lysine hydroxylase and glycosyltransferase LH3 OS=Homo sapiens OX=9606 GN=PLOD3 PE=1 SV=1	10856	20210911_zy_cell_ethcd_1.1824.1824.3	controllerType=0 controllerNumber=1 scan=1824	8.6107
02809:3	77	R.VTGLN[+2350.830]C[+57.021]TTNHPINPK.G	HexNAc(4)Hex(5)Fuc(1)NeuAc(2)	C[+57], N[+2351]	1339.56	3	4016.67	4016.67	0	-0.3	864	Specific	330.08	130.48	130.48	5.67	1	>sp|P08648|ITA5_HUMAN Integrin alpha-5 OS=Homo sapiens OX=9606 GN=ITGA5 PE=1 SV=2	11180	20210911_zy_cell_ethcd_1.3095.3095.3	controllerType=0 controllerNumber=1 scan=3095	14.3849
01458:3	5	K.NN[+1768.640]HTASILDR.M	HexNAc(4)Hex(5)Fuc(1)	N[+1769]	970.409	3	2909.21	2909.22	0	-0.8	129	Specific	330.95	183.21	183.21	5.63	17	>sp|P08962|CD63_HUMAN CD63 antigen OS=Homo sapiens OX=9606 GN=CD63 PE=1 SV=2	5151	20210911_zy_cell_ethcd_1.1612.1612.3	controllerType=0 controllerNumber=1 scan=1612	7.6369
05480:3	34	K.GELN[+1702.581]TSIFSSRPIDK.F	HexNAc(2)Hex(8)	N[+1703]	1122.82	3	3366.44	3366.45	0	-1.1	350	Specific	333.3	205.44	205.44	5.53	6	>sp|Q9UHG3|PCYOX_HUMAN Prenylcysteine oxidase 1 OS=Homo sapiens OX=9606 GN=PCYOX1 PE=1 SV=3	9384	20210911_zy_cell_ethcd_1.6029.6029.3	controllerType=0 controllerNumber=1 scan=6029	27.6937
01905:3	32	K.HTNMN[+1702.581]LTQLK.V	HexNAc(2)Hex(8)	N[+1703]	968.072	3	2902.2	2902.2	0	-0.3	250	Specific	334.36	183.12	183.12	5.63	6	>sp|Q15165|PON2_HUMAN Serum paraoxonase/arylesterase 2 OS=Homo sapiens OX=9606 GN=PON2 PE=1 SV=4	9244	20210911_zy_cell_ethcd_1.2103.2103.3	controllerType=0 controllerNumber=1 scan=2103	9.8824
01729:2	18	R.YN[+1702.581]C[+57.021]SIESPR.K	HexNAc(2)Hex(8)	C[+57], N[+1703]	1414.54	2	2828.08	2828.08	0	-0.2	695	Specific	334.96	194.05	194.05	5.63	7	>sp|O00469|PLOD2_HUMAN Procollagen-lysine,2-oxoglutarate 5-dioxygenase 2 OS=Homo sapiens OX=9606 GN=PLOD2 PE=1 SV=2	15649	20210911_zy_cell_ethcd_1.1909.1909.2	controllerType=0 controllerNumber=1 scan=1909	9.0021
02734:3	2	K.LRNPC[+57.021]TSEQN[+1540.529]C[+57.021]TSPFSYK.N	HexNAc(2)Hex(7)	C[+57]*2, N[+1541]	1243.84	3	3729.5	3729.5	0	-0.4	203	Specific	335.2	282.52	282.52	5.99	24	>sp|P05556|ITB1_HUMAN Integrin beta-1 OS=Homo sapiens OX=9606 GN=ITGB1 PE=1 SV=2	3061	20210911_zy_cell_ethcd_1.3012.3012.3	controllerType=0 controllerNumber=1 scan=3012	14.0076
01245:2	49	K.N[+1864.634]YTADYDK.A	HexNAc(2)Hex(9)	N[+1865]	1427.53	2	2854.06	2854.06	0	0	106	Specific	335.79	251.43	251.43	5.58	2	>sp|O94905|ERLN2_HUMAN Erlin-2 OS=Homo sapiens OX=9606 GN=ERLIN2 PE=1 SV=1	5719	20210911_zy_cell_ethcd_1.1378.1378.2	controllerType=0 controllerNumber=1 scan=1378	6.5581
00769:3	22	R.GN[+2059.735]VTQHVQGHR.N	HexNAc(4)Hex(5)Fuc(1)NeuAc(1)	N[+2060]	1098.12	3	3292.36	3292.36	0	-0.3	76	Specific	338.8	142.75	142.75	5.58	6	>sp|Q15043|S39AE_HUMAN Zinc transporter ZIP14 OS=Homo sapiens OX=9606 GN=SLC39A14 PE=1 SV=3	16204	20210911_zy_cell_ethcd_1.854.854.3	controllerType=0 controllerNumber=1 scan=854	4.08
02722:3	23	K.GLN[+1864.634]LTEDTYKPR.I	HexNAc(2)Hex(9)	N[+1865]	1091.12	3	3271.36	3271.36	0	-1.2	396	Specific	339.4	197.55	197.55	5.75	6	>sp|Q08380|LG3BP_HUMAN Galectin-3-binding protein OS=Homo sapiens OX=9606 GN=LGALS3BP PE=1 SV=1	4876	20210911_zy_cell_ethcd_1.2999.2999.3	controllerType=0 controllerNumber=1 scan=2999	13.9465
01691:2	25	K.N[+1378.476]QSVPLSC[+57.021]C[+57.021]R.E	HexNAc(2)Hex(6)	C[+57]*2, N[+1378]	1300.02	2	2599.02	2599.03	0	-0.7	167	Specific	340.52	248.51	248.51	5.58	5	>sp|O60637|TSN3_HUMAN Tetraspanin-3 OS=Homo sapiens OX=9606 GN=TSPAN3 PE=2 SV=1	16532	20210911_zy_cell_ethcd_1.1868.1868.2	controllerType=0 controllerNumber=1 scan=1868	8.8164
02503:2	71	R.FINYN[+1864.634]QTVSR.M	HexNAc(2)Hex(9)	N[+1865]	1553.63	2	3106.26	3106.26	0	-0.3	909	Specific	340.79	174.99	174.99	5.63	2	>sp|Q8N766|EMC1_HUMAN ER membrane protein complex subunit 1 OS=Homo sapiens OX=9606 GN=EMC1 PE=1 SV=1	4991	20210911_zy_cell_ethcd_1.2759.2759.2	controllerType=0 controllerNumber=1 scan=2759	12.8597
01247:3	5	K.NN[+1864.634]HTASILDR.M	HexNAc(2)Hex(9)	N[+1865]	1002.41	3	3005.21	3005.21	0	-1	129	Specific	341.62	210.38	210.38	5.65	17	>sp|P08962|CD63_HUMAN CD63 antigen OS=Homo sapiens OX=9606 GN=CD63 PE=1 SV=2	5151	20210911_zy_cell_ethcd_1.1380.1380.3	controllerType=0 controllerNumber=1 scan=1380	6.5687
03897:3	35	K.GRDIYTFDGALN[+1540.529]K.S	HexNAc(2)Hex(7)	N[+1541]	1004.09	3	3010.26	3010.27	0	-1.5	62	Specific	344.75	257.6	257.6	5.47	4	>sp|Q08722|CD47_HUMAN Leukocyte surface antigen CD47 OS=Homo sapiens OX=9606 GN=CD47 PE=1 SV=1	886	20210911_zy_cell_ethcd_1.4289.4289.3	controllerType=0 controllerNumber=1 scan=4289	19.8168
01741:2	13	R.N[+1702.581]TTFNVESTK.K	HexNAc(2)Hex(8)	N[+1703]	1422.07	2	2843.13	2843.13	0	-0.5	418	Specific	345.46	234.7	234.7	5.65	11	>sp|P56199|ITA1_HUMAN Integrin alpha-1 OS=Homo sapiens OX=9606 GN=ITGA1 PE=1 SV=2	9701	20210911_zy_cell_ethcd_1.1923.1923.2	controllerType=0 controllerNumber=1 scan=1923	9.0657
02730:3	2	R.NPC[+57.021]TSEQN[+1540.529]C[+57.021]TSPFSYK.N	HexNAc(2)Hex(7)	C[+57]*2, N[+1541]	1154.11	3	3460.32	3460.32	0	-0.6	205	Specific	345.48	319.52	319.52	5.16	24	>sp|P05556|ITB1_HUMAN Integrin beta-1 OS=Homo sapiens OX=9606 GN=ITGB1 PE=1 SV=2	3061	20210911_zy_cell_ethcd_1.3008.3008.3	controllerType=0 controllerNumber=1 scan=3008	13.9888
03257:3	4	R.THN[+1913.677]LTDLSPHLR.Y	HexNAc(4)Hex(5)NeuAc(1)	N[+1914]	1106.48	3	3317.41	3317.42	0	-1.3	977	Specific	345.88	143.88	143.88	5.7	23	>sp|P32004|L1CAM_HUMAN Neural cell adhesion molecule L1 OS=Homo sapiens OX=9606 GN=L1CAM PE=1 SV=2	3537	20210911_zy_cell_ethcd_1.3587.3587.3	controllerType=0 controllerNumber=1 scan=3587	16.6346
02338:3	28	R.VTPAC[+57.021]N[+2059.735]TSLPAQR.W	HexNAc(4)Hex(5)Fuc(1)NeuAc(1)	C[+57], N[+2060]	1158.82	3	3474.44	3474.45	0	-0.9	64	Specific	347.17	158.12	158.12	4.63	11	>sp|Q9UBG0|MRC2_HUMAN C-type mannose receptor 2 OS=Homo sapiens OX=9606 GN=MRC2 PE=1 SV=2	16756	20210911_zy_cell_ethcd_1.2578.2578.3	controllerType=0 controllerNumber=1 scan=2578	12.0349
01731:3	6	K.PIN[+1540.529]TTGTLKPDDR.V	HexNAc(2)Hex(7)	N[+1541]	990.096	3	2968.27	2968.28	0	-1.2	262	Specific	347.62	205.6	205.6	5.77	12	>sp|Q92542|NICA_HUMAN Nicastrin OS=Homo sapiens OX=9606 GN=NCSTN PE=1 SV=2	7240	20210911_zy_cell_ethcd_1.1912.1912.3	controllerType=0 controllerNumber=1 scan=1912	9.0135
03709:3	56	R.GN[+2350.830]ITEYQC[+57.021]HQYITK.M	HexNAc(4)Hex(5)Fuc(1)NeuAc(2)	C[+57], N[+2351]	1369.22	3	4105.65	4105.65	0	-0.4	209	Specific	349.68	175.39	175.39	5.75	2	>sp|Q92896|GSLG1_HUMAN Golgi apparatus protein 1 OS=Homo sapiens OX=9606 GN=GLG1 PE=1 SV=2	13270	20210911_zy_cell_ethcd_1.4083.4083.3	controllerType=0 controllerNumber=1 scan=4083	18.8791
01735:2	18	R.YN[+1540.529]C[+57.021]SIESPR.K	HexNAc(2)Hex(7)	C[+57], N[+1541]	1333.52	2	2666.03	2666.03	0	0.2	695	Specific	349.92	201.19	201.19	5.63	7	>sp|O00469|PLOD2_HUMAN Procollagen-lysine,2-oxoglutarate 5-dioxygenase 2 OS=Homo sapiens OX=9606 GN=PLOD2 PE=1 SV=2	15649	20210911_zy_cell_ethcd_1.1916.1916.2	controllerType=0 controllerNumber=1 scan=1916	9.0314
00754:3	1	R.KDN[+2059.735]TTVTR.L	HexNAc(4)Hex(5)Fuc(1)NeuAc(1)	N[+2060]	998.748	3	2994.23	2994.23	0	-0.5	247	Specific	350.11	147.65	147.65	5.55	48	>sp|P11279|LAMP1_HUMAN Lysosome-associated membrane glycoprotein 1 OS=Homo sapiens OX=9606 GN=LAMP1 PE=1 SV=3	4405	20210911_zy_cell_ethcd_1.837.837.3	controllerType=0 controllerNumber=1 scan=837	4.0022
02762:3	2	K.LRNPC[+57.021]TSEQN[+1378.476]C[+57.021]TSPFSYK.N	HexNAc(2)Hex(6)	C[+57]*2, N[+1378]	1189.82	3	3567.44	3567.45	0	-2.2	203	Specific	354.38	317.36	317.36	5.63	24	>sp|P05556|ITB1_HUMAN Integrin beta-1 OS=Homo sapiens OX=9606 GN=ITGB1 PE=1 SV=2	3061	20210911_zy_cell_ethcd_1.3043.3043.3	controllerType=0 controllerNumber=1 scan=3043	14.1481
01453:3	79	R.KTN[+2350.830]ESVSEPR.K	HexNAc(4)Hex(5)Fuc(1)NeuAc(2)	N[+2351]	1166.47	3	3497.4	3497.41	0	-1.3	239	Specific	355.09	195.87	195.87	5.63	1	>sp|Q13433|S39A6_HUMAN Zinc transporter ZIP6 OS=Homo sapiens OX=9606 GN=SLC39A6 PE=1 SV=3	14956	20210911_zy_cell_ethcd_1.1606.1606.3	controllerType=0 controllerNumber=1 scan=1606	7.611
02749:3	6	R.N[+1864.634]ISGVVLADHSGAFHNK.Y	HexNAc(2)Hex(9)	N[+1865]	1210.85	3	3630.53	3630.53	0	-1	435	Specific	355.85	205.34	205.34	6.2	12	>sp|Q92542|NICA_HUMAN Nicastrin OS=Homo sapiens OX=9606 GN=NCSTN PE=1 SV=2	7240	20210911_zy_cell_ethcd_1.3029.3029.3	controllerType=0 controllerNumber=1 scan=3029	14.0833
01878:3	54	K.YHVLHIN[+1872.651]TTK.N	HexNAc(3)Hex(6)NeuAc(1)	N[+1873]	1033.44	3	3098.32	3098.32	0	-0.3	102	Specific	356.3	176.64	176.64	5.66	3	>sp|Q7LGA3|HS2ST_HUMAN Heparan sulfate 2-O-sulfotransferase 1 OS=Homo sapiens OX=9606 GN=HS2ST1 PE=1 SV=1	4219	20210911_zy_cell_ethcd_1.2073.2073.3	controllerType=0 controllerNumber=1 scan=2073	9.7504
02744:3	2	K.LRNPC[+57.021]TSEQN[+1702.581]C[+57.021]TSPFSYK.N	HexNAc(2)Hex(8)	C[+57]*2, N[+1703]	1297.86	3	3891.55	3891.56	0	-0.6	203	Specific	358.01	310.1	310.1	5.99	24	>sp|P05556|ITB1_HUMAN Integrin beta-1 OS=Homo sapiens OX=9606 GN=ITGB1 PE=1 SV=2	3061	20210911_zy_cell_ethcd_1.3023.3023.3	controllerType=0 controllerNumber=1 scan=3023	14.0594
02708:3	2	R.NPC[+57.021]TSEQN[+2026.687]C[+57.021]TSPFSYK.N	HexNAc(2)Hex(10)	C[+57]*2, N[+2027]	1316.17	3	3946.49	3946.48	0	2.4	205	Specific	358.2	313.24	313.24	4.41	24	>sp|P05556|ITB1_HUMAN Integrin beta-1 OS=Homo sapiens OX=9606 GN=ITGB1 PE=1 SV=2	3061	20210911_zy_cell_ethcd_1.2984.2984.3	controllerType=0 controllerNumber=1 scan=2984	13.8791
01619:3	29	K.EQYIHEN[+1864.634]YSR.A	HexNAc(2)Hex(9)	N[+1865]	1068.42	3	3203.24	3203.24	0	-2	542	Specific	358.34	182.38	182.38	5.27	4	>sp|O60568|PLOD3_HUMAN Multifunctional procollagen lysine hydroxylase and glycosyltransferase LH3 OS=Homo sapiens OX=9606 GN=PLOD3 PE=1 SV=1	10856	20210911_zy_cell_ethcd_1.1789.1789.3	controllerType=0 controllerNumber=1 scan=1789	8.4534
02228:2	3	R.VQPFN[+1540.529]VTQGK.Y	HexNAc(2)Hex(7)	N[+1541]	1329.57	2	2658.13	2658.13	0	-0.4	352	Specific	360.31	213.49	213.49	5.65	23	>sp|P13473|LAMP2_HUMAN Lysosome-associated membrane glycoprotein 2 OS=Homo sapiens OX=9606 GN=LAMP2 PE=1 SV=2	6694	20210911_zy_cell_ethcd_1.2457.2457.2	controllerType=0 controllerNumber=1 scan=2457	11.4748
01255:3	5	K.NN[+1702.581]HTASILDR.M	HexNAc(2)Hex(8)	N[+1703]	948.389	3	2843.15	2843.16	0	-1.5	129	Specific	361.44	203.19	203.19	5.65	17	>sp|P08962|CD63_HUMAN CD63 antigen OS=Homo sapiens OX=9606 GN=CD63 PE=1 SV=2	5151	20210911_zy_cell_ethcd_1.1389.1389.3	controllerType=0 controllerNumber=1 scan=1389	6.6111
01860:3	10	R.EAGN[+1622.582]HTSGAGLVQINK.S	HexNAc(4)Hex(5)	N[+1623]	1073.47	3	3218.39	3218.4	0	-0.8	80	Specific	363.27	218.77	218.77	6.17	11	>sp|P20645|MPRD_HUMAN Cation-dependent mannose-6-phosphate receptor OS=Homo sapiens OX=9606 GN=M6PR PE=1 SV=1	11960	20210911_zy_cell_ethcd_1.2053.2053.3	controllerType=0 controllerNumber=1 scan=2053	9.6596
01178:3	7	R.YHYN[+1540.529]GTFEDGKK.F	HexNAc(2)Hex(7)	N[+1541]	1000.4	3	2999.19	2999.19	0	-0.7	67	Specific	363.4	261.31	261.31	5.5	10	>sp|Q96AY3|FKB10_HUMAN Peptidyl-prolyl cis-trans isomerase FKBP10 OS=Homo sapiens OX=9606 GN=FKBP10 PE=1 SV=1	19614	20210911_zy_cell_ethcd_1.1304.1304.3	controllerType=0 controllerNumber=1 scan=1304	6.2134
03801:3	26	R.N[+1864.634]HSIFLADINQER.G	HexNAc(2)Hex(9)	N[+1865]	1141.14	3	3421.41	3421.42	0	-1	197	Specific	363.86	247.33	247.33	5.7	5	>sp|P50897|PPT1_HUMAN Palmitoyl-protein thioesterase 1 OS=Homo sapiens OX=9606 GN=PPT1 PE=1 SV=1	7591	20210911_zy_cell_ethcd_1.4184.4184.3	controllerType=0 controllerNumber=1 scan=4184	19.3374
01427:3	5	K.NN[+2133.772]HTASILDR.M	HexNAc(5)Hex(6)Fuc(1)	N[+2134]	1092.12	3	3274.35	3274.35	0	-0.7	129	Specific	364.23	192.87	192.87	5.63	17	>sp|P08962|CD63_HUMAN CD63 antigen OS=Homo sapiens OX=9606 GN=CD63 PE=1 SV=2	5151	20210911_zy_cell_ethcd_1.1578.1578.3	controllerType=0 controllerNumber=1 scan=1578	7.4857
01347:3	33	K.SQNRPQGQSTQPSNAAGTN[+406.159]TTSASTPR.S	HexNAc(2)	N[+406]	1050.82	3	3150.45	3150.45	0	-1	104	Specific	364.57	284.91	284.91	5.69	2	>sp|Q9UHD9|UBQL2_HUMAN Ubiquilin-2 OS=Homo sapiens OX=9606 GN=UBQLN2 PE=1 SV=2	18505	20210911_zy_cell_ethcd_1.1490.1490.3	controllerType=0 controllerNumber=1 scan=1490	7.0852
02455:3	14	K.WGHN[+1540.529]ITEFQQR.F	HexNAc(2)Hex(7)	N[+1541]	986.073	3	2956.21	2956.21	0	-1.4	277	Specific	367.31	220.68	220.68	5.65	7	>sp|Q96HE7|ERO1A_HUMAN ERO1-like protein alpha OS=Homo sapiens OX=9606 GN=ERO1A PE=1 SV=2	2944	20210911_zy_cell_ethcd_1.2706.2706.3	controllerType=0 controllerNumber=1 scan=2706	12.6204
01087:3	1	R.KDN[+2715.963]TTVTR.L	HexNAc(5)Hex(6)Fuc(1)NeuAc(2)	N[+2716]	1217.49	3	3650.46	3650.46	0	-0.5	247	Specific	368.14	113.04	113.04	5.41	48	>sp|P11279|LAMP1_HUMAN Lysosome-associated membrane glycoprotein 1 OS=Homo sapiens OX=9606 GN=LAMP1 PE=1 SV=3	4405	20210911_zy_cell_ethcd_1.1204.1204.3	controllerType=0 controllerNumber=1 scan=1204	5.7355
02731:3	2	K.LRNPC[+57.021]TSEQN[+1702.581]C[+57.021]TSPFSYK.N	HexNAc(2)Hex(8)	C[+57]*2, N[+1703]	1297.86	3	3891.55	3891.56	0	-0.5	203	Specific	370.05	329.41	329.41	6.15	24	>sp|P05556|ITB1_HUMAN Integrin beta-1 OS=Homo sapiens OX=9606 GN=ITGB1 PE=1 SV=2	3061	20210911_zy_cell_ethcd_1.3009.3009.3	controllerType=0 controllerNumber=1 scan=3009	13.9934
02710:3	23	K.GLN[+2026.687]LTEDTYKPR.I	HexNAc(2)Hex(10)	N[+2027]	1145.14	3	3433.41	3433.41	0	-1.1	396	Specific	371.63	233.41	233.41	5.77	6	>sp|Q08380|LG3BP_HUMAN Galectin-3-binding protein OS=Homo sapiens OX=9606 GN=LGALS3BP PE=1 SV=1	4876	20210911_zy_cell_ethcd_1.2986.2986.3	controllerType=0 controllerNumber=1 scan=2986	13.8885
02704:3	2	K.LRNPC[+57.021]TSEQN[+1864.634]C[+57.021]TSPFSYK.N	HexNAc(2)Hex(9)	C[+57]*2, N[+1865]	1351.87	3	4053.61	4053.61	0	-0.3	203	Specific	371.7	303.49	303.49	5.99	24	>sp|P05556|ITB1_HUMAN Integrin beta-1 OS=Homo sapiens OX=9606 GN=ITGB1 PE=1 SV=2	3061	20210911_zy_cell_ethcd_1.2979.2979.3	controllerType=0 controllerNumber=1 scan=2979	13.8597
01701:3	7	R.YHYN[+1378.476]GTFEDGK.K	HexNAc(2)Hex(6)	N[+1378]	903.686	3	2709.04	2709.05	0	-1.2	67	Specific	371.82	238.51	238.51	5.65	10	>sp|Q96AY3|FKB10_HUMAN Peptidyl-prolyl cis-trans isomerase FKBP10 OS=Homo sapiens OX=9606 GN=FKBP10 PE=1 SV=1	19614	20210911_zy_cell_ethcd_1.1879.1879.3	controllerType=0 controllerNumber=1 scan=1879	8.8654
02923:3	31	R.LEN[+1540.529]ITTGTYTIHAQK.E	HexNAc(2)Hex(7)	N[+1541]	1077.47	3	3230.4	3230.41	0	-1.5	367	Specific	373.5	234.32	234.32	5.77	3	>sp|Q5JPE7|NOMO2_HUMAN Nodal modulator 2 OS=Homo sapiens OX=9606 GN=NOMO2 PE=1 SV=1	6463	20210911_zy_cell_ethcd_1.3220.3220.3	controllerType=0 controllerNumber=1 scan=3220	14.95
02417:3	4	R.THN[+1864.634]LTDLSPHLR.Y	HexNAc(2)Hex(9)	N[+1865]	1090.13	3	3268.37	3268.37	0	-2.3	977	Specific	374.67	223.81	223.81	5.45	23	>sp|P32004|L1CAM_HUMAN Neural cell adhesion molecule L1 OS=Homo sapiens OX=9606 GN=L1CAM PE=1 SV=2	3537	20210911_zy_cell_ethcd_1.2664.2664.3	controllerType=0 controllerNumber=1 scan=2664	12.4313
02379:3	8	R.IAPASN[+1864.634]VSHTVVLR.P	HexNAc(2)Hex(9)	N[+1865]	1110.16	3	3328.46	3328.47	0	-0.9	83	Specific	375.75	219.98	219.98	5.19	8	>sp|P43308|SSRB_HUMAN Translocon-associated protein subunit beta OS=Homo sapiens OX=9606 GN=SSR2 PE=1 SV=1	13071	20210911_zy_cell_ethcd_1.2623.2623.3	controllerType=0 controllerNumber=1 scan=2623	12.2409
03780:3	26	R.N[+1864.634]HSIFLADINQER.G	HexNAc(2)Hex(9)	N[+1865]	1141.14	3	3421.41	3421.42	0	-0.7	197	Specific	377.12	273.66	273.66	5.7	5	>sp|P50897|PPT1_HUMAN Palmitoyl-protein thioesterase 1 OS=Homo sapiens OX=9606 GN=PPT1 PE=1 SV=1	7591	20210911_zy_cell_ethcd_1.4161.4161.3	controllerType=0 controllerNumber=1 scan=4161	19.2333
01415:3	5	K.NN[+2864.036]HTASILDR.M	HexNAc(7)Hex(8)Fuc(1)	N[+2864]	1335.54	3	4004.61	4004.61	0	0.1	129	Specific	377.52	159.44	159.44	5.55	17	>sp|P08962|CD63_HUMAN CD63 antigen OS=Homo sapiens OX=9606 GN=CD63 PE=1 SV=2	5151	20210911_zy_cell_ethcd_1.1564.1564.3	controllerType=0 controllerNumber=1 scan=1564	7.4229
02739:3	2	R.NPC[+57.021]TSEQN[+1540.529]C[+57.021]TSPFSYK.N	HexNAc(2)Hex(7)	C[+57]*2, N[+1541]	1154.11	3	3460.31	3460.32	0	-1.2	205	Specific	385.67	342.21	342.21	5.31	24	>sp|P05556|ITB1_HUMAN Integrin beta-1 OS=Homo sapiens OX=9606 GN=ITGB1 PE=1 SV=2	3061	20210911_zy_cell_ethcd_1.3018.3018.3	controllerType=0 controllerNumber=1 scan=3018	14.0339
05974:3	40	K.C[+57.021]NMIN[+1702.581]GTDGDSFHPLITK.D	HexNAc(2)Hex(8)	C[+57], N[+1703]	1241.51	3	3722.5	3722.51	0	-1.3	245	Specific	386.69	346.33	346.33	6.38	3	>sp|Q14108|SCRB2_HUMAN Lysosome membrane protein 2 OS=Homo sapiens OX=9606 GN=SCARB2 PE=1 SV=2	18342	20210911_zy_cell_ethcd_1.6573.6573.3	controllerType=0 controllerNumber=1 scan=6573	30.1216
02778:3	6	R.N[+1540.529]ISGVVLADHSGAFHNK.Y	HexNAc(2)Hex(7)	N[+1541]	1102.81	3	3306.42	3306.43	0	-1.2	435	Specific	388.52	295.58	295.58	6.25	12	>sp|Q92542|NICA_HUMAN Nicastrin OS=Homo sapiens OX=9606 GN=NCSTN PE=1 SV=2	7240	20210911_zy_cell_ethcd_1.3061.3061.3	controllerType=0 controllerNumber=1 scan=3061	14.2287
01722:3	6	K.PIN[+1702.581]TTGTLKPDDR.V	HexNAc(2)Hex(8)	N[+1703]	1044.11	3	3130.33	3130.33	0	-1.5	262	Specific	388.86	239.65	239.65	5.77	12	>sp|Q92542|NICA_HUMAN Nicastrin OS=Homo sapiens OX=9606 GN=NCSTN PE=1 SV=2	7240	20210911_zy_cell_ethcd_1.1902.1902.3	controllerType=0 controllerNumber=1 scan=1902	8.9696
01924:3	13	R.YN[+1864.634]HTGQVIIYR.M	HexNAc(2)Hex(9)	N[+1865]	1076.79	3	3228.34	3228.35	0	-0.8	459	Specific	389	217.25	217.25	5.65	11	>sp|P56199|ITA1_HUMAN Integrin alpha-1 OS=Homo sapiens OX=9606 GN=ITGA1 PE=1 SV=2	9701	20210911_zy_cell_ethcd_1.2124.2124.3	controllerType=0 controllerNumber=1 scan=2124	9.9782
01671:2	25	K.N[+1540.529]QSVPLSC[+57.021]C[+57.021]R.E	HexNAc(2)Hex(7)	C[+57]*2, N[+1541]	1381.04	2	2761.08	2761.08	0	-0.2	167	Specific	389.03	274.84	274.84	5.58	5	>sp|O60637|TSN3_HUMAN Tetraspanin-3 OS=Homo sapiens OX=9606 GN=TSPAN3 PE=2 SV=1	16532	20210911_zy_cell_ethcd_1.1846.1846.2	controllerType=0 controllerNumber=1 scan=1846	8.7149
03096:3	4	R.THN[+2059.735]LTDLSPHLR.Y	HexNAc(4)Hex(5)Fuc(1)NeuAc(1)	N[+2060]	1155.16	3	3463.47	3463.47	0	0.1	977	Specific	391.32	169.99	169.99	5.78	23	>sp|P32004|L1CAM_HUMAN Neural cell adhesion molecule L1 OS=Homo sapiens OX=9606 GN=L1CAM PE=1 SV=2	3537	20210911_zy_cell_ethcd_1.3410.3410.3	controllerType=0 controllerNumber=1 scan=3410	15.82
03903:3	35	K.GRDIYTFDGALN[+1540.529]K.S	HexNAc(2)Hex(7)	N[+1541]	1004.09	3	3010.26	3010.27	0	-1.4	62	Specific	392.94	283.82	283.82	5.6	4	>sp|Q08722|CD47_HUMAN Leukocyte surface antigen CD47 OS=Homo sapiens OX=9606 GN=CD47 PE=1 SV=1	886	20210911_zy_cell_ethcd_1.4296.4296.3	controllerType=0 controllerNumber=1 scan=4296	19.8467
01256:3	5	K.NN[+2026.687]HTASILDR.M	HexNAc(2)Hex(10)	N[+2027]	1056.42	3	3167.26	3167.26	0	-1.6	129	Specific	402.24	229.55	229.55	5.76	17	>sp|P08962|CD63_HUMAN CD63 antigen OS=Homo sapiens OX=9606 GN=CD63 PE=1 SV=2	5151	20210911_zy_cell_ethcd_1.1390.1390.3	controllerType=0 controllerNumber=1 scan=1390	6.6161
01765:3	5	K.NN[+3155.132]HTASILDR.M	HexNAc(7)Hex(8)Fuc(1)NeuAc(1)	N[+3155]	1432.57	3	4295.7	4295.71	0	-0.8	129	Specific	404.12	217.52	217.52	5.76	17	>sp|P08962|CD63_HUMAN CD63 antigen OS=Homo sapiens OX=9606 GN=CD63 PE=1 SV=2	5151	20210911_zy_cell_ethcd_1.1949.1949.3	controllerType=0 controllerNumber=1 scan=1949	9.1899
02430:3	14	K.WGHN[+1702.581]ITEFQQR.F	HexNAc(2)Hex(8)	N[+1703]	1040.09	3	3118.26	3118.26	0	-0.6	277	Specific	404.28	269.17	269.17	5.68	7	>sp|Q96HE7|ERO1A_HUMAN ERO1-like protein alpha OS=Homo sapiens OX=9606 GN=ERO1A PE=1 SV=2	2944	20210911_zy_cell_ethcd_1.2679.2679.3	controllerType=0 controllerNumber=1 scan=2679	12.4991
01250:2	49	K.N[+1702.581]YTADYDK.A	HexNAc(2)Hex(8)	N[+1703]	1346.5	2	2692	2692	0	-0.4	106	Specific	404.67	295.14	295.14	5.81	2	>sp|O94905|ERLN2_HUMAN Erlin-2 OS=Homo sapiens OX=9606 GN=ERLIN2 PE=1 SV=1	5719	20210911_zy_cell_ethcd_1.1383.1383.2	controllerType=0 controllerNumber=1 scan=1383	6.5832
00839:3	22	R.GN[+2424.867]VTQHVQGHR.N	HexNAc(5)Hex(6)Fuc(1)NeuAc(1)	N[+2425]	1219.83	3	3657.49	3657.49	0	-0.7	76	Specific	405.62	173.72	173.72	5.77	6	>sp|Q15043|S39AE_HUMAN Zinc transporter ZIP14 OS=Homo sapiens OX=9606 GN=SLC39A14 PE=1 SV=3	16204	20210911_zy_cell_ethcd_1.930.930.3	controllerType=0 controllerNumber=1 scan=930	4.4333
03247:3	4	R.THN[+1872.651]LTDLSPHLR.Y	HexNAc(3)Hex(6)NeuAc(1)	N[+1873]	1092.8	3	3276.39	3276.39	0	-0.7	977	Specific	409.84	224.04	224.04	5.91	23	>sp|P32004|L1CAM_HUMAN Neural cell adhesion molecule L1 OS=Homo sapiens OX=9606 GN=L1CAM PE=1 SV=2	3537	20210911_zy_cell_ethcd_1.3576.3576.3	controllerType=0 controllerNumber=1 scan=3576	16.5825
07490:3	16	R.TTLVDNNTWN[+2026.687]NSHIALVGK.A	HexNAc(2)Hex(10)	N[+2027]	1375.26	3	4123.76	4123.76	0	-0.1	618	Specific	412.88	294.58	91.35	6.32	6	>sp|Q8TCJ2|STT3B_HUMAN Dolichyl-diphosphooligosaccharide--protein glycosyltransferase subunit STT3B OS=Homo sapiens OX=9606 GN=STT3B PE=1 SV=1	13685	20210911_zy_cell_ethcd_1.8271.8271.3	controllerType=0 controllerNumber=1 scan=8271	37.7144
04570:3	1	R.GHTLTLN[+1872.651]FTR.N	HexNAc(3)Hex(6)NeuAc(1)	N[+1873]	1011.43	3	3032.27	3032.27	0	-1.2	97	Specific	414.2	191.35	191.35	5.73	48	>sp|P11279|LAMP1_HUMAN Lysosome-associated membrane glycoprotein 1 OS=Homo sapiens OX=9606 GN=LAMP1 PE=1 SV=3	4405	20210911_zy_cell_ethcd_1.5029.5029.3	controllerType=0 controllerNumber=1 scan=5029	23.1823
01693:3	7	R.YHYN[+1540.529]GTFEDGK.K	HexNAc(2)Hex(7)	N[+1541]	957.703	3	2871.1	2871.1	0	-0.9	67	Specific	415.53	353.96	353.96	5.97	10	>sp|Q96AY3|FKB10_HUMAN Peptidyl-prolyl cis-trans isomerase FKBP10 OS=Homo sapiens OX=9606 GN=FKBP10 PE=1 SV=1	19614	20210911_zy_cell_ethcd_1.1870.1870.3	controllerType=0 controllerNumber=1 scan=1870	8.8269
02414:3	14	K.WGHN[+1864.634]ITEFQQR.F	HexNAc(2)Hex(9)	N[+1865]	1094.11	3	3280.31	3280.32	0	-1.3	277	Specific	416.59	281.72	281.72	5.81	7	>sp|Q96HE7|ERO1A_HUMAN ERO1-like protein alpha OS=Homo sapiens OX=9606 GN=ERO1A PE=1 SV=2	2944	20210911_zy_cell_ethcd_1.2661.2661.3	controllerType=0 controllerNumber=1 scan=2661	12.4169
02885:2	51	K.N[+1540.529]VSC[+57.021]LWC[+57.021]NTNK.A	HexNAc(2)Hex(7)	C[+57]*2, N[+1541]	1468.58	2	2936.14	2936.14	0	0.2	54	Specific	417.51	350.21	350.21	5.97	3	>sp|P53801|PTTG_HUMAN Pituitary tumor-transforming gene 1 protein-interacting protein OS=Homo sapiens OX=9606 GN=PTTG1IP PE=1 SV=1	15135	20210911_zy_cell_ethcd_1.3178.3178.2	controllerType=0 controllerNumber=1 scan=3178	14.7609
02441:3	4	R.THN[+1702.581]LTDLSPHLR.Y	HexNAc(2)Hex(8)	N[+1703]	1036.11	3	3106.32	3106.32	0	-0.7	977	Specific	418.16	255.45	255.45	5.84	23	>sp|P32004|L1CAM_HUMAN Neural cell adhesion molecule L1 OS=Homo sapiens OX=9606 GN=L1CAM PE=1 SV=2	3537	20210911_zy_cell_ethcd_1.2691.2691.3	controllerType=0 controllerNumber=1 scan=2691	12.5514
03005:3	8	R.IAPASN[+1864.634]VSHTVVLRPLK.A	HexNAc(2)Hex(9)	N[+1865]	1222.9	3	3666.7	3666.7	0	-0.2	83	Specific	418.88	340.9	340.9	6.51	8	>sp|P43308|SSRB_HUMAN Translocon-associated protein subunit beta OS=Homo sapiens OX=9606 GN=SSR2 PE=1 SV=1	13071	20210911_zy_cell_ethcd_1.3310.3310.3	controllerType=0 controllerNumber=1 scan=3310	15.3662
01187:3	7	R.YHYN[+1378.476]GTFEDGKK.F	HexNAc(2)Hex(6)	N[+1378]	946.384	3	2837.14	2837.14	0	-1.6	67	Specific	420.87	312.21	312.21	5.73	10	>sp|Q96AY3|FKB10_HUMAN Peptidyl-prolyl cis-trans isomerase FKBP10 OS=Homo sapiens OX=9606 GN=FKBP10 PE=1 SV=1	19614	20210911_zy_cell_ethcd_1.1314.1314.3	controllerType=0 controllerNumber=1 scan=1314	6.2618
00840:2	11	K.N[+1864.634]ATLAEQAK.L	HexNAc(2)Hex(9)	N[+1865]	1405.57	2	2810.13	2810.13	0	-0.9	869	Specific	422.42	275.69	275.69	5.68	14	>sp|Q9Y4L1|HYOU1_HUMAN Hypoxia up-regulated protein 1 OS=Homo sapiens OX=9606 GN=HYOU1 PE=1 SV=1	14756	20210911_zy_cell_ethcd_1.932.932.2	controllerType=0 controllerNumber=1 scan=932	4.4392
02728:3	2	K.LRNPC[+57.021]TSEQN[+2026.687]C[+57.021]TSPFSYK.N	HexNAc(2)Hex(10)	C[+57]*2, N[+2027]	1405.89	3	4215.66	4215.66	0	-0.5	203	Specific	423.05	379.42	379.42	6.76	24	>sp|P05556|ITB1_HUMAN Integrin beta-1 OS=Homo sapiens OX=9606 GN=ITGB1 PE=1 SV=2	3061	20210911_zy_cell_ethcd_1.3006.3006.3	controllerType=0 controllerNumber=1 scan=3006	13.9769
01157:3	7	R.YHYN[+1702.581]GTFEDGKK.F	HexNAc(2)Hex(8)	N[+1703]	1054.42	3	3161.24	3161.25	0	-0.7	67	Specific	427.15	324.01	324.01	5.89	10	>sp|Q96AY3|FKB10_HUMAN Peptidyl-prolyl cis-trans isomerase FKBP10 OS=Homo sapiens OX=9606 GN=FKBP10 PE=1 SV=1	19614	20210911_zy_cell_ethcd_1.1281.1281.3	controllerType=0 controllerNumber=1 scan=1281	6.1032
02901:3	31	R.LEN[+1702.581]ITTGTYTIHAQK.E	HexNAc(2)Hex(8)	N[+1703]	1131.49	3	3392.46	3392.46	0	-1.1	367	Specific	432.57	352.05	352.05	6.09	3	>sp|Q5JPE7|NOMO2_HUMAN Nodal modulator 2 OS=Homo sapiens OX=9606 GN=NOMO2 PE=1 SV=1	6463	20210911_zy_cell_ethcd_1.3196.3196.3	controllerType=0 controllerNumber=1 scan=3196	14.8442
02444:3	4	R.THN[+1540.529]LTDLSPHLR.Y	HexNAc(2)Hex(7)	N[+1541]	982.093	3	2944.26	2944.27	0	-1.1	977	Specific	433.39	276.05	276.05	5.84	23	>sp|P32004|L1CAM_HUMAN Neural cell adhesion molecule L1 OS=Homo sapiens OX=9606 GN=L1CAM PE=1 SV=2	3537	20210911_zy_cell_ethcd_1.2694.2694.3	controllerType=0 controllerNumber=1 scan=2694	12.5664
01620:3	29	K.EQYIHEN[+1702.581]YSR.A	HexNAc(2)Hex(8)	N[+1703]	1014.4	3	3041.18	3041.19	0	-1.4	542	Specific	440.44	288.48	288.48	5.8	4	>sp|O60568|PLOD3_HUMAN Multifunctional procollagen lysine hydroxylase and glycosyltransferase LH3 OS=Homo sapiens OX=9606 GN=PLOD3 PE=1 SV=1	10856	20210911_zy_cell_ethcd_1.1790.1790.3	controllerType=0 controllerNumber=1 scan=1790	8.4585
01886:3	54	K.YHVLHIN[+1710.598]TTK.N	HexNAc(3)Hex(5)NeuAc(1)	N[+1711]	979.427	3	2936.27	2936.27	0	0.3	102	Specific	440.8	218.72	218.72	5.17	3	>sp|Q7LGA3|HS2ST_HUMAN Heparan sulfate 2-O-sulfotransferase 1 OS=Homo sapiens OX=9606 GN=HS2ST1 PE=1 SV=1	4219	20210911_zy_cell_ethcd_1.2082.2082.3	controllerType=0 controllerNumber=1 scan=2082	9.789
01781:3	5	K.NN[+2789.999]HTASILDR.M	HexNAc(6)Hex(7)Fuc(1)NeuAc(1)	N[+2790]	1310.86	3	3930.57	3930.57	0	-0.6	129	Specific	441.75	232.84	232.84	5.75	17	>sp|P08962|CD63_HUMAN CD63 antigen OS=Homo sapiens OX=9606 GN=CD63 PE=1 SV=2	5151	20210911_zy_cell_ethcd_1.1967.1967.3	controllerType=0 controllerNumber=1 scan=1967	9.27
02705:3	3	K.VASVININPN[+1419.502]TTHSTGSC[+57.021]R.S	HexNAc(3)Hex(5)	C[+57], N[+1420]	1149.84	3	3447.49	3447.49	0	-0.3	248	Specific	445.7	333.56	333.56	6.48	23	>sp|P13473|LAMP2_HUMAN Lysosome-associated membrane glycoprotein 2 OS=Homo sapiens OX=9606 GN=LAMP2 PE=1 SV=2	6694	20210911_zy_cell_ethcd_1.2980.2980.3	controllerType=0 controllerNumber=1 scan=2980	13.8642
02945:3	31	R.LEN[+1378.476]ITTGTYTIHAQK.E	HexNAc(2)Hex(6)	N[+1378]	1023.46	3	3068.35	3068.36	0	-1.6	367	Specific	448.09	332.39	332.39	6.08	3	>sp|Q5JPE7|NOMO2_HUMAN Nodal modulator 2 OS=Homo sapiens OX=9606 GN=NOMO2 PE=1 SV=1	6463	20210911_zy_cell_ethcd_1.3244.3244.3	controllerType=0 controllerNumber=1 scan=3244	15.0635
02729:3	2	K.LRNPC[+57.021]TSEQN[+1864.634]C[+57.021]TSPFSYK.N	HexNAc(2)Hex(9)	C[+57]*2, N[+1865]	1351.87	3	4053.61	4053.61	0	-0.7	203	Specific	451.6	355.69	355.69	6.25	24	>sp|P05556|ITB1_HUMAN Integrin beta-1 OS=Homo sapiens OX=9606 GN=ITGB1 PE=1 SV=2	3061	20210911_zy_cell_ethcd_1.3007.3007.3	controllerType=0 controllerNumber=1 scan=3007	13.9829
02431:3	4	R.THN[+1864.634]LTDLSPHLR.Y	HexNAc(2)Hex(9)	N[+1865]	1090.13	3	3268.37	3268.37	0	-0.7	977	Specific	455.11	293.59	293.59	5.95	23	>sp|P32004|L1CAM_HUMAN Neural cell adhesion molecule L1 OS=Homo sapiens OX=9606 GN=L1CAM PE=1 SV=2	3537	20210911_zy_cell_ethcd_1.2680.2680.3	controllerType=0 controllerNumber=1 scan=2680	12.504
02369:3	5	K.NN[+2350.830]HTASILDR.M	HexNAc(4)Hex(5)Fuc(1)NeuAc(2)	N[+2351]	1164.47	3	3491.4	3491.41	0	-0.7	129	Specific	457.75	242.87	242.87	5.68	17	>sp|P08962|CD63_HUMAN CD63 antigen OS=Homo sapiens OX=9606 GN=CD63 PE=1 SV=2	5151	20210911_zy_cell_ethcd_1.2612.2612.3	controllerType=0 controllerNumber=1 scan=2612	12.1881
02403:4	21	K.PGN[+1702.581]LSRPPPVVVPHQPR.L	HexNAc(2)Hex(8)	N[+1703]	888.159	4	3549.61	3549.62	0	-2	487	Specific	458.08	426.52	426.52	6.63	3	>sp|Q9BU23|LMF2_HUMAN Lipase maturation factor 2 OS=Homo sapiens OX=9606 GN=LMF2 PE=1 SV=2	7424	20210911_zy_cell_ethcd_1.2649.2649.4	controllerType=0 controllerNumber=1 scan=2649	12.3619
02981:3	10	R.EAGN[+2350.830]HTSGAGLVQINK.S	HexNAc(4)Hex(5)Fuc(1)NeuAc(2)	N[+2351]	1316.22	3	3946.64	3946.64	0	-0.2	80	Specific	467.48	314.37	314.37	6.32	11	>sp|P20645|MPRD_HUMAN Cation-dependent mannose-6-phosphate receptor OS=Homo sapiens OX=9606 GN=M6PR PE=1 SV=1	11960	20210911_zy_cell_ethcd_1.3283.3283.3	controllerType=0 controllerNumber=1 scan=3283	15.2442
02585:4	9	R.FTFTSHTPGEHQIC[+57.021]LHSN[+1378.476]STK.F	HexNAc(2)Hex(6)	C[+57], N[+1378]	952.656	4	3807.6	3807.61	0	-1.4	108	Specific	472.88	425.42	425.42	6.44	4	>sp|Q9BVK6|TMED9_HUMAN Transmembrane emp24 domain-containing protein 9 OS=Homo sapiens OX=9606 GN=TMED9 PE=1 SV=2	14554	20210911_zy_cell_ethcd_1.2849.2849.4	controllerType=0 controllerNumber=1 scan=2849	13.2707
05183:2	41	K.QNNGAFN[+203.079]ETLFR.N	HexNAc(1)	N[+203]	807.38	2	1613.75	1613.76	0	-2	721	Specific	473.81	371.97	371.97	5.63	6	>sp|P02786|TFR1_HUMAN Transferrin receptor protein 1 OS=Homo sapiens OX=9606 GN=TFRC PE=1 SV=2	16028	20210911_zy_cell_ethcd_1.5701.5701.2	controllerType=0 controllerNumber=1 scan=5701	26.2154
07773:3	65	R.N[+1702.581]C[+57.021]SAAPQPEPAAGLASYPELR.L	HexNAc(2)Hex(8)	C[+57], N[+1703]	1301.21	3	3901.62	3901.63	0	-1.8	87	Specific	477.22	413.97	413.97	5.34	4	>sp|O75718|CRTAP_HUMAN Cartilage-associated protein OS=Homo sapiens OX=9606 GN=CRTAP PE=1 SV=1	8728	20210911_zy_cell_ethcd_1.8596.8596.3	controllerType=0 controllerNumber=1 scan=8596	39.166
02636:3	3	K.VASVININPN[+1540.529]TTHSTGSC[+57.021]R.S	HexNAc(2)Hex(7)	C[+57], N[+1541]	1190.18	3	3568.52	3568.52	0	-1.3	248	Specific	480.36	383.12	383.12	7.11	23	>sp|P13473|LAMP2_HUMAN Lysosome-associated membrane glycoprotein 2 OS=Homo sapiens OX=9606 GN=LAMP2 PE=1 SV=2	6694	20210911_zy_cell_ethcd_1.2905.2905.3	controllerType=0 controllerNumber=1 scan=2905	13.5268
03146:3	28	R.VTPAC[+57.021]N[+2350.830]TSLPAQR.W	HexNAc(4)Hex(5)Fuc(1)NeuAc(2)	C[+57], N[+2351]	1255.85	3	3765.54	3765.54	0	-0.7	64	Specific	483.47	220.56	220.56	4.94	11	>sp|Q9UBG0|MRC2_HUMAN C-type mannose receptor 2 OS=Homo sapiens OX=9606 GN=MRC2 PE=1 SV=2	16756	20210911_zy_cell_ethcd_1.3464.3464.3	controllerType=0 controllerNumber=1 scan=3464	16.0716
03770:3	26	R.N[+2026.687]HSIFLADINQER.G	HexNAc(2)Hex(10)	N[+2027]	1195.16	3	3583.47	3583.47	0	-0.8	197	Specific	487.16	341.19	341.19	6.2	5	>sp|P50897|PPT1_HUMAN Palmitoyl-protein thioesterase 1 OS=Homo sapiens OX=9606 GN=PPT1 PE=1 SV=1	7591	20210911_zy_cell_ethcd_1.4150.4150.3	controllerType=0 controllerNumber=1 scan=4150	19.1823
05164:2	41	K.QNNGAFN[+203.079]ETLFR.N	HexNAc(1)	N[+203]	807.38	2	1613.75	1613.76	0	-1.9	721	Specific	487.65	375.08	375.08	5.76	6	>sp|P02786|TFR1_HUMAN Transferrin receptor protein 1 OS=Homo sapiens OX=9606 GN=TFRC PE=1 SV=2	16028	20210911_zy_cell_ethcd_1.5680.5680.2	controllerType=0 controllerNumber=1 scan=5680	26.117
02655:3	3	K.VASVININPN[+1581.555]TTHSTGSC[+57.021]R.S	HexNAc(3)Hex(6)	C[+57], N[+1582]	1203.85	3	3609.54	3609.55	0	-1.7	248	Specific	490.41	349.56	349.56	6.6	23	>sp|P13473|LAMP2_HUMAN Lysosome-associated membrane glycoprotein 2 OS=Homo sapiens OX=9606 GN=LAMP2 PE=1 SV=2	6694	20210911_zy_cell_ethcd_1.2926.2926.3	controllerType=0 controllerNumber=1 scan=2926	13.623
02709:3	3	K.VASVININPN[+1565.560]TTHSTGSC[+57.021]R.S	HexNAc(3)Hex(5)Fuc(1)	C[+57], N[+1566]	1198.52	3	3593.55	3593.55	0	-1.1	248	Specific	516.25	397.94	397.94	6.52	23	>sp|P13473|LAMP2_HUMAN Lysosome-associated membrane glycoprotein 2 OS=Homo sapiens OX=9606 GN=LAMP2 PE=1 SV=2	6694	20210911_zy_cell_ethcd_1.2985.2985.3	controllerType=0 controllerNumber=1 scan=2985	13.884
03025:3	1	R.GHTLTLN[+1540.529]FTR.N	HexNAc(2)Hex(7)	N[+1541]	900.721	3	2700.15	2700.15	0	-0.7	97	Specific	516.58	362.94	362.94	6.6	48	>sp|P11279|LAMP1_HUMAN Lysosome-associated membrane glycoprotein 1 OS=Homo sapiens OX=9606 GN=LAMP1 PE=1 SV=3	4405	20210911_zy_cell_ethcd_1.3332.3332.3	controllerType=0 controllerNumber=1 scan=3332	15.4661
02238:3	10	R.EAGN[+2059.735]HTSGAGLVQINK.S	HexNAc(4)Hex(5)Fuc(1)NeuAc(1)	N[+2060]	1219.19	3	3655.55	3655.55	0	-0.4	80	Specific	530.5	341.17	341.17	6.59	11	>sp|P20645|MPRD_HUMAN Cation-dependent mannose-6-phosphate receptor OS=Homo sapiens OX=9606 GN=M6PR PE=1 SV=1	11960	20210911_zy_cell_ethcd_1.2468.2468.3	controllerType=0 controllerNumber=1 scan=2468	11.5247
02208:3	74	R.GYYN[+2350.830]QSEAGSHTLQR.M	HexNAc(4)Hex(5)Fuc(1)NeuAc(2)	N[+2351]	1354.54	3	4061.61	4061.61	0	-0.3	107	Specific	533.26	112.91	112.91	5.74	1	>sp|Q29836|1B67_HUMAN HLA class I histocompatibility antigen, B-67 alpha chain OS=Homo sapiens OX=9606 GN=HLA-B PE=1 SV=1	223	20210911_zy_cell_ethcd_1.2435.2435.3	controllerType=0 controllerNumber=1 scan=2435	11.371
02720:3	2	R.NPC[+57.021]TSEQN[+1702.581]C[+57.021]TSPFSYK.N	HexNAc(2)Hex(8)	C[+57]*2, N[+1703]	1208.13	3	3622.37	3622.37	0	-0.6	205	Specific	539.56	476.65	476.65	6.04	24	>sp|P05556|ITB1_HUMAN Integrin beta-1 OS=Homo sapiens OX=9606 GN=ITGB1 PE=1 SV=2	3061	20210911_zy_cell_ethcd_1.2997.2997.3	controllerType=0 controllerNumber=1 scan=2997	13.9375
04693:3	15	R.TILVDNNTWN[+1702.581]NTHISR.V	HexNAc(2)Hex(8)	N[+1703]	1200.85	3	3600.53	3600.53	0	-1	539	Specific	566.7	428.05	86.19	7.65	4	>sp|P46977|STT3A_HUMAN Dolichyl-diphosphooligosaccharide--protein glycosyltransferase subunit STT3A OS=Homo sapiens OX=9606 GN=STT3A PE=1 SV=2	18762	20210911_zy_cell_ethcd_1.5164.5164.3	controllerType=0 controllerNumber=1 scan=5164	23.7899
02701:3	2	R.NPC[+57.021]TSEQN[+1864.634]C[+57.021]TSPFSYK.N	HexNAc(2)Hex(9)	C[+57]*2, N[+1865]	1262.15	3	3784.43	3784.42	0	0.8	205	Specific	569.47	520.28	520.28	5.97	24	>sp|P05556|ITB1_HUMAN Integrin beta-1 OS=Homo sapiens OX=9606 GN=ITGB1 PE=1 SV=2	3061	20210911_zy_cell_ethcd_1.2976.2976.3	controllerType=0 controllerNumber=1 scan=2976	13.8452
03055:3	47	K.GQTEIQVNC[+57.021]PPAVTEN[+1540.529]K.T	HexNAc(2)Hex(7)	C[+57], N[+1541]	1142.48	3	3425.44	3425.44	0	-0.8	56	Specific	570.02	430.32	430.32	6.58	2	>sp|Q16563|SYPL1_HUMAN Synaptophysin-like protein 1 OS=Homo sapiens OX=9606 GN=SYPL1 PE=1 SV=1	16250	20210911_zy_cell_ethcd_1.3365.3365.3	controllerType=0 controllerNumber=1 scan=3365	15.6159
00845:2	11	K.N[+1702.581]ATLAEQAK.L	HexNAc(2)Hex(8)	N[+1703]	1324.54	2	2648.08	2648.08	0	-0.7	869	Specific	572.26	399.16	399.16	7.13	14	>sp|Q9Y4L1|HYOU1_HUMAN Hypoxia up-regulated protein 1 OS=Homo sapiens OX=9606 GN=HYOU1 PE=1 SV=1	14756	20210911_zy_cell_ethcd_1.937.937.2	controllerType=0 controllerNumber=1 scan=937	4.4672
03017:4	8	R.IAPASN[+1702.581]VSHTVVLRPLK.A	HexNAc(2)Hex(8)	N[+1703]	876.917	4	3504.64	3504.65	0	-0.5	83	Specific	576.79	512.28	512.28	7.65	8	>sp|P43308|SSRB_HUMAN Translocon-associated protein subunit beta OS=Homo sapiens OX=9606 GN=SSR2 PE=1 SV=1	13071	20210911_zy_cell_ethcd_1.3323.3323.4	controllerType=0 controllerNumber=1 scan=3323	15.4267
04683:3	15	R.TILVDNNTWN[+1864.634]NTHISR.V	HexNAc(2)Hex(9)	N[+1865]	1254.87	3	3762.58	3762.59	0	-0.9	539	Specific	582.97	427.89	86.1	7.65	4	>sp|P46977|STT3A_HUMAN Dolichyl-diphosphooligosaccharide--protein glycosyltransferase subunit STT3A OS=Homo sapiens OX=9606 GN=STT3A PE=1 SV=2	18762	20210911_zy_cell_ethcd_1.5153.5153.3	controllerType=0 controllerNumber=1 scan=5153	23.7403
02748:3	6	R.N[+1702.581]ISGVVLADHSGAFHNK.Y	HexNAc(2)Hex(8)	N[+1703]	1156.83	3	3468.47	3468.48	0	-1.3	435	Specific	601.92	450.83	450.83	8.68	12	>sp|Q92542|NICA_HUMAN Nicastrin OS=Homo sapiens OX=9606 GN=NCSTN PE=1 SV=2	7240	20210911_zy_cell_ethcd_1.3028.3028.3	controllerType=0 controllerNumber=1 scan=3028	14.0781
02555:4	9	R.FTFTSHTPGEHQIC[+57.021]LHSN[+1540.529]STK.F	HexNAc(2)Hex(7)	C[+57], N[+1541]	993.168	4	3969.65	3969.66	0	-1.7	108	Specific	636.66	573.71	573.71	8.1	4	>sp|Q9BVK6|TMED9_HUMAN Transmembrane emp24 domain-containing protein 9 OS=Homo sapiens OX=9606 GN=TMED9 PE=1 SV=2	14554	20210911_zy_cell_ethcd_1.2816.2816.4	controllerType=0 controllerNumber=1 scan=2816	13.1195
01366:3	33	K.SQNRPQGQSTQPSNAAGTN[+203.079]TTSASTPR.S	HexNAc(1)	N[+203]	983.128	3	2947.37	2947.37	0	-1.7	104	Specific	654.15	604.62	604.62	9.37	2	>sp|Q9UHD9|UBQL2_HUMAN Ubiquilin-2 OS=Homo sapiens OX=9606 GN=UBQLN2 PE=1 SV=2	18505	20210911_zy_cell_ethcd_1.1511.1511.3	controllerType=0 controllerNumber=1 scan=1511	7.1808
02389:4	21	K.PGN[+1864.634]LSRPPPVVVPHQPR.L	HexNAc(2)Hex(9)	N[+1865]	928.673	4	3711.67	3711.67	0	-1.1	487	Specific	699.66	618.43	618.43	9.65	3	>sp|Q9BU23|LMF2_HUMAN Lipase maturation factor 2 OS=Homo sapiens OX=9606 GN=LMF2 PE=1 SV=2	7424	20210911_zy_cell_ethcd_1.2634.2634.4	controllerType=0 controllerNumber=1 scan=2634	12.2927
02535:4	9	R.FTFTSHTPGEHQIC[+57.021]LHSN[+1702.581]STK.F	HexNAc(2)Hex(8)	C[+57], N[+1703]	1033.68	4	4131.71	4131.71	0	-0.4	108	Specific	991.73	884.4	884.4	15.1	4	>sp|Q9BVK6|TMED9_HUMAN Transmembrane emp24 domain-containing protein 9 OS=Homo sapiens OX=9606 GN=TMED9 PE=1 SV=2	14554	20210911_zy_cell_ethcd_1.2794.2794.4	controllerType=0 controllerNumber=1 scan=2794	13.0191

## Sheet: EThcD-R2
Query #:z	Protein Rank	Peptide < ProteinMetrics Confidential >	Glycans NHFAGNa	Modification Type(s)	Observed m/z	z	Observed (M+H)	Calc. mass (M+H)	Off-by-x error	Mass error (ppm)	Starting position	Cleavage	Score	Delta	Delta Mod	|Log Prob|	# of unique peptides	Protein Name	Protein DB number	Comment	Scan #	Scan Time
02752:2	19	K.YFN[+1702.581]YTVK.V	HexNAc(2)Hex(8)	N[+1703]	1319.03	2	2637.05	2637.05	0	-0.3	61	Specific	200.11	39.24	39.24	3.61	8	>sp|O00469|PLOD2_HUMAN Procollagen-lysine,2-oxoglutarate 5-dioxygenase 2 OS=Homo sapiens OX=9606 GN=PLOD2 PE=1 SV=2	15649	20210911_zy_cell_ethcd_2.3031.3031.2	controllerType=0 controllerNumber=1 scan=3031	14.125
06802:3	82	R.AKPQGQWAEDVLGN[+2350.830]K.T	HexNAc(4)Hex(5)Fuc(1)NeuAc(2)	N[+2351]	1331.23	3	3991.67	3991.67	0	-0.7	66	Specific	200.96	109.52	109.52	4.56	2	>sp|Q29983|MICA_HUMAN MHC class I polypeptide-related sequence A OS=Homo sapiens OX=9606 GN=MICA PE=1 SV=1	7436	20210911_zy_cell_ethcd_2.7500.7500.3	controllerType=0 controllerNumber=1 scan=7500	34.4147
02088:2	74	R.DVN[+1378.476]C[+57.021]SVMGPQEK.K	HexNAc(2)Hex(6)	C[+57], N[+1378]	1371.54	2	2742.07	2742.07	0	0	51	Specific	201.26	150.82	150.82	4.2	2	>sp|P53634|CATC_HUMAN Dipeptidyl peptidase 1 OS=Homo sapiens OX=9606 GN=CTSC PE=1 SV=2	6868	20210911_zy_cell_ethcd_2.2302.2302.2	controllerType=0 controllerNumber=1 scan=2302	10.8046
01766:2	21	K.N[+1216.423]QSVPLSC[+57.021]C[+57.021]R.E	HexNAc(2)Hex(5)	C[+57]*2, N[+1216]	1218.99	2	2436.97	2436.97	0	-1	167	Specific	201.3	166.22	166.22	4.57	7	>sp|O60637|TSN3_HUMAN Tetraspanin-3 OS=Homo sapiens OX=9606 GN=TSPAN3 PE=2 SV=1	16532	20210911_zy_cell_ethcd_2.1948.1948.2	controllerType=0 controllerNumber=1 scan=1948	9.2001
04170:2	33	R.N[+1864.634]VSTNVFFK.Q	HexNAc(2)Hex(9)	N[+1865]	1460.59	2	2920.18	2920.19	0	-3.3	337	Specific	201.54	91.17	91.17	3.95	10	>sp|Q6YHK3|CD109_HUMAN CD109 antigen OS=Homo sapiens OX=9606 GN=CD109 PE=1 SV=2	8627	20210911_zy_cell_ethcd_2.4588.4588.3	controllerType=0 controllerNumber=1 scan=4588	21.2333
00744:3	26	R.GN[+2133.772]VTQHVQGHR.N	HexNAc(5)Hex(6)Fuc(1)	N[+2134]	1122.8	3	3366.39	3366.4	0	-0.6	76	Specific	202.04	81.45	81.45	3.94	5	>sp|Q15043|S39AE_HUMAN Zinc transporter ZIP14 OS=Homo sapiens OX=9606 GN=SLC39A14 PE=1 SV=3	16204	20210911_zy_cell_ethcd_2.824.824.3	controllerType=0 controllerNumber=1 scan=824	3.9287
00849:3	1	R.KDN[+2059.735]TTVTR.L	HexNAc(4)Hex(5)Fuc(1)NeuAc(1)	N[+2060]	998.747	3	2994.23	2994.23	0	-0.7	247	Specific	202.31	66	66	3.94	48	>sp|P11279|LAMP1_HUMAN Lysosome-associated membrane glycoprotein 1 OS=Homo sapiens OX=9606 GN=LAMP1 PE=1 SV=3	4405	20210911_zy_cell_ethcd_2.940.940.3	controllerType=0 controllerNumber=1 scan=940	4.4702
05621:3	44	R.RLSAVNSIFLSHN[+2350.830]NTK.E	HexNAc(4)Hex(5)Fuc(1)NeuAc(2)	N[+2351]	1384.61	3	4151.8	4151.8	0	0.1	441	Specific	203.21	96.18	96.18	4.08	6	>sp|P48960|CD97_HUMAN CD97 antigen OS=Homo sapiens OX=9606 GN=CD97 PE=1 SV=4	8146	20210911_zy_cell_ethcd_2.6187.6187.3	controllerType=0 controllerNumber=1 scan=6187	28.4914
04547:3	120	K.VLGQSQEPNVNPASAGN[+2350.830]QTQK.T	HexNAc(4)Hex(5)Fuc(1)NeuAc(2)	N[+2351]	1506.31	3	4516.9	4517.9	-1	0.1	153	Specific	203.87	116.56	116.56	2.02	1	>sp|Q5VW38|GP107_HUMAN Protein GPR107 OS=Homo sapiens OX=9606 GN=GPR107 PE=1 SV=1	8685	20210911_zy_cell_ethcd_2.5003.5003.3	controllerType=0 controllerNumber=1 scan=5003	23.1381
01688:3	28	K.EQYIHEN[+1864.634]YSR.A	HexNAc(2)Hex(9)	N[+1865]	1068.41	3	3203.23	3203.24	0	-4.7	542	Specific	204	90.35	90.35	3.76	5	>sp|O60568|PLOD3_HUMAN Multifunctional procollagen lysine hydroxylase and glycosyltransferase LH3 OS=Homo sapiens OX=9606 GN=PLOD3 PE=1 SV=1	10856	20210911_zy_cell_ethcd_2.1863.1863.3	controllerType=0 controllerNumber=1 scan=1863	8.8028
04153:2	33	R.N[+1864.634]VSTNVFFK.Q	HexNAc(2)Hex(9)	N[+1865]	1460.6	2	2920.18	2920.19	0	-1.1	337	Specific	204.84	130.69	130.69	4.75	10	>sp|Q6YHK3|CD109_HUMAN CD109 antigen OS=Homo sapiens OX=9606 GN=CD109 PE=1 SV=2	8627	20210911_zy_cell_ethcd_2.4570.4570.2	controllerType=0 controllerNumber=1 scan=4570	21.1431
07352:2	92	K.N[+1872.651]GSLFAFR.G	HexNAc(3)Hex(6)NeuAc(1)	N[+1873]	1392.57	2	2784.12	2784.12	0	-0.3	169	Specific	205.03	104.15	104.15	4.19	2	>sp|P04004|VTNC_HUMAN Vitronectin OS=Homo sapiens OX=9606 GN=VTN PE=1 SV=1	17960	20210911_zy_cell_ethcd_2.8131.8131.2	controllerType=0 controllerNumber=1 scan=8131	37.1826
01339:3	4	K.NN[+1864.634]HTASILDR.M	HexNAc(2)Hex(9)	N[+1865]	1002.41	3	3005.21	3005.21	0	-1	129	Specific	205.84	45.02	45.02	4.27	21	>sp|P08962|CD63_HUMAN CD63 antigen OS=Homo sapiens OX=9606 GN=CD63 PE=1 SV=2	5151	20210911_zy_cell_ethcd_2.1479.1479.3	controllerType=0 controllerNumber=1 scan=1479	7.0261
03936:2	5	R.GYN[+1864.634]VTYWR.E	HexNAc(2)Hex(9)	N[+1865]	1462.07	2	2923.14	2923.14	0	-0.2	847	Specific	205.98	107.92	107.92	4.19	22	>sp|P32004|L1CAM_HUMAN Neural cell adhesion molecule L1 OS=Homo sapiens OX=9606 GN=L1CAM PE=1 SV=2	3537	20210911_zy_cell_ethcd_2.4331.4331.3	controllerType=0 controllerNumber=1 scan=4331	20.0517
03482:2	89	R.NYFLVN[+1702.581]GTSR.E	HexNAc(2)Hex(8)	N[+1703]	1437.09	2	2873.17	2873.17	0	0.3	190	Specific	207.24	112.31	112.31	4.08	3	>sp|P15509|CSF2R_HUMAN Granulocyte-macrophage colony-stimulating factor receptor subunit alpha OS=Homo sapiens OX=9606 GN=CSF2RA PE=1 SV=1	5252	20210911_zy_cell_ethcd_2.3833.3833.2	controllerType=0 controllerNumber=1 scan=3833	17.7874
07312:2	92	K.N[+1872.651]GSLFAFR.G	HexNAc(3)Hex(6)NeuAc(1)	N[+1873]	1392.56	2	2784.12	2784.12	0	-0.7	169	Specific	207.61	72.76	72.76	3.94	2	>sp|P04004|VTNC_HUMAN Vitronectin OS=Homo sapiens OX=9606 GN=VTN PE=1 SV=1	17960	20210911_zy_cell_ethcd_2.8086.8086.3	controllerType=0 controllerNumber=1 scan=8086	36.9768
01348:2	1	K.DN[+2059.735]TTVTR.L	HexNAc(4)Hex(5)Fuc(1)NeuAc(1)	N[+2060]	1433.57	2	2866.14	2866.14	0	0.2	248	Specific	207.99	25.71	25.71	2.14	48	>sp|P11279|LAMP1_HUMAN Lysosome-associated membrane glycoprotein 1 OS=Homo sapiens OX=9606 GN=LAMP1 PE=1 SV=3	4405	20210911_zy_cell_ethcd_2.1489.1489.2	controllerType=0 controllerNumber=1 scan=1489	7.0705
02258:2	56	K.ALSPN[+1702.581]STISSAPK.D	HexNAc(2)Hex(8)	N[+1703]	1488.13	2	2975.26	2975.26	0	-0.4	632	Specific	208.11	103.07	103.07	4.56	3	>sp|Q9UH99|SUN2_HUMAN SUN domain-containing protein 2 OS=Homo sapiens OX=9606 GN=SUN2 PE=1 SV=3	18015	20210911_zy_cell_ethcd_2.2488.2488.2	controllerType=0 controllerNumber=1 scan=2488	11.6434
04873:3	18	R.PGAM[+15.995]N[+2116.756]FSYSPLLR.E	HexNAc(5)Hex(5)NeuAc(1)	M[+16], N[+2117]	1195.83	3	3585.48	3585.48	0	-0.4	239	Specific	208.25	19.04	19.04	1.62	8	>sp|O15230|LAMA5_HUMAN Laminin subunit alpha-5 OS=Homo sapiens OX=9606 GN=LAMA5 PE=1 SV=8	2334	20210911_zy_cell_ethcd_2.5362.5362.3	controllerType=0 controllerNumber=1 scan=5362	24.7712
03011:3	25	R.KIPAIN[+1378.476]QTITEANEK.T	HexNAc(2)Hex(6)	N[+1378]	1016.8	3	3048.38	3048.39	0	-1.5	1390	Specific	208.83	113.82	113.82	4.69	10	>sp|P11047|LAMC1_HUMAN Laminin subunit gamma-1 OS=Homo sapiens OX=9606 GN=LAMC1 PE=1 SV=3	4746	20210911_zy_cell_ethcd_2.3315.3315.3	controllerType=0 controllerNumber=1 scan=3315	15.428
03847:3	2	K.LRNPC[+57.021]TSEQN[+2059.735]C[+57.021]TSPFSYK.N	HexNAc(4)Hex(5)Fuc(1)NeuAc(1)	C[+57]*2, N[+2060]	1416.58	3	4247.72	4248.71	-1	3.9	203	Specific	209.18	97.52	97.52	3.62	27	>sp|P05556|ITB1_HUMAN Integrin beta-1 OS=Homo sapiens OX=9606 GN=ITGB1 PE=1 SV=2	3061	20210911_zy_cell_ethcd_2.4234.4234.3	controllerType=0 controllerNumber=1 scan=4234	19.6194
01536:3	1	R.KDN[+3007.058]TTVTR.L	HexNAc(5)Hex(6)Fuc(1)NeuAc(3)	N[+3007]	1314.52	3	3941.55	3941.55	0	0.1	247	Specific	209.63	58.35	58.35	3.73	48	>sp|P11279|LAMP1_HUMAN Lysosome-associated membrane glycoprotein 1 OS=Homo sapiens OX=9606 GN=LAMP1 PE=1 SV=3	4405	20210911_zy_cell_ethcd_2.1696.1696.3	controllerType=0 controllerNumber=1 scan=1696	8.0284
02280:2	56	K.ALSPN[+1540.529]STISSAPK.D	HexNAc(2)Hex(7)	N[+1541]	1407.11	2	2813.21	2813.21	0	0.3	632	Specific	210.22	65.19	65.19	3.91	3	>sp|Q9UH99|SUN2_HUMAN SUN domain-containing protein 2 OS=Homo sapiens OX=9606 GN=SUN2 PE=1 SV=3	18015	20210911_zy_cell_ethcd_2.2512.2512.2	controllerType=0 controllerNumber=1 scan=2512	11.7555
01720:3	29	R.FNQC[+57.021]N[+2204.772]TTR.G	HexNAc(4)Hex(5)NeuAc(2)	C[+57], N[+2205]	1082.41	3	3245.23	3245.23	0	-1.3	137	Specific	210.34	75.89	75.89	3.69	10	>sp|P09923|PPBI_HUMAN Intestinal-type alkaline phosphatase OS=Homo sapiens OX=9606 GN=ALPI PE=1 SV=2	15196	20210911_zy_cell_ethcd_2.1898.1898.3	controllerType=0 controllerNumber=1 scan=1898	8.9665
03331:3	34	R.VTPAC[+57.021]N[+2350.830]TSLPAQR.W	HexNAc(4)Hex(5)Fuc(1)NeuAc(2)	C[+57], N[+2351]	1255.85	3	3765.54	3765.54	0	-0.3	64	Specific	211.32	89.79	89.79	3.96	11	>sp|Q9UBG0|MRC2_HUMAN C-type mannose receptor 2 OS=Homo sapiens OX=9606 GN=MRC2 PE=1 SV=2	16756	20210911_zy_cell_ethcd_2.3667.3667.3	controllerType=0 controllerNumber=1 scan=3667	17.0263
01230:3	26	R.GN[+2715.963]VTQHVQGHR.N	HexNAc(5)Hex(6)Fuc(1)NeuAc(2)	N[+2716]	1316.87	3	3948.59	3948.59	0	0.6	76	Specific	211.57	63.33	63.33	3.81	5	>sp|Q15043|S39AE_HUMAN Zinc transporter ZIP14 OS=Homo sapiens OX=9606 GN=SLC39A14 PE=1 SV=3	16204	20210911_zy_cell_ethcd_2.1359.1359.3	controllerType=0 controllerNumber=1 scan=1359	6.4654
02058:3	34	K.N[+2350.830]C[+57.021]TSFR.A	HexNAc(4)Hex(5)Fuc(1)NeuAc(2)	C[+57], N[+2351]	1045.73	3	3135.17	3135.17	0	-0.8	634	Specific	211.66	51.35	51.35	3.66	11	>sp|Q9UBG0|MRC2_HUMAN C-type mannose receptor 2 OS=Homo sapiens OX=9606 GN=MRC2 PE=1 SV=2	16756	20210911_zy_cell_ethcd_2.2269.2269.3	controllerType=0 controllerNumber=1 scan=2269	10.6516
02234:2	11	K.TN[+1540.529]ITLVC[+57.021]K.P	HexNAc(2)Hex(7)	C[+57], N[+1541]	1245.03	2	2489.05	2489.05	0	0.3	580	Specific	211.73	121.56	121.56	3.97	13	>sp|P11717|MPRI_HUMAN Cation-independent mannose-6-phosphate receptor OS=Homo sapiens OX=9606 GN=IGF2R PE=1 SV=3	12317	20210911_zy_cell_ethcd_2.2462.2462.2	controllerType=0 controllerNumber=1 scan=2462	11.5208
01097:3	8	R.TLSRPSETC[+57.021]N[+1864.634]ETTK.L	HexNAc(2)Hex(9)	C[+57], N[+1865]	1163.47	3	3488.4	3488.4	0	-0.4	384	Specific	212.41	110.15	110.15	4.56	10	>sp|Q96AY3|FKB10_HUMAN Peptidyl-prolyl cis-trans isomerase FKBP10 OS=Homo sapiens OX=9606 GN=FKBP10 PE=1 SV=1	19614	20210911_zy_cell_ethcd_2.1213.1213.3	controllerType=0 controllerNumber=1 scan=1213	5.7786
02439:2	1	R.LLNINPN[+1378.476]K.T	HexNAc(2)Hex(6)	N[+1378]	1152.51	2	2304.02	2304.02	0	-1.1	255	Specific	212.68	96.36	96.36	4.3	48	>sp|P11279|LAMP1_HUMAN Lysosome-associated membrane glycoprotein 1 OS=Homo sapiens OX=9606 GN=LAMP1 PE=1 SV=3	4405	20210911_zy_cell_ethcd_2.2687.2687.3	controllerType=0 controllerNumber=1 scan=2687	12.5554
02496:3	5	K.VPGN[+2350.830]QTSTTLK.L	HexNAc(4)Hex(5)Fuc(1)NeuAc(2)	N[+2351]	1166.15	3	3496.44	3496.45	0	-1.6	668	Specific	213.33	73.46	73.46	3.79	22	>sp|P32004|L1CAM_HUMAN Neural cell adhesion molecule L1 OS=Homo sapiens OX=9606 GN=L1CAM PE=1 SV=2	3537	20210911_zy_cell_ethcd_2.2750.2750.3	controllerType=0 controllerNumber=1 scan=2750	12.8449
02517:3	39	K.AAIPSALDTN[+2026.687]SSK.S	HexNAc(2)Hex(10)	N[+2027]	1101.12	3	3301.34	3301.35	0	-0.5	542	Specific	215.12	126.64	126.64	4.07	6	>sp|Q08380|LG3BP_HUMAN Galectin-3-binding protein OS=Homo sapiens OX=9606 GN=LGALS3BP PE=1 SV=1	4876	20210911_zy_cell_ethcd_2.2773.2773.3	controllerType=0 controllerNumber=1 scan=2773	12.9481
02213:2	11	K.TN[+1864.634]ITLVC[+57.021]K.P	HexNAc(2)Hex(9)	C[+57], N[+1865]	1407.08	2	2813.15	2813.15	0	-0.6	580	Specific	215.97	122.24	122.24	4.32	13	>sp|P11717|MPRI_HUMAN Cation-independent mannose-6-phosphate receptor OS=Homo sapiens OX=9606 GN=IGF2R PE=1 SV=3	12317	20210911_zy_cell_ethcd_2.2439.2439.2	controllerType=0 controllerNumber=1 scan=2439	11.4189
00965:3	125	R.QRYPAN[+1702.581]C[+57.021]TVR.D	HexNAc(2)Hex(8)	C[+57], N[+1703]	989.738	3	2967.2	2967.2	0	-0.7	152	Specific	216.19	130.14	130.14	2.02	1	>sp|Q9BRN9|TM2D3_HUMAN TM2 domain-containing protein 3 OS=Homo sapiens OX=9606 GN=TM2D3 PE=2 SV=2	3267	20210911_zy_cell_ethcd_2.1068.1068.3	controllerType=0 controllerNumber=1 scan=1068	5.0853
01134:2	80	K.GPTN[+1702.581]NTC[+57.021]VVR.T	HexNAc(2)Hex(8)	C[+57], N[+1703]	1410.57	2	2820.12	2820.12	0	0.3	1438	Specific	216.53	85.05	85.05	4.08	3	>sp|Q8TEM1|PO210_HUMAN Nuclear pore membrane glycoprotein 210 OS=Homo sapiens OX=9606 GN=NUP210 PE=1 SV=3	3187	20210911_zy_cell_ethcd_2.1254.1254.2	controllerType=0 controllerNumber=1 scan=1254	5.9715
01124:2	80	K.GPTN[+1864.634]NTC[+57.021]VVR.T	HexNAc(2)Hex(9)	C[+57], N[+1865]	1491.59	2	2982.18	2982.18	0	0	1438	Specific	216.97	91.73	91.73	4.47	3	>sp|Q8TEM1|PO210_HUMAN Nuclear pore membrane glycoprotein 210 OS=Homo sapiens OX=9606 GN=NUP210 PE=1 SV=3	3187	20210911_zy_cell_ethcd_2.1243.1243.2	controllerType=0 controllerNumber=1 scan=1243	5.9194
00838:3	26	R.GN[+2424.867]VTQHVQGHR.N	HexNAc(5)Hex(6)Fuc(1)NeuAc(1)	N[+2425]	1219.83	3	3657.49	3657.49	0	-0.6	76	Specific	218.38	46.88	46.88	4.09	5	>sp|Q15043|S39AE_HUMAN Zinc transporter ZIP14 OS=Homo sapiens OX=9606 GN=SLC39A14 PE=1 SV=3	16204	20210911_zy_cell_ethcd_2.927.927.3	controllerType=0 controllerNumber=1 scan=927	4.4104
02460:2	3	R.VQPFN[+1581.555]VTQGK.Y	HexNAc(3)Hex(6)	N[+1582]	1350.08	2	2699.16	2699.16	0	0.2	352	Specific	218.62	119.3	119.3	4.08	24	>sp|P13473|LAMP2_HUMAN Lysosome-associated membrane glycoprotein 2 OS=Homo sapiens OX=9606 GN=LAMP2 PE=1 SV=2	6694	20210911_zy_cell_ethcd_2.2710.2710.2	controllerType=0 controllerNumber=1 scan=2710	12.6633
01087:2	68	R.N[+1864.634]VTWK.L	HexNAc(2)Hex(9)	N[+1865]	1256.5	2	2511.98	2511.99	0	-0.3	125	Specific	219.28	68.66	68.66	3.94	7	>sp|P50454|SERPH_HUMAN Serpin H1 OS=Homo sapiens OX=9606 GN=SERPINH1 PE=1 SV=2	16343	20210911_zy_cell_ethcd_2.1202.1202.2	controllerType=0 controllerNumber=1 scan=1202	5.726
02344:3	138	R.VAGN[+1872.651]HTQWYEVNR.V	HexNAc(3)Hex(6)NeuAc(1)	N[+1873]	1149.47	3	3446.4	3446.4	0	-0.9	122	Specific	219.97	3.1	3.1	1.91	1	>sp|A1L453|PRS38_HUMAN Serine protease 38 OS=Homo sapiens OX=9606 GN=PRSS38 PE=2 SV=2	13114	20210911_zy_cell_ethcd_2.2583.2583.3	controllerType=0 controllerNumber=1 scan=2583	12.0783
01143:3	8	R.TLSRPSETC[+57.021]N[+1378.476]ETTK.L	HexNAc(2)Hex(6)	C[+57], N[+1378]	1001.42	3	3002.24	3002.24	0	-1.3	384	Specific	220.73	93.94	93.94	4.69	10	>sp|Q96AY3|FKB10_HUMAN Peptidyl-prolyl cis-trans isomerase FKBP10 OS=Homo sapiens OX=9606 GN=FKBP10 PE=1 SV=1	19614	20210911_zy_cell_ethcd_2.1263.1263.3	controllerType=0 controllerNumber=1 scan=1263	6.0164
02348:3	14	R.EAGN[+2789.999]HTSGAGLVQINK.S	HexNAc(6)Hex(7)Fuc(1)NeuAc(1)	N[+2790]	1462.27	3	4384.81	4385.81	-1	-0.3	80	Specific	221.71	91.94	91.94	4.07	8	>sp|P20645|MPRD_HUMAN Cation-dependent mannose-6-phosphate receptor OS=Homo sapiens OX=9606 GN=M6PR PE=1 SV=1	11960	20210911_zy_cell_ethcd_2.2587.2587.3	controllerType=0 controllerNumber=1 scan=2587	12.0963
02762:3	36	R.EQIN[+1702.581]ITLDHR.C	HexNAc(2)Hex(8)	N[+1703]	981.081	3	2941.23	2941.23	0	-0.9	194	Specific	221.94	114.02	114.02	4.47	9	>sp|Q02809|PLOD1_HUMAN Procollagen-lysine,2-oxoglutarate 5-dioxygenase 1 OS=Homo sapiens OX=9606 GN=PLOD1 PE=1 SV=2	10199	20210911_zy_cell_ethcd_2.3042.3042.3	controllerType=0 controllerNumber=1 scan=3042	14.1759
03287:3	13	R.IAPASN[+1378.476]VSHTVVLRPLK.A	HexNAc(2)Hex(6)	N[+1378]	1060.85	3	3180.54	3180.54	0	-1	83	Specific	222.03	177.33	177.33	4.32	6	>sp|P43308|SSRB_HUMAN Translocon-associated protein subunit beta OS=Homo sapiens OX=9606 GN=SSR2 PE=1 SV=1	13071	20210911_zy_cell_ethcd_2.3619.3619.3	controllerType=0 controllerNumber=1 scan=3619	16.8104
02486:2	1	R.LLNINPN[+1727.613]K.T	HexNAc(3)Hex(6)Fuc(1)	N[+1728]	1327.08	2	2653.16	2653.16	0	-0.3	255	Specific	222.22	87.56	87.56	4.19	48	>sp|P11279|LAMP1_HUMAN Lysosome-associated membrane glycoprotein 1 OS=Homo sapiens OX=9606 GN=LAMP1 PE=1 SV=3	4405	20210911_zy_cell_ethcd_2.2739.2739.2	controllerType=0 controllerNumber=1 scan=2739	12.7945
02734:3	9	R.FTFTSHTPGEHQIC[+57.021]LHSN[+1540.529]STK.F	HexNAc(2)Hex(7)	C[+57], N[+1541]	1323.89	3	3969.65	3969.66	0	-1.2	108	Specific	222.38	173.29	173.29	4.15	5	>sp|Q9BVK6|TMED9_HUMAN Transmembrane emp24 domain-containing protein 9 OS=Homo sapiens OX=9606 GN=TMED9 PE=1 SV=2	14554	20210911_zy_cell_ethcd_2.3011.3011.3	controllerType=0 controllerNumber=1 scan=3011	14.0337
01569:3	39	R.DAGVVC[+57.021]TN[+1702.581]ETR.S	HexNAc(2)Hex(8)	C[+57], N[+1703]	975.384	3	2924.14	2924.13	0	1.3	118	Specific	222.64	136.08	136.08	2.42	6	>sp|Q08380|LG3BP_HUMAN Galectin-3-binding protein OS=Homo sapiens OX=9606 GN=LGALS3BP PE=1 SV=1	4876	20210911_zy_cell_ethcd_2.1732.1732.3	controllerType=0 controllerNumber=1 scan=1732	8.1936
03464:3	5	R.THN[+1913.677]LTDLSPHLR.Y	HexNAc(4)Hex(5)NeuAc(1)	N[+1914]	1106.47	3	3317.41	3317.42	0	-2	977	Specific	222.89	59.65	59.65	4.19	22	>sp|P32004|L1CAM_HUMAN Neural cell adhesion molecule L1 OS=Homo sapiens OX=9606 GN=L1CAM PE=1 SV=2	3537	20210911_zy_cell_ethcd_2.3813.3813.3	controllerType=0 controllerNumber=1 scan=3813	17.6966
02639:3	16	K.WGHN[+1540.529]ITEFQQR.F	HexNAc(2)Hex(7)	N[+1541]	986.073	3	2956.2	2956.21	0	-1.8	277	Specific	223.11	117.94	117.94	4.59	6	>sp|Q96HE7|ERO1A_HUMAN ERO1-like protein alpha OS=Homo sapiens OX=9606 GN=ERO1A PE=1 SV=2	2944	20210911_zy_cell_ethcd_2.2907.2907.3	controllerType=0 controllerNumber=1 scan=2907	13.5566
04823:3	24	R.TILVDNNTWN[+1540.529]NTHISR.V	HexNAc(2)Hex(7)	N[+1541]	1146.83	3	3438.48	3438.48	0	-0.8	539	Specific	226.29	150.05	74.86	4.72	4	>sp|P46977|STT3A_HUMAN Dolichyl-diphosphooligosaccharide--protein glycosyltransferase subunit STT3A OS=Homo sapiens OX=9606 GN=STT3A PE=1 SV=2	18762	20210911_zy_cell_ethcd_2.5307.5307.3	controllerType=0 controllerNumber=1 scan=5307	24.5202
03286:3	13	R.IAPASN[+1540.529]VSHTVVLRPLK.A	HexNAc(2)Hex(7)	N[+1541]	1114.87	3	3342.59	3342.59	0	-0.8	83	Specific	226.54	222.2	222.2	4.66	6	>sp|P43308|SSRB_HUMAN Translocon-associated protein subunit beta OS=Homo sapiens OX=9606 GN=SSR2 PE=1 SV=1	13071	20210911_zy_cell_ethcd_2.3618.3618.3	controllerType=0 controllerNumber=1 scan=3618	16.8056
02870:3	3	K.VASVININPN[+1768.640]TTHSTGSC[+57.021]R.S	HexNAc(4)Hex(5)Fuc(1)	C[+57], N[+1769]	1266.21	3	3796.63	3796.63	0	-0.7	248	Specific	227.5	163.38	163.38	4.68	24	>sp|P13473|LAMP2_HUMAN Lysosome-associated membrane glycoprotein 2 OS=Homo sapiens OX=9606 GN=LAMP2 PE=1 SV=2	6694	20210911_zy_cell_ethcd_2.3160.3160.3	controllerType=0 controllerNumber=1 scan=3160	14.7138
02313:3	1	R.LLNINPN[+2864.036]K.T	HexNAc(7)Hex(8)Fuc(1)	N[+2864]	1263.87	3	3789.58	3789.58	0	0.1	255	Specific	228.2	71.7	71.7	2.92	48	>sp|P11279|LAMP1_HUMAN Lysosome-associated membrane glycoprotein 1 OS=Homo sapiens OX=9606 GN=LAMP1 PE=1 SV=3	4405	20210911_zy_cell_ethcd_2.2549.2549.3	controllerType=0 controllerNumber=1 scan=2549	11.9246
03219:2	10	R.VFGSQN[+1864.634]LTTVK.L	HexNAc(2)Hex(9)	N[+1865]	1529.65	2	3058.29	3058.29	0	0	510	Specific	228.43	91.64	91.64	4.47	14	>sp|Q9Y4L1|HYOU1_HUMAN Hypoxia up-regulated protein 1 OS=Homo sapiens OX=9606 GN=HYOU1 PE=1 SV=1	14756	20210911_zy_cell_ethcd_2.3544.3544.2	controllerType=0 controllerNumber=1 scan=3544	16.4667
07850:3	44	R.LSAVNSIFLSHN[+2350.830]NTK.E	HexNAc(4)Hex(5)Fuc(1)NeuAc(2)	N[+2351]	1332.57	3	3995.7	3995.7	0	-0.2	442	Specific	228.91	123.22	123.22	4.72	6	>sp|P48960|CD97_HUMAN CD97 antigen OS=Homo sapiens OX=9606 GN=CD97 PE=1 SV=4	8146	20210911_zy_cell_ethcd_2.8701.8701.3	controllerType=0 controllerNumber=1 scan=8701	39.7215
04521:2	64	R.N[+1702.581]STIEAANLAGLK.I	HexNAc(2)Hex(8)	N[+1703]	1502.65	2	3004.29	3004.29	0	-0.1	184	Specific	229.95	193.09	193.09	4.67	2	>sp|P48723|HSP13_HUMAN Heat shock 70 kDa protein 13 OS=Homo sapiens OX=9606 GN=HSPA13 PE=1 SV=1	11660	20210911_zy_cell_ethcd_2.4974.4974.2	controllerType=0 controllerNumber=1 scan=4974	23.0095
07584:3	29	K.HQGAWYVWN[+2204.772]R.T	HexNAc(4)Hex(5)NeuAc(2)	N[+2205]	1174.47	3	3521.4	3521.4	0	-0.8	260	Specific	230.22	110.12	110.12	4.47	10	>sp|P09923|PPBI_HUMAN Intestinal-type alkaline phosphatase OS=Homo sapiens OX=9606 GN=ALPI PE=1 SV=2	15196	20210911_zy_cell_ethcd_2.8395.8395.3	controllerType=0 controllerNumber=1 scan=8395	38.3545
02062:2	51	R.TVN[+1540.529]VSVPK.K	HexNAc(2)Hex(7)	N[+1541]	1192.51	2	2384.02	2384.02	0	-0.6	89	Specific	230.27	122.02	122.02	4.32	5	>sp|Q96KA5|CLP1L_HUMAN Cleft lip and palate transmembrane protein 1-like protein OS=Homo sapiens OX=9606 GN=CLPTM1L PE=1 SV=1	1199	20210911_zy_cell_ethcd_2.2273.2273.2	controllerType=0 controllerNumber=1 scan=2273	10.6711
01531:3	4	K.NN[+1768.640]HTASILDR.M	HexNAc(4)Hex(5)Fuc(1)	N[+1769]	970.409	3	2909.21	2909.22	0	-0.8	129	Specific	230.49	104.26	104.26	4.47	21	>sp|P08962|CD63_HUMAN CD63 antigen OS=Homo sapiens OX=9606 GN=CD63 PE=1 SV=2	5151	20210911_zy_cell_ethcd_2.1690.1690.3	controllerType=0 controllerNumber=1 scan=1690	8.0036
03344:3	43	K.GQTEIQVNC[+57.021]PPAVTEN[+1540.529]K.T	HexNAc(2)Hex(7)	C[+57], N[+1541]	1142.48	3	3425.44	3425.44	0	-1	56	Specific	231.66	174.24	174.24	4.52	3	>sp|Q16563|SYPL1_HUMAN Synaptophysin-like protein 1 OS=Homo sapiens OX=9606 GN=SYPL1 PE=1 SV=1	16250	20210911_zy_cell_ethcd_2.3681.3681.3	controllerType=0 controllerNumber=1 scan=3681	17.0887
01105:3	8	R.TLSRPSETC[+57.021]N[+1540.529]ETTK.L	HexNAc(2)Hex(7)	C[+57], N[+1541]	1055.43	3	3164.29	3164.29	0	-1.7	384	Specific	232	115.61	115.61	4.69	10	>sp|Q96AY3|FKB10_HUMAN Peptidyl-prolyl cis-trans isomerase FKBP10 OS=Homo sapiens OX=9606 GN=FKBP10 PE=1 SV=1	19614	20210911_zy_cell_ethcd_2.1222.1222.3	controllerType=0 controllerNumber=1 scan=1222	5.8223
03338:3	13	R.IAPASN[+1864.634]VSHTVVLRPLK.A	HexNAc(2)Hex(9)	N[+1865]	1222.9	3	3666.69	3666.7	0	-1.4	83	Specific	232.19	187.59	187.59	4.71	6	>sp|P43308|SSRB_HUMAN Translocon-associated protein subunit beta OS=Homo sapiens OX=9606 GN=SSR2 PE=1 SV=1	13071	20210911_zy_cell_ethcd_2.3675.3675.3	controllerType=0 controllerNumber=1 scan=3675	17.0614
03684:2	7	K.IYIPLN[+1702.581]K.T	HexNAc(2)Hex(8)	N[+1703]	1282.06	2	2563.1	2563.11	0	-0.4	40	Specific	232.42	134.06	134.06	4.32	12	>sp|Q92542|NICA_HUMAN Nicastrin OS=Homo sapiens OX=9606 GN=NCSTN PE=1 SV=2	7240	20210911_zy_cell_ethcd_2.4055.4055.2	controllerType=0 controllerNumber=1 scan=4055	18.8053
02822:3	114	K.YRDFQHLLN[+2026.687]R.T	HexNAc(2)Hex(10)	N[+2027]	1130.14	3	3388.39	3388.39	0	-0.2	229	Specific	233.4	156.41	156.41	2.46	1	>sp|Q13444|ADA15_HUMAN Disintegrin and metalloproteinase domain-containing protein 15 OS=Homo sapiens OX=9606 GN=ADAM15 PE=1 SV=4	339	20210911_zy_cell_ethcd_2.3108.3108.3	controllerType=0 controllerNumber=1 scan=3108	14.4722
03349:3	1	R.LLNINPN[+2059.735]K.T	HexNAc(4)Hex(5)Fuc(1)NeuAc(1)	N[+2060]	995.764	3	2985.28	2985.28	0	-1	255	Specific	234.09	83.2	83.2	3.8	48	>sp|P11279|LAMP1_HUMAN Lysosome-associated membrane glycoprotein 1 OS=Homo sapiens OX=9606 GN=LAMP1 PE=1 SV=3	4405	20210911_zy_cell_ethcd_2.3687.3687.3	controllerType=0 controllerNumber=1 scan=3687	17.1134
01285:3	29	R.FNQC[+57.021]N[+2059.735]TTR.G	HexNAc(4)Hex(5)Fuc(1)NeuAc(1)	C[+57], N[+2060]	1034.07	3	3100.19	3100.19	0	-0.8	137	Specific	234.51	81.63	81.63	3.75	10	>sp|P09923|PPBI_HUMAN Intestinal-type alkaline phosphatase OS=Homo sapiens OX=9606 GN=ALPI PE=1 SV=2	15196	20210911_zy_cell_ethcd_2.1420.1420.3	controllerType=0 controllerNumber=1 scan=1420	6.7492
02689:3	19	R.EAIN[+1864.634]ITLDHK.C	HexNAc(2)Hex(9)	N[+1865]	1006.76	3	3018.25	3018.26	0	-0.6	206	Specific	235.29	109.81	109.81	4.47	8	>sp|O00469|PLOD2_HUMAN Procollagen-lysine,2-oxoglutarate 5-dioxygenase 2 OS=Homo sapiens OX=9606 GN=PLOD2 PE=1 SV=2	15649	20210911_zy_cell_ethcd_2.2962.2962.3	controllerType=0 controllerNumber=1 scan=2962	13.809
04456:3	120	K.VLGQSQEPNVNPASAGN[+2350.830]QTQK.T	HexNAc(4)Hex(5)Fuc(1)NeuAc(2)	N[+2351]	1506.97	3	4518.91	4517.9	1	0.4	153	Specific	235.31	154.44	45.66	2.21	1	>sp|Q5VW38|GP107_HUMAN Protein GPR107 OS=Homo sapiens OX=9606 GN=GPR107 PE=1 SV=1	8685	20210911_zy_cell_ethcd_2.4903.4903.3	controllerType=0 controllerNumber=1 scan=4903	22.6867
02966:3	25	R.KIPAIN[+1702.581]QTITEANEK.T	HexNAc(2)Hex(8)	N[+1703]	1124.84	3	3372.49	3372.49	0	-0.7	1390	Specific	236.18	147.13	147.13	4.72	10	>sp|P11047|LAMC1_HUMAN Laminin subunit gamma-1 OS=Homo sapiens OX=9606 GN=LAMC1 PE=1 SV=3	4746	20210911_zy_cell_ethcd_2.3266.3266.3	controllerType=0 controllerNumber=1 scan=3266	15.1957
04041:3	2	R.NPC[+57.021]TSEQN[+1872.651]C[+57.021]TSPFSYK.N	HexNAc(3)Hex(6)NeuAc(1)	C[+57]*2, N[+1873]	1264.81	3	3792.43	3792.44	0	-2.8	205	Specific	236.92	125.91	125.91	3.7	27	>sp|P05556|ITB1_HUMAN Integrin beta-1 OS=Homo sapiens OX=9606 GN=ITGB1 PE=1 SV=2	3061	20210911_zy_cell_ethcd_2.4446.4446.3	controllerType=0 controllerNumber=1 scan=4446	20.5715
03938:2	5	R.GYN[+1702.581]VTYWR.E	HexNAc(2)Hex(8)	N[+1703]	1381.05	2	2761.09	2761.09	0	-0.2	847	Specific	237.69	139.61	139.61	4.32	22	>sp|P32004|L1CAM_HUMAN Neural cell adhesion molecule L1 OS=Homo sapiens OX=9606 GN=L1CAM PE=1 SV=2	3537	20210911_zy_cell_ethcd_2.4334.4334.2	controllerType=0 controllerNumber=1 scan=4334	20.0622
03561:3	5	R.THN[+1710.598]LTDLSPHLR.Y	HexNAc(3)Hex(5)NeuAc(1)	N[+1711]	1038.78	3	3114.33	3114.34	0	-1.4	977	Specific	239.14	86.81	86.81	4.5	22	>sp|P32004|L1CAM_HUMAN Neural cell adhesion molecule L1 OS=Homo sapiens OX=9606 GN=L1CAM PE=1 SV=2	3537	20210911_zy_cell_ethcd_2.3920.3920.3	controllerType=0 controllerNumber=1 scan=3920	18.1844
02993:3	64	K.QRN[+1702.581]STIEAANLAGLK.I	HexNAc(2)Hex(8)	N[+1703]	1096.82	3	3288.44	3288.45	0	-1.8	182	Specific	239.5	126.51	126.51	4.34	2	>sp|P48723|HSP13_HUMAN Heat shock 70 kDa protein 13 OS=Homo sapiens OX=9606 GN=HSPA13 PE=1 SV=1	11660	20210911_zy_cell_ethcd_2.3296.3296.3	controllerType=0 controllerNumber=1 scan=3296	15.3382
01873:3	47	R.DLGPTLAN[+1378.476]STHHNVR.L	HexNAc(2)Hex(6)	N[+1378]	1004.11	3	3010.3	3010.3	0	0	302	Specific	240.04	60.87	60.87	5.07	4	>sp|P04062|GLCM_HUMAN Lysosomal acid glucosylceramidase OS=Homo sapiens OX=9606 GN=GBA PE=1 SV=3	6280	20210911_zy_cell_ethcd_2.2066.2066.3	controllerType=0 controllerNumber=1 scan=2066	9.7415
04243:4	9	R.FTFTSHTPGEHQIC[+57.021]LHSN[+2350.830]STK.F	HexNAc(4)Hex(5)Fuc(1)NeuAc(2)	C[+57], N[+2351]	1195.74	4	4779.96	4779.96	0	-0.5	108	Specific	240.8	176.97	176.97	5.6	5	>sp|Q9BVK6|TMED9_HUMAN Transmembrane emp24 domain-containing protein 9 OS=Homo sapiens OX=9606 GN=TMED9 PE=1 SV=2	14554	20210911_zy_cell_ethcd_2.4669.4669.4	controllerType=0 controllerNumber=1 scan=4669	21.6089
01840:3	10	R.AEPPLN[+1702.581]ASASDQGEK.V	HexNAc(2)Hex(8)	N[+1703]	1072.77	3	3216.29	3216.29	0	-0.9	926	Specific	243.3	197.14	197.14	4.89	14	>sp|Q9Y4L1|HYOU1_HUMAN Hypoxia up-regulated protein 1 OS=Homo sapiens OX=9606 GN=HYOU1 PE=1 SV=1	14756	20210911_zy_cell_ethcd_2.2030.2030.3	controllerType=0 controllerNumber=1 scan=2030	9.5786
02652:3	5	R.THN[+1378.476]LTDLSPHLR.Y	HexNAc(2)Hex(6)	N[+1378]	928.074	3	2782.21	2782.21	0	-2.4	977	Specific	243.67	94.04	94.04	4.58	22	>sp|P32004|L1CAM_HUMAN Neural cell adhesion molecule L1 OS=Homo sapiens OX=9606 GN=L1CAM PE=1 SV=2	3537	20210911_zy_cell_ethcd_2.2921.2921.4	controllerType=0 controllerNumber=1 scan=2921	13.6203
01424:2	14	K.PLFN[+1702.581]K.S	HexNAc(2)Hex(8)	N[+1703]	1160.97	2	2320.94	2320.94	0	-0.6	54	Specific	244.49	11.39	11.39	3.88	8	>sp|P20645|MPRD_HUMAN Cation-dependent mannose-6-phosphate receptor OS=Homo sapiens OX=9606 GN=M6PR PE=1 SV=1	11960	20210911_zy_cell_ethcd_2.1573.1573.2	controllerType=0 controllerNumber=1 scan=1573	7.4674
01407:3	4	K.NN[+2676.952]HTASILDR.M	HexNAc(6)Hex(9)	N[+2677]	1273.18	3	3817.53	3817.53	0	-0.3	129	Specific	245.54	160.25	160.25	5.55	21	>sp|P08962|CD63_HUMAN CD63 antigen OS=Homo sapiens OX=9606 GN=CD63 PE=1 SV=2	5151	20210911_zy_cell_ethcd_2.1554.1554.3	controllerType=0 controllerNumber=1 scan=1554	7.3804
04525:2	64	R.N[+1702.581]STIEAANLAGLK.I	HexNAc(2)Hex(8)	N[+1703]	1502.65	2	3004.28	3004.29	0	-1.2	184	Specific	245.61	194.7	194.7	5.79	2	>sp|P48723|HSP13_HUMAN Heat shock 70 kDa protein 13 OS=Homo sapiens OX=9606 GN=HSPA13 PE=1 SV=1	11660	20210911_zy_cell_ethcd_2.4979.4979.2	controllerType=0 controllerNumber=1 scan=4979	23.0311
01893:3	7	R.RPN[+1702.581]QSQPLPPSSLQR.F	HexNAc(2)Hex(8)	N[+1703]	1136.5	3	3407.49	3407.5	0	-0.5	415	Specific	246.19	158.1	158.1	5.11	12	>sp|Q92542|NICA_HUMAN Nicastrin OS=Homo sapiens OX=9606 GN=NCSTN PE=1 SV=2	7240	20210911_zy_cell_ethcd_2.2088.2088.3	controllerType=0 controllerNumber=1 scan=2088	9.8394
01064:3	40	R.RPSTAN[+2100.761]VTR.A	HexNAc(5)Hex(4)Fuc(1)NeuAc(1)	N[+2101]	1034.77	3	3102.31	3102.31	0	-0.9	92	Specific	247.61	85.94	85.94	5.02	6	>sp|P0CW18|PRS56_HUMAN Serine protease 56 OS=Homo sapiens OX=9606 GN=PRSS56 PE=1 SV=1	12249	20210911_zy_cell_ethcd_2.1177.1177.3	controllerType=0 controllerNumber=1 scan=1177	5.606
03733:3	3	K.VASVININPN[+2424.867]TTHSTGSC[+57.021]R.S	HexNAc(5)Hex(6)Fuc(1)NeuAc(1)	C[+57], N[+2425]	1484.96	3	4452.86	4452.86	0	0	248	Specific	247.63	122.28	122.28	6.31	24	>sp|P13473|LAMP2_HUMAN Lysosome-associated membrane glycoprotein 2 OS=Homo sapiens OX=9606 GN=LAMP2 PE=1 SV=2	6694	20210911_zy_cell_ethcd_2.4109.4109.3	controllerType=0 controllerNumber=1 scan=4109	19.0509
02507:2	1	R.LLNINPN[+1768.640]K.T	HexNAc(4)Hex(5)Fuc(1)	N[+1769]	1347.6	2	2694.19	2694.19	0	-0.3	255	Specific	249.42	88.34	88.34	5.09	48	>sp|P11279|LAMP1_HUMAN Lysosome-associated membrane glycoprotein 1 OS=Homo sapiens OX=9606 GN=LAMP1 PE=1 SV=3	4405	20210911_zy_cell_ethcd_2.2762.2762.2	controllerType=0 controllerNumber=1 scan=2762	12.8982
07450:3	20	R.TTLVDNNTWN[+2026.687]NSHIALVGK.A	HexNAc(2)Hex(10)	N[+2027]	1375.26	3	4123.76	4123.76	0	-0.4	618	Specific	252.96	175.17	95.21	6.26	7	>sp|Q8TCJ2|STT3B_HUMAN Dolichyl-diphosphooligosaccharide--protein glycosyltransferase subunit STT3B OS=Homo sapiens OX=9606 GN=STT3B PE=1 SV=1	13685	20210911_zy_cell_ethcd_2.8241.8241.3	controllerType=0 controllerNumber=1 scan=8241	37.6739
01890:3	7	R.RPN[+1702.581]QSQPLPPSSLQR.F	HexNAc(2)Hex(8)	N[+1703]	1136.5	3	3407.49	3407.5	0	-1.4	415	Specific	253.01	174.58	174.58	5.19	12	>sp|Q92542|NICA_HUMAN Nicastrin OS=Homo sapiens OX=9606 GN=NCSTN PE=1 SV=2	7240	20210911_zy_cell_ethcd_2.2084.2084.3	controllerType=0 controllerNumber=1 scan=2084	9.8238
02547:2	58	R.N[+1702.581]TTIFLK.F	HexNAc(2)Hex(8)	N[+1703]	1270.04	2	2539.07	2539.07	0	-0.8	62	Specific	253.7	150.66	150.66	5.26	3	>sp|Q8NBN3|TM87A_HUMAN Transmembrane protein 87A OS=Homo sapiens OX=9606 GN=TMEM87A PE=1 SV=3	19278	20210911_zy_cell_ethcd_2.2806.2806.2	controllerType=0 controllerNumber=1 scan=2806	13.099
02612:3	5	R.THN[+2026.687]LTDLSPHLR.Y	HexNAc(2)Hex(10)	N[+2027]	1144.15	3	3430.42	3430.43	0	-0.5	977	Specific	254.28	91.07	91.07	5.33	22	>sp|P32004|L1CAM_HUMAN Neural cell adhesion molecule L1 OS=Homo sapiens OX=9606 GN=L1CAM PE=1 SV=2	3537	20210911_zy_cell_ethcd_2.2877.2877.3	controllerType=0 controllerNumber=1 scan=2877	13.4238
02363:3	18	R.DN[+1864.634]ATLQATLHAAR.D	HexNAc(2)Hex(9)	N[+1865]	1082.79	3	3246.35	3246.35	0	-0.4	2422	Specific	254.35	141.21	141.21	5.7	8	>sp|O15230|LAMA5_HUMAN Laminin subunit alpha-5 OS=Homo sapiens OX=9606 GN=LAMA5 PE=1 SV=8	2334	20210911_zy_cell_ethcd_2.2604.2604.3	controllerType=0 controllerNumber=1 scan=2604	12.1747
02663:3	5	R.THN[+1581.555]LTDLSPHLR.Y	HexNAc(3)Hex(6)	N[+1582]	995.769	3	2985.29	2985.29	0	-0.3	977	Specific	254.51	117.89	117.89	5.33	22	>sp|P32004|L1CAM_HUMAN Neural cell adhesion molecule L1 OS=Homo sapiens OX=9606 GN=L1CAM PE=1 SV=2	3537	20210911_zy_cell_ethcd_2.2933.2933.3	controllerType=0 controllerNumber=1 scan=2933	13.6752
01089:3	8	R.TLSRPSETC[+57.021]N[+1702.581]ETTK.L	HexNAc(2)Hex(8)	C[+57], N[+1703]	1109.45	3	3326.34	3326.35	0	-0.9	384	Specific	254.95	151.06	151.06	5.7	10	>sp|Q96AY3|FKB10_HUMAN Peptidyl-prolyl cis-trans isomerase FKBP10 OS=Homo sapiens OX=9606 GN=FKBP10 PE=1 SV=1	19614	20210911_zy_cell_ethcd_2.1204.1204.3	controllerType=0 controllerNumber=1 scan=1204	5.7369
03662:2	7	K.IYIPLN[+1864.634]K.T	HexNAc(2)Hex(9)	N[+1865]	1363.08	2	2725.16	2725.16	0	-0.6	40	Specific	254.96	167.37	167.37	5.21	12	>sp|Q92542|NICA_HUMAN Nicastrin OS=Homo sapiens OX=9606 GN=NCSTN PE=1 SV=2	7240	20210911_zy_cell_ethcd_2.4031.4031.2	controllerType=0 controllerNumber=1 scan=4031	18.6933
06451:3	78	R.HLYTTTGGETDFTN[+2026.687]VTSLR.G	HexNAc(2)Hex(10)	N[+2027]	1380.57	3	4139.7	4139.71	0	-0.8	393	Specific	255.38	194.12	194.12	6.26	1	>sp|Q99523|SORT_HUMAN Sortilin OS=Homo sapiens OX=9606 GN=SORT1 PE=1 SV=3	15998	20210911_zy_cell_ethcd_2.7103.7103.3	controllerType=0 controllerNumber=1 scan=7103	32.6414
01703:3	28	K.EQYIHEN[+1540.529]YSR.A	HexNAc(2)Hex(7)	N[+1541]	960.382	3	2879.13	2879.14	0	-1.7	542	Specific	257.46	164.49	164.49	5.69	5	>sp|O60568|PLOD3_HUMAN Multifunctional procollagen lysine hydroxylase and glycosyltransferase LH3 OS=Homo sapiens OX=9606 GN=PLOD3 PE=1 SV=1	10856	20210911_zy_cell_ethcd_2.1879.1879.3	controllerType=0 controllerNumber=1 scan=1879	8.8778
01574:2	3	R.LN[+1913.677]SSTIK.Y	HexNAc(4)Hex(5)NeuAc(1)	N[+1914]	1338.56	2	2676.11	2676.11	0	0.4	274	Specific	258.04	0.1	0.1	3.7	24	>sp|P13473|LAMP2_HUMAN Lysosome-associated membrane glycoprotein 2 OS=Homo sapiens OX=9606 GN=LAMP2 PE=1 SV=2	6694	20210911_zy_cell_ethcd_2.1737.1737.2	controllerType=0 controllerNumber=1 scan=1737	8.2181
04075:3	57	K.GRDIYTFDGALN[+1702.581]K.S	HexNAc(2)Hex(8)	N[+1703]	1058.11	3	3172.32	3172.32	0	-0.4	62	Specific	258.34	157.68	157.68	5.15	2	>sp|Q08722|CD47_HUMAN Leukocyte surface antigen CD47 OS=Homo sapiens OX=9606 GN=CD47 PE=1 SV=1	886	20210911_zy_cell_ethcd_2.4484.4484.3	controllerType=0 controllerNumber=1 scan=4484	20.7404
01851:2	10	R.AEPPLN[+1378.476]ASASDQGEK.V	HexNAc(2)Hex(6)	N[+1378]	1446.6	2	2892.19	2892.19	0	-0.1	926	Specific	259.16	168.89	168.89	5.65	14	>sp|Q9Y4L1|HYOU1_HUMAN Hypoxia up-regulated protein 1 OS=Homo sapiens OX=9606 GN=HYOU1 PE=1 SV=1	14756	20210911_zy_cell_ethcd_2.2042.2042.2	controllerType=0 controllerNumber=1 scan=2042	9.6329
01179:3	1	R.KDN[+2715.963]TTVTR.L	HexNAc(5)Hex(6)Fuc(1)NeuAc(2)	N[+2716]	1217.49	3	3650.45	3650.46	0	-0.9	247	Specific	261.45	65.28	65.28	4.74	48	>sp|P11279|LAMP1_HUMAN Lysosome-associated membrane glycoprotein 1 OS=Homo sapiens OX=9606 GN=LAMP1 PE=1 SV=3	4405	20210911_zy_cell_ethcd_2.1303.1303.3	controllerType=0 controllerNumber=1 scan=1303	6.1976
02173:3	54	K.HLLEN[+1540.529]STASVSEAER.K	HexNAc(2)Hex(7)	N[+1541]	1061.78	3	3183.33	3183.33	0	-1	162	Specific	262.51	153.62	153.62	5.7	2	>sp|P42892|ECE1_HUMAN Endothelin-converting enzyme 1 OS=Homo sapiens OX=9606 GN=ECE1 PE=1 SV=2	4441	20210911_zy_cell_ethcd_2.2395.2395.3	controllerType=0 controllerNumber=1 scan=2395	11.2266
02415:3	1	R.LLNINPN[+2133.772]K.T	HexNAc(5)Hex(6)Fuc(1)	N[+2134]	1020.44	3	3059.32	3059.32	0	-1	255	Specific	263.59	139.56	139.56	4.52	48	>sp|P11279|LAMP1_HUMAN Lysosome-associated membrane glycoprotein 1 OS=Homo sapiens OX=9606 GN=LAMP1 PE=1 SV=3	4405	20210911_zy_cell_ethcd_2.2661.2661.3	controllerType=0 controllerNumber=1 scan=2661	12.4377
01808:2	6	R.N[+1540.529]TTFNVESTK.K	HexNAc(2)Hex(7)	N[+1541]	1341.05	2	2681.08	2681.08	0	0.6	418	Specific	264.21	191.23	191.23	5.06	15	>sp|P56199|ITA1_HUMAN Integrin alpha-1 OS=Homo sapiens OX=9606 GN=ITGA1 PE=1 SV=2	9701	20210911_zy_cell_ethcd_2.1995.1995.2	controllerType=0 controllerNumber=1 scan=1995	9.4177
01487:2	65	K.N[+1540.529]FTMNEK.L	HexNAc(2)Hex(7)	N[+1541]	1212.47	2	2423.92	2423.93	0	-0.8	203	Specific	264.21	150.78	150.78	5.26	4	>sp|Q92820|GGH_HUMAN Gamma-glutamyl hydrolase OS=Homo sapiens OX=9606 GN=GGH PE=1 SV=2	3562	20210911_zy_cell_ethcd_2.1642.1642.2	controllerType=0 controllerNumber=1 scan=1642	7.7867
02883:3	47	R.DLGPTLAN[+2350.830]STHHNVR.L	HexNAc(4)Hex(5)Fuc(1)NeuAc(2)	N[+2351]	1328.22	3	3982.65	3982.66	0	-0.3	302	Specific	264.48	49.33	49.33	5.07	4	>sp|P04062|GLCM_HUMAN Lysosomal acid glucosylceramidase OS=Homo sapiens OX=9606 GN=GBA PE=1 SV=3	6280	20210911_zy_cell_ethcd_2.3175.3175.3	controllerType=0 controllerNumber=1 scan=3175	14.7799
01995:3	30	K.HTNMN[+1540.529]LTQLK.V	HexNAc(2)Hex(7)	N[+1541]	914.054	3	2740.15	2740.15	0	-0.6	250	Specific	264.62	136.2	136.2	5.6	6	>sp|Q15165|PON2_HUMAN Serum paraoxonase/arylesterase 2 OS=Homo sapiens OX=9606 GN=PON2 PE=1 SV=4	9244	20210911_zy_cell_ethcd_2.2200.2200.3	controllerType=0 controllerNumber=1 scan=2200	10.3431
03000:3	25	R.KIPAIN[+1540.529]QTITEANEK.T	HexNAc(2)Hex(7)	N[+1541]	1070.82	3	3210.44	3210.44	0	-0.2	1390	Specific	266.64	191.81	191.81	5.65	10	>sp|P11047|LAMC1_HUMAN Laminin subunit gamma-1 OS=Homo sapiens OX=9606 GN=LAMC1 PE=1 SV=3	4746	20210911_zy_cell_ethcd_2.3303.3303.3	controllerType=0 controllerNumber=1 scan=3303	15.3723
01773:2	21	K.N[+1216.423]QSVPLSC[+57.021]C[+57.021]R.E	HexNAc(2)Hex(5)	C[+57]*2, N[+1216]	1218.99	2	2436.97	2436.97	0	-1	167	Specific	267.83	215.96	215.96	5.63	7	>sp|O60637|TSN3_HUMAN Tetraspanin-3 OS=Homo sapiens OX=9606 GN=TSPAN3 PE=2 SV=1	16532	20210911_zy_cell_ethcd_2.1956.1956.2	controllerType=0 controllerNumber=1 scan=1956	9.2356
02377:2	1	R.LLNINPN[+1864.634]K.T	HexNAc(2)Hex(9)	N[+1865]	1395.59	2	2790.18	2790.18	0	0.5	255	Specific	268.42	149.37	149.37	4.79	48	>sp|P11279|LAMP1_HUMAN Lysosome-associated membrane glycoprotein 1 OS=Homo sapiens OX=9606 GN=LAMP1 PE=1 SV=3	4405	20210911_zy_cell_ethcd_2.2619.2619.2	controllerType=0 controllerNumber=1 scan=2619	12.2425
02527:3	34	R.VTPAC[+57.021]N[+2059.735]TSLPAQR.W	HexNAc(4)Hex(5)Fuc(1)NeuAc(1)	C[+57], N[+2060]	1158.82	3	3474.44	3474.45	0	-1.3	64	Specific	268.65	87.65	87.65	4.91	11	>sp|Q9UBG0|MRC2_HUMAN C-type mannose receptor 2 OS=Homo sapiens OX=9606 GN=MRC2 PE=1 SV=2	16756	20210911_zy_cell_ethcd_2.2784.2784.3	controllerType=0 controllerNumber=1 scan=2784	12.9975
02457:2	1	R.LLNINPN[+1581.555]K.T	HexNAc(3)Hex(6)	N[+1582]	1254.05	2	2507.1	2507.1	0	-0.2	255	Specific	269.16	143.76	143.76	5.26	48	>sp|P11279|LAMP1_HUMAN Lysosome-associated membrane glycoprotein 1 OS=Homo sapiens OX=9606 GN=LAMP1 PE=1 SV=3	4405	20210911_zy_cell_ethcd_2.2707.2707.2	controllerType=0 controllerNumber=1 scan=2707	12.6479
03773:3	3	K.VASVININPN[+2018.708]TTHSTGSC[+57.021]R.S	HexNAc(3)Hex(6)Fuc(1)NeuAc(1)	C[+57], N[+2019]	1349.57	3	4046.7	4046.7	0	0.4	248	Specific	269.28	131.57	131.57	5.82	24	>sp|P13473|LAMP2_HUMAN Lysosome-associated membrane glycoprotein 2 OS=Homo sapiens OX=9606 GN=LAMP2 PE=1 SV=2	6694	20210911_zy_cell_ethcd_2.4153.4153.3	controllerType=0 controllerNumber=1 scan=4153	19.254
01144:3	1	R.KDN[+2350.830]TTVTR.L	HexNAc(4)Hex(5)Fuc(1)NeuAc(2)	N[+2351]	1095.78	3	3285.32	3285.33	0	-0.8	247	Specific	269.34	76.31	76.31	4	48	>sp|P11279|LAMP1_HUMAN Lysosome-associated membrane glycoprotein 1 OS=Homo sapiens OX=9606 GN=LAMP1 PE=1 SV=3	4405	20210911_zy_cell_ethcd_2.1265.1265.3	controllerType=0 controllerNumber=1 scan=1265	6.0223
02569:2	95	R.VIYN[+1702.581]LTEK.G	HexNAc(2)Hex(8)	N[+1703]	1341.57	2	2682.13	2682.13	0	-0.6	425	Specific	269.67	122.01	122.01	5.26	1	>sp|Q969V3|NCLN_HUMAN Nicalin OS=Homo sapiens OX=9606 GN=NCLN PE=1 SV=2	10863	20210911_zy_cell_ethcd_2.2830.2830.2	controllerType=0 controllerNumber=1 scan=2830	13.2108
04035:3	15	R.N[+1702.581]HSIFLADINQER.G	HexNAc(2)Hex(8)	N[+1703]	1087.12	3	3259.36	3259.36	0	-1.2	197	Specific	270.09	168.14	168.14	5.79	6	>sp|P50897|PPT1_HUMAN Palmitoyl-protein thioesterase 1 OS=Homo sapiens OX=9606 GN=PPT1 PE=1 SV=1	7591	20210911_zy_cell_ethcd_2.4440.4440.3	controllerType=0 controllerNumber=1 scan=4440	20.5404
01074:3	1	R.KDN[+2350.830]TTVTR.L	HexNAc(4)Hex(5)Fuc(1)NeuAc(2)	N[+2351]	1095.78	3	3285.32	3285.33	0	-1.2	247	Specific	272.08	72.78	72.78	4.87	48	>sp|P11279|LAMP1_HUMAN Lysosome-associated membrane glycoprotein 1 OS=Homo sapiens OX=9606 GN=LAMP1 PE=1 SV=3	4405	20210911_zy_cell_ethcd_2.1188.1188.3	controllerType=0 controllerNumber=1 scan=1188	5.6569
04067:3	15	R.N[+1540.529]HSIFLADINQER.G	HexNAc(2)Hex(7)	N[+1541]	1033.11	3	3097.3	3097.31	0	-2.2	197	Specific	272.09	148.6	148.6	5.84	6	>sp|P50897|PPT1_HUMAN Palmitoyl-protein thioesterase 1 OS=Homo sapiens OX=9606 GN=PPT1 PE=1 SV=1	7591	20210911_zy_cell_ethcd_2.4475.4475.3	controllerType=0 controllerNumber=1 scan=4475	20.7027
00802:3	36	K.YIHQN[+1702.581]YTK.A	HexNAc(2)Hex(8)	N[+1703]	923.708	3	2769.11	2769.11	0	-0.8	534	Specific	272.75	138.81	138.81	5.26	9	>sp|Q02809|PLOD1_HUMAN Procollagen-lysine,2-oxoglutarate 5-dioxygenase 1 OS=Homo sapiens OX=9606 GN=PLOD1 PE=1 SV=2	10199	20210911_zy_cell_ethcd_2.888.888.3	controllerType=0 controllerNumber=1 scan=888	4.2321
04537:3	5	R.THN[+2350.830]LTDLSPHLR.Y	HexNAc(4)Hex(5)Fuc(1)NeuAc(2)	N[+2351]	1252.19	3	3754.57	3754.57	0	0.3	977	Specific	272.82	54.5	54.5	4.51	22	>sp|P32004|L1CAM_HUMAN Neural cell adhesion molecule L1 OS=Homo sapiens OX=9606 GN=L1CAM PE=1 SV=2	3537	20210911_zy_cell_ethcd_2.4992.4992.3	controllerType=0 controllerNumber=1 scan=4992	23.0881
02101:2	60	R.N[+1864.634]WTITR.L	HexNAc(2)Hex(9)	N[+1865]	1328.03	2	2655.05	2655.05	0	-0.4	651	Specific	273.16	87.84	87.84	5.09	5	>sp|P19022|CADH2_HUMAN Cadherin-2 OS=Homo sapiens OX=9606 GN=CDH2 PE=1 SV=4	1389	20210911_zy_cell_ethcd_2.2316.2316.2	controllerType=0 controllerNumber=1 scan=2316	10.8724
07712:3	76	R.N[+1702.581]C[+57.021]SAAPQPEPAAGLASYPELR.L	HexNAc(2)Hex(8)	C[+57], N[+1703]	1301.21	3	3901.63	3901.63	0	-0.8	87	Specific	277.07	236.87	236.87	5.01	2	>sp|O75718|CRTAP_HUMAN Cartilage-associated protein OS=Homo sapiens OX=9606 GN=CRTAP PE=1 SV=1	8728	20210911_zy_cell_ethcd_2.8543.8543.3	controllerType=0 controllerNumber=1 scan=8543	39.0162
01775:3	7	K.PIN[+1864.634]TTGTLKPDDR.V	HexNAc(2)Hex(9)	N[+1865]	1098.13	3	3292.38	3292.38	0	-0.7	262	Specific	277.65	143.88	143.88	5.7	12	>sp|Q92542|NICA_HUMAN Nicastrin OS=Homo sapiens OX=9606 GN=NCSTN PE=1 SV=2	7240	20210911_zy_cell_ethcd_2.1958.1958.3	controllerType=0 controllerNumber=1 scan=1958	9.2456
03501:2	89	R.NYFLVN[+1702.581]GTSR.E	HexNAc(2)Hex(8)	N[+1703]	1437.09	2	2873.17	2873.17	0	0.3	190	Specific	279.28	119.92	119.92	4.94	3	>sp|P15509|CSF2R_HUMAN Granulocyte-macrophage colony-stimulating factor receptor subunit alpha OS=Homo sapiens OX=9606 GN=CSF2RA PE=1 SV=1	5252	20210911_zy_cell_ethcd_2.3854.3854.3	controllerType=0 controllerNumber=1 scan=3854	17.8848
05579:3	37	K.GELN[+1540.529]TSIFSSRPIDK.F	HexNAc(2)Hex(7)	N[+1541]	1068.8	3	3204.39	3204.39	0	-0.6	350	Specific	279.53	135.51	135.51	5.7	5	>sp|Q9UHG3|PCYOX_HUMAN Prenylcysteine oxidase 1 OS=Homo sapiens OX=9606 GN=PCYOX1 PE=1 SV=3	9384	20210911_zy_cell_ethcd_2.6141.6141.3	controllerType=0 controllerNumber=1 scan=6141	28.2783
03743:3	3	K.VASVININPN[+1872.651]TTHSTGSC[+57.021]R.S	HexNAc(3)Hex(6)NeuAc(1)	C[+57], N[+1873]	1300.88	3	3900.64	3900.64	0	-2.1	248	Specific	279.9	110.69	110.69	6.28	24	>sp|P13473|LAMP2_HUMAN Lysosome-associated membrane glycoprotein 2 OS=Homo sapiens OX=9606 GN=LAMP2 PE=1 SV=2	6694	20210911_zy_cell_ethcd_2.4120.4120.3	controllerType=0 controllerNumber=1 scan=4120	19.1041
04149:3	32	K.C[+57.021]NM[+15.995]IN[+1702.581]GTDGDSFHPLITK.D	HexNAc(2)Hex(8)	C[+57], M[+16], N[+1703]	1246.84	3	3738.51	3738.5	0	0.7	245	Specific	280.9	228.48	228.48	5.92	4	>sp|Q14108|SCRB2_HUMAN Lysosome membrane protein 2 OS=Homo sapiens OX=9606 GN=SCARB2 PE=1 SV=2	18342	20210911_zy_cell_ethcd_2.4565.4565.3	controllerType=0 controllerNumber=1 scan=4565	21.1206
02405:2	1	R.LLNINPN[+1540.529]K.T	HexNAc(2)Hex(7)	N[+1541]	1233.54	2	2466.08	2466.08	0	0	255	Specific	280.98	168.82	168.82	4.81	48	>sp|P11279|LAMP1_HUMAN Lysosome-associated membrane glycoprotein 1 OS=Homo sapiens OX=9606 GN=LAMP1 PE=1 SV=3	4405	20210911_zy_cell_ethcd_2.2650.2650.2	controllerType=0 controllerNumber=1 scan=2650	12.3849
07722:3	29	K.HQGAWYVWN[+2204.772]R.T	HexNAc(4)Hex(5)NeuAc(2)	N[+2205]	1174.47	3	3521.4	3521.4	0	-1.1	260	Specific	281.59	142.72	142.72	5.67	10	>sp|P09923|PPBI_HUMAN Intestinal-type alkaline phosphatase OS=Homo sapiens OX=9606 GN=ALPI PE=1 SV=2	15196	20210911_zy_cell_ethcd_2.8554.8554.3	controllerType=0 controllerNumber=1 scan=8554	39.0682
04515:4	94	R.FTFTSHTPGDHQIC[+57.021]LHSN[+2350.830]STR.M	HexNAc(4)Hex(5)Fuc(1)NeuAc(2)	C[+57], N[+2351]	1199.24	4	4793.95	4793.95	0	0.4	100	Specific	282.07	210.93	210.93	5.27	1	>sp|Q7Z7H5|TMED4_HUMAN Transmembrane emp24 domain-containing protein 4 OS=Homo sapiens OX=9606 GN=TMED4 PE=1 SV=1	14145	20210911_zy_cell_ethcd_2.4968.4968.4	controllerType=0 controllerNumber=1 scan=4968	22.9823
03307:3	13	R.IAPASN[+1702.581]VSHTVVLRPLK.A	HexNAc(2)Hex(8)	N[+1703]	1168.89	3	3504.64	3504.65	0	-1.2	83	Specific	282.51	219.96	219.96	5.85	6	>sp|P43308|SSRB_HUMAN Translocon-associated protein subunit beta OS=Homo sapiens OX=9606 GN=SSR2 PE=1 SV=1	13071	20210911_zy_cell_ethcd_2.3641.3641.3	controllerType=0 controllerNumber=1 scan=3641	16.9082
03313:3	5	R.THN[+2059.735]LTDLSPHLR.Y	HexNAc(4)Hex(5)Fuc(1)NeuAc(1)	N[+2060]	1155.16	3	3463.46	3463.47	0	-2.9	977	Specific	283.84	127.06	127.06	4.81	22	>sp|P32004|L1CAM_HUMAN Neural cell adhesion molecule L1 OS=Homo sapiens OX=9606 GN=L1CAM PE=1 SV=2	3537	20210911_zy_cell_ethcd_2.3647.3647.3	controllerType=0 controllerNumber=1 scan=3647	16.9394
03389:3	5	R.THN[+2059.735]LTDLSPHLR.Y	HexNAc(4)Hex(5)Fuc(1)NeuAc(1)	N[+2060]	1155.16	3	3463.47	3463.47	0	0	977	Specific	283.88	91.75	91.75	4.54	22	>sp|P32004|L1CAM_HUMAN Neural cell adhesion molecule L1 OS=Homo sapiens OX=9606 GN=L1CAM PE=1 SV=2	3537	20210911_zy_cell_ethcd_2.3731.3731.3	controllerType=0 controllerNumber=1 scan=3731	17.318
03190:3	1	R.GHTLTLN[+2188.740]FTR.N	HexNAc(2)Hex(11)	N[+2189]	1116.79	3	3348.36	3348.36	0	-1.1	97	Specific	285.19	158.05	158.05	5.81	48	>sp|P11279|LAMP1_HUMAN Lysosome-associated membrane glycoprotein 1 OS=Homo sapiens OX=9606 GN=LAMP1 PE=1 SV=3	4405	20210911_zy_cell_ethcd_2.3512.3512.3	controllerType=0 controllerNumber=1 scan=3512	16.3216
03034:2	69	K.N[+1702.581]VSC[+57.021]LWC[+57.021]NTNK.A	HexNAc(2)Hex(8)	C[+57]*2, N[+1703]	1549.6	2	3098.2	3098.2	0	-0.2	54	Specific	286.19	239.04	239.04	5.7	2	>sp|P53801|PTTG_HUMAN Pituitary tumor-transforming gene 1 protein-interacting protein OS=Homo sapiens OX=9606 GN=PTTG1IP PE=1 SV=1	15135	20210911_zy_cell_ethcd_2.3341.3341.2	controllerType=0 controllerNumber=1 scan=3341	15.5408
04454:3	81	K.QLVHSFAEGQDQGSAYAN[+2350.830]R.T	HexNAc(4)Hex(5)Fuc(1)NeuAc(2)	N[+2351]	1476.94	3	4428.8	4428.8	0	0.9	74	Specific	286.37	194.95	194.95	5.84	2	>sp|Q5ZPR3|CD276_HUMAN CD276 antigen OS=Homo sapiens OX=9606 GN=CD276 PE=1 SV=1	1114	20210911_zy_cell_ethcd_2.4901.4901.3	controllerType=0 controllerNumber=1 scan=4901	22.6773
01296:2	84	K.VN[+1702.581]NTAVIEK.Q	HexNAc(2)Hex(8)	N[+1703]	1345.57	2	2690.13	2690.13	0	-0.4	550	Specific	288.32	113.24	113.24	5.5	2	>sp|Q9H330|TM245_HUMAN Transmembrane protein 245 OS=Homo sapiens OX=9606 GN=TMEM245 PE=1 SV=3	16010	20210911_zy_cell_ethcd_2.1432.1432.2	controllerType=0 controllerNumber=1 scan=1432	6.8044
02963:3	2	K.LRNPC[+57.021]TSEQN[+1702.581]C[+57.021]TSPFSYK.N	HexNAc(2)Hex(8)	C[+57]*2, N[+1703]	1297.86	3	3891.56	3891.56	0	0.7	203	Specific	288.38	210.94	210.94	5.36	27	>sp|P05556|ITB1_HUMAN Integrin beta-1 OS=Homo sapiens OX=9606 GN=ITGB1 PE=1 SV=2	3061	20210911_zy_cell_ethcd_2.3263.3263.3	controllerType=0 controllerNumber=1 scan=3263	15.1816
01979:2	25	R.VN[+1378.476]NTLSSQISR.L	HexNAc(2)Hex(6)	N[+1378]	1299.06	2	2597.12	2597.12	0	0.4	1106	Specific	288.74	158.36	158.36	5.18	10	>sp|P11047|LAMC1_HUMAN Laminin subunit gamma-1 OS=Homo sapiens OX=9606 GN=LAMC1 PE=1 SV=3	4746	20210911_zy_cell_ethcd_2.2182.2182.2	controllerType=0 controllerNumber=1 scan=2182	10.2624
01806:2	19	R.YN[+1378.476]C[+57.021]SIESPR.K	HexNAc(2)Hex(6)	C[+57], N[+1378]	1252.49	2	2503.97	2503.97	0	-0.6	695	Specific	288.86	134.11	134.11	5.67	8	>sp|O00469|PLOD2_HUMAN Procollagen-lysine,2-oxoglutarate 5-dioxygenase 2 OS=Homo sapiens OX=9606 GN=PLOD2 PE=1 SV=2	15649	20210911_zy_cell_ethcd_2.1992.1992.2	controllerType=0 controllerNumber=1 scan=1992	9.4063
02701:3	19	R.EAIN[+1702.581]ITLDHK.C	HexNAc(2)Hex(8)	N[+1703]	952.738	3	2856.2	2856.2	0	-1.3	206	Specific	288.91	158.2	158.2	5.21	8	>sp|O00469|PLOD2_HUMAN Procollagen-lysine,2-oxoglutarate 5-dioxygenase 2 OS=Homo sapiens OX=9606 GN=PLOD2 PE=1 SV=2	15649	20210911_zy_cell_ethcd_2.2975.2975.3	controllerType=0 controllerNumber=1 scan=2975	13.8683
01224:3	29	R.FNQC[+57.021]N[+2059.735]TTR.G	HexNAc(4)Hex(5)Fuc(1)NeuAc(1)	C[+57], N[+2060]	1034.07	3	3100.19	3100.19	0	-0.7	137	Specific	289.83	112.16	112.16	4.44	10	>sp|P09923|PPBI_HUMAN Intestinal-type alkaline phosphatase OS=Homo sapiens OX=9606 GN=ALPI PE=1 SV=2	15196	20210911_zy_cell_ethcd_2.1353.1353.3	controllerType=0 controllerNumber=1 scan=1353	6.4349
01066:3	26	R.GN[+2350.830]VTQHVQGHR.N	HexNAc(4)Hex(5)Fuc(1)NeuAc(2)	N[+2351]	1195.15	3	3583.45	3583.45	0	-1.4	76	Specific	290.18	103.25	103.25	5.54	5	>sp|Q15043|S39AE_HUMAN Zinc transporter ZIP14 OS=Homo sapiens OX=9606 GN=SLC39A14 PE=1 SV=3	16204	20210911_zy_cell_ethcd_2.1179.1179.3	controllerType=0 controllerNumber=1 scan=1179	5.6156
02783:3	3	K.VASVININPN[+2133.772]TTHSTGSC[+57.021]R.S	HexNAc(5)Hex(6)Fuc(1)	C[+57], N[+2134]	1387.93	3	4161.76	4161.76	0	-0.3	248	Specific	290.37	191.16	191.16	6.34	24	>sp|P13473|LAMP2_HUMAN Lysosome-associated membrane glycoprotein 2 OS=Homo sapiens OX=9606 GN=LAMP2 PE=1 SV=2	6694	20210911_zy_cell_ethcd_2.3065.3065.3	controllerType=0 controllerNumber=1 scan=3065	14.2809
00995:3	5	R.VTYQNHN[+2204.772]K.T	HexNAc(4)Hex(5)NeuAc(2)	N[+2205]	1070.09	3	3208.26	3208.27	0	-1	288	Specific	290.56	121.69	121.69	5.34	22	>sp|P32004|L1CAM_HUMAN Neural cell adhesion molecule L1 OS=Homo sapiens OX=9606 GN=L1CAM PE=1 SV=2	3537	20210911_zy_cell_ethcd_2.1101.1101.3	controllerType=0 controllerNumber=1 scan=1101	5.2413
03939:3	88	R.GN[+2350.830]ITEYQC[+57.021]HQYITK.M	HexNAc(4)Hex(5)Fuc(1)NeuAc(2)	C[+57], N[+2351]	1369.22	3	4105.65	4105.65	0	0	209	Specific	290.63	132.3	132.3	5.78	1	>sp|Q92896|GSLG1_HUMAN Golgi apparatus protein 1 OS=Homo sapiens OX=9606 GN=GLG1 PE=1 SV=2	13270	20210911_zy_cell_ethcd_2.4335.4335.3	controllerType=0 controllerNumber=1 scan=4335	20.0681
02450:2	3	R.VQPFN[+1378.476]VTQGK.Y	HexNAc(2)Hex(6)	N[+1378]	1248.54	2	2496.07	2496.08	0	-0.4	352	Specific	290.96	149.63	149.63	5.67	24	>sp|P13473|LAMP2_HUMAN Lysosome-associated membrane glycoprotein 2 OS=Homo sapiens OX=9606 GN=LAMP2 PE=1 SV=2	6694	20210911_zy_cell_ethcd_2.2699.2699.2	controllerType=0 controllerNumber=1 scan=2699	12.6106
03899:3	2	K.LRNPC[+57.021]TSEQN[+1710.598]C[+57.021]TSPFSYK.N	HexNAc(3)Hex(5)NeuAc(1)	C[+57]*2, N[+1711]	1300.53	3	3899.57	3899.57	0	-0.5	203	Specific	292.94	179.76	179.76	5.77	27	>sp|P05556|ITB1_HUMAN Integrin beta-1 OS=Homo sapiens OX=9606 GN=ITGB1 PE=1 SV=2	3061	20210911_zy_cell_ethcd_2.4291.4291.3	controllerType=0 controllerNumber=1 scan=4291	19.8688
02924:3	2	R.NPC[+57.021]TSEQN[+1540.529]C[+57.021]TSPFSYK.N	HexNAc(2)Hex(7)	C[+57]*2, N[+1541]	1154.11	3	3460.32	3460.32	0	-0.6	205	Specific	295.31	286.27	286.27	5.1	27	>sp|P05556|ITB1_HUMAN Integrin beta-1 OS=Homo sapiens OX=9606 GN=ITGB1 PE=1 SV=2	3061	20210911_zy_cell_ethcd_2.3220.3220.3	controllerType=0 controllerNumber=1 scan=3220	14.9825
01782:2	19	R.YN[+1702.581]C[+57.021]SIESPR.K	HexNAc(2)Hex(8)	C[+57], N[+1703]	1414.54	2	2828.08	2828.08	0	-0.3	695	Specific	295.85	118.44	118.44	5.5	8	>sp|O00469|PLOD2_HUMAN Procollagen-lysine,2-oxoglutarate 5-dioxygenase 2 OS=Homo sapiens OX=9606 GN=PLOD2 PE=1 SV=2	15649	20210911_zy_cell_ethcd_2.1966.1966.2	controllerType=0 controllerNumber=1 scan=1966	9.2787
01486:3	40	R.RPSTAN[+2350.830]VTR.A	HexNAc(4)Hex(5)Fuc(1)NeuAc(2)	N[+2351]	1118.13	3	3352.38	3352.38	0	-0.7	92	Specific	296.92	84.53	84.53	4.63	6	>sp|P0CW18|PRS56_HUMAN Serine protease 56 OS=Homo sapiens OX=9606 GN=PRSS56 PE=1 SV=1	12249	20210911_zy_cell_ethcd_2.1641.1641.3	controllerType=0 controllerNumber=1 scan=1641	7.7822
02987:3	91	R.VTGLN[+2350.830]C[+57.021]TTNHPINPK.G	HexNAc(4)Hex(5)Fuc(1)NeuAc(2)	C[+57], N[+2351]	1339.56	3	4016.67	4016.67	0	-0.3	864	Specific	297.62	115.5	115.5	5.61	1	>sp|P08648|ITA5_HUMAN Integrin alpha-5 OS=Homo sapiens OX=9606 GN=ITGA5 PE=1 SV=2	11180	20210911_zy_cell_ethcd_2.3289.3289.3	controllerType=0 controllerNumber=1 scan=3289	15.3076
01135:3	26	R.GN[+2715.963]VTQHVQGHR.N	HexNAc(5)Hex(6)Fuc(1)NeuAc(2)	N[+2716]	1316.87	3	3948.58	3948.59	0	-0.9	76	Specific	298.79	106.77	106.77	5.4	5	>sp|Q15043|S39AE_HUMAN Zinc transporter ZIP14 OS=Homo sapiens OX=9606 GN=SLC39A14 PE=1 SV=3	16204	20210911_zy_cell_ethcd_2.1255.1255.3	controllerType=0 controllerNumber=1 scan=1255	5.9775
02929:3	2	R.NPC[+57.021]TSEQN[+1378.476]C[+57.021]TSPFSYK.N	HexNAc(2)Hex(6)	C[+57]*2, N[+1378]	1100.09	3	3298.26	3298.27	0	-0.5	205	Specific	299.43	296.73	296.73	5.1	27	>sp|P05556|ITB1_HUMAN Integrin beta-1 OS=Homo sapiens OX=9606 GN=ITGB1 PE=1 SV=2	3061	20210911_zy_cell_ethcd_2.3225.3225.3	controllerType=0 controllerNumber=1 scan=3225	15.0057
00755:3	5	R.VTYQNHN[+1913.677]K.T	HexNAc(4)Hex(5)NeuAc(1)	N[+1914]	973.061	3	2917.17	2917.17	0	-1.2	288	Specific	300.24	113.67	113.67	5.3	22	>sp|P32004|L1CAM_HUMAN Neural cell adhesion molecule L1 OS=Homo sapiens OX=9606 GN=L1CAM PE=1 SV=2	3537	20210911_zy_cell_ethcd_2.836.836.3	controllerType=0 controllerNumber=1 scan=836	3.9842
02050:2	51	R.TVN[+1702.581]VSVPK.K	HexNAc(2)Hex(8)	N[+1703]	1273.54	2	2546.08	2546.07	0	0.2	89	Specific	300.78	224.32	224.32	4.89	5	>sp|Q96KA5|CLP1L_HUMAN Cleft lip and palate transmembrane protein 1-like protein OS=Homo sapiens OX=9606 GN=CLPTM1L PE=1 SV=1	1199	20210911_zy_cell_ethcd_2.2260.2260.2	controllerType=0 controllerNumber=1 scan=2260	10.613
01902:3	4	K.NN[+2059.735]HTASILDR.M	HexNAc(4)Hex(5)Fuc(1)NeuAc(1)	N[+2060]	1067.44	3	3200.31	3200.31	0	-0.9	129	Specific	301.47	72.65	72.65	5.13	21	>sp|P08962|CD63_HUMAN CD63 antigen OS=Homo sapiens OX=9606 GN=CD63 PE=1 SV=2	5151	20210911_zy_cell_ethcd_2.2098.2098.3	controllerType=0 controllerNumber=1 scan=2098	9.8832
02108:2	60	R.N[+1702.581]WTITR.L	HexNAc(2)Hex(8)	N[+1703]	1247	2	2493	2493	0	0.2	651	Specific	301.98	109.24	109.24	4.7	5	>sp|P19022|CADH2_HUMAN Cadherin-2 OS=Homo sapiens OX=9606 GN=CDH2 PE=1 SV=4	1389	20210911_zy_cell_ethcd_2.2324.2324.2	controllerType=0 controllerNumber=1 scan=2324	10.9072
05198:3	2	K.LRNPC[+57.021]TSEQN[+2350.830]C[+57.021]TSPFSYK.N	HexNAc(4)Hex(5)Fuc(1)NeuAc(2)	C[+57]*2, N[+2351]	1513.94	3	4539.8	4539.81	0	-0.9	203	Specific	302.87	199.67	199.67	5.77	27	>sp|P05556|ITB1_HUMAN Integrin beta-1 OS=Homo sapiens OX=9606 GN=ITGB1 PE=1 SV=2	3061	20210911_zy_cell_ethcd_2.5720.5720.3	controllerType=0 controllerNumber=1 scan=5720	26.3841
01927:3	79	R.YHGFLN[+2026.687]TSYHR.Q	HexNAc(2)Hex(10)	N[+2027]	1141.12	3	3421.34	3421.35	0	-3.2	87	Specific	303.21	157.64	157.64	4.81	2	>sp|P11117|PPAL_HUMAN Lysosomal acid phosphatase OS=Homo sapiens OX=9606 GN=ACP2 PE=1 SV=3	11545	20210911_zy_cell_ethcd_2.2125.2125.3	controllerType=0 controllerNumber=1 scan=2125	10.0047
03208:3	2	K.KDTC[+57.021]TQEC[+57.021]SYFN[+1864.634]ITK.V	HexNAc(2)Hex(9)	C[+57]*2, N[+1865]	1253.83	3	3759.46	3759.47	0	-0.1	658	Specific	303.48	226.68	226.68	5.81	27	>sp|P05556|ITB1_HUMAN Integrin beta-1 OS=Homo sapiens OX=9606 GN=ITGB1 PE=1 SV=2	3061	20210911_zy_cell_ethcd_2.3532.3532.3	controllerType=0 controllerNumber=1 scan=3532	16.4119
04852:3	24	R.TILVDNNTWN[+1702.581]NTHISR.V	HexNAc(2)Hex(8)	N[+1703]	1200.84	3	3600.52	3600.53	0	-4.3	539	Specific	304.27	209.79	80.05	5.13	4	>sp|P46977|STT3A_HUMAN Dolichyl-diphosphooligosaccharide--protein glycosyltransferase subunit STT3A OS=Homo sapiens OX=9606 GN=STT3A PE=1 SV=2	18762	20210911_zy_cell_ethcd_2.5339.5339.3	controllerType=0 controllerNumber=1 scan=5339	24.6656
01975:3	49	K.YHVLHIN[+1710.598]TTK.N	HexNAc(3)Hex(5)NeuAc(1)	N[+1711]	979.427	3	2936.27	2936.27	0	-0.4	102	Specific	304.57	150.67	150.67	5.57	3	>sp|Q7LGA3|HS2ST_HUMAN Heparan sulfate 2-O-sulfotransferase 1 OS=Homo sapiens OX=9606 GN=HS2ST1 PE=1 SV=1	4219	20210911_zy_cell_ethcd_2.2178.2178.3	controllerType=0 controllerNumber=1 scan=2178	10.2444
00879:3	1	R.KDN[+2424.867]TTVTR.L	HexNAc(5)Hex(6)Fuc(1)NeuAc(1)	N[+2425]	1120.46	3	3359.36	3359.36	0	-1.2	247	Specific	307.9	83.88	83.88	5.3	48	>sp|P11279|LAMP1_HUMAN Lysosome-associated membrane glycoprotein 1 OS=Homo sapiens OX=9606 GN=LAMP1 PE=1 SV=3	4405	20210911_zy_cell_ethcd_2.973.973.3	controllerType=0 controllerNumber=1 scan=973	4.6289
02884:3	39	K.GLN[+2026.687]LTEDTYKPR.I	HexNAc(2)Hex(10)	N[+2027]	1145.14	3	3433.41	3433.41	0	-0.9	396	Specific	307.93	190.14	190.14	5.62	6	>sp|Q08380|LG3BP_HUMAN Galectin-3-binding protein OS=Homo sapiens OX=9606 GN=LGALS3BP PE=1 SV=1	4876	20210911_zy_cell_ethcd_2.3176.3176.3	controllerType=0 controllerNumber=1 scan=3176	14.7844
03119:4	104	R.KPDPAEQQN[+2350.830]VTQVAHSPQGYNTAR.E	HexNAc(4)Hex(5)Fuc(1)NeuAc(2)	N[+2351]	1247.54	4	4987.13	4987.11	0	2.8	249	Specific	308.07	269.95	269.95	4.27	1	>sp|O00461|GOLI4_HUMAN Golgi integral membrane protein 4 OS=Homo sapiens OX=9606 GN=GOLIM4 PE=1 SV=1	5451	20210911_zy_cell_ethcd_2.3434.3434.4	controllerType=0 controllerNumber=1 scan=3434	15.9619
03875:3	2	K.LRNPC[+57.021]TSEQN[+2059.735]C[+57.021]TSPFSYK.N	HexNAc(4)Hex(5)Fuc(1)NeuAc(1)	C[+57]*2, N[+2060]	1416.91	3	4248.71	4248.71	0	-0.2	203	Specific	309.06	161.71	161.71	5.77	27	>sp|P05556|ITB1_HUMAN Integrin beta-1 OS=Homo sapiens OX=9606 GN=ITGB1 PE=1 SV=2	3061	20210911_zy_cell_ethcd_2.4265.4265.3	controllerType=0 controllerNumber=1 scan=4265	19.7542
02958:3	2	K.LRNPC[+57.021]TSEQN[+1378.476]C[+57.021]TSPFSYK.N	HexNAc(2)Hex(6)	C[+57]*2, N[+1378]	1189.82	3	3567.44	3567.45	0	-1.8	203	Specific	309.08	228.95	228.95	5.99	27	>sp|P05556|ITB1_HUMAN Integrin beta-1 OS=Homo sapiens OX=9606 GN=ITGB1 PE=1 SV=2	3061	20210911_zy_cell_ethcd_2.3257.3257.3	controllerType=0 controllerNumber=1 scan=3257	15.1565
02581:3	16	K.WGHN[+1864.634]ITEFQQR.F	HexNAc(2)Hex(9)	N[+1865]	1094.11	3	3280.31	3280.32	0	-1.9	277	Specific	310.21	198.75	198.75	5.76	6	>sp|Q96HE7|ERO1A_HUMAN ERO1-like protein alpha OS=Homo sapiens OX=9606 GN=ERO1A PE=1 SV=2	2944	20210911_zy_cell_ethcd_2.2843.2843.3	controllerType=0 controllerNumber=1 scan=2843	13.2697
02864:3	67	R.YVQN[+2350.830]GTYTVK.I	HexNAc(4)Hex(5)Fuc(1)NeuAc(2)	N[+2351]	1175.15	3	3523.42	3523.43	0	-0.7	459	Specific	311.54	157.95	157.95	4.91	3	>sp|Q14126|DSG2_HUMAN Desmoglein-2 OS=Homo sapiens OX=9606 GN=DSG2 PE=1 SV=2	1442	20210911_zy_cell_ethcd_2.3154.3154.3	controllerType=0 controllerNumber=1 scan=3154	14.6848
04184:2	33	R.N[+1702.581]VSTNVFFK.Q	HexNAc(2)Hex(8)	N[+1703]	1379.57	2	2758.13	2758.13	0	0	337	Specific	312.76	238.17	238.17	5.21	10	>sp|Q6YHK3|CD109_HUMAN CD109 antigen OS=Homo sapiens OX=9606 GN=CD109 PE=1 SV=2	8627	20210911_zy_cell_ethcd_2.4604.4604.2	controllerType=0 controllerNumber=1 scan=4604	21.3051
02385:2	1	R.LLNINPN[+1702.581]K.T	HexNAc(2)Hex(8)	N[+1703]	1314.57	2	2628.13	2628.13	0	-0.3	255	Specific	312.78	122.23	122.23	5.34	48	>sp|P11279|LAMP1_HUMAN Lysosome-associated membrane glycoprotein 1 OS=Homo sapiens OX=9606 GN=LAMP1 PE=1 SV=3	4405	20210911_zy_cell_ethcd_2.2628.2628.2	controllerType=0 controllerNumber=1 scan=2628	12.2815
03854:3	2	K.LRNPC[+57.021]TSEQN[+1872.651]C[+57.021]TSPFSYK.N	HexNAc(3)Hex(6)NeuAc(1)	C[+57]*2, N[+1873]	1354.55	3	4061.63	4061.63	0	0.6	203	Specific	314.75	166.93	166.93	5.28	27	>sp|P05556|ITB1_HUMAN Integrin beta-1 OS=Homo sapiens OX=9606 GN=ITGB1 PE=1 SV=2	3061	20210911_zy_cell_ethcd_2.4242.4242.3	controllerType=0 controllerNumber=1 scan=4242	19.6536
02719:3	9	R.FTFTSHTPGEHQIC[+57.021]LHSN[+1702.581]STK.F	HexNAc(2)Hex(8)	C[+57], N[+1703]	1377.91	3	4131.71	4131.71	0	-0.2	108	Specific	315.91	221.89	221.89	5.06	5	>sp|Q9BVK6|TMED9_HUMAN Transmembrane emp24 domain-containing protein 9 OS=Homo sapiens OX=9606 GN=TMED9 PE=1 SV=2	14554	20210911_zy_cell_ethcd_2.2995.2995.3	controllerType=0 controllerNumber=1 scan=2995	13.9573
02159:3	54	K.HLLEN[+1702.581]STASVSEAER.K	HexNAc(2)Hex(8)	N[+1703]	1115.8	3	3345.38	3345.38	0	-1.6	162	Specific	316.25	175.6	175.6	5.87	2	>sp|P42892|ECE1_HUMAN Endothelin-converting enzyme 1 OS=Homo sapiens OX=9606 GN=ECE1 PE=1 SV=2	4441	20210911_zy_cell_ethcd_2.2380.2380.3	controllerType=0 controllerNumber=1 scan=2380	11.1608
01318:2	20	K.AMSSN[+1864.634]ETAAYK.I	HexNAc(2)Hex(9)	N[+1865]	1519.08	2	3037.16	3037.16	0	-0.2	637	Specific	316.56	212.04	212.04	5.7	7	>sp|Q8TCJ2|STT3B_HUMAN Dolichyl-diphosphooligosaccharide--protein glycosyltransferase subunit STT3B OS=Homo sapiens OX=9606 GN=STT3B PE=1 SV=1	13685	20210911_zy_cell_ethcd_2.1456.1456.2	controllerType=0 controllerNumber=1 scan=1456	6.9189
01374:3	11	K.MN[+1702.581]FTGGDTC[+57.021]HK.V	HexNAc(2)Hex(8)	C[+57], N[+1703]	990.703	3	2970.09	2970.1	0	-2.3	1311	Specific	316.95	201.62	201.62	4.93	13	>sp|P11717|MPRI_HUMAN Cation-independent mannose-6-phosphate receptor OS=Homo sapiens OX=9606 GN=IGF2R PE=1 SV=3	12317	20210911_zy_cell_ethcd_2.1518.1518.3	controllerType=0 controllerNumber=1 scan=1518	7.2069
03311:3	1	R.GHTLTLN[+1581.555]FTR.N	HexNAc(3)Hex(6)	N[+1582]	914.396	3	2741.18	2741.18	0	-0.7	97	Specific	322.07	134.58	134.58	5.76	48	>sp|P11279|LAMP1_HUMAN Lysosome-associated membrane glycoprotein 1 OS=Homo sapiens OX=9606 GN=LAMP1 PE=1 SV=3	4405	20210911_zy_cell_ethcd_2.3645.3645.3	controllerType=0 controllerNumber=1 scan=3645	16.9294
03348:3	43	K.GQTEIQVNC[+57.021]PPAVTEN[+1378.476]K.T	HexNAc(2)Hex(6)	C[+57], N[+1378]	1088.46	3	3263.37	3263.39	0	-5.5	56	Specific	322.54	230.5	230.5	4.67	3	>sp|Q16563|SYPL1_HUMAN Synaptophysin-like protein 1 OS=Homo sapiens OX=9606 GN=SYPL1 PE=1 SV=1	16250	20210911_zy_cell_ethcd_2.3685.3685.3	controllerType=0 controllerNumber=1 scan=3685	17.1075
01853:3	47	R.DLGPTLAN[+1864.634]STHHNVR.L	HexNAc(2)Hex(9)	N[+1865]	1166.16	3	3496.45	3496.46	0	-1.2	302	Specific	322.79	172.7	172.7	5.86	4	>sp|P04062|GLCM_HUMAN Lysosomal acid glucosylceramidase OS=Homo sapiens OX=9606 GN=GBA PE=1 SV=3	6280	20210911_zy_cell_ethcd_2.2044.2044.3	controllerType=0 controllerNumber=1 scan=2044	9.6429
02426:3	5	K.VPGN[+2350.830]QTSTTLK.L	HexNAc(4)Hex(5)Fuc(1)NeuAc(2)	N[+2351]	1166.15	3	3496.44	3496.45	0	-0.6	668	Specific	323.33	121.83	121.83	4.99	22	>sp|P32004|L1CAM_HUMAN Neural cell adhesion molecule L1 OS=Homo sapiens OX=9606 GN=L1CAM PE=1 SV=2	3537	20210911_zy_cell_ethcd_2.2673.2673.3	controllerType=0 controllerNumber=1 scan=2673	12.4927
01718:2	21	K.N[+1702.581]QSVPLSC[+57.021]C[+57.021]R.E	HexNAc(2)Hex(8)	C[+57]*2, N[+1703]	1462.07	2	2923.13	2923.13	0	0.1	167	Specific	325.13	203.86	203.86	5.3	7	>sp|O60637|TSN3_HUMAN Tetraspanin-3 OS=Homo sapiens OX=9606 GN=TSPAN3 PE=2 SV=1	16532	20210911_zy_cell_ethcd_2.1896.1896.2	controllerType=0 controllerNumber=1 scan=1896	8.956
05511:3	37	K.GELN[+1864.634]TSIFSSRPIDK.F	HexNAc(2)Hex(9)	N[+1865]	1176.84	3	3528.49	3528.5	0	-1.3	350	Specific	326.67	228.14	228.14	5.14	5	>sp|Q9UHG3|PCYOX_HUMAN Prenylcysteine oxidase 1 OS=Homo sapiens OX=9606 GN=PCYOX1 PE=1 SV=3	9384	20210911_zy_cell_ethcd_2.6066.6066.3	controllerType=0 controllerNumber=1 scan=6066	27.9442
02353:2	70	R.N[+1702.581]ISQVLEK.K	HexNAc(2)Hex(8)	N[+1703]	1317.06	2	2633.11	2633.11	0	-0.1	439	Specific	328.34	121.07	121.07	5.42	3	>sp|O14672|ADA10_HUMAN Disintegrin and metalloproteinase domain-containing protein 10 OS=Homo sapiens OX=9606 GN=ADAM10 PE=1 SV=1	717	20210911_zy_cell_ethcd_2.2593.2593.2	controllerType=0 controllerNumber=1 scan=2593	12.1231
01208:3	30	K.HTNM[+15.995]N[+1702.581]LTQLK.V	HexNAc(2)Hex(8)	M[+16], N[+1703]	973.402	3	2918.19	2918.2	0	-1.7	250	Specific	328.88	134.2	134.2	5.9	6	>sp|Q15165|PON2_HUMAN Serum paraoxonase/arylesterase 2 OS=Homo sapiens OX=9606 GN=PON2 PE=1 SV=4	9244	20210911_zy_cell_ethcd_2.1335.1335.3	controllerType=0 controllerNumber=1 scan=1335	6.3492
04043:2	50	K.DSLSIN[+1702.581]ATNIK.H	HexNAc(2)Hex(8)	N[+1703]	1439.61	2	2878.21	2878.21	0	0.1	347	Specific	329.62	202.22	202.22	5.3	7	>sp|P00533|EGFR_HUMAN Epidermal growth factor receptor OS=Homo sapiens OX=9606 GN=EGFR PE=1 SV=2	19596	20210911_zy_cell_ethcd_2.4449.4449.2	controllerType=0 controllerNumber=1 scan=4449	20.5824
03104:3	27	R.LEN[+1864.634]ITTGTYTIHAQK.E	HexNAc(2)Hex(9)	N[+1865]	1185.51	3	3554.51	3554.51	0	-0.9	367	Specific	329.97	229.08	229.08	5.9	4	>sp|Q5JPE7|NOMO2_HUMAN Nodal modulator 2 OS=Homo sapiens OX=9606 GN=NOMO2 PE=1 SV=1	6463	20210911_zy_cell_ethcd_2.3417.3417.3	controllerType=0 controllerNumber=1 scan=3417	15.8833
02893:3	39	K.GLN[+1864.634]LTEDTYKPR.I	HexNAc(2)Hex(9)	N[+1865]	1091.12	3	3271.36	3271.36	0	-0.9	396	Specific	330.52	192.72	192.72	5.71	6	>sp|Q08380|LG3BP_HUMAN Galectin-3-binding protein OS=Homo sapiens OX=9606 GN=LGALS3BP PE=1 SV=1	4876	20210911_zy_cell_ethcd_2.3186.3186.3	controllerType=0 controllerNumber=1 scan=3186	14.8288
01789:2	19	R.YN[+1540.529]C[+57.021]SIESPR.K	HexNAc(2)Hex(7)	C[+57], N[+1541]	1333.52	2	2666.03	2666.03	0	-0.8	695	Specific	331.45	216.26	216.26	5.79	8	>sp|O00469|PLOD2_HUMAN Procollagen-lysine,2-oxoglutarate 5-dioxygenase 2 OS=Homo sapiens OX=9606 GN=PLOD2 PE=1 SV=2	15649	20210911_zy_cell_ethcd_2.1974.1974.2	controllerType=0 controllerNumber=1 scan=1974	9.3171
02410:2	3	R.VQPFN[+1702.581]VTQGK.Y	HexNAc(2)Hex(8)	N[+1703]	1410.59	2	2820.18	2820.18	0	0.1	352	Specific	334.94	181.96	181.96	5.22	24	>sp|P13473|LAMP2_HUMAN Lysosome-associated membrane glycoprotein 2 OS=Homo sapiens OX=9606 GN=LAMP2 PE=1 SV=2	6694	20210911_zy_cell_ethcd_2.2655.2655.2	controllerType=0 controllerNumber=1 scan=2655	12.4109
00789:3	1	R.KDN[+2059.735]TTVTR.L	HexNAc(4)Hex(5)Fuc(1)NeuAc(1)	N[+2060]	998.747	3	2994.23	2994.23	0	-1.4	247	Specific	335.86	136.78	136.78	5.56	48	>sp|P11279|LAMP1_HUMAN Lysosome-associated membrane glycoprotein 1 OS=Homo sapiens OX=9606 GN=LAMP1 PE=1 SV=3	4405	20210911_zy_cell_ethcd_2.874.874.3	controllerType=0 controllerNumber=1 scan=874	4.167
02865:3	96	R.EASIVGEN[+1864.634]ETYPR.A	HexNAc(2)Hex(9)	N[+1865]	1110.45	3	3329.33	3329.33	0	-0.3	601	Specific	336.53	235.19	235.19	5.12	1	>sp|Q9UBV2|SE1L1_HUMAN Protein sel-1 homolog 1 OS=Homo sapiens OX=9606 GN=SEL1L PE=1 SV=3	14445	20210911_zy_cell_ethcd_2.3155.3155.3	controllerType=0 controllerNumber=1 scan=3155	14.6893
01376:3	11	K.MN[+1864.634]FTGGDTC[+57.021]HK.V	HexNAc(2)Hex(9)	C[+57], N[+1865]	1044.72	3	3132.15	3132.15	0	-1.8	1311	Specific	337.46	298.25	298.25	5.99	13	>sp|P11717|MPRI_HUMAN Cation-independent mannose-6-phosphate receptor OS=Homo sapiens OX=9606 GN=IGF2R PE=1 SV=3	12317	20210911_zy_cell_ethcd_2.1520.1520.3	controllerType=0 controllerNumber=1 scan=1520	7.2165
02918:3	2	K.LRNPC[+57.021]TSEQN[+1540.529]C[+57.021]TSPFSYK.N	HexNAc(2)Hex(7)	C[+57]*2, N[+1541]	1243.84	3	3729.5	3729.5	0	-0.9	203	Specific	338.59	276.88	276.88	5.92	27	>sp|P05556|ITB1_HUMAN Integrin beta-1 OS=Homo sapiens OX=9606 GN=ITGB1 PE=1 SV=2	3061	20210911_zy_cell_ethcd_2.3213.3213.3	controllerType=0 controllerNumber=1 scan=3213	14.9518
01985:3	30	K.HTNMN[+1702.581]LTQLK.V	HexNAc(2)Hex(8)	N[+1703]	968.071	3	2902.2	2902.2	0	-0.8	250	Specific	339.03	165.14	165.14	5.71	6	>sp|Q15165|PON2_HUMAN Serum paraoxonase/arylesterase 2 OS=Homo sapiens OX=9606 GN=PON2 PE=1 SV=4	9244	20210911_zy_cell_ethcd_2.2189.2189.3	controllerType=0 controllerNumber=1 scan=2189	10.2917
01354:3	4	K.NN[+1702.581]HTASILDR.M	HexNAc(2)Hex(8)	N[+1703]	948.389	3	2843.15	2843.16	0	-1.3	129	Specific	339.23	160.91	160.91	5.85	21	>sp|P08962|CD63_HUMAN CD63 antigen OS=Homo sapiens OX=9606 GN=CD63 PE=1 SV=2	5151	20210911_zy_cell_ethcd_2.1496.1496.3	controllerType=0 controllerNumber=1 scan=1496	7.1048
05540:3	37	K.GELN[+1702.581]TSIFSSRPIDK.F	HexNAc(2)Hex(8)	N[+1703]	1122.82	3	3366.44	3366.45	0	-1.7	350	Specific	339.33	228.77	228.77	5.14	5	>sp|Q9UHG3|PCYOX_HUMAN Prenylcysteine oxidase 1 OS=Homo sapiens OX=9606 GN=PCYOX1 PE=1 SV=3	9384	20210911_zy_cell_ethcd_2.6098.6098.3	controllerType=0 controllerNumber=1 scan=6098	28.0829
02896:3	2	K.LRNPC[+57.021]TSEQN[+1702.581]C[+57.021]TSPFSYK.N	HexNAc(2)Hex(8)	C[+57]*2, N[+1703]	1297.86	3	3891.56	3891.56	0	-0.3	203	Specific	340.83	294.25	294.25	6	27	>sp|P05556|ITB1_HUMAN Integrin beta-1 OS=Homo sapiens OX=9606 GN=ITGB1 PE=1 SV=2	3061	20210911_zy_cell_ethcd_2.3189.3189.3	controllerType=0 controllerNumber=1 scan=3189	14.8422
01484:3	4	K.NN[+3229.168]HTASILDR.M	HexNAc(8)Hex(9)Fuc(1)	N[+3229]	1457.25	3	4369.74	4369.74	0	-0.2	129	Specific	341.29	177.8	177.8	5.71	21	>sp|P08962|CD63_HUMAN CD63 antigen OS=Homo sapiens OX=9606 GN=CD63 PE=1 SV=2	5151	20210911_zy_cell_ethcd_2.1638.1638.3	controllerType=0 controllerNumber=1 scan=1638	7.7703
04472:3	48	K.VPLQSAHLYYN[+1702.581]VTEK.V	HexNAc(2)Hex(8)	N[+1703]	1155.5	3	3464.5	3464.5	0	-0.7	530	Specific	341.32	222.92	222.92	5.9	3	>sp|Q32P28|P3H1_HUMAN Prolyl 3-hydroxylase 1 OS=Homo sapiens OX=9606 GN=P3H1 PE=1 SV=2	15467	20210911_zy_cell_ethcd_2.4920.4920.3	controllerType=0 controllerNumber=1 scan=4920	22.7688
02418:3	4	K.NN[+3081.095]HTASILDR.M	HexNAc(6)Hex(7)Fuc(1)NeuAc(2)	N[+3081]	1407.89	3	4221.67	4221.67	0	-0.3	129	Specific	345.05	151.98	151.98	5.76	21	>sp|P08962|CD63_HUMAN CD63 antigen OS=Homo sapiens OX=9606 GN=CD63 PE=1 SV=2	5151	20210911_zy_cell_ethcd_2.2664.2664.3	controllerType=0 controllerNumber=1 scan=2664	12.4518
03136:3	27	R.LEN[+1540.529]ITTGTYTIHAQK.E	HexNAc(2)Hex(7)	N[+1541]	1077.47	3	3230.41	3230.41	0	-0.6	367	Specific	345.82	197.76	197.76	5.82	4	>sp|Q5JPE7|NOMO2_HUMAN Nodal modulator 2 OS=Homo sapiens OX=9606 GN=NOMO2 PE=1 SV=1	6463	20210911_zy_cell_ethcd_2.3453.3453.3	controllerType=0 controllerNumber=1 scan=3453	16.0459
01267:3	8	R.YHYN[+1702.581]GTFEDGKK.F	HexNAc(2)Hex(8)	N[+1703]	1054.42	3	3161.25	3161.25	0	-0.3	67	Specific	346.02	224.39	224.39	5.13	10	>sp|Q96AY3|FKB10_HUMAN Peptidyl-prolyl cis-trans isomerase FKBP10 OS=Homo sapiens OX=9606 GN=FKBP10 PE=1 SV=1	19614	20210911_zy_cell_ethcd_2.1400.1400.3	controllerType=0 controllerNumber=1 scan=1400	6.6598
05994:3	32	K.C[+57.021]NMIN[+1702.581]GTDGDSFHPLITK.D	HexNAc(2)Hex(8)	C[+57], N[+1703]	1241.51	3	3722.5	3722.51	0	-0.8	245	Specific	347.04	318.07	318.07	6.57	4	>sp|Q14108|SCRB2_HUMAN Lysosome membrane protein 2 OS=Homo sapiens OX=9606 GN=SCARB2 PE=1 SV=2	18342	20210911_zy_cell_ethcd_2.6598.6598.3	controllerType=0 controllerNumber=1 scan=6598	30.3496
01346:3	4	K.NN[+1864.634]HTASILDR.M	HexNAc(2)Hex(9)	N[+1865]	1002.41	3	3005.21	3005.21	0	-0.6	129	Specific	349.73	194.12	194.12	5.71	21	>sp|P08962|CD63_HUMAN CD63 antigen OS=Homo sapiens OX=9606 GN=CD63 PE=1 SV=2	5151	20210911_zy_cell_ethcd_2.1487.1487.3	controllerType=0 controllerNumber=1 scan=1487	7.0606
03015:3	18	K.LVGGPVAGGDPN[+1702.581]QTIR.G	HexNAc(2)Hex(8)	N[+1703]	1085.14	3	3253.41	3253.41	0	1.2	84	Specific	350.78	223.55	223.55	4.66	8	>sp|O15230|LAMA5_HUMAN Laminin subunit alpha-5 OS=Homo sapiens OX=9606 GN=LAMA5 PE=1 SV=8	2334	20210911_zy_cell_ethcd_2.3320.3320.3	controllerType=0 controllerNumber=1 scan=3320	15.448
02803:3	3	K.VASVININPN[+1702.581]TTHSTGSC[+57.021]R.S	HexNAc(2)Hex(8)	C[+57], N[+1703]	1244.2	3	3730.58	3730.57	0	0.9	248	Specific	351.57	289.25	289.25	6.07	24	>sp|P13473|LAMP2_HUMAN Lysosome-associated membrane glycoprotein 2 OS=Homo sapiens OX=9606 GN=LAMP2 PE=1 SV=2	6694	20210911_zy_cell_ethcd_2.3087.3087.3	controllerType=0 controllerNumber=1 scan=3087	14.3794
01139:3	26	R.GN[+2350.830]VTQHVQGHR.N	HexNAc(4)Hex(5)Fuc(1)NeuAc(2)	N[+2351]	1195.16	3	3583.45	3583.45	0	-0.6	76	Specific	352.42	143.6	143.6	5.66	5	>sp|Q15043|S39AE_HUMAN Zinc transporter ZIP14 OS=Homo sapiens OX=9606 GN=SLC39A14 PE=1 SV=3	16204	20210911_zy_cell_ethcd_2.1259.1259.3	controllerType=0 controllerNumber=1 scan=1259	5.9965
00811:3	6	K.DSC[+57.021]ESNHN[+1702.581]ITC[+57.021]K.V	HexNAc(2)Hex(8)	C[+57]*2, N[+1703]	1056.39	3	3167.16	3167.17	0	-1.1	876	Specific	353.85	336.91	336.91	6.06	15	>sp|P56199|ITA1_HUMAN Integrin alpha-1 OS=Homo sapiens OX=9606 GN=ITGA1 PE=1 SV=2	9701	20210911_zy_cell_ethcd_2.898.898.3	controllerType=0 controllerNumber=1 scan=898	4.2746
07478:3	20	R.TTLVDNNTWN[+1864.634]NSHIALVGK.A	HexNAc(2)Hex(9)	N[+1865]	1321.24	3	3961.7	3961.71	0	-1	618	Specific	357.08	260.26	77.84	6.49	7	>sp|Q8TCJ2|STT3B_HUMAN Dolichyl-diphosphooligosaccharide--protein glycosyltransferase subunit STT3B OS=Homo sapiens OX=9606 GN=STT3B PE=1 SV=1	13685	20210911_zy_cell_ethcd_2.8273.8273.3	controllerType=0 controllerNumber=1 scan=8273	37.8138
02016:3	6	R.YN[+2026.687]HTGQVIIYR.M	HexNAc(2)Hex(10)	N[+2027]	1130.8	3	3390.4	3390.4	0	-1	459	Specific	359.44	205.2	205.2	5.79	15	>sp|P56199|ITA1_HUMAN Integrin alpha-1 OS=Homo sapiens OX=9606 GN=ITGA1 PE=1 SV=2	9701	20210911_zy_cell_ethcd_2.2223.2223.3	controllerType=0 controllerNumber=1 scan=2223	10.4462
02669:2	52	R.FINYN[+1864.634]QTVSR.M	HexNAc(2)Hex(9)	N[+1865]	1553.63	2	3106.26	3106.26	0	0.1	909	Specific	359.8	170.09	170.09	5.22	4	>sp|Q8N766|EMC1_HUMAN ER membrane protein complex subunit 1 OS=Homo sapiens OX=9606 GN=EMC1 PE=1 SV=1	4991	20210911_zy_cell_ethcd_2.2940.2940.2	controllerType=0 controllerNumber=1 scan=2940	13.7065
00810:3	26	R.GN[+2059.735]VTQHVQGHR.N	HexNAc(4)Hex(5)Fuc(1)NeuAc(1)	N[+2060]	1098.12	3	3292.36	3292.36	0	-0.9	76	Specific	360.64	130.99	130.99	5.53	5	>sp|Q15043|S39AE_HUMAN Zinc transporter ZIP14 OS=Homo sapiens OX=9606 GN=SLC39A14 PE=1 SV=3	16204	20210911_zy_cell_ethcd_2.897.897.3	controllerType=0 controllerNumber=1 scan=897	4.2696
04474:3	48	K.VPLQSAHLYYN[+1702.581]VTEK.V	HexNAc(2)Hex(8)	N[+1703]	1155.5	3	3464.49	3464.5	0	-1.6	530	Specific	360.9	249.21	249.21	5.88	3	>sp|Q32P28|P3H1_HUMAN Prolyl 3-hydroxylase 1 OS=Homo sapiens OX=9606 GN=P3H1 PE=1 SV=2	15467	20210911_zy_cell_ethcd_2.4923.4923.3	controllerType=0 controllerNumber=1 scan=4923	22.7803
02560:3	13	R.IAPASN[+1864.634]VSHTVVLR.P	HexNAc(2)Hex(9)	N[+1865]	1110.16	3	3328.46	3328.47	0	-1.3	83	Specific	362.3	208.46	208.46	5.3	6	>sp|P43308|SSRB_HUMAN Translocon-associated protein subunit beta OS=Homo sapiens OX=9606 GN=SSR2 PE=1 SV=1	13071	20210911_zy_cell_ethcd_2.2820.2820.3	controllerType=0 controllerNumber=1 scan=2820	13.1654
01798:2	6	R.N[+1702.581]TTFNVESTK.K	HexNAc(2)Hex(8)	N[+1703]	1422.07	2	2843.13	2843.13	0	0	418	Specific	366.48	254.04	254.04	5.64	15	>sp|P56199|ITA1_HUMAN Integrin alpha-1 OS=Homo sapiens OX=9606 GN=ITGA1 PE=1 SV=2	9701	20210911_zy_cell_ethcd_2.1984.1984.2	controllerType=0 controllerNumber=1 scan=1984	9.3648
01505:3	4	K.NN[+2133.772]HTASILDR.M	HexNAc(5)Hex(6)Fuc(1)	N[+2134]	1092.12	3	3274.35	3274.35	0	-0.6	129	Specific	366.54	197	197	5.58	21	>sp|P08962|CD63_HUMAN CD63 antigen OS=Homo sapiens OX=9606 GN=CD63 PE=1 SV=2	5151	20210911_zy_cell_ethcd_2.1662.1662.3	controllerType=0 controllerNumber=1 scan=1662	7.8765
04283:4	9	R.FTFTSHTPGEHQIC[+57.021]LHSN[+2350.830]STK.F	HexNAc(4)Hex(5)Fuc(1)NeuAc(2)	C[+57], N[+2351]	1195.74	4	4779.95	4779.96	0	-1.2	108	Specific	368.49	270.77	270.77	5.83	5	>sp|Q9BVK6|TMED9_HUMAN Transmembrane emp24 domain-containing protein 9 OS=Homo sapiens OX=9606 GN=TMED9 PE=1 SV=2	14554	20210911_zy_cell_ethcd_2.4713.4713.4	controllerType=0 controllerNumber=1 scan=4713	21.8118
01748:2	21	K.N[+1378.476]QSVPLSC[+57.021]C[+57.021]R.E	HexNAc(2)Hex(6)	C[+57]*2, N[+1378]	1300.02	2	2599.03	2599.03	0	-0.3	167	Specific	368.58	279.63	279.63	5.64	7	>sp|O60637|TSN3_HUMAN Tetraspanin-3 OS=Homo sapiens OX=9606 GN=TSPAN3 PE=2 SV=1	16532	20210911_zy_cell_ethcd_2.1929.1929.2	controllerType=0 controllerNumber=1 scan=1929	9.1121
02049:3	16	K.KWGHN[+1378.476]ITEFQQR.F	HexNAc(2)Hex(6)	N[+1378]	974.755	3	2922.25	2922.25	0	-0.4	276	Specific	370.64	241.33	241.33	5.54	6	>sp|Q96HE7|ERO1A_HUMAN ERO1-like protein alpha OS=Homo sapiens OX=9606 GN=ERO1A PE=1 SV=2	2944	20210911_zy_cell_ethcd_2.2259.2259.3	controllerType=0 controllerNumber=1 scan=2259	10.6085
00873:3	26	R.GN[+2059.735]VTQHVQGHR.N	HexNAc(4)Hex(5)Fuc(1)NeuAc(1)	N[+2060]	1098.12	3	3292.36	3292.36	0	-1	76	Specific	372.27	141.08	141.08	5.53	5	>sp|Q15043|S39AE_HUMAN Zinc transporter ZIP14 OS=Homo sapiens OX=9606 GN=SLC39A14 PE=1 SV=3	16204	20210911_zy_cell_ethcd_2.966.966.3	controllerType=0 controllerNumber=1 scan=966	4.597
01305:3	8	R.YHYN[+1540.529]GTFEDGKK.F	HexNAc(2)Hex(7)	N[+1541]	1000.4	3	2999.19	2999.19	0	-1.4	67	Specific	379	264.72	264.72	5.12	10	>sp|Q96AY3|FKB10_HUMAN Peptidyl-prolyl cis-trans isomerase FKBP10 OS=Homo sapiens OX=9606 GN=FKBP10 PE=1 SV=1	19614	20210911_zy_cell_ethcd_2.1442.1442.3	controllerType=0 controllerNumber=1 scan=1442	6.8511
02821:3	3	K.VASVININPN[+1540.529]TTHSTGSC[+57.021]R.S	HexNAc(2)Hex(7)	C[+57], N[+1541]	1190.18	3	3568.52	3568.52	0	-0.6	248	Specific	379.13	300.87	300.87	6.43	24	>sp|P13473|LAMP2_HUMAN Lysosome-associated membrane glycoprotein 2 OS=Homo sapiens OX=9606 GN=LAMP2 PE=1 SV=2	6694	20210911_zy_cell_ethcd_2.3107.3107.3	controllerType=0 controllerNumber=1 scan=3107	14.467
00776:3	1	R.KDN[+2059.735]TTVTR.L	HexNAc(4)Hex(5)Fuc(1)NeuAc(1)	N[+2060]	998.746	3	2994.22	2994.23	0	-2.3	247	Specific	381.14	121.07	121.07	4.55	48	>sp|P11279|LAMP1_HUMAN Lysosome-associated membrane glycoprotein 1 OS=Homo sapiens OX=9606 GN=LAMP1 PE=1 SV=3	4405	20210911_zy_cell_ethcd_2.859.859.3	controllerType=0 controllerNumber=1 scan=859	4.0974
01432:3	38	K.SQNRPQGQSTQPSNAAGTN[+406.159]TTSASTPR.S	HexNAc(2)	N[+406]	1050.82	3	3150.45	3150.45	0	-1	104	Specific	381.58	277.36	277.36	5.53	2	>sp|Q9UHD9|UBQL2_HUMAN Ubiquilin-2 OS=Homo sapiens OX=9606 GN=UBQLN2 PE=1 SV=2	18505	20210911_zy_cell_ethcd_2.1581.1581.3	controllerType=0 controllerNumber=1 scan=1581	7.5098
02608:3	16	K.WGHN[+1702.581]ITEFQQR.F	HexNAc(2)Hex(8)	N[+1703]	1040.09	3	3118.26	3118.26	0	-0.5	277	Specific	382.18	234.76	234.76	5.66	6	>sp|Q96HE7|ERO1A_HUMAN ERO1-like protein alpha OS=Homo sapiens OX=9606 GN=ERO1A PE=1 SV=2	2944	20210911_zy_cell_ethcd_2.2873.2873.3	controllerType=0 controllerNumber=1 scan=2873	13.4054
01356:3	4	K.NN[+2026.687]HTASILDR.M	HexNAc(2)Hex(10)	N[+2027]	1056.42	3	3167.26	3167.26	0	-1.2	129	Specific	384.82	201.77	201.77	5.79	21	>sp|P08962|CD63_HUMAN CD63 antigen OS=Homo sapiens OX=9606 GN=CD63 PE=1 SV=2	5151	20210911_zy_cell_ethcd_2.1498.1498.3	controllerType=0 controllerNumber=1 scan=1498	7.1144
01760:3	8	R.YHYN[+1378.476]GTFEDGK.K	HexNAc(2)Hex(6)	N[+1378]	903.685	3	2709.04	2709.05	0	-1.4	67	Specific	385.08	253.86	253.86	5.78	10	>sp|Q96AY3|FKB10_HUMAN Peptidyl-prolyl cis-trans isomerase FKBP10 OS=Homo sapiens OX=9606 GN=FKBP10 PE=1 SV=1	19614	20210911_zy_cell_ethcd_2.1942.1942.3	controllerType=0 controllerNumber=1 scan=1942	9.1725
02949:3	7	R.N[+1540.529]ISGVVLADHSGAFHNK.Y	HexNAc(2)Hex(7)	N[+1541]	1102.81	3	3306.42	3306.43	0	-0.9	435	Specific	388.76	291.75	291.75	6.33	12	>sp|Q92542|NICA_HUMAN Nicastrin OS=Homo sapiens OX=9606 GN=NCSTN PE=1 SV=2	7240	20210911_zy_cell_ethcd_2.3247.3247.3	controllerType=0 controllerNumber=1 scan=3247	15.1118
01778:3	7	K.PIN[+1702.581]TTGTLKPDDR.V	HexNAc(2)Hex(8)	N[+1703]	1044.11	3	3130.33	3130.33	0	-1	262	Specific	391.78	244.08	244.08	5.75	12	>sp|Q92542|NICA_HUMAN Nicastrin OS=Homo sapiens OX=9606 GN=NCSTN PE=1 SV=2	7240	20210911_zy_cell_ethcd_2.1962.1962.3	controllerType=0 controllerNumber=1 scan=1962	9.2605
02420:2	3	R.VQPFN[+1540.529]VTQGK.Y	HexNAc(2)Hex(7)	N[+1541]	1329.57	2	2658.13	2658.13	0	-0.3	352	Specific	393.91	216.7	216.7	5.66	24	>sp|P13473|LAMP2_HUMAN Lysosome-associated membrane glycoprotein 2 OS=Homo sapiens OX=9606 GN=LAMP2 PE=1 SV=2	6694	20210911_zy_cell_ethcd_2.2666.2666.2	controllerType=0 controllerNumber=1 scan=2666	12.4608
02862:3	3	K.VASVININPN[+1727.613]TTHSTGSC[+57.021]R.S	HexNAc(3)Hex(6)Fuc(1)	C[+57], N[+1728]	1252.54	3	3755.61	3755.61	0	0.1	248	Specific	396.33	278.57	278.57	5.26	24	>sp|P13473|LAMP2_HUMAN Lysosome-associated membrane glycoprotein 2 OS=Homo sapiens OX=9606 GN=LAMP2 PE=1 SV=2	6694	20210911_zy_cell_ethcd_2.3152.3152.3	controllerType=0 controllerNumber=1 scan=3152	14.6759
04093:3	57	K.GRDIYTFDGALN[+1540.529]K.S	HexNAc(2)Hex(7)	N[+1541]	1004.09	3	3010.26	3010.27	0	-1	62	Specific	398.67	327.83	327.83	5.33	2	>sp|Q08722|CD47_HUMAN Leukocyte surface antigen CD47 OS=Homo sapiens OX=9606 GN=CD47 PE=1 SV=1	886	20210911_zy_cell_ethcd_2.4504.4504.3	controllerType=0 controllerNumber=1 scan=4504	20.8322
01839:3	4	K.NN[+3155.132]HTASILDR.M	HexNAc(7)Hex(8)Fuc(1)NeuAc(1)	N[+3155]	1432.57	3	4295.71	4295.71	0	-0.4	129	Specific	399.37	203.83	203.83	5.66	21	>sp|P08962|CD63_HUMAN CD63 antigen OS=Homo sapiens OX=9606 GN=CD63 PE=1 SV=2	5151	20210911_zy_cell_ethcd_2.2029.2029.3	controllerType=0 controllerNumber=1 scan=2029	9.5741
01312:3	8	R.YHYN[+1378.476]GTFEDGKK.F	HexNAc(2)Hex(6)	N[+1378]	946.384	3	2837.14	2837.14	0	-0.9	67	Specific	400.26	290.86	290.86	5.26	10	>sp|Q96AY3|FKB10_HUMAN Peptidyl-prolyl cis-trans isomerase FKBP10 OS=Homo sapiens OX=9606 GN=FKBP10 PE=1 SV=1	19614	20210911_zy_cell_ethcd_2.1449.1449.3	controllerType=0 controllerNumber=1 scan=1449	6.8861
03217:3	1	R.GHTLTLN[+1864.634]FTR.N	HexNAc(2)Hex(9)	N[+1865]	1008.76	3	3024.25	3024.26	0	-1.3	97	Specific	400.66	248.55	248.55	5.98	48	>sp|P11279|LAMP1_HUMAN Lysosome-associated membrane glycoprotein 1 OS=Homo sapiens OX=9606 GN=LAMP1 PE=1 SV=3	4405	20210911_zy_cell_ethcd_2.3542.3542.3	controllerType=0 controllerNumber=1 scan=3542	16.4567
02513:3	4	K.NN[+2350.830]HTASILDR.M	HexNAc(4)Hex(5)Fuc(1)NeuAc(2)	N[+2351]	1164.47	3	3491.4	3491.41	0	-0.6	129	Specific	402	196.08	196.08	5.78	21	>sp|P08962|CD63_HUMAN CD63 antigen OS=Homo sapiens OX=9606 GN=CD63 PE=1 SV=2	5151	20210911_zy_cell_ethcd_2.2768.2768.3	controllerType=0 controllerNumber=1 scan=2768	12.9287
02027:3	6	R.YN[+1702.581]HTGQVIIYR.M	HexNAc(2)Hex(8)	N[+1703]	1022.77	3	3066.29	3066.29	0	-1.1	459	Specific	404.4	255.13	255.13	5.84	15	>sp|P56199|ITA1_HUMAN Integrin alpha-1 OS=Homo sapiens OX=9606 GN=ITGA1 PE=1 SV=2	9701	20210911_zy_cell_ethcd_2.2235.2235.3	controllerType=0 controllerNumber=1 scan=2235	10.4982
03272:3	13	R.IAPASN[+1864.634]VSHTVVLRPLK.A	HexNAc(2)Hex(9)	N[+1865]	1222.9	3	3666.7	3666.7	0	-0.8	83	Specific	404.96	329.76	329.76	6.6	6	>sp|P43308|SSRB_HUMAN Translocon-associated protein subunit beta OS=Homo sapiens OX=9606 GN=SSR2 PE=1 SV=1	13071	20210911_zy_cell_ethcd_2.3602.3602.3	controllerType=0 controllerNumber=1 scan=3602	16.734
01434:3	38	K.SQNRPQGQSTQPSNAAGTN[+406.159]TTSASTPR.S	HexNAc(2)	N[+406]	1050.82	3	3150.45	3150.45	0	-0.9	104	Specific	406.73	289.72	289.72	5.63	2	>sp|Q9UHD9|UBQL2_HUMAN Ubiquilin-2 OS=Homo sapiens OX=9606 GN=UBQLN2 PE=1 SV=2	18505	20210911_zy_cell_ethcd_2.1584.1584.3	controllerType=0 controllerNumber=1 scan=1584	7.5202
02645:3	16	K.WGHN[+1378.476]ITEFQQR.F	HexNAc(2)Hex(6)	N[+1378]	932.056	3	2794.15	2794.16	0	-0.9	277	Specific	407.08	261.55	261.55	5.84	6	>sp|Q96HE7|ERO1A_HUMAN ERO1-like protein alpha OS=Homo sapiens OX=9606 GN=ERO1A PE=1 SV=2	2944	20210911_zy_cell_ethcd_2.2913.2913.3	controllerType=0 controllerNumber=1 scan=2913	13.585
01726:3	29	R.FNQC[+57.021]N[+2350.830]TTR.G	HexNAc(4)Hex(5)Fuc(1)NeuAc(2)	C[+57], N[+2351]	1131.1	3	3391.29	3391.29	0	-0.3	137	Specific	409.12	156.01	156.01	4.74	10	>sp|P09923|PPBI_HUMAN Intestinal-type alkaline phosphatase OS=Homo sapiens OX=9606 GN=ALPI PE=1 SV=2	15196	20210911_zy_cell_ethcd_2.1904.1904.3	controllerType=0 controllerNumber=1 scan=1904	8.9974
01738:3	8	R.YHYN[+1702.581]GTFEDGK.K	HexNAc(2)Hex(8)	N[+1703]	1011.72	3	3033.15	3033.15	0	-1	67	Specific	413.59	266.37	266.37	5.84	10	>sp|Q96AY3|FKB10_HUMAN Peptidyl-prolyl cis-trans isomerase FKBP10 OS=Homo sapiens OX=9606 GN=FKBP10 PE=1 SV=1	19614	20210911_zy_cell_ethcd_2.1918.1918.3	controllerType=0 controllerNumber=1 scan=1918	9.0602
03709:3	3	K.VASVININPN[+2059.735]TTHSTGSC[+57.021]R.S	HexNAc(4)Hex(5)Fuc(1)NeuAc(1)	C[+57], N[+2060]	1363.25	3	4087.73	4087.73	0	0.2	248	Specific	415.53	285.96	285.96	6.14	24	>sp|P13473|LAMP2_HUMAN Lysosome-associated membrane glycoprotein 2 OS=Homo sapiens OX=9606 GN=LAMP2 PE=1 SV=2	6694	20210911_zy_cell_ethcd_2.4082.4082.3	controllerType=0 controllerNumber=1 scan=4082	18.9306
01345:2	61	K.N[+1864.634]YTADYDK.A	HexNAc(2)Hex(9)	N[+1865]	1427.53	2	2854.06	2854.06	0	0.5	106	Specific	415.74	315.59	315.59	5.1	2	>sp|O94905|ERLN2_HUMAN Erlin-2 OS=Homo sapiens OX=9606 GN=ERLIN2 PE=1 SV=1	5719	20210911_zy_cell_ethcd_2.1486.1486.2	controllerType=0 controllerNumber=1 scan=1486	7.0545
05263:2	55	K.QNNGAFN[+203.079]ETLFR.N	HexNAc(1)	N[+203]	807.382	2	1613.76	1613.76	0	0.9	721	Specific	416.83	319.94	319.94	4.72	4	>sp|P02786|TFR1_HUMAN Transferrin receptor protein 1 OS=Homo sapiens OX=9606 GN=TFRC PE=1 SV=2	16028	20210911_zy_cell_ethcd_2.5791.5791.2	controllerType=0 controllerNumber=1 scan=5791	26.7057
02611:3	5	R.THN[+1702.581]LTDLSPHLR.Y	HexNAc(2)Hex(8)	N[+1703]	1036.11	3	3106.32	3106.32	0	-0.7	977	Specific	417.57	273.73	273.73	5.74	22	>sp|P32004|L1CAM_HUMAN Neural cell adhesion molecule L1 OS=Homo sapiens OX=9606 GN=L1CAM PE=1 SV=2	3537	20210911_zy_cell_ethcd_2.2876.2876.3	controllerType=0 controllerNumber=1 scan=2876	13.4193
01065:3	1	R.KDN[+2715.963]TTVTR.L	HexNAc(5)Hex(6)Fuc(1)NeuAc(2)	N[+2716]	1217.49	3	3650.46	3650.46	0	-0.7	247	Specific	420.5	144.8	144.8	5.49	48	>sp|P11279|LAMP1_HUMAN Lysosome-associated membrane glycoprotein 1 OS=Homo sapiens OX=9606 GN=LAMP1 PE=1 SV=3	4405	20210911_zy_cell_ethcd_2.1178.1178.3	controllerType=0 controllerNumber=1 scan=1178	5.6111
01750:3	8	R.YHYN[+1540.529]GTFEDGK.K	HexNAc(2)Hex(7)	N[+1541]	957.703	3	2871.1	2871.1	0	-1.1	67	Specific	422.22	350.37	350.37	6.13	10	>sp|Q96AY3|FKB10_HUMAN Peptidyl-prolyl cis-trans isomerase FKBP10 OS=Homo sapiens OX=9606 GN=FKBP10 PE=1 SV=1	19614	20210911_zy_cell_ethcd_2.1931.1931.3	controllerType=0 controllerNumber=1 scan=1931	9.1226
01955:3	49	K.YHVLHIN[+1872.651]TTK.N	HexNAc(3)Hex(6)NeuAc(1)	N[+1873]	1033.44	3	3098.32	3098.32	0	-0.7	102	Specific	422.23	216.91	216.91	5.76	3	>sp|Q7LGA3|HS2ST_HUMAN Heparan sulfate 2-O-sulfotransferase 1 OS=Homo sapiens OX=9606 GN=HS2ST1 PE=1 SV=1	4219	20210911_zy_cell_ethcd_2.2156.2156.3	controllerType=0 controllerNumber=1 scan=2156	10.1481
03480:3	5	R.THN[+1872.651]LTDLSPHLR.Y	HexNAc(3)Hex(6)NeuAc(1)	N[+1873]	1092.8	3	3276.39	3276.39	0	-0.8	977	Specific	424.14	207.7	207.7	5.76	22	>sp|P32004|L1CAM_HUMAN Neural cell adhesion molecule L1 OS=Homo sapiens OX=9606 GN=L1CAM PE=1 SV=2	3537	20210911_zy_cell_ethcd_2.3831.3831.3	controllerType=0 controllerNumber=1 scan=3831	17.7779
02012:3	6	R.YN[+1864.634]HTGQVIIYR.M	HexNAc(2)Hex(9)	N[+1865]	1076.79	3	3228.34	3228.35	0	-0.7	459	Specific	426	272.44	272.44	5.84	15	>sp|P56199|ITA1_HUMAN Integrin alpha-1 OS=Homo sapiens OX=9606 GN=ITGA1 PE=1 SV=2	9701	20210911_zy_cell_ethcd_2.2218.2218.3	controllerType=0 controllerNumber=1 scan=2218	10.4259
00869:2	10	K.N[+1864.634]ATLAEQAK.L	HexNAc(2)Hex(9)	N[+1865]	1405.57	2	2810.13	2810.13	0	0.2	869	Specific	426.03	269.12	269.12	5.35	14	>sp|Q9Y4L1|HYOU1_HUMAN Hypoxia up-regulated protein 1 OS=Homo sapiens OX=9606 GN=HYOU1 PE=1 SV=1	14756	20210911_zy_cell_ethcd_2.962.962.2	controllerType=0 controllerNumber=1 scan=962	4.5745
02594:3	16	K.WGHN[+1864.634]ITEFQQR.F	HexNAc(2)Hex(9)	N[+1865]	1094.11	3	3280.31	3280.32	0	-1	277	Specific	427.76	300.21	300.21	5.92	6	>sp|Q96HE7|ERO1A_HUMAN ERO1-like protein alpha OS=Homo sapiens OX=9606 GN=ERO1A PE=1 SV=2	2944	20210911_zy_cell_ethcd_2.2857.2857.3	controllerType=0 controllerNumber=1 scan=2857	13.3366
03116:3	27	R.LEN[+1702.581]ITTGTYTIHAQK.E	HexNAc(2)Hex(8)	N[+1703]	1131.49	3	3392.46	3392.46	0	-0.6	367	Specific	428.62	345.99	345.99	6.09	4	>sp|Q5JPE7|NOMO2_HUMAN Nodal modulator 2 OS=Homo sapiens OX=9606 GN=NOMO2 PE=1 SV=1	6463	20210911_zy_cell_ethcd_2.3431.3431.3	controllerType=0 controllerNumber=1 scan=3431	15.9468
04023:3	67	K.IN[+2350.830]ATDADEPNTLNSK.I	HexNAc(4)Hex(5)Fuc(1)NeuAc(2)	N[+2351]	1318.54	3	3953.59	3953.59	0	0.6	181	Specific	429.2	268.81	268.81	4.7	3	>sp|Q14126|DSG2_HUMAN Desmoglein-2 OS=Homo sapiens OX=9606 GN=DSG2 PE=1 SV=2	1442	20210911_zy_cell_ethcd_2.4427.4427.3	controllerType=0 controllerNumber=1 scan=4427	20.4807
02214:2	11	K.TN[+1702.581]ITLVC[+57.021]K.P	HexNAc(2)Hex(8)	C[+57], N[+1703]	1326.05	2	2651.1	2651.1	0	-0.1	580	Specific	430.27	219.16	219.16	5.52	13	>sp|P11717|MPRI_HUMAN Cation-independent mannose-6-phosphate receptor OS=Homo sapiens OX=9606 GN=IGF2R PE=1 SV=3	12317	20210911_zy_cell_ethcd_2.2440.2440.2	controllerType=0 controllerNumber=1 scan=2440	11.4243
02369:3	4	K.NN[+3081.095]HTASILDR.M	HexNAc(6)Hex(7)Fuc(1)NeuAc(2)	N[+3081]	1407.9	3	4221.67	4221.67	0	0.4	129	Specific	430.27	218.47	218.47	5.37	21	>sp|P08962|CD63_HUMAN CD63 antigen OS=Homo sapiens OX=9606 GN=CD63 PE=1 SV=2	5151	20210911_zy_cell_ethcd_2.2610.2610.3	controllerType=0 controllerNumber=1 scan=2610	12.2033
01728:2	21	K.N[+1540.529]QSVPLSC[+57.021]C[+57.021]R.E	HexNAc(2)Hex(7)	C[+57]*2, N[+1541]	1381.04	2	2761.08	2761.08	0	-0.1	167	Specific	430.86	272.42	272.42	5.84	7	>sp|O60637|TSN3_HUMAN Tetraspanin-3 OS=Homo sapiens OX=9606 GN=TSPAN3 PE=2 SV=1	16532	20210911_zy_cell_ethcd_2.1907.1907.2	controllerType=0 controllerNumber=1 scan=1907	9.0088
03158:3	27	R.LEN[+1378.476]ITTGTYTIHAQK.E	HexNAc(2)Hex(6)	N[+1378]	1023.46	3	3068.35	3068.36	0	-1	367	Specific	432.44	255.79	255.79	5.95	4	>sp|Q5JPE7|NOMO2_HUMAN Nodal modulator 2 OS=Homo sapiens OX=9606 GN=NOMO2 PE=1 SV=1	6463	20210911_zy_cell_ethcd_2.3477.3477.3	controllerType=0 controllerNumber=1 scan=3477	16.1607
01871:3	4	K.NN[+2059.735]HTASILDR.M	HexNAc(4)Hex(5)Fuc(1)NeuAc(1)	N[+2060]	1067.44	3	3200.31	3200.31	0	-0.7	129	Specific	436.71	215.45	215.45	5.86	21	>sp|P08962|CD63_HUMAN CD63 antigen OS=Homo sapiens OX=9606 GN=CD63 PE=1 SV=2	5151	20210911_zy_cell_ethcd_2.2064.2064.3	controllerType=0 controllerNumber=1 scan=2064	9.7329
02923:3	7	R.N[+1864.634]ISGVVLADHSGAFHNK.Y	HexNAc(2)Hex(9)	N[+1865]	1210.85	3	3630.53	3630.53	0	0	435	Specific	441.19	321.97	321.97	6.57	12	>sp|Q92542|NICA_HUMAN Nicastrin OS=Homo sapiens OX=9606 GN=NCSTN PE=1 SV=2	7240	20210911_zy_cell_ethcd_2.3219.3219.3	controllerType=0 controllerNumber=1 scan=3219	14.9776
02894:3	2	K.LRNPC[+57.021]TSEQN[+1864.634]C[+57.021]TSPFSYK.N	HexNAc(2)Hex(9)	C[+57]*2, N[+1865]	1351.87	3	4053.61	4053.61	0	0	203	Specific	444.23	374.27	374.27	6.73	27	>sp|P05556|ITB1_HUMAN Integrin beta-1 OS=Homo sapiens OX=9606 GN=ITGB1 PE=1 SV=2	3061	20210911_zy_cell_ethcd_2.3187.3187.3	controllerType=0 controllerNumber=1 scan=3187	14.8332
02619:3	5	R.THN[+1540.529]LTDLSPHLR.Y	HexNAc(2)Hex(7)	N[+1541]	982.093	3	2944.27	2944.27	0	-0.7	977	Specific	445.91	298.71	298.71	5.79	22	>sp|P32004|L1CAM_HUMAN Neural cell adhesion molecule L1 OS=Homo sapiens OX=9606 GN=L1CAM PE=1 SV=2	3537	20210911_zy_cell_ethcd_2.2885.2885.3	controllerType=0 controllerNumber=1 scan=2885	13.4583
01781:3	7	K.PIN[+1540.529]TTGTLKPDDR.V	HexNAc(2)Hex(7)	N[+1541]	990.096	3	2968.27	2968.28	0	-0.9	262	Specific	448.15	288.82	288.82	6	12	>sp|Q92542|NICA_HUMAN Nicastrin OS=Homo sapiens OX=9606 GN=NCSTN PE=1 SV=2	7240	20210911_zy_cell_ethcd_2.1965.1965.3	controllerType=0 controllerNumber=1 scan=1965	9.2742
01842:3	4	K.NN[+2789.999]HTASILDR.M	HexNAc(6)Hex(7)Fuc(1)NeuAc(1)	N[+2790]	1310.86	3	3930.57	3930.57	0	-0.5	129	Specific	456.79	238.03	238.03	5.83	21	>sp|P08962|CD63_HUMAN CD63 antigen OS=Homo sapiens OX=9606 GN=CD63 PE=1 SV=2	5151	20210911_zy_cell_ethcd_2.2032.2032.3	controllerType=0 controllerNumber=1 scan=2032	9.5885
03723:3	3	K.VASVININPN[+2059.735]TTHSTGSC[+57.021]R.S	HexNAc(4)Hex(5)Fuc(1)NeuAc(1)	C[+57], N[+2060]	1363.25	3	4087.73	4087.73	0	-0.1	248	Specific	460.46	343.69	343.69	6.67	24	>sp|P13473|LAMP2_HUMAN Lysosome-associated membrane glycoprotein 2 OS=Homo sapiens OX=9606 GN=LAMP2 PE=1 SV=2	6694	20210911_zy_cell_ethcd_2.4098.4098.3	controllerType=0 controllerNumber=1 scan=4098	19.0013
01350:2	61	K.N[+1702.581]YTADYDK.A	HexNAc(2)Hex(8)	N[+1703]	1346.5	2	2692	2692	0	0.1	106	Specific	464.07	354.88	354.88	5.14	2	>sp|O94905|ERLN2_HUMAN Erlin-2 OS=Homo sapiens OX=9606 GN=ERLIN2 PE=1 SV=1	5719	20210911_zy_cell_ethcd_2.1491.1491.2	controllerType=0 controllerNumber=1 scan=1491	7.0815
05286:2	55	K.QNNGAFN[+203.079]ETLFR.N	HexNAc(1)	N[+203]	807.379	2	1613.75	1613.76	0	-2.4	721	Specific	464.3	373.26	373.26	5.38	4	>sp|P02786|TFR1_HUMAN Transferrin receptor protein 1 OS=Homo sapiens OX=9606 GN=TFRC PE=1 SV=2	16028	20210911_zy_cell_ethcd_2.5816.5816.2	controllerType=0 controllerNumber=1 scan=5816	26.823
02609:3	5	R.THN[+1864.634]LTDLSPHLR.Y	HexNAc(2)Hex(9)	N[+1865]	1090.13	3	3268.37	3268.37	0	-0.5	977	Specific	466.79	301.42	301.42	5.79	22	>sp|P32004|L1CAM_HUMAN Neural cell adhesion molecule L1 OS=Homo sapiens OX=9606 GN=L1CAM PE=1 SV=2	3537	20210911_zy_cell_ethcd_2.2874.2874.3	controllerType=0 controllerNumber=1 scan=2874	13.4104
02233:3	6	R.SEN[+1864.634]ASLVLSSSNQK.R	HexNAc(2)Hex(9)	N[+1865]	1110.13	3	3328.37	3328.37	0	-0.5	1111	Specific	470.16	365.81	365.81	5.91	15	>sp|P56199|ITA1_HUMAN Integrin alpha-1 OS=Homo sapiens OX=9606 GN=ITGA1 PE=1 SV=2	9701	20210911_zy_cell_ethcd_2.2461.2461.3	controllerType=0 controllerNumber=1 scan=2461	11.5157
01687:3	28	K.EQYIHEN[+1702.581]YSR.A	HexNAc(2)Hex(8)	N[+1703]	1014.4	3	3041.19	3041.19	0	-1.1	542	Specific	470.99	296.52	296.52	6.03	5	>sp|O60568|PLOD3_HUMAN Multifunctional procollagen lysine hydroxylase and glycosyltransferase LH3 OS=Homo sapiens OX=9606 GN=PLOD3 PE=1 SV=1	10856	20210911_zy_cell_ethcd_2.1862.1862.3	controllerType=0 controllerNumber=1 scan=1862	8.7986
03981:3	15	R.N[+2026.687]HSIFLADINQER.G	HexNAc(2)Hex(10)	N[+2027]	1195.16	3	3583.47	3583.47	0	0	197	Specific	475.48	329.86	329.86	5.58	6	>sp|P50897|PPT1_HUMAN Palmitoyl-protein thioesterase 1 OS=Homo sapiens OX=9606 GN=PPT1 PE=1 SV=1	7591	20210911_zy_cell_ethcd_2.4381.4381.3	controllerType=0 controllerNumber=1 scan=4381	20.2708
03260:3	1	R.GHTLTLN[+1378.476]FTR.N	HexNAc(2)Hex(6)	N[+1378]	846.702	3	2538.09	2538.1	0	-2	97	Specific	479.04	313.48	313.48	6.03	48	>sp|P11279|LAMP1_HUMAN Lysosome-associated membrane glycoprotein 1 OS=Homo sapiens OX=9606 GN=LAMP1 PE=1 SV=3	4405	20210911_zy_cell_ethcd_2.3589.3589.3	controllerType=0 controllerNumber=1 scan=3589	16.6747
01710:3	28	K.EQYIHEN[+1378.476]YSR.A	HexNAc(2)Hex(6)	N[+1378]	906.365	3	2717.08	2717.08	0	-0.4	542	Specific	479.71	311.15	311.15	5.89	5	>sp|O60568|PLOD3_HUMAN Multifunctional procollagen lysine hydroxylase and glycosyltransferase LH3 OS=Homo sapiens OX=9606 GN=PLOD3 PE=1 SV=1	10856	20210911_zy_cell_ethcd_2.1887.1887.3	controllerType=0 controllerNumber=1 scan=1887	8.9137
02243:3	6	R.SEN[+1702.581]ASLVLSSSNQK.R	HexNAc(2)Hex(8)	N[+1703]	1056.11	3	3166.31	3166.32	0	-1	1111	Specific	479.78	335.84	335.84	5.29	15	>sp|P56199|ITA1_HUMAN Integrin alpha-1 OS=Homo sapiens OX=9606 GN=ITGA1 PE=1 SV=2	9701	20210911_zy_cell_ethcd_2.2472.2472.3	controllerType=0 controllerNumber=1 scan=2472	11.5656
01948:3	49	K.YHVLHIN[+1872.651]TTK.N	HexNAc(3)Hex(6)NeuAc(1)	N[+1873]	1033.44	3	3098.31	3098.32	0	-1.4	102	Specific	484.35	265.61	265.61	6.01	3	>sp|Q7LGA3|HS2ST_HUMAN Heparan sulfate 2-O-sulfotransferase 1 OS=Homo sapiens OX=9606 GN=HS2ST1 PE=1 SV=1	4219	20210911_zy_cell_ethcd_2.2148.2148.3	controllerType=0 controllerNumber=1 scan=2148	10.1127
02872:3	2	R.NPC[+57.021]TSEQN[+2026.687]C[+57.021]TSPFSYK.N	HexNAc(2)Hex(10)	C[+57]*2, N[+2027]	1316.16	3	3946.48	3946.48	0	0.6	205	Specific	486.65	442.44	442.44	5.57	27	>sp|P05556|ITB1_HUMAN Integrin beta-1 OS=Homo sapiens OX=9606 GN=ITGB1 PE=1 SV=2	3061	20210911_zy_cell_ethcd_2.3163.3163.3	controllerType=0 controllerNumber=1 scan=3163	14.7242
01081:3	2	K.C[+57.021]HEGN[+1864.634]GTFEC[+57.021]GAC[+57.021]R.C	HexNAc(2)Hex(9)	C[+57]*3, N[+1865]	1173.75	3	3519.25	3519.25	0	-1.1	477	Specific	487.9	442.04	442.04	6.98	27	>sp|P05556|ITB1_HUMAN Integrin beta-1 OS=Homo sapiens OX=9606 GN=ITGB1 PE=1 SV=2	3061	20210911_zy_cell_ethcd_2.1195.1195.3	controllerType=0 controllerNumber=1 scan=1195	5.6942
01085:3	2	K.C[+57.021]HEGN[+1864.634]GTFEC[+57.021]GAC[+57.021]R.C	HexNAc(2)Hex(9)	C[+57]*3, N[+1865]	1173.75	3	3519.25	3519.25	0	-0.4	477	Specific	491.96	484.09	484.09	6.84	27	>sp|P05556|ITB1_HUMAN Integrin beta-1 OS=Homo sapiens OX=9606 GN=ITGB1 PE=1 SV=2	3061	20210911_zy_cell_ethcd_2.1200.1200.3	controllerType=0 controllerNumber=1 scan=1200	5.716
02888:3	3	K.VASVININPN[+1565.560]TTHSTGSC[+57.021]R.S	HexNAc(3)Hex(5)Fuc(1)	C[+57], N[+1566]	1198.52	3	3593.55	3593.55	0	-1	248	Specific	496.33	361.47	361.47	6.54	24	>sp|P13473|LAMP2_HUMAN Lysosome-associated membrane glycoprotein 2 OS=Homo sapiens OX=9606 GN=LAMP2 PE=1 SV=2	6694	20210911_zy_cell_ethcd_2.3180.3180.3	controllerType=0 controllerNumber=1 scan=3180	14.8024
01943:3	14	R.EAGN[+1768.640]HTSGAGLVQINK.S	HexNAc(4)Hex(5)Fuc(1)	N[+1769]	1122.15	3	3364.45	3364.45	0	-1.2	80	Specific	498.44	341.95	295.62	6.36	8	>sp|P20645|MPRD_HUMAN Cation-dependent mannose-6-phosphate receptor OS=Homo sapiens OX=9606 GN=M6PR PE=1 SV=1	11960	20210911_zy_cell_ethcd_2.2143.2143.3	controllerType=0 controllerNumber=1 scan=2143	10.0877
04011:3	15	R.N[+1864.634]HSIFLADINQER.G	HexNAc(2)Hex(9)	N[+1865]	1141.14	3	3421.41	3421.42	0	-0.8	197	Specific	498.55	362.16	362.16	6.84	6	>sp|P50897|PPT1_HUMAN Palmitoyl-protein thioesterase 1 OS=Homo sapiens OX=9606 GN=PPT1 PE=1 SV=1	7591	20210911_zy_cell_ethcd_2.4414.4414.3	controllerType=0 controllerNumber=1 scan=4414	20.4221
02903:3	2	K.LRNPC[+57.021]TSEQN[+2026.687]C[+57.021]TSPFSYK.N	HexNAc(2)Hex(10)	C[+57]*2, N[+2027]	1405.89	3	4215.66	4215.66	0	-0.2	203	Specific	499.48	424.81	424.81	6.89	27	>sp|P05556|ITB1_HUMAN Integrin beta-1 OS=Homo sapiens OX=9606 GN=ITGB1 PE=1 SV=2	3061	20210911_zy_cell_ethcd_2.3197.3197.3	controllerType=0 controllerNumber=1 scan=3197	14.8765
03266:3	14	R.EAGN[+2350.830]HTSGAGLVQINK.S	HexNAc(4)Hex(5)Fuc(1)NeuAc(2)	N[+2351]	1316.22	3	3946.64	3946.64	0	-0.6	80	Specific	503.85	327.32	327.32	6.22	8	>sp|P20645|MPRD_HUMAN Cation-dependent mannose-6-phosphate receptor OS=Homo sapiens OX=9606 GN=M6PR PE=1 SV=1	11960	20210911_zy_cell_ethcd_2.3596.3596.3	controllerType=0 controllerNumber=1 scan=3596	16.7063
04782:3	24	R.TILVDNNTWN[+1702.581]NTHISR.V	HexNAc(2)Hex(8)	N[+1703]	1200.85	3	3600.53	3600.53	0	0.4	539	Specific	511.68	366.92	81.48	6.35	4	>sp|P46977|STT3A_HUMAN Dolichyl-diphosphooligosaccharide--protein glycosyltransferase subunit STT3A OS=Homo sapiens OX=9606 GN=STT3A PE=1 SV=2	18762	20210911_zy_cell_ethcd_2.5262.5262.3	controllerType=0 controllerNumber=1 scan=5262	24.3121
02844:3	3	K.VASVININPN[+1581.555]TTHSTGSC[+57.021]R.S	HexNAc(3)Hex(6)	C[+57], N[+1582]	1203.85	3	3609.55	3609.55	0	-0.4	248	Specific	512.43	376.15	376.15	7.45	24	>sp|P13473|LAMP2_HUMAN Lysosome-associated membrane glycoprotein 2 OS=Homo sapiens OX=9606 GN=LAMP2 PE=1 SV=2	6694	20210911_zy_cell_ethcd_2.3132.3132.3	controllerType=0 controllerNumber=1 scan=3132	14.5853
02446:3	83	R.GYYN[+2350.830]QSEAGSHTLQR.M	HexNAc(4)Hex(5)Fuc(1)NeuAc(2)	N[+2351]	1354.54	3	4061.61	4061.61	0	-0.2	107	Specific	525.4	102.01	102.01	5.95	2	>sp|Q29836|1B67_HUMAN HLA class I histocompatibility antigen, B-67 alpha chain OS=Homo sapiens OX=9606 GN=HLA-B PE=1 SV=1	223	20210911_zy_cell_ethcd_2.2695.2695.3	controllerType=0 controllerNumber=1 scan=2695	12.5902
02570:4	46	K.PGN[+1864.634]LSRPPPVVVPHQPR.L	HexNAc(2)Hex(9)	N[+1865]	928.673	4	3711.67	3711.67	0	-0.9	487	Specific	527.03	456.22	456.22	7.51	4	>sp|Q9BU23|LMF2_HUMAN Lipase maturation factor 2 OS=Homo sapiens OX=9606 GN=LMF2 PE=1 SV=2	7424	20210911_zy_cell_ethcd_2.2831.2831.4	controllerType=0 controllerNumber=1 scan=2831	13.2163
03186:3	14	R.EAGN[+2350.830]HTSGAGLVQINK.S	HexNAc(4)Hex(5)Fuc(1)NeuAc(2)	N[+2351]	1316.22	3	3946.64	3946.64	0	-0.6	80	Specific	532.15	385.53	385.53	6.9	8	>sp|P20645|MPRD_HUMAN Cation-dependent mannose-6-phosphate receptor OS=Homo sapiens OX=9606 GN=M6PR PE=1 SV=1	11960	20210911_zy_cell_ethcd_2.3508.3508.3	controllerType=0 controllerNumber=1 scan=3508	16.3021
03246:3	1	R.GHTLTLN[+1540.529]FTR.N	HexNAc(2)Hex(7)	N[+1541]	900.721	3	2700.15	2700.15	0	-0.4	97	Specific	535.85	354.58	354.58	6.17	48	>sp|P11279|LAMP1_HUMAN Lysosome-associated membrane glycoprotein 1 OS=Homo sapiens OX=9606 GN=LAMP1 PE=1 SV=3	4405	20210911_zy_cell_ethcd_2.3574.3574.3	controllerType=0 controllerNumber=1 scan=3574	16.6041
02855:3	2	R.NPC[+57.021]TSEQN[+2026.687]C[+57.021]TSPFSYK.N	HexNAc(2)Hex(10)	C[+57]*2, N[+2027]	1316.16	3	3946.48	3946.48	0	0.7	205	Specific	553.4	467.77	467.77	5.63	27	>sp|P05556|ITB1_HUMAN Integrin beta-1 OS=Homo sapiens OX=9606 GN=ITGB1 PE=1 SV=2	3061	20210911_zy_cell_ethcd_2.3144.3144.3	controllerType=0 controllerNumber=1 scan=3144	14.6418
04762:3	24	R.TILVDNNTWN[+1864.634]NTHISR.V	HexNAc(2)Hex(9)	N[+1865]	1254.87	3	3762.58	3762.59	0	-0.6	539	Specific	556.42	401.58	86.15	6.9	4	>sp|P46977|STT3A_HUMAN Dolichyl-diphosphooligosaccharide--protein glycosyltransferase subunit STT3A OS=Homo sapiens OX=9606 GN=STT3A PE=1 SV=2	18762	20210911_zy_cell_ethcd_2.5240.5240.3	controllerType=0 controllerNumber=1 scan=5240	24.2105
02467:3	71	K.DGSDEPGTAAC[+57.021]PN[+1378.476]GSFHC[+57.021]TNTGYK.P	HexNAc(2)Hex(6)	C[+57]*2, N[+1378]	1307.84	3	3921.5	3921.5	0	-0.1	60	Specific	558.4	528.64	528.64	6.95	1	>sp|P14314|GLU2B_HUMAN Glucosidase 2 subunit beta OS=Homo sapiens OX=9606 GN=PRKCSH PE=1 SV=2	3879	20210911_zy_cell_ethcd_2.2718.2718.3	controllerType=0 controllerNumber=1 scan=2718	12.6983
02861:3	3	K.VASVININPN[+1581.555]TTHSTGSC[+57.021]R.S	HexNAc(3)Hex(6)	C[+57], N[+1582]	1203.85	3	3609.54	3609.55	0	-1	248	Specific	560.32	393.47	393.47	7.96	24	>sp|P13473|LAMP2_HUMAN Lysosome-associated membrane glycoprotein 2 OS=Homo sapiens OX=9606 GN=LAMP2 PE=1 SV=2	6694	20210911_zy_cell_ethcd_2.3151.3151.3	controllerType=0 controllerNumber=1 scan=3151	14.6711
02878:3	2	R.NPC[+57.021]TSEQN[+1702.581]C[+57.021]TSPFSYK.N	HexNAc(2)Hex(8)	C[+57]*2, N[+1703]	1208.13	3	3622.37	3622.37	0	-0.9	205	Specific	565.58	508.97	508.97	6.57	27	>sp|P05556|ITB1_HUMAN Integrin beta-1 OS=Homo sapiens OX=9606 GN=ITGB1 PE=1 SV=2	3061	20210911_zy_cell_ethcd_2.3169.3169.3	controllerType=0 controllerNumber=1 scan=3169	14.7546
02933:3	7	R.N[+1702.581]ISGVVLADHSGAFHNK.Y	HexNAc(2)Hex(8)	N[+1703]	1156.83	3	3468.48	3468.48	0	-0.8	435	Specific	569.2	429.5	429.5	7.86	12	>sp|Q92542|NICA_HUMAN Nicastrin OS=Homo sapiens OX=9606 GN=NCSTN PE=1 SV=2	7240	20210911_zy_cell_ethcd_2.3230.3230.3	controllerType=0 controllerNumber=1 scan=3230	15.0309
02841:3	3	K.VASVININPN[+1378.476]TTHSTGSC[+57.021]R.S	HexNAc(2)Hex(6)	C[+57], N[+1378]	1136.16	3	3406.47	3406.47	0	-0.5	248	Specific	572.65	435.93	435.93	7.96	24	>sp|P13473|LAMP2_HUMAN Lysosome-associated membrane glycoprotein 2 OS=Homo sapiens OX=9606 GN=LAMP2 PE=1 SV=2	6694	20210911_zy_cell_ethcd_2.3129.3129.3	controllerType=0 controllerNumber=1 scan=3129	14.5701
02873:3	2	R.NPC[+57.021]TSEQN[+1864.634]C[+57.021]TSPFSYK.N	HexNAc(2)Hex(9)	C[+57]*2, N[+1865]	1262.15	3	3784.42	3784.42	0	-0.1	205	Specific	576.53	517.81	517.81	6.57	27	>sp|P05556|ITB1_HUMAN Integrin beta-1 OS=Homo sapiens OX=9606 GN=ITGB1 PE=1 SV=2	3061	20210911_zy_cell_ethcd_2.3164.3164.3	controllerType=0 controllerNumber=1 scan=3164	14.7292
02892:3	3	K.VASVININPN[+1565.560]TTHSTGSC[+57.021]R.S	HexNAc(3)Hex(5)Fuc(1)	C[+57], N[+1566]	1198.52	3	3593.55	3593.55	0	-1.1	248	Specific	577.26	431.38	431.38	8.1	24	>sp|P13473|LAMP2_HUMAN Lysosome-associated membrane glycoprotein 2 OS=Homo sapiens OX=9606 GN=LAMP2 PE=1 SV=2	6694	20210911_zy_cell_ethcd_2.3185.3185.3	controllerType=0 controllerNumber=1 scan=3185	14.8237
03271:4	13	R.IAPASN[+1864.634]VSHTVVLRPLK.A	HexNAc(2)Hex(9)	N[+1865]	917.429	4	3666.69	3666.7	0	-1.2	83	Specific	580.09	522.83	522.83	7.19	6	>sp|P43308|SSRB_HUMAN Translocon-associated protein subunit beta OS=Homo sapiens OX=9606 GN=SSR2 PE=1 SV=1	13071	20210911_zy_cell_ethcd_2.3601.3601.3	controllerType=0 controllerNumber=1 scan=3601	16.7294
00962:5	42	K.YPHNHHVVN[+1864.634]NTLEGN[+1702.581]C[+57.021]SSK.S	HexNAc(2)Hex(9),HexNAc(2)Hex(8)	C[+57], N[+1703][+1865]	1155.65	5	5774.21	5774.22	0	-1.1	103	Specific	622.01	532.15	165.77	9.1	4	>sp|P15586|GNS_HUMAN N-acetylglucosamine-6-sulfatase OS=Homo sapiens OX=9606 GN=GNS PE=1 SV=3	5993	20210911_zy_cell_ethcd_2.1064.1064.5	controllerType=0 controllerNumber=1 scan=1064	5.0709
03317:3	43	K.GQTEIQVNC[+57.021]PPAVTEN[+1540.529]K.T	HexNAc(2)Hex(7)	C[+57], N[+1541]	1142.48	3	3425.44	3425.44	0	-0.8	56	Specific	639.43	502.71	502.71	8.17	3	>sp|Q16563|SYPL1_HUMAN Synaptophysin-like protein 1 OS=Homo sapiens OX=9606 GN=SYPL1 PE=1 SV=1	16250	20210911_zy_cell_ethcd_2.3652.3652.3	controllerType=0 controllerNumber=1 scan=3652	16.959
02743:4	9	R.FTFTSHTPGEHQIC[+57.021]LHSN[+1378.476]STK.F	HexNAc(2)Hex(6)	C[+57], N[+1378]	952.656	4	3807.6	3807.61	0	-1	108	Specific	663.23	599.4	599.4	9.3	5	>sp|Q9BVK6|TMED9_HUMAN Transmembrane emp24 domain-containing protein 9 OS=Homo sapiens OX=9606 GN=TMED9 PE=1 SV=2	14554	20210911_zy_cell_ethcd_2.3021.3021.3	controllerType=0 controllerNumber=1 scan=3021	14.0776
01438:3	38	K.SQNRPQGQSTQPSNAAGTN[+203.079]TTSASTPR.S	HexNAc(1)	N[+203]	983.129	3	2947.37	2947.37	0	-0.8	104	Specific	673.01	636.27	636.27	9.55	2	>sp|Q9UHD9|UBQL2_HUMAN Ubiquilin-2 OS=Homo sapiens OX=9606 GN=UBQLN2 PE=1 SV=2	18505	20210911_zy_cell_ethcd_2.1588.1588.3	controllerType=0 controllerNumber=1 scan=1588	7.5397
00872:2	10	K.N[+1702.581]ATLAEQAK.L	HexNAc(2)Hex(8)	N[+1703]	1324.54	2	2648.08	2648.08	0	0	869	Specific	679.38	427.49	427.49	9.24	14	>sp|Q9Y4L1|HYOU1_HUMAN Hypoxia up-regulated protein 1 OS=Homo sapiens OX=9606 GN=HYOU1 PE=1 SV=1	14756	20210911_zy_cell_ethcd_2.965.965.2	controllerType=0 controllerNumber=1 scan=965	4.5915
02739:4	9	R.FTFTSHTPGEHQIC[+57.021]LHSN[+1540.529]STK.F	HexNAc(2)Hex(7)	C[+57], N[+1541]	993.17	4	3969.66	3969.66	0	-0.4	108	Specific	753.91	660.45	660.45	11.3	5	>sp|Q9BVK6|TMED9_HUMAN Transmembrane emp24 domain-containing protein 9 OS=Homo sapiens OX=9606 GN=TMED9 PE=1 SV=2	14554	20210911_zy_cell_ethcd_2.3017.3017.4	controllerType=0 controllerNumber=1 scan=3017	14.0576
02343:4	18	R.VWQGHAN[+1864.634]ASFC[+57.021]PHGYGC[+57.021]R.T	HexNAc(2)Hex(9)	C[+57]*2, N[+1865]	992.889	4	3968.53	3968.54	0	-0.5	1324	Specific	793.35	714.97	714.97	11.96	8	>sp|O15230|LAMA5_HUMAN Laminin subunit alpha-5 OS=Homo sapiens OX=9606 GN=LAMA5 PE=1 SV=8	2334	20210911_zy_cell_ethcd_2.2582.2582.4	controllerType=0 controllerNumber=1 scan=2582	12.0736
02761:4	9	R.FTFTSHTPGEHQIC[+57.021]LHSN[+1378.476]STK.F	HexNAc(2)Hex(6)	C[+57], N[+1378]	952.656	4	3807.6	3807.61	0	-1.3	108	Specific	837.5	724.84	724.84	12.44	5	>sp|Q9BVK6|TMED9_HUMAN Transmembrane emp24 domain-containing protein 9 OS=Homo sapiens OX=9606 GN=TMED9 PE=1 SV=2	14554	20210911_zy_cell_ethcd_2.3041.3041.4	controllerType=0 controllerNumber=1 scan=3041	14.1717

## Sheet: EThcD-R3
Query #:z	Protein Rank	Peptide < ProteinMetrics Confidential >	Glycans NHFAGNa	Modification Type(s)	Observed m/z	z	Observed (M+H)	Calc. mass (M+H)	Off-by-x error	Mass error (ppm)	Starting position	Cleavage	Score	Delta	Delta Mod	|Log Prob|	# of unique peptides	Protein Name	Protein DB number	Comment	Scan #	Scan Time
07668:3	77	R.N[+1702.581]C[+57.021]SAAPQPEPAAGLASYPELR.L	HexNAc(2)Hex(8)	C[+57], N[+1703]	1301.22	3	3901.64	3901.63	0	1.1	87	Specific	200.35	200.35	200.35	3.68	3	>sp|O75718|CRTAP_HUMAN Cartilage-associated protein OS=Homo sapiens OX=9606 GN=CRTAP PE=1 SV=1	8728	20210911_zy_cell_ethcd_3.8519.8519.3	controllerType=0 controllerNumber=1 scan=8519	38.8677
01850:3	74	R.DLGPTLAN[+1702.581]STHHNVR.L	HexNAc(2)Hex(8)	N[+1703]	1112.14	3	3334.4	3334.41	0	-0.7	302	Specific	200.38	70.95	70.95	3.68	3	>sp|P04062|GLCM_HUMAN Lysosomal acid glucosylceramidase OS=Homo sapiens OX=9606 GN=GBA PE=1 SV=3	6280	20210911_zy_cell_ethcd_3.2040.2040.3	controllerType=0 controllerNumber=1 scan=2040	9.6017
01880:3	5	K.VPGN[+2059.735]QTSTTLK.L	HexNAc(4)Hex(5)Fuc(1)NeuAc(1)	N[+2060]	1069.12	3	3205.35	3205.35	0	-1	668	Specific	200.98	66.53	66.53	3.69	23	>sp|P32004|L1CAM_HUMAN Neural cell adhesion molecule L1 OS=Homo sapiens OX=9606 GN=L1CAM PE=1 SV=2	3537	20210911_zy_cell_ethcd_3.2073.2073.3	controllerType=0 controllerNumber=1 scan=2073	9.7463
05848:3	39	R.LSAVNSIFLSHN[+2059.735]NTK.E	HexNAc(4)Hex(5)Fuc(1)NeuAc(1)	N[+2060]	1235.54	3	3704.6	3704.61	0	-0.9	442	Specific	201.06	100.51	100.51	4.68	6	>sp|P48960|CD97_HUMAN CD97 antigen OS=Homo sapiens OX=9606 GN=CD97 PE=1 SV=4	8146	20210911_zy_cell_ethcd_3.6443.6443.3	controllerType=0 controllerNumber=1 scan=6443	29.6223
01105:3	11	R.TLSRPSETC[+57.021]N[+1864.634]ETTK.L	HexNAc(2)Hex(9)	C[+57], N[+1865]	1163.47	3	3488.4	3488.4	0	-0.6	384	Specific	201.16	118.5	118.5	4.39	9	>sp|Q96AY3|FKB10_HUMAN Peptidyl-prolyl cis-trans isomerase FKBP10 OS=Homo sapiens OX=9606 GN=FKBP10 PE=1 SV=1	19614	20210911_zy_cell_ethcd_3.1221.1221.3	controllerType=0 controllerNumber=1 scan=1221	5.8059
02070:2	69	R.N[+1864.634]WTITR.L	HexNAc(2)Hex(9)	N[+1865]	1328.03	2	2655.06	2655.05	0	0.9	651	Specific	201.2	30.38	30.38	1.66	5	>sp|P19022|CADH2_HUMAN Cadherin-2 OS=Homo sapiens OX=9606 GN=CDH2 PE=1 SV=4	1389	20210911_zy_cell_ethcd_3.2281.2281.2	controllerType=0 controllerNumber=1 scan=2281	10.6823
01557:3	20	K.KKPN[+2350.830]ATAEPTPPDR.W	HexNAc(4)Hex(5)Fuc(1)NeuAc(2)	N[+2351]	1291.55	3	3872.63	3872.63	0	-1.2	361	Specific	202.01	39.44	39.44	3.7	12	>sp|Q9UBG0|MRC2_HUMAN C-type mannose receptor 2 OS=Homo sapiens OX=9606 GN=MRC2 PE=1 SV=2	16756	20210911_zy_cell_ethcd_3.1718.1718.3	controllerType=0 controllerNumber=1 scan=1718	8.1196
01134:2	40	K.GPTN[+1864.634]NTC[+57.021]VVR.T	HexNAc(2)Hex(9)	C[+57], N[+1865]	1491.59	2	2982.17	2982.18	0	-0.5	1438	Specific	204.04	63.68	63.68	3.92	4	>sp|Q8TEM1|PO210_HUMAN Nuclear pore membrane glycoprotein 210 OS=Homo sapiens OX=9606 GN=NUP210 PE=1 SV=3	3187	20210911_zy_cell_ethcd_3.1253.1253.2	controllerType=0 controllerNumber=1 scan=1253	5.9554
02555:3	10	R.IAPASN[+1864.634]VSHTVVLR.P	HexNAc(2)Hex(9)	N[+1865]	1110.16	3	3328.47	3328.47	0	-0.5	83	Specific	205.34	101.49	101.49	3.95	7	>sp|P43308|SSRB_HUMAN Translocon-associated protein subunit beta OS=Homo sapiens OX=9606 GN=SSR2 PE=1 SV=1	13071	20210911_zy_cell_ethcd_3.2814.2814.3	controllerType=0 controllerNumber=1 scan=2814	13.1247
02712:3	48	R.EQIN[+2026.687]ITLDHR.C	HexNAc(2)Hex(10)	N[+2027]	1089.12	3	3265.33	3265.34	0	-0.7	194	Specific	205.42	96.63	96.63	4.21	6	>sp|Q02809|PLOD1_HUMAN Procollagen-lysine,2-oxoglutarate 5-dioxygenase 1 OS=Homo sapiens OX=9606 GN=PLOD1 PE=1 SV=2	10199	20210911_zy_cell_ethcd_3.2986.2986.3	controllerType=0 controllerNumber=1 scan=2986	13.9011
02301:3	2	R.LLNINPN[+2864.036]K.T	HexNAc(7)Hex(8)Fuc(1)	N[+2864]	1263.86	3	3789.58	3789.58	0	-1.5	255	Specific	205.83	71.78	71.78	2.97	45	>sp|P11279|LAMP1_HUMAN Lysosome-associated membrane glycoprotein 1 OS=Homo sapiens OX=9606 GN=LAMP1 PE=1 SV=3	4405	20210911_zy_cell_ethcd_3.2535.2535.3	controllerType=0 controllerNumber=1 scan=2535	11.8427
00789:3	101	K.AGHFQN[+1864.634]TSSPSAR.C	HexNAc(2)Hex(9)	N[+1865]	1075.43	3	3224.27	3224.27	0	-0.5	172	Specific	206.05	113.88	113.88	4.39	1	>sp|P36941|TNR3_HUMAN Tumor necrosis factor receptor superfamily member 3 OS=Homo sapiens OX=9606 GN=LTBR PE=1 SV=1	18416	20210911_zy_cell_ethcd_3.872.872.3	controllerType=0 controllerNumber=1 scan=872	4.1496
01049:3	125	K.LLHAYN[+2026.687]R.T	HexNAc(2)Hex(10)	N[+2027]	971.73	3	2913.17	2913.18	0	-0.7	119	Specific	206.62	72.11	72.11	3.75	2	>sp|Q13214|SEM3B_HUMAN Semaphorin-3B OS=Homo sapiens OX=9606 GN=SEMA3B PE=2 SV=1	16209	20210911_zy_cell_ethcd_3.1159.1159.3	controllerType=0 controllerNumber=1 scan=1159	5.5038
01943:2	16	R.VN[+1702.581]NTLSSQISR.L	HexNAc(2)Hex(8)	N[+1703]	1461.12	2	2921.22	2921.22	0	-0.2	1106	Specific	206.7	98.57	98.57	4.21	11	>sp|P11047|LAMC1_HUMAN Laminin subunit gamma-1 OS=Homo sapiens OX=9606 GN=LAMC1 PE=1 SV=3	4746	20210911_zy_cell_ethcd_3.2142.2142.2	controllerType=0 controllerNumber=1 scan=2142	10.0554
01186:2	40	K.GPTN[+1540.529]NTC[+57.021]VVR.T	HexNAc(2)Hex(7)	C[+57], N[+1541]	1329.54	2	2658.07	2658.07	0	0.1	1438	Specific	208.08	83.5	83.5	4.21	4	>sp|Q8TEM1|PO210_HUMAN Nuclear pore membrane glycoprotein 210 OS=Homo sapiens OX=9606 GN=NUP210 PE=1 SV=3	3187	20210911_zy_cell_ethcd_3.1310.1310.2	controllerType=0 controllerNumber=1 scan=1310	6.2266
02660:2	52	K.GFN[+1864.634]ASYIR.V	HexNAc(2)Hex(9)	N[+1865]	1396.55	2	2792.1	2792.1	0	-0.7	141	Specific	208.67	56.12	56.12	3.65	9	>sp|Q86SQ4|AGRG6_HUMAN Adhesion G-protein coupled receptor G6 OS=Homo sapiens OX=9606 GN=ADGRG6 PE=1 SV=3	642	20210911_zy_cell_ethcd_3.2929.2929.2	controllerType=0 controllerNumber=1 scan=2929	13.6402
05473:3	45	K.GELN[+1702.581]TSIFSSRPIDK.F	HexNAc(2)Hex(8)	N[+1703]	1122.82	3	3366.45	3366.45	0	0	350	Specific	209.24	73.9	73.9	3.72	5	>sp|Q9UHG3|PCYOX_HUMAN Prenylcysteine oxidase 1 OS=Homo sapiens OX=9606 GN=PCYOX1 PE=1 SV=3	9384	20210911_zy_cell_ethcd_3.6025.6025.3	controllerType=0 controllerNumber=1 scan=6025	27.7487
01374:2	4	K.NN[+1540.529]HTASILDR.M	HexNAc(2)Hex(7)	N[+1541]	1341.05	2	2681.1	2681.1	0	-0.6	129	Specific	209.25	132.43	132.43	4.33	19	>sp|P08962|CD63_HUMAN CD63 antigen OS=Homo sapiens OX=9606 GN=CD63 PE=1 SV=2	5151	20210911_zy_cell_ethcd_3.1517.1517.2	controllerType=0 controllerNumber=1 scan=1517	7.2032
01793:2	24	R.YN[+1378.476]C[+57.021]SIESPR.K	HexNAc(2)Hex(6)	C[+57], N[+1378]	1252.49	2	2503.98	2503.97	0	0.3	695	Specific	210.32	115.08	115.08	4.21	7	>sp|O00469|PLOD2_HUMAN Procollagen-lysine,2-oxoglutarate 5-dioxygenase 2 OS=Homo sapiens OX=9606 GN=PLOD2 PE=1 SV=2	15649	20210911_zy_cell_ethcd_3.1977.1977.2	controllerType=0 controllerNumber=1 scan=1977	9.3128
03204:2	2	R.GHTLTLN[+892.317]FTR.N	HexNAc(2)Hex(3)	N[+892]	1026.47	2	2051.94	2051.94	0	-0.7	97	Specific	211.19	155.77	155.77	4.33	45	>sp|P11279|LAMP1_HUMAN Lysosome-associated membrane glycoprotein 1 OS=Homo sapiens OX=9606 GN=LAMP1 PE=1 SV=3	4405	20210911_zy_cell_ethcd_3.3526.3526.2	controllerType=0 controllerNumber=1 scan=3526	16.3717
03302:3	2	R.LLNINPN[+2059.735]K.T	HexNAc(4)Hex(5)Fuc(1)NeuAc(1)	N[+2060]	995.765	3	2985.28	2985.28	0	-0.4	255	Specific	211.31	85.57	85.57	3.3	45	>sp|P11279|LAMP1_HUMAN Lysosome-associated membrane glycoprotein 1 OS=Homo sapiens OX=9606 GN=LAMP1 PE=1 SV=3	4405	20210911_zy_cell_ethcd_3.3634.3634.3	controllerType=0 controllerNumber=1 scan=3634	16.8561
02374:2	89	K.EN[+1864.634]ATTDLLTK.L	HexNAc(2)Hex(9)	N[+1865]	1485.61	2	2970.21	2970.21	0	0	264	Specific	212.35	72.81	72.81	3.92	2	>sp|P28799|GRN_HUMAN Progranulin OS=Homo sapiens OX=9606 GN=GRN PE=1 SV=2	9918	20210911_zy_cell_ethcd_3.2615.2615.2	controllerType=0 controllerNumber=1 scan=2615	12.2079
05932:3	30	R.SAN[+1702.581]STLAQALHWTR.S	HexNAc(2)Hex(8)	N[+1703]	1086.8	3	3258.37	3258.38	0	-1.4	614	Specific	212.4	84.14	84.14	4.68	4	>sp|Q9BU23|LMF2_HUMAN Lipase maturation factor 2 OS=Homo sapiens OX=9606 GN=LMF2 PE=1 SV=2	7424	20210911_zy_cell_ethcd_3.6535.6535.3	controllerType=0 controllerNumber=1 scan=6535	30.0358
05515:3	39	R.RLSAVNSIFLSHN[+2350.830]NTK.E	HexNAc(4)Hex(5)Fuc(1)NeuAc(2)	N[+2351]	1384.6	3	4151.8	4151.8	0	-1.2	441	Specific	214.4	108.12	108.12	4.58	6	>sp|P48960|CD97_HUMAN CD97 antigen OS=Homo sapiens OX=9606 GN=CD97 PE=1 SV=4	8146	20210911_zy_cell_ethcd_3.6072.6072.3	controllerType=0 controllerNumber=1 scan=6072	27.9646
03262:3	5	R.THN[+2059.735]LTDLSPHLR.Y	HexNAc(4)Hex(5)Fuc(1)NeuAc(1)	N[+2060]	1155.16	3	3463.45	3463.47	0	-5.8	977	Specific	214.5	81.03	81.03	3.55	23	>sp|P32004|L1CAM_HUMAN Neural cell adhesion molecule L1 OS=Homo sapiens OX=9606 GN=L1CAM PE=1 SV=2	3537	20210911_zy_cell_ethcd_3.3590.3590.3	controllerType=0 controllerNumber=1 scan=3590	16.6588
02067:2	104	R.DVN[+1378.476]C[+57.021]SVMGPQEK.K	HexNAc(2)Hex(6)	C[+57], N[+1378]	1371.54	2	2742.08	2742.07	0	0.6	51	Specific	214.62	162.04	162.04	3.91	3	>sp|P53634|CATC_HUMAN Dipeptidyl peptidase 1 OS=Homo sapiens OX=9606 GN=CTSC PE=1 SV=2	6868	20210911_zy_cell_ethcd_3.2278.2278.2	controllerType=0 controllerNumber=1 scan=2278	10.6674
02455:2	2	R.LLNINPN[+1727.613]K.T	HexNAc(3)Hex(6)Fuc(1)	N[+1728]	1327.08	2	2653.16	2653.16	0	-0.6	255	Specific	215.7	87.85	87.85	3.79	45	>sp|P11279|LAMP1_HUMAN Lysosome-associated membrane glycoprotein 1 OS=Homo sapiens OX=9606 GN=LAMP1 PE=1 SV=3	4405	20210911_zy_cell_ethcd_3.2704.2704.2	controllerType=0 controllerNumber=1 scan=2704	12.6171
02838:3	74	R.DLGPTLAN[+2350.830]STHHNVR.L	HexNAc(4)Hex(5)Fuc(1)NeuAc(2)	N[+2351]	1328.23	3	3982.67	3982.66	0	2.6	302	Specific	215.76	65.11	65.11	3.43	3	>sp|P04062|GLCM_HUMAN Lysosomal acid glucosylceramidase OS=Homo sapiens OX=9606 GN=GBA PE=1 SV=3	6280	20210911_zy_cell_ethcd_3.3124.3124.3	controllerType=0 controllerNumber=1 scan=3124	14.5321
07472:3	18	R.TTLVDNNTWN[+1702.581]NSHIALVGK.A	HexNAc(2)Hex(8)	N[+1703]	1267.22	3	3799.65	3799.65	0	-0.9	618	Specific	215.81	148.22	91.61	5.47	7	>sp|Q8TCJ2|STT3B_HUMAN Dolichyl-diphosphooligosaccharide--protein glycosyltransferase subunit STT3B OS=Homo sapiens OX=9606 GN=STT3B PE=1 SV=1	13685	20210911_zy_cell_ethcd_3.8291.8291.3	controllerType=0 controllerNumber=1 scan=8291	37.8564
06043:3	54	K.N[+2204.772]ITIVTGAPR.H	HexNAc(4)Hex(5)NeuAc(2)	N[+2205]	1082.8	3	3246.37	3246.38	0	-1.1	265	Specific	216.17	65.49	65.49	3.69	8	>sp|P26006|ITA3_HUMAN Integrin alpha-3 OS=Homo sapiens OX=9606 GN=ITGA3 PE=1 SV=5	6507	20210911_zy_cell_ethcd_3.6658.6658.3	controllerType=0 controllerNumber=1 scan=6658	30.5959
05049:3	126	R.SQN[+2026.687]DTVTPDVWYTSK.P	HexNAc(2)Hex(10)	N[+2027]	1256.5	3	3767.49	3767.49	0	-0.4	375	Specific	216.39	208.14	208.14	3.83	1	>sp|Q9BTY2|FUCO2_HUMAN Plasma alpha-L-fucosidase OS=Homo sapiens OX=9606 GN=FUCA2 PE=1 SV=2	6960	20210911_zy_cell_ethcd_3.5555.5555.3	controllerType=0 controllerNumber=1 scan=5555	25.6286
05180:3	34	K.QNNGAFN[+1702.581]ETLFR.N	HexNAc(2)Hex(8)	N[+1703]	1038.42	3	3113.25	3113.26	0	-0.8	721	Specific	216.77	125.68	125.68	4.02	4	>sp|P02786|TFR1_HUMAN Transferrin receptor protein 1 OS=Homo sapiens OX=9606 GN=TFRC PE=1 SV=2	16028	20210911_zy_cell_ethcd_3.5699.5699.3	controllerType=0 controllerNumber=1 scan=5699	26.2734
03849:2	5	R.GYN[+1702.581]VTYWR.E	HexNAc(2)Hex(8)	N[+1703]	1381.05	2	2761.09	2761.09	0	-0.2	847	Specific	216.97	124.06	124.06	3.93	23	>sp|P32004|L1CAM_HUMAN Neural cell adhesion molecule L1 OS=Homo sapiens OX=9606 GN=L1CAM PE=1 SV=2	3537	20210911_zy_cell_ethcd_3.4234.4234.2	controllerType=0 controllerNumber=1 scan=4234	19.5994
04368:3	115	K.VLGQSQEPNVNPASAGN[+2350.830]QTQK.T	HexNAc(4)Hex(5)Fuc(1)NeuAc(2)	N[+2351]	1506.64	3	4517.9	4517.9	0	-0.6	153	Specific	217.54	136.57	136.57	4.01	1	>sp|Q5VW38|GP107_HUMAN Protein GPR107 OS=Homo sapiens OX=9606 GN=GPR107 PE=1 SV=1	8685	20210911_zy_cell_ethcd_3.4806.4806.3	controllerType=0 controllerNumber=1 scan=4806	22.2311
04069:2	50	R.N[+1864.634]VSTNVFFK.Q	HexNAc(2)Hex(9)	N[+1865]	1460.6	2	2920.19	2920.19	0	-0.2	337	Specific	217.8	151.51	151.51	4.42	6	>sp|Q6YHK3|CD109_HUMAN CD109 antigen OS=Homo sapiens OX=9606 GN=CD109 PE=1 SV=2	8627	20210911_zy_cell_ethcd_3.4476.4476.2	controllerType=0 controllerNumber=1 scan=4476	20.7123
03224:3	10	R.IAPASN[+1216.423]VSHTVVLRPLK.A	HexNAc(2)Hex(5)	N[+1216]	1006.83	3	3018.48	3018.49	0	-0.9	83	Specific	218.26	185.8	185.8	5.28	7	>sp|P43308|SSRB_HUMAN Translocon-associated protein subunit beta OS=Homo sapiens OX=9606 GN=SSR2 PE=1 SV=1	13071	20210911_zy_cell_ethcd_3.3548.3548.3	controllerType=0 controllerNumber=1 scan=3548	16.4704
03977:3	25	R.N[+1540.529]HSIFLADINQER.G	HexNAc(2)Hex(7)	N[+1541]	1033.11	3	3097.31	3097.31	0	-1	197	Specific	218.63	115.49	115.49	4.68	4	>sp|P50897|PPT1_HUMAN Palmitoyl-protein thioesterase 1 OS=Homo sapiens OX=9606 GN=PPT1 PE=1 SV=1	7591	20210911_zy_cell_ethcd_3.4375.4375.3	controllerType=0 controllerNumber=1 scan=4375	20.2398
06411:3	84	R.HLYTTTGGETDFTN[+2026.687]VTSLR.G	HexNAc(2)Hex(10)	N[+2027]	1380.57	3	4139.7	4139.71	0	-1	393	Specific	219.06	155.73	155.73	5.47	1	>sp|Q99523|SORT_HUMAN Sortilin OS=Homo sapiens OX=9606 GN=SORT1 PE=1 SV=3	15998	20210911_zy_cell_ethcd_3.7072.7072.3	controllerType=0 controllerNumber=1 scan=7072	32.4621
02545:2	121	R.VIYN[+1702.581]LTEK.G	HexNAc(2)Hex(8)	N[+1703]	1341.57	2	2682.13	2682.13	0	-0.6	425	Specific	219.14	122.96	122.96	3.93	1	>sp|Q969V3|NCLN_HUMAN Nicalin OS=Homo sapiens OX=9606 GN=NCLN PE=1 SV=2	10863	20210911_zy_cell_ethcd_3.2803.2803.2	controllerType=0 controllerNumber=1 scan=2803	13.0742
03746:3	1	K.LRNPC[+57.021]TSEQN[+1872.651]C[+57.021]TSPFSYK.N	HexNAc(3)Hex(6)NeuAc(1)	C[+57]*2, N[+1873]	1354.55	3	4061.63	4061.63	0	1.2	203	Specific	220.06	125.41	125.41	4.03	30	>sp|P05556|ITB1_HUMAN Integrin beta-1 OS=Homo sapiens OX=9606 GN=ITGB1 PE=1 SV=2	3061	20210911_zy_cell_ethcd_3.4121.4121.3	controllerType=0 controllerNumber=1 scan=4121	19.0873
00801:3	48	K.YIHQN[+1864.634]YTK.A	HexNAc(2)Hex(9)	N[+1865]	977.726	3	2931.16	2931.17	0	-0.9	534	Specific	220.09	102.49	102.49	3.97	6	>sp|Q02809|PLOD1_HUMAN Procollagen-lysine,2-oxoglutarate 5-dioxygenase 1 OS=Homo sapiens OX=9606 GN=PLOD1 PE=1 SV=2	10199	20210911_zy_cell_ethcd_3.885.885.3	controllerType=0 controllerNumber=1 scan=885	4.2094
01364:3	4	K.NN[+1702.581]HTASILDR.M	HexNAc(2)Hex(8)	N[+1703]	948.39	3	2843.15	2843.16	0	-0.9	129	Specific	220.28	109.7	109.7	4.47	19	>sp|P08962|CD63_HUMAN CD63 antigen OS=Homo sapiens OX=9606 GN=CD63 PE=1 SV=2	5151	20210911_zy_cell_ethcd_3.1506.1506.3	controllerType=0 controllerNumber=1 scan=1506	7.1493
03373:2	78	K.SAEGTFFIN[+1702.581]K.T	HexNAc(2)Hex(8)	N[+1703]	1408.57	2	2816.14	2816.14	0	0.2	149	Specific	220.37	141.86	141.86	4.42	2	>sp|P06865|HEXA_HUMAN Beta-hexosaminidase subunit alpha OS=Homo sapiens OX=9606 GN=HEXA PE=1 SV=2	13346	20210911_zy_cell_ethcd_3.3712.3712.2	controllerType=0 controllerNumber=1 scan=3712	17.2112
01577:3	3	R.LN[+1913.677]SSTIK.Y	HexNAc(4)Hex(5)NeuAc(1)	N[+1914]	892.708	3	2676.11	2676.11	0	-1.4	274	Specific	220.53	11.04	11.04	1.71	21	>sp|P13473|LAMP2_HUMAN Lysosome-associated membrane glycoprotein 2 OS=Homo sapiens OX=9606 GN=LAMP2 PE=1 SV=2	6694	20210911_zy_cell_ethcd_3.1740.1740.3	controllerType=0 controllerNumber=1 scan=1740	8.2204
02901:3	16	R.KIPAIN[+1702.581]QTITEANEK.T	HexNAc(2)Hex(8)	N[+1703]	1124.83	3	3372.49	3372.49	0	-2	1390	Specific	222.36	136.85	136.85	4.36	11	>sp|P11047|LAMC1_HUMAN Laminin subunit gamma-1 OS=Homo sapiens OX=9606 GN=LAMC1 PE=1 SV=3	4746	20210911_zy_cell_ethcd_3.3193.3193.3	controllerType=0 controllerNumber=1 scan=3193	14.8455
02078:2	51	R.TVN[+1378.476]VSVPK.K	HexNAc(2)Hex(6)	N[+1378]	1111.49	2	2221.97	2221.97	0	-0.7	89	Specific	222.99	113.28	113.28	3.79	4	>sp|Q96KA5|CLP1L_HUMAN Cleft lip and palate transmembrane protein 1-like protein OS=Homo sapiens OX=9606 GN=CLPTM1L PE=1 SV=1	1199	20210911_zy_cell_ethcd_3.2290.2290.2	controllerType=0 controllerNumber=1 scan=2290	10.7241
01108:3	11	R.TLSRPSETC[+57.021]N[+1540.529]ETTK.L	HexNAc(2)Hex(7)	C[+57], N[+1541]	1055.43	3	3164.29	3164.29	0	-1.1	384	Specific	223	117.1	117.1	4.68	9	>sp|Q96AY3|FKB10_HUMAN Peptidyl-prolyl cis-trans isomerase FKBP10 OS=Homo sapiens OX=9606 GN=FKBP10 PE=1 SV=1	19614	20210911_zy_cell_ethcd_3.1224.1224.3	controllerType=0 controllerNumber=1 scan=1224	5.8204
02465:3	5	K.VPGN[+2350.830]QTSTTLK.L	HexNAc(4)Hex(5)Fuc(1)NeuAc(2)	N[+2351]	1166.15	3	3496.45	3496.45	0	-0.2	668	Specific	223.26	61.99	61.99	3.61	23	>sp|P32004|L1CAM_HUMAN Neural cell adhesion molecule L1 OS=Homo sapiens OX=9606 GN=L1CAM PE=1 SV=2	3537	20210911_zy_cell_ethcd_3.2715.2715.3	controllerType=0 controllerNumber=1 scan=2715	12.6689
03957:2	44	K.DSLSIN[+1702.581]ATNIK.H	HexNAc(2)Hex(8)	N[+1703]	1439.61	2	2878.21	2878.21	0	-0.5	347	Specific	223.32	146.4	146.4	4.42	6	>sp|P00533|EGFR_HUMAN Epidermal growth factor receptor OS=Homo sapiens OX=9606 GN=EGFR PE=1 SV=2	19596	20210911_zy_cell_ethcd_3.4353.4353.2	controllerType=0 controllerNumber=1 scan=4353	20.1406
01177:3	70	R.N[+1864.634]FTVAC[+57.021]QHR.S	HexNAc(2)Hex(9)	C[+57], N[+1865]	999.726	3	2997.16	2997.17	0	-1.2	785	Specific	224.45	79.49	79.49	4.14	4	>sp|P08581|MET_HUMAN Hepatocyte growth factor receptor OS=Homo sapiens OX=9606 GN=MET PE=1 SV=4	11721	20210911_zy_cell_ethcd_3.1300.1300.3	controllerType=0 controllerNumber=1 scan=1300	6.1782
02659:3	24	R.EAIN[+1864.634]ITLDHK.C	HexNAc(2)Hex(9)	N[+1865]	1006.75	3	3018.25	3018.26	0	-1.9	206	Specific	225.43	86.79	86.79	3.68	7	>sp|O00469|PLOD2_HUMAN Procollagen-lysine,2-oxoglutarate 5-dioxygenase 2 OS=Homo sapiens OX=9606 GN=PLOD2 PE=1 SV=2	15649	20210911_zy_cell_ethcd_3.2928.2928.3	controllerType=0 controllerNumber=1 scan=2928	13.6351
02795:3	111	R.EN[+1702.581]ATVPENEEEIIRK.M	HexNAc(2)Hex(8)	N[+1703]	1158.49	3	3473.47	3473.47	0	-0.4	26	Specific	225.53	137.79	137.79	4.05	1	>sp|Q8IWB1|IPRI_HUMAN Inositol 1,4,5-trisphosphate receptor-interacting protein OS=Homo sapiens OX=9606 GN=ITPRIP PE=1 SV=1	4000	20210911_zy_cell_ethcd_3.3077.3077.3	controllerType=0 controllerNumber=1 scan=3077	14.3148
02947:3	62	K.QRN[+1702.581]STIEAANLAGLK.I	HexNAc(2)Hex(8)	N[+1703]	1096.82	3	3288.44	3288.45	0	-1	182	Specific	225.96	128.61	128.61	4.29	2	>sp|P48723|HSP13_HUMAN Heat shock 70 kDa protein 13 OS=Homo sapiens OX=9606 GN=HSPA13 PE=1 SV=1	11660	20210911_zy_cell_ethcd_3.3244.3244.3	controllerType=0 controllerNumber=1 scan=3244	15.0781
04278:3	1	K.KDTC[+57.021]TQEC[+57.021]SYFN[+2059.735]ITK.V	HexNAc(4)Hex(5)Fuc(1)NeuAc(1)	C[+57]*2, N[+2060]	1318.86	3	3954.55	3954.57	0	-3.3	658	Specific	226.02	113.44	113.44	4.04	30	>sp|P05556|ITB1_HUMAN Integrin beta-1 OS=Homo sapiens OX=9606 GN=ITGB1 PE=1 SV=2	3061	20210911_zy_cell_ethcd_3.4707.4707.3	controllerType=0 controllerNumber=1 scan=4707	21.7881
02598:3	14	K.WGHN[+1540.529]ITEFQQR.F	HexNAc(2)Hex(7)	N[+1541]	986.074	3	2956.21	2956.21	0	-0.5	277	Specific	226.09	112.4	112.4	4.21	7	>sp|Q96HE7|ERO1A_HUMAN ERO1-like protein alpha OS=Homo sapiens OX=9606 GN=ERO1A PE=1 SV=2	2944	20210911_zy_cell_ethcd_3.2861.2861.3	controllerType=0 controllerNumber=1 scan=2861	13.3336
02437:2	3	R.VQPFN[+1581.555]VTQGK.Y	HexNAc(3)Hex(6)	N[+1582]	1350.08	2	2699.16	2699.16	0	0	352	Specific	228.1	126.47	126.47	4.42	21	>sp|P13473|LAMP2_HUMAN Lysosome-associated membrane glycoprotein 2 OS=Homo sapiens OX=9606 GN=LAMP2 PE=1 SV=2	6694	20210911_zy_cell_ethcd_3.2684.2684.2	controllerType=0 controllerNumber=1 scan=2684	12.527
05451:3	45	K.GELN[+1864.634]TSIFSSRPIDK.F	HexNAc(2)Hex(9)	N[+1865]	1176.84	3	3528.5	3528.5	0	-1.1	350	Specific	228.15	97.9	97.9	4.68	5	>sp|Q9UHG3|PCYOX_HUMAN Prenylcysteine oxidase 1 OS=Homo sapiens OX=9606 GN=PCYOX1 PE=1 SV=3	9384	20210911_zy_cell_ethcd_3.6000.6000.3	controllerType=0 controllerNumber=1 scan=6000	27.6366
05535:3	45	K.GELN[+1702.581]TSIFSSRPIDK.F	HexNAc(2)Hex(8)	N[+1703]	1122.82	3	3366.44	3366.45	0	-0.8	350	Specific	228.31	102.34	102.34	4.68	5	>sp|Q9UHG3|PCYOX_HUMAN Prenylcysteine oxidase 1 OS=Homo sapiens OX=9606 GN=PCYOX1 PE=1 SV=3	9384	20210911_zy_cell_ethcd_3.6095.6095.3	controllerType=0 controllerNumber=1 scan=6095	28.0632
01124:3	11	R.TLSRPSETC[+57.021]N[+1540.529]ETTK.L	HexNAc(2)Hex(7)	C[+57], N[+1541]	1055.43	3	3164.29	3164.29	0	-1.1	384	Specific	228.56	114.01	114.01	4.68	9	>sp|Q96AY3|FKB10_HUMAN Peptidyl-prolyl cis-trans isomerase FKBP10 OS=Homo sapiens OX=9606 GN=FKBP10 PE=1 SV=1	19614	20210911_zy_cell_ethcd_3.1242.1242.3	controllerType=0 controllerNumber=1 scan=1242	5.9045
02959:3	16	R.KIPAIN[+1540.529]QTITEANEK.T	HexNAc(2)Hex(7)	N[+1541]	1070.82	3	3210.44	3210.44	0	-1.5	1390	Specific	229.38	148.09	148.09	4.92	11	>sp|P11047|LAMC1_HUMAN Laminin subunit gamma-1 OS=Homo sapiens OX=9606 GN=LAMC1 PE=1 SV=3	4746	20210911_zy_cell_ethcd_3.3257.3257.3	controllerType=0 controllerNumber=1 scan=3257	15.1387
03288:3	41	K.GQTEIQVNC[+57.021]PPAVTEN[+1378.476]K.T	HexNAc(2)Hex(6)	C[+57], N[+1378]	1088.47	3	3263.39	3263.39	0	0	56	Specific	230.14	217.58	217.58	4.21	3	>sp|Q16563|SYPL1_HUMAN Synaptophysin-like protein 1 OS=Homo sapiens OX=9606 GN=SYPL1 PE=1 SV=1	16250	20210911_zy_cell_ethcd_3.3618.3618.3	controllerType=0 controllerNumber=1 scan=3618	16.7863
02922:3	1	K.LRNPC[+57.021]TSEQN[+1378.476]C[+57.021]TSPFSYK.N	HexNAc(2)Hex(6)	C[+57]*2, N[+1378]	1189.82	3	3567.45	3567.45	0	-1.5	203	Specific	230.49	158.19	158.19	4.8	30	>sp|P05556|ITB1_HUMAN Integrin beta-1 OS=Homo sapiens OX=9606 GN=ITGB1 PE=1 SV=2	3061	20210911_zy_cell_ethcd_3.3217.3217.3	controllerType=0 controllerNumber=1 scan=3217	14.9526
02749:3	3	K.VASVININPN[+2026.687]TTHSTGSC[+57.021]R.S	HexNAc(2)Hex(10)	C[+57], N[+2027]	1352.23	3	4054.68	4054.68	0	0.1	248	Specific	230.95	164.68	164.68	5.07	21	>sp|P13473|LAMP2_HUMAN Lysosome-associated membrane glycoprotein 2 OS=Homo sapiens OX=9606 GN=LAMP2 PE=1 SV=2	6694	20210911_zy_cell_ethcd_3.3026.3026.3	controllerType=0 controllerNumber=1 scan=3026	14.084
01747:3	11	R.YHYN[+1378.476]GTFEDGK.K	HexNAc(2)Hex(6)	N[+1378]	903.686	3	2709.04	2709.05	0	-1	67	Specific	232.98	148.93	148.93	4.71	9	>sp|Q96AY3|FKB10_HUMAN Peptidyl-prolyl cis-trans isomerase FKBP10 OS=Homo sapiens OX=9606 GN=FKBP10 PE=1 SV=1	19614	20210911_zy_cell_ethcd_3.1927.1927.3	controllerType=0 controllerNumber=1 scan=1927	9.0803
01835:3	4	K.NN[+2237.783]HTASILDR.M	HexNAc(4)Hex(7)NeuAc(1)	N[+2238]	1126.79	3	3378.36	3378.36	0	0.1	129	Specific	233.63	50.47	50.47	3.92	19	>sp|P08962|CD63_HUMAN CD63 antigen OS=Homo sapiens OX=9606 GN=CD63 PE=1 SV=2	5151	20210911_zy_cell_ethcd_3.2023.2023.3	controllerType=0 controllerNumber=1 scan=2023	9.5257
05514:3	45	K.GELN[+1540.529]TSIFSSRPIDK.F	HexNAc(2)Hex(7)	N[+1541]	1068.8	3	3204.39	3204.39	0	-1.8	350	Specific	234.33	100.73	100.73	4.18	5	>sp|Q9UHG3|PCYOX_HUMAN Prenylcysteine oxidase 1 OS=Homo sapiens OX=9606 GN=PCYOX1 PE=1 SV=3	9384	20210911_zy_cell_ethcd_3.6071.6071.3	controllerType=0 controllerNumber=1 scan=6071	27.96
02342:2	98	R.N[+1702.581]ISQVLEK.K	HexNAc(2)Hex(8)	N[+1703]	1317.06	2	2633.1	2633.11	0	-1.1	439	Specific	234.4	56	56	3.75	3	>sp|O14672|ADA10_HUMAN Disintegrin and metalloproteinase domain-containing protein 10 OS=Homo sapiens OX=9606 GN=ADAM10 PE=1 SV=1	717	20210911_zy_cell_ethcd_3.2580.2580.2	controllerType=0 controllerNumber=1 scan=2580	12.0481
02620:3	52	K.SFGGWN[+1702.581]TSGC[+57.021]VAHR.D	HexNAc(2)Hex(8)	C[+57], N[+1703]	1080.09	3	3238.26	3238.26	0	-1.5	813	Specific	234.42	78.05	78.05	4.32	9	>sp|Q86SQ4|AGRG6_HUMAN Adhesion G-protein coupled receptor G6 OS=Homo sapiens OX=9606 GN=ADGRG6 PE=1 SV=3	642	20210911_zy_cell_ethcd_3.2885.2885.3	controllerType=0 controllerNumber=1 scan=2885	13.4398
01213:2	40	K.GPTN[+1378.476]NTC[+57.021]VVR.T	HexNAc(2)Hex(6)	C[+57], N[+1378]	1248.51	2	2496.02	2496.02	0	-0.6	1438	Specific	234.56	106.66	106.66	4.21	4	>sp|Q8TEM1|PO210_HUMAN Nuclear pore membrane glycoprotein 210 OS=Homo sapiens OX=9606 GN=NUP210 PE=1 SV=3	3187	20210911_zy_cell_ethcd_3.1340.1340.2	controllerType=0 controllerNumber=1 scan=1340	6.3681
00960:3	116	R.QRYPAN[+1702.581]C[+57.021]TVR.D	HexNAc(2)Hex(8)	C[+57], N[+1703]	989.738	3	2967.2	2967.2	0	-0.7	152	Specific	234.66	134.14	134.14	3.74	2	>sp|Q9BRN9|TM2D3_HUMAN TM2 domain-containing protein 3 OS=Homo sapiens OX=9606 GN=TM2D3 PE=2 SV=2	3267	20210911_zy_cell_ethcd_3.1061.1061.3	controllerType=0 controllerNumber=1 scan=1061	5.0391
04085:3	63	K.GRDIYTFDGALN[+1581.555]K.S	HexNAc(3)Hex(6)	N[+1582]	1017.77	3	3051.29	3051.29	0	-1.8	62	Specific	235.55	193.08	193.08	3.82	2	>sp|Q08722|CD47_HUMAN Leukocyte surface antigen CD47 OS=Homo sapiens OX=9606 GN=CD47 PE=1 SV=1	886	20210911_zy_cell_ethcd_3.4494.4494.3	controllerType=0 controllerNumber=1 scan=4494	20.7959
01303:3	55	R.FNQC[+57.021]N[+2059.735]TTR.G	HexNAc(4)Hex(5)Fuc(1)NeuAc(1)	C[+57], N[+2060]	1034.07	3	3100.19	3100.19	0	-0.4	137	Specific	236.27	70.5	70.5	2.62	4	>sp|P09923|PPBI_HUMAN Intestinal-type alkaline phosphatase OS=Homo sapiens OX=9606 GN=ALPI PE=1 SV=2	15196	20210911_zy_cell_ethcd_3.1439.1439.3	controllerType=0 controllerNumber=1 scan=1439	6.8345
01965:3	73	K.YHVLHIN[+1710.598]TTK.N	HexNAc(3)Hex(5)NeuAc(1)	N[+1711]	979.425	3	2936.26	2936.27	0	-1.6	102	Specific	236.45	98.43	98.43	4.38	3	>sp|Q7LGA3|HS2ST_HUMAN Heparan sulfate 2-O-sulfotransferase 1 OS=Homo sapiens OX=9606 GN=HS2ST1 PE=1 SV=1	4219	20210911_zy_cell_ethcd_3.2166.2166.3	controllerType=0 controllerNumber=1 scan=2166	10.163
02949:3	16	R.KIPAIN[+1540.529]QTITEANEK.T	HexNAc(2)Hex(7)	N[+1541]	1070.82	3	3210.44	3210.44	0	0.3	1390	Specific	236.61	160.88	160.88	4.62	11	>sp|P11047|LAMC1_HUMAN Laminin subunit gamma-1 OS=Homo sapiens OX=9606 GN=LAMC1 PE=1 SV=3	4746	20210911_zy_cell_ethcd_3.3246.3246.3	controllerType=0 controllerNumber=1 scan=3246	15.0881
01839:2	7	R.AEPPLN[+1378.476]ASASDQGEK.V	HexNAc(2)Hex(6)	N[+1378]	1446.6	2	2892.19	2892.19	0	-0.5	926	Specific	237.18	174.39	174.39	4.54	16	>sp|Q9Y4L1|HYOU1_HUMAN Hypoxia up-regulated protein 1 OS=Homo sapiens OX=9606 GN=HYOU1 PE=1 SV=1	14756	20210911_zy_cell_ethcd_3.2028.2028.2	controllerType=0 controllerNumber=1 scan=2028	9.5457
02744:3	3	K.VASVININPN[+2133.772]TTHSTGSC[+57.021]R.S	HexNAc(5)Hex(6)Fuc(1)	C[+57], N[+2134]	1387.93	3	4161.76	4161.76	0	-0.7	248	Specific	237.44	117.8	117.8	4.91	21	>sp|P13473|LAMP2_HUMAN Lysosome-associated membrane glycoprotein 2 OS=Homo sapiens OX=9606 GN=LAMP2 PE=1 SV=2	6694	20210911_zy_cell_ethcd_3.3021.3021.3	controllerType=0 controllerNumber=1 scan=3021	14.0596
05270:3	1	K.DTC[+57.021]TQEC[+57.021]SYFN[+1864.634]ITK.V	HexNAc(2)Hex(9)	C[+57]*2, N[+1865]	1211.13	3	3631.37	3631.37	0	0.2	659	Specific	237.82	177.32	177.32	3.9	30	>sp|P05556|ITB1_HUMAN Integrin beta-1 OS=Homo sapiens OX=9606 GN=ITGB1 PE=1 SV=2	3061	20210911_zy_cell_ethcd_3.5798.5798.3	controllerType=0 controllerNumber=1 scan=5798	26.7263
01429:2	13	K.PLFN[+1702.581]K.S	HexNAc(2)Hex(8)	N[+1703]	1160.97	2	2320.94	2320.94	0	-1.4	54	Specific	238.24	11.08	11.08	2.78	10	>sp|P20645|MPRD_HUMAN Cation-dependent mannose-6-phosphate receptor OS=Homo sapiens OX=9606 GN=M6PR PE=1 SV=1	11960	20210911_zy_cell_ethcd_3.1577.1577.2	controllerType=0 controllerNumber=1 scan=1577	7.4834
02429:2	3	R.VQPFN[+1378.476]VTQGK.Y	HexNAc(2)Hex(6)	N[+1378]	1248.54	2	2496.08	2496.08	0	0	352	Specific	240.27	128.49	128.49	5.6	21	>sp|P13473|LAMP2_HUMAN Lysosome-associated membrane glycoprotein 2 OS=Homo sapiens OX=9606 GN=LAMP2 PE=1 SV=2	6694	20210911_zy_cell_ethcd_3.2675.2675.2	controllerType=0 controllerNumber=1 scan=2675	12.4842
03220:3	10	R.IAPASN[+1540.529]VSHTVVLRPLK.A	HexNAc(2)Hex(7)	N[+1541]	1114.87	3	3342.59	3342.59	0	-0.2	83	Specific	240.45	240.45	240.45	5.94	7	>sp|P43308|SSRB_HUMAN Translocon-associated protein subunit beta OS=Homo sapiens OX=9606 GN=SSR2 PE=1 SV=1	13071	20210911_zy_cell_ethcd_3.3544.3544.3	controllerType=0 controllerNumber=1 scan=3544	16.4526
04440:2	62	R.N[+1702.581]STIEAANLAGLK.I	HexNAc(2)Hex(8)	N[+1703]	1502.65	2	3004.28	3004.29	0	-0.7	184	Specific	241.17	193.87	193.87	5.73	2	>sp|P48723|HSP13_HUMAN Heat shock 70 kDa protein 13 OS=Homo sapiens OX=9606 GN=HSPA13 PE=1 SV=1	11660	20210911_zy_cell_ethcd_3.4886.4886.2	controllerType=0 controllerNumber=1 scan=4886	22.5931
01095:3	1	K.C[+57.021]HEGN[+1864.634]GTFEC[+57.021]GAC[+57.021]R.C	HexNAc(2)Hex(9)	C[+57]*3, N[+1865]	1173.75	3	3519.24	3519.25	0	-1.6	477	Specific	241.19	241.19	241.19	5.92	30	>sp|P05556|ITB1_HUMAN Integrin beta-1 OS=Homo sapiens OX=9606 GN=ITGB1 PE=1 SV=2	3061	20210911_zy_cell_ethcd_3.1210.1210.3	controllerType=0 controllerNumber=1 scan=1210	5.7512
01309:3	11	R.YHYN[+1540.529]GTFEDGKK.F	HexNAc(2)Hex(7)	N[+1541]	1000.4	3	2999.19	2999.19	0	-0.9	67	Specific	241.97	129.37	129.37	5.13	9	>sp|Q96AY3|FKB10_HUMAN Peptidyl-prolyl cis-trans isomerase FKBP10 OS=Homo sapiens OX=9606 GN=FKBP10 PE=1 SV=1	19614	20210911_zy_cell_ethcd_3.1445.1445.3	controllerType=0 controllerNumber=1 scan=1445	6.8624
01767:3	8	K.PIN[+1702.581]TTGTLKPDDR.V	HexNAc(2)Hex(8)	N[+1703]	1044.11	3	3130.33	3130.33	0	-0.5	262	Specific	243.41	114.21	114.21	5.57	10	>sp|Q92542|NICA_HUMAN Nicastrin OS=Homo sapiens OX=9606 GN=NCSTN PE=1 SV=2	7240	20210911_zy_cell_ethcd_3.1949.1949.3	controllerType=0 controllerNumber=1 scan=1949	9.18
02717:2	24	K.YFN[+1702.581]YTVK.V	HexNAc(2)Hex(8)	N[+1703]	1319.03	2	2637.05	2637.05	0	0	61	Specific	244.32	116.38	116.38	4.72	7	>sp|O00469|PLOD2_HUMAN Procollagen-lysine,2-oxoglutarate 5-dioxygenase 2 OS=Homo sapiens OX=9606 GN=PLOD2 PE=1 SV=2	15649	20210911_zy_cell_ethcd_3.2991.2991.2	controllerType=0 controllerNumber=1 scan=2991	13.9246
03223:3	10	R.IAPASN[+1702.581]VSHTVVLRPLK.A	HexNAc(2)Hex(8)	N[+1703]	1168.88	3	3504.64	3504.65	0	-1.6	83	Specific	245.85	245.85	245.85	6.37	7	>sp|P43308|SSRB_HUMAN Translocon-associated protein subunit beta OS=Homo sapiens OX=9606 GN=SSR2 PE=1 SV=1	13071	20210911_zy_cell_ethcd_3.3547.3547.3	controllerType=0 controllerNumber=1 scan=3547	16.4658
02850:3	3	K.VASVININPN[+1216.423]TTHSTGSC[+57.021]R.S	HexNAc(2)Hex(5)	C[+57], N[+1216]	1082.14	3	3244.41	3244.42	0	-1.7	248	Specific	246.24	181.19	181.19	6.61	21	>sp|P13473|LAMP2_HUMAN Lysosome-associated membrane glycoprotein 2 OS=Homo sapiens OX=9606 GN=LAMP2 PE=1 SV=2	6694	20210911_zy_cell_ethcd_3.3137.3137.3	controllerType=0 controllerNumber=1 scan=3137	14.5916
03245:2	2	R.GHTLTLN[+1378.476]FTR.N	HexNAc(2)Hex(6)	N[+1378]	1269.55	2	2538.1	2538.1	0	-0.8	97	Specific	246.24	92.41	92.41	5.24	45	>sp|P11279|LAMP1_HUMAN Lysosome-associated membrane glycoprotein 1 OS=Homo sapiens OX=9606 GN=LAMP1 PE=1 SV=3	4405	20210911_zy_cell_ethcd_3.3571.3571.3	controllerType=0 controllerNumber=1 scan=3571	16.5745
04365:3	76	K.QLVHSFAEGQDQGSAYAN[+2350.830]R.T	HexNAc(4)Hex(5)Fuc(1)NeuAc(2)	N[+2351]	1476.94	3	4428.8	4428.8	0	0.1	74	Specific	246.89	179.98	179.98	6.3	1	>sp|Q5ZPR3|CD276_HUMAN CD276 antigen OS=Homo sapiens OX=9606 GN=CD276 PE=1 SV=1	1114	20210911_zy_cell_ethcd_3.4803.4803.3	controllerType=0 controllerNumber=1 scan=4803	22.2172
02389:3	2	R.LLNINPN[+1987.714]K.T	HexNAc(5)Hex(6)	N[+1988]	971.757	3	2913.26	2913.26	0	-1.1	255	Specific	248.2	130.53	130.53	4.49	45	>sp|P11279|LAMP1_HUMAN Lysosome-associated membrane glycoprotein 1 OS=Homo sapiens OX=9606 GN=LAMP1 PE=1 SV=3	4405	20210911_zy_cell_ethcd_3.2631.2631.3	controllerType=0 controllerNumber=1 scan=2631	12.2858
02393:2	3	R.VQPFN[+1702.581]VTQGK.Y	HexNAc(2)Hex(8)	N[+1703]	1410.59	2	2820.18	2820.18	0	-1	352	Specific	248.93	101.21	101.21	5.66	21	>sp|P13473|LAMP2_HUMAN Lysosome-associated membrane glycoprotein 2 OS=Homo sapiens OX=9606 GN=LAMP2 PE=1 SV=2	6694	20210911_zy_cell_ethcd_3.2636.2636.2	controllerType=0 controllerNumber=1 scan=2636	12.3061
01873:3	8	R.RPN[+1702.581]QSQPLPPSSLQR.F	HexNAc(2)Hex(8)	N[+1703]	1136.5	3	3407.49	3407.5	0	-0.8	415	Specific	249.58	168.75	168.75	5.48	10	>sp|Q92542|NICA_HUMAN Nicastrin OS=Homo sapiens OX=9606 GN=NCSTN PE=1 SV=2	7240	20210911_zy_cell_ethcd_3.2065.2065.3	controllerType=0 controllerNumber=1 scan=2065	9.7125
04050:3	31	K.C[+57.021]NM[+15.995]IN[+1702.581]GTDGDSFHPLITK.D	HexNAc(2)Hex(8)	C[+57], M[+16], N[+1703]	1246.84	3	3738.5	3738.5	0	-0.4	245	Specific	249.62	211.97	211.97	6.17	4	>sp|Q14108|SCRB2_HUMAN Lysosome membrane protein 2 OS=Homo sapiens OX=9606 GN=SCARB2 PE=1 SV=2	18342	20210911_zy_cell_ethcd_3.4455.4455.3	controllerType=0 controllerNumber=1 scan=4455	20.6107
07543:3	55	K.HQGAWYVWN[+2204.772]R.T	HexNAc(4)Hex(5)NeuAc(2)	N[+2205]	1174.47	3	3521.4	3521.4	0	-0.9	260	Specific	251.24	122.28	122.28	5.92	4	>sp|P09923|PPBI_HUMAN Intestinal-type alkaline phosphatase OS=Homo sapiens OX=9606 GN=ALPI PE=1 SV=2	15196	20210911_zy_cell_ethcd_3.8372.8372.3	controllerType=0 controllerNumber=1 scan=8372	38.2179
02435:2	2	R.LLNINPN[+1581.555]K.T	HexNAc(3)Hex(6)	N[+1582]	1254.05	2	2507.1	2507.1	0	-0.3	255	Specific	251.68	128.5	128.5	4.96	45	>sp|P11279|LAMP1_HUMAN Lysosome-associated membrane glycoprotein 1 OS=Homo sapiens OX=9606 GN=LAMP1 PE=1 SV=3	4405	20210911_zy_cell_ethcd_3.2682.2682.2	controllerType=0 controllerNumber=1 scan=2682	12.5155
02852:3	3	K.VASVININPN[+1768.640]TTHSTGSC[+57.021]R.S	HexNAc(4)Hex(5)Fuc(1)	C[+57], N[+1769]	1266.21	3	3796.63	3796.63	0	-0.8	248	Specific	252	153.48	153.48	6.05	21	>sp|P13473|LAMP2_HUMAN Lysosome-associated membrane glycoprotein 2 OS=Homo sapiens OX=9606 GN=LAMP2 PE=1 SV=2	6694	20210911_zy_cell_ethcd_3.3140.3140.3	controllerType=0 controllerNumber=1 scan=3140	14.6029
04495:3	20	R.VTPAC[+57.021]N[+3007.058]TSLPAQR.W	HexNAc(5)Hex(6)Fuc(1)NeuAc(3)	C[+57], N[+3007]	1474.6	3	4421.77	4421.77	0	1.2	64	Specific	252.61	72.34	72.34	3.95	12	>sp|Q9UBG0|MRC2_HUMAN C-type mannose receptor 2 OS=Homo sapiens OX=9606 GN=MRC2 PE=1 SV=2	16756	20210911_zy_cell_ethcd_3.4946.4946.3	controllerType=0 controllerNumber=1 scan=4946	22.8568
02854:3	19	K.GLN[+2026.687]LTEDTYKPR.I	HexNAc(2)Hex(10)	N[+2027]	1145.14	3	3433.41	3433.41	0	-0.8	396	Specific	252.94	132.22	132.22	5.6	8	>sp|Q08380|LG3BP_HUMAN Galectin-3-binding protein OS=Homo sapiens OX=9606 GN=LGALS3BP PE=1 SV=1	4876	20210911_zy_cell_ethcd_3.3142.3142.3	controllerType=0 controllerNumber=1 scan=3142	14.6119
03416:3	5	R.THN[+1913.677]LTDLSPHLR.Y	HexNAc(4)Hex(5)NeuAc(1)	N[+1914]	1106.47	3	3317.41	3317.42	0	-2.6	977	Specific	253.4	67.74	67.74	4.58	23	>sp|P32004|L1CAM_HUMAN Neural cell adhesion molecule L1 OS=Homo sapiens OX=9606 GN=L1CAM PE=1 SV=2	3537	20210911_zy_cell_ethcd_3.3759.3759.3	controllerType=0 controllerNumber=1 scan=3759	17.4316
02569:3	5	R.THN[+2026.687]LTDLSPHLR.Y	HexNAc(2)Hex(10)	N[+2027]	1144.15	3	3430.42	3430.43	0	-0.9	977	Specific	253.66	135.09	135.09	5.81	23	>sp|P32004|L1CAM_HUMAN Neural cell adhesion molecule L1 OS=Homo sapiens OX=9606 GN=L1CAM PE=1 SV=2	3537	20210911_zy_cell_ethcd_3.2829.2829.3	controllerType=0 controllerNumber=1 scan=2829	13.1921
02526:2	85	R.N[+1702.581]TTIFLK.F	HexNAc(2)Hex(8)	N[+1703]	1270.04	2	2539.07	2539.07	0	-0.7	62	Specific	254.73	151.74	151.74	4.96	2	>sp|Q8NBN3|TM87A_HUMAN Transmembrane protein 87A OS=Homo sapiens OX=9606 GN=TMEM87A PE=1 SV=3	19278	20210911_zy_cell_ethcd_3.2782.2782.2	controllerType=0 controllerNumber=1 scan=2782	12.9769
03760:3	1	K.LRNPC[+57.021]TSEQN[+1872.651]C[+57.021]TSPFSYK.N	HexNAc(3)Hex(6)NeuAc(1)	C[+57]*2, N[+1873]	1354.55	3	4061.62	4061.63	0	-0.6	203	Specific	255.86	138.89	138.89	5.7	30	>sp|P05556|ITB1_HUMAN Integrin beta-1 OS=Homo sapiens OX=9606 GN=ITGB1 PE=1 SV=2	3061	20210911_zy_cell_ethcd_3.4137.4137.3	controllerType=0 controllerNumber=1 scan=4137	19.1564
02357:2	2	R.LLNINPN[+1864.634]K.T	HexNAc(2)Hex(9)	N[+1865]	1395.59	2	2790.18	2790.18	0	-0.4	255	Specific	256.37	147.82	147.82	4.96	45	>sp|P11279|LAMP1_HUMAN Lysosome-associated membrane glycoprotein 1 OS=Homo sapiens OX=9606 GN=LAMP1 PE=1 SV=3	4405	20210911_zy_cell_ethcd_3.2596.2596.2	controllerType=0 controllerNumber=1 scan=2596	12.1203
02963:3	16	R.KIPAIN[+1702.581]QTITEANEK.T	HexNAc(2)Hex(8)	N[+1703]	1124.84	3	3372.49	3372.49	0	-0.2	1390	Specific	256.54	167.12	167.12	5.73	11	>sp|P11047|LAMC1_HUMAN Laminin subunit gamma-1 OS=Homo sapiens OX=9606 GN=LAMC1 PE=1 SV=3	4746	20210911_zy_cell_ethcd_3.3262.3262.3	controllerType=0 controllerNumber=1 scan=3262	15.1593
01820:3	7	R.AEPPLN[+1702.581]ASASDQGEK.V	HexNAc(2)Hex(8)	N[+1703]	1072.77	3	3216.29	3216.29	0	-0.8	926	Specific	257.24	163.34	163.34	5.23	16	>sp|Q9Y4L1|HYOU1_HUMAN Hypoxia up-regulated protein 1 OS=Homo sapiens OX=9606 GN=HYOU1 PE=1 SV=1	14756	20210911_zy_cell_ethcd_3.2007.2007.3	controllerType=0 controllerNumber=1 scan=2007	9.4493
01144:2	40	K.GPTN[+1702.581]NTC[+57.021]VVR.T	HexNAc(2)Hex(8)	C[+57], N[+1703]	1410.56	2	2820.12	2820.12	0	-0.8	1438	Specific	258.44	143.35	143.35	5.92	4	>sp|Q8TEM1|PO210_HUMAN Nuclear pore membrane glycoprotein 210 OS=Homo sapiens OX=9606 GN=NUP210 PE=1 SV=3	3187	20210911_zy_cell_ethcd_3.1264.1264.2	controllerType=0 controllerNumber=1 scan=1264	6.0081
01174:3	2	R.KDN[+2350.830]TTVTR.L	HexNAc(4)Hex(5)Fuc(1)NeuAc(2)	N[+2351]	1095.78	3	3285.32	3285.33	0	-0.9	247	Specific	258.52	64.68	64.68	4.64	45	>sp|P11279|LAMP1_HUMAN Lysosome-associated membrane glycoprotein 1 OS=Homo sapiens OX=9606 GN=LAMP1 PE=1 SV=3	4405	20210911_zy_cell_ethcd_3.1297.1297.3	controllerType=0 controllerNumber=1 scan=1297	6.1622
06117:3	54	R.ELAVPDGYTN[+2350.830]R.T	HexNAc(4)Hex(5)Fuc(1)NeuAc(2)	N[+2351]	1195.82	3	3585.43	3585.44	0	-0.5	77	Specific	259.01	140.88	140.88	4.79	8	>sp|P26006|ITA3_HUMAN Integrin alpha-3 OS=Homo sapiens OX=9606 GN=ITGA3 PE=1 SV=5	6507	20210911_zy_cell_ethcd_3.6740.6740.3	controllerType=0 controllerNumber=1 scan=6740	30.9757
04514:3	20	R.VTPAC[+57.021]N[+3007.058]TSLPAQR.W	HexNAc(5)Hex(6)Fuc(1)NeuAc(3)	C[+57], N[+3007]	1474.59	3	4421.77	4421.77	0	0.3	64	Specific	259.64	92.19	92.19	4.76	12	>sp|Q9UBG0|MRC2_HUMAN C-type mannose receptor 2 OS=Homo sapiens OX=9606 GN=MRC2 PE=1 SV=2	16756	20210911_zy_cell_ethcd_3.4967.4967.3	controllerType=0 controllerNumber=1 scan=4967	22.9512
02485:2	2	R.LLNINPN[+1768.640]K.T	HexNAc(4)Hex(5)Fuc(1)	N[+1769]	1347.6	2	2694.19	2694.19	0	-0.1	255	Specific	260.67	112.38	112.38	4.72	45	>sp|P11279|LAMP1_HUMAN Lysosome-associated membrane glycoprotein 1 OS=Homo sapiens OX=9606 GN=LAMP1 PE=1 SV=3	4405	20210911_zy_cell_ethcd_3.2737.2737.2	controllerType=0 controllerNumber=1 scan=2737	12.7692
00867:2	7	K.N[+1378.476]ATLAEQAK.L	HexNAc(2)Hex(6)	N[+1378]	1162.49	2	2323.97	2323.98	0	-1.9	869	Specific	261.06	184.16	184.16	5.83	16	>sp|Q9Y4L1|HYOU1_HUMAN Hypoxia up-regulated protein 1 OS=Homo sapiens OX=9606 GN=HYOU1 PE=1 SV=1	14756	20210911_zy_cell_ethcd_3.958.958.2	controllerType=0 controllerNumber=1 scan=958	4.5515
03226:3	2	R.GHTLTLN[+1378.476]FTR.N	HexNAc(2)Hex(6)	N[+1378]	846.706	3	2538.1	2538.1	0	2.1	97	Specific	261.96	150.2	150.2	4.41	45	>sp|P11279|LAMP1_HUMAN Lysosome-associated membrane glycoprotein 1 OS=Homo sapiens OX=9606 GN=LAMP1 PE=1 SV=3	4405	20210911_zy_cell_ethcd_3.3550.3550.3	controllerType=0 controllerNumber=1 scan=3550	16.4794
01798:2	6	R.N[+1540.529]TTFNVESTK.K	HexNAc(2)Hex(7)	N[+1541]	1341.04	2	2681.08	2681.08	0	-0.3	418	Specific	262.44	178.03	178.03	5.51	14	>sp|P56199|ITA1_HUMAN Integrin alpha-1 OS=Homo sapiens OX=9606 GN=ITGA1 PE=1 SV=2	9701	20210911_zy_cell_ethcd_3.1983.1983.2	controllerType=0 controllerNumber=1 scan=1983	9.3403
01333:2	18	K.AMSSN[+1864.634]ETAAYK.I	HexNAc(2)Hex(9)	N[+1865]	1519.08	2	3037.16	3037.16	0	-0.9	637	Specific	264.01	182.03	182.03	5.83	7	>sp|Q8TCJ2|STT3B_HUMAN Dolichyl-diphosphooligosaccharide--protein glycosyltransferase subunit STT3B OS=Homo sapiens OX=9606 GN=STT3B PE=1 SV=1	13685	20210911_zy_cell_ethcd_3.1472.1472.2	controllerType=0 controllerNumber=1 scan=1472	6.9875
02933:3	82	R.VTGLN[+2350.830]C[+57.021]TTNHPINPK.G	HexNAc(4)Hex(5)Fuc(1)NeuAc(2)	C[+57], N[+2351]	1339.56	3	4016.67	4016.67	0	-0.7	864	Specific	264.34	85.12	85.12	5.57	1	>sp|P08648|ITA5_HUMAN Integrin alpha-5 OS=Homo sapiens OX=9606 GN=ITGA5 PE=1 SV=2	11180	20210911_zy_cell_ethcd_3.3229.3229.3	controllerType=0 controllerNumber=1 scan=3229	15.0068
03852:3	61	R.GN[+2350.830]ITEYQC[+57.021]HQYITK.M	HexNAc(4)Hex(5)Fuc(1)NeuAc(2)	C[+57], N[+2351]	1369.22	3	4105.65	4105.65	0	0.4	209	Specific	264.83	134.69	134.69	5.23	3	>sp|Q92896|GSLG1_HUMAN Golgi apparatus protein 1 OS=Homo sapiens OX=9606 GN=GLG1 PE=1 SV=2	13270	20210911_zy_cell_ethcd_3.4238.4238.3	controllerType=0 controllerNumber=1 scan=4238	19.6164
04096:2	50	R.N[+1702.581]VSTNVFFK.Q	HexNAc(2)Hex(8)	N[+1703]	1379.57	2	2758.13	2758.13	0	-0.3	337	Specific	267.42	199.23	199.23	5.51	6	>sp|Q6YHK3|CD109_HUMAN CD109 antigen OS=Homo sapiens OX=9606 GN=CD109 PE=1 SV=2	8627	20210911_zy_cell_ethcd_3.4506.4506.2	controllerType=0 controllerNumber=1 scan=4506	20.852
02404:2	3	R.VQPFN[+1540.529]VTQGK.Y	HexNAc(2)Hex(7)	N[+1541]	1329.57	2	2658.13	2658.13	0	-0.9	352	Specific	267.59	158.42	158.42	5.92	21	>sp|P13473|LAMP2_HUMAN Lysosome-associated membrane glycoprotein 2 OS=Homo sapiens OX=9606 GN=LAMP2 PE=1 SV=2	6694	20210911_zy_cell_ethcd_3.2648.2648.2	controllerType=0 controllerNumber=1 scan=2648	12.3594
02892:3	1	R.NPC[+57.021]TSEQN[+1378.476]C[+57.021]TSPFSYK.N	HexNAc(2)Hex(6)	C[+57]*2, N[+1378]	1100.09	3	3298.26	3298.27	0	-1.3	205	Specific	268.59	268.59	268.59	5.21	30	>sp|P05556|ITB1_HUMAN Integrin beta-1 OS=Homo sapiens OX=9606 GN=ITGB1 PE=1 SV=2	3061	20210911_zy_cell_ethcd_3.3184.3184.3	controllerType=0 controllerNumber=1 scan=3184	14.8016
02242:2	49	K.ALSPN[+1702.581]STISSAPK.D	HexNAc(2)Hex(8)	N[+1703]	1488.13	2	2975.26	2975.26	0	-0.1	632	Specific	269.31	119.77	119.77	5.57	3	>sp|Q9UH99|SUN2_HUMAN SUN domain-containing protein 2 OS=Homo sapiens OX=9606 GN=SUN2 PE=1 SV=3	18015	20210911_zy_cell_ethcd_3.2470.2470.2	controllerType=0 controllerNumber=1 scan=2470	11.5412
02089:2	69	R.N[+1702.581]WTITR.L	HexNAc(2)Hex(8)	N[+1703]	1247	2	2493	2493	0	-0.2	651	Specific	270.25	83.52	83.52	4.72	5	>sp|P19022|CADH2_HUMAN Cadherin-2 OS=Homo sapiens OX=9606 GN=CDH2 PE=1 SV=4	1389	20210911_zy_cell_ethcd_3.2302.2302.2	controllerType=0 controllerNumber=1 scan=2302	10.7813
01158:3	2	R.KDN[+2350.830]TTVTR.L	HexNAc(4)Hex(5)Fuc(1)NeuAc(2)	N[+2351]	1095.78	3	3285.32	3285.33	0	-2.1	247	Specific	270.79	76.67	76.67	4.12	45	>sp|P11279|LAMP1_HUMAN Lysosome-associated membrane glycoprotein 1 OS=Homo sapiens OX=9606 GN=LAMP1 PE=1 SV=3	4405	20210911_zy_cell_ethcd_3.1279.1279.3	controllerType=0 controllerNumber=1 scan=1279	6.0791
03271:3	10	R.IAPASN[+1864.634]VSHTVVLRPLK.A	HexNAc(2)Hex(9)	N[+1865]	1222.9	3	3666.7	3666.7	0	-0.2	83	Specific	271.81	251.69	251.69	6.06	7	>sp|P43308|SSRB_HUMAN Translocon-associated protein subunit beta OS=Homo sapiens OX=9606 GN=SSR2 PE=1 SV=1	13071	20210911_zy_cell_ethcd_3.3600.3600.3	controllerType=0 controllerNumber=1 scan=3600	16.7041
03239:2	2	R.GHTLTLN[+1378.476]FTR.N	HexNAc(2)Hex(6)	N[+1378]	1269.55	2	2538.1	2538.1	0	0.4	97	Specific	272.5	136.27	136.27	4.92	45	>sp|P11279|LAMP1_HUMAN Lysosome-associated membrane glycoprotein 1 OS=Homo sapiens OX=9606 GN=LAMP1 PE=1 SV=3	4405	20210911_zy_cell_ethcd_3.3564.3564.3	controllerType=0 controllerNumber=1 scan=3564	16.5426
02632:3	47	R.FINYN[+1702.581]QTVSR.M	HexNAc(2)Hex(8)	N[+1703]	982.074	3	2944.21	2944.21	0	-0.2	909	Specific	272.62	124.47	124.47	4.79	4	>sp|Q8N766|EMC1_HUMAN ER membrane protein complex subunit 1 OS=Homo sapiens OX=9606 GN=EMC1 PE=1 SV=1	4991	20210911_zy_cell_ethcd_3.2898.2898.3	controllerType=0 controllerNumber=1 scan=2898	13.4986
04151:4	15	R.FTFTSHTPGEHQIC[+57.021]LHSN[+2350.830]STK.F	HexNAc(4)Hex(5)Fuc(1)NeuAc(2)	C[+57], N[+2351]	1195.75	4	4779.96	4779.96	0	0.1	108	Specific	273.09	221.17	221.17	5.59	3	>sp|Q9BVK6|TMED9_HUMAN Transmembrane emp24 domain-containing protein 9 OS=Homo sapiens OX=9606 GN=TMED9 PE=1 SV=2	14554	20210911_zy_cell_ethcd_3.4567.4567.4	controllerType=0 controllerNumber=1 scan=4567	21.1428
02669:3	24	R.EAIN[+1702.581]ITLDHK.C	HexNAc(2)Hex(8)	N[+1703]	952.738	3	2856.2	2856.2	0	-1.4	206	Specific	273.15	155.06	155.06	5.92	7	>sp|O00469|PLOD2_HUMAN Procollagen-lysine,2-oxoglutarate 5-dioxygenase 2 OS=Homo sapiens OX=9606 GN=PLOD2 PE=1 SV=2	15649	20210911_zy_cell_ethcd_3.2939.2939.3	controllerType=0 controllerNumber=1 scan=2939	13.685
03162:2	7	R.VFGSQN[+1864.634]LTTVK.L	HexNAc(2)Hex(9)	N[+1865]	1529.65	2	3058.29	3058.29	0	-0.3	510	Specific	273.42	124.7	124.7	5.6	16	>sp|Q9Y4L1|HYOU1_HUMAN Hypoxia up-regulated protein 1 OS=Homo sapiens OX=9606 GN=HYOU1 PE=1 SV=1	14756	20210911_zy_cell_ethcd_3.3480.3480.2	controllerType=0 controllerNumber=1 scan=3480	16.1585
04744:3	23	R.TILVDNNTWN[+1540.529]NTHISR.V	HexNAc(2)Hex(7)	N[+1541]	1146.83	3	3438.47	3438.48	0	-1.7	539	Specific	273.48	168.44	92.21	6.05	3	>sp|P46977|STT3A_HUMAN Dolichyl-diphosphooligosaccharide--protein glycosyltransferase subunit STT3A OS=Homo sapiens OX=9606 GN=STT3A PE=1 SV=2	18762	20210911_zy_cell_ethcd_3.5219.5219.3	controllerType=0 controllerNumber=1 scan=5219	24.1008
02080:2	69	R.N[+1864.634]WTITR.L	HexNAc(2)Hex(9)	N[+1865]	1328.03	2	2655.05	2655.05	0	-0.4	651	Specific	273.63	90.45	90.45	4.72	5	>sp|P19022|CADH2_HUMAN Cadherin-2 OS=Homo sapiens OX=9606 GN=CDH2 PE=1 SV=4	1389	20210911_zy_cell_ethcd_3.2292.2292.2	controllerType=0 controllerNumber=1 scan=2292	10.7341
01980:3	28	K.HTNMN[+1540.529]LTQLK.V	HexNAc(2)Hex(7)	N[+1541]	914.054	3	2740.15	2740.15	0	-0.3	250	Specific	273.71	136.69	136.69	5.6	6	>sp|Q15165|PON2_HUMAN Serum paraoxonase/arylesterase 2 OS=Homo sapiens OX=9606 GN=PON2 PE=1 SV=4	9244	20210911_zy_cell_ethcd_3.2182.2182.3	controllerType=0 controllerNumber=1 scan=2182	10.2344
03059:3	21	R.LEN[+1864.634]ITTGTYTIHAQK.E	HexNAc(2)Hex(9)	N[+1865]	1185.51	3	3554.51	3554.51	0	-0.5	367	Specific	274.08	151.08	151.08	5.82	5	>sp|Q5JPE7|NOMO2_HUMAN Nodal modulator 2 OS=Homo sapiens OX=9606 GN=NOMO2 PE=1 SV=1	6463	20210911_zy_cell_ethcd_3.3367.3367.3	controllerType=0 controllerNumber=1 scan=3367	15.6299
03180:3	2	R.GHTLTLN[+1702.581]FTR.N	HexNAc(2)Hex(8)	N[+1703]	954.738	3	2862.2	2862.2	0	-1.3	97	Specific	274.15	167.3	167.3	5.83	45	>sp|P11279|LAMP1_HUMAN Lysosome-associated membrane glycoprotein 1 OS=Homo sapiens OX=9606 GN=LAMP1 PE=1 SV=3	4405	20210911_zy_cell_ethcd_3.3500.3500.3	controllerType=0 controllerNumber=1 scan=3500	16.2517
01776:2	24	R.YN[+1540.529]C[+57.021]SIESPR.K	HexNAc(2)Hex(7)	C[+57], N[+1541]	1333.52	2	2666.03	2666.03	0	0.7	695	Specific	274.32	164.92	164.92	4.93	7	>sp|O00469|PLOD2_HUMAN Procollagen-lysine,2-oxoglutarate 5-dioxygenase 2 OS=Homo sapiens OX=9606 GN=PLOD2 PE=1 SV=2	15649	20210911_zy_cell_ethcd_3.1958.1958.2	controllerType=0 controllerNumber=1 scan=1958	9.2225
02030:3	14	K.KWGHN[+1378.476]ITEFQQR.F	HexNAc(2)Hex(6)	N[+1378]	974.755	3	2922.25	2922.25	0	-0.9	276	Specific	275.03	168.89	168.89	5.72	7	>sp|Q96HE7|ERO1A_HUMAN ERO1-like protein alpha OS=Homo sapiens OX=9606 GN=ERO1A PE=1 SV=2	2944	20210911_zy_cell_ethcd_3.2237.2237.3	controllerType=0 controllerNumber=1 scan=2237	10.4818
01099:3	11	R.TLSRPSETC[+57.021]N[+1702.581]ETTK.L	HexNAc(2)Hex(8)	C[+57], N[+1703]	1109.45	3	3326.34	3326.35	0	-1.2	384	Specific	275.06	193.79	193.79	6.05	9	>sp|Q96AY3|FKB10_HUMAN Peptidyl-prolyl cis-trans isomerase FKBP10 OS=Homo sapiens OX=9606 GN=FKBP10 PE=1 SV=1	19614	20210911_zy_cell_ethcd_3.1214.1214.3	controllerType=0 controllerNumber=1 scan=1214	5.7726
00782:3	2	R.KDN[+2059.735]TTVTR.L	HexNAc(4)Hex(5)Fuc(1)NeuAc(1)	N[+2060]	998.747	3	2994.23	2994.23	0	-1.3	247	Specific	275.56	76.03	76.03	4.64	45	>sp|P11279|LAMP1_HUMAN Lysosome-associated membrane glycoprotein 1 OS=Homo sapiens OX=9606 GN=LAMP1 PE=1 SV=3	4405	20210911_zy_cell_ethcd_3.865.865.3	controllerType=0 controllerNumber=1 scan=865	4.1166
02214:2	17	K.TN[+1540.529]ITLVC[+57.021]K.P	HexNAc(2)Hex(7)	C[+57], N[+1541]	1245.03	2	2489.04	2489.05	0	-0.8	580	Specific	278.03	132.67	132.67	5.27	12	>sp|P11717|MPRI_HUMAN Cation-independent mannose-6-phosphate receptor OS=Homo sapiens OX=9606 GN=IGF2R PE=1 SV=3	12317	20210911_zy_cell_ethcd_3.2439.2439.2	controllerType=0 controllerNumber=1 scan=2439	11.4008
03218:3	10	R.IAPASN[+2026.687]VSHTVVLRPLK.A	HexNAc(2)Hex(10)	N[+2027]	1276.92	3	3828.75	3828.75	0	-0.2	83	Specific	278.59	267.88	267.88	5.58	7	>sp|P43308|SSRB_HUMAN Translocon-associated protein subunit beta OS=Homo sapiens OX=9606 GN=SSR2 PE=1 SV=1	13071	20210911_zy_cell_ethcd_3.3542.3542.3	controllerType=0 controllerNumber=1 scan=3542	16.4431
02397:3	5	K.VPGN[+2350.830]QTSTTLK.L	HexNAc(4)Hex(5)Fuc(1)NeuAc(2)	N[+2351]	1166.15	3	3496.44	3496.45	0	-2.1	668	Specific	280.33	99.97	99.97	4.13	23	>sp|P32004|L1CAM_HUMAN Neural cell adhesion molecule L1 OS=Homo sapiens OX=9606 GN=L1CAM PE=1 SV=2	3537	20210911_zy_cell_ethcd_3.2640.2640.3	controllerType=0 controllerNumber=1 scan=2640	12.3249
03006:2	56	K.N[+1540.529]VSC[+57.021]LWC[+57.021]NTNK.A	HexNAc(2)Hex(7)	C[+57]*2, N[+1541]	1468.57	2	2936.14	2936.14	0	-1.2	54	Specific	280.89	236.57	236.57	5.49	4	>sp|P53801|PTTG_HUMAN Pituitary tumor-transforming gene 1 protein-interacting protein OS=Homo sapiens OX=9606 GN=PTTG1IP PE=1 SV=1	15135	20210911_zy_cell_ethcd_3.3309.3309.2	controllerType=0 controllerNumber=1 scan=3309	15.3694
01758:3	35	R.AN[+1378.476]HSGAVVLLK.R	HexNAc(2)Hex(6)	N[+1378]	829.712	3	2487.12	2487.12	0	-1	322	Specific	281.18	173.95	173.95	5.62	6	>sp|P23229|ITA6_HUMAN Integrin alpha-6 OS=Homo sapiens OX=9606 GN=ITGA6 PE=1 SV=5	4737	20210911_zy_cell_ethcd_3.1939.1939.3	controllerType=0 controllerNumber=1 scan=1939	9.1352
01483:3	4	K.NN[+3229.168]HTASILDR.M	HexNAc(8)Hex(9)Fuc(1)	N[+3229]	1457.25	3	4369.75	4369.74	0	0.3	129	Specific	281.29	135.16	135.16	5.39	19	>sp|P08962|CD63_HUMAN CD63 antigen OS=Homo sapiens OX=9606 GN=CD63 PE=1 SV=2	5151	20210911_zy_cell_ethcd_3.1636.1636.3	controllerType=0 controllerNumber=1 scan=1636	7.7515
03139:3	2	R.GHTLTLN[+2188.740]FTR.N	HexNAc(2)Hex(11)	N[+2189]	1116.79	3	3348.36	3348.36	0	-1	97	Specific	282.3	156.44	156.44	5.71	45	>sp|P11279|LAMP1_HUMAN Lysosome-associated membrane glycoprotein 1 OS=Homo sapiens OX=9606 GN=LAMP1 PE=1 SV=3	4405	20210911_zy_cell_ethcd_3.3455.3455.3	controllerType=0 controllerNumber=1 scan=3455	16.0435
05697:3	1	R.NPC[+57.021]TSEQN[+2350.830]C[+57.021]TSPFSYK.N	HexNAc(4)Hex(5)Fuc(1)NeuAc(2)	C[+57]*2, N[+2351]	1424.21	3	4270.62	4270.62	0	0.6	205	Specific	282.58	161.41	161.41	4.27	30	>sp|P05556|ITB1_HUMAN Integrin beta-1 OS=Homo sapiens OX=9606 GN=ITGB1 PE=1 SV=2	3061	20210911_zy_cell_ethcd_3.6276.6276.3	controllerType=0 controllerNumber=1 scan=6276	28.8723
00793:3	48	K.YIHQN[+1702.581]YTK.A	HexNAc(2)Hex(8)	N[+1703]	923.709	3	2769.11	2769.11	0	-0.5	534	Specific	284.68	128.8	128.8	4.76	6	>sp|Q02809|PLOD1_HUMAN Procollagen-lysine,2-oxoglutarate 5-dioxygenase 1 OS=Homo sapiens OX=9606 GN=PLOD1 PE=1 SV=2	10199	20210911_zy_cell_ethcd_3.877.877.3	controllerType=0 controllerNumber=1 scan=877	4.1715
02333:2	98	R.N[+1702.581]ISQVLEK.K	HexNAc(2)Hex(8)	N[+1703]	1317.06	2	2633.1	2633.11	0	-0.7	439	Specific	284.72	93.54	93.54	4.53	3	>sp|O14672|ADA10_HUMAN Disintegrin and metalloproteinase domain-containing protein 10 OS=Homo sapiens OX=9606 GN=ADAM10 PE=1 SV=1	717	20210911_zy_cell_ethcd_3.2570.2570.2	controllerType=0 controllerNumber=1 scan=2570	12.0032
02857:3	19	K.GLN[+1864.634]LTEDTYKPR.I	HexNAc(2)Hex(9)	N[+1865]	1091.12	3	3271.36	3271.36	0	-1.2	396	Specific	285.09	149.39	149.39	5.71	8	>sp|Q08380|LG3BP_HUMAN Galectin-3-binding protein OS=Homo sapiens OX=9606 GN=LGALS3BP PE=1 SV=1	4876	20210911_zy_cell_ethcd_3.3145.3145.3	controllerType=0 controllerNumber=1 scan=3145	14.6254
01761:3	8	K.PIN[+1864.634]TTGTLKPDDR.V	HexNAc(2)Hex(9)	N[+1865]	1098.13	3	3292.38	3292.38	0	-0.9	262	Specific	286.39	147.18	147.18	5.92	10	>sp|Q92542|NICA_HUMAN Nicastrin OS=Homo sapiens OX=9606 GN=NCSTN PE=1 SV=2	7240	20210911_zy_cell_ethcd_3.1942.1942.3	controllerType=0 controllerNumber=1 scan=1942	9.1496
01526:3	4	K.NN[+1768.640]HTASILDR.M	HexNAc(4)Hex(5)Fuc(1)	N[+1769]	970.408	3	2909.21	2909.22	0	-1.7	129	Specific	286.51	131.49	131.49	5.06	19	>sp|P08962|CD63_HUMAN CD63 antigen OS=Homo sapiens OX=9606 GN=CD63 PE=1 SV=2	5151	20210911_zy_cell_ethcd_3.1684.1684.3	controllerType=0 controllerNumber=1 scan=1684	7.9597
02273:2	49	K.ALSPN[+1378.476]STISSAPK.D	HexNAc(2)Hex(6)	N[+1378]	1326.08	2	2651.15	2651.16	0	-0.3	632	Specific	287.64	144.7	144.7	5.61	3	>sp|Q9UH99|SUN2_HUMAN SUN domain-containing protein 2 OS=Homo sapiens OX=9606 GN=SUN2 PE=1 SV=3	18015	20210911_zy_cell_ethcd_3.2504.2504.2	controllerType=0 controllerNumber=1 scan=2504	11.7015
01768:2	24	R.YN[+1702.581]C[+57.021]SIESPR.K	HexNAc(2)Hex(8)	C[+57], N[+1703]	1414.54	2	2828.08	2828.08	0	0.3	695	Specific	288.9	155.84	155.84	4.82	7	>sp|O00469|PLOD2_HUMAN Procollagen-lysine,2-oxoglutarate 5-dioxygenase 2 OS=Homo sapiens OX=9606 GN=PLOD2 PE=1 SV=2	15649	20210911_zy_cell_ethcd_3.1950.1950.2	controllerType=0 controllerNumber=1 scan=1950	9.1839
03986:2	44	K.DSLSIN[+1540.529]ATNIK.H	HexNAc(2)Hex(7)	N[+1541]	1358.58	2	2716.16	2716.16	0	0.3	347	Specific	293.52	176.42	176.42	5.3	6	>sp|P00533|EGFR_HUMAN Epidermal growth factor receptor OS=Homo sapiens OX=9606 GN=EGFR PE=1 SV=2	19596	20210911_zy_cell_ethcd_3.4385.4385.2	controllerType=0 controllerNumber=1 scan=4385	20.2847
02241:2	90	K.VN[+1540.529]ETEMDIAK.H	HexNAc(2)Hex(7)	N[+1541]	1345.54	2	2690.07	2690.07	0	0.1	159	Specific	294.22	187.5	187.5	5.3	1	>sp|O75629|CREG1_HUMAN Protein CREG1 OS=Homo sapiens OX=9606 GN=CREG1 PE=1 SV=1	19520	20210911_zy_cell_ethcd_3.2469.2469.2	controllerType=0 controllerNumber=1 scan=2469	11.5352
01164:3	26	R.GN[+2350.830]VTQHVQGHR.N	HexNAc(4)Hex(5)Fuc(1)NeuAc(2)	N[+2351]	1195.16	3	3583.45	3583.45	0	-1	76	Specific	295.1	116.93	116.93	5.35	7	>sp|Q15043|S39AE_HUMAN Zinc transporter ZIP14 OS=Homo sapiens OX=9606 GN=SLC39A14 PE=1 SV=3	16204	20210911_zy_cell_ethcd_3.1286.1286.3	controllerType=0 controllerNumber=1 scan=1286	6.1105
02594:3	5	R.THN[+1216.423]LTDLSPHLR.Y	HexNAc(2)Hex(5)	N[+1216]	874.057	3	2620.16	2620.16	0	-2.2	977	Specific	296.6	176.22	176.22	4.92	23	>sp|P32004|L1CAM_HUMAN Neural cell adhesion molecule L1 OS=Homo sapiens OX=9606 GN=L1CAM PE=1 SV=2	3537	20210911_zy_cell_ethcd_3.2856.2856.3	controllerType=0 controllerNumber=1 scan=2856	13.3142
02832:3	94	R.EASIVGEN[+1864.634]ETYPR.A	HexNAc(2)Hex(9)	N[+1865]	1110.45	3	3329.33	3329.33	0	-1.6	601	Specific	296.62	192.42	192.42	5.02	1	>sp|Q9UBV2|SE1L1_HUMAN Protein sel-1 homolog 1 OS=Homo sapiens OX=9606 GN=SEL1L PE=1 SV=3	14445	20210911_zy_cell_ethcd_3.3118.3118.3	controllerType=0 controllerNumber=1 scan=3118	14.5054
02385:2	2	R.LLNINPN[+1540.529]K.T	HexNAc(2)Hex(7)	N[+1541]	1233.54	2	2466.07	2466.08	0	-0.2	255	Specific	296.73	107.81	107.81	4.53	45	>sp|P11279|LAMP1_HUMAN Lysosome-associated membrane glycoprotein 1 OS=Homo sapiens OX=9606 GN=LAMP1 PE=1 SV=3	4405	20210911_zy_cell_ethcd_3.2627.2627.2	controllerType=0 controllerNumber=1 scan=2627	12.2639
05120:3	1	K.LRNPC[+57.021]TSEQN[+2350.830]C[+57.021]TSPFSYK.N	HexNAc(4)Hex(5)Fuc(1)NeuAc(2)	C[+57]*2, N[+2351]	1513.94	3	4539.8	4539.81	0	-1.4	203	Specific	297.48	186.01	186.01	5.72	30	>sp|P05556|ITB1_HUMAN Integrin beta-1 OS=Homo sapiens OX=9606 GN=ITGB1 PE=1 SV=2	3061	20210911_zy_cell_ethcd_3.5633.5633.3	controllerType=0 controllerNumber=1 scan=5633	25.9778
02589:3	5	R.THN[+1768.640]LTDLSPHLR.Y	HexNAc(4)Hex(5)Fuc(1)	N[+1769]	1058.13	3	3172.37	3172.38	0	-1.6	977	Specific	298.65	135.08	135.08	5.6	23	>sp|P32004|L1CAM_HUMAN Neural cell adhesion molecule L1 OS=Homo sapiens OX=9606 GN=L1CAM PE=1 SV=2	3537	20210911_zy_cell_ethcd_3.2851.2851.3	controllerType=0 controllerNumber=1 scan=2851	13.2911
01570:3	20	K.KKPN[+2350.830]ATAEPTPPDR.W	HexNAc(4)Hex(5)Fuc(1)NeuAc(2)	N[+2351]	1291.55	3	3872.63	3872.63	0	-0.2	361	Specific	298.67	134.28	134.28	5.51	12	>sp|Q9UBG0|MRC2_HUMAN C-type mannose receptor 2 OS=Homo sapiens OX=9606 GN=MRC2 PE=1 SV=2	16756	20210911_zy_cell_ethcd_3.1732.1732.3	controllerType=0 controllerNumber=1 scan=1732	8.1841
01223:3	2	R.KDN[+2715.963]TTVTR.L	HexNAc(5)Hex(6)Fuc(1)NeuAc(2)	N[+2716]	1217.49	3	3650.45	3650.46	0	-0.8	247	Specific	298.83	66.64	66.64	4.45	45	>sp|P11279|LAMP1_HUMAN Lysosome-associated membrane glycoprotein 1 OS=Homo sapiens OX=9606 GN=LAMP1 PE=1 SV=3	4405	20210911_zy_cell_ethcd_3.1351.1351.3	controllerType=0 controllerNumber=1 scan=1351	6.4209
03221:3	10	R.IAPASN[+1378.476]VSHTVVLRPLK.A	HexNAc(2)Hex(6)	N[+1378]	1060.85	3	3180.54	3180.54	0	-0.3	83	Specific	299.75	299.75	299.75	6.01	7	>sp|P43308|SSRB_HUMAN Translocon-associated protein subunit beta OS=Homo sapiens OX=9606 GN=SSR2 PE=1 SV=1	13071	20210911_zy_cell_ethcd_3.3545.3545.3	controllerType=0 controllerNumber=1 scan=3545	16.4571
01382:3	17	K.MN[+1864.634]FTGGDTC[+57.021]HK.V	HexNAc(2)Hex(9)	C[+57], N[+1865]	1044.72	3	3132.15	3132.15	0	-1	1311	Specific	301	188.88	188.88	5.62	12	>sp|P11717|MPRI_HUMAN Cation-independent mannose-6-phosphate receptor OS=Homo sapiens OX=9606 GN=IGF2R PE=1 SV=3	12317	20210911_zy_cell_ethcd_3.1526.1526.3	controllerType=0 controllerNumber=1 scan=1526	7.2441
02989:3	16	R.KIPAIN[+1378.476]QTITEANEK.T	HexNAc(2)Hex(6)	N[+1378]	1016.8	3	3048.38	3048.39	0	-1.3	1390	Specific	305.09	211.53	211.53	5.71	11	>sp|P11047|LAMC1_HUMAN Laminin subunit gamma-1 OS=Homo sapiens OX=9606 GN=LAMC1 PE=1 SV=3	4746	20210911_zy_cell_ethcd_3.3290.3290.3	controllerType=0 controllerNumber=1 scan=3290	15.2894
04367:3	46	K.VPLQSAHLYYN[+1864.634]VTEK.V	HexNAc(2)Hex(9)	N[+1865]	1209.52	3	3626.55	3626.55	0	-1.1	530	Specific	306.02	196.37	196.37	5.84	4	>sp|Q32P28|P3H1_HUMAN Prolyl 3-hydroxylase 1 OS=Homo sapiens OX=9606 GN=P3H1 PE=1 SV=2	15467	20210911_zy_cell_ethcd_3.4805.4805.3	controllerType=0 controllerNumber=1 scan=4805	22.2265
03078:3	21	R.LEN[+1540.529]ITTGTYTIHAQK.E	HexNAc(2)Hex(7)	N[+1541]	1077.47	3	3230.4	3230.41	0	-1.6	367	Specific	306.37	206.56	206.56	5.71	5	>sp|Q5JPE7|NOMO2_HUMAN Nodal modulator 2 OS=Homo sapiens OX=9606 GN=NOMO2 PE=1 SV=1	6463	20210911_zy_cell_ethcd_3.3388.3388.3	controllerType=0 controllerNumber=1 scan=3388	15.7257
01313:2	88	K.VN[+1702.581]NTAVIEK.Q	HexNAc(2)Hex(8)	N[+1703]	1345.57	2	2690.13	2690.13	0	-0.5	550	Specific	310.73	137.29	137.29	5.39	1	>sp|Q9H330|TM245_HUMAN Transmembrane protein 245 OS=Homo sapiens OX=9606 GN=TMEM245 PE=1 SV=3	16010	20210911_zy_cell_ethcd_3.1450.1450.2	controllerType=0 controllerNumber=1 scan=1450	6.8838
01717:2	42	K.N[+1540.529]QSVPLSC[+57.021]C[+57.021]R.E	HexNAc(2)Hex(7)	C[+57]*2, N[+1541]	1381.04	2	2761.08	2761.08	0	-0.1	167	Specific	313.32	215.79	215.79	5.18	4	>sp|O60637|TSN3_HUMAN Tetraspanin-3 OS=Homo sapiens OX=9606 GN=TSPAN3 PE=2 SV=1	16532	20210911_zy_cell_ethcd_3.1894.1894.2	controllerType=0 controllerNumber=1 scan=1894	8.9313
02082:2	69	R.N[+1702.581]WTITR.L	HexNAc(2)Hex(8)	N[+1703]	1247	2	2493	2493	0	-2.1	651	Specific	313.79	86.32	86.32	4.27	5	>sp|P19022|CADH2_HUMAN Cadherin-2 OS=Homo sapiens OX=9606 GN=CDH2 PE=1 SV=4	1389	20210911_zy_cell_ethcd_3.2294.2294.3	controllerType=0 controllerNumber=1 scan=2294	10.745
02038:2	51	R.TVN[+1702.581]VSVPK.K	HexNAc(2)Hex(8)	N[+1703]	1273.54	2	2546.08	2546.07	0	0.2	89	Specific	316.28	219.8	219.8	4.56	4	>sp|Q96KA5|CLP1L_HUMAN Cleft lip and palate transmembrane protein 1-like protein OS=Homo sapiens OX=9606 GN=CLPTM1L PE=1 SV=1	1199	20210911_zy_cell_ethcd_3.2246.2246.2	controllerType=0 controllerNumber=1 scan=2246	10.5217
02363:2	2	R.LLNINPN[+1702.581]K.T	HexNAc(2)Hex(8)	N[+1703]	1314.57	2	2628.13	2628.13	0	0	255	Specific	317.07	159.54	159.54	4.76	45	>sp|P11279|LAMP1_HUMAN Lysosome-associated membrane glycoprotein 1 OS=Homo sapiens OX=9606 GN=LAMP1 PE=1 SV=3	4405	20210911_zy_cell_ethcd_3.2603.2603.2	controllerType=0 controllerNumber=1 scan=2603	12.1513
02015:3	6	R.YN[+1702.581]HTGQVIIYR.M	HexNAc(2)Hex(8)	N[+1703]	1022.77	3	3066.29	3066.29	0	-1.2	459	Specific	318.25	179.24	179.24	5.62	14	>sp|P56199|ITA1_HUMAN Integrin alpha-1 OS=Homo sapiens OX=9606 GN=ITGA1 PE=1 SV=2	9701	20210911_zy_cell_ethcd_3.2221.2221.3	controllerType=0 controllerNumber=1 scan=2221	10.4112
02180:3	92	R.HVYNN[+2350.830]LTEEQK.G	HexNAc(4)Hex(5)Fuc(1)NeuAc(2)	N[+2351]	1242.5	3	3725.49	3725.5	0	-0.6	70	Specific	319.18	110.32	110.32	5.14	1	>sp|Q9H6B4|CLMP_HUMAN CXADR-like membrane protein OS=Homo sapiens OX=9606 GN=CLMP PE=1 SV=1	801	20210911_zy_cell_ethcd_3.2402.2402.3	controllerType=0 controllerNumber=1 scan=2402	11.2311
01085:2	57	R.N[+1702.581]VTWK.L	HexNAc(2)Hex(8)	N[+1703]	1175.47	2	2349.93	2349.93	0	-1.4	125	Specific	321.6	133.87	133.87	5.2	6	>sp|P50454|SERPH_HUMAN Serpin H1 OS=Homo sapiens OX=9606 GN=SERPINH1 PE=1 SV=2	16343	20210911_zy_cell_ethcd_3.1199.1199.2	controllerType=0 controllerNumber=1 scan=1199	5.6977
02050:2	51	R.TVN[+1540.529]VSVPK.K	HexNAc(2)Hex(7)	N[+1541]	1192.51	2	2384.02	2384.02	0	-0.6	89	Specific	321.72	239.56	239.56	4.69	4	>sp|Q96KA5|CLP1L_HUMAN Cleft lip and palate transmembrane protein 1-like protein OS=Homo sapiens OX=9606 GN=CLPTM1L PE=1 SV=1	1199	20210911_zy_cell_ethcd_3.2259.2259.2	controllerType=0 controllerNumber=1 scan=2259	10.5806
01224:3	28	K.HTNM[+15.995]N[+1702.581]LTQLK.V	HexNAc(2)Hex(8)	M[+16], N[+1703]	973.403	3	2918.19	2918.2	0	-1.2	250	Specific	322.06	143.99	143.99	5.84	6	>sp|Q15165|PON2_HUMAN Serum paraoxonase/arylesterase 2 OS=Homo sapiens OX=9606 GN=PON2 PE=1 SV=4	9244	20210911_zy_cell_ethcd_3.1352.1352.3	controllerType=0 controllerNumber=1 scan=1352	6.426
03211:3	1	K.KDTC[+57.021]TQEC[+57.021]SYFN[+1378.476]ITK.V	HexNAc(2)Hex(6)	C[+57]*2, N[+1378]	1091.77	3	3273.31	3273.31	0	-0.4	658	Specific	323.51	236.88	236.88	5.53	30	>sp|P05556|ITB1_HUMAN Integrin beta-1 OS=Homo sapiens OX=9606 GN=ITGB1 PE=1 SV=2	3061	20210911_zy_cell_ethcd_3.3534.3534.3	controllerType=0 controllerNumber=1 scan=3534	16.408
02629:2	47	R.FINYN[+1864.634]QTVSR.M	HexNAc(2)Hex(9)	N[+1865]	1553.63	2	3106.26	3106.26	0	-1	909	Specific	325.32	162.52	162.52	5.75	4	>sp|Q8N766|EMC1_HUMAN ER membrane protein complex subunit 1 OS=Homo sapiens OX=9606 GN=EMC1 PE=1 SV=1	4991	20210911_zy_cell_ethcd_3.2895.2895.2	controllerType=0 controllerNumber=1 scan=2895	13.4837
04557:3	2	R.GHTLTLN[+1872.651]FTR.N	HexNAc(3)Hex(6)NeuAc(1)	N[+1873]	1011.43	3	3032.27	3032.27	0	-1.7	97	Specific	331.01	194.15	194.15	5.75	45	>sp|P11279|LAMP1_HUMAN Lysosome-associated membrane glycoprotein 1 OS=Homo sapiens OX=9606 GN=LAMP1 PE=1 SV=3	4405	20210911_zy_cell_ethcd_3.5014.5014.3	controllerType=0 controllerNumber=1 scan=5014	23.1642
01809:3	4	K.NN[+3155.132]HTASILDR.M	HexNAc(7)Hex(8)Fuc(1)NeuAc(1)	N[+3155]	1432.24	3	4294.71	4295.71	-1	0.3	129	Specific	331.22	147.27	147.27	4.99	19	>sp|P08962|CD63_HUMAN CD63 antigen OS=Homo sapiens OX=9606 GN=CD63 PE=1 SV=2	5151	20210911_zy_cell_ethcd_3.1995.1995.3	controllerType=0 controllerNumber=1 scan=1995	9.3949
01838:3	4	K.NN[+2586.920]HTASILDR.M	HexNAc(5)Hex(7)Fuc(1)NeuAc(1)	N[+2587]	1243.17	3	3727.49	3727.5	0	-1.1	129	Specific	333.94	105.52	105.52	5.59	19	>sp|P08962|CD63_HUMAN CD63 antigen OS=Homo sapiens OX=9606 GN=CD63 PE=1 SV=2	5151	20210911_zy_cell_ethcd_3.2027.2027.3	controllerType=0 controllerNumber=1 scan=2027	9.5406
04383:3	46	K.VPLQSAHLYYN[+1702.581]VTEK.V	HexNAc(2)Hex(8)	N[+1703]	1155.5	3	3464.5	3464.5	0	-0.8	530	Specific	335.14	216.58	216.58	5.85	4	>sp|Q32P28|P3H1_HUMAN Prolyl 3-hydroxylase 1 OS=Homo sapiens OX=9606 GN=P3H1 PE=1 SV=2	15467	20210911_zy_cell_ethcd_3.4823.4823.3	controllerType=0 controllerNumber=1 scan=4823	22.3079
02344:3	36	R.DN[+1702.581]ATLQATLHAAR.D	HexNAc(2)Hex(8)	N[+1703]	1028.77	3	3084.3	3084.3	0	-1.4	2422	Specific	336.99	208.81	208.81	5.85	5	>sp|O15230|LAMA5_HUMAN Laminin subunit alpha-5 OS=Homo sapiens OX=9606 GN=LAMA5 PE=1 SV=8	2334	20210911_zy_cell_ethcd_3.2582.2582.3	controllerType=0 controllerNumber=1 scan=2582	12.0596
01375:3	17	K.MN[+1702.581]FTGGDTC[+57.021]HK.V	HexNAc(2)Hex(8)	C[+57], N[+1703]	990.704	3	2970.1	2970.1	0	-1.2	1311	Specific	337.14	230.51	230.51	5.63	12	>sp|P11717|MPRI_HUMAN Cation-independent mannose-6-phosphate receptor OS=Homo sapiens OX=9606 GN=IGF2R PE=1 SV=3	12317	20210911_zy_cell_ethcd_3.1518.1518.3	controllerType=0 controllerNumber=1 scan=1518	7.2086
02406:3	5	K.VPGN[+2350.830]QTSTTLK.L	HexNAc(4)Hex(5)Fuc(1)NeuAc(2)	N[+2351]	1166.15	3	3496.44	3496.45	0	-1.5	668	Specific	338.05	144.35	144.35	5.03	23	>sp|P32004|L1CAM_HUMAN Neural cell adhesion molecule L1 OS=Homo sapiens OX=9606 GN=L1CAM PE=1 SV=2	3537	20210911_zy_cell_ethcd_3.2650.2650.3	controllerType=0 controllerNumber=1 scan=2650	12.3684
00742:3	5	R.VTYQNHN[+1913.677]K.T	HexNAc(4)Hex(5)NeuAc(1)	N[+1914]	973.06	3	2917.16	2917.17	0	-2.9	288	Specific	338.29	95.91	95.91	4.39	23	>sp|P32004|L1CAM_HUMAN Neural cell adhesion molecule L1 OS=Homo sapiens OX=9606 GN=L1CAM PE=1 SV=2	3537	20210911_zy_cell_ethcd_3.820.820.3	controllerType=0 controllerNumber=1 scan=820	3.9024
03743:3	95	K.SC[+57.021]VAVTSAQPQN[+2204.772]MSR.R	HexNAc(4)Hex(5)NeuAc(2)	C[+57], N[+2205]	1280.85	3	3840.53	3840.53	0	-1.2	517	Specific	340.39	209.59	209.59	5.03	1	>sp|O15031|PLXB2_HUMAN Plexin-B2 OS=Homo sapiens OX=9606 GN=PLXNB2 PE=1 SV=3	14843	20210911_zy_cell_ethcd_3.4118.4118.3	controllerType=0 controllerNumber=1 scan=4118	19.0737
01787:2	6	R.N[+1702.581]TTFNVESTK.K	HexNAc(2)Hex(8)	N[+1703]	1422.07	2	2843.13	2843.13	0	0.1	418	Specific	340.45	245.32	245.32	5.43	14	>sp|P56199|ITA1_HUMAN Integrin alpha-1 OS=Homo sapiens OX=9606 GN=ITGA1 PE=1 SV=2	9701	20210911_zy_cell_ethcd_3.1971.1971.2	controllerType=0 controllerNumber=1 scan=1971	9.2823
01487:3	4	K.NN[+2498.904]HTASILDR.M	HexNAc(6)Hex(7)Fuc(1)	N[+2499]	1213.83	3	3639.47	3639.48	0	-1.9	129	Specific	345.74	175.29	175.29	5.15	19	>sp|P08962|CD63_HUMAN CD63 antigen OS=Homo sapiens OX=9606 GN=CD63 PE=1 SV=2	5151	20210911_zy_cell_ethcd_3.1641.1641.3	controllerType=0 controllerNumber=1 scan=1641	7.7724
07674:3	77	R.N[+1702.581]C[+57.021]SAAPQPEPAAGLASYPELR.L	HexNAc(2)Hex(8)	C[+57], N[+1703]	1301.21	3	3901.62	3901.63	0	-2.2	87	Specific	345.79	302.68	302.68	4.69	3	>sp|O75718|CRTAP_HUMAN Cartilage-associated protein OS=Homo sapiens OX=9606 GN=CRTAP PE=1 SV=1	8728	20210911_zy_cell_ethcd_3.8526.8526.3	controllerType=0 controllerNumber=1 scan=8526	38.8984
00948:4	33	K.YPHNHHVVN[+1864.634]NTLEGN[+1702.581]C[+57.021]SSK.S	HexNAc(2)Hex(9),HexNAc(2)Hex(8)	C[+57], N[+1703][+1865]	1444.56	4	5775.22	5774.22	1	0.2	103	Specific	347.71	328.01	117.83	6.44	7	>sp|P15586|GNS_HUMAN N-acetylglucosamine-6-sulfatase OS=Homo sapiens OX=9606 GN=GNS PE=1 SV=3	5993	20210911_zy_cell_ethcd_3.1047.1047.4	controllerType=0 controllerNumber=1 scan=1047	4.9756
03955:3	59	K.IN[+2350.830]ATDADEPNTLNSK.I	HexNAc(4)Hex(5)Fuc(1)NeuAc(2)	N[+2351]	1318.53	3	3953.59	3953.59	0	-0.4	181	Specific	350.43	228.98	228.98	4.73	4	>sp|Q14126|DSG2_HUMAN Desmoglein-2 OS=Homo sapiens OX=9606 GN=DSG2 PE=1 SV=2	1442	20210911_zy_cell_ethcd_3.4351.4351.3	controllerType=0 controllerNumber=1 scan=4351	20.1311
01126:3	1	K.C[+57.021]HEGN[+1540.529]GTFEC[+57.021]GAC[+57.021]R.C	HexNAc(2)Hex(7)	C[+57]*3, N[+1541]	1065.72	3	3195.15	3195.14	0	0.3	477	Specific	351.04	351.04	351.04	5.98	30	>sp|P05556|ITB1_HUMAN Integrin beta-1 OS=Homo sapiens OX=9606 GN=ITGB1 PE=1 SV=2	3061	20210911_zy_cell_ethcd_3.1244.1244.3	controllerType=0 controllerNumber=1 scan=1244	5.914
01354:3	4	K.NN[+1864.634]HTASILDR.M	HexNAc(2)Hex(9)	N[+1865]	1002.41	3	3005.21	3005.21	0	-1.1	129	Specific	351.51	199.96	199.96	5.75	19	>sp|P08962|CD63_HUMAN CD63 antigen OS=Homo sapiens OX=9606 GN=CD63 PE=1 SV=2	5151	20210911_zy_cell_ethcd_3.1495.1495.3	controllerType=0 controllerNumber=1 scan=1495	7.0974
01737:2	42	K.N[+1378.476]QSVPLSC[+57.021]C[+57.021]R.E	HexNAc(2)Hex(6)	C[+57]*2, N[+1378]	1300.02	2	2599.02	2599.03	0	-0.7	167	Specific	351.53	260.71	260.71	5.74	4	>sp|O60637|TSN3_HUMAN Tetraspanin-3 OS=Homo sapiens OX=9606 GN=TSPAN3 PE=2 SV=1	16532	20210911_zy_cell_ethcd_3.1916.1916.2	controllerType=0 controllerNumber=1 scan=1916	9.0303
00856:3	26	R.GN[+2059.735]VTQHVQGHR.N	HexNAc(4)Hex(5)Fuc(1)NeuAc(1)	N[+2060]	1098.12	3	3292.36	3292.36	0	-0.7	76	Specific	351.64	154.75	154.75	5.42	7	>sp|Q15043|S39AE_HUMAN Zinc transporter ZIP14 OS=Homo sapiens OX=9606 GN=SLC39A14 PE=1 SV=3	16204	20210911_zy_cell_ethcd_3.946.946.3	controllerType=0 controllerNumber=1 scan=946	4.4918
02986:2	56	K.N[+1702.581]VSC[+57.021]LWC[+57.021]NTNK.A	HexNAc(2)Hex(8)	C[+57]*2, N[+1703]	1549.6	2	3098.2	3098.2	0	-0.2	54	Specific	356.17	309.34	309.34	5.47	4	>sp|P53801|PTTG_HUMAN Pituitary tumor-transforming gene 1 protein-interacting protein OS=Homo sapiens OX=9606 GN=PTTG1IP PE=1 SV=1	15135	20210911_zy_cell_ethcd_3.3287.3287.2	controllerType=0 controllerNumber=1 scan=3287	15.2748
01353:2	66	K.N[+1864.634]YTADYDK.A	HexNAc(2)Hex(9)	N[+1865]	1427.53	2	2854.06	2854.06	0	0.1	106	Specific	356.41	280.02	280.02	4.8	2	>sp|O94905|ERLN2_HUMAN Erlin-2 OS=Homo sapiens OX=9606 GN=ERLIN2 PE=1 SV=1	5719	20210911_zy_cell_ethcd_3.1494.1494.2	controllerType=0 controllerNumber=1 scan=1494	7.0912
03253:3	2	R.GHTLTLN[+1581.555]FTR.N	HexNAc(3)Hex(6)	N[+1582]	914.396	3	2741.17	2741.18	0	-1.2	97	Specific	358.75	203.02	203.02	5.63	45	>sp|P11279|LAMP1_HUMAN Lysosome-associated membrane glycoprotein 1 OS=Homo sapiens OX=9606 GN=LAMP1 PE=1 SV=3	4405	20210911_zy_cell_ethcd_3.3580.3580.3	controllerType=0 controllerNumber=1 scan=3580	16.6146
03158:3	1	K.KDTC[+57.021]TQEC[+57.021]SYFN[+1702.581]ITK.V	HexNAc(2)Hex(8)	C[+57]*2, N[+1703]	1199.81	3	3597.41	3597.41	0	-0.9	658	Specific	358.81	261.82	261.82	5.96	30	>sp|P05556|ITB1_HUMAN Integrin beta-1 OS=Homo sapiens OX=9606 GN=ITGB1 PE=1 SV=2	3061	20210911_zy_cell_ethcd_3.3476.3476.3	controllerType=0 controllerNumber=1 scan=3476	16.1399
04779:3	23	R.TILVDNNTWN[+1540.529]NTHISR.V	HexNAc(2)Hex(7)	N[+1541]	1146.83	3	3438.48	3438.48	0	-0.6	539	Specific	364.61	219.14	78.63	5.42	3	>sp|P46977|STT3A_HUMAN Dolichyl-diphosphooligosaccharide--protein glycosyltransferase subunit STT3A OS=Homo sapiens OX=9606 GN=STT3A PE=1 SV=2	18762	20210911_zy_cell_ethcd_3.5258.5258.3	controllerType=0 controllerNumber=1 scan=5258	24.275
01077:3	2	R.KDN[+2715.963]TTVTR.L	HexNAc(5)Hex(6)Fuc(1)NeuAc(2)	N[+2716]	1217.49	3	3650.46	3650.46	0	-0.3	247	Specific	366.03	117.18	117.18	4.55	45	>sp|P11279|LAMP1_HUMAN Lysosome-associated membrane glycoprotein 1 OS=Homo sapiens OX=9606 GN=LAMP1 PE=1 SV=3	4405	20210911_zy_cell_ethcd_3.1190.1190.3	controllerType=0 controllerNumber=1 scan=1190	5.6544
02864:3	19	K.GLN[+1702.581]LTEDTYKPR.I	HexNAc(2)Hex(8)	N[+1703]	1037.11	3	3109.3	3109.31	0	-1.7	396	Specific	367.52	216.43	216.43	5.52	8	>sp|Q08380|LG3BP_HUMAN Galectin-3-binding protein OS=Homo sapiens OX=9606 GN=LGALS3BP PE=1 SV=1	4876	20210911_zy_cell_ethcd_3.3153.3153.3	controllerType=0 controllerNumber=1 scan=3153	14.66
03342:3	20	R.VTPAC[+57.021]N[+2350.830]TSLPAQR.W	HexNAc(4)Hex(5)Fuc(1)NeuAc(2)	C[+57], N[+2351]	1255.85	3	3765.54	3765.54	0	0	64	Specific	368.54	176.26	176.26	4.74	12	>sp|Q9UBG0|MRC2_HUMAN C-type mannose receptor 2 OS=Homo sapiens OX=9606 GN=MRC2 PE=1 SV=2	16756	20210911_zy_cell_ethcd_3.3678.3678.3	controllerType=0 controllerNumber=1 scan=3678	17.0551
03433:3	5	R.THN[+1872.651]LTDLSPHLR.Y	HexNAc(3)Hex(6)NeuAc(1)	N[+1873]	1092.8	3	3276.39	3276.39	0	-1	977	Specific	369.19	151.39	151.39	5.63	23	>sp|P32004|L1CAM_HUMAN Neural cell adhesion molecule L1 OS=Homo sapiens OX=9606 GN=L1CAM PE=1 SV=2	3537	20210911_zy_cell_ethcd_3.3778.3778.3	controllerType=0 controllerNumber=1 scan=3778	17.5168
01966:2	16	R.VN[+1378.476]NTLSSQISR.L	HexNAc(2)Hex(6)	N[+1378]	1299.06	2	2597.12	2597.12	0	0.1	1106	Specific	372.67	171.32	171.32	5.33	11	>sp|P11047|LAMC1_HUMAN Laminin subunit gamma-1 OS=Homo sapiens OX=9606 GN=LAMC1 PE=1 SV=3	4746	20210911_zy_cell_ethcd_3.2167.2167.2	controllerType=0 controllerNumber=1 scan=2167	10.1675
01974:3	28	K.HTNMN[+1702.581]LTQLK.V	HexNAc(2)Hex(8)	N[+1703]	968.072	3	2902.2	2902.2	0	-0.4	250	Specific	372.78	206.87	206.87	5.21	6	>sp|Q15165|PON2_HUMAN Serum paraoxonase/arylesterase 2 OS=Homo sapiens OX=9606 GN=PON2 PE=1 SV=4	9244	20210911_zy_cell_ethcd_3.2176.2176.3	controllerType=0 controllerNumber=1 scan=2176	10.2068
02334:3	36	R.DN[+1864.634]ATLQATLHAAR.D	HexNAc(2)Hex(9)	N[+1865]	1082.79	3	3246.35	3246.35	0	-1.6	2422	Specific	374.45	233.04	233.04	5.74	5	>sp|O15230|LAMA5_HUMAN Laminin subunit alpha-5 OS=Homo sapiens OX=9606 GN=LAMA5 PE=1 SV=8	2334	20210911_zy_cell_ethcd_3.2571.2571.3	controllerType=0 controllerNumber=1 scan=2571	12.0087
01498:3	4	K.NN[+2133.772]HTASILDR.M	HexNAc(5)Hex(6)Fuc(1)	N[+2134]	1092.12	3	3274.34	3274.35	0	-1	129	Specific	378.11	192.5	192.5	5.64	19	>sp|P08962|CD63_HUMAN CD63 antigen OS=Homo sapiens OX=9606 GN=CD63 PE=1 SV=2	5151	20210911_zy_cell_ethcd_3.1653.1653.3	controllerType=0 controllerNumber=1 scan=1653	7.823
01334:3	11	R.YHYN[+1378.476]GTFEDGKK.F	HexNAc(2)Hex(6)	N[+1378]	946.384	3	2837.14	2837.14	0	-1.2	67	Specific	382.61	278.31	278.31	4.86	9	>sp|Q96AY3|FKB10_HUMAN Peptidyl-prolyl cis-trans isomerase FKBP10 OS=Homo sapiens OX=9606 GN=FKBP10 PE=1 SV=1	19614	20210911_zy_cell_ethcd_3.1473.1473.3	controllerType=0 controllerNumber=1 scan=1473	6.9935
02599:3	14	K.WGHN[+1378.476]ITEFQQR.F	HexNAc(2)Hex(6)	N[+1378]	932.056	3	2794.15	2794.16	0	-1	277	Specific	382.75	241.95	241.95	5.63	7	>sp|Q96HE7|ERO1A_HUMAN ERO1-like protein alpha OS=Homo sapiens OX=9606 GN=ERO1A PE=1 SV=2	2944	20210911_zy_cell_ethcd_3.2862.2862.3	controllerType=0 controllerNumber=1 scan=2862	13.3386
05951:3	31	K.C[+57.021]NMIN[+1702.581]GTDGDSFHPLITK.D	HexNAc(2)Hex(8)	C[+57], N[+1703]	1241.51	3	3722.51	3722.51	0	-0.6	245	Specific	383.36	347.25	347.25	6.44	4	>sp|Q14108|SCRB2_HUMAN Lysosome membrane protein 2 OS=Homo sapiens OX=9606 GN=SCARB2 PE=1 SV=2	18342	20210911_zy_cell_ethcd_3.6556.6556.3	controllerType=0 controllerNumber=1 scan=6556	30.1314
01093:3	1	K.C[+57.021]HEGN[+1864.634]GTFEC[+57.021]GAC[+57.021]R.C	HexNAc(2)Hex(9)	C[+57]*3, N[+1865]	1173.75	3	3519.25	3519.25	0	-0.5	477	Specific	385.53	385.53	385.53	6.39	30	>sp|P05556|ITB1_HUMAN Integrin beta-1 OS=Homo sapiens OX=9606 GN=ITGB1 PE=1 SV=2	3061	20210911_zy_cell_ethcd_3.1207.1207.3	controllerType=0 controllerNumber=1 scan=1207	5.7398
00802:3	6	K.DSC[+57.021]ESNHN[+1702.581]ITC[+57.021]K.V	HexNAc(2)Hex(8)	C[+57]*2, N[+1703]	1056.39	3	3167.16	3167.17	0	-1.1	876	Specific	386.5	341.86	341.86	5.97	14	>sp|P56199|ITA1_HUMAN Integrin alpha-1 OS=Homo sapiens OX=9606 GN=ITGA1 PE=1 SV=2	9701	20210911_zy_cell_ethcd_3.887.887.3	controllerType=0 controllerNumber=1 scan=887	4.2153
02000:3	14	K.KWGHN[+1864.634]ITEFQQR.F	HexNAc(2)Hex(9)	N[+1865]	1136.81	3	3408.41	3408.41	0	-0.5	276	Specific	386.74	262.69	262.69	5.22	7	>sp|Q96HE7|ERO1A_HUMAN ERO1-like protein alpha OS=Homo sapiens OX=9606 GN=ERO1A PE=1 SV=2	2944	20210911_zy_cell_ethcd_3.2204.2204.3	controllerType=0 controllerNumber=1 scan=2204	10.3348
00979:4	33	K.YPHNHHVVN[+1864.634]NTLEGN[+1702.581]C[+57.021]SSK.S	HexNAc(2)Hex(9),HexNAc(2)Hex(8)	C[+57], N[+1703][+1865]	1444.31	4	5774.22	5774.22	0	0.7	103	Specific	391.41	391.41	115.55	6.26	7	>sp|P15586|GNS_HUMAN N-acetylglucosamine-6-sulfatase OS=Homo sapiens OX=9606 GN=GNS PE=1 SV=3	5993	20210911_zy_cell_ethcd_3.1082.1082.4	controllerType=0 controllerNumber=1 scan=1082	5.1382
01884:3	4	K.NN[+2424.867]HTASILDR.M	HexNAc(5)Hex(6)Fuc(1)NeuAc(1)	N[+2425]	1189.15	3	3565.44	3565.44	0	-1.1	129	Specific	391.5	168.79	168.79	5.64	19	>sp|P08962|CD63_HUMAN CD63 antigen OS=Homo sapiens OX=9606 GN=CD63 PE=1 SV=2	5151	20210911_zy_cell_ethcd_3.2077.2077.3	controllerType=0 controllerNumber=1 scan=2077	9.7649
01356:2	66	K.N[+1702.581]YTADYDK.A	HexNAc(2)Hex(8)	N[+1703]	1346.5	2	2692	2692	0	0	106	Specific	392.85	297.5	297.5	4.74	2	>sp|O94905|ERLN2_HUMAN Erlin-2 OS=Homo sapiens OX=9606 GN=ERLIN2 PE=1 SV=1	5719	20210911_zy_cell_ethcd_3.1497.1497.2	controllerType=0 controllerNumber=1 scan=1497	7.1073
01423:3	29	K.SQNRPQGQSTQPSNAAGTN[+406.159]TTSASTPR.S	HexNAc(2)	N[+406]	1050.82	3	3150.45	3150.45	0	-1.5	104	Specific	393.16	322.79	322.79	6.05	2	>sp|Q9UHD9|UBQL2_HUMAN Ubiquilin-2 OS=Homo sapiens OX=9606 GN=UBQLN2 PE=1 SV=2	18505	20210911_zy_cell_ethcd_3.1571.1571.3	controllerType=0 controllerNumber=1 scan=1571	7.4524
07443:3	18	R.TTLVDNNTWN[+1864.634]NSHIALVGK.A	HexNAc(2)Hex(9)	N[+1865]	1321.24	3	3961.7	3961.71	0	-0.7	618	Specific	393.73	267.88	73.35	6.1	7	>sp|Q8TCJ2|STT3B_HUMAN Dolichyl-diphosphooligosaccharide--protein glycosyltransferase subunit STT3B OS=Homo sapiens OX=9606 GN=STT3B PE=1 SV=1	13685	20210911_zy_cell_ethcd_3.8258.8258.3	controllerType=0 controllerNumber=1 scan=8258	37.7109
01708:3	55	R.FNQC[+57.021]N[+2350.830]TTR.G	HexNAc(4)Hex(5)Fuc(1)NeuAc(2)	C[+57], N[+2351]	1131.1	3	3391.29	3391.29	0	-0.5	137	Specific	394.15	128.07	128.07	4.08	4	>sp|P09923|PPBI_HUMAN Intestinal-type alkaline phosphatase OS=Homo sapiens OX=9606 GN=ALPI PE=1 SV=2	15196	20210911_zy_cell_ethcd_3.1884.1884.3	controllerType=0 controllerNumber=1 scan=1884	8.8875
01718:3	11	R.YHYN[+1702.581]GTFEDGK.K	HexNAc(2)Hex(8)	N[+1703]	1011.72	3	3033.15	3033.15	0	-1.4	67	Specific	394.41	331.42	331.42	5.97	9	>sp|Q96AY3|FKB10_HUMAN Peptidyl-prolyl cis-trans isomerase FKBP10 OS=Homo sapiens OX=9606 GN=FKBP10 PE=1 SV=1	19614	20210911_zy_cell_ethcd_3.1895.1895.3	controllerType=0 controllerNumber=1 scan=1895	8.9365
01666:3	32	K.EQYIHEN[+1864.634]YSR.A	HexNAc(2)Hex(9)	N[+1865]	1068.42	3	3203.24	3203.24	0	-1.8	542	Specific	396.85	243.62	243.62	5.63	6	>sp|O60568|PLOD3_HUMAN Multifunctional procollagen lysine hydroxylase and glycosyltransferase LH3 OS=Homo sapiens OX=9606 GN=PLOD3 PE=1 SV=1	10856	20210911_zy_cell_ethcd_3.1838.1838.3	controllerType=0 controllerNumber=1 scan=1838	8.6751
07430:3	18	R.TTLVDNNTWN[+2026.687]NSHIALVGK.A	HexNAc(2)Hex(10)	N[+2027]	1375.26	3	4123.76	4123.76	0	-0.6	618	Specific	397.06	306.39	89.82	6.15	7	>sp|Q8TCJ2|STT3B_HUMAN Dolichyl-diphosphooligosaccharide--protein glycosyltransferase subunit STT3B OS=Homo sapiens OX=9606 GN=STT3B PE=1 SV=1	13685	20210911_zy_cell_ethcd_3.8243.8243.3	controllerType=0 controllerNumber=1 scan=8243	37.644
04074:2	50	R.N[+1864.634]VSTNVFFK.Q	HexNAc(2)Hex(9)	N[+1865]	1460.6	2	2920.19	2920.19	0	-0.2	337	Specific	401.5	253.54	253.54	5.45	6	>sp|Q6YHK3|CD109_HUMAN CD109 antigen OS=Homo sapiens OX=9606 GN=CD109 PE=1 SV=2	8627	20210911_zy_cell_ethcd_3.4481.4481.3	controllerType=0 controllerNumber=1 scan=4481	20.737
03058:3	21	R.LEN[+1702.581]ITTGTYTIHAQK.E	HexNAc(2)Hex(8)	N[+1703]	1131.49	3	3392.46	3392.46	0	-1.1	367	Specific	402.17	316.42	316.42	6.03	5	>sp|Q5JPE7|NOMO2_HUMAN Nodal modulator 2 OS=Homo sapiens OX=9606 GN=NOMO2 PE=1 SV=1	6463	20210911_zy_cell_ethcd_3.3366.3366.3	controllerType=0 controllerNumber=1 scan=3366	15.625
03159:3	2	R.GHTLTLN[+1864.634]FTR.N	HexNAc(2)Hex(9)	N[+1865]	1008.76	3	3024.25	3024.26	0	-1.3	97	Specific	403.74	258.2	258.2	5.76	45	>sp|P11279|LAMP1_HUMAN Lysosome-associated membrane glycoprotein 1 OS=Homo sapiens OX=9606 GN=LAMP1 PE=1 SV=3	4405	20210911_zy_cell_ethcd_3.3477.3477.3	controllerType=0 controllerNumber=1 scan=3477	16.1449
00861:2	7	K.N[+1864.634]ATLAEQAK.L	HexNAc(2)Hex(9)	N[+1865]	1405.57	2	2810.13	2810.13	0	-0.1	869	Specific	413.8	265.99	265.99	5.45	16	>sp|Q9Y4L1|HYOU1_HUMAN Hypoxia up-regulated protein 1 OS=Homo sapiens OX=9606 GN=HYOU1 PE=1 SV=1	14756	20210911_zy_cell_ethcd_3.952.952.2	controllerType=0 controllerNumber=1 scan=952	4.5196
01734:3	11	R.YHYN[+1540.529]GTFEDGK.K	HexNAc(2)Hex(7)	N[+1541]	957.703	3	2871.1	2871.1	0	-1	67	Specific	414	269.89	269.89	5.76	9	>sp|Q96AY3|FKB10_HUMAN Peptidyl-prolyl cis-trans isomerase FKBP10 OS=Homo sapiens OX=9606 GN=FKBP10 PE=1 SV=1	19614	20210911_zy_cell_ethcd_3.1912.1912.3	controllerType=0 controllerNumber=1 scan=1912	9.0154
03916:3	25	R.N[+1864.634]HSIFLADINQER.G	HexNAc(2)Hex(9)	N[+1865]	1141.14	3	3421.41	3421.42	0	-0.3	197	Specific	414.29	288.53	288.53	5.71	4	>sp|P50897|PPT1_HUMAN Palmitoyl-protein thioesterase 1 OS=Homo sapiens OX=9606 GN=PPT1 PE=1 SV=1	7591	20210911_zy_cell_ethcd_3.4308.4308.3	controllerType=0 controllerNumber=1 scan=4308	19.94
02495:3	20	R.VTPAC[+57.021]N[+2059.735]TSLPAQR.W	HexNAc(4)Hex(5)Fuc(1)NeuAc(1)	C[+57], N[+2060]	1158.82	3	3474.44	3474.45	0	-1.8	64	Specific	414.91	183.02	183.02	4.59	12	>sp|Q9UBG0|MRC2_HUMAN C-type mannose receptor 2 OS=Homo sapiens OX=9606 GN=MRC2 PE=1 SV=2	16756	20210911_zy_cell_ethcd_3.2748.2748.3	controllerType=0 controllerNumber=1 scan=2748	12.821
02568:3	5	R.THN[+1864.634]LTDLSPHLR.Y	HexNAc(2)Hex(9)	N[+1865]	1090.13	3	3268.37	3268.37	0	-1.2	977	Specific	415.37	260	260	5.66	23	>sp|P32004|L1CAM_HUMAN Neural cell adhesion molecule L1 OS=Homo sapiens OX=9606 GN=L1CAM PE=1 SV=2	3537	20210911_zy_cell_ethcd_3.2828.2828.3	controllerType=0 controllerNumber=1 scan=2828	13.1877
02201:2	17	K.TN[+1702.581]ITLVC[+57.021]K.P	HexNAc(2)Hex(8)	C[+57], N[+1703]	1326.05	2	2651.1	2651.1	0	-0.4	580	Specific	421.46	208.02	208.02	4.71	12	>sp|P11717|MPRI_HUMAN Cation-independent mannose-6-phosphate receptor OS=Homo sapiens OX=9606 GN=IGF2R PE=1 SV=3	12317	20210911_zy_cell_ethcd_3.2425.2425.2	controllerType=0 controllerNumber=1 scan=2425	11.3318
02566:3	14	K.WGHN[+1864.634]ITEFQQR.F	HexNAc(2)Hex(9)	N[+1865]	1094.11	3	3280.31	3280.32	0	-0.8	277	Specific	422.8	285.52	285.52	5.81	7	>sp|Q96HE7|ERO1A_HUMAN ERO1-like protein alpha OS=Homo sapiens OX=9606 GN=ERO1A PE=1 SV=2	2944	20210911_zy_cell_ethcd_3.2826.2826.3	controllerType=0 controllerNumber=1 scan=2826	13.1788
02711:4	15	R.FTFTSHTPGEHQIC[+57.021]LHSN[+1540.529]STK.F	HexNAc(2)Hex(7)	C[+57], N[+1541]	993.168	4	3969.65	3969.66	0	-1.7	108	Specific	422.88	338.84	338.84	6.3	3	>sp|Q9BVK6|TMED9_HUMAN Transmembrane emp24 domain-containing protein 9 OS=Homo sapiens OX=9606 GN=TMED9 PE=1 SV=2	14554	20210911_zy_cell_ethcd_3.2985.2985.4	controllerType=0 controllerNumber=1 scan=2985	13.897
02355:3	4	K.NN[+3081.095]HTASILDR.M	HexNAc(6)Hex(7)Fuc(1)NeuAc(2)	N[+3081]	1407.89	3	4221.67	4221.67	0	-0.3	129	Specific	425.14	220.2	220.2	5.33	19	>sp|P08962|CD63_HUMAN CD63 antigen OS=Homo sapiens OX=9606 GN=CD63 PE=1 SV=2	5151	20210911_zy_cell_ethcd_3.2594.2594.3	controllerType=0 controllerNumber=1 scan=2594	12.1113
02588:3	5	R.THN[+1540.529]LTDLSPHLR.Y	HexNAc(2)Hex(7)	N[+1541]	982.092	3	2944.26	2944.27	0	-1.7	977	Specific	428.18	275.45	275.45	5.66	23	>sp|P32004|L1CAM_HUMAN Neural cell adhesion molecule L1 OS=Homo sapiens OX=9606 GN=L1CAM PE=1 SV=2	3537	20210911_zy_cell_ethcd_3.2850.2850.3	controllerType=0 controllerNumber=1 scan=2850	13.2866
05207:2	34	K.QNNGAFN[+203.079]ETLFR.N	HexNAc(1)	N[+203]	807.381	2	1613.75	1613.76	0	-0.7	721	Specific	430.31	332.46	332.46	5.19	4	>sp|P02786|TFR1_HUMAN Transferrin receptor protein 1 OS=Homo sapiens OX=9606 GN=TFRC PE=1 SV=2	16028	20210911_zy_cell_ethcd_3.5728.5728.2	controllerType=0 controllerNumber=1 scan=5728	26.4053
02902:3	1	K.LRNPC[+57.021]TSEQN[+1540.529]C[+57.021]TSPFSYK.N	HexNAc(2)Hex(7)	C[+57]*2, N[+1541]	1243.84	3	3729.5	3729.5	0	-0.3	203	Specific	430.5	335.77	335.77	5.88	30	>sp|P05556|ITB1_HUMAN Integrin beta-1 OS=Homo sapiens OX=9606 GN=ITGB1 PE=1 SV=2	3061	20210911_zy_cell_ethcd_3.3195.3195.3	controllerType=0 controllerNumber=1 scan=3195	14.8514
02851:3	1	R.NPC[+57.021]TSEQN[+1864.634]C[+57.021]TSPFSYK.N	HexNAc(2)Hex(9)	C[+57]*2, N[+1865]	1262.14	3	3784.41	3784.42	0	-3.1	205	Specific	431.53	354.49	354.49	4.75	30	>sp|P05556|ITB1_HUMAN Integrin beta-1 OS=Homo sapiens OX=9606 GN=ITGB1 PE=1 SV=2	3061	20210911_zy_cell_ethcd_3.3139.3139.3	controllerType=0 controllerNumber=1 scan=3139	14.5975
00869:3	26	R.GN[+2424.867]VTQHVQGHR.N	HexNAc(5)Hex(6)Fuc(1)NeuAc(1)	N[+2425]	1219.83	3	3657.49	3657.49	0	-1.1	76	Specific	433.88	217.36	217.36	5.54	7	>sp|Q15043|S39AE_HUMAN Zinc transporter ZIP14 OS=Homo sapiens OX=9606 GN=SLC39A14 PE=1 SV=3	16204	20210911_zy_cell_ethcd_3.960.960.3	controllerType=0 controllerNumber=1 scan=960	4.5614
02575:3	5	R.THN[+1702.581]LTDLSPHLR.Y	HexNAc(2)Hex(8)	N[+1703]	1036.11	3	3106.32	3106.32	0	-0.6	977	Specific	435.26	290.74	290.74	5.39	23	>sp|P32004|L1CAM_HUMAN Neural cell adhesion molecule L1 OS=Homo sapiens OX=9606 GN=L1CAM PE=1 SV=2	3537	20210911_zy_cell_ethcd_3.2835.2835.3	controllerType=0 controllerNumber=1 scan=2835	13.2207
01862:3	4	K.NN[+2059.735]HTASILDR.M	HexNAc(4)Hex(5)Fuc(1)NeuAc(1)	N[+2060]	1067.44	3	3200.31	3200.31	0	-1.3	129	Specific	437.11	195.63	195.63	5.77	19	>sp|P08962|CD63_HUMAN CD63 antigen OS=Homo sapiens OX=9606 GN=CD63 PE=1 SV=2	5151	20210911_zy_cell_ethcd_3.2053.2053.3	controllerType=0 controllerNumber=1 scan=2053	9.6612
01769:3	8	K.PIN[+1540.529]TTGTLKPDDR.V	HexNAc(2)Hex(7)	N[+1541]	990.096	3	2968.28	2968.28	0	-0.8	262	Specific	439.94	286.84	286.84	6.03	10	>sp|Q92542|NICA_HUMAN Nicastrin OS=Homo sapiens OX=9606 GN=NCSTN PE=1 SV=2	7240	20210911_zy_cell_ethcd_3.1951.1951.3	controllerType=0 controllerNumber=1 scan=1951	9.1894
03108:3	21	R.LEN[+1378.476]ITTGTYTIHAQK.E	HexNAc(2)Hex(6)	N[+1378]	1023.46	3	3068.35	3068.36	0	-0.9	367	Specific	440.44	311.94	311.94	6.09	5	>sp|Q5JPE7|NOMO2_HUMAN Nodal modulator 2 OS=Homo sapiens OX=9606 GN=NOMO2 PE=1 SV=1	6463	20210911_zy_cell_ethcd_3.3421.3421.3	controllerType=0 controllerNumber=1 scan=3421	15.8812
02567:3	14	K.WGHN[+1702.581]ITEFQQR.F	HexNAc(2)Hex(8)	N[+1703]	1040.09	3	3118.26	3118.26	0	-1	277	Specific	441.21	303.91	303.91	5.87	7	>sp|Q96HE7|ERO1A_HUMAN ERO1-like protein alpha OS=Homo sapiens OX=9606 GN=ERO1A PE=1 SV=2	2944	20210911_zy_cell_ethcd_3.2827.2827.3	controllerType=0 controllerNumber=1 scan=2827	13.1832
05197:2	34	K.QNNGAFN[+203.079]ETLFR.N	HexNAc(1)	N[+203]	807.38	2	1613.75	1613.76	0	-1.4	721	Specific	442.79	354.7	354.7	5.56	4	>sp|P02786|TFR1_HUMAN Transferrin receptor protein 1 OS=Homo sapiens OX=9606 GN=TFRC PE=1 SV=2	16028	20210911_zy_cell_ethcd_3.5717.5717.2	controllerType=0 controllerNumber=1 scan=5717	26.3572
04008:3	63	K.GRDIYTFDGALN[+1540.529]K.S	HexNAc(2)Hex(7)	N[+1541]	1004.09	3	3010.26	3010.27	0	-0.9	62	Specific	444.16	288.75	288.75	5.41	2	>sp|Q08722|CD47_HUMAN Leukocyte surface antigen CD47 OS=Homo sapiens OX=9606 GN=CD47 PE=1 SV=1	886	20210911_zy_cell_ethcd_3.4409.4409.3	controllerType=0 controllerNumber=1 scan=4409	20.3954
00792:3	26	R.GN[+2059.735]VTQHVQGHR.N	HexNAc(4)Hex(5)Fuc(1)NeuAc(1)	N[+2060]	1098.12	3	3292.36	3292.36	0	-0.5	76	Specific	444.56	205.48	205.48	5.29	7	>sp|Q15043|S39AE_HUMAN Zinc transporter ZIP14 OS=Homo sapiens OX=9606 GN=SLC39A14 PE=1 SV=3	16204	20210911_zy_cell_ethcd_3.876.876.3	controllerType=0 controllerNumber=1 scan=876	4.1665
02559:4	30	K.PGN[+1702.581]LSRPPPVVVPHQPR.L	HexNAc(2)Hex(8)	N[+1703]	888.159	4	3549.61	3549.62	0	-1.8	487	Specific	445.98	404.64	404.64	7.47	4	>sp|Q9BU23|LMF2_HUMAN Lipase maturation factor 2 OS=Homo sapiens OX=9606 GN=LMF2 PE=1 SV=2	7424	20210911_zy_cell_ethcd_3.2818.2818.4	controllerType=0 controllerNumber=1 scan=2818	13.1433
02791:3	3	K.VASVININPN[+1540.529]TTHSTGSC[+57.021]R.S	HexNAc(2)Hex(7)	C[+57], N[+1541]	1190.18	3	3568.52	3568.52	0	-1.3	248	Specific	447.89	348.47	348.47	6.95	21	>sp|P13473|LAMP2_HUMAN Lysosome-associated membrane glycoprotein 2 OS=Homo sapiens OX=9606 GN=LAMP2 PE=1 SV=2	6694	20210911_zy_cell_ethcd_3.3073.3073.3	controllerType=0 controllerNumber=1 scan=3073	14.2968
02587:3	5	R.THN[+1702.581]LTDLSPHLR.Y	HexNAc(2)Hex(8)	N[+1703]	1036.11	3	3106.32	3106.32	0	-1.6	977	Specific	449.3	288.96	288.96	5.77	23	>sp|P32004|L1CAM_HUMAN Neural cell adhesion molecule L1 OS=Homo sapiens OX=9606 GN=L1CAM PE=1 SV=2	3537	20210911_zy_cell_ethcd_3.2849.2849.3	controllerType=0 controllerNumber=1 scan=2849	13.2816
02858:3	1	K.LRNPC[+57.021]TSEQN[+1864.634]C[+57.021]TSPFSYK.N	HexNAc(2)Hex(9)	C[+57]*2, N[+1865]	1351.87	3	4053.61	4053.61	0	-0.4	203	Specific	453.06	391.35	391.35	6.46	30	>sp|P05556|ITB1_HUMAN Integrin beta-1 OS=Homo sapiens OX=9606 GN=ITGB1 PE=1 SV=2	3061	20210911_zy_cell_ethcd_3.3146.3146.3	controllerType=0 controllerNumber=1 scan=3146	14.6299
02221:3	6	R.SEN[+1702.581]ASLVLSSSNQK.R	HexNAc(2)Hex(8)	N[+1703]	1056.11	3	3166.31	3166.32	0	-1	1111	Specific	453.33	346.87	346.87	5.56	14	>sp|P56199|ITA1_HUMAN Integrin alpha-1 OS=Homo sapiens OX=9606 GN=ITGA1 PE=1 SV=2	9701	20210911_zy_cell_ethcd_3.2447.2447.3	controllerType=0 controllerNumber=1 scan=2447	11.4353
02882:3	1	K.LRNPC[+57.021]TSEQN[+1702.581]C[+57.021]TSPFSYK.N	HexNAc(2)Hex(8)	C[+57]*2, N[+1703]	1297.86	3	3891.55	3891.56	0	-0.6	203	Specific	453.63	367.58	367.58	6.46	30	>sp|P05556|ITB1_HUMAN Integrin beta-1 OS=Homo sapiens OX=9606 GN=ITGB1 PE=1 SV=2	3061	20210911_zy_cell_ethcd_3.3173.3173.3	controllerType=0 controllerNumber=1 scan=3173	14.7517
02863:3	1	K.LRNPC[+57.021]TSEQN[+2026.687]C[+57.021]TSPFSYK.N	HexNAc(2)Hex(10)	C[+57]*2, N[+2027]	1405.89	3	4215.66	4215.66	0	-0.2	203	Specific	459.69	382.85	382.85	6.46	30	>sp|P05556|ITB1_HUMAN Integrin beta-1 OS=Homo sapiens OX=9606 GN=ITGB1 PE=1 SV=2	3061	20210911_zy_cell_ethcd_3.3152.3152.3	controllerType=0 controllerNumber=1 scan=3152	14.6555
02884:3	8	R.N[+1864.634]ISGVVLADHSGAFHNK.Y	HexNAc(2)Hex(9)	N[+1865]	1210.85	3	3630.53	3630.53	0	-0.6	435	Specific	464.62	325.05	325.05	6.53	10	>sp|Q92542|NICA_HUMAN Nicastrin OS=Homo sapiens OX=9606 GN=NCSTN PE=1 SV=2	7240	20210911_zy_cell_ethcd_3.3175.3175.3	controllerType=0 controllerNumber=1 scan=3175	14.7612
02853:3	1	R.NPC[+57.021]TSEQN[+1702.581]C[+57.021]TSPFSYK.N	HexNAc(2)Hex(8)	C[+57]*2, N[+1703]	1208.13	3	3622.37	3622.37	0	-0.7	205	Specific	479.2	464.45	464.45	5.76	30	>sp|P05556|ITB1_HUMAN Integrin beta-1 OS=Homo sapiens OX=9606 GN=ITGB1 PE=1 SV=2	3061	20210911_zy_cell_ethcd_3.3141.3141.3	controllerType=0 controllerNumber=1 scan=3141	14.6074
02866:3	1	R.NPC[+57.021]TSEQN[+1540.529]C[+57.021]TSPFSYK.N	HexNAc(2)Hex(7)	C[+57]*2, N[+1541]	1154.11	3	3460.32	3460.32	0	-0.8	205	Specific	483.08	429.72	429.72	6.28	30	>sp|P05556|ITB1_HUMAN Integrin beta-1 OS=Homo sapiens OX=9606 GN=ITGB1 PE=1 SV=2	3061	20210911_zy_cell_ethcd_3.3155.3155.3	controllerType=0 controllerNumber=1 scan=3155	14.67
01997:3	6	R.YN[+1864.634]HTGQVIIYR.M	HexNAc(2)Hex(9)	N[+1865]	1076.79	3	3228.34	3228.35	0	-0.8	459	Specific	483.39	285.38	285.38	6.07	14	>sp|P56199|ITA1_HUMAN Integrin alpha-1 OS=Homo sapiens OX=9606 GN=ITGA1 PE=1 SV=2	9701	20210911_zy_cell_ethcd_3.2201.2201.3	controllerType=0 controllerNumber=1 scan=2201	10.3213
01667:3	32	K.EQYIHEN[+1702.581]YSR.A	HexNAc(2)Hex(8)	N[+1703]	1014.4	3	3041.19	3041.19	0	-1.1	542	Specific	487.53	327.14	327.14	6.36	6	>sp|O60568|PLOD3_HUMAN Multifunctional procollagen lysine hydroxylase and glycosyltransferase LH3 OS=Homo sapiens OX=9606 GN=PLOD3 PE=1 SV=1	10856	20210911_zy_cell_ethcd_3.1839.1839.3	controllerType=0 controllerNumber=1 scan=1839	8.6802
01934:3	13	R.EAGN[+1768.640]HTSGAGLVQINK.S	HexNAc(4)Hex(5)Fuc(1)	N[+1769]	1122.15	3	3364.45	3364.45	0	-1.1	80	Specific	490.9	334.35	299.4	6.58	10	>sp|P20645|MPRD_HUMAN Cation-dependent mannose-6-phosphate receptor OS=Homo sapiens OX=9606 GN=M6PR PE=1 SV=1	11960	20210911_zy_cell_ethcd_3.2132.2132.3	controllerType=0 controllerNumber=1 scan=2132	10.0116
04625:3	2	R.GHTLTLN[+1872.651]FTR.N	HexNAc(3)Hex(6)NeuAc(1)	N[+1873]	1011.43	3	3032.27	3032.27	0	-1.4	97	Specific	492.66	275.72	275.72	6.03	45	>sp|P11279|LAMP1_HUMAN Lysosome-associated membrane glycoprotein 1 OS=Homo sapiens OX=9606 GN=LAMP1 PE=1 SV=3	4405	20210911_zy_cell_ethcd_3.5089.5089.3	controllerType=0 controllerNumber=1 scan=5089	23.5083
03188:3	2	R.GHTLTLN[+1540.529]FTR.N	HexNAc(2)Hex(7)	N[+1541]	900.721	3	2700.15	2700.15	0	-0.5	97	Specific	501.45	358.31	358.31	6.05	45	>sp|P11279|LAMP1_HUMAN Lysosome-associated membrane glycoprotein 1 OS=Homo sapiens OX=9606 GN=LAMP1 PE=1 SV=3	4405	20210911_zy_cell_ethcd_3.3509.3509.3	controllerType=0 controllerNumber=1 scan=3509	16.2923
03130:3	13	R.EAGN[+2350.830]HTSGAGLVQINK.S	HexNAc(4)Hex(5)Fuc(1)NeuAc(2)	N[+2351]	1316.22	3	3946.64	3946.64	0	-0.1	80	Specific	502.26	357.47	357.47	6.27	10	>sp|P20645|MPRD_HUMAN Cation-dependent mannose-6-phosphate receptor OS=Homo sapiens OX=9606 GN=M6PR PE=1 SV=1	11960	20210911_zy_cell_ethcd_3.3445.3445.3	controllerType=0 controllerNumber=1 scan=3445	15.9979
03895:3	25	R.N[+2026.687]HSIFLADINQER.G	HexNAc(2)Hex(10)	N[+2027]	1195.16	3	3583.47	3583.47	0	-1	197	Specific	502.95	378.11	378.11	7.1	4	>sp|P50897|PPT1_HUMAN Palmitoyl-protein thioesterase 1 OS=Homo sapiens OX=9606 GN=PPT1 PE=1 SV=1	7591	20210911_zy_cell_ethcd_3.4285.4285.3	controllerType=0 controllerNumber=1 scan=4285	19.8343
02211:3	6	R.SEN[+1864.634]ASLVLSSSNQK.R	HexNAc(2)Hex(9)	N[+1865]	1110.13	3	3328.36	3328.37	0	-1.4	1111	Specific	508.53	385.32	385.32	6.28	14	>sp|P56199|ITA1_HUMAN Integrin alpha-1 OS=Homo sapiens OX=9606 GN=ITGA1 PE=1 SV=2	9701	20210911_zy_cell_ethcd_3.2436.2436.3	controllerType=0 controllerNumber=1 scan=2436	11.3857
02446:3	67	K.DGSDEPGTAAC[+57.021]PN[+1378.476]GSFHC[+57.021]TNTGYK.P	HexNAc(2)Hex(6)	C[+57]*2, N[+1378]	1307.84	3	3921.49	3921.5	0	-1.1	60	Specific	511.62	508.43	508.43	7.19	1	>sp|P14314|GLU2B_HUMAN Glucosidase 2 subunit beta OS=Homo sapiens OX=9606 GN=PRKCSH PE=1 SV=2	3879	20210911_zy_cell_ethcd_3.2694.2694.3	controllerType=0 controllerNumber=1 scan=2694	12.5723
02445:3	79	R.GYYN[+2350.830]QSEAGSHTLQR.M	HexNAc(4)Hex(5)Fuc(1)NeuAc(2)	N[+2351]	1354.54	3	4061.61	4061.61	0	-0.4	107	Specific	512.5	101.81	101.81	5.78	1	>sp|Q29836|1B67_HUMAN HLA class I histocompatibility antigen, B-67 alpha chain OS=Homo sapiens OX=9606 GN=HLA-B PE=1 SV=1	223	20210911_zy_cell_ethcd_3.2693.2693.3	controllerType=0 controllerNumber=1 scan=2693	12.5673
00972:4	33	K.YPHNHHVVN[+1864.634]NTLEGN[+1540.529]C[+57.021]SSK.S	HexNAc(2)Hex(9),HexNAc(2)Hex(7)	C[+57], N[+1541][+1865]	1403.8	4	5612.17	5612.17	0	0.7	103	Specific	516.34	412.4	139.73	6.66	7	>sp|P15586|GNS_HUMAN N-acetylglucosamine-6-sulfatase OS=Homo sapiens OX=9606 GN=GNS PE=1 SV=3	5993	20210911_zy_cell_ethcd_3.1074.1074.4	controllerType=0 controllerNumber=1 scan=1074	5.1032
02811:3	3	K.VASVININPN[+1581.555]TTHSTGSC[+57.021]R.S	HexNAc(3)Hex(6)	C[+57], N[+1582]	1203.85	3	3609.55	3609.55	0	-0.7	248	Specific	530.38	411.63	411.63	7.55	21	>sp|P13473|LAMP2_HUMAN Lysosome-associated membrane glycoprotein 2 OS=Homo sapiens OX=9606 GN=LAMP2 PE=1 SV=2	6694	20210911_zy_cell_ethcd_3.3095.3095.3	controllerType=0 controllerNumber=1 scan=3095	14.398
03138:3	13	R.EAGN[+2350.830]HTSGAGLVQINK.S	HexNAc(4)Hex(5)Fuc(1)NeuAc(2)	N[+2351]	1316.22	3	3946.64	3946.64	0	-0.2	80	Specific	530.98	387.54	387.54	6.66	10	>sp|P20645|MPRD_HUMAN Cation-dependent mannose-6-phosphate receptor OS=Homo sapiens OX=9606 GN=M6PR PE=1 SV=1	11960	20210911_zy_cell_ethcd_3.3454.3454.3	controllerType=0 controllerNumber=1 scan=3454	16.0385
02810:3	3	K.VASVININPN[+1378.476]TTHSTGSC[+57.021]R.S	HexNAc(2)Hex(6)	C[+57], N[+1378]	1136.16	3	3406.46	3406.47	0	-1	248	Specific	534.31	423.67	423.67	7.55	21	>sp|P13473|LAMP2_HUMAN Lysosome-associated membrane glycoprotein 2 OS=Homo sapiens OX=9606 GN=LAMP2 PE=1 SV=2	6694	20210911_zy_cell_ethcd_3.3094.3094.3	controllerType=0 controllerNumber=1 scan=3094	14.3927
04718:3	23	R.TILVDNNTWN[+1702.581]NTHISR.V	HexNAc(2)Hex(8)	N[+1703]	1200.85	3	3600.53	3600.53	0	-1.4	539	Specific	555.33	418.14	92.76	6.98	3	>sp|P46977|STT3A_HUMAN Dolichyl-diphosphooligosaccharide--protein glycosyltransferase subunit STT3A OS=Homo sapiens OX=9606 GN=STT3A PE=1 SV=2	18762	20210911_zy_cell_ethcd_3.5191.5191.3	controllerType=0 controllerNumber=1 scan=5191	23.973
03201:4	10	R.IAPASN[+1864.634]VSHTVVLRPLK.A	HexNAc(2)Hex(9)	N[+1865]	917.429	4	3666.7	3666.7	0	-0.9	83	Specific	558.13	501.11	501.11	6.89	7	>sp|P43308|SSRB_HUMAN Translocon-associated protein subunit beta OS=Homo sapiens OX=9606 GN=SSR2 PE=1 SV=1	13071	20210911_zy_cell_ethcd_3.3523.3523.4	controllerType=0 controllerNumber=1 scan=3523	16.3575
02862:3	3	K.VASVININPN[+1565.560]TTHSTGSC[+57.021]R.S	HexNAc(3)Hex(5)Fuc(1)	C[+57], N[+1566]	1198.52	3	3593.55	3593.55	0	-1.2	248	Specific	568.19	427.54	427.54	8.16	21	>sp|P13473|LAMP2_HUMAN Lysosome-associated membrane glycoprotein 2 OS=Homo sapiens OX=9606 GN=LAMP2 PE=1 SV=2	6694	20210911_zy_cell_ethcd_3.3151.3151.3	controllerType=0 controllerNumber=1 scan=3151	14.6503
02883:3	8	R.N[+1702.581]ISGVVLADHSGAFHNK.Y	HexNAc(2)Hex(8)	N[+1703]	1156.83	3	3468.48	3468.48	0	-1.2	435	Specific	574.42	428.21	428.21	8.06	10	>sp|Q92542|NICA_HUMAN Nicastrin OS=Homo sapiens OX=9606 GN=NCSTN PE=1 SV=2	7240	20210911_zy_cell_ethcd_3.3174.3174.3	controllerType=0 controllerNumber=1 scan=3174	14.7567
04708:3	23	R.TILVDNNTWN[+1864.634]NTHISR.V	HexNAc(2)Hex(9)	N[+1865]	1254.87	3	3762.59	3762.59	0	0	539	Specific	576.92	427.29	90.8	7.28	3	>sp|P46977|STT3A_HUMAN Dolichyl-diphosphooligosaccharide--protein glycosyltransferase subunit STT3A OS=Homo sapiens OX=9606 GN=STT3A PE=1 SV=2	18762	20210911_zy_cell_ethcd_3.5180.5180.3	controllerType=0 controllerNumber=1 scan=5180	23.9229
02572:4	30	K.PGN[+1702.581]LSRPPPVVVPHQPR.L	HexNAc(2)Hex(8)	N[+1703]	888.16	4	3549.62	3549.62	0	-0.8	487	Specific	596.01	549.8	549.8	8.16	4	>sp|Q9BU23|LMF2_HUMAN Lipase maturation factor 2 OS=Homo sapiens OX=9606 GN=LMF2 PE=1 SV=2	7424	20210911_zy_cell_ethcd_3.2832.2832.4	controllerType=0 controllerNumber=1 scan=2832	13.2066
02830:3	1	R.NPC[+57.021]TSEQN[+2026.687]C[+57.021]TSPFSYK.N	HexNAc(2)Hex(10)	C[+57]*2, N[+2027]	1316.16	3	3946.47	3946.48	0	-1	205	Specific	596.33	541.79	541.79	6.77	30	>sp|P05556|ITB1_HUMAN Integrin beta-1 OS=Homo sapiens OX=9606 GN=ITGB1 PE=1 SV=2	3061	20210911_zy_cell_ethcd_3.3116.3116.3	controllerType=0 controllerNumber=1 scan=3116	14.4955
03208:4	10	R.IAPASN[+1864.634]VSHTVVLRPLK.A	HexNAc(2)Hex(9)	N[+1865]	917.429	4	3666.69	3666.7	0	-1.1	83	Specific	629.53	548.6	548.6	9.16	7	>sp|P43308|SSRB_HUMAN Translocon-associated protein subunit beta OS=Homo sapiens OX=9606 GN=SSR2 PE=1 SV=1	13071	20210911_zy_cell_ethcd_3.3531.3531.4	controllerType=0 controllerNumber=1 scan=3531	16.3932
03270:3	41	K.GQTEIQVNC[+57.021]PPAVTEN[+1540.529]K.T	HexNAc(2)Hex(7)	C[+57], N[+1541]	1142.48	3	3425.44	3425.44	0	-0.6	56	Specific	641.53	496.7	496.7	8.02	3	>sp|Q16563|SYPL1_HUMAN Synaptophysin-like protein 1 OS=Homo sapiens OX=9606 GN=SYPL1 PE=1 SV=1	16250	20210911_zy_cell_ethcd_3.3599.3599.3	controllerType=0 controllerNumber=1 scan=3599	16.6991
02700:4	15	R.FTFTSHTPGEHQIC[+57.021]LHSN[+1540.529]STK.F	HexNAc(2)Hex(7)	C[+57], N[+1541]	993.17	4	3969.66	3969.66	0	-0.6	108	Specific	658.57	564.72	564.72	9.26	3	>sp|Q9BVK6|TMED9_HUMAN Transmembrane emp24 domain-containing protein 9 OS=Homo sapiens OX=9606 GN=TMED9 PE=1 SV=2	14554	20210911_zy_cell_ethcd_3.2973.2973.4	controllerType=0 controllerNumber=1 scan=2973	13.8386
00862:2	7	K.N[+1702.581]ATLAEQAK.L	HexNAc(2)Hex(8)	N[+1703]	1324.54	2	2648.08	2648.08	0	-0.3	869	Specific	664.15	423.77	423.77	9.06	16	>sp|Q9Y4L1|HYOU1_HUMAN Hypoxia up-regulated protein 1 OS=Homo sapiens OX=9606 GN=HYOU1 PE=1 SV=1	14756	20210911_zy_cell_ethcd_3.953.953.2	controllerType=0 controllerNumber=1 scan=953	4.5251
01432:3	29	K.SQNRPQGQSTQPSNAAGTN[+203.079]TTSASTPR.S	HexNAc(1)	N[+203]	983.129	3	2947.37	2947.37	0	-0.7	104	Specific	725.51	673.54	673.54	10.27	2	>sp|Q9UHD9|UBQL2_HUMAN Ubiquilin-2 OS=Homo sapiens OX=9606 GN=UBQLN2 PE=1 SV=2	18505	20210911_zy_cell_ethcd_3.1581.1581.3	controllerType=0 controllerNumber=1 scan=1581	7.5002
02721:4	15	R.FTFTSHTPGEHQIC[+57.021]LHSN[+1378.476]STK.F	HexNAc(2)Hex(6)	C[+57], N[+1378]	952.655	4	3807.6	3807.61	0	-1.9	108	Specific	768.57	687.01	687.01	10.97	3	>sp|Q9BVK6|TMED9_HUMAN Transmembrane emp24 domain-containing protein 9 OS=Homo sapiens OX=9606 GN=TMED9 PE=1 SV=2	14554	20210911_zy_cell_ethcd_3.2996.2996.4	controllerType=0 controllerNumber=1 scan=2996	13.9455

## Sheet: sceHCD-R1
Query #:z	Protein Rank	Peptide < ProteinMetrics Confidential >	Glycans NHFAGNa	Modification Type(s)	Observed m/z	z	Observed (M+H)	Calc. mass (M+H)	Off-by-x error	Mass error (ppm)	Starting position	Cleavage	Score	Delta	Delta Mod	|Log Prob|	# of unique peptides	Protein Name	Protein DB number	Comment	Scan #	Scan Time
00177:3	103	K.KKEDALN[+1864.634]ETR.E	HexNAc(2)Hex(9)	N[+1865]	1023.42	3	3068.26	3068.27	0	-2.1	80	Specific	200.56	200.56	200.56	3.21	5	>sp|P10909|CLUS_HUMAN Clusterin OS=Homo sapiens OX=9606 GN=CLU PE=1 SV=1	6125	20210911_zy_cell_scehcd_1.195.195.3	controllerType=0 controllerNumber=1 scan=195	0.8414
03065:3	6	K.PIN[+1825.661]TTGTLKPDDR.V	HexNAc(5)Hex(5)	N[+1826]	1085.14	3	3253.4	3253.41	0	-1.7	262	Specific	201.16	97.08	97.08	3.98	14	>sp|Q92542|NICA_HUMAN Nicastrin OS=Homo sapiens OX=9606 GN=NCSTN PE=1 SV=2	7240	20210911_zy_cell_scehcd_1.3344.3344.3	controllerType=0 controllerNumber=1 scan=3344	14.5232
02427:3	2	R.LLNINPN[+2352.846]K.T	HexNAc(6)Hex(7)	N[+2353]	1093.47	3	3278.39	3278.39	0	-1.5	255	Specific	201.87	172.21	172.21	3.71	55	>sp|P11279|LAMP1_HUMAN Lysosome-associated membrane glycoprotein 1 OS=Homo sapiens OX=9606 GN=LAMP1 PE=1 SV=3	4405	20210911_zy_cell_scehcd_1.2648.2648.3	controllerType=0 controllerNumber=1 scan=2648	11.4837
09211:3	81	K.HLN[+1702.581]ASNPTEPATIIFTAAR.E	HexNAc(2)Hex(8)	N[+1703]	1242.88	3	3726.64	3726.64	0	0.4	284	Specific	201.97	201.97	201.97	4.26	2	>sp|Q8NFQ8|TOIP2_HUMAN Torsin-1A-interacting protein 2 OS=Homo sapiens OX=9606 GN=TOR1AIP2 PE=1 SV=1	14511	20210911_zy_cell_scehcd_1.10082.10082.3	controllerType=0 controllerNumber=1 scan=10082	43.6266
06370:3	33	R.SAN[+1540.529]STLAQALHWTR.S	HexNAc(2)Hex(7)	N[+1541]	1032.78	3	3096.32	3096.33	0	-1.8	614	Specific	202.63	202.63	202.63	4.22	4	>sp|Q9BU23|LMF2_HUMAN Lipase maturation factor 2 OS=Homo sapiens OX=9606 GN=LMF2 PE=1 SV=2	7424	20210911_zy_cell_scehcd_1.6950.6950.3	controllerType=0 controllerNumber=1 scan=6950	30.1512
03315:2	176	R.TVPPMVN[+1702.581]VTR.S	HexNAc(2)Hex(8)	N[+1703]	1408.6	2	2816.18	2816.19	0	-2.3	204	Specific	202.65	52.22	52.22	3.19	1	>sp|Q29983|MICA_HUMAN MHC class I polypeptide-related sequence A OS=Homo sapiens OX=9606 GN=MICA PE=1 SV=1	7436	20210911_zy_cell_scehcd_1.3617.3617.2	controllerType=0 controllerNumber=1 scan=3617	15.7026
04590:2	111	K.SYAGFLTVN[+1540.529]K.T	HexNAc(2)Hex(7)	N[+1541]	1320.55	2	2640.1	2640.11	0	-1.8	73	Specific	203.12	143.43	143.43	4.26	4	>sp|Q9H3G5|CPVL_HUMAN Probable serine carboxypeptidase CPVL OS=Homo sapiens OX=9606 GN=CPVL PE=1 SV=2	298	20210911_zy_cell_scehcd_1.5008.5008.2	controllerType=0 controllerNumber=1 scan=5008	21.7376
06386:3	124	K.HN[+2026.687]ISHMSMDIAR.G	HexNAc(2)Hex(10)	N[+2027]	1146.79	3	3438.34	3438.34	0	-0.6	367	Specific	203.13	15.05	15.05	2.23	6	>sp|Q8IWB7|WDFY1_HUMAN WD repeat and FYVE domain-containing protein 1 OS=Homo sapiens OX=9606 GN=WDFY1 PE=1 SV=1	17515	20210911_zy_cell_scehcd_1.6968.6968.3	controllerType=0 controllerNumber=1 scan=6968	30.2274
05958:3	154	K.TSGN[+1864.634]FTIDPDGSGPLK.P	HexNAc(2)Hex(9)	N[+1865]	1157.47	3	3470.4	3470.41	0	-2.1	594	Specific	203.27	203.27	203.27	4.32	2	>sp|P78357|CNTP1_HUMAN Contactin-associated protein 1 OS=Homo sapiens OX=9606 GN=CNTNAP1 PE=1 SV=1	341	20210911_zy_cell_scehcd_1.6500.6500.3	controllerType=0 controllerNumber=1 scan=6500	28.2037
11505:3	7	R.N[+1872.651]GSSIVDLSPLIHR.T	HexNAc(3)Hex(6)NeuAc(1)	N[+1873]	1127.49	3	3380.47	3380.47	0	-1.8	1656	Specific	203.75	86.39	86.39	3.98	21	>sp|P11717|MPRI_HUMAN Cation-independent mannose-6-phosphate receptor OS=Homo sapiens OX=9606 GN=IGF2R PE=1 SV=3	12317	20210911_zy_cell_scehcd_1.12777.12777.3	controllerType=0 controllerNumber=1 scan=12777	54.7259
03457:3	14	R.IAPASN[+1864.634]VSHTVVLRPLK.A	HexNAc(2)Hex(9)	N[+1865]	1222.9	3	3666.69	3666.7	0	-1.5	83	Specific	204	204	204	3.7	7	>sp|P43308|SSRB_HUMAN Translocon-associated protein subunit beta OS=Homo sapiens OX=9606 GN=SSR2 PE=1 SV=1	13071	20210911_zy_cell_scehcd_1.3772.3772.3	controllerType=0 controllerNumber=1 scan=3772	16.3761
13724:3	2	K.EN[+2715.963]TSDPSLVIAFGR.G	HexNAc(5)Hex(6)Fuc(1)NeuAc(2)	N[+2716]	1407.92	3	4221.73	4221.72	0	2.1	83	Specific	204.29	98.03	98.03	1.61	55	>sp|P11279|LAMP1_HUMAN Lysosome-associated membrane glycoprotein 1 OS=Homo sapiens OX=9606 GN=LAMP1 PE=1 SV=3	4405	20210911_zy_cell_scehcd_1.15925.15925.3	controllerType=0 controllerNumber=1 scan=15925	66.7087
01956:3	272	R.RDPGAAVPGAAN[+1864.634]ASAQQPR.T	HexNAc(2)Hex(9)	N[+1865]	1233.52	3	3698.56	3698.57	0	-2.4	70	Specific	204.64	57.11	57.11	0.72	1	>sp|P28300|LYOX_HUMAN Protein-lysine 6-oxidase OS=Homo sapiens OX=9606 GN=LOX PE=1 SV=2	14601	20210911_zy_cell_scehcd_1.2135.2135.3	controllerType=0 controllerNumber=1 scan=2135	9.2516
02238:3	58	R.FNQC[+57.021]N[+3372.190]TTR.G	HexNAc(6)Hex(7)Fuc(1)NeuAc(3)	C[+57], N[+3372]	1471.22	3	4411.65	4412.65	-1	2.2	137	Specific	204.73	4.37	4.37	0.07	8	>sp|P09923|PPBI_HUMAN Intestinal-type alkaline phosphatase OS=Homo sapiens OX=9606 GN=ALPI PE=1 SV=2	15196	20210911_zy_cell_scehcd_1.2442.2442.3	controllerType=0 controllerNumber=1 scan=2442	10.5854
06762:3	73	R.DELADEIAN[+2204.772]SSGK.G	HexNAc(4)Hex(5)NeuAc(2)	N[+2205]	1185.13	3	3553.38	3553.4	0	-4.1	1704	Specific	204.79	100.48	100.48	2.26	3	>sp|P35579|MYH9_HUMAN Myosin-9 OS=Homo sapiens OX=9606 GN=MYH9 PE=1 SV=4	12366	20210911_zy_cell_scehcd_1.7379.7379.3	controllerType=0 controllerNumber=1 scan=7379	32.0051
03056:2	139	K.SN[+2059.735]LTVLR.E	HexNAc(4)Hex(5)Fuc(1)NeuAc(1)	N[+2060]	1431.61	2	2862.21	2862.21	0	-1	704	Specific	204.95	0	0	1.91	5	>sp|P18084|ITB5_HUMAN Integrin beta-5 OS=Homo sapiens OX=9606 GN=ITGB5 PE=1 SV=1	11995	20210911_zy_cell_scehcd_1.3335.3335.2	controllerType=0 controllerNumber=1 scan=3335	14.4813
03056:2	142	K.SN[+2059.735]ISILR.V	HexNAc(4)Hex(5)Fuc(1)NeuAc(1)	N[+2060]	1431.61	2	2862.21	2862.21	0	-1	691	Specific	204.95	0	0	1.91	7	>sp|P19022|CADH2_HUMAN Cadherin-2 OS=Homo sapiens OX=9606 GN=CDH2 PE=1 SV=4	1389	20210911_zy_cell_scehcd_1.3335.3335.2	controllerType=0 controllerNumber=1 scan=3335	14.4813
03300:3	41	R.VTPAC[+57.021]N[+2715.963]TSLPAQR.W	HexNAc(5)Hex(6)Fuc(1)NeuAc(2)	C[+57], N[+2716]	1377.56	3	4130.67	4130.67	0	-0.7	64	Specific	204.98	51.4	51.4	2.6	11	>sp|Q9UBG0|MRC2_HUMAN C-type mannose receptor 2 OS=Homo sapiens OX=9606 GN=MRC2 PE=1 SV=2	16756	20210911_zy_cell_scehcd_1.3601.3601.3	controllerType=0 controllerNumber=1 scan=3601	15.6314
06289:3	124	K.HN[+1540.529]ISHMSMDIAR.G	HexNAc(2)Hex(7)	N[+1541]	984.734	3	2952.19	2952.19	0	0.7	367	Specific	205.55	6.53	6.53	0.68	6	>sp|Q8IWB7|WDFY1_HUMAN WD repeat and FYVE domain-containing protein 1 OS=Homo sapiens OX=9606 GN=WDFY1 PE=1 SV=1	17515	20210911_zy_cell_scehcd_1.6862.6862.3	controllerType=0 controllerNumber=1 scan=6862	29.7689
01509:2	3	K.VPGN[+1540.529]QTSTTLK.L	HexNAc(2)Hex(7)	N[+1541]	1343.57	2	2686.14	2686.14	0	-1	668	Specific	205.84	93.09	93.09	3.85	29	>sp|P32004|L1CAM_HUMAN Neural cell adhesion molecule L1 OS=Homo sapiens OX=9606 GN=L1CAM PE=1 SV=2	3537	20210911_zy_cell_scehcd_1.1647.1647.2	controllerType=0 controllerNumber=1 scan=1647	7.1307
12811:3	120	K.N[+2350.830]LTVC[+57.021]PDGALFEQK.G	HexNAc(4)Hex(5)Fuc(1)NeuAc(2)	C[+57], N[+2351]	1314.87	3	3942.61	3942.61	0	-0.6	124	Specific	206.01	100.56	100.56	3.21	5	>sp|P54709|AT1B3_HUMAN Sodium/potassium-transporting ATPase subunit beta-3 OS=Homo sapiens OX=9606 GN=ATP1B3 PE=1 SV=1	20415	20210911_zy_cell_scehcd_1.14645.14645.3	controllerType=0 controllerNumber=1 scan=14645	61.8473
00920:3	22	K.ENQN[+1702.581]HSYSLK.S	HexNAc(2)Hex(8)	N[+1703]	974.72	3	2922.15	2922.15	0	-1.7	942	Specific	206.07	76.56	76.56	3.46	12	>sp|P06756|ITAV_HUMAN Integrin alpha-V OS=Homo sapiens OX=9606 GN=ITGAV PE=1 SV=2	6597	20210911_zy_cell_scehcd_1.1005.1005.3	controllerType=0 controllerNumber=1 scan=1005	4.3366
04273:3	69	K.GRDIYTFDGALN[+1581.555]K.S	HexNAc(3)Hex(6)	N[+1582]	1017.77	3	3051.29	3051.29	0	-2.5	62	Specific	206.35	83.61	83.61	2.59	4	>sp|Q08722|CD47_HUMAN Leukocyte surface antigen CD47 OS=Homo sapiens OX=9606 GN=CD47 PE=1 SV=1	886	20210911_zy_cell_scehcd_1.4662.4662.3	controllerType=0 controllerNumber=1 scan=4662	20.2385
01896:3	119	R.DHLLLPATTHN[+2026.687]K.T	HexNAc(2)Hex(10)	N[+2027]	1129.48	3	3386.42	3386.42	0	-2.2	574	Specific	207.02	68.36	68.36	3.22	2	>sp|P18850|ATF6A_HUMAN Cyclic AMP-dependent transcription factor ATF-6 alpha OS=Homo sapiens OX=9606 GN=ATF6 PE=1 SV=3	8765	20210911_zy_cell_scehcd_1.2069.2069.3	controllerType=0 controllerNumber=1 scan=2069	8.9664
00463:2	2	K.AAN[+2350.793]GSLR.A	HexNAc(2)Hex(12)	N[+2351]	1520.08	2	3039.16	3039.17	0	-1.7	320	Specific	207.06	21.61	21.61	1.91	55	>sp|P11279|LAMP1_HUMAN Lysosome-associated membrane glycoprotein 1 OS=Homo sapiens OX=9606 GN=LAMP1 PE=1 SV=3	4405	20210911_zy_cell_scehcd_1.507.507.2	controllerType=0 controllerNumber=1 scan=507	2.1953
03304:3	36	R.M[+15.995]N[+3007.058]ITVK.N	HexNAc(5)Hex(6)Fuc(1)NeuAc(3)	M[+16], N[+3007]	1243.49	3	3728.44	3728.45	0	-2.1	106	Specific	207.68	20.79	20.79	0.6	12	>sp|P26006|ITA3_HUMAN Integrin alpha-3 OS=Homo sapiens OX=9606 GN=ITGA3 PE=1 SV=5	6507	20210911_zy_cell_scehcd_1.3605.3605.3	controllerType=0 controllerNumber=1 scan=3605	15.6503
02089:2	16	R.VN[+1378.476]NTLSSQISR.L	HexNAc(2)Hex(6)	N[+1378]	1299.06	2	2597.12	2597.12	0	-1.4	1106	Specific	207.94	85.55	85.55	3.24	15	>sp|P11047|LAMC1_HUMAN Laminin subunit gamma-1 OS=Homo sapiens OX=9606 GN=LAMC1 PE=1 SV=3	4746	20210911_zy_cell_scehcd_1.2280.2280.2	controllerType=0 controllerNumber=1 scan=2280	9.8814
12881:3	246	R.C[+57.021]VASVPSIPGLN[+2204.772]R.T	HexNAc(4)Hex(5)NeuAc(2)	C[+57], N[+2205]	1192.17	3	3574.49	3574.5	0	-2	407	Specific	208.11	140.13	140.13	0.94	1	>sp|P43121|MUC18_HUMAN Cell surface glycoprotein MUC18 OS=Homo sapiens OX=9606 GN=MCAM PE=1 SV=2	9560	20210911_zy_cell_scehcd_1.14742.14742.3	controllerType=0 controllerNumber=1 scan=14742	62.2112
02098:3	26	K.HTNMN[+1540.529]LTQLK.V	HexNAc(2)Hex(7)	N[+1541]	914.053	3	2740.15	2740.15	0	-1	250	Specific	208.71	90.65	90.65	2.87	11	>sp|Q15165|PON2_HUMAN Serum paraoxonase/arylesterase 2 OS=Homo sapiens OX=9606 GN=PON2 PE=1 SV=4	9244	20210911_zy_cell_scehcd_1.2290.2290.3	controllerType=0 controllerNumber=1 scan=2290	9.9231
01764:3	235	R.N[+1864.634]ISGHIYNQN[+1216.423]VSQK.D	HexNAc(2)Hex(9),HexNAc(2)Hex(5)	N[+1216][+1865]	1561.62	3	4682.86	4682.86	0	-0.7	38	Specific	209.19	141.2	1.2	1.53	1	>sp|Q9P0T7|TMEM9_HUMAN Transmembrane protein 9 OS=Homo sapiens OX=9606 GN=TMEM9 PE=1 SV=1	14390	20210911_zy_cell_scehcd_1.1925.1925.3	controllerType=0 controllerNumber=1 scan=1925	8.3426
01134:2	3	R.DLQAN[+1378.476]DTGR.Y	HexNAc(2)Hex(6)	N[+1378]	1184.47	2	2367.94	2367.94	0	-0.8	486	Specific	209.44	28.99	28.99	3.19	29	>sp|P32004|L1CAM_HUMAN Neural cell adhesion molecule L1 OS=Homo sapiens OX=9606 GN=L1CAM PE=1 SV=2	3537	20210911_zy_cell_scehcd_1.1238.1238.2	controllerType=0 controllerNumber=1 scan=1238	5.3521
03542:2	139	K.SN[+1872.651]LTVLR.E	HexNAc(3)Hex(6)NeuAc(1)	N[+1873]	1338.07	2	2675.13	2675.13	0	-0.7	704	Specific	210.55	0.4	0.4	1.47	5	>sp|P18084|ITB5_HUMAN Integrin beta-5 OS=Homo sapiens OX=9606 GN=ITGB5 PE=1 SV=1	11995	20210911_zy_cell_scehcd_1.3865.3865.2	controllerType=0 controllerNumber=1 scan=3865	16.7792
02901:3	1	K.VASVININPN[+2133.772]TTHSTGSC[+57.021]R.S	HexNAc(5)Hex(6)Fuc(1)	C[+57], N[+2134]	1387.92	3	4161.75	4161.76	0	-4.4	248	Specific	210.55	125.2	125.2	3.33	36	>sp|P13473|LAMP2_HUMAN Lysosome-associated membrane glycoprotein 2 OS=Homo sapiens OX=9606 GN=LAMP2 PE=1 SV=2	6694	20210911_zy_cell_scehcd_1.3166.3166.3	controllerType=0 controllerNumber=1 scan=3166	13.7441
00979:2	268	R.LVYN[+1864.634]K.T	HexNAc(2)Hex(9)	N[+1865]	1251.01	2	2501	2501.01	0	-1	96	Specific	210.96	163.21	163.21	0.82	1	>sp|Q8NCC3|PAG15_HUMAN Group XV phospholipase A2 OS=Homo sapiens OX=9606 GN=PLA2G15 PE=1 SV=2	13004	20210911_zy_cell_scehcd_1.1069.1069.2	controllerType=0 controllerNumber=1 scan=1069	4.6168
05439:3	4	K.LRNPC[+57.021]TSEQN[+2204.772]C[+57.021]TSPFSYK.N	HexNAc(4)Hex(5)NeuAc(2)	C[+57]*2, N[+2205]	1465.25	3	4393.74	4393.75	0	-2.1	203	Specific	211.44	80.06	80.06	3.35	27	>sp|P05556|ITB1_HUMAN Integrin beta-1 OS=Homo sapiens OX=9606 GN=ITGB1 PE=1 SV=2	3061	20210911_zy_cell_scehcd_1.5934.5934.3	controllerType=0 controllerNumber=1 scan=5934	25.7506
01103:2	129	R.AFM[+15.995]N[+2059.735]R.T	HexNAc(4)Hex(5)Fuc(1)NeuAc(1)	M[+16], N[+2060]	1357.52	2	2714.04	2714.04	0	-0.7	170	Specific	211.59	19.84	19.84	1.47	7	>sp|Q8WTV0|SCRB1_HUMAN Scavenger receptor class B member 1 OS=Homo sapiens OX=9606 GN=SCARB1 PE=1 SV=1	16447	20210911_zy_cell_scehcd_1.1204.1204.2	controllerType=0 controllerNumber=1 scan=1204	5.2041
02065:2	16	R.VN[+1702.581]NTLSSQISR.L	HexNAc(2)Hex(8)	N[+1703]	1461.11	2	2921.22	2921.22	0	-1	1106	Specific	211.63	97.27	97.27	4.25	15	>sp|P11047|LAMC1_HUMAN Laminin subunit gamma-1 OS=Homo sapiens OX=9606 GN=LAMC1 PE=1 SV=3	4746	20210911_zy_cell_scehcd_1.2254.2254.2	controllerType=0 controllerNumber=1 scan=2254	9.7695
08073:3	58	K.HQGAWYVWN[+2204.772]R.T	HexNAc(4)Hex(5)NeuAc(2)	N[+2205]	1174.47	3	3521.4	3521.4	0	-1	260	Specific	212	88.3	88.3	3.85	8	>sp|P09923|PPBI_HUMAN Intestinal-type alkaline phosphatase OS=Homo sapiens OX=9606 GN=ALPI PE=1 SV=2	15196	20210911_zy_cell_scehcd_1.8816.8816.3	controllerType=0 controllerNumber=1 scan=8816	38.222
04212:3	36	K.N[+1872.651]ITIVTGAPR.H	HexNAc(3)Hex(6)NeuAc(1)	N[+1873]	972.088	3	2914.25	2914.26	0	-1.6	265	Specific	212.07	85.75	85.75	3.49	12	>sp|P26006|ITA3_HUMAN Integrin alpha-3 OS=Homo sapiens OX=9606 GN=ITGA3 PE=1 SV=5	6507	20210911_zy_cell_scehcd_1.4596.4596.3	controllerType=0 controllerNumber=1 scan=4596	19.952
14086:3	108	K.AFN[+2861.000]STLPTMAQMEK.A	HexNAc(5)Hex(6)NeuAc(3)	N[+2861]	1477.25	3	4429.74	4429.74	0	-0.2	55	Specific	212.13	101.13	101.13	2.72	10	>sp|P16070|CD44_HUMAN CD44 antigen OS=Homo sapiens OX=9606 GN=CD44 PE=1 SV=3	1144	20210911_zy_cell_scehcd_1.16390.16390.3	controllerType=0 controllerNumber=1 scan=16390	68.5308
07145:2	17	R.ALGFEN[+1864.634]ATQALGR.A	HexNAc(2)Hex(9)	N[+1865]	1606.67	2	3212.34	3212.34	0	1.4	64	Specific	212.47	94.94	94.94	2.72	11	>sp|Q08380|LG3BP_HUMAN Galectin-3-binding protein OS=Homo sapiens OX=9606 GN=LGALS3BP PE=1 SV=1	4876	20210911_zy_cell_scehcd_1.7798.7798.2	controllerType=0 controllerNumber=1 scan=7798	33.8156
04575:3	252	K.FRLPVFN[+1702.581]WTALK.P	HexNAc(2)Hex(8)	N[+1703]	1065.48	3	3194.43	3194.43	0	-0.2	569	Specific	213.36	213.36	213.36	0.91	1	>sp|Q8IVF7|FMNL3_HUMAN Formin-like protein 3 OS=Homo sapiens OX=9606 GN=FMNL3 PE=1 SV=3	7989	20210911_zy_cell_scehcd_1.4992.4992.3	controllerType=0 controllerNumber=1 scan=4992	21.6669
03007:3	4	K.LRNPC[+57.021]TSEQN[+1702.581]C[+57.021]TSPFSYK.N	HexNAc(2)Hex(8)	C[+57]*2, N[+1703]	1297.86	3	3891.55	3891.56	0	-1.1	203	Specific	214.15	190.33	190.33	4.23	27	>sp|P05556|ITB1_HUMAN Integrin beta-1 OS=Homo sapiens OX=9606 GN=ITGB1 PE=1 SV=2	3061	20210911_zy_cell_scehcd_1.3281.3281.3	controllerType=0 controllerNumber=1 scan=3281	14.2483
06531:3	20	K.TC[+57.021]DWLPKPN[+2059.735]MSASC[+57.021]K.E	HexNAc(4)Hex(5)Fuc(1)NeuAc(1)	C[+57]*2, N[+2060]	1285.51	3	3854.53	3854.53	0	-1.2	93	Specific	214.53	171.84	171.84	4.24	16	>sp|P07602|SAP_HUMAN Prosaposin OS=Homo sapiens OX=9606 GN=PSAP PE=1 SV=2	14314	20210911_zy_cell_scehcd_1.7126.7126.3	controllerType=0 controllerNumber=1 scan=7126	30.9124
01470:2	201	K.N[+1702.581]STAVWR.G	HexNAc(2)Hex(8)	N[+1703]	1268.51	2	2536	2536.01	0	-1.6	302	Specific	214.58	19.68	19.68	1.91	2	>sp|Q6UW63|PLGT2_HUMAN Protein O-glucosyltransferase 2 OS=Homo sapiens OX=9606 GN=POGLUT2 PE=1 SV=1	10765	20210911_zy_cell_scehcd_1.1605.1605.2	controllerType=0 controllerNumber=1 scan=1605	6.9453
14859:3	2	K.EN[+3007.058]TSDPSLVIAFGR.G	HexNAc(5)Hex(6)Fuc(1)NeuAc(3)	N[+3007]	1504.94	3	4512.82	4512.82	0	0.6	83	Specific	214.76	149.33	149.33	2.64	55	>sp|P11279|LAMP1_HUMAN Lysosome-associated membrane glycoprotein 1 OS=Homo sapiens OX=9606 GN=LAMP1 PE=1 SV=3	4405	20210911_zy_cell_scehcd_1.17474.17474.3	controllerType=0 controllerNumber=1 scan=17474	72.7108
09503:3	41	R.WNDSPC[+57.021]N[+2350.830]QSLPSIC[+57.021]K.K	HexNAc(4)Hex(5)Fuc(1)NeuAc(2)	C[+57]*2, N[+2351]	1386.21	3	4156.63	4156.62	0	0.4	491	Specific	214.98	126.98	2.48	2.72	11	>sp|Q9UBG0|MRC2_HUMAN C-type mannose receptor 2 OS=Homo sapiens OX=9606 GN=MRC2 PE=1 SV=2	16756	20210911_zy_cell_scehcd_1.10409.10409.2	controllerType=0 controllerNumber=1 scan=10409	45.0159
04422:2	27	K.IN[+1702.581]YTVPQSGTFK.I	HexNAc(2)Hex(8)	N[+1703]	1529.15	2	3057.29	3057.28	0	4.2	418	Specific	215.22	161.71	161.71	2.33	12	>sp|Q6YHK3|CD109_HUMAN CD109 antigen OS=Homo sapiens OX=9606 GN=CD109 PE=1 SV=2	8627	20210911_zy_cell_scehcd_1.4825.4825.2	controllerType=0 controllerNumber=1 scan=4825	20.9438
07961:3	120	K.N[+1864.634]LTVC[+57.021]PDGALFEQK.G	HexNAc(2)Hex(9)	C[+57], N[+1865]	1152.81	3	3456.41	3456.41	0	-1.1	124	Specific	215.49	134.74	134.74	3.55	5	>sp|P54709|AT1B3_HUMAN Sodium/potassium-transporting ATPase subunit beta-3 OS=Homo sapiens OX=9606 GN=ATP1B3 PE=1 SV=1	20415	20210911_zy_cell_scehcd_1.8693.8693.3	controllerType=0 controllerNumber=1 scan=8693	37.6917
01397:2	18	K.AMSSN[+1540.529]ETAAYK.I	HexNAc(2)Hex(7)	N[+1541]	1357.03	2	2713.05	2713.05	0	-1.2	637	Specific	217.28	184.79	184.79	4.37	12	>sp|Q8TCJ2|STT3B_HUMAN Dolichyl-diphosphooligosaccharide--protein glycosyltransferase subunit STT3B OS=Homo sapiens OX=9606 GN=STT3B PE=1 SV=1	13685	20210911_zy_cell_scehcd_1.1525.1525.2	controllerType=0 controllerNumber=1 scan=1525	6.6003
01548:2	135	K.N[+1864.634]STAYFR.G	HexNAc(2)Hex(9)	N[+1865]	1362.02	2	2723.04	2723.04	0	-1.5	204	Specific	217.33	104.35	104.35	3.21	2	>sp|Q8NBL1|PGLT1_HUMAN Protein O-glucosyltransferase 1 OS=Homo sapiens OX=9606 GN=POGLUT1 PE=1 SV=1	12272	20210911_zy_cell_scehcd_1.1690.1690.2	controllerType=0 controllerNumber=1 scan=1690	7.3158
02425:2	254	R.QVLN[+1702.581]ITDK.D	HexNAc(2)Hex(8)	N[+1703]	1317.06	2	2633.1	2633.11	0	-1.1	563	Specific	218.17	40.53	40.53	0.91	2	>sp|P22223|CADH3_HUMAN Cadherin-3 OS=Homo sapiens OX=9606 GN=CDH3 PE=1 SV=2	5916	20210911_zy_cell_scehcd_1.2646.2646.3	controllerType=0 controllerNumber=1 scan=2646	11.4745
00362:3	31	R.GN[+1702.581]VTQHVQGHR.N	HexNAc(2)Hex(8)	N[+1703]	979.072	3	2935.2	2935.21	0	-1.4	76	Specific	218.21	54.77	54.77	3.51	7	>sp|Q15043|S39AE_HUMAN Zinc transporter ZIP14 OS=Homo sapiens OX=9606 GN=SLC39A14 PE=1 SV=3	16204	20210911_zy_cell_scehcd_1.396.396.3	controllerType=0 controllerNumber=1 scan=396	1.7165
03045:3	90	K.QRN[+1702.581]STIEAANLAGLK.I	HexNAc(2)Hex(8)	N[+1703]	1096.82	3	3288.44	3288.45	0	-0.9	182	Specific	218.33	218.33	218.33	3.3	2	>sp|P48723|HSP13_HUMAN Heat shock 70 kDa protein 13 OS=Homo sapiens OX=9606 GN=HSPA13 PE=1 SV=1	11660	20210911_zy_cell_scehcd_1.3323.3323.3	controllerType=0 controllerNumber=1 scan=3323	14.4291
01647:3	237	R.PAVNSPAN[+1403.507]QSR.G	HexNAc(3)Hex(4)Fuc(1)	N[+1404]	848.698	3	2544.08	2544.08	0	-0.8	358	Specific	218.56	28.98	28.98	0.49	3	>sp|Q6ZUS6|CC149_HUMAN Coiled-coil domain-containing protein 149 OS=Homo sapiens OX=9606 GN=CCDC149 PE=2 SV=2	4420	20210911_zy_cell_scehcd_1.1798.1798.3	controllerType=0 controllerNumber=1 scan=1798	7.786
04201:2	13	K.DSLSIN[+1702.581]ATNIK.H	HexNAc(2)Hex(8)	N[+1703]	1439.61	2	2878.21	2878.21	0	0.1	347	Specific	218.81	130.24	130.24	3.27	16	>sp|P00533|EGFR_HUMAN Epidermal growth factor receptor OS=Homo sapiens OX=9606 GN=EGFR PE=1 SV=2	19596	20210911_zy_cell_scehcd_1.4584.4584.2	controllerType=0 controllerNumber=1 scan=4584	19.9
04740:3	20	K.TC[+57.021]DWLPKPN[+1403.507]MSASC[+57.021]K.E	HexNAc(3)Hex(4)Fuc(1)	C[+57]*2, N[+1404]	1066.77	3	3198.3	3198.3	0	-0.6	93	Specific	219.19	104.45	104.45	3.54	16	>sp|P07602|SAP_HUMAN Prosaposin OS=Homo sapiens OX=9606 GN=PSAP PE=1 SV=2	14314	20210911_zy_cell_scehcd_1.5172.5172.3	controllerType=0 controllerNumber=1 scan=5172	22.4466
06072:3	4	R.NPC[+57.021]TSEQN[+2204.772]C[+57.021]TSPFSYK.N	HexNAc(4)Hex(5)NeuAc(2)	C[+57]*2, N[+2205]	1375.86	3	4125.56	4124.56	1	-1.4	205	Specific	219.24	120.46	120.46	4.25	27	>sp|P05556|ITB1_HUMAN Integrin beta-1 OS=Homo sapiens OX=9606 GN=ITGB1 PE=1 SV=2	3061	20210911_zy_cell_scehcd_1.6625.6625.3	controllerType=0 controllerNumber=1 scan=6625	28.7432
05069:3	32	R.TILVDNNTWN[+1864.634]NTHISR.V	HexNAc(2)Hex(9)	N[+1865]	1254.87	3	3762.59	3762.59	0	0.5	539	Specific	219.26	123.93	9.41	3.67	4	>sp|P46977|STT3A_HUMAN Dolichyl-diphosphooligosaccharide--protein glycosyltransferase subunit STT3A OS=Homo sapiens OX=9606 GN=STT3A PE=1 SV=2	18762	20210911_zy_cell_scehcd_1.5531.5531.3	controllerType=0 controllerNumber=1 scan=5531	24.002
01760:2	78	R.DVN[+1378.476]C[+57.021]SVM[+15.995]GPQEK.K	HexNAc(2)Hex(6)	C[+57], M[+16], N[+1378]	1379.54	2	2758.07	2758.07	0	0.1	51	Specific	219.28	150.83	150.83	3.29	3	>sp|P53634|CATC_HUMAN Dipeptidyl peptidase 1 OS=Homo sapiens OX=9606 GN=CTSC PE=1 SV=2	6868	20210911_zy_cell_scehcd_1.1921.1921.2	controllerType=0 controllerNumber=1 scan=1921	8.3242
02478:3	2	R.LLNINPN[+1987.714]K.T	HexNAc(5)Hex(6)	N[+1988]	971.757	3	2913.26	2913.26	0	-1.8	255	Specific	219.37	80.73	80.73	3.3	55	>sp|P11279|LAMP1_HUMAN Lysosome-associated membrane glycoprotein 1 OS=Homo sapiens OX=9606 GN=LAMP1 PE=1 SV=3	4405	20210911_zy_cell_scehcd_1.2704.2704.3	controllerType=0 controllerNumber=1 scan=2704	11.7268
06527:3	36	R.ELAVPDGYTN[+2350.830]R.T	HexNAc(4)Hex(5)Fuc(1)NeuAc(2)	N[+2351]	1195.82	3	3585.43	3585.44	0	-0.7	77	Specific	219.87	127.42	127.42	3.32	12	>sp|P26006|ITA3_HUMAN Integrin alpha-3 OS=Homo sapiens OX=9606 GN=ITGA3 PE=1 SV=5	6507	20210911_zy_cell_scehcd_1.7122.7122.3	controllerType=0 controllerNumber=1 scan=7122	30.8937
03211:2	67	R.SEQLVN[+1864.634]FTGK.A	HexNAc(2)Hex(9)	N[+1865]	1494.11	2	2987.21	2987.21	0	-0.7	181	Specific	219.98	128.81	128.81	3.91	4	>sp|Q9BVX2|T106C_HUMAN Transmembrane protein 106C OS=Homo sapiens OX=9606 GN=TMEM106C PE=1 SV=1	18267	20210911_zy_cell_scehcd_1.3504.3504.2	controllerType=0 controllerNumber=1 scan=3504	15.2171
05503:2	28	K.QNNGAFN[+1216.423]ETLFR.N	HexNAc(2)Hex(5)	N[+1216]	1314.05	2	2627.1	2627.1	0	-0.9	721	Specific	220.36	95.78	95.78	3.54	8	>sp|P02786|TFR1_HUMAN Transferrin receptor protein 1 OS=Homo sapiens OX=9606 GN=TFRC PE=1 SV=2	16028	20210911_zy_cell_scehcd_1.6004.6004.3	controllerType=0 controllerNumber=1 scan=6004	26.0534
00853:2	58	R.FNQC[+57.021]N[+1864.634]TTR.G	HexNAc(2)Hex(9)	C[+57], N[+1865]	1453.05	2	2905.09	2905.09	0	-1.2	137	Specific	220.61	67.98	67.98	3.79	8	>sp|P09923|PPBI_HUMAN Intestinal-type alkaline phosphatase OS=Homo sapiens OX=9606 GN=ALPI PE=1 SV=2	15196	20210911_zy_cell_scehcd_1.932.932.2	controllerType=0 controllerNumber=1 scan=932	4.0237
04158:2	97	R.VYWN[+2204.772]R.S	HexNAc(4)Hex(5)NeuAc(2)	N[+2205]	1471.58	2	2942.15	2942.15	0	1	704	Specific	220.65	1.2	1.2	0.07	9	>sp|Q7Z388|D19L4_HUMAN Probable C-mannosyltransferase DPY19L4 OS=Homo sapiens OX=9606 GN=DPY19L4 PE=1 SV=1	3670	20210911_zy_cell_scehcd_1.4537.4537.2	controllerType=0 controllerNumber=1 scan=4537	19.6963
08931:3	7	R.N[+1864.634]GSSIVDLSPLIHR.T	HexNAc(2)Hex(9)	N[+1865]	1124.82	3	3372.45	3372.46	0	-1.7	1656	Specific	220.82	13.3	13.3	2.73	21	>sp|P11717|MPRI_HUMAN Cation-independent mannose-6-phosphate receptor OS=Homo sapiens OX=9606 GN=IGF2R PE=1 SV=3	12317	20210911_zy_cell_scehcd_1.9769.9769.3	controllerType=0 controllerNumber=1 scan=9769	42.295
01063:2	112	K.GTN[+1378.476]YTVR.L	HexNAc(2)Hex(6)	N[+1378]	1094.94	2	2188.88	2188.89	0	-1.8	675	Specific	221.06	54.65	54.65	2.72	5	>sp|P07942|LAMB1_HUMAN Laminin subunit beta-1 OS=Homo sapiens OX=9606 GN=LAMB1 PE=1 SV=2	4645	20210911_zy_cell_scehcd_1.1161.1161.2	controllerType=0 controllerNumber=1 scan=1161	5.0144
00651:2	20	K.LIDNN[+1540.529]K.T	HexNAc(2)Hex(7)	N[+1541]	1128.96	2	2256.92	2256.92	0	-0.1	328	Specific	221.17	58.75	58.75	2	16	>sp|P07602|SAP_HUMAN Prosaposin OS=Homo sapiens OX=9606 GN=PSAP PE=1 SV=2	14314	20210911_zy_cell_scehcd_1.712.712.2	controllerType=0 controllerNumber=1 scan=712	3.0856
09151:2	226	R.LVQLFPN[+1702.581]DTSLK.N	HexNAc(2)Hex(8)	N[+1703]	1539.17	2	3077.34	3077.34	0	-1	446	Specific	221.3	190.46	190.46	1.71	1	>sp|Q12797|ASPH_HUMAN Aspartyl/asparaginyl beta-hydroxylase OS=Homo sapiens OX=9606 GN=ASPH PE=1 SV=3	3658	20210911_zy_cell_scehcd_1.10014.10014.2	controllerType=0 controllerNumber=1 scan=10014	43.3401
01899:3	15	R.YN[+1864.634]C[+57.021]SIESPR.K	HexNAc(2)Hex(9)	C[+57], N[+1865]	997.381	3	2990.13	2990.13	0	-1.9	695	Specific	221.34	96.93	96.93	3.3	13	>sp|O00469|PLOD2_HUMAN Procollagen-lysine,2-oxoglutarate 5-dioxygenase 2 OS=Homo sapiens OX=9606 GN=PLOD2 PE=1 SV=2	15649	20210911_zy_cell_scehcd_1.2072.2072.3	controllerType=0 controllerNumber=1 scan=2072	8.9802
04322:2	121	K.N[+1864.634]VTLILDC[+57.021]K.K	HexNAc(2)Hex(9)	C[+57], N[+1865]	1470.61	2	2940.22	2940.22	0	0.1	176	Specific	221.48	118.07	118.07	3.27	2	>sp|P20908|CO5A1_HUMAN Collagen alpha-1(V) chain OS=Homo sapiens OX=9606 GN=COL5A1 PE=1 SV=3	2503	20210911_zy_cell_scehcd_1.4716.4716.2	controllerType=0 controllerNumber=1 scan=4716	20.4706
06779:3	126	K.ILLTC[+57.021]SLN[+1702.581]DSATEVTGHR.W	HexNAc(2)Hex(8)	C[+57], N[+1703]	1230.53	3	3689.57	3689.57	0	-1.4	153	Specific	222.36	220.01	220.01	5.11	2	>sp|P35613|BASI_HUMAN Basigin OS=Homo sapiens OX=9606 GN=BSG PE=1 SV=2	8365	20210911_zy_cell_scehcd_1.7398.7398.3	controllerType=0 controllerNumber=1 scan=7398	32.0857
00551:2	7	R.YHN[+1540.529]QTLR.Y	HexNAc(2)Hex(7)	N[+1541]	1236.5	2	2472	2472	0	-1.2	398	Specific	222.86	35.84	35.84	2.25	21	>sp|P11717|MPRI_HUMAN Cation-independent mannose-6-phosphate receptor OS=Homo sapiens OX=9606 GN=IGF2R PE=1 SV=3	12317	20210911_zy_cell_scehcd_1.603.603.2	controllerType=0 controllerNumber=1 scan=603	2.6119
00045:3	103	K.KKEDALN[+1864.634]ETR.E	HexNAc(2)Hex(9)	N[+1865]	1023.42	3	3068.26	3068.27	0	-2.2	80	Specific	223.34	36.43	36.43	1.98	5	>sp|P10909|CLUS_HUMAN Clusterin OS=Homo sapiens OX=9606 GN=CLU PE=1 SV=1	6125	20210911_zy_cell_scehcd_1.51.51.3	controllerType=0 controllerNumber=1 scan=51	0.2164
03860:2	184	R.LSITN[+1864.634]ETFR.K	HexNAc(2)Hex(9)	N[+1865]	1473.1	2	2945.2	2945.2	0	-0.1	193	Specific	223.57	39.74	39.74	2.72	2	>sp|Q9BX74|TM2D1_HUMAN TM2 domain-containing protein 1 OS=Homo sapiens OX=9606 GN=TM2D1 PE=1 SV=1	18643	20210911_zy_cell_scehcd_1.4212.4212.2	controllerType=0 controllerNumber=1 scan=4212	18.2855
06747:3	126	K.ILLTC[+57.021]SLN[+1702.581]DSATEVTGHR.W	HexNAc(2)Hex(8)	C[+57], N[+1703]	1230.53	3	3689.57	3689.57	0	-1.4	153	Specific	224.18	224.18	224.18	5.11	2	>sp|P35613|BASI_HUMAN Basigin OS=Homo sapiens OX=9606 GN=BSG PE=1 SV=2	8365	20210911_zy_cell_scehcd_1.7363.7363.3	controllerType=0 controllerNumber=1 scan=7363	31.9344
04092:3	97	R.VYWN[+2204.772]R.S	HexNAc(4)Hex(5)NeuAc(2)	N[+2205]	981.386	3	2942.14	2942.15	0	-1.1	704	Specific	226.14	1.2	1.2	1.12	9	>sp|Q7Z388|D19L4_HUMAN Probable C-mannosyltransferase DPY19L4 OS=Homo sapiens OX=9606 GN=DPY19L4 PE=1 SV=1	3670	20210911_zy_cell_scehcd_1.4465.4465.3	controllerType=0 controllerNumber=1 scan=4465	19.3841
01525:3	237	R.PAVNSPAN[+1581.555]QSR.G	HexNAc(3)Hex(6)	N[+1582]	908.05	3	2722.14	2722.13	0	2	358	Specific	226.73	101.46	101.46	0.5	3	>sp|Q6ZUS6|CC149_HUMAN Coiled-coil domain-containing protein 149 OS=Homo sapiens OX=9606 GN=CCDC149 PE=2 SV=2	4420	20210911_zy_cell_scehcd_1.1665.1665.3	controllerType=0 controllerNumber=1 scan=1665	7.2067
00653:2	104	K.ILN[+1702.581]GSNK.K	HexNAc(2)Hex(8)	N[+1703]	1224.5	2	2448	2448	0	-1.6	193	Specific	226.87	10.1	10.1	3.26	2	>sp|Q9UBV2|SE1L1_HUMAN Protein sel-1 homolog 1 OS=Homo sapiens OX=9606 GN=SEL1L PE=1 SV=3	14445	20210911_zy_cell_scehcd_1.714.714.2	controllerType=0 controllerNumber=1 scan=714	3.0953
03296:2	2	R.GHTLTLN[+1054.370]FTR.N	HexNAc(2)Hex(4)	N[+1054]	1107.5	2	2213.99	2213.99	0	-1.7	97	Specific	227.13	115.87	115.87	4.4	55	>sp|P11279|LAMP1_HUMAN Lysosome-associated membrane glycoprotein 1 OS=Homo sapiens OX=9606 GN=LAMP1 PE=1 SV=3	4405	20210911_zy_cell_scehcd_1.3596.3596.2	controllerType=0 controllerNumber=1 scan=3596	15.6154
00584:2	262	R.N[+2188.740]ASAVAR.K	HexNAc(2)Hex(11)	N[+2189]	1439.06	2	2877.11	2877.11	0	-1	1665	Specific	228.67	1.71	1.71	0.88	2	>sp|Q9NSI6|BRWD1_HUMAN Bromodomain and WD repeat-containing protein 1 OS=Homo sapiens OX=9606 GN=BRWD1 PE=1 SV=4	3481	20210911_zy_cell_scehcd_1.639.639.2	controllerType=0 controllerNumber=1 scan=639	2.7683
03537:2	139	K.SN[+1872.651]LTVLR.E	HexNAc(3)Hex(6)NeuAc(1)	N[+1873]	1338.07	2	2675.12	2675.13	0	-1.8	704	Specific	228.74	25.06	25.06	3.17	5	>sp|P18084|ITB5_HUMAN Integrin beta-5 OS=Homo sapiens OX=9606 GN=ITGB5 PE=1 SV=1	11995	20210911_zy_cell_scehcd_1.3859.3859.2	controllerType=0 controllerNumber=1 scan=3859	16.7552
00585:2	20	K.LIDNN[+1540.529]K.T	HexNAc(2)Hex(7)	N[+1541]	1128.96	2	2256.92	2256.92	0	-1.7	328	Specific	228.87	57.76	57.76	4.35	16	>sp|P07602|SAP_HUMAN Prosaposin OS=Homo sapiens OX=9606 GN=PSAP PE=1 SV=2	14314	20210911_zy_cell_scehcd_1.640.640.2	controllerType=0 controllerNumber=1 scan=640	2.7729
01537:2	8	K.NN[+1216.423]HTASILDR.M	HexNAc(2)Hex(5)	N[+1216]	1179	2	2356.99	2357	0	-1.5	129	Specific	229.05	70.49	70.49	4.19	19	>sp|P08962|CD63_HUMAN CD63 antigen OS=Homo sapiens OX=9606 GN=CD63 PE=1 SV=2	5151	20210911_zy_cell_scehcd_1.1678.1678.2	controllerType=0 controllerNumber=1 scan=1678	7.2636
06407:3	124	K.HN[+1864.634]ISHMSMDIAR.G	HexNAc(2)Hex(9)	N[+1865]	1092.77	3	3276.29	3276.29	0	-0.7	367	Specific	229.17	152.7	152.7	5.05	6	>sp|Q8IWB7|WDFY1_HUMAN WD repeat and FYVE domain-containing protein 1 OS=Homo sapiens OX=9606 GN=WDFY1 PE=1 SV=1	17515	20210911_zy_cell_scehcd_1.6991.6991.3	controllerType=0 controllerNumber=1 scan=6991	30.3267
00683:2	7	R.YHN[+1540.529]QTLR.Y	HexNAc(2)Hex(7)	N[+1541]	1236.5	2	2472	2472	0	-0.8	398	Specific	229.3	93.14	93.14	4.24	21	>sp|P11717|MPRI_HUMAN Cation-independent mannose-6-phosphate receptor OS=Homo sapiens OX=9606 GN=IGF2R PE=1 SV=3	12317	20210911_zy_cell_scehcd_1.747.747.2	controllerType=0 controllerNumber=1 scan=747	3.2377
11012:3	27	K.IN[+3007.058]YTVPQSGTFK.I	HexNAc(5)Hex(6)Fuc(1)NeuAc(3)	N[+3007]	1454.59	3	4361.76	4361.76	0	-0.3	418	Specific	229.75	114.58	114.58	4.58	12	>sp|Q6YHK3|CD109_HUMAN CD109 antigen OS=Homo sapiens OX=9606 GN=CD109 PE=1 SV=2	8627	20210911_zy_cell_scehcd_1.12170.12170.3	controllerType=0 controllerNumber=1 scan=12170	52.2896
02099:2	26	K.HTNMN[+1216.423]LTQLK.V	HexNAc(2)Hex(5)	N[+1216]	1208.52	2	2416.04	2416.04	0	-3.1	250	Specific	230.11	116.41	116.41	4.27	11	>sp|Q15165|PON2_HUMAN Serum paraoxonase/arylesterase 2 OS=Homo sapiens OX=9606 GN=PON2 PE=1 SV=4	9244	20210911_zy_cell_scehcd_1.2291.2291.2	controllerType=0 controllerNumber=1 scan=2291	9.9278
02892:2	107	R.N[+1864.634]LSFMAR.F	HexNAc(2)Hex(9)	N[+1865]	1352.03	2	2703.06	2703.06	0	-0.3	539	Specific	230.32	91.52	91.52	4.37	3	>sp|Q9Y6A1|POMT1_HUMAN Protein O-mannosyl-transferase 1 OS=Homo sapiens OX=9606 GN=POMT1 PE=1 SV=3	10077	20210911_zy_cell_scehcd_1.3156.3156.2	controllerType=0 controllerNumber=1 scan=3156	13.7016
04707:3	172	K.VLGQSQEPNVNPASAGN[+2350.830]QTQK.T	HexNAc(4)Hex(5)Fuc(1)NeuAc(2)	N[+2351]	1506.64	3	4517.9	4517.9	0	-1.3	153	Specific	231.02	176.59	176.59	5.35	1	>sp|Q5VW38|GP107_HUMAN Protein GPR107 OS=Homo sapiens OX=9606 GN=GPR107 PE=1 SV=1	8685	20210911_zy_cell_scehcd_1.5136.5136.3	controllerType=0 controllerNumber=1 scan=5136	22.2907
05401:3	151	R.SQN[+2026.687]DTVTPDVWYTSK.P	HexNAc(2)Hex(10)	N[+2027]	1256.5	3	3767.49	3767.49	0	-1.5	375	Specific	231.05	227.28	227.28	5.31	1	>sp|Q9BTY2|FUCO2_HUMAN Plasma alpha-L-fucosidase OS=Homo sapiens OX=9606 GN=FUCA2 PE=1 SV=2	6960	20210911_zy_cell_scehcd_1.5893.5893.3	controllerType=0 controllerNumber=1 scan=5893	25.5714
04345:4	25	R.FTFTSHTPGEHQIC[+57.021]LHSN[+2350.830]STK.F	HexNAc(4)Hex(5)Fuc(1)NeuAc(2)	C[+57], N[+2351]	1195.74	4	4779.96	4779.96	0	-1.1	108	Specific	231.08	62.87	62.87	5.2	6	>sp|Q9BVK6|TMED9_HUMAN Transmembrane emp24 domain-containing protein 9 OS=Homo sapiens OX=9606 GN=TMED9 PE=1 SV=2	14554	20210911_zy_cell_scehcd_1.4741.4741.2	controllerType=0 controllerNumber=1 scan=4741	20.5797
09352:3	7	K.TN[+1702.581]ITLVC[+57.021]KPGDLESAPVLR.T	HexNAc(2)Hex(8)	C[+57], N[+1703]	1262.57	3	3785.69	3785.7	0	-2.5	580	Specific	231.26	231.26	231.26	6.2	21	>sp|P11717|MPRI_HUMAN Cation-independent mannose-6-phosphate receptor OS=Homo sapiens OX=9606 GN=IGF2R PE=1 SV=3	12317	20210911_zy_cell_scehcd_1.10238.10238.3	controllerType=0 controllerNumber=1 scan=10238	44.2951
05098:3	180	R.SLHVPGLN[+2350.830]K.T	HexNAc(4)Hex(5)Fuc(1)NeuAc(2)	N[+2351]	1105.8	3	3315.38	3315.39	0	-2.8	191	Specific	232.19	100.81	100.81	4.84	1	>sp|P30530|UFO_HUMAN Tyrosine-protein kinase receptor UFO OS=Homo sapiens OX=9606 GN=AXL PE=1 SV=4	18964	20210911_zy_cell_scehcd_1.5562.5562.3	controllerType=0 controllerNumber=1 scan=5562	24.1386
08778:3	2	K.EN[+1864.634]TSDPSLVIAFGR.G	HexNAc(2)Hex(9)	N[+1865]	1124.13	3	3370.38	3370.39	0	-2.9	83	Specific	232.62	232.62	232.62	4.75	55	>sp|P11279|LAMP1_HUMAN Lysosome-associated membrane glycoprotein 1 OS=Homo sapiens OX=9606 GN=LAMP1 PE=1 SV=3	4405	20210911_zy_cell_scehcd_1.9598.9598.3	controllerType=0 controllerNumber=1 scan=9598	41.5676
03444:2	144	R.DFQHLLN[+2026.687]R.T	HexNAc(2)Hex(10)	N[+2027]	1535.12	2	3069.23	3069.23	0	-0.9	231	Specific	233.23	24.74	24.74	3.68	3	>sp|Q13444|ADA15_HUMAN Disintegrin and metalloproteinase domain-containing protein 15 OS=Homo sapiens OX=9606 GN=ADAM15 PE=1 SV=4	339	20210911_zy_cell_scehcd_1.3758.3758.2	controllerType=0 controllerNumber=1 scan=3758	16.3147
03708:3	143	K.PGTLLPTDRN[+1702.581]NSMC[+57.021]TTMR.D	HexNAc(2)Hex(8)	C[+57], N[+1703]	1256.52	3	3767.54	3767.54	0	-0.9	627	Specific	233.75	147.57	147.57	4.31	3	>sp|Q9UHN6|CEIP2_HUMAN Cell surface hyaluronidase OS=Homo sapiens OX=9606 GN=CEMIP2 PE=1 SV=1	1119	20210911_zy_cell_scehcd_1.4046.4046.3	controllerType=0 controllerNumber=1 scan=4046	17.5659
08209:3	58	K.HQGAWYVWN[+2204.772]R.T	HexNAc(4)Hex(5)NeuAc(2)	N[+2205]	1174.47	3	3521.4	3521.4	0	-0.4	260	Specific	234.29	83.73	83.73	5.18	8	>sp|P09923|PPBI_HUMAN Intestinal-type alkaline phosphatase OS=Homo sapiens OX=9606 GN=ALPI PE=1 SV=2	15196	20210911_zy_cell_scehcd_1.8965.8965.3	controllerType=0 controllerNumber=1 scan=8965	38.8653
08551:3	36	R.VWN[+1864.634]STFIEDYR.D	HexNAc(2)Hex(9)	N[+1865]	1098.77	3	3294.3	3294.31	0	-4	933	Specific	234.84	122.64	122.64	4.18	12	>sp|P26006|ITA3_HUMAN Integrin alpha-3 OS=Homo sapiens OX=9606 GN=ITGA3 PE=1 SV=5	6507	20210911_zy_cell_scehcd_1.9344.9344.3	controllerType=0 controllerNumber=1 scan=9344	40.488
01267:2	26	K.HTNM[+15.995]N[+1216.423]LTQLK.V	HexNAc(2)Hex(5)	M[+16], N[+1216]	1216.52	2	2432.03	2432.04	0	-2.8	250	Specific	234.97	50.23	50.23	3.25	11	>sp|Q15165|PON2_HUMAN Serum paraoxonase/arylesterase 2 OS=Homo sapiens OX=9606 GN=PON2 PE=1 SV=4	9244	20210911_zy_cell_scehcd_1.1383.1383.2	controllerType=0 controllerNumber=1 scan=1383	5.9819
03629:2	260	R.N[+1872.651]STIVLR.T	HexNAc(3)Hex(6)NeuAc(1)	N[+1873]	1338.07	2	2675.13	2675.13	0	-1.1	451	Specific	235.5	3.61	3.61	0.88	1	>sp|Q8NEY1|NAV1_HUMAN Neuron navigator 1 OS=Homo sapiens OX=9606 GN=NAV1 PE=1 SV=2	11447	20210911_zy_cell_scehcd_1.3960.3960.2	controllerType=0 controllerNumber=1 scan=3960	17.1915
03850:3	247	K.RSQSPFWQN[+1702.581]FSR.L	HexNAc(2)Hex(8)	N[+1703]	1081.45	3	3242.33	3242.33	0	0.9	499	Specific	235.54	46.11	46.11	0.88	2	>sp|O43307|ARHG9_HUMAN Rho guanine nucleotide exchange factor 9 OS=Homo sapiens OX=9606 GN=ARHGEF9 PE=1 SV=3	19843	20210911_zy_cell_scehcd_1.4201.4201.3	controllerType=0 controllerNumber=1 scan=4201	18.2381
04225:3	97	R.VYWN[+2204.772]R.S	HexNAc(4)Hex(5)NeuAc(2)	N[+2205]	981.385	3	2942.14	2942.15	0	-1.4	704	Specific	235.65	1.2	1.2	2.73	9	>sp|Q7Z388|D19L4_HUMAN Probable C-mannosyltransferase DPY19L4 OS=Homo sapiens OX=9606 GN=DPY19L4 PE=1 SV=1	3670	20210911_zy_cell_scehcd_1.4610.4610.3	controllerType=0 controllerNumber=1 scan=4610	20.0138
00617:3	7	R.YHN[+1540.529]QTLR.Y	HexNAc(2)Hex(7)	N[+1541]	824.671	3	2472	2472	0	-2.1	398	Specific	236.37	41.79	41.79	3.42	21	>sp|P11717|MPRI_HUMAN Cation-independent mannose-6-phosphate receptor OS=Homo sapiens OX=9606 GN=IGF2R PE=1 SV=3	12317	20210911_zy_cell_scehcd_1.675.675.3	controllerType=0 controllerNumber=1 scan=675	2.9244
03376:3	36	R.M[+15.995]N[+3007.058]ITVK.N	HexNAc(5)Hex(6)Fuc(1)NeuAc(3)	M[+16], N[+3007]	1243.48	3	3728.44	3728.45	0	-2.6	106	Specific	236.83	49.66	49.66	2.73	12	>sp|P26006|ITA3_HUMAN Integrin alpha-3 OS=Homo sapiens OX=9606 GN=ITGA3 PE=1 SV=5	6507	20210911_zy_cell_scehcd_1.3684.3684.3	controllerType=0 controllerNumber=1 scan=3684	15.9919
02220:3	71	R.YVQN[+2059.735]GTYTVK.I	HexNAc(4)Hex(5)Fuc(1)NeuAc(1)	N[+2060]	1078.11	3	3232.33	3232.33	0	-1.3	459	Specific	237.01	78.71	78.71	4.7	4	>sp|Q14126|DSG2_HUMAN Desmoglein-2 OS=Homo sapiens OX=9606 GN=DSG2 PE=1 SV=2	1442	20210911_zy_cell_scehcd_1.2423.2423.3	controllerType=0 controllerNumber=1 scan=2423	10.5
08878:3	7	R.N[+2026.687]GSSIVDLSPLIHR.T	HexNAc(2)Hex(10)	N[+2027]	1178.84	3	3534.5	3534.51	0	-1.6	1656	Specific	237.86	9.54	9.54	4.2	21	>sp|P11717|MPRI_HUMAN Cation-independent mannose-6-phosphate receptor OS=Homo sapiens OX=9606 GN=IGF2R PE=1 SV=3	12317	20210911_zy_cell_scehcd_1.9710.9710.3	controllerType=0 controllerNumber=1 scan=9710	42.0433
03961:2	3	R.GYN[+2026.687]VTYWR.E	HexNAc(2)Hex(10)	N[+2027]	1543.1	2	3085.19	3085.19	0	-1.1	847	Specific	238.1	149.94	149.94	5.66	29	>sp|P32004|L1CAM_HUMAN Neural cell adhesion molecule L1 OS=Homo sapiens OX=9606 GN=L1CAM PE=1 SV=2	3537	20210911_zy_cell_scehcd_1.4322.4322.2	controllerType=0 controllerNumber=1 scan=4322	18.764
02037:2	10	R.AEPPLN[+1378.476]ASASDQGEK.V	HexNAc(2)Hex(6)	N[+1378]	1446.6	2	2892.18	2892.19	0	-1.9	926	Specific	238.37	172.2	172.2	4.41	16	>sp|Q9Y4L1|HYOU1_HUMAN Hypoxia up-regulated protein 1 OS=Homo sapiens OX=9606 GN=HYOU1 PE=1 SV=1	14756	20210911_zy_cell_scehcd_1.2223.2223.2	controllerType=0 controllerNumber=1 scan=2223	9.6368
03923:3	247	K.RSQSPFWQN[+1702.581]FSR.L	HexNAc(2)Hex(8)	N[+1703]	1081.45	3	3242.33	3242.33	0	0.7	499	Specific	239.38	39.73	39.73	0.88	2	>sp|O43307|ARHG9_HUMAN Rho guanine nucleotide exchange factor 9 OS=Homo sapiens OX=9606 GN=ARHGEF9 PE=1 SV=3	19843	20210911_zy_cell_scehcd_1.4280.4280.3	controllerType=0 controllerNumber=1 scan=4280	18.5831
01269:3	26	K.HTNM[+15.995]N[+1540.529]LTQLK.V	HexNAc(2)Hex(7)	M[+16], N[+1541]	919.384	3	2756.14	2756.14	0	-2.2	250	Specific	239.84	36.54	36.54	4.52	11	>sp|Q15165|PON2_HUMAN Serum paraoxonase/arylesterase 2 OS=Homo sapiens OX=9606 GN=PON2 PE=1 SV=4	9244	20210911_zy_cell_scehcd_1.1385.1385.3	controllerType=0 controllerNumber=1 scan=1385	5.9911
04994:2	51	R.AQFTFFN[+2026.687]K.T	HexNAc(2)Hex(10)	N[+2027]	1515.1	2	3029.19	3029.19	0	-0.2	744	Specific	239.95	167.53	167.53	4.8	13	>sp|Q86SQ4|AGRG6_HUMAN Adhesion G-protein coupled receptor G6 OS=Homo sapiens OX=9606 GN=ADGRG6 PE=1 SV=3	642	20210911_zy_cell_scehcd_1.5449.5449.2	controllerType=0 controllerNumber=1 scan=5449	23.6478
02836:3	40	R.EQIN[+1540.529]ITLDHR.C	HexNAc(2)Hex(7)	N[+1541]	927.063	3	2779.18	2779.18	0	-0.7	194	Specific	240	157.17	157.17	5.42	7	>sp|Q02809|PLOD1_HUMAN Procollagen-lysine,2-oxoglutarate 5-dioxygenase 1 OS=Homo sapiens OX=9606 GN=PLOD1 PE=1 SV=2	10199	20210911_zy_cell_scehcd_1.3095.3095.3	controllerType=0 controllerNumber=1 scan=3095	13.4325
01203:3	41	K.KPN[+1864.634]ATAEPTPPDR.W	HexNAc(2)Hex(9)	N[+1865]	1086.78	3	3258.34	3258.34	0	-1.2	362	Specific	240.32	103.38	103.38	5.23	11	>sp|Q9UBG0|MRC2_HUMAN C-type mannose receptor 2 OS=Homo sapiens OX=9606 GN=MRC2 PE=1 SV=2	16756	20210911_zy_cell_scehcd_1.1313.1313.3	controllerType=0 controllerNumber=1 scan=1313	5.6795
00111:3	103	K.KKEDALN[+1864.634]ETR.E	HexNAc(2)Hex(9)	N[+1865]	1023.42	3	3068.26	3068.27	0	-2.8	80	Specific	240.35	203.45	203.45	4.28	5	>sp|P10909|CLUS_HUMAN Clusterin OS=Homo sapiens OX=9606 GN=CLU PE=1 SV=1	6125	20210911_zy_cell_scehcd_1.123.123.3	controllerType=0 controllerNumber=1 scan=123	0.5289
06377:3	133	R.GNRN[+1540.529]RTGSTSSSSSGK.K	HexNAc(2)Hex(7)	N[+1541]	1041.77	3	3123.28	3123.28	0	0.1	153	Specific	240.4	201.62	201.62	4.35	3	>sp|O00423|EMAL1_HUMAN Echinoderm microtubule-associated protein-like 1 OS=Homo sapiens OX=9606 GN=EML1 PE=1 SV=3	19429	20210911_zy_cell_scehcd_1.6958.6958.3	controllerType=0 controllerNumber=1 scan=6958	30.1848
03460:2	144	R.DFQHLLN[+1864.634]R.T	HexNAc(2)Hex(9)	N[+1865]	1454.09	2	2907.18	2907.18	0	0	231	Specific	240.45	70.93	70.93	4.28	3	>sp|Q13444|ADA15_HUMAN Disintegrin and metalloproteinase domain-containing protein 15 OS=Homo sapiens OX=9606 GN=ADAM15 PE=1 SV=4	339	20210911_zy_cell_scehcd_1.3775.3775.2	controllerType=0 controllerNumber=1 scan=3775	16.3899
00955:2	255	R.N[+1872.651]ASLR.M	HexNAc(3)Hex(6)NeuAc(1)	N[+1873]	1216.98	2	2432.96	2432.97	0	-1.5	105	Specific	240.98	0	0	0.88	3	>sp|P15151|PVR_HUMAN Poliovirus receptor OS=Homo sapiens OX=9606 GN=PVR PE=1 SV=2	15210	20210911_zy_cell_scehcd_1.1043.1043.2	controllerType=0 controllerNumber=1 scan=1043	4.5031
00955:2	258	K.N[+1872.651]GTLR.I	HexNAc(3)Hex(6)NeuAc(1)	N[+1873]	1216.98	2	2432.96	2432.97	0	-1.5	463	Specific	240.98	0	0	0.88	1	>sp|Q13308|PTK7_HUMAN Inactive tyrosine-protein kinase 7 OS=Homo sapiens OX=9606 GN=PTK7 PE=1 SV=2	10329	20210911_zy_cell_scehcd_1.1043.1043.2	controllerType=0 controllerNumber=1 scan=1043	4.5031
06440:3	124	K.HN[+1702.581]ISHMSMDIAR.G	HexNAc(2)Hex(8)	N[+1703]	1038.75	3	3114.24	3114.24	0	-1	367	Specific	241.44	157.63	157.63	5.28	6	>sp|Q8IWB7|WDFY1_HUMAN WD repeat and FYVE domain-containing protein 1 OS=Homo sapiens OX=9606 GN=WDFY1 PE=1 SV=1	17515	20210911_zy_cell_scehcd_1.7027.7027.3	controllerType=0 controllerNumber=1 scan=7027	30.4826
02920:3	1	K.VASVININPN[+1581.555]TTHSTGSC[+57.021]R.S	HexNAc(3)Hex(6)	C[+57], N[+1582]	1203.85	3	3609.54	3609.55	0	-1.5	248	Specific	241.83	161.81	161.81	6.03	36	>sp|P13473|LAMP2_HUMAN Lysosome-associated membrane glycoprotein 2 OS=Homo sapiens OX=9606 GN=LAMP2 PE=1 SV=2	6694	20210911_zy_cell_scehcd_1.3186.3186.3	controllerType=0 controllerNumber=1 scan=3186	13.8344
04214:2	16	K.LLNN[+2026.687]LTSIK.I	HexNAc(2)Hex(10)	N[+2027]	1521.65	2	3042.3	3042.3	0	0.1	647	Specific	241.92	202.06	202.06	4.99	15	>sp|P11047|LAMC1_HUMAN Laminin subunit gamma-1 OS=Homo sapiens OX=9606 GN=LAMC1 PE=1 SV=3	4746	20210911_zy_cell_scehcd_1.4598.4598.2	controllerType=0 controllerNumber=1 scan=4598	19.9617
05677:2	188	R.NNVITLN[+1540.529]ITGK.A	HexNAc(2)Hex(7)	N[+1541]	1364.11	2	2727.2	2727.21	0	-1.4	458	Specific	242.24	157.72	157.72	5.66	1	>sp|P16278|BGAL_HUMAN Beta-galactosidase OS=Homo sapiens OX=9606 GN=GLB1 PE=1 SV=2	213	20210911_zy_cell_scehcd_1.6194.6194.2	controllerType=0 controllerNumber=1 scan=6194	26.8766
01229:2	216	K.YSN[+1702.581]NSWR.Y	HexNAc(2)Hex(8)	N[+1703]	1315	2	2628.99	2628.99	0	-1	174	Specific	242.26	131.79	131.79	2.2	1	>sp|P01137|TGFB1_HUMAN Transforming growth factor beta-1 proprotein OS=Homo sapiens OX=9606 GN=TGFB1 PE=1 SV=2	15677	20210911_zy_cell_scehcd_1.1342.1342.2	controllerType=0 controllerNumber=1 scan=1342	5.8034
02271:3	197	K.GNPAAYGITVTNHPM[+15.995]N[+1864.634]K.T	HexNAc(2)Hex(9)	M[+16], N[+1865]	1222.5	3	3665.49	3665.5	0	-3.2	1760	Specific	242.85	172.65	172.65	5.44	1	>sp|Q9BZC7|ABCA2_HUMAN ATP-binding cassette sub-family A member 2 OS=Homo sapiens OX=9606 GN=ABCA2 PE=1 SV=4	443	20210911_zy_cell_scehcd_1.2478.2478.3	controllerType=0 controllerNumber=1 scan=2478	10.7425
01746:2	206	K.FN[+1540.529]SSSSSLEEK.I	HexNAc(2)Hex(7)	N[+1541]	1378.04	2	2755.08	2755.08	0	0.1	192	Specific	243.07	143.47	143.47	2.49	2	>sp|Q9H173|SIL1_HUMAN Nucleotide exchange factor SIL1 OS=Homo sapiens OX=9606 GN=SIL1 PE=1 SV=1	1838	20210911_zy_cell_scehcd_1.1906.1906.2	controllerType=0 controllerNumber=1 scan=1906	8.2574
03345:3	14	R.IAPASN[+1702.581]VSHTVVLRPLK.A	HexNAc(2)Hex(8)	N[+1703]	1168.89	3	3504.64	3504.65	0	-1.3	83	Specific	243.1	243.1	243.1	6.3	7	>sp|P43308|SSRB_HUMAN Translocon-associated protein subunit beta OS=Homo sapiens OX=9606 GN=SSR2 PE=1 SV=1	13071	20210911_zy_cell_scehcd_1.3650.3650.3	controllerType=0 controllerNumber=1 scan=3650	15.8453
07077:3	37	K.YQTLN[+1540.529]C[+57.021]SVNVNC[+57.021]VNIR.C	HexNAc(2)Hex(7)	C[+57]*2, N[+1541]	1165.49	3	3494.45	3494.46	0	-0.8	962	Specific	243.12	173.07	173.07	5.31	11	>sp|P23229|ITA6_HUMAN Integrin alpha-6 OS=Homo sapiens OX=9606 GN=ITGA6 PE=1 SV=5	4737	20210911_zy_cell_scehcd_1.7724.7724.3	controllerType=0 controllerNumber=1 scan=7724	33.4945
06430:2	49	R.SAEFFN[+1702.581]YTVR.T	HexNAc(2)Hex(8)	N[+1703]	1468.59	2	2936.17	2936.17	0	-1.1	58	Specific	244.08	125.81	125.81	5.43	5	>sp|O60568|PLOD3_HUMAN Multifunctional procollagen lysine hydroxylase and glycosyltransferase LH3 OS=Homo sapiens OX=9606 GN=PLOD3 PE=1 SV=1	10856	20210911_zy_cell_scehcd_1.7016.7016.2	controllerType=0 controllerNumber=1 scan=7016	30.4353
03209:2	123	R.N[+1864.634]YTLWR.V	HexNAc(2)Hex(9)	N[+1865]	1359.04	2	2717.07	2717.07	0	-1.2	184	Specific	244.17	87.04	87.04	4.56	4	>sp|Q9UBR2|CATZ_HUMAN Cathepsin Z OS=Homo sapiens OX=9606 GN=CTSZ PE=1 SV=1	19942	20210911_zy_cell_scehcd_1.3502.3502.2	controllerType=0 controllerNumber=1 scan=3502	15.2073
09004:3	108	K.AFN[+2204.772]STLPTMAQM[+15.995]EK.A	HexNAc(4)Hex(5)NeuAc(2)	M[+16], N[+2205]	1263.84	3	3789.51	3789.51	0	-1	55	Specific	244.32	132.75	47.26	4.58	10	>sp|P16070|CD44_HUMAN CD44 antigen OS=Homo sapiens OX=9606 GN=CD44 PE=1 SV=3	1144	20210911_zy_cell_scehcd_1.9850.9850.3	controllerType=0 controllerNumber=1 scan=9850	42.6415
02713:2	48	R.FINYN[+1540.529]QTVSR.M	HexNAc(2)Hex(7)	N[+1541]	1391.58	2	2782.15	2782.16	0	-1.7	909	Specific	244.43	81.01	81.01	5.41	6	>sp|Q8N766|EMC1_HUMAN ER membrane protein complex subunit 1 OS=Homo sapiens OX=9606 GN=EMC1 PE=1 SV=1	4991	20210911_zy_cell_scehcd_1.2960.2960.2	controllerType=0 controllerNumber=1 scan=2960	12.8428
06301:3	133	R.GNRN[+1864.634]RTGSTSSSSSGK.K	HexNAc(2)Hex(9)	N[+1865]	1149.8	3	3447.39	3447.39	0	0.8	153	Specific	245.29	188.09	188.09	3.84	3	>sp|O00423|EMAL1_HUMAN Echinoderm microtubule-associated protein-like 1 OS=Homo sapiens OX=9606 GN=EML1 PE=1 SV=3	19429	20210911_zy_cell_scehcd_1.6875.6875.2	controllerType=0 controllerNumber=1 scan=6875	29.8254
01225:2	140	R.N[+1864.634]FTVAC[+57.021]QHR.S	HexNAc(2)Hex(9)	C[+57], N[+1865]	1499.09	2	2997.16	2997.17	0	-0.3	785	Specific	245.51	43	43	4.36	4	>sp|P08581|MET_HUMAN Hepatocyte growth factor receptor OS=Homo sapiens OX=9606 GN=MET PE=1 SV=4	11721	20210911_zy_cell_scehcd_1.1337.1337.2	controllerType=0 controllerNumber=1 scan=1337	5.7839
00901:2	212	K.LIN[+1702.581]R.T	HexNAc(2)Hex(8)	N[+1703]	1109.46	2	2217.91	2217.91	0	-1.6	1522	Specific	245.96	154.73	154.73	2.39	4	>sp|Q8TEP8|CE192_HUMAN Centrosomal protein of 192 kDa OS=Homo sapiens OX=9606 GN=CEP192 PE=1 SV=3	11330	20210911_zy_cell_scehcd_1.984.984.2	controllerType=0 controllerNumber=1 scan=984	4.2467
05424:3	88	K.QPVSPVIHPPVSYN[+2026.687]DTAPR.I	HexNAc(2)Hex(10)	N[+2027]	1367.26	3	4099.75	4100.76	-1	-0.4	248	Specific	246.38	192.62	192.62	5.24	4	>sp|Q15904|VAS1_HUMAN V-type proton ATPase subunit S1 OS=Homo sapiens OX=9606 GN=ATP6AP1 PE=1 SV=2	13411	20210911_zy_cell_scehcd_1.5918.5918.3	controllerType=0 controllerNumber=1 scan=5918	25.6802
00968:2	217	R.N[+1702.581]FSGPDK.D	HexNAc(2)Hex(8)	N[+1703]	1233.97	2	2466.93	2466.94	0	-1.7	502	Specific	247.17	93.61	93.61	2.18	1	>sp|Q8IWF2|FXRD2_HUMAN FAD-dependent oxidoreductase domain-containing protein 2 OS=Homo sapiens OX=9606 GN=FOXRED2 PE=1 SV=1	6148	20210911_zy_cell_scehcd_1.1057.1057.2	controllerType=0 controllerNumber=1 scan=1057	4.5644
00694:2	79	R.SLSN[+1540.529]STAR.N	HexNAc(2)Hex(7)	N[+1541]	1188.48	2	2375.95	2375.96	0	-0.9	117	Specific	247.4	20.4	20.4	4.17	5	>sp|P50454|SERPH_HUMAN Serpin H1 OS=Homo sapiens OX=9606 GN=SERPINH1 PE=1 SV=2	16343	20210911_zy_cell_scehcd_1.759.759.2	controllerType=0 controllerNumber=1 scan=759	3.29
03271:3	257	R.LLEN[+1565.560]KSN[+349.137]NTK.I	HexNAc(3)Hex(5)Fuc(1),HexNAc(1)Fuc(1)	N[+349][+1566]	1025.77	3	3075.31	3075.32	0	-5.2	233	Specific	247.67	135.54	135.54	0.96	1	>sp|Q6R2W3|SCND3_HUMAN SCAN domain-containing protein 3 OS=Homo sapiens OX=9606 GN=ZBED9 PE=2 SV=1	13597	20210911_zy_cell_scehcd_1.3569.3569.3	controllerType=0 controllerNumber=1 scan=3569	15.501
02858:2	36	K.N[+1702.581]ITIVTGAPR.H	HexNAc(2)Hex(8)	N[+1703]	1372.6	2	2744.19	2744.19	0	0.2	265	Specific	248.01	128.71	128.71	4.67	12	>sp|P26006|ITA3_HUMAN Integrin alpha-3 OS=Homo sapiens OX=9606 GN=ITGA3 PE=1 SV=5	6507	20210911_zy_cell_scehcd_1.3119.3119.2	controllerType=0 controllerNumber=1 scan=3119	13.5379
09312:3	81	K.HLN[+1540.529]ASNPTEPATIIFTAAR.E	HexNAc(2)Hex(7)	N[+1541]	1188.86	3	3564.58	3564.58	0	-1.2	284	Specific	248.24	248.24	248.24	6.49	2	>sp|Q8NFQ8|TOIP2_HUMAN Torsin-1A-interacting protein 2 OS=Homo sapiens OX=9606 GN=TOR1AIP2 PE=1 SV=1	14511	20210911_zy_cell_scehcd_1.10193.10193.3	controllerType=0 controllerNumber=1 scan=10193	44.1047
06100:3	110	R.LSAVNSIFLSHN[+2059.735]NTK.E	HexNAc(4)Hex(5)Fuc(1)NeuAc(1)	N[+2060]	1235.54	3	3704.6	3704.61	0	-1.1	442	Specific	248.55	45.76	45.76	4.56	4	>sp|P48960|CD97_HUMAN CD97 antigen OS=Homo sapiens OX=9606 GN=CD97 PE=1 SV=4	8146	20210911_zy_cell_scehcd_1.6656.6656.3	controllerType=0 controllerNumber=1 scan=6656	28.8758
04578:3	149	R.DMN[+1702.581]QTLGDNITVK.M	HexNAc(2)Hex(8)	N[+1703]	1051.1	3	3151.28	3151.29	0	-1.3	147	Specific	248.97	92.05	28.17	4.77	3	>sp|Q8TCT8|SPP2A_HUMAN Signal peptide peptidase-like 2A OS=Homo sapiens OX=9606 GN=SPPL2A PE=1 SV=2	16730	20210911_zy_cell_scehcd_1.4995.4995.3	controllerType=0 controllerNumber=1 scan=4995	21.681
07070:3	200	K.LN[+1864.634]DTYVNVGLYSTK.T	HexNAc(2)Hex(9)	N[+1865]	1151.15	3	3451.44	3451.44	0	-1	124	Specific	249.04	132.73	132.73	4.79	1	>sp|O14524|NEMP1_HUMAN Nuclear envelope integral membrane protein 1 OS=Homo sapiens OX=9606 GN=NEMP1 PE=1 SV=2	11780	20210911_zy_cell_scehcd_1.7716.7716.3	controllerType=0 controllerNumber=1 scan=7716	33.4612
08868:3	141	R.YC[+57.021]NLEGPPIN[+2026.687]SSVFK.E	HexNAc(2)Hex(10)	C[+57], N[+2027]	1251.18	3	3751.51	3751.52	0	-2	120	Specific	249.61	123.1	123.1	4.58	2	>sp|Q17RY6|LY6K_HUMAN Lymphocyte antigen 6K OS=Homo sapiens OX=9606 GN=LY6K PE=1 SV=2	6814	20210911_zy_cell_scehcd_1.9699.9699.3	controllerType=0 controllerNumber=1 scan=9699	41.996
02904:2	107	R.N[+1702.581]LSFMAR.F	HexNAc(2)Hex(8)	N[+1703]	1271	2	2541	2541.01	0	-1.4	539	Specific	249.63	102.39	102.39	4.56	3	>sp|Q9Y6A1|POMT1_HUMAN Protein O-mannosyl-transferase 1 OS=Homo sapiens OX=9606 GN=POMT1 PE=1 SV=3	10077	20210911_zy_cell_scehcd_1.3169.3169.2	controllerType=0 controllerNumber=1 scan=3169	13.7587
02494:3	1	R.VQPFN[+1540.529]VTQGK.Y	HexNAc(2)Hex(7)	N[+1541]	886.712	3	2658.12	2658.13	0	-2.3	352	Specific	251.09	129.61	129.61	4.75	36	>sp|P13473|LAMP2_HUMAN Lysosome-associated membrane glycoprotein 2 OS=Homo sapiens OX=9606 GN=LAMP2 PE=1 SV=2	6694	20210911_zy_cell_scehcd_1.2721.2721.3	controllerType=0 controllerNumber=1 scan=2721	11.8021
02793:2	97	R.VYWN[+1872.651]R.S	HexNAc(3)Hex(6)NeuAc(1)	N[+1873]	1305.51	2	2610.02	2610.02	0	-0.8	704	Specific	251.31	1.2	1.2	3.17	9	>sp|Q7Z388|D19L4_HUMAN Probable C-mannosyltransferase DPY19L4 OS=Homo sapiens OX=9606 GN=DPY19L4 PE=1 SV=1	3670	20210911_zy_cell_scehcd_1.3048.3048.2	controllerType=0 controllerNumber=1 scan=3048	13.2234
03393:3	3	R.THN[+2018.708]LTDLSPHLR.Y	HexNAc(3)Hex(6)Fuc(1)NeuAc(1)	N[+2019]	1141.48	3	3422.44	3422.45	0	-3.1	977	Specific	251.43	55.66	55.66	4.3	29	>sp|P32004|L1CAM_HUMAN Neural cell adhesion molecule L1 OS=Homo sapiens OX=9606 GN=L1CAM PE=1 SV=2	3537	20210911_zy_cell_scehcd_1.3702.3702.3	controllerType=0 controllerNumber=1 scan=3702	16.0724
00067:2	79	R.SLSN[+1864.634]STAR.N	HexNAc(2)Hex(9)	N[+1865]	1350.53	2	2700.06	2700.06	0	-0.8	117	Specific	251.83	54.44	54.44	4.92	5	>sp|P50454|SERPH_HUMAN Serpin H1 OS=Homo sapiens OX=9606 GN=SERPINH1 PE=1 SV=2	16343	20210911_zy_cell_scehcd_1.75.75.2	controllerType=0 controllerNumber=1 scan=75	0.3205
01292:3	26	K.HTNM[+15.995]N[+1378.476]LTQLK.V	HexNAc(2)Hex(6)	M[+16], N[+1378]	865.366	3	2594.08	2594.09	0	-3.1	250	Specific	252.05	70.72	70.72	4.6	11	>sp|Q15165|PON2_HUMAN Serum paraoxonase/arylesterase 2 OS=Homo sapiens OX=9606 GN=PON2 PE=1 SV=4	9244	20210911_zy_cell_scehcd_1.1410.1410.2	controllerType=0 controllerNumber=1 scan=1410	6.1003
06271:3	133	R.GNRN[+1702.581]RTGSTSSSSSGK.K	HexNAc(2)Hex(8)	N[+1703]	1095.78	3	3285.33	3285.33	0	-0.4	153	Specific	252.32	233.36	233.36	5.01	3	>sp|O00423|EMAL1_HUMAN Echinoderm microtubule-associated protein-like 1 OS=Homo sapiens OX=9606 GN=EML1 PE=1 SV=3	19429	20210911_zy_cell_scehcd_1.6842.6842.3	controllerType=0 controllerNumber=1 scan=6842	29.6833
03073:3	149	R.DM[+15.995]N[+1702.581]QTLGDNITVK.M	HexNAc(2)Hex(8)	M[+16], N[+1703]	1056.43	3	3167.28	3167.28	0	-1.9	147	Specific	252.35	193.79	35.22	4.9	3	>sp|Q8TCT8|SPP2A_HUMAN Signal peptide peptidase-like 2A OS=Homo sapiens OX=9606 GN=SPPL2A PE=1 SV=2	16730	20210911_zy_cell_scehcd_1.3353.3353.3	controllerType=0 controllerNumber=1 scan=3353	14.5616
00243:2	20	K.LIDNN[+1702.581]K.T	HexNAc(2)Hex(8)	N[+1703]	1209.99	2	2418.97	2418.98	0	-0.6	328	Specific	252.88	90.93	90.93	4.37	16	>sp|P07602|SAP_HUMAN Prosaposin OS=Homo sapiens OX=9606 GN=PSAP PE=1 SV=2	14314	20210911_zy_cell_scehcd_1.267.267.2	controllerType=0 controllerNumber=1 scan=267	1.1538
09266:3	81	K.HLN[+1540.529]ASNPTEPATIIFTAAR.E	HexNAc(2)Hex(7)	N[+1541]	1188.86	3	3564.57	3564.58	0	-4.2	284	Specific	253.83	253.83	253.83	5.52	2	>sp|Q8NFQ8|TOIP2_HUMAN Torsin-1A-interacting protein 2 OS=Homo sapiens OX=9606 GN=TOR1AIP2 PE=1 SV=1	14511	20210911_zy_cell_scehcd_1.10142.10142.3	controllerType=0 controllerNumber=1 scan=10142	43.8866
03023:3	6	R.N[+1702.581]ISGVVLADHSGAFHNK.Y	HexNAc(2)Hex(8)	N[+1703]	1156.83	3	3468.47	3468.48	0	-3	435	Specific	253.85	30.66	30.66	4.58	14	>sp|Q92542|NICA_HUMAN Nicastrin OS=Homo sapiens OX=9606 GN=NCSTN PE=1 SV=2	7240	20210911_zy_cell_scehcd_1.3299.3299.3	controllerType=0 controllerNumber=1 scan=3299	14.3246
00909:2	27	K.HLN[+1702.581]GTITAK.Y	HexNAc(2)Hex(8)	N[+1703]	1329.06	2	2657.11	2657.12	0	-1.5	245	Specific	254.23	158.59	158.59	5.65	12	>sp|Q6YHK3|CD109_HUMAN CD109 antigen OS=Homo sapiens OX=9606 GN=CD109 PE=1 SV=2	8627	20210911_zy_cell_scehcd_1.993.993.2	controllerType=0 controllerNumber=1 scan=993	4.2845
07988:3	120	K.N[+1702.581]LTVC[+57.021]PDGALFEQK.G	HexNAc(2)Hex(8)	C[+57], N[+1703]	1098.79	3	3294.35	3294.36	0	-2	124	Specific	254.24	128.16	128.16	4.74	5	>sp|P54709|AT1B3_HUMAN Sodium/potassium-transporting ATPase subunit beta-3 OS=Homo sapiens OX=9606 GN=ATP1B3 PE=1 SV=1	20415	20210911_zy_cell_scehcd_1.8722.8722.2	controllerType=0 controllerNumber=1 scan=8722	37.8189
06319:3	133	R.GNRN[+1864.634]RTGSTSSSSSGK.K	HexNAc(2)Hex(9)	N[+1865]	1149.8	3	3447.39	3447.39	0	0.5	153	Specific	254.25	197.48	197.48	4.49	3	>sp|O00423|EMAL1_HUMAN Echinoderm microtubule-associated protein-like 1 OS=Homo sapiens OX=9606 GN=EML1 PE=1 SV=3	19429	20210911_zy_cell_scehcd_1.6895.6895.3	controllerType=0 controllerNumber=1 scan=6895	29.9106
04236:3	38	K.C[+57.021]NM[+15.995]IN[+1864.634]GTDGDSFHPLITK.D	HexNAc(2)Hex(9)	C[+57], M[+16], N[+1865]	1300.86	3	3900.55	3900.56	0	-1.2	245	Specific	254.25	199.32	199.32	6.42	5	>sp|Q14108|SCRB2_HUMAN Lysosome membrane protein 2 OS=Homo sapiens OX=9606 GN=SCARB2 PE=1 SV=2	18342	20210911_zy_cell_scehcd_1.4622.4622.3	controllerType=0 controllerNumber=1 scan=4622	20.0659
05539:2	28	K.QNNGAFN[+1378.476]ETLFR.N	HexNAc(2)Hex(6)	N[+1378]	1395.08	2	2789.15	2789.15	0	-1	721	Specific	254.46	50.45	50.45	3.82	8	>sp|P02786|TFR1_HUMAN Transferrin receptor protein 1 OS=Homo sapiens OX=9606 GN=TFRC PE=1 SV=2	16028	20210911_zy_cell_scehcd_1.6043.6043.3	controllerType=0 controllerNumber=1 scan=6043	26.2233
04506:3	3	R.THN[+2715.963]LTDLSPHLR.Y	HexNAc(5)Hex(6)Fuc(1)NeuAc(2)	N[+2716]	1373.9	3	4119.7	4119.7	0	-0.5	977	Specific	254.72	97.17	97.17	4.98	29	>sp|P32004|L1CAM_HUMAN Neural cell adhesion molecule L1 OS=Homo sapiens OX=9606 GN=L1CAM PE=1 SV=2	3537	20210911_zy_cell_scehcd_1.4916.4916.3	controllerType=0 controllerNumber=1 scan=4916	21.3399
09152:3	20	R.TN[+2026.687]STFVQALVEHVK.E	HexNAc(2)Hex(10)	N[+2027]	1200.51	3	3599.52	3599.53	0	-1.2	214	Specific	254.73	53.97	53.97	5.14	16	>sp|P07602|SAP_HUMAN Prosaposin OS=Homo sapiens OX=9606 GN=PSAP PE=1 SV=2	14314	20210911_zy_cell_scehcd_1.10015.10015.3	controllerType=0 controllerNumber=1 scan=10015	43.3448
02046:2	97	R.VYWN[+1702.581]R.S	HexNAc(2)Hex(8)	N[+1703]	1220.48	2	2439.95	2439.95	0	-0.9	704	Specific	255.17	7.74	7.74	2.38	9	>sp|Q7Z388|D19L4_HUMAN Probable C-mannosyltransferase DPY19L4 OS=Homo sapiens OX=9606 GN=DPY19L4 PE=1 SV=1	3670	20210911_zy_cell_scehcd_1.2233.2233.2	controllerType=0 controllerNumber=1 scan=2233	9.6797
02855:3	71	R.YVQN[+2715.963]GTYTVK.I	HexNAc(5)Hex(6)Fuc(1)NeuAc(2)	N[+2716]	1296.85	3	3888.54	3888.56	0	-3.3	459	Specific	255.44	113.61	113.61	4.6	4	>sp|Q14126|DSG2_HUMAN Desmoglein-2 OS=Homo sapiens OX=9606 GN=DSG2 PE=1 SV=2	1442	20210911_zy_cell_scehcd_1.3115.3115.3	controllerType=0 controllerNumber=1 scan=3115	13.5229
02627:2	118	R.VIYN[+1864.634]LTEK.G	HexNAc(2)Hex(9)	N[+1865]	1422.59	2	2844.18	2844.18	0	0.5	425	Specific	255.45	101.19	101.19	4.48	2	>sp|Q969V3|NCLN_HUMAN Nicalin OS=Homo sapiens OX=9606 GN=NCLN PE=1 SV=2	10863	20210911_zy_cell_scehcd_1.2867.2867.2	controllerType=0 controllerNumber=1 scan=2867	12.435
01431:2	129	R.AFMN[+1768.640]R.T	HexNAc(4)Hex(5)Fuc(1)	N[+1769]	1203.97	2	2406.94	2406.95	0	-2	170	Specific	255.52	121.71	121.71	4.54	7	>sp|Q8WTV0|SCRB1_HUMAN Scavenger receptor class B member 1 OS=Homo sapiens OX=9606 GN=SCARB1 PE=1 SV=1	16447	20210911_zy_cell_scehcd_1.1562.1562.2	controllerType=0 controllerNumber=1 scan=1562	6.7615
01998:2	193	K.AEN[+1403.507]SSLNLIGK.A	HexNAc(3)Hex(4)Fuc(1)	N[+1404]	1275.06	2	2549.12	2549.12	0	-2.4	188	Specific	255.77	68.77	68.77	4.61	3	>sp|P46459|NSF_HUMAN Vesicle-fusing ATPase OS=Homo sapiens OX=9606 GN=NSF PE=1 SV=3	12186	20210911_zy_cell_scehcd_1.2180.2180.3	controllerType=0 controllerNumber=1 scan=2180	9.4508
01131:2	4	R.N[+2204.772]VTR.L	HexNAc(4)Hex(5)NeuAc(2)	N[+2205]	1347.53	2	2694.05	2694.05	0	-1.6	269	Specific	256.22	2.24	2.24	3.37	27	>sp|P05556|ITB1_HUMAN Integrin beta-1 OS=Homo sapiens OX=9606 GN=ITGB1 PE=1 SV=2	3061	20210911_zy_cell_scehcd_1.1235.1235.2	controllerType=0 controllerNumber=1 scan=1235	5.3383
09321:3	81	K.HLN[+1702.581]ASNPTEPATIIFTAAR.E	HexNAc(2)Hex(8)	N[+1703]	1242.88	3	3726.63	3726.64	0	-1.7	284	Specific	256.36	256.36	256.36	6.68	2	>sp|Q8NFQ8|TOIP2_HUMAN Torsin-1A-interacting protein 2 OS=Homo sapiens OX=9606 GN=TOR1AIP2 PE=1 SV=1	14511	20210911_zy_cell_scehcd_1.10203.10203.3	controllerType=0 controllerNumber=1 scan=10203	44.1472
03553:2	2	R.LLNINPN[+1710.598]K.T	HexNAc(3)Hex(5)NeuAc(1)	N[+1711]	1318.58	2	2636.14	2636.14	0	-0.5	255	Specific	256.53	203.47	203.47	5.73	55	>sp|P11279|LAMP1_HUMAN Lysosome-associated membrane glycoprotein 1 OS=Homo sapiens OX=9606 GN=LAMP1 PE=1 SV=3	4405	20210911_zy_cell_scehcd_1.3877.3877.2	controllerType=0 controllerNumber=1 scan=3877	16.8313
01697:2	204	K.LLHAYN[+1872.651]R.T	HexNAc(3)Hex(6)NeuAc(1)	N[+1873]	1380.07	2	2759.14	2759.14	0	0.4	119	Specific	256.59	11.2	11.2	0.56	3	>sp|Q13214|SEM3B_HUMAN Semaphorin-3B OS=Homo sapiens OX=9606 GN=SEMA3B PE=2 SV=1	16209	20210911_zy_cell_scehcd_1.1852.1852.2	controllerType=0 controllerNumber=1 scan=1852	8.0237
07990:3	120	K.N[+1702.581]LTVC[+57.021]PDGALFEQK.G	HexNAc(2)Hex(8)	C[+57], N[+1703]	1098.79	3	3294.35	3294.36	0	-1.7	124	Specific	256.65	256.65	256.65	5.55	5	>sp|P54709|AT1B3_HUMAN Sodium/potassium-transporting ATPase subunit beta-3 OS=Homo sapiens OX=9606 GN=ATP1B3 PE=1 SV=1	20415	20210911_zy_cell_scehcd_1.8725.8725.3	controllerType=0 controllerNumber=1 scan=8725	37.8291
03594:3	112	R.VN[+2188.740]ASTTEPN[+568.212]STVEQSALMR.D	HexNAc(2)Hex(11),HexNAc(2)Hex(1)	N[+568][+2189]	1597.97	3	4791.91	4791.93	0	-3.7	1335	Specific	256.96	214.46	0	5.16	5	>sp|P07942|LAMB1_HUMAN Laminin subunit beta-1 OS=Homo sapiens OX=9606 GN=LAMB1 PE=1 SV=2	4645	20210911_zy_cell_scehcd_1.3921.3921.3	controllerType=0 controllerNumber=1 scan=3921	17.0249
02980:2	89	K.VWC[+57.021]LGN[+1702.581]ETR.Y	HexNAc(2)Hex(8)	C[+57], N[+1703]	1419.06	2	2837.11	2837.12	0	-1.7	815	Specific	257.18	107	107	5.62	3	>sp|Q9Y6N7|ROBO1_HUMAN Roundabout homolog 1 OS=Homo sapiens OX=9606 GN=ROBO1 PE=1 SV=1	10511	20210911_zy_cell_scehcd_1.3252.3252.2	controllerType=0 controllerNumber=1 scan=3252	14.1208
13549:3	7	R.N[+2204.772]GSSIVDLSPLIHR.T	HexNAc(4)Hex(5)NeuAc(2)	N[+2205]	1238.2	3	3712.59	3712.6	0	-1.2	1656	Specific	257.66	254.55	254.55	6.03	21	>sp|P11717|MPRI_HUMAN Cation-independent mannose-6-phosphate receptor OS=Homo sapiens OX=9606 GN=IGF2R PE=1 SV=3	12317	20210911_zy_cell_scehcd_1.15689.15689.3	controllerType=0 controllerNumber=1 scan=15689	65.8205
07556:3	13	K.TC[+57.021]PAGVMGEN[+1702.581]NTLVWK.Y	HexNAc(2)Hex(8)	C[+57], N[+1703]	1160.48	3	3479.41	3479.42	0	-3.2	594	Specific	257.9	143.16	143.16	5.22	16	>sp|P00533|EGFR_HUMAN Epidermal growth factor receptor OS=Homo sapiens OX=9606 GN=EGFR PE=1 SV=2	19596	20210911_zy_cell_scehcd_1.8249.8249.3	controllerType=0 controllerNumber=1 scan=8249	35.772
03400:2	2	R.LLNINPN[+1913.677]K.T	HexNAc(4)Hex(5)NeuAc(1)	N[+1914]	1420.11	2	2839.22	2839.22	0	-0.5	255	Specific	258.28	134.82	134.82	5.6	55	>sp|P11279|LAMP1_HUMAN Lysosome-associated membrane glycoprotein 1 OS=Homo sapiens OX=9606 GN=LAMP1 PE=1 SV=3	4405	20210911_zy_cell_scehcd_1.3710.3710.2	controllerType=0 controllerNumber=1 scan=3710	16.1062
00309:3	7	R.YHN[+1702.581]QTLR.Y	HexNAc(2)Hex(8)	N[+1703]	878.688	3	2634.05	2634.06	0	-2	398	Specific	258.57	41.03	41.03	3.62	21	>sp|P11717|MPRI_HUMAN Cation-independent mannose-6-phosphate receptor OS=Homo sapiens OX=9606 GN=IGF2R PE=1 SV=3	12317	20210911_zy_cell_scehcd_1.339.339.3	controllerType=0 controllerNumber=1 scan=339	1.4663
04950:3	69	K.SDAVSHTGN[+1540.529]YTC[+57.021]EVTELTR.E	HexNAc(2)Hex(7)	C[+57], N[+1541]	1227.5	3	3680.48	3680.49	0	-2.2	103	Specific	258.62	173.19	173.19	5.98	4	>sp|Q08722|CD47_HUMAN Leukocyte surface antigen CD47 OS=Homo sapiens OX=9606 GN=CD47 PE=1 SV=1	886	20210911_zy_cell_scehcd_1.5401.5401.3	controllerType=0 controllerNumber=1 scan=5401	23.4397
06719:3	103	R.LAN[+1864.634]LTQGEDQYYLR.V	HexNAc(2)Hex(9)	N[+1865]	1183.49	3	3548.46	3548.47	0	-2.8	372	Specific	259.9	259.9	259.9	4.97	5	>sp|P10909|CLUS_HUMAN Clusterin OS=Homo sapiens OX=9606 GN=CLU PE=1 SV=1	6125	20210911_zy_cell_scehcd_1.7332.7332.3	controllerType=0 controllerNumber=1 scan=7332	31.8015
01253:2	145	R.YPAN[+1702.581]C[+57.021]TVR.D	HexNAc(2)Hex(8)	C[+57], N[+1703]	1342.02	2	2683.04	2683.04	0	-1.6	154	Specific	260.31	81.1	81.1	5.59	2	>sp|Q9BRN9|TM2D3_HUMAN TM2 domain-containing protein 3 OS=Homo sapiens OX=9606 GN=TM2D3 PE=2 SV=2	3267	20210911_zy_cell_scehcd_1.1368.1368.2	controllerType=0 controllerNumber=1 scan=1368	5.9175
01187:2	129	R.AFM[+15.995]N[+2059.735]R.T	HexNAc(4)Hex(5)Fuc(1)NeuAc(1)	M[+16], N[+2060]	1357.52	2	2714.04	2714.04	0	-0.9	170	Specific	260.56	77.92	77.92	4.31	7	>sp|Q8WTV0|SCRB1_HUMAN Scavenger receptor class B member 1 OS=Homo sapiens OX=9606 GN=SCARB1 PE=1 SV=1	16447	20210911_zy_cell_scehcd_1.1296.1296.2	controllerType=0 controllerNumber=1 scan=1296	5.6042
02979:2	139	K.SN[+1872.651]LTVLR.E	HexNAc(3)Hex(6)NeuAc(1)	N[+1873]	1338.07	2	2675.13	2675.13	0	-1	704	Specific	260.75	16.12	16.12	3.37	5	>sp|P18084|ITB5_HUMAN Integrin beta-5 OS=Homo sapiens OX=9606 GN=ITGB5 PE=1 SV=1	11995	20210911_zy_cell_scehcd_1.3251.3251.2	controllerType=0 controllerNumber=1 scan=3251	14.1156
01748:3	7	K.GYPC[+57.021]GGN[+2350.830]K.T	HexNAc(4)Hex(5)Fuc(1)NeuAc(2)	C[+57], N[+2351]	1068.4	3	3203.19	3203.2	0	-1.5	2079	Specific	261.27	105.48	105.48	5.12	21	>sp|P11717|MPRI_HUMAN Cation-independent mannose-6-phosphate receptor OS=Homo sapiens OX=9606 GN=IGF2R PE=1 SV=3	12317	20210911_zy_cell_scehcd_1.1908.1908.3	controllerType=0 controllerNumber=1 scan=1908	8.2674
05412:3	88	K.QPVSPVIHPPVSYN[+1702.581]DTAPR.I	HexNAc(2)Hex(8)	N[+1703]	1259.55	3	3776.65	3776.65	0	-1	248	Specific	261.38	234.13	234.13	5.76	4	>sp|Q15904|VAS1_HUMAN V-type proton ATPase subunit S1 OS=Homo sapiens OX=9606 GN=ATP6AP1 PE=1 SV=2	13411	20210911_zy_cell_scehcd_1.5905.5905.3	controllerType=0 controllerNumber=1 scan=5905	25.6235
03499:3	114	K.NPVGLIGAEN[+1378.476]ATGETDPSHSK.F	HexNAc(2)Hex(6)	N[+1378]	1158.16	3	3472.48	3472.49	0	-1.8	340	Specific	261.49	257.87	257.87	6.24	2	>sp|P43251|BTD_HUMAN Biotinidase OS=Homo sapiens OX=9606 GN=BTD PE=1 SV=2	2991	20210911_zy_cell_scehcd_1.3818.3818.3	controllerType=0 controllerNumber=1 scan=3818	16.5758
01107:2	13	R.N[+2350.830]VSR.G	HexNAc(4)Hex(5)Fuc(1)NeuAc(2)	N[+2351]	1413.55	2	2826.09	2826.09	0	-1.2	528	Specific	261.49	41.7	41.7	4.17	16	>sp|P00533|EGFR_HUMAN Epidermal growth factor receptor OS=Homo sapiens OX=9606 GN=EGFR PE=1 SV=2	19596	20210911_zy_cell_scehcd_1.1209.1209.2	controllerType=0 controllerNumber=1 scan=1209	5.2236
02066:3	43	K.YHVLHIN[+1872.651]TTK.N	HexNAc(3)Hex(6)NeuAc(1)	N[+1873]	1033.44	3	3098.31	3098.32	0	-1.5	102	Specific	261.66	221.46	221.46	5.97	3	>sp|Q7LGA3|HS2ST_HUMAN Heparan sulfate 2-O-sulfotransferase 1 OS=Homo sapiens OX=9606 GN=HS2ST1 PE=1 SV=1	4219	20210911_zy_cell_scehcd_1.2255.2255.3	controllerType=0 controllerNumber=1 scan=2255	9.7739
14135:3	167	R.GDTLC[+57.021]TN[+2350.830]LTGTLLPSR.N	HexNAc(4)Hex(5)Fuc(1)NeuAc(2)	C[+57], N[+2351]	1356.91	3	4068.7	4069.7	-1	0.2	164	Specific	261.66	160.41	160.41	4.89	3	>sp|P32970|CD70_HUMAN CD70 antigen OS=Homo sapiens OX=9606 GN=CD70 PE=1 SV=2	6852	20210911_zy_cell_scehcd_1.16451.16451.3	controllerType=0 controllerNumber=1 scan=16451	68.7719
03231:3	2	R.GHTLTLN[+2188.740]FTR.N	HexNAc(2)Hex(11)	N[+2189]	1116.79	3	3348.36	3348.36	0	-1.6	97	Specific	261.82	233.66	233.66	6.17	55	>sp|P11279|LAMP1_HUMAN Lysosome-associated membrane glycoprotein 1 OS=Homo sapiens OX=9606 GN=LAMP1 PE=1 SV=3	4405	20210911_zy_cell_scehcd_1.3526.3526.3	controllerType=0 controllerNumber=1 scan=3526	15.3118
00717:2	20	K.LIDNN[+1540.529]K.T	HexNAc(2)Hex(7)	N[+1541]	1128.96	2	2256.91	2256.92	0	-3.6	328	Specific	262.25	93.58	93.58	3.6	16	>sp|P07602|SAP_HUMAN Prosaposin OS=Homo sapiens OX=9606 GN=PSAP PE=1 SV=2	14314	20210911_zy_cell_scehcd_1.784.784.2	controllerType=0 controllerNumber=1 scan=784	3.3994
05081:3	242	R.NRIAAAENNGN[+1913.677]ESGVR.E	HexNAc(4)Hex(5)NeuAc(1)	N[+1914]	1195.83	3	3585.48	3585.49	0	-3.4	150	Specific	262.35	38.67	38.67	0.98	1	>sp|Q9BYX4|IFIH1_HUMAN Interferon-induced helicase C domain-containing protein 1 OS=Homo sapiens OX=9606 GN=IFIH1 PE=1 SV=3	6097	20210911_zy_cell_scehcd_1.5544.5544.3	controllerType=0 controllerNumber=1 scan=5544	24.0587
01140:3	4	K.C[+57.021]HEGN[+1702.581]GTFEC[+57.021]GAC[+57.021]R.C	HexNAc(2)Hex(8)	C[+57]*3, N[+1703]	1119.74	3	3357.19	3357.2	0	-1.8	477	Specific	262.64	256.52	256.52	5.79	27	>sp|P05556|ITB1_HUMAN Integrin beta-1 OS=Homo sapiens OX=9606 GN=ITGB1 PE=1 SV=2	3061	20210911_zy_cell_scehcd_1.1245.1245.3	controllerType=0 controllerNumber=1 scan=1245	5.3807
02857:2	100	K.N[+1702.581]NTTFLEC[+57.021]APK.S	HexNAc(2)Hex(8)	C[+57], N[+1703]	1499.1	2	2997.19	2997.19	0	-1.3	585	Specific	262.87	225.71	10.12	6.17	3	>sp|Q99985|SEM3C_HUMAN Semaphorin-3C OS=Homo sapiens OX=9606 GN=SEMA3C PE=2 SV=2	14838	20210911_zy_cell_scehcd_1.3118.3118.2	controllerType=0 controllerNumber=1 scan=3118	13.5332
01604:3	8	K.NN[+2864.036]HTASILDR.M	HexNAc(7)Hex(8)Fuc(1)	N[+2864]	1335.54	3	4004.6	4004.61	0	-1.9	129	Specific	263.16	60.21	60.21	5.1	19	>sp|P08962|CD63_HUMAN CD63 antigen OS=Homo sapiens OX=9606 GN=CD63 PE=1 SV=2	5151	20210911_zy_cell_scehcd_1.1751.1751.3	controllerType=0 controllerNumber=1 scan=1751	7.5823
08213:3	23	R.N[+1864.634]C[+57.021]SAAPQPEPAAGLASYPELR.L	HexNAc(2)Hex(9)	C[+57], N[+1865]	1355.23	3	4063.68	4063.68	0	-2.1	87	Specific	263.49	263.49	263.49	5.75	4	>sp|O75718|CRTAP_HUMAN Cartilage-associated protein OS=Homo sapiens OX=9606 GN=CRTAP PE=1 SV=1	8728	20210911_zy_cell_scehcd_1.8970.8970.3	controllerType=0 controllerNumber=1 scan=8970	38.8849
04180:2	69	K.GRDIYTFDGALN[+1540.529]K.S	HexNAc(2)Hex(7)	N[+1541]	1505.64	2	3010.26	3010.27	0	-0.9	62	Specific	264	133.58	133.58	3.68	4	>sp|Q08722|CD47_HUMAN Leukocyte surface antigen CD47 OS=Homo sapiens OX=9606 GN=CD47 PE=1 SV=1	886	20210911_zy_cell_scehcd_1.4561.4561.2	controllerType=0 controllerNumber=1 scan=4561	19.8004
01637:2	82	R.FN[+1864.634]LSK.N	HexNAc(2)Hex(9)	N[+1865]	1236.99	2	2472.97	2472.97	0	-3.1	92	Specific	264.34	78.82	78.82	3.79	2	>sp|Q14738|2A5D_HUMAN Serine/threonine-protein phosphatase 2A 56 kDa regulatory subunit delta isoform OS=Homo sapiens OX=9606 GN=PPP2R5D PE=1 SV=1	20182	20210911_zy_cell_scehcd_1.1787.1787.2	controllerType=0 controllerNumber=1 scan=1787	7.7389
02730:2	152	R.YVWN[+1872.651]R.T	HexNAc(3)Hex(6)NeuAc(1)	N[+1873]	1305.52	2	2610.02	2610.02	0	0.2	268	Specific	265.08	0	0	2.72	4	>sp|P05187|PPB1_HUMAN Alkaline phosphatase, placental type OS=Homo sapiens OX=9606 GN=ALPP PE=1 SV=2	14207	20210911_zy_cell_scehcd_1.2979.2979.2	controllerType=0 controllerNumber=1 scan=2979	12.9243
02730:2	97	R.VYWN[+1872.651]R.S	HexNAc(3)Hex(6)NeuAc(1)	N[+1873]	1305.52	2	2610.02	2610.02	0	0.2	704	Specific	265.08	0	0	2.72	9	>sp|Q7Z388|D19L4_HUMAN Probable C-mannosyltransferase DPY19L4 OS=Homo sapiens OX=9606 GN=DPY19L4 PE=1 SV=1	3670	20210911_zy_cell_scehcd_1.2979.2979.2	controllerType=0 controllerNumber=1 scan=2979	12.9243
05943:3	154	K.TSGN[+2026.687]FTIDPDGSGPLK.P	HexNAc(2)Hex(10)	N[+2027]	1211.49	3	3632.46	3632.46	0	0.4	594	Specific	265.86	156.14	156.14	5.02	2	>sp|P78357|CNTP1_HUMAN Contactin-associated protein 1 OS=Homo sapiens OX=9606 GN=CNTNAP1 PE=1 SV=1	341	20210911_zy_cell_scehcd_1.6484.6484.3	controllerType=0 controllerNumber=1 scan=6484	28.1332
02626:3	14	R.IAPASN[+1702.581]VSHTVVLR.P	HexNAc(2)Hex(8)	N[+1703]	1056.14	3	3166.41	3166.41	0	-1.2	83	Specific	265.9	265.9	265.9	6.03	7	>sp|P43308|SSRB_HUMAN Translocon-associated protein subunit beta OS=Homo sapiens OX=9606 GN=SSR2 PE=1 SV=1	13071	20210911_zy_cell_scehcd_1.2865.2865.3	controllerType=0 controllerNumber=1 scan=2865	12.4294
02429:3	56	R.DN[+1702.581]ATLQATLHAAR.D	HexNAc(2)Hex(8)	N[+1703]	1028.77	3	3084.29	3084.3	0	-2	2422	Specific	266	266	266	5.79	4	>sp|O15230|LAMA5_HUMAN Laminin subunit alpha-5 OS=Homo sapiens OX=9606 GN=LAMA5 PE=1 SV=8	2334	20210911_zy_cell_scehcd_1.2651.2651.3	controllerType=0 controllerNumber=1 scan=2651	11.4939
03468:3	3	R.THN[+1913.677]LTDLSPHLR.Y	HexNAc(4)Hex(5)NeuAc(1)	N[+1914]	1106.47	3	3317.4	3317.42	0	-4.1	977	Specific	266.4	89.65	89.65	4.23	29	>sp|P32004|L1CAM_HUMAN Neural cell adhesion molecule L1 OS=Homo sapiens OX=9606 GN=L1CAM PE=1 SV=2	3537	20210911_zy_cell_scehcd_1.3784.3784.3	controllerType=0 controllerNumber=1 scan=3784	16.4283
01560:2	86	K.N[+1702.581]FTMNEK.L	HexNAc(2)Hex(8)	N[+1703]	1293.49	2	2585.97	2585.98	0	-2.1	203	Specific	266.69	84.81	84.81	4.52	4	>sp|Q92820|GGH_HUMAN Gamma-glutamyl hydrolase OS=Homo sapiens OX=9606 GN=GGH PE=1 SV=2	3562	20210911_zy_cell_scehcd_1.1703.1703.2	controllerType=0 controllerNumber=1 scan=1703	7.3733
04995:3	3	R.THN[+2204.772]LTDLSPHLR.Y	HexNAc(4)Hex(5)NeuAc(2)	N[+2205]	1203.51	3	3608.51	3608.51	0	-1.5	977	Specific	266.81	135.13	135.13	5.46	29	>sp|P32004|L1CAM_HUMAN Neural cell adhesion molecule L1 OS=Homo sapiens OX=9606 GN=L1CAM PE=1 SV=2	3537	20210911_zy_cell_scehcd_1.5450.5450.3	controllerType=0 controllerNumber=1 scan=5450	23.6524
03894:2	115	K.GEYFVN[+1540.529]VTTR.I	HexNAc(2)Hex(7)	N[+1541]	1363.56	2	2726.12	2726.12	0	-0.7	1069	Specific	267.18	103.21	103.21	5.36	2	>sp|P17301|ITA2_HUMAN Integrin alpha-2 OS=Homo sapiens OX=9606 GN=ITGA2 PE=1 SV=1	3912	20210911_zy_cell_scehcd_1.4249.4249.2	controllerType=0 controllerNumber=1 scan=4249	18.4464
01434:2	147	K.AN[+1702.581]ATIEVK.A	HexNAc(2)Hex(8)	N[+1703]	1274.53	2	2548.05	2548.05	0	-1.4	228	Specific	267.18	43.65	43.65	4.89	2	>sp|Q9Y639|NPTN_HUMAN Neuroplastin OS=Homo sapiens OX=9606 GN=NPTN PE=1 SV=2	14763	20210911_zy_cell_scehcd_1.1565.1565.2	controllerType=0 controllerNumber=1 scan=1565	6.7753
01635:2	192	K.DAVNN[+1702.581]ITAK.G	HexNAc(2)Hex(8)	N[+1703]	1324.54	2	2648.08	2648.08	0	-0.3	320	Specific	267.91	115.22	115.22	5.38	2	>sp|P54289|CA2D1_HUMAN Voltage-dependent calcium channel subunit alpha-2/delta-1 OS=Homo sapiens OX=9606 GN=CACNA2D1 PE=1 SV=3	20369	20210911_zy_cell_scehcd_1.1785.1785.2	controllerType=0 controllerNumber=1 scan=1785	7.729
04083:2	125	R.YN[+1702.581]GTVGLWR.R	HexNAc(2)Hex(8)	N[+1703]	1384.57	2	2768.12	2768.13	0	-1.6	71	Specific	267.91	120.19	120.19	5.62	2	>sp|Q9NY35|CLDN1_HUMAN Claudin domain-containing protein 1 OS=Homo sapiens OX=9606 GN=CLDND1 PE=1 SV=1	2194	20210911_zy_cell_scehcd_1.4455.4455.2	controllerType=0 controllerNumber=1 scan=4455	19.3416
02656:2	189	R.N[+1540.529]TSWDNAGFK.G	HexNAc(2)Hex(7)	N[+1541]	1340.52	2	2680.04	2680.04	0	-0.4	264	Specific	268.56	173.06	173.06	5.53	1	>sp|P78536|ADA17_HUMAN Disintegrin and metalloproteinase domain-containing protein 17 OS=Homo sapiens OX=9606 GN=ADAM17 PE=1 SV=1	606	20210911_zy_cell_scehcd_1.2898.2898.2	controllerType=0 controllerNumber=1 scan=2898	12.5723
01591:2	147	K.AN[+1622.582]ATIEVK.A	HexNAc(4)Hex(5)	N[+1623]	1234.53	2	2468.05	2468.05	0	-2.3	228	Specific	269.38	64.29	64.29	5.1	2	>sp|Q9Y639|NPTN_HUMAN Neuroplastin OS=Homo sapiens OX=9606 GN=NPTN PE=1 SV=2	14763	20210911_zy_cell_scehcd_1.1737.1737.2	controllerType=0 controllerNumber=1 scan=1737	7.5203
01371:3	213	K.EHYLSSVN[+1702.581]K.T	HexNAc(2)Hex(8)	N[+1703]	927.042	3	2779.11	2779.12	0	-2.7	156	Specific	269.43	69.41	69.41	2.38	1	>sp|O75051|PLXA2_HUMAN Plexin-A2 OS=Homo sapiens OX=9606 GN=PLXNA2 PE=1 SV=4	17774	20210911_zy_cell_scehcd_1.1497.1497.3	controllerType=0 controllerNumber=1 scan=1497	6.4765
08223:3	105	R.TALWVATDHNMDN[+1702.581]TSTVLR.E	HexNAc(2)Hex(8)	N[+1703]	1283.21	3	3847.62	3847.62	0	-1.2	84	Specific	269.63	223.62	223.62	6.62	2	>sp|Q8NBJ5|GT251_HUMAN Procollagen galactosyltransferase 1 OS=Homo sapiens OX=9606 GN=COLGALT1 PE=1 SV=1	2095	20210911_zy_cell_scehcd_1.8981.8981.3	controllerType=0 controllerNumber=1 scan=8981	38.9323
03078:3	34	K.N[+1864.634]VSC[+57.021]LWC[+57.021]NTNK.A	HexNAc(2)Hex(9)	C[+57]*2, N[+1865]	1087.42	3	3260.24	3260.25	0	-2.5	54	Specific	269.74	194.75	194.75	5.25	6	>sp|P53801|PTTG_HUMAN Pituitary tumor-transforming gene 1 protein-interacting protein OS=Homo sapiens OX=9606 GN=PTTG1IP PE=1 SV=1	15135	20210911_zy_cell_scehcd_1.3359.3359.3	controllerType=0 controllerNumber=1 scan=3359	14.5856
03482:2	1	R.VQPFN[+1710.598]VTQGK.Y	HexNAc(3)Hex(5)NeuAc(1)	N[+1711]	1414.6	2	2828.2	2828.2	0	-0.6	352	Specific	269.94	96.92	96.92	5.36	36	>sp|P13473|LAMP2_HUMAN Lysosome-associated membrane glycoprotein 2 OS=Homo sapiens OX=9606 GN=LAMP2 PE=1 SV=2	6694	20210911_zy_cell_scehcd_1.3799.3799.2	controllerType=0 controllerNumber=1 scan=3799	16.4944
02043:2	97	R.VYWN[+2026.687]R.S	HexNAc(2)Hex(10)	N[+2027]	1382.53	2	2764.06	2764.06	0	-0.6	704	Specific	270.08	7.29	7.29	3.23	9	>sp|Q7Z388|D19L4_HUMAN Probable C-mannosyltransferase DPY19L4 OS=Homo sapiens OX=9606 GN=DPY19L4 PE=1 SV=1	3670	20210911_zy_cell_scehcd_1.2230.2230.2	controllerType=0 controllerNumber=1 scan=2230	9.6654
00001:2	79	R.SLSN[+1864.634]STAR.N	HexNAc(2)Hex(9)	N[+1865]	1350.53	2	2700.06	2700.06	0	-1.5	117	Specific	270.23	36.18	36.18	4.89	5	>sp|P50454|SERPH_HUMAN Serpin H1 OS=Homo sapiens OX=9606 GN=SERPINH1 PE=1 SV=2	16343	20210911_zy_cell_scehcd_1.3.3.2	controllerType=0 controllerNumber=1 scan=3	0.0081
04168:3	24	R.N[+1540.529]HSIFLADINQER.G	HexNAc(2)Hex(7)	N[+1541]	1033.11	3	3097.3	3097.31	0	-1.8	197	Specific	271.13	62.85	62.85	4.92	8	>sp|P50897|PPT1_HUMAN Palmitoyl-protein thioesterase 1 OS=Homo sapiens OX=9606 GN=PPT1 PE=1 SV=1	7591	20210911_zy_cell_scehcd_1.4548.4548.3	controllerType=0 controllerNumber=1 scan=4548	19.7437
02210:3	228	R.IEN[+1864.634]YTPDLPR.A	HexNAc(2)Hex(9)	N[+1865]	1028.09	3	3082.25	3082.25	0	-1.5	118	Specific	271.47	22.05	22.05	1.5	1	>sp|P03956|MMP1_HUMAN Interstitial collagenase OS=Homo sapiens OX=9606 GN=MMP1 PE=1 SV=3	4659	20210911_zy_cell_scehcd_1.2412.2412.3	controllerType=0 controllerNumber=1 scan=2412	10.4522
09545:3	41	R.WNDSPC[+57.021]N[+2350.830]QSLPSIC[+57.021]K.K	HexNAc(4)Hex(5)Fuc(1)NeuAc(2)	C[+57]*2, N[+2351]	1386.55	3	4157.62	4156.62	1	-0.9	491	Specific	271.53	140.49	2.48	4.95	11	>sp|Q9UBG0|MRC2_HUMAN C-type mannose receptor 2 OS=Homo sapiens OX=9606 GN=MRC2 PE=1 SV=2	16756	20210911_zy_cell_scehcd_1.10459.10459.3	controllerType=0 controllerNumber=1 scan=10459	45.2191
03221:2	123	R.N[+1702.581]YTLWR.V	HexNAc(2)Hex(8)	N[+1703]	1278.01	2	2555.02	2555.02	0	-0.8	184	Specific	272.24	113.35	113.35	4.53	4	>sp|Q9UBR2|CATZ_HUMAN Cathepsin Z OS=Homo sapiens OX=9606 GN=CTSZ PE=1 SV=1	19942	20210911_zy_cell_scehcd_1.3515.3515.2	controllerType=0 controllerNumber=1 scan=3515	15.2642
00842:2	37	R.AN[+2350.830]R.T	HexNAc(4)Hex(5)Fuc(1)NeuAc(2)	N[+2351]	1356.02	2	2711.03	2711.03	0	1.2	77	Specific	273.3	87.88	87.88	3.38	11	>sp|P23229|ITA6_HUMAN Integrin alpha-6 OS=Homo sapiens OX=9606 GN=ITGA6 PE=1 SV=5	4737	20210911_zy_cell_scehcd_1.920.920.2	controllerType=0 controllerNumber=1 scan=920	3.9712
03926:3	1	K.VASVININPN[+1710.598]TTHSTGSC[+57.021]R.S	HexNAc(3)Hex(5)NeuAc(1)	C[+57], N[+1711]	1246.87	3	3738.59	3738.59	0	-0.6	248	Specific	274.25	258.19	258.19	6.44	36	>sp|P13473|LAMP2_HUMAN Lysosome-associated membrane glycoprotein 2 OS=Homo sapiens OX=9606 GN=LAMP2 PE=1 SV=2	6694	20210911_zy_cell_scehcd_1.4284.4284.3	controllerType=0 controllerNumber=1 scan=4284	18.5979
02032:3	12	R.EAGN[+1581.555]HTSGAGLVQINK.S	HexNAc(3)Hex(6)	N[+1582]	1059.79	3	3177.36	3177.37	0	-2.4	80	Specific	274.37	124.66	43.36	4.96	12	>sp|P20645|MPRD_HUMAN Cation-dependent mannose-6-phosphate receptor OS=Homo sapiens OX=9606 GN=M6PR PE=1 SV=1	11960	20210911_zy_cell_scehcd_1.2218.2218.3	controllerType=0 controllerNumber=1 scan=2218	9.613
02149:3	219	R.HTLLEYLLGEGN[+1378.476]LSR.P	HexNAc(2)Hex(6)	N[+1378]	1031.81	3	3093.4	3093.39	0	5.2	209	Specific	274.83	224.74	224.74	1.84	3	>sp|Q96RQ9|OXLA_HUMAN L-amino-acid oxidase OS=Homo sapiens OX=9606 GN=IL4I1 PE=1 SV=1	7783	20210911_zy_cell_scehcd_1.2345.2345.3	controllerType=0 controllerNumber=1 scan=2345	10.162
03578:2	2	R.LLNINPN[+1913.677]K.T	HexNAc(4)Hex(5)NeuAc(1)	N[+1914]	1420.11	2	2839.22	2839.22	0	-1.3	255	Specific	274.95	166.25	166.25	5.76	55	>sp|P11279|LAMP1_HUMAN Lysosome-associated membrane glycoprotein 1 OS=Homo sapiens OX=9606 GN=LAMP1 PE=1 SV=3	4405	20210911_zy_cell_scehcd_1.3904.3904.2	controllerType=0 controllerNumber=1 scan=3904	16.9497
02888:3	4	K.LRNPC[+57.021]TSEQN[+2026.687]C[+57.021]TSPFSYK.N	HexNAc(2)Hex(10)	C[+57]*2, N[+2027]	1405.89	3	4215.67	4215.66	0	1.5	203	Specific	275.28	235.86	235.86	4.46	27	>sp|P05556|ITB1_HUMAN Integrin beta-1 OS=Homo sapiens OX=9606 GN=ITGB1 PE=1 SV=2	3061	20210911_zy_cell_scehcd_1.3151.3151.3	controllerType=0 controllerNumber=1 scan=3151	13.6812
00944:2	217	R.N[+1702.581]FSGPDK.D	HexNAc(2)Hex(8)	N[+1703]	1233.97	2	2466.93	2466.94	0	-1.8	502	Specific	275.62	110.69	110.69	2.15	1	>sp|Q8IWF2|FXRD2_HUMAN FAD-dependent oxidoreductase domain-containing protein 2 OS=Homo sapiens OX=9606 GN=FOXRED2 PE=1 SV=1	6148	20210911_zy_cell_scehcd_1.1031.1031.2	controllerType=0 controllerNumber=1 scan=1031	4.4509
04110:2	13	K.DSLSIN[+1378.476]ATNIK.H	HexNAc(2)Hex(6)	N[+1378]	1277.55	2	2554.1	2554.1	0	-0.5	347	Specific	275.77	160.34	160.34	5.53	16	>sp|P00533|EGFR_HUMAN Epidermal growth factor receptor OS=Homo sapiens OX=9606 GN=EGFR PE=1 SV=2	19596	20210911_zy_cell_scehcd_1.4484.4484.2	controllerType=0 controllerNumber=1 scan=4484	19.4688
00822:2	13	R.N[+2059.735]VSR.G	HexNAc(4)Hex(5)Fuc(1)NeuAc(1)	N[+2060]	1268	2	2534.99	2535	0	-1.2	528	Specific	276.3	31.7	31.7	4.17	16	>sp|P00533|EGFR_HUMAN Epidermal growth factor receptor OS=Homo sapiens OX=9606 GN=EGFR PE=1 SV=2	19596	20210911_zy_cell_scehcd_1.898.898.2	controllerType=0 controllerNumber=1 scan=898	3.8811
02677:3	99	K.SC[+57.021]VAVTSAQPQN[+2204.772]M[+15.995]SR.R	HexNAc(4)Hex(5)NeuAc(2)	C[+57], M[+16], N[+2205]	1286.18	3	3856.52	3856.53	0	-2	517	Specific	276.65	174.02	174.02	4.88	4	>sp|O15031|PLXB2_HUMAN Plexin-B2 OS=Homo sapiens OX=9606 GN=PLXNB2 PE=1 SV=3	14843	20210911_zy_cell_scehcd_1.2921.2921.3	controllerType=0 controllerNumber=1 scan=2921	12.6722
01944:2	129	R.AFMN[+2059.735]R.T	HexNAc(4)Hex(5)Fuc(1)NeuAc(1)	N[+2060]	1349.52	2	2698.04	2698.04	0	-1.8	170	Specific	276.7	96.82	96.82	4.72	7	>sp|Q8WTV0|SCRB1_HUMAN Scavenger receptor class B member 1 OS=Homo sapiens OX=9606 GN=SCARB1 PE=1 SV=1	16447	20210911_zy_cell_scehcd_1.2122.2122.2	controllerType=0 controllerNumber=1 scan=2122	9.1945
00507:3	7	R.YHN[+1702.581]QTLR.Y	HexNAc(2)Hex(8)	N[+1703]	878.689	3	2634.05	2634.06	0	-1.4	398	Specific	277.04	61.65	61.65	4.49	21	>sp|P11717|MPRI_HUMAN Cation-independent mannose-6-phosphate receptor OS=Homo sapiens OX=9606 GN=IGF2R PE=1 SV=3	12317	20210911_zy_cell_scehcd_1.555.555.3	controllerType=0 controllerNumber=1 scan=555	2.4037
09331:3	7	K.TN[+1702.581]ITLVC[+57.021]KPGDLESAPVLR.T	HexNAc(2)Hex(8)	C[+57], N[+1703]	1262.57	3	3785.7	3785.7	0	-1.6	580	Specific	277.11	277.11	277.11	6.79	21	>sp|P11717|MPRI_HUMAN Cation-independent mannose-6-phosphate receptor OS=Homo sapiens OX=9606 GN=IGF2R PE=1 SV=3	12317	20210911_zy_cell_scehcd_1.10214.10214.3	controllerType=0 controllerNumber=1 scan=10214	44.1948
05806:2	10	K.VIN[+1864.634]ETWAWK.N	HexNAc(2)Hex(9)	N[+1865]	1506.12	2	3011.23	3011.23	0	-0.9	860	Specific	277.14	172.88	172.88	5.53	16	>sp|Q9Y4L1|HYOU1_HUMAN Hypoxia up-regulated protein 1 OS=Homo sapiens OX=9606 GN=HYOU1 PE=1 SV=1	14756	20210911_zy_cell_scehcd_1.6335.6335.2	controllerType=0 controllerNumber=1 scan=6335	27.4861
01042:2	261	R.ELN[+1702.581]GTAR.A	HexNAc(2)Hex(8)	N[+1703]	1231.99	2	2462.97	2462.98	0	-1	57	Specific	277.18	11.92	11.92	0.86	1	>sp|Q6ZSJ9|SHSA6_HUMAN Protein shisa-6 OS=Homo sapiens OX=9606 GN=SHISA6 PE=1 SV=2	15260	20210911_zy_cell_scehcd_1.1138.1138.2	controllerType=0 controllerNumber=1 scan=1138	4.9144
00820:3	59	R.GPGIKPN[+1378.476]QTSK.M	HexNAc(2)Hex(6)	N[+1378]	835.702	3	2505.09	2505.1	0	-2.2	356	Specific	277.45	93.77	93.77	4.85	6	>sp|P15586|GNS_HUMAN N-acetylglucosamine-6-sulfatase OS=Homo sapiens OX=9606 GN=GNS PE=1 SV=3	5993	20210911_zy_cell_scehcd_1.896.896.3	controllerType=0 controllerNumber=1 scan=896	3.871
02769:2	53	R.FNPPSN[+1540.529]VTVR.C	HexNAc(2)Hex(7)	N[+1541]	1336.06	2	2671.12	2671.12	0	-0.9	218	Specific	277.46	139.32	139.32	5.6	6	>sp|P15509|CSF2R_HUMAN Granulocyte-macrophage colony-stimulating factor receptor subunit alpha OS=Homo sapiens OX=9606 GN=CSF2RA PE=1 SV=1	5252	20210911_zy_cell_scehcd_1.3021.3021.2	controllerType=0 controllerNumber=1 scan=3021	13.1087
01315:2	2	K.DN[+1694.603]TTVTR.L	HexNAc(3)Hex(4)Fuc(1)NeuAc(1)	N[+1695]	1251	2	2501	2501	0	-2.1	248	Specific	277.63	68.98	68.98	4.31	55	>sp|P11279|LAMP1_HUMAN Lysosome-associated membrane glycoprotein 1 OS=Homo sapiens OX=9606 GN=LAMP1 PE=1 SV=3	4405	20210911_zy_cell_scehcd_1.1435.1435.2	controllerType=0 controllerNumber=1 scan=1435	6.2095
02143:2	139	K.SN[+1702.581]LTVLR.E	HexNAc(2)Hex(8)	N[+1703]	1253.03	2	2505.06	2505.06	0	-1.8	704	Specific	277.89	30.44	30.44	3.62	5	>sp|P18084|ITB5_HUMAN Integrin beta-5 OS=Homo sapiens OX=9606 GN=ITGB5 PE=1 SV=1	11995	20210911_zy_cell_scehcd_1.2339.2339.2	controllerType=0 controllerNumber=1 scan=2339	10.1336
05083:2	51	R.AQFTFFN[+1702.581]K.T	HexNAc(2)Hex(8)	N[+1703]	1353.05	2	2705.09	2705.09	0	0	744	Specific	278.28	141.85	141.85	5.05	13	>sp|Q86SQ4|AGRG6_HUMAN Adhesion G-protein coupled receptor G6 OS=Homo sapiens OX=9606 GN=ADGRG6 PE=1 SV=3	642	20210911_zy_cell_scehcd_1.5546.5546.3	controllerType=0 controllerNumber=1 scan=5546	24.0682
13704:3	20	R.TN[+2350.830]STFVQALVEHVK.E	HexNAc(4)Hex(5)Fuc(1)NeuAc(2)	N[+2351]	1308.56	3	3923.66	3923.67	0	-1.4	214	Specific	278.4	69.69	69.69	5.14	16	>sp|P07602|SAP_HUMAN Prosaposin OS=Homo sapiens OX=9606 GN=PSAP PE=1 SV=2	14314	20210911_zy_cell_scehcd_1.15896.15896.3	controllerType=0 controllerNumber=1 scan=15896	66.6039
03066:2	164	R.N[+1702.581]YTLSFK.E	HexNAc(2)Hex(8)	N[+1703]	1288.02	2	2575.03	2575.03	0	-0.7	79	Specific	278.53	82.09	82.09	4.51	4	>sp|Q32NC0|CR021_HUMAN UPF0711 protein C18orf21 OS=Homo sapiens OX=9606 GN=C18orf21 PE=1 SV=1	2889	20210911_zy_cell_scehcd_1.3346.3346.2	controllerType=0 controllerNumber=1 scan=3346	14.5288
08061:3	18	R.TTLVDN[+1864.634]NTWNNSHIALVGK.A	HexNAc(2)Hex(9)	N[+1865]	1321.24	3	3961.7	3961.71	0	-1	618	Specific	279.06	186.23	2.38	5.98	12	>sp|Q8TCJ2|STT3B_HUMAN Dolichyl-diphosphooligosaccharide--protein glycosyltransferase subunit STT3B OS=Homo sapiens OX=9606 GN=STT3B PE=1 SV=1	13685	20210911_zy_cell_scehcd_1.8803.8803.3	controllerType=0 controllerNumber=1 scan=8803	38.1653
03258:3	10	R.VFGSQN[+1702.581]LTTVK.L	HexNAc(2)Hex(8)	N[+1703]	966.08	3	2896.22	2896.23	0	-3	510	Specific	279.3	73.44	73.44	4.36	16	>sp|Q9Y4L1|HYOU1_HUMAN Hypoxia up-regulated protein 1 OS=Homo sapiens OX=9606 GN=HYOU1 PE=1 SV=1	14756	20210911_zy_cell_scehcd_1.3555.3555.3	controllerType=0 controllerNumber=1 scan=3555	15.4398
00705:2	20	K.LIDNN[+1864.634]K.T	HexNAc(2)Hex(9)	N[+1865]	1291.02	2	2581.03	2581.03	0	-0.9	328	Specific	279.32	57.88	57.88	4.31	16	>sp|P07602|SAP_HUMAN Prosaposin OS=Homo sapiens OX=9606 GN=PSAP PE=1 SV=2	14314	20210911_zy_cell_scehcd_1.771.771.2	controllerType=0 controllerNumber=1 scan=771	3.3423
01452:3	41	R.TSN[+1864.634]ISKPGTLER.G	HexNAc(2)Hex(9)	N[+1865]	1056.45	3	3167.33	3167.34	0	-2.8	138	Specific	279.56	55.69	55.69	4.6	11	>sp|Q9UBG0|MRC2_HUMAN C-type mannose receptor 2 OS=Homo sapiens OX=9606 GN=MRC2 PE=1 SV=2	16756	20210911_zy_cell_scehcd_1.1585.1585.3	controllerType=0 controllerNumber=1 scan=1585	6.8598
02664:4	33	K.PGN[+1702.581]LSRPPPVVVPHQPR.L	HexNAc(2)Hex(8)	N[+1703]	888.156	4	3549.6	3549.62	0	-5.6	487	Specific	279.83	279.83	279.83	5.43	4	>sp|Q9BU23|LMF2_HUMAN Lipase maturation factor 2 OS=Homo sapiens OX=9606 GN=LMF2 PE=1 SV=2	7424	20210911_zy_cell_scehcd_1.2907.2907.4	controllerType=0 controllerNumber=1 scan=2907	12.6107
03044:2	164	R.N[+1864.634]YTLSFK.E	HexNAc(2)Hex(9)	N[+1865]	1369.05	2	2737.08	2737.09	0	-0.6	79	Specific	280.38	83.9	83.9	4.58	4	>sp|Q32NC0|CR021_HUMAN UPF0711 protein C18orf21 OS=Homo sapiens OX=9606 GN=C18orf21 PE=1 SV=1	2889	20210911_zy_cell_scehcd_1.3322.3322.2	controllerType=0 controllerNumber=1 scan=3322	14.4244
02119:3	59	R.GASN[+2272.846]LTWR.S	HexNAc(8)Hex(4)	N[+2273]	1059.77	3	3177.3	3177.31	0	-2.4	402	Specific	280.42	42.86	42.86	4.35	6	>sp|P15586|GNS_HUMAN N-acetylglucosamine-6-sulfatase OS=Homo sapiens OX=9606 GN=GNS PE=1 SV=3	5993	20210911_zy_cell_scehcd_1.2312.2312.3	controllerType=0 controllerNumber=1 scan=2312	10.0188
08014:3	156	K.PLGLAN[+1864.634]DTDHYFLR.Y	HexNAc(2)Hex(9)	N[+1865]	1166.15	3	3496.45	3496.45	0	-1	159	Specific	280.67	204.15	204.15	5.86	2	>sp|Q969N2|PIGT_HUMAN GPI transamidase component PIG-T OS=Homo sapiens OX=9606 GN=PIGT PE=1 SV=1	10280	20210911_zy_cell_scehcd_1.8751.8751.3	controllerType=0 controllerNumber=1 scan=8751	37.9426
08012:3	18	R.TTLVDNNTWN[+2026.687]NSHIALVGK.A	HexNAc(2)Hex(10)	N[+2027]	1375.26	3	4123.76	4123.76	0	-0.9	618	Specific	280.84	167.63	2.06	6.06	12	>sp|Q8TCJ2|STT3B_HUMAN Dolichyl-diphosphooligosaccharide--protein glycosyltransferase subunit STT3B OS=Homo sapiens OX=9606 GN=STT3B PE=1 SV=1	13685	20210911_zy_cell_scehcd_1.8749.8749.2	controllerType=0 controllerNumber=1 scan=8749	37.9334
08021:3	156	K.PLGLAN[+1864.634]DTDHYFLR.Y	HexNAc(2)Hex(9)	N[+1865]	1166.15	3	3496.45	3496.45	0	-1.4	159	Specific	281.13	119.34	119.34	5.51	2	>sp|Q969N2|PIGT_HUMAN GPI transamidase component PIG-T OS=Homo sapiens OX=9606 GN=PIGT PE=1 SV=1	10280	20210911_zy_cell_scehcd_1.8759.8759.3	controllerType=0 controllerNumber=1 scan=8759	37.9758
05839:3	35	K.GELN[+2026.687]TSIFSSRPIDK.F	HexNAc(2)Hex(10)	N[+2027]	1230.85	3	3690.55	3690.55	0	-0.7	350	Specific	281.31	109.63	109.63	5.27	6	>sp|Q9UHG3|PCYOX_HUMAN Prenylcysteine oxidase 1 OS=Homo sapiens OX=9606 GN=PCYOX1 PE=1 SV=3	9384	20210911_zy_cell_scehcd_1.6371.6371.3	controllerType=0 controllerNumber=1 scan=6371	27.6421
04249:2	97	R.VYWN[+1751.624]R.S	HexNAc(4)Hex(4)NeuAc(1)	N[+1752]	1245	2	2488.99	2489	0	-1.6	704	Specific	282.03	7.81	7.81	3.43	9	>sp|Q7Z388|D19L4_HUMAN Probable C-mannosyltransferase DPY19L4 OS=Homo sapiens OX=9606 GN=DPY19L4 PE=1 SV=1	3670	20210911_zy_cell_scehcd_1.4636.4636.2	controllerType=0 controllerNumber=1 scan=4636	20.1272
03220:2	191	R.N[+1702.581]GTAWIYTSEK.D	HexNAc(2)Hex(8)	N[+1703]	1486.6	2	2972.18	2972.19	0	-2.6	362	Specific	282.22	199.7	199.7	5.46	1	>sp|Q13563|PKD2_HUMAN Polycystin-2 OS=Homo sapiens OX=9606 GN=PKD2 PE=1 SV=3	13734	20210911_zy_cell_scehcd_1.3514.3514.2	controllerType=0 controllerNumber=1 scan=3514	15.2595
01949:2	5	R.N[+1378.476]TTFNVESTK.K	HexNAc(2)Hex(6)	N[+1378]	1260.02	2	2519.03	2519.03	0	-1.5	418	Specific	282.84	33.85	33.85	4.96	14	>sp|P56199|ITA1_HUMAN Integrin alpha-1 OS=Homo sapiens OX=9606 GN=ITGA1 PE=1 SV=2	9701	20210911_zy_cell_scehcd_1.2127.2127.2	controllerType=0 controllerNumber=1 scan=2127	9.2183
03528:3	166	K.GN[+1864.634]STHGC[+57.021]SSEETFLIDC[+57.021]R.G	HexNAc(2)Hex(9)	C[+57]*2, N[+1865]	1312.17	3	3934.5	3934.5	0	-0.9	221	Specific	282.99	235.95	235.95	6.46	1	>sp|Q03405|UPAR_HUMAN Urokinase plasminogen activator surface receptor OS=Homo sapiens OX=9606 GN=PLAUR PE=1 SV=1	18772	20210911_zy_cell_scehcd_1.3849.3849.3	controllerType=0 controllerNumber=1 scan=3849	16.7123
01638:2	1	R.LN[+1872.651]SSTIK.Y	HexNAc(3)Hex(6)NeuAc(1)	N[+1873]	1318.05	2	2635.09	2635.09	0	-0.3	274	Specific	283.46	5.52	5.52	3.27	36	>sp|P13473|LAMP2_HUMAN Lysosome-associated membrane glycoprotein 2 OS=Homo sapiens OX=9606 GN=LAMP2 PE=1 SV=2	6694	20210911_zy_cell_scehcd_1.1788.1788.2	controllerType=0 controllerNumber=1 scan=1788	7.7435
05201:3	180	R.SLHVPGLN[+2350.830]K.T	HexNAc(4)Hex(5)Fuc(1)NeuAc(2)	N[+2351]	1105.8	3	3315.38	3315.39	0	-1.6	191	Specific	283.46	159.27	159.27	5.93	1	>sp|P30530|UFO_HUMAN Tyrosine-protein kinase receptor UFO OS=Homo sapiens OX=9606 GN=AXL PE=1 SV=4	18964	20210911_zy_cell_scehcd_1.5675.5675.3	controllerType=0 controllerNumber=1 scan=5675	24.6259
02217:3	94	K.HLLEN[+1540.529]STASVSEAER.K	HexNAc(2)Hex(7)	N[+1541]	1061.78	3	3183.33	3183.33	0	-1.1	162	Specific	283.82	224.98	224.98	6.06	5	>sp|P42892|ECE1_HUMAN Endothelin-converting enzyme 1 OS=Homo sapiens OX=9606 GN=ECE1 PE=1 SV=2	4441	20210911_zy_cell_scehcd_1.2419.2419.3	controllerType=0 controllerNumber=1 scan=2419	10.4852
01702:2	263	R.ALN[+1702.581]ESKR.V	HexNAc(2)Hex(8)	N[+1703]	1260.52	2	2520.03	2520.03	0	-0.7	16	Specific	283.97	75.84	75.84	0.85	2	>sp|Q9UGN5|PARP2_HUMAN Poly [ADP-ribose] polymerase 2 OS=Homo sapiens OX=9606 GN=PARP2 PE=1 SV=2	9841	20210911_zy_cell_scehcd_1.1858.1858.2	controllerType=0 controllerNumber=1 scan=1858	8.0477
01395:3	11	R.YHYN[+1378.476]GTFEDGKK.F	HexNAc(2)Hex(6)	N[+1378]	946.383	3	2837.13	2837.14	0	-2.4	67	Specific	284.41	244.2	244.2	4.85	13	>sp|Q96AY3|FKB10_HUMAN Peptidyl-prolyl cis-trans isomerase FKBP10 OS=Homo sapiens OX=9606 GN=FKBP10 PE=1 SV=1	19614	20210911_zy_cell_scehcd_1.1523.1523.3	controllerType=0 controllerNumber=1 scan=1523	6.5911
02014:2	94	R.DYYLN[+1864.634]K.T	HexNAc(2)Hex(9)	N[+1865]	1340.52	2	2680.03	2680.03	0	-0.6	266	Specific	284.54	133.15	133.15	4.6	5	>sp|P42892|ECE1_HUMAN Endothelin-converting enzyme 1 OS=Homo sapiens OX=9606 GN=ECE1 PE=1 SV=2	4441	20210911_zy_cell_scehcd_1.2198.2198.2	controllerType=0 controllerNumber=1 scan=2198	9.5275
03915:3	4	K.LRNPC[+57.021]TSEQN[+2059.735]C[+57.021]TSPFSYK.N	HexNAc(4)Hex(5)Fuc(1)NeuAc(1)	C[+57]*2, N[+2060]	1416.91	3	4248.71	4248.71	0	-1.1	203	Specific	284.58	186.37	186.37	5.44	27	>sp|P05556|ITB1_HUMAN Integrin beta-1 OS=Homo sapiens OX=9606 GN=ITGB1 PE=1 SV=2	3061	20210911_zy_cell_scehcd_1.4272.4272.3	controllerType=0 controllerNumber=1 scan=4272	18.5458
03333:3	2	R.GHTLTLN[+1540.529]FTR.N	HexNAc(2)Hex(7)	N[+1541]	900.72	3	2700.14	2700.15	0	-2.4	97	Specific	284.74	70.75	70.75	5.18	55	>sp|P11279|LAMP1_HUMAN Lysosome-associated membrane glycoprotein 1 OS=Homo sapiens OX=9606 GN=LAMP1 PE=1 SV=3	4405	20210911_zy_cell_scehcd_1.3637.3637.3	controllerType=0 controllerNumber=1 scan=3637	15.788
02735:3	221	R.HDREPSFN[+1702.581]ETFR.F	HexNAc(2)Hex(8)	N[+1703]	1079.77	3	3237.28	3237.28	0	-1.3	5074	Specific	284.94	37.71	37.71	1.3	3	>sp|Q9Y6V0|PCLO_HUMAN Protein piccolo OS=Homo sapiens OX=9606 GN=PCLO PE=1 SV=5	15388	20210911_zy_cell_scehcd_1.2984.2984.3	controllerType=0 controllerNumber=1 scan=2984	12.9473
01908:2	15	R.YN[+1216.423]C[+57.021]SIESPR.K	HexNAc(2)Hex(5)	C[+57], N[+1216]	1171.46	2	2341.92	2341.92	0	-1.4	695	Specific	285.06	189.42	189.42	6.05	13	>sp|O00469|PLOD2_HUMAN Procollagen-lysine,2-oxoglutarate 5-dioxygenase 2 OS=Homo sapiens OX=9606 GN=PLOD2 PE=1 SV=2	15649	20210911_zy_cell_scehcd_1.2082.2082.2	controllerType=0 controllerNumber=1 scan=2082	9.0231
06727:3	103	R.LAN[+1702.581]LTQGEDQYYLR.V	HexNAc(2)Hex(8)	N[+1703]	1129.47	3	3386.4	3386.41	0	-3.2	372	Specific	285.1	285.1	285.1	5.15	5	>sp|P10909|CLUS_HUMAN Clusterin OS=Homo sapiens OX=9606 GN=CLU PE=1 SV=1	6125	20210911_zy_cell_scehcd_1.7340.7340.3	controllerType=0 controllerNumber=1 scan=7340	31.8386
01902:2	42	K.N[+1419.502]QSVPLSC[+57.021]C[+57.021]R.E	HexNAc(3)Hex(5)	C[+57]*2, N[+1420]	1320.53	2	2640.05	2640.05	0	-0.2	167	Specific	285.35	146.05	146.05	5.12	6	>sp|O60637|TSN3_HUMAN Tetraspanin-3 OS=Homo sapiens OX=9606 GN=TSPAN3 PE=2 SV=1	16532	20210911_zy_cell_scehcd_1.2076.2076.2	controllerType=0 controllerNumber=1 scan=2076	8.9954
02786:2	97	R.VYWN[+1872.651]R.S	HexNAc(3)Hex(6)NeuAc(1)	N[+1873]	1305.51	2	2610.02	2610.02	0	-1.2	704	Specific	285.36	1.2	1.2	3.43	9	>sp|Q7Z388|D19L4_HUMAN Probable C-mannosyltransferase DPY19L4 OS=Homo sapiens OX=9606 GN=DPY19L4 PE=1 SV=1	3670	20210911_zy_cell_scehcd_1.3040.3040.3	controllerType=0 controllerNumber=1 scan=3040	13.1901
03666:3	22	K.AN[+1540.529]TTQPGIVEGGQVLK.C	HexNAc(2)Hex(7)	N[+1541]	1051.47	3	3152.4	3152.4	0	-1	73	Specific	286.17	286.17	286.17	6.38	12	>sp|P06756|ITAV_HUMAN Integrin alpha-V OS=Homo sapiens OX=9606 GN=ITGAV PE=1 SV=2	6597	20210911_zy_cell_scehcd_1.4000.4000.3	controllerType=0 controllerNumber=1 scan=4000	17.3666
14076:3	108	K.AFN[+2861.000]STLPTMAQMEK.A	HexNAc(5)Hex(6)NeuAc(3)	N[+2861]	1476.92	3	4428.75	4429.74	-1	1.1	55	Specific	286.86	129.85	129.85	3.72	10	>sp|P16070|CD44_HUMAN CD44 antigen OS=Homo sapiens OX=9606 GN=CD44 PE=1 SV=3	1144	20210911_zy_cell_scehcd_1.16378.16378.3	controllerType=0 controllerNumber=1 scan=16378	68.4822
02807:3	174	K.IQQESLGSAPLM[+15.995]GDDHPN[+1378.476]ASR.D	HexNAc(2)Hex(6)	M[+16], N[+1378]	1206.51	3	3617.51	3617.52	0	-2.5	572	Specific	287.39	287.39	287.39	6.43	1	>sp|Q5JRA6|TGO1_HUMAN Transport and Golgi organization protein 1 homolog OS=Homo sapiens OX=9606 GN=MIA3 PE=1 SV=1	15833	20210911_zy_cell_scehcd_1.3063.3063.3	controllerType=0 controllerNumber=1 scan=3063	13.2901
01948:3	190	R.EERPLN[+1702.581]ASALK.L	HexNAc(2)Hex(8)	N[+1703]	977.42	3	2930.24	2930.25	0	-2.1	59	Specific	288.06	118.13	118.13	5.46	1	>sp|O14657|TOR1B_HUMAN Torsin-1B OS=Homo sapiens OX=9606 GN=TOR1B PE=1 SV=2	17060	20210911_zy_cell_scehcd_1.2126.2126.3	controllerType=0 controllerNumber=1 scan=2126	9.2137
09244:3	20	R.TN[+1864.634]STFVQALVEHVK.E	HexNAc(2)Hex(9)	N[+1865]	1146.49	3	3437.47	3437.47	0	-0.7	214	Specific	288.4	120.76	120.76	5.27	16	>sp|P07602|SAP_HUMAN Prosaposin OS=Homo sapiens OX=9606 GN=PSAP PE=1 SV=2	14314	20210911_zy_cell_scehcd_1.10118.10118.3	controllerType=0 controllerNumber=1 scan=10118	43.7825
09643:3	99	R.SIN[+1864.634]VTGQGFSLIQR.F	HexNAc(2)Hex(9)	N[+1865]	1128.82	3	3384.45	3384.46	0	-2.7	1000	Specific	288.46	288.46	288.46	5.15	4	>sp|O15031|PLXB2_HUMAN Plexin-B2 OS=Homo sapiens OX=9606 GN=PLXNB2 PE=1 SV=3	14843	20210911_zy_cell_scehcd_1.10574.10574.3	controllerType=0 controllerNumber=1 scan=10574	45.6917
04107:3	4	R.NPC[+57.021]TSEQN[+1872.651]C[+57.021]TSPFSYK.N	HexNAc(3)Hex(6)NeuAc(1)	C[+57]*2, N[+1873]	1264.82	3	3792.44	3792.44	0	-0.5	205	Specific	288.52	123.96	123.96	5.43	27	>sp|P05556|ITB1_HUMAN Integrin beta-1 OS=Homo sapiens OX=9606 GN=ITGB1 PE=1 SV=2	3061	20210911_zy_cell_scehcd_1.4481.4481.3	controllerType=0 controllerNumber=1 scan=4481	19.455
01085:2	204	K.LLHAYN[+1702.581]R.T	HexNAc(2)Hex(8)	N[+1703]	1295.04	2	2589.07	2589.07	0	-0.6	119	Specific	289.29	86.83	86.83	2.04	3	>sp|Q13214|SEM3B_HUMAN Semaphorin-3B OS=Homo sapiens OX=9606 GN=SEMA3B PE=2 SV=1	16209	20210911_zy_cell_scehcd_1.1185.1185.2	controllerType=0 controllerNumber=1 scan=1185	5.1191
02124:2	59	R.GASN[+1702.581]LTWR.S	HexNAc(2)Hex(8)	N[+1703]	1304.03	2	2607.04	2607.04	0	-0.3	402	Specific	289.35	139.11	139.11	5.68	6	>sp|P15586|GNS_HUMAN N-acetylglucosamine-6-sulfatase OS=Homo sapiens OX=9606 GN=GNS PE=1 SV=3	5993	20210911_zy_cell_scehcd_1.2318.2318.2	controllerType=0 controllerNumber=1 scan=2318	10.0434
04058:2	125	R.YN[+1864.634]GTVGLWR.R	HexNAc(2)Hex(9)	N[+1865]	1465.59	2	2930.18	2930.18	0	-1	71	Specific	289.73	142.89	142.89	5.68	2	>sp|Q9NY35|CLDN1_HUMAN Claudin domain-containing protein 1 OS=Homo sapiens OX=9606 GN=CLDND1 PE=1 SV=1	2194	20210911_zy_cell_scehcd_1.4428.4428.2	controllerType=0 controllerNumber=1 scan=4428	19.2231
00808:2	4	R.N[+1913.677]VTR.L	HexNAc(4)Hex(5)NeuAc(1)	N[+1914]	1201.98	2	2402.95	2402.95	0	-1.4	269	Specific	289.81	66.15	66.15	4.56	27	>sp|P05556|ITB1_HUMAN Integrin beta-1 OS=Homo sapiens OX=9606 GN=ITGB1 PE=1 SV=2	3061	20210911_zy_cell_scehcd_1.883.883.2	controllerType=0 controllerNumber=1 scan=883	3.823
03883:2	184	R.LSITN[+1702.581]ETFR.K	HexNAc(2)Hex(8)	N[+1703]	1392.08	2	2783.15	2783.15	0	-0.4	193	Specific	289.95	125.24	125.24	5.46	2	>sp|Q9BX74|TM2D1_HUMAN TM2 domain-containing protein 1 OS=Homo sapiens OX=9606 GN=TM2D1 PE=1 SV=1	18643	20210911_zy_cell_scehcd_1.4237.4237.2	controllerType=0 controllerNumber=1 scan=4237	18.3943
03245:2	176	R.TVPPMVN[+1702.581]VTR.S	HexNAc(2)Hex(8)	N[+1703]	1408.6	2	2816.19	2816.19	0	-0.3	204	Specific	289.96	156.24	156.24	5.68	1	>sp|Q29983|MICA_HUMAN MHC class I polypeptide-related sequence A OS=Homo sapiens OX=9606 GN=MICA PE=1 SV=1	7436	20210911_zy_cell_scehcd_1.3541.3541.2	controllerType=0 controllerNumber=1 scan=3541	15.3784
04250:2	97	R.VYWN[+1913.677]R.S	HexNAc(4)Hex(5)NeuAc(1)	N[+1914]	1326.03	2	2651.05	2651.05	0	-1.5	704	Specific	290.06	6.98	6.98	3.43	9	>sp|Q7Z388|D19L4_HUMAN Probable C-mannosyltransferase DPY19L4 OS=Homo sapiens OX=9606 GN=DPY19L4 PE=1 SV=1	3670	20210911_zy_cell_scehcd_1.4637.4637.2	controllerType=0 controllerNumber=1 scan=4637	20.1318
02446:2	36	R.TSIPTINM[+15.995]EN[+1540.529]K.T	HexNAc(2)Hex(7)	M[+16], N[+1541]	1402.58	2	2804.15	2804.15	0	-1.4	960	Specific	290.26	205.93	205.93	6.05	12	>sp|P26006|ITA3_HUMAN Integrin alpha-3 OS=Homo sapiens OX=9606 GN=ITGA3 PE=1 SV=5	6507	20210911_zy_cell_scehcd_1.2669.2669.2	controllerType=0 controllerNumber=1 scan=2669	11.5746
01914:3	6	K.PIN[+1378.476]TTGTLKPDDR.V	HexNAc(2)Hex(6)	N[+1378]	936.077	3	2806.22	2806.22	0	-2.7	262	Specific	291.22	118.64	118.64	4.24	14	>sp|Q92542|NICA_HUMAN Nicastrin OS=Homo sapiens OX=9606 GN=NCSTN PE=1 SV=2	7240	20210911_zy_cell_scehcd_1.2089.2089.3	controllerType=0 controllerNumber=1 scan=2089	9.0522
03191:2	123	R.N[+2026.687]YTLWR.V	HexNAc(2)Hex(10)	N[+2027]	1440.06	2	2879.12	2879.12	0	-1.4	184	Specific	291.35	129.79	129.79	4.82	4	>sp|Q9UBR2|CATZ_HUMAN Cathepsin Z OS=Homo sapiens OX=9606 GN=CTSZ PE=1 SV=1	19942	20210911_zy_cell_scehcd_1.3482.3482.2	controllerType=0 controllerNumber=1 scan=3482	15.1219
05529:2	28	K.QNNGAFN[+1378.476]ETLFR.N	HexNAc(2)Hex(6)	N[+1378]	1395.08	2	2789.15	2789.15	0	-1	721	Specific	291.7	45.85	45.85	4.58	8	>sp|P02786|TFR1_HUMAN Transferrin receptor protein 1 OS=Homo sapiens OX=9606 GN=TFRC PE=1 SV=2	16028	20210911_zy_cell_scehcd_1.6032.6032.3	controllerType=0 controllerNumber=1 scan=6032	26.1759
07081:3	200	K.LN[+1864.634]DTYVNVGLYSTK.T	HexNAc(2)Hex(9)	N[+1865]	1151.15	3	3451.44	3451.44	0	-1.1	124	Specific	291.79	96.3	96.3	5.02	1	>sp|O14524|NEMP1_HUMAN Nuclear envelope integral membrane protein 1 OS=Homo sapiens OX=9606 GN=NEMP1 PE=1 SV=2	11780	20210911_zy_cell_scehcd_1.7728.7728.3	controllerType=0 controllerNumber=1 scan=7728	33.5131
12724:3	108	K.AFN[+2204.772]STLPTMAQMEK.A	HexNAc(4)Hex(5)NeuAc(2)	N[+2205]	1258.51	3	3773.51	3773.52	0	-1.2	55	Specific	292.3	149.7	149.7	5.26	10	>sp|P16070|CD44_HUMAN CD44 antigen OS=Homo sapiens OX=9606 GN=CD44 PE=1 SV=3	1144	20210911_zy_cell_scehcd_1.14520.14520.3	controllerType=0 controllerNumber=1 scan=14520	61.3828
02872:3	144	K.YRDFQHLLN[+2026.687]R.T	HexNAc(2)Hex(10)	N[+2027]	1130.13	3	3388.39	3388.39	0	-1.6	229	Specific	292.42	114.48	114.48	4.69	3	>sp|Q13444|ADA15_HUMAN Disintegrin and metalloproteinase domain-containing protein 15 OS=Homo sapiens OX=9606 GN=ADAM15 PE=1 SV=4	339	20210911_zy_cell_scehcd_1.3134.3134.3	controllerType=0 controllerNumber=1 scan=3134	13.6055
00810:3	59	R.GPGIKPN[+1864.634]QTSK.M	HexNAc(2)Hex(9)	N[+1865]	997.755	3	2991.25	2991.26	0	-2.1	356	Specific	292.74	108.31	108.31	5.46	6	>sp|P15586|GNS_HUMAN N-acetylglucosamine-6-sulfatase OS=Homo sapiens OX=9606 GN=GNS PE=1 SV=3	5993	20210911_zy_cell_scehcd_1.885.885.3	controllerType=0 controllerNumber=1 scan=885	3.8278
02749:2	51	K.GFN[+1864.634]ASYIR.V	HexNAc(2)Hex(9)	N[+1865]	1396.55	2	2792.1	2792.1	0	-1.8	141	Specific	292.76	66.3	66.3	5.41	13	>sp|Q86SQ4|AGRG6_HUMAN Adhesion G-protein coupled receptor G6 OS=Homo sapiens OX=9606 GN=ADGRG6 PE=1 SV=3	642	20210911_zy_cell_scehcd_1.3000.3000.2	controllerType=0 controllerNumber=1 scan=3000	13.0145
02430:3	2	R.LLNINPN[+2498.904]K.T	HexNAc(6)Hex(7)Fuc(1)	N[+2499]	1142.15	3	3424.45	3424.45	0	-1.4	255	Specific	293.3	190.34	190.34	5.57	55	>sp|P11279|LAMP1_HUMAN Lysosome-associated membrane glycoprotein 1 OS=Homo sapiens OX=9606 GN=LAMP1 PE=1 SV=3	4405	20210911_zy_cell_scehcd_1.2652.2652.3	controllerType=0 controllerNumber=1 scan=2652	11.4986
03361:4	3	R.THN[+2059.735]LTDLSPHLR.Y	HexNAc(4)Hex(5)Fuc(1)NeuAc(1)	N[+2060]	866.622	4	3463.47	3463.47	0	-1.8	977	Specific	293.57	111.79	111.79	5.28	29	>sp|P32004|L1CAM_HUMAN Neural cell adhesion molecule L1 OS=Homo sapiens OX=9606 GN=L1CAM PE=1 SV=2	3537	20210911_zy_cell_scehcd_1.3667.3667.2	controllerType=0 controllerNumber=1 scan=3667	15.9204
08391:3	110	R.LSAVNSIFLSHN[+2350.830]NTK.E	HexNAc(4)Hex(5)Fuc(1)NeuAc(2)	N[+2351]	1332.57	3	3995.69	3995.7	0	-2	442	Specific	295.04	112.05	112.05	5.28	4	>sp|P48960|CD97_HUMAN CD97 antigen OS=Homo sapiens OX=9606 GN=CD97 PE=1 SV=4	8146	20210911_zy_cell_scehcd_1.9166.9166.3	controllerType=0 controllerNumber=1 scan=9166	39.7279
01858:3	37	R.AN[+1540.529]HSGAVVLLK.R	HexNAc(2)Hex(7)	N[+1541]	883.729	3	2649.17	2649.18	0	-1.2	322	Specific	295.6	66.48	66.48	5.41	11	>sp|P23229|ITA6_HUMAN Integrin alpha-6 OS=Homo sapiens OX=9606 GN=ITGA6 PE=1 SV=5	4737	20210911_zy_cell_scehcd_1.2028.2028.3	controllerType=0 controllerNumber=1 scan=2028	8.7866
03003:2	198	K.LGIYADVGN[+1864.634]K.T	HexNAc(2)Hex(9)	N[+1865]	1457.6	2	2914.2	2914.2	0	-0.1	131	Specific	296.3	174.43	174.43	5.05	2	>sp|P06280|AGAL_HUMAN Alpha-galactosidase A OS=Homo sapiens OX=9606 GN=GLA PE=1 SV=1	202	20210911_zy_cell_scehcd_1.3277.3277.2	controllerType=0 controllerNumber=1 scan=3277	14.2299
08888:3	141	R.YC[+57.021]NLEGPPIN[+1864.634]SSVFK.E	HexNAc(2)Hex(9)	C[+57], N[+1865]	1197.16	3	3589.46	3589.47	0	-0.2	120	Specific	296.67	116.26	116.26	4.34	2	>sp|Q17RY6|LY6K_HUMAN Lymphocyte antigen 6K OS=Homo sapiens OX=9606 GN=LY6K PE=1 SV=2	6814	20210911_zy_cell_scehcd_1.9721.9721.3	controllerType=0 controllerNumber=1 scan=9721	42.0908
02408:2	30	K.DLM[+15.995]VIN[+1702.581]R.S	HexNAc(2)Hex(8)	M[+16], N[+1703]	1290.02	2	2579.04	2579.04	0	-0.9	224	Specific	296.76	177.36	177.36	4.73	6	>sp|Q96KA5|CLP1L_HUMAN Cleft lip and palate transmembrane protein 1-like protein OS=Homo sapiens OX=9606 GN=CLPTM1L PE=1 SV=1	1199	20210911_zy_cell_scehcd_1.2628.2628.2	controllerType=0 controllerNumber=1 scan=2628	11.3941
05160:2	201	K.SN[+1702.581]LSDLLEK.L	HexNAc(2)Hex(8)	N[+1703]	1361.06	2	2721.12	2721.12	0	-0.1	413	Specific	296.89	80.67	80.67	4.89	2	>sp|Q6UW63|PLGT2_HUMAN Protein O-glucosyltransferase 2 OS=Homo sapiens OX=9606 GN=POGLUT2 PE=1 SV=1	10765	20210911_zy_cell_scehcd_1.5630.5630.2	controllerType=0 controllerNumber=1 scan=5630	24.4321
03619:3	22	K.AN[+1702.581]TTQPGIVEGGQVLK.C	HexNAc(2)Hex(8)	N[+1703]	1105.49	3	3314.45	3314.45	0	-1.5	73	Specific	296.98	156.2	156.2	5.89	12	>sp|P06756|ITAV_HUMAN Integrin alpha-V OS=Homo sapiens OX=9606 GN=ITGAV PE=1 SV=2	6597	20210911_zy_cell_scehcd_1.3949.3949.3	controllerType=0 controllerNumber=1 scan=3949	17.1441
01613:3	8	K.NN[+1768.640]HTASILDR.M	HexNAc(4)Hex(5)Fuc(1)	N[+1769]	970.408	3	2909.21	2909.22	0	-1.8	129	Specific	297.01	124.33	124.33	5.46	19	>sp|P08962|CD63_HUMAN CD63 antigen OS=Homo sapiens OX=9606 GN=CD63 PE=1 SV=2	5151	20210911_zy_cell_scehcd_1.1761.1761.3	controllerType=0 controllerNumber=1 scan=1761	7.6248
01092:2	211	R.NLN[+1864.634]MSR.V	HexNAc(2)Hex(9)	N[+1865]	1300	2	2598.99	2599	0	-1.1	271	Specific	297.57	83.71	83.71	2.41	2	>sp|P38571|LICH_HUMAN Lysosomal acid lipase/cholesteryl ester hydrolase OS=Homo sapiens OX=9606 GN=LIPA PE=1 SV=2	6327	20210911_zy_cell_scehcd_1.1192.1192.2	controllerType=0 controllerNumber=1 scan=1192	5.1521
02354:3	2	R.LLNINPN[+2864.036]K.T	HexNAc(7)Hex(8)Fuc(1)	N[+2864]	1263.86	3	3789.58	3789.58	0	-0.9	255	Specific	298.65	13.09	13.09	3.65	55	>sp|P11279|LAMP1_HUMAN Lysosome-associated membrane glycoprotein 1 OS=Homo sapiens OX=9606 GN=LAMP1 PE=1 SV=3	4405	20210911_zy_cell_scehcd_1.2569.2569.2	controllerType=0 controllerNumber=1 scan=2569	11.1378
02820:4	25	R.FTFTSHTPGEHQIC[+57.021]LHSN[+1216.423]STK.F	HexNAc(2)Hex(5)	C[+57], N[+1216]	912.142	4	3645.55	3645.55	0	-2	108	Specific	298.8	113.99	113.99	5.52	6	>sp|Q9BVK6|TMED9_HUMAN Transmembrane emp24 domain-containing protein 9 OS=Homo sapiens OX=9606 GN=TMED9 PE=1 SV=2	14554	20210911_zy_cell_scehcd_1.3077.3077.4	controllerType=0 controllerNumber=1 scan=3077	13.3555
[truncated: 636 more rows]

## Sheet: sceHCD-R2
Query #:z	Protein Rank	Peptide < ProteinMetrics Confidential >	Glycans NHFAGNa	Modification Type(s)	Observed m/z	z	Observed (M+H)	Calc. mass (M+H)	Off-by-x error	Mass error (ppm)	Starting position	Cleavage	Score	Delta	Delta Mod	|Log Prob|	# of unique peptides	Protein Name	Protein DB number	Comment	Scan #	Scan Time
[truncated: 870 more rows]

[truncated: 10 more sheets: sceHCD-R3, EThcD-sceHCD-R1, EThcD-sceHCD-R2, EThcD-sceHCD-R3, HCD-pd-ETD-R1, HCD-pd-ETD-R2, HCD-pd-ETD-R3, sceHCD-pd-ETD-R1, sceHCD-pd-ETD-R2, sceHCD-pd-ETD-R3]
