# Supplementary material for: Comparative N-Glycoproteomics Analysis of Clinical Samples Via Different Mass Spectrometry Dissociation Methods
Source: Front Chem. 2022 Feb 24;10:839470. doi: 10.3389/fchem.2022.839470 (PMC8907888; doi:10.3389/fchem.2022.839470)
Supplement: Supplementary file 1 [file DataSheet1.ZIP › Table S4-Intact N-glycopeptides identified fromTC patients' tissues using five methods.xls]

## Sheet: EThcD-R1
Query #:z	Protein Rank	Peptide < ProteinMetrics Confidential >	Glycans NHFAGNa	Modification Type(s)	Observed m/z	z	Observed (M+H)	Calc. mass (M+H)	Off-by-x error	Mass error (ppm)	Starting position	Cleavage	Score	Delta	Delta Mod	|Log Prob|	# of unique peptides	Protein Name	Protein DB number	Comment	Scan #	Scan Time
11850:3	1	K.FVN[+2018.708]TTDMMIFDLVHSYNR.F	HexNAc(3)Hex(6)Fuc(1)NeuAc(1)	N[+2019]	1408.25	3	4222.74	4221.74	1	-1.4	196	Specific	237.04	110.19	110.19	6.6	175	>sp|P01266|THYG_HUMAN Thyroglobulin OS=Homo sapiens OX=9606 GN=TG PE=1 SV=5	17152	20210911_zy_tissue_ethcd_1.13021.13021.3	controllerType=0 controllerNumber=1 scan=13021	58.7132
11696:3	1	K.FVN[+2018.708]TTDMMIFDLVHSYNR.F	HexNAc(3)Hex(6)Fuc(1)NeuAc(1)	N[+2019]	1408.25	3	4222.73	4221.74	1	-2.4	196	Specific	250.01	120.6	120.6	6.18	175	>sp|P01266|THYG_HUMAN Thyroglobulin OS=Homo sapiens OX=9606 GN=TG PE=1 SV=5	17152	20210911_zy_tissue_ethcd_1.12852.12852.3	controllerType=0 controllerNumber=1 scan=12852	57.9596
11770:3	1	K.FVN[+2018.708]TTDMMIFDLVHSYNR.F	HexNAc(3)Hex(6)Fuc(1)NeuAc(1)	N[+2019]	1407.92	3	4221.74	4221.74	0	1.2	196	Specific	253	122.81	122.81	5.46	175	>sp|P01266|THYG_HUMAN Thyroglobulin OS=Homo sapiens OX=9606 GN=TG PE=1 SV=5	17152	20210911_zy_tissue_ethcd_1.12933.12933.3	controllerType=0 controllerNumber=1 scan=12933	58.3177
13229:4	1	K.FVN[+2676.952]TTDMMIFDLVHSYNR.F	HexNAc(6)Hex(9)	N[+2677]	1220.49	4	4878.95	4879.98	-1	-5.1	196	Specific	258.29	148.69	148.69	5.54	175	>sp|P01266|THYG_HUMAN Thyroglobulin OS=Homo sapiens OX=9606 GN=TG PE=1 SV=5	17152	20210911_zy_tissue_ethcd_1.14534.14534.4	controllerType=0 controllerNumber=1 scan=14534	65.5064
13292:3	1	K.FVN[+2295.824]TTDMM[+15.995]IFDLVHSYNR.F	HexNAc(5)Hex(7)Fuc(1)	M[+16], N[+2296]	1505.28	3	4513.83	4514.85	-1	-4.7	196	Specific	237.72	90.37	8.61	5.68	175	>sp|P01266|THYG_HUMAN Thyroglobulin OS=Homo sapiens OX=9606 GN=TG PE=1 SV=5	17152	20210911_zy_tissue_ethcd_1.14603.14603.3	controllerType=0 controllerNumber=1 scan=14603	65.8136
13220:3	1	K.FVN[+2295.824]TTDMM[+15.995]IFDLVHSYNR.F	HexNAc(5)Hex(7)Fuc(1)	M[+16], N[+2296]	1505.28	3	4513.82	4514.85	-1	-4.9	196	Specific	267.55	131.46	4.29	5.86	175	>sp|P01266|THYG_HUMAN Thyroglobulin OS=Homo sapiens OX=9606 GN=TG PE=1 SV=5	17152	20210911_zy_tissue_ethcd_1.14524.14524.3	controllerType=0 controllerNumber=1 scan=14524	65.4626
13357:3	1	K.FVN[+1930.692]TTDMM[+15.995]IFDLVHSYNR.F	HexNAc(4)Hex(6)Fuc(1)	M[+16], N[+1931]	1383.57	3	4148.7	4149.72	-1	-4.7	196	Specific	312.25	111.86	6.82	5.85	175	>sp|P01266|THYG_HUMAN Thyroglobulin OS=Homo sapiens OX=9606 GN=TG PE=1 SV=5	17152	20210911_zy_tissue_ethcd_1.14674.14674.3	controllerType=0 controllerNumber=1 scan=14674	66.1258
13293:3	1	K.FVN[+1930.692]TTDMM[+15.995]IFDLVHSYNR.F	HexNAc(4)Hex(6)Fuc(1)	M[+16], N[+1931]	1383.57	3	4148.7	4149.72	-1	-4.8	196	Specific	313.61	119.97	15.26	5.97	175	>sp|P01266|THYG_HUMAN Thyroglobulin OS=Homo sapiens OX=9606 GN=TG PE=1 SV=5	17152	20210911_zy_tissue_ethcd_1.14604.14604.3	controllerType=0 controllerNumber=1 scan=14604	65.8188
14020:3	1	K.FVN[+2221.788]TTDMM[+15.995]IFDLVHSYNR.F	HexNAc(4)Hex(6)Fuc(1)NeuAc(1)	M[+16], N[+2222]	1480.61	3	4439.81	4440.81	-1	-1.1	196	Specific	334.81	206.75	8.29	6.22	175	>sp|P01266|THYG_HUMAN Thyroglobulin OS=Homo sapiens OX=9606 GN=TG PE=1 SV=5	17152	20210911_zy_tissue_ethcd_1.15399.15399.3	controllerType=0 controllerNumber=1 scan=15399	69.3311
14053:3	1	K.FVN[+2221.788]TTDMM[+15.995]IFDLVHSYNR.F	HexNAc(4)Hex(6)Fuc(1)NeuAc(1)	M[+16], N[+2222]	1480.6	3	4439.8	4440.81	-1	-3.4	196	Specific	375.09	240.69	19.41	6.42	175	>sp|P01266|THYG_HUMAN Thyroglobulin OS=Homo sapiens OX=9606 GN=TG PE=1 SV=5	17152	20210911_zy_tissue_ethcd_1.15436.15436.3	controllerType=0 controllerNumber=1 scan=15436	69.4887
07064:3	1	R.QEDLAKPLSVGLDSN[+2059.735]SSTGTPEAAK.K	HexNAc(4)Hex(5)Fuc(1)NeuAc(1)	N[+2060]	1525.66	3	4574.97	4574.99	0	-3.3	515	Specific	228.69	130.9	130.9	6.59	175	>sp|P01266|THYG_HUMAN Thyroglobulin OS=Homo sapiens OX=9606 GN=TG PE=1 SV=5	17152	20210911_zy_tissue_ethcd_1.7770.7770.3	controllerType=0 controllerNumber=1 scan=7770	35.1048
09133:3	1	K.PLSVGLDSN[+3007.058]SSTGTPEAAK.K	HexNAc(5)Hex(6)Fuc(1)NeuAc(3)	N[+3007]	1613.33	3	4837.98	4837.97	0	2.5	521	Specific	200.88	107.7	107.7	4.52	175	>sp|P01266|THYG_HUMAN Thyroglobulin OS=Homo sapiens OX=9606 GN=TG PE=1 SV=5	17152	20210911_zy_tissue_ethcd_1.10041.10041.3	controllerType=0 controllerNumber=1 scan=10041	45.3255
06567:3	1	K.PLSVGLDSN[+2715.963]SSTGTPEAAK.K	HexNAc(5)Hex(6)Fuc(1)NeuAc(2)	N[+2716]	1516.29	3	4546.85	4546.87	0	-3.4	521	Specific	207.32	120.05	120.05	5.37	175	>sp|P01266|THYG_HUMAN Thyroglobulin OS=Homo sapiens OX=9606 GN=TG PE=1 SV=5	17152	20210911_zy_tissue_ethcd_1.7224.7224.3	controllerType=0 controllerNumber=1 scan=7224	32.6232
09040:4	1	K.PLSVGLDSN[+3210.137]SSTGTPEAAK.K	HexNAc(6)Hex(6)Fuc(1)NeuAc(3)	N[+3210]	1261.01	4	5041.03	5041.05	0	-2.5	521	Specific	210.93	170.92	170.92	5.97	175	>sp|P01266|THYG_HUMAN Thyroglobulin OS=Homo sapiens OX=9606 GN=TG PE=1 SV=5	17152	20210911_zy_tissue_ethcd_1.9939.9939.3	controllerType=0 controllerNumber=1 scan=9939	44.857
08839:3	1	K.PLSVGLDSN[+3007.058]SSTGTPEAAK.K	HexNAc(5)Hex(6)Fuc(1)NeuAc(3)	N[+3007]	1613.33	3	4837.96	4837.97	0	-1.1	521	Specific	212.78	108.21	108.21	5.61	175	>sp|P01266|THYG_HUMAN Thyroglobulin OS=Homo sapiens OX=9606 GN=TG PE=1 SV=5	17152	20210911_zy_tissue_ethcd_1.9718.9718.3	controllerType=0 controllerNumber=1 scan=9718	43.8538
08997:3	1	K.PLSVGLDSN[+3210.137]SSTGTPEAAK.K	HexNAc(6)Hex(6)Fuc(1)NeuAc(3)	N[+3210]	1680.69	3	5040.04	5041.05	-1	-0.2	521	Specific	212.87	116.93	116.93	5.25	175	>sp|P01266|THYG_HUMAN Thyroglobulin OS=Homo sapiens OX=9606 GN=TG PE=1 SV=5	17152	20210911_zy_tissue_ethcd_1.9891.9891.3	controllerType=0 controllerNumber=1 scan=9891	44.6404
08859:3	1	K.PLSVGLDSN[+3007.058]SSTGTPEAAK.K	HexNAc(5)Hex(6)Fuc(1)NeuAc(3)	N[+3007]	1613.33	3	4837.96	4837.97	0	-0.7	521	Specific	213.65	107.83	107.83	5.39	175	>sp|P01266|THYG_HUMAN Thyroglobulin OS=Homo sapiens OX=9606 GN=TG PE=1 SV=5	17152	20210911_zy_tissue_ethcd_1.9740.9740.3	controllerType=0 controllerNumber=1 scan=9740	43.9521
03755:3	1	K.PLSVGLDSN[+1768.640]SSTGTPEAAK.K	HexNAc(4)Hex(5)Fuc(1)	N[+1769]	1200.52	3	3599.55	3599.55	0	-0.5	521	Specific	215.55	124.82	124.82	5.39	175	>sp|P01266|THYG_HUMAN Thyroglobulin OS=Homo sapiens OX=9606 GN=TG PE=1 SV=5	17152	20210911_zy_tissue_ethcd_1.4138.4138.3	controllerType=0 controllerNumber=1 scan=4138	18.8371
09020:3	1	K.PLSVGLDSN[+3226.132]SSTGTPEAAK.K	HexNAc(6)Hex(7)NeuAc(3)	N[+3226]	1686.69	3	5058.06	5057.04	1	3.2	521	Specific	217.7	131.08	131.08	4.55	175	>sp|P01266|THYG_HUMAN Thyroglobulin OS=Homo sapiens OX=9606 GN=TG PE=1 SV=5	17152	20210911_zy_tissue_ethcd_1.9917.9917.3	controllerType=0 controllerNumber=1 scan=9917	44.7563
07170:3	1	K.PLSVGLDSN[+2919.042]SSTGTPEAAK.K	HexNAc(6)Hex(6)Fuc(1)NeuAc(2)	N[+2919]	1583.99	3	4749.95	4749.95	0	0.7	521	Specific	217.96	125.4	125.4	4.74	175	>sp|P01266|THYG_HUMAN Thyroglobulin OS=Homo sapiens OX=9606 GN=TG PE=1 SV=5	17152	20210911_zy_tissue_ethcd_1.7886.7886.3	controllerType=0 controllerNumber=1 scan=7886	35.6201
08733:3	1	K.PLSVGLDSN[+3007.058]SSTGTPEAAK.K	HexNAc(5)Hex(6)Fuc(1)NeuAc(3)	N[+3007]	1613.33	3	4837.96	4837.97	0	-0.8	521	Specific	222.1	128.88	128.88	7.16	175	>sp|P01266|THYG_HUMAN Thyroglobulin OS=Homo sapiens OX=9606 GN=TG PE=1 SV=5	17152	20210911_zy_tissue_ethcd_1.9601.9601.3	controllerType=0 controllerNumber=1 scan=9601	43.3276
06605:4	1	K.PLSVGLDSN[+2715.963]SSTGTPEAAK.K	HexNAc(5)Hex(6)Fuc(1)NeuAc(2)	N[+2716]	1137.47	4	4546.86	4546.87	0	-2.4	521	Specific	222.51	161.33	161.33	7.55	175	>sp|P01266|THYG_HUMAN Thyroglobulin OS=Homo sapiens OX=9606 GN=TG PE=1 SV=5	17152	20210911_zy_tissue_ethcd_1.7266.7266.4	controllerType=0 controllerNumber=1 scan=7266	32.8123
03382:3	1	K.PLSVGLDSN[+2498.904]SSTGTPEAAK.K	HexNAc(6)Hex(7)Fuc(1)	N[+2499]	1443.6	3	4328.8	4329.81	-1	-2.1	521	Specific	224.95	119.1	119.1	7.04	175	>sp|P01266|THYG_HUMAN Thyroglobulin OS=Homo sapiens OX=9606 GN=TG PE=1 SV=5	17152	20210911_zy_tissue_ethcd_1.3729.3729.3	controllerType=0 controllerNumber=1 scan=3729	17.0032
07219:3	1	K.PLSVGLDSN[+2424.867]SSTGTPEAAK.K	HexNAc(5)Hex(6)Fuc(1)NeuAc(1)	N[+2425]	1419.59	3	4256.76	4255.78	1	-3.2	521	Specific	233.2	122.42	122.42	7.01	175	>sp|P01266|THYG_HUMAN Thyroglobulin OS=Homo sapiens OX=9606 GN=TG PE=1 SV=5	17152	20210911_zy_tissue_ethcd_1.7940.7940.3	controllerType=0 controllerNumber=1 scan=7940	35.8627
03818:3	1	K.PLSVGLDSN[+1768.640]SSTGTPEAAK.K	HexNAc(4)Hex(5)Fuc(1)	N[+1769]	1200.52	3	3599.53	3599.55	0	-4	521	Specific	236.27	160.2	160.2	6.91	175	>sp|P01266|THYG_HUMAN Thyroglobulin OS=Homo sapiens OX=9606 GN=TG PE=1 SV=5	17152	20210911_zy_tissue_ethcd_1.4207.4207.3	controllerType=0 controllerNumber=1 scan=4207	19.152
06971:3	1	K.PLSVGLDSN[+2715.963]SSTGTPEAAK.K	HexNAc(5)Hex(6)Fuc(1)NeuAc(2)	N[+2716]	1515.96	3	4545.86	4546.87	-1	-2.5	521	Specific	236.8	127.54	127.54	7.09	175	>sp|P01266|THYG_HUMAN Thyroglobulin OS=Homo sapiens OX=9606 GN=TG PE=1 SV=5	17152	20210911_zy_tissue_ethcd_1.7668.7668.3	controllerType=0 controllerNumber=1 scan=7668	34.6379
06993:3	1	K.PLSVGLDSN[+2715.963]SSTGTPEAAK.K	HexNAc(5)Hex(6)Fuc(1)NeuAc(2)	N[+2716]	1516.3	3	4546.87	4546.87	0	0.5	521	Specific	237	134.21	134.21	6.62	175	>sp|P01266|THYG_HUMAN Thyroglobulin OS=Homo sapiens OX=9606 GN=TG PE=1 SV=5	17152	20210911_zy_tissue_ethcd_1.7692.7692.3	controllerType=0 controllerNumber=1 scan=7692	34.7529
06940:3	1	K.PLSVGLDSN[+2350.830]SSTGTPEAAK.K	HexNAc(4)Hex(5)Fuc(1)NeuAc(2)	N[+2351]	1394.58	3	4181.74	4181.74	0	-0.5	521	Specific	237.34	156.53	156.53	6.91	175	>sp|P01266|THYG_HUMAN Thyroglobulin OS=Homo sapiens OX=9606 GN=TG PE=1 SV=5	17152	20210911_zy_tissue_ethcd_1.7634.7634.2	controllerType=0 controllerNumber=1 scan=7634	34.4859
03400:3	1	K.PLSVGLDSN[+2498.904]SSTGTPEAAK.K	HexNAc(6)Hex(7)Fuc(1)	N[+2499]	1443.94	3	4329.82	4329.81	0	1.2	521	Specific	238.73	137.77	137.77	6.35	175	>sp|P01266|THYG_HUMAN Thyroglobulin OS=Homo sapiens OX=9606 GN=TG PE=1 SV=5	17152	20210911_zy_tissue_ethcd_1.3749.3749.3	controllerType=0 controllerNumber=1 scan=3749	17.0965
06626:3	1	K.PLSVGLDSN[+2350.830]SSTGTPEAAK.K	HexNAc(4)Hex(5)Fuc(1)NeuAc(2)	N[+2351]	1394.25	3	4180.73	4181.74	-1	-1.6	521	Specific	241.25	108.58	108.58	7.05	175	>sp|P01266|THYG_HUMAN Thyroglobulin OS=Homo sapiens OX=9606 GN=TG PE=1 SV=5	17152	20210911_zy_tissue_ethcd_1.7289.7289.3	controllerType=0 controllerNumber=1 scan=7289	32.9158
03588:3	1	K.PLSVGLDSN[+1768.640]SSTGTPEAAK.K	HexNAc(4)Hex(5)Fuc(1)	N[+1769]	1200.52	3	3599.54	3599.55	0	-1.9	521	Specific	241.58	135.39	135.39	7.24	175	>sp|P01266|THYG_HUMAN Thyroglobulin OS=Homo sapiens OX=9606 GN=TG PE=1 SV=5	17152	20210911_zy_tissue_ethcd_1.3955.3955.3	controllerType=0 controllerNumber=1 scan=3955	18.0193
04764:4	1	K.PLSVGLDSN[+2789.999]SSTGTPEAAK.K	HexNAc(6)Hex(7)Fuc(1)NeuAc(1)	N[+2790]	1155.98	4	4620.9	4620.91	0	-1.2	521	Specific	245.18	189.66	189.66	7.43	175	>sp|P01266|THYG_HUMAN Thyroglobulin OS=Homo sapiens OX=9606 GN=TG PE=1 SV=5	17152	20210911_zy_tissue_ethcd_1.5245.5245.4	controllerType=0 controllerNumber=1 scan=5245	23.8513
03516:3	1	K.PLSVGLDSN[+1540.529]SSTGTPEAAK.K	HexNAc(2)Hex(7)	N[+1541]	1124.48	3	3371.43	3371.44	0	-2.1	521	Specific	246.72	202.24	202.24	7.26	175	>sp|P01266|THYG_HUMAN Thyroglobulin OS=Homo sapiens OX=9606 GN=TG PE=1 SV=5	17152	20210911_zy_tissue_ethcd_1.3876.3876.3	controllerType=0 controllerNumber=1 scan=3876	17.6709
04872:3	1	K.PLSVGLDSN[+2221.788]SSTGTPEAAK.K	HexNAc(4)Hex(6)Fuc(1)NeuAc(1)	N[+2222]	1351.58	3	4052.71	4052.7	0	4.1	521	Specific	248.85	136.12	136.12	6.02	175	>sp|P01266|THYG_HUMAN Thyroglobulin OS=Homo sapiens OX=9606 GN=TG PE=1 SV=5	17152	20210911_zy_tissue_ethcd_1.5363.5363.3	controllerType=0 controllerNumber=1 scan=5363	24.3725
06876:3	1	K.PLSVGLDSN[+2350.830]SSTGTPEAAK.K	HexNAc(4)Hex(5)Fuc(1)NeuAc(2)	N[+2351]	1394.58	3	4181.73	4181.74	0	-1.7	521	Specific	252.68	135.97	135.97	7.26	175	>sp|P01266|THYG_HUMAN Thyroglobulin OS=Homo sapiens OX=9606 GN=TG PE=1 SV=5	17152	20210911_zy_tissue_ethcd_1.7564.7564.2	controllerType=0 controllerNumber=1 scan=7564	34.1657
03525:3	1	K.PLSVGLDSN[+1540.529]SSTGTPEAAK.K	HexNAc(2)Hex(7)	N[+1541]	1124.49	3	3371.44	3371.44	0	1.3	521	Specific	256.34	229.56	229.56	6.24	175	>sp|P01266|THYG_HUMAN Thyroglobulin OS=Homo sapiens OX=9606 GN=TG PE=1 SV=5	17152	20210911_zy_tissue_ethcd_1.3886.3886.3	controllerType=0 controllerNumber=1 scan=3886	17.7132
07003:3	1	K.PLSVGLDSN[+2919.042]SSTGTPEAAK.K	HexNAc(6)Hex(6)Fuc(1)NeuAc(2)	N[+2919]	1583.66	3	4748.96	4749.95	-1	2.4	521	Specific	262.41	172.22	172.22	5.84	175	>sp|P01266|THYG_HUMAN Thyroglobulin OS=Homo sapiens OX=9606 GN=TG PE=1 SV=5	17152	20210911_zy_tissue_ethcd_1.7703.7703.3	controllerType=0 controllerNumber=1 scan=7703	34.8024
07240:3	1	K.PLSVGLDSN[+2553.910]SSTGTPEAAK.K	HexNAc(5)Hex(5)Fuc(1)NeuAc(2)	N[+2554]	1462.28	3	4384.82	4384.82	0	0.3	521	Specific	269.39	159.53	159.53	6.64	175	>sp|P01266|THYG_HUMAN Thyroglobulin OS=Homo sapiens OX=9606 GN=TG PE=1 SV=5	17152	20210911_zy_tissue_ethcd_1.7963.7963.3	controllerType=0 controllerNumber=1 scan=7963	35.9658
06596:3	1	K.PLSVGLDSN[+2350.830]SSTGTPEAAK.K	HexNAc(4)Hex(5)Fuc(1)NeuAc(2)	N[+2351]	1394.58	3	4181.74	4181.74	0	-0.6	521	Specific	272.27	156.04	156.04	6.96	175	>sp|P01266|THYG_HUMAN Thyroglobulin OS=Homo sapiens OX=9606 GN=TG PE=1 SV=5	17152	20210911_zy_tissue_ethcd_1.7256.7256.3	controllerType=0 controllerNumber=1 scan=7256	32.7685
06822:3	1	K.PLSVGLDSN[+2919.042]SSTGTPEAAK.K	HexNAc(6)Hex(6)Fuc(1)NeuAc(2)	N[+2919]	1583.99	3	4749.96	4749.95	0	2	521	Specific	274.71	175.3	175.3	5.74	175	>sp|P01266|THYG_HUMAN Thyroglobulin OS=Homo sapiens OX=9606 GN=TG PE=1 SV=5	17152	20210911_zy_tissue_ethcd_1.7504.7504.3	controllerType=0 controllerNumber=1 scan=7504	33.8974
03537:3	1	K.PLSVGLDSN[+1768.640]SSTGTPEAAK.K	HexNAc(4)Hex(5)Fuc(1)	N[+1769]	1200.52	3	3599.54	3599.55	0	-2.8	521	Specific	276.9	213.57	213.57	6.97	175	>sp|P01266|THYG_HUMAN Thyroglobulin OS=Homo sapiens OX=9606 GN=TG PE=1 SV=5	17152	20210911_zy_tissue_ethcd_1.3899.3899.3	controllerType=0 controllerNumber=1 scan=3899	17.7714
03462:3	1	K.PLSVGLDSN[+1864.634]SSTGTPEAAK.K	HexNAc(2)Hex(9)	N[+1865]	1232.52	3	3695.55	3695.54	0	1.4	521	Specific	283.09	195.91	195.91	6.41	175	>sp|P01266|THYG_HUMAN Thyroglobulin OS=Homo sapiens OX=9606 GN=TG PE=1 SV=5	17152	20210911_zy_tissue_ethcd_1.3817.3817.3	controllerType=0 controllerNumber=1 scan=3817	17.4065
07331:3	1	K.PLSVGLDSN[+2350.830]SSTGTPEAAK.K	HexNAc(4)Hex(5)Fuc(1)NeuAc(2)	N[+2351]	1394.58	3	4181.74	4181.74	0	0.3	521	Specific	285.43	164.37	164.37	6.69	175	>sp|P01266|THYG_HUMAN Thyroglobulin OS=Homo sapiens OX=9606 GN=TG PE=1 SV=5	17152	20210911_zy_tissue_ethcd_1.8063.8063.3	controllerType=0 controllerNumber=1 scan=8063	36.417
04935:3	1	K.PLSVGLDSN[+2204.772]SSTGTPEAAK.K	HexNAc(4)Hex(5)NeuAc(2)	N[+2205]	1346.24	3	4036.7	4035.68	1	4	521	Specific	304.68	196.33	196.33	6.1	175	>sp|P01266|THYG_HUMAN Thyroglobulin OS=Homo sapiens OX=9606 GN=TG PE=1 SV=5	17152	20210911_zy_tissue_ethcd_1.5432.5432.3	controllerType=0 controllerNumber=1 scan=5432	24.6822
06898:4	1	K.PLSVGLDSN[+2919.042]SSTGTPEAAK.K	HexNAc(6)Hex(6)Fuc(1)NeuAc(2)	N[+2919]	1188.24	4	4749.94	4749.95	0	-2.3	521	Specific	304.91	207.27	207.27	7.67	175	>sp|P01266|THYG_HUMAN Thyroglobulin OS=Homo sapiens OX=9606 GN=TG PE=1 SV=5	17152	20210911_zy_tissue_ethcd_1.7588.7588.4	controllerType=0 controllerNumber=1 scan=7588	34.2779
04826:3	1	K.PLSVGLDSN[+2569.905]SSTGTPEAAK.K	HexNAc(5)Hex(6)NeuAc(2)	N[+2570]	1467.62	3	4400.83	4400.81	0	5	521	Specific	311.67	202.32	202.32	6.38	175	>sp|P01266|THYG_HUMAN Thyroglobulin OS=Homo sapiens OX=9606 GN=TG PE=1 SV=5	17152	20210911_zy_tissue_ethcd_1.5312.5312.3	controllerType=0 controllerNumber=1 scan=5312	24.1513
04862:3	1	K.PLSVGLDSN[+2204.772]SSTGTPEAAK.K	HexNAc(4)Hex(5)NeuAc(2)	N[+2205]	1346.24	3	4036.69	4035.68	1	1.9	521	Specific	316.57	181.94	181.94	5.78	175	>sp|P01266|THYG_HUMAN Thyroglobulin OS=Homo sapiens OX=9606 GN=TG PE=1 SV=5	17152	20210911_zy_tissue_ethcd_1.5352.5352.3	controllerType=0 controllerNumber=1 scan=5352	24.3245
07030:3	1	K.PLSVGLDSN[+2553.910]SSTGTPEAAK.K	HexNAc(5)Hex(5)Fuc(1)NeuAc(2)	N[+2554]	1462.28	3	4384.81	4384.82	0	-0.7	521	Specific	317.86	204.93	204.93	7.04	175	>sp|P01266|THYG_HUMAN Thyroglobulin OS=Homo sapiens OX=9606 GN=TG PE=1 SV=5	17152	20210911_zy_tissue_ethcd_1.7733.7733.3	controllerType=0 controllerNumber=1 scan=7733	34.9403
06708:4	1	K.PLSVGLDSN[+3284.174]SSTGTPEAAK.K	HexNAc(7)Hex(7)Fuc(1)NeuAc(2)	N[+3284]	1279.52	4	5115.07	5115.08	0	-2.9	521	Specific	324.06	239.39	239.39	7.47	175	>sp|P01266|THYG_HUMAN Thyroglobulin OS=Homo sapiens OX=9606 GN=TG PE=1 SV=5	17152	20210911_zy_tissue_ethcd_1.7379.7379.4	controllerType=0 controllerNumber=1 scan=7379	33.3304
04921:4	1	K.PLSVGLDSN[+2059.735]SSTGTPEAAK.K	HexNAc(4)Hex(5)Fuc(1)NeuAc(1)	N[+2060]	973.416	4	3890.64	3890.64	0	0.2	521	Specific	328	254.58	254.58	6.7	175	>sp|P01266|THYG_HUMAN Thyroglobulin OS=Homo sapiens OX=9606 GN=TG PE=1 SV=5	17152	20210911_zy_tissue_ethcd_1.5416.5416.4	controllerType=0 controllerNumber=1 scan=5416	24.6093
06908:3	1	K.PLSVGLDSN[+2715.963]SSTGTPEAAK.K	HexNAc(5)Hex(6)Fuc(1)NeuAc(2)	N[+2716]	1515.96	3	4545.87	4546.87	-1	-0.3	521	Specific	339.82	246.34	246.34	6.95	175	>sp|P01266|THYG_HUMAN Thyroglobulin OS=Homo sapiens OX=9606 GN=TG PE=1 SV=5	17152	20210911_zy_tissue_ethcd_1.7599.7599.3	controllerType=0 controllerNumber=1 scan=7599	34.3304
03628:3	1	K.PLSVGLDSN[+1768.640]SSTGTPEAAK.K	HexNAc(4)Hex(5)Fuc(1)	N[+1769]	1200.52	3	3599.54	3599.55	0	-2.2	521	Specific	357.31	253.98	253.98	7.5	175	>sp|P01266|THYG_HUMAN Thyroglobulin OS=Homo sapiens OX=9606 GN=TG PE=1 SV=5	17152	20210911_zy_tissue_ethcd_1.3999.3999.3	controllerType=0 controllerNumber=1 scan=3999	18.2147
07259:3	1	K.PLSVGLDSN[+2350.830]SSTGTPEAAK.K	HexNAc(4)Hex(5)Fuc(1)NeuAc(2)	N[+2351]	1394.92	3	4182.73	4181.74	1	-2.3	521	Specific	378.45	254.27	58.81	7.44	175	>sp|P01266|THYG_HUMAN Thyroglobulin OS=Homo sapiens OX=9606 GN=TG PE=1 SV=5	17152	20210911_zy_tissue_ethcd_1.7984.7984.3	controllerType=0 controllerNumber=1 scan=7984	36.0599
03500:3	1	K.PLSVGLDSN[+2133.772]SSTGTPEAAK.K	HexNAc(5)Hex(6)Fuc(1)	N[+2134]	1322.23	3	3964.68	3964.68	0	0.2	521	Specific	379.12	268.64	268.64	6.83	175	>sp|P01266|THYG_HUMAN Thyroglobulin OS=Homo sapiens OX=9606 GN=TG PE=1 SV=5	17152	20210911_zy_tissue_ethcd_1.3859.3859.3	controllerType=0 controllerNumber=1 scan=3859	17.5945
09051:4	1	K.PLSVGLDSN[+3210.137]SSTGTPEAAK.K	HexNAc(6)Hex(6)Fuc(1)NeuAc(3)	N[+3210]	1261.01	4	5041.03	5041.05	0	-2.6	521	Specific	392.33	312.78	312.78	7.84	175	>sp|P01266|THYG_HUMAN Thyroglobulin OS=Homo sapiens OX=9606 GN=TG PE=1 SV=5	17152	20210911_zy_tissue_ethcd_1.9951.9951.4	controllerType=0 controllerNumber=1 scan=9951	44.9112
07189:3	1	K.PLSVGLDSN[+2350.830]SSTGTPEAAK.K	HexNAc(4)Hex(5)Fuc(1)NeuAc(2)	N[+2351]	1394.58	3	4181.74	4181.74	0	0.2	521	Specific	392.4	255.04	255.04	6.87	175	>sp|P01266|THYG_HUMAN Thyroglobulin OS=Homo sapiens OX=9606 GN=TG PE=1 SV=5	17152	20210911_zy_tissue_ethcd_1.7907.7907.3	controllerType=0 controllerNumber=1 scan=7907	35.7133
06749:3	1	K.PLSVGLDSN[+2715.963]SSTGTPEAAK.K	HexNAc(5)Hex(6)Fuc(1)NeuAc(2)	N[+2716]	1516.3	3	4546.88	4546.87	0	1.4	521	Specific	402.19	279.62	279.62	6.58	175	>sp|P01266|THYG_HUMAN Thyroglobulin OS=Homo sapiens OX=9606 GN=TG PE=1 SV=5	17152	20210911_zy_tissue_ethcd_1.7424.7424.3	controllerType=0 controllerNumber=1 scan=7424	33.5381
04662:3	1	K.PLSVGLDSN[+2789.999]SSTGTPEAAK.K	HexNAc(6)Hex(7)Fuc(1)NeuAc(1)	N[+2790]	1540.64	3	4619.91	4620.91	-1	1.2	521	Specific	406.71	303.09	303.09	6.49	175	>sp|P01266|THYG_HUMAN Thyroglobulin OS=Homo sapiens OX=9606 GN=TG PE=1 SV=5	17152	20210911_zy_tissue_ethcd_1.5133.5133.3	controllerType=0 controllerNumber=1 scan=5133	23.3537
06686:3	1	K.PLSVGLDSN[+2715.963]SSTGTPEAAK.K	HexNAc(5)Hex(6)Fuc(1)NeuAc(2)	N[+2716]	1516.3	3	4546.88	4546.87	0	1.3	521	Specific	409.71	302.06	302.06	6.63	175	>sp|P01266|THYG_HUMAN Thyroglobulin OS=Homo sapiens OX=9606 GN=TG PE=1 SV=5	17152	20210911_zy_tissue_ethcd_1.7355.7355.3	controllerType=0 controllerNumber=1 scan=7355	33.2169
06727:3	1	K.PLSVGLDSN[+2350.830]SSTGTPEAAK.K	HexNAc(4)Hex(5)Fuc(1)NeuAc(2)	N[+2351]	1394.58	3	4181.74	4181.74	0	-0.4	521	Specific	418.86	285.41	285.41	7.06	175	>sp|P01266|THYG_HUMAN Thyroglobulin OS=Homo sapiens OX=9606 GN=TG PE=1 SV=5	17152	20210911_zy_tissue_ethcd_1.7400.7400.3	controllerType=0 controllerNumber=1 scan=7400	33.4235
04721:3	1	K.PLSVGLDSN[+2789.999]SSTGTPEAAK.K	HexNAc(6)Hex(7)Fuc(1)NeuAc(1)	N[+2790]	1540.64	3	4619.91	4620.91	-1	1.1	521	Specific	432.51	325.01	325.01	6.65	175	>sp|P01266|THYG_HUMAN Thyroglobulin OS=Homo sapiens OX=9606 GN=TG PE=1 SV=5	17152	20210911_zy_tissue_ethcd_1.5198.5198.3	controllerType=0 controllerNumber=1 scan=5198	23.6442
06835:3	1	K.PLSVGLDSN[+2715.963]SSTGTPEAAK.K	HexNAc(5)Hex(6)Fuc(1)NeuAc(2)	N[+2716]	1516.29	3	4546.86	4546.87	0	-2.5	521	Specific	444.5	328.7	328.7	7.66	175	>sp|P01266|THYG_HUMAN Thyroglobulin OS=Homo sapiens OX=9606 GN=TG PE=1 SV=5	17152	20210911_zy_tissue_ethcd_1.7519.7519.3	controllerType=0 controllerNumber=1 scan=7519	33.963
04934:2	1	K.PLSVGLDSN[+2059.735]SSTGTPEAAK.K	HexNAc(4)Hex(5)Fuc(1)NeuAc(1)	N[+2060]	1945.82	2	3890.64	3890.64	0	-1.9	521	Specific	450.42	319.82	319.82	7.94	175	>sp|P01266|THYG_HUMAN Thyroglobulin OS=Homo sapiens OX=9606 GN=TG PE=1 SV=5	17152	20210911_zy_tissue_ethcd_1.5430.5430.4	controllerType=0 controllerNumber=1 scan=5430	24.6765
04861:3	1	K.PLSVGLDSN[+2059.735]SSTGTPEAAK.K	HexNAc(4)Hex(5)Fuc(1)NeuAc(1)	N[+2060]	1297.55	3	3890.64	3890.64	0	-1.3	521	Specific	456.69	304.05	304.05	7.46	175	>sp|P01266|THYG_HUMAN Thyroglobulin OS=Homo sapiens OX=9606 GN=TG PE=1 SV=5	17152	20210911_zy_tissue_ethcd_1.5351.5351.3	controllerType=0 controllerNumber=1 scan=5351	24.3196
04692:3	1	K.PLSVGLDSN[+2424.867]SSTGTPEAAK.K	HexNAc(5)Hex(6)Fuc(1)NeuAc(1)	N[+2425]	1419.26	3	4255.77	4255.78	0	-1.2	521	Specific	475.59	333.93	333.93	7.64	175	>sp|P01266|THYG_HUMAN Thyroglobulin OS=Homo sapiens OX=9606 GN=TG PE=1 SV=5	17152	20210911_zy_tissue_ethcd_1.5166.5166.3	controllerType=0 controllerNumber=1 scan=5166	23.5023
03608:3	1	K.PLSVGLDSN[+1971.719]SSTGTPEAAK.K	HexNAc(5)Hex(5)Fuc(1)	N[+1972]	1268.21	3	3802.62	3802.63	0	-1.4	521	Specific	493.48	346.92	346.92	7.87	175	>sp|P01266|THYG_HUMAN Thyroglobulin OS=Homo sapiens OX=9606 GN=TG PE=1 SV=5	17152	20210911_zy_tissue_ethcd_1.3977.3977.3	controllerType=0 controllerNumber=1 scan=3977	18.1167
06927:3	1	K.PLSVGLDSN[+2350.830]SSTGTPEAAK.K	HexNAc(4)Hex(5)Fuc(1)NeuAc(2)	N[+2351]	1394.58	3	4181.73	4181.74	0	-1.7	521	Specific	506.11	374.26	374.26	7.99	175	>sp|P01266|THYG_HUMAN Thyroglobulin OS=Homo sapiens OX=9606 GN=TG PE=1 SV=5	17152	20210911_zy_tissue_ethcd_1.7620.7620.3	controllerType=0 controllerNumber=1 scan=7620	34.4255
05467:3	1	K.PLSVGLDSN[+2059.735]SSTGTPEAAK.K	HexNAc(4)Hex(5)Fuc(1)NeuAc(1)	N[+2060]	1297.55	3	3890.64	3890.64	0	-1.5	521	Specific	507.2	332.16	332.16	7.73	175	>sp|P01266|THYG_HUMAN Thyroglobulin OS=Homo sapiens OX=9606 GN=TG PE=1 SV=5	17152	20210911_zy_tissue_ethcd_1.6017.6017.3	controllerType=0 controllerNumber=1 scan=6017	27.1492
03451:3	1	K.PLSVGLDSN[+1864.634]SSTGTPEAAK.K	HexNAc(2)Hex(9)	N[+1865]	1232.52	3	3695.55	3695.54	0	1.2	521	Specific	532.95	428.8	428.8	8.25	175	>sp|P01266|THYG_HUMAN Thyroglobulin OS=Homo sapiens OX=9606 GN=TG PE=1 SV=5	17152	20210911_zy_tissue_ethcd_1.3805.3805.3	controllerType=0 controllerNumber=1 scan=3805	17.3536
05085:3	1	K.PLSVGLDSN[+2059.735]SSTGTPEAAK.K	HexNAc(4)Hex(5)Fuc(1)NeuAc(1)	N[+2060]	1297.56	3	3890.66	3890.64	0	3.2	521	Specific	536.41	352.65	352.65	6.85	175	>sp|P01266|THYG_HUMAN Thyroglobulin OS=Homo sapiens OX=9606 GN=TG PE=1 SV=5	17152	20210911_zy_tissue_ethcd_1.5598.5598.3	controllerType=0 controllerNumber=1 scan=5598	25.3539
06856:3	1	K.PLSVGLDSN[+2350.830]SSTGTPEAAK.K	HexNAc(4)Hex(5)Fuc(1)NeuAc(2)	N[+2351]	1394.58	3	4181.73	4181.74	0	-1.3	521	Specific	537.25	400.76	400.76	9.1	175	>sp|P01266|THYG_HUMAN Thyroglobulin OS=Homo sapiens OX=9606 GN=TG PE=1 SV=5	17152	20210911_zy_tissue_ethcd_1.7542.7542.3	controllerType=0 controllerNumber=1 scan=7542	34.0666
07060:3	1	K.PLSVGLDSN[+2350.830]SSTGTPEAAK.K	HexNAc(4)Hex(5)Fuc(1)NeuAc(2)	N[+2351]	1394.58	3	4181.73	4181.74	0	-0.8	521	Specific	537.75	377.75	377.75	8.14	175	>sp|P01266|THYG_HUMAN Thyroglobulin OS=Homo sapiens OX=9606 GN=TG PE=1 SV=5	17152	20210911_zy_tissue_ethcd_1.7766.7766.3	controllerType=0 controllerNumber=1 scan=7766	35.0863
04925:3	1	K.PLSVGLDSN[+2424.867]SSTGTPEAAK.K	HexNAc(5)Hex(6)Fuc(1)NeuAc(1)	N[+2425]	1419.26	3	4255.77	4255.78	0	-0.8	521	Specific	540.62	378	378	8.14	175	>sp|P01266|THYG_HUMAN Thyroglobulin OS=Homo sapiens OX=9606 GN=TG PE=1 SV=5	17152	20210911_zy_tissue_ethcd_1.5421.5421.3	controllerType=0 controllerNumber=1 scan=5421	24.6317
05295:3	1	K.PLSVGLDSN[+2059.735]SSTGTPEAAK.K	HexNAc(4)Hex(5)Fuc(1)NeuAc(1)	N[+2060]	1297.55	3	3890.64	3890.64	0	-1	521	Specific	584.57	399.77	399.77	10.26	175	>sp|P01266|THYG_HUMAN Thyroglobulin OS=Homo sapiens OX=9606 GN=TG PE=1 SV=5	17152	20210911_zy_tissue_ethcd_1.5829.5829.3	controllerType=0 controllerNumber=1 scan=5829	26.324
03470:3	1	K.PLSVGLDSN[+1702.581]SSTGTPEAAK.K	HexNAc(2)Hex(8)	N[+1703]	1178.5	3	3533.48	3533.49	0	-1.7	521	Specific	588.67	479.16	479.16	10.34	175	>sp|P01266|THYG_HUMAN Thyroglobulin OS=Homo sapiens OX=9606 GN=TG PE=1 SV=5	17152	20210911_zy_tissue_ethcd_1.3826.3826.3	controllerType=0 controllerNumber=1 scan=3826	17.4454
03463:3	1	K.PLSVGLDSN[+1702.581]SSTGTPEAAK.K	HexNAc(2)Hex(8)	N[+1703]	1178.5	3	3533.49	3533.49	0	-0.4	521	Specific	599.41	487.63	487.63	10.03	175	>sp|P01266|THYG_HUMAN Thyroglobulin OS=Homo sapiens OX=9606 GN=TG PE=1 SV=5	17152	20210911_zy_tissue_ethcd_1.3818.3818.3	controllerType=0 controllerNumber=1 scan=3818	17.4111
04850:3	1	K.PLSVGLDSN[+2424.867]SSTGTPEAAK.K	HexNAc(5)Hex(6)Fuc(1)NeuAc(1)	N[+2425]	1419.26	3	4255.77	4255.78	0	-0.3	521	Specific	631.05	422.97	422.97	11.03	175	>sp|P01266|THYG_HUMAN Thyroglobulin OS=Homo sapiens OX=9606 GN=TG PE=1 SV=5	17152	20210911_zy_tissue_ethcd_1.5339.5339.3	controllerType=0 controllerNumber=1 scan=5339	24.2677
07395:3	1	K.PLSVGLDSN[+2059.735]SSTGTPEAAK.K	HexNAc(4)Hex(5)Fuc(1)NeuAc(1)	N[+2060]	1297.55	3	3890.64	3890.64	0	-0.9	521	Specific	631.91	476.27	476.27	11.26	175	>sp|P01266|THYG_HUMAN Thyroglobulin OS=Homo sapiens OX=9606 GN=TG PE=1 SV=5	17152	20210911_zy_tissue_ethcd_1.8133.8133.3	controllerType=0 controllerNumber=1 scan=8133	36.7277
04945:3	1	K.PLSVGLDSN[+2059.735]SSTGTPEAAK.K	HexNAc(4)Hex(5)Fuc(1)NeuAc(1)	N[+2060]	1297.55	3	3890.64	3890.64	0	-1.1	521	Specific	632.13	466.29	466.29	11.26	175	>sp|P01266|THYG_HUMAN Thyroglobulin OS=Homo sapiens OX=9606 GN=TG PE=1 SV=5	17152	20210911_zy_tissue_ethcd_1.5443.5443.3	controllerType=0 controllerNumber=1 scan=5443	24.7323
05206:3	1	K.PLSVGLDSN[+2059.735]SSTGTPEAAK.K	HexNAc(4)Hex(5)Fuc(1)NeuAc(1)	N[+2060]	1297.55	3	3890.63	3890.64	0	-2.1	521	Specific	638.7	473.9	473.9	11.33	175	>sp|P01266|THYG_HUMAN Thyroglobulin OS=Homo sapiens OX=9606 GN=TG PE=1 SV=5	17152	20210911_zy_tissue_ethcd_1.5732.5732.3	controllerType=0 controllerNumber=1 scan=5732	25.9106
04775:3	1	K.PLSVGLDSN[+2424.867]SSTGTPEAAK.K	HexNAc(5)Hex(6)Fuc(1)NeuAc(1)	N[+2425]	1419.26	3	4255.77	4255.78	0	-0.9	521	Specific	645.26	468.39	468.39	11.26	175	>sp|P01266|THYG_HUMAN Thyroglobulin OS=Homo sapiens OX=9606 GN=TG PE=1 SV=5	17152	20210911_zy_tissue_ethcd_1.5257.5257.3	controllerType=0 controllerNumber=1 scan=5257	23.9044
03147:3	1	K.PLSVGLDSN[+2116.756]SSTGTPEAAKK.D	HexNAc(5)Hex(5)NeuAc(1)	N[+2117]	1359.26	3	4075.76	4075.76	0	-0.3	521	Specific	208.74	40.52	40.52	3.25	175	>sp|P01266|THYG_HUMAN Thyroglobulin OS=Homo sapiens OX=9606 GN=TG PE=1 SV=5	17152	20210911_zy_tissue_ethcd_1.3472.3472.3	controllerType=0 controllerNumber=1 scan=3472	15.8376
04473:3	1	K.PLSVGLDSN[+2350.830]SSTGTPEAAKK.D	HexNAc(4)Hex(5)Fuc(1)NeuAc(2)	N[+2351]	1436.95	3	4308.85	4309.83	-1	4.3	521	Specific	227.68	112.99	112.99	5.44	175	>sp|P01266|THYG_HUMAN Thyroglobulin OS=Homo sapiens OX=9606 GN=TG PE=1 SV=5	17152	20210911_zy_tissue_ethcd_1.4926.4926.3	controllerType=0 controllerNumber=1 scan=4926	22.4207
04561:3	1	K.PLSVGLDSN[+2553.910]SSTGTPEAAKK.D	HexNAc(5)Hex(5)Fuc(1)NeuAc(2)	N[+2554]	1504.98	3	4512.91	4512.91	0	0.5	521	Specific	230.42	155.77	155.77	5.93	175	>sp|P01266|THYG_HUMAN Thyroglobulin OS=Homo sapiens OX=9606 GN=TG PE=1 SV=5	17152	20210911_zy_tissue_ethcd_1.5022.5022.3	controllerType=0 controllerNumber=1 scan=5022	22.8505
03318:3	1	K.PLSVGLDSN[+2059.735]SSTGTPEAAKK.D	HexNAc(4)Hex(5)Fuc(1)NeuAc(1)	N[+2060]	1340.25	3	4018.73	4018.74	0	-1.6	521	Specific	327.08	152.16	152.16	7.07	175	>sp|P01266|THYG_HUMAN Thyroglobulin OS=Homo sapiens OX=9606 GN=TG PE=1 SV=5	17152	20210911_zy_tissue_ethcd_1.3659.3659.3	controllerType=0 controllerNumber=1 scan=3659	16.6785
03387:3	1	K.PLSVGLDSN[+2059.735]SSTGTPEAAKK.D	HexNAc(4)Hex(5)Fuc(1)NeuAc(1)	N[+2060]	1340.25	3	4018.74	4018.74	0	-0.2	521	Specific	344.63	200.95	200.95	6.79	175	>sp|P01266|THYG_HUMAN Thyroglobulin OS=Homo sapiens OX=9606 GN=TG PE=1 SV=5	17152	20210911_zy_tissue_ethcd_1.3735.3735.3	controllerType=0 controllerNumber=1 scan=3735	17.0285
03098:3	1	K.PLSVGLDSN[+2424.867]SSTGTPEAAKK.D	HexNAc(5)Hex(6)Fuc(1)NeuAc(1)	N[+2425]	1461.96	3	4383.87	4383.87	0	-0.6	521	Specific	408.45	246.72	246.72	6.8	175	>sp|P01266|THYG_HUMAN Thyroglobulin OS=Homo sapiens OX=9606 GN=TG PE=1 SV=5	17152	20210911_zy_tissue_ethcd_1.3418.3418.3	controllerType=0 controllerNumber=1 scan=3418	15.5959
02541:3	1	K.PLSVGLDSN[+1768.640]SSTGTPEAAKK.D	HexNAc(4)Hex(5)Fuc(1)	N[+1769]	1243.22	3	3727.64	3727.64	0	-0.7	521	Specific	428.73	268.28	268.28	6.76	175	>sp|P01266|THYG_HUMAN Thyroglobulin OS=Homo sapiens OX=9606 GN=TG PE=1 SV=5	17152	20210911_zy_tissue_ethcd_1.2807.2807.3	controllerType=0 controllerNumber=1 scan=2807	12.8531
03168:3	1	K.PLSVGLDSN[+2059.735]SSTGTPEAAKK.D	HexNAc(4)Hex(5)Fuc(1)NeuAc(1)	N[+2060]	1340.25	3	4018.73	4018.74	0	-1	521	Specific	554.96	336.25	336.25	7.55	175	>sp|P01266|THYG_HUMAN Thyroglobulin OS=Homo sapiens OX=9606 GN=TG PE=1 SV=5	17152	20210911_zy_tissue_ethcd_1.3495.3495.3	controllerType=0 controllerNumber=1 scan=3495	15.9401
02672:3	1	R.ETEEIVSASN[+2350.830]SSR.F	HexNAc(4)Hex(5)Fuc(1)NeuAc(2)	N[+2351]	1253.83	3	3759.48	3759.49	0	-0.8	938	Specific	201.29	51.1	51.1	4.07	175	>sp|P01266|THYG_HUMAN Thyroglobulin OS=Homo sapiens OX=9606 GN=TG PE=1 SV=5	17152	20210911_zy_tissue_ethcd_1.2950.2950.3	controllerType=0 controllerNumber=1 scan=2950	13.5032
02856:3	1	R.ETEEIVSASN[+2350.830]SSR.F	HexNAc(4)Hex(5)Fuc(1)NeuAc(2)	N[+2351]	1253.83	3	3759.48	3759.49	0	-1	938	Specific	211.71	113.96	113.96	4.61	175	>sp|P01266|THYG_HUMAN Thyroglobulin OS=Homo sapiens OX=9606 GN=TG PE=1 SV=5	17152	20210911_zy_tissue_ethcd_1.3153.3153.3	controllerType=0 controllerNumber=1 scan=3153	14.4071
01980:3	1	R.ETEEIVSASN[+2424.867]SSR.F	HexNAc(5)Hex(6)Fuc(1)NeuAc(1)	N[+2425]	1278.51	3	3833.52	3833.52	0	-0.7	938	Specific	213.7	102.24	102.24	4.67	175	>sp|P01266|THYG_HUMAN Thyroglobulin OS=Homo sapiens OX=9606 GN=TG PE=1 SV=5	17152	20210911_zy_tissue_ethcd_1.2191.2191.3	controllerType=0 controllerNumber=1 scan=2191	10.0737
02836:3	1	R.ETEEIVSASN[+2919.042]SSR.F	HexNAc(6)Hex(6)Fuc(1)NeuAc(2)	N[+2919]	1442.9	3	4326.69	4327.7	-1	-0.9	938	Specific	244.79	118.45	118.45	6.34	175	>sp|P01266|THYG_HUMAN Thyroglobulin OS=Homo sapiens OX=9606 GN=TG PE=1 SV=5	17152	20210911_zy_tissue_ethcd_1.3131.3131.3	controllerType=0 controllerNumber=1 scan=3131	14.3093
02070:3	1	R.ETEEIVSASN[+1872.651]SSR.F	HexNAc(3)Hex(6)NeuAc(1)	N[+1873]	1094.44	3	3281.3	3281.31	0	-0.9	938	Specific	261.7	94.97	94.97	6.4	175	>sp|P01266|THYG_HUMAN Thyroglobulin OS=Homo sapiens OX=9606 GN=TG PE=1 SV=5	17152	20210911_zy_tissue_ethcd_1.2290.2290.3	controllerType=0 controllerNumber=1 scan=2290	10.5099
02124:3	1	R.ETEEIVSASN[+1897.682]SSR.F	HexNAc(4)Hex(4)Fuc(1)NeuAc(1)	N[+1898]	1102.78	3	3306.33	3306.34	0	-3.5	938	Specific	271.29	108.71	108.71	6.27	175	>sp|P01266|THYG_HUMAN Thyroglobulin OS=Homo sapiens OX=9606 GN=TG PE=1 SV=5	17152	20210911_zy_tissue_ethcd_1.2349.2349.3	controllerType=0 controllerNumber=1 scan=2349	10.7669
02732:3	1	R.ETEEIVSASN[+2715.963]SSR.F	HexNAc(5)Hex(6)Fuc(1)NeuAc(2)	N[+2716]	1375.54	3	4124.61	4124.62	0	-0.9	938	Specific	271.8	107.88	107.88	6.51	175	>sp|P01266|THYG_HUMAN Thyroglobulin OS=Homo sapiens OX=9606 GN=TG PE=1 SV=5	17152	20210911_zy_tissue_ethcd_1.3016.3016.3	controllerType=0 controllerNumber=1 scan=3016	13.7969
03073:3	1	R.ETEEIVSASN[+2059.735]SSR.F	HexNAc(4)Hex(5)Fuc(1)NeuAc(1)	N[+2060]	1156.8	3	3468.39	3468.39	0	1.3	938	Specific	286.32	115.38	115.38	5.75	175	>sp|P01266|THYG_HUMAN Thyroglobulin OS=Homo sapiens OX=9606 GN=TG PE=1 SV=5	17152	20210911_zy_tissue_ethcd_1.3390.3390.3	controllerType=0 controllerNumber=1 scan=3390	15.4712
02083:3	1	R.ETEEIVSASN[+2262.814]SSR.F	HexNAc(5)Hex(5)Fuc(1)NeuAc(1)	N[+2263]	1224.49	3	3671.46	3671.47	0	-2.9	938	Specific	290.34	114.01	114.01	6.45	175	>sp|P01266|THYG_HUMAN Thyroglobulin OS=Homo sapiens OX=9606 GN=TG PE=1 SV=5	17152	20210911_zy_tissue_ethcd_1.2304.2304.3	controllerType=0 controllerNumber=1 scan=2304	10.5729
02166:3	1	R.ETEEIVSASN[+2059.735]SSR.F	HexNAc(4)Hex(5)Fuc(1)NeuAc(1)	N[+2060]	1156.8	3	3468.39	3468.39	0	-1.2	938	Specific	315.29	196.16	196.16	6.61	175	>sp|P01266|THYG_HUMAN Thyroglobulin OS=Homo sapiens OX=9606 GN=TG PE=1 SV=5	17152	20210911_zy_tissue_ethcd_1.2395.2395.3	controllerType=0 controllerNumber=1 scan=2395	10.9701
03230:3	1	R.ETEEIVSASN[+1768.640]SSR.F	HexNAc(4)Hex(5)Fuc(1)	N[+1769]	1059.77	3	3177.3	3177.29	0	3.3	938	Specific	324.56	195.96	195.96	5.49	175	>sp|P01266|THYG_HUMAN Thyroglobulin OS=Homo sapiens OX=9606 GN=TG PE=1 SV=5	17152	20210911_zy_tissue_ethcd_1.3562.3562.3	controllerType=0 controllerNumber=1 scan=3562	16.2431
02899:3	1	R.ETEEIVSASN[+2553.910]SSR.F	HexNAc(5)Hex(5)Fuc(1)NeuAc(2)	N[+2554]	1321.53	3	3962.57	3962.56	0	0.4	938	Specific	327.21	167.14	167.14	6.12	175	>sp|P01266|THYG_HUMAN Thyroglobulin OS=Homo sapiens OX=9606 GN=TG PE=1 SV=5	17152	20210911_zy_tissue_ethcd_1.3200.3200.3	controllerType=0 controllerNumber=1 scan=3200	14.6196
02029:3	1	R.ETEEIVSASN[+2059.735]SSR.F	HexNAc(4)Hex(5)Fuc(1)NeuAc(1)	N[+2060]	1156.8	3	3468.39	3468.39	0	1.4	938	Specific	345.73	195.34	195.34	5.89	175	>sp|P01266|THYG_HUMAN Thyroglobulin OS=Homo sapiens OX=9606 GN=TG PE=1 SV=5	17152	20210911_zy_tissue_ethcd_1.2245.2245.3	controllerType=0 controllerNumber=1 scan=2245	10.3191
02063:3	1	R.ETEEIVSASN[+2075.730]SSR.F	HexNAc(4)Hex(6)NeuAc(1)	N[+2076]	1162.13	3	3484.37	3484.38	0	-3	938	Specific	347.13	183.93	183.93	6.49	175	>sp|P01266|THYG_HUMAN Thyroglobulin OS=Homo sapiens OX=9606 GN=TG PE=1 SV=5	17152	20210911_zy_tissue_ethcd_1.2282.2282.3	controllerType=0 controllerNumber=1 scan=2282	10.479
02789:3	1	R.ETEEIVSASN[+2715.963]SSR.F	HexNAc(5)Hex(6)Fuc(1)NeuAc(2)	N[+2716]	1375.54	3	4124.61	4124.62	0	-3	938	Specific	352.89	198.13	198.13	6.65	175	>sp|P01266|THYG_HUMAN Thyroglobulin OS=Homo sapiens OX=9606 GN=TG PE=1 SV=5	17152	20210911_zy_tissue_ethcd_1.3079.3079.3	controllerType=0 controllerNumber=1 scan=3079	14.0807
02929:3	1	R.ETEEIVSASN[+2350.830]SSR.F	HexNAc(4)Hex(5)Fuc(1)NeuAc(2)	N[+2351]	1253.83	3	3759.48	3759.49	0	-1.8	938	Specific	353.65	174.44	174.44	6.72	175	>sp|P01266|THYG_HUMAN Thyroglobulin OS=Homo sapiens OX=9606 GN=TG PE=1 SV=5	17152	20210911_zy_tissue_ethcd_1.3233.3233.3	controllerType=0 controllerNumber=1 scan=3233	14.7682
02198:2	1	R.ETEEIVSASN[+1241.454]SSR.F	HexNAc(3)Hex(3)Fuc(1)	N[+1241]	1325.56	2	2650.11	2650.11	0	-1.1	938	Specific	357.41	248.23	248.23	6.98	175	>sp|P01266|THYG_HUMAN Thyroglobulin OS=Homo sapiens OX=9606 GN=TG PE=1 SV=5	17152	20210911_zy_tissue_ethcd_1.2430.2430.2	controllerType=0 controllerNumber=1 scan=2430	11.133
02021:3	1	R.ETEEIVSASN[+2789.999]SSR.F	HexNAc(6)Hex(7)Fuc(1)NeuAc(1)	N[+2790]	1400.22	3	4198.65	4198.65	0	0	938	Specific	395.97	215.21	215.21	6.04	175	>sp|P01266|THYG_HUMAN Thyroglobulin OS=Homo sapiens OX=9606 GN=TG PE=1 SV=5	17152	20210911_zy_tissue_ethcd_1.2236.2236.3	controllerType=0 controllerNumber=1 scan=2236	10.2799
02794:3	1	R.ETEEIVSASN[+2204.772]SSR.F	HexNAc(4)Hex(5)NeuAc(2)	N[+2205]	1205.15	3	3613.43	3613.43	0	-0.7	938	Specific	415.12	243.03	243.03	6.38	175	>sp|P01266|THYG_HUMAN Thyroglobulin OS=Homo sapiens OX=9606 GN=TG PE=1 SV=5	17152	20210911_zy_tissue_ethcd_1.3085.3085.3	controllerType=0 controllerNumber=1 scan=3085	14.1062
01770:3	1	R.ETEEIVSASN[+1768.640]SSR.F	HexNAc(4)Hex(5)Fuc(1)	N[+1769]	1059.77	3	3177.29	3177.29	0	-1.3	938	Specific	421.93	302.93	302.93	6.68	175	>sp|P01266|THYG_HUMAN Thyroglobulin OS=Homo sapiens OX=9606 GN=TG PE=1 SV=5	17152	20210911_zy_tissue_ethcd_1.1961.1961.3	controllerType=0 controllerNumber=1 scan=1961	9.0452
02137:3	1	R.ETEEIVSASN[+2262.814]SSR.F	HexNAc(5)Hex(5)Fuc(1)NeuAc(1)	N[+2263]	1224.49	3	3671.46	3671.47	0	-1.3	938	Specific	425.06	241	241	6.6	175	>sp|P01266|THYG_HUMAN Thyroglobulin OS=Homo sapiens OX=9606 GN=TG PE=1 SV=5	17152	20210911_zy_tissue_ethcd_1.2363.2363.3	controllerType=0 controllerNumber=1 scan=2363	10.8243
03058:3	1	R.ETEEIVSASN[+2059.735]SSR.F	HexNAc(4)Hex(5)Fuc(1)NeuAc(1)	N[+2060]	1156.8	3	3468.4	3468.39	0	2.2	938	Specific	462.58	232.28	232.28	5.37	175	>sp|P01266|THYG_HUMAN Thyroglobulin OS=Homo sapiens OX=9606 GN=TG PE=1 SV=5	17152	20210911_zy_tissue_ethcd_1.3374.3374.3	controllerType=0 controllerNumber=1 scan=3374	15.4003
02101:3	1	R.ETEEIVSASN[+2059.735]SSR.F	HexNAc(4)Hex(5)Fuc(1)NeuAc(1)	N[+2060]	1156.8	3	3468.38	3468.39	0	-2.3	938	Specific	467.88	298.85	298.85	6.88	175	>sp|P01266|THYG_HUMAN Thyroglobulin OS=Homo sapiens OX=9606 GN=TG PE=1 SV=5	17152	20210911_zy_tissue_ethcd_1.2324.2324.3	controllerType=0 controllerNumber=1 scan=2324	10.6598
01746:3	1	R.ETEEIVSASN[+2498.904]SSR.F	HexNAc(6)Hex(7)Fuc(1)	N[+2499]	1303.19	3	3907.55	3907.56	0	-2.8	938	Specific	476.56	320.63	320.63	6.9	175	>sp|P01266|THYG_HUMAN Thyroglobulin OS=Homo sapiens OX=9606 GN=TG PE=1 SV=5	17152	20210911_zy_tissue_ethcd_1.1934.1934.3	controllerType=0 controllerNumber=1 scan=1934	8.9316
01726:3	1	R.ETEEIVSASN[+2133.772]SSR.F	HexNAc(5)Hex(6)Fuc(1)	N[+2134]	1181.48	3	3542.42	3542.43	0	-1.4	938	Specific	483.29	318.83	318.83	6.99	175	>sp|P01266|THYG_HUMAN Thyroglobulin OS=Homo sapiens OX=9606 GN=TG PE=1 SV=5	17152	20210911_zy_tissue_ethcd_1.1913.1913.3	controllerType=0 controllerNumber=1 scan=1913	8.8404
02977:3	1	R.ETEEIVSASN[+2059.735]SSR.F	HexNAc(4)Hex(5)Fuc(1)NeuAc(1)	N[+2060]	1156.8	3	3468.38	3468.39	0	-2.9	938	Specific	486.88	307.37	307.37	6.75	175	>sp|P01266|THYG_HUMAN Thyroglobulin OS=Homo sapiens OX=9606 GN=TG PE=1 SV=5	17152	20210911_zy_tissue_ethcd_1.3285.3285.3	controllerType=0 controllerNumber=1 scan=3285	14.9994
02571:3	1	R.ETEEIVSASN[+2059.735]SSR.F	HexNAc(4)Hex(5)Fuc(1)NeuAc(1)	N[+2060]	1156.8	3	3468.38	3468.39	0	-3	938	Specific	494.38	284.08	284.08	6.71	175	>sp|P01266|THYG_HUMAN Thyroglobulin OS=Homo sapiens OX=9606 GN=TG PE=1 SV=5	17152	20210911_zy_tissue_ethcd_1.2839.2839.3	controllerType=0 controllerNumber=1 scan=2839	13.0003
02033:3	1	R.ETEEIVSASN[+2789.999]SSR.F	HexNAc(6)Hex(7)Fuc(1)NeuAc(1)	N[+2790]	1399.89	3	4197.65	4198.65	-1	0.8	938	Specific	502.28	270.7	270.7	5.81	175	>sp|P01266|THYG_HUMAN Thyroglobulin OS=Homo sapiens OX=9606 GN=TG PE=1 SV=5	17152	20210911_zy_tissue_ethcd_1.2249.2249.3	controllerType=0 controllerNumber=1 scan=2249	10.3382
02066:3	1	R.ETEEIVSASN[+2221.788]SSR.F	HexNAc(4)Hex(6)Fuc(1)NeuAc(1)	N[+2222]	1210.82	3	3630.44	3630.44	0	-1.4	938	Specific	509.84	259.51	259.51	6.92	175	>sp|P01266|THYG_HUMAN Thyroglobulin OS=Homo sapiens OX=9606 GN=TG PE=1 SV=5	17152	20210911_zy_tissue_ethcd_1.2285.2285.3	controllerType=0 controllerNumber=1 scan=2285	10.4905
02092:3	1	R.ETEEIVSASN[+1913.677]SSR.F	HexNAc(4)Hex(5)NeuAc(1)	N[+1914]	1108.11	3	3322.32	3322.33	0	-4.3	938	Specific	538.49	344.43	344.43	7.15	175	>sp|P01266|THYG_HUMAN Thyroglobulin OS=Homo sapiens OX=9606 GN=TG PE=1 SV=5	17152	20210911_zy_tissue_ethcd_1.2314.2314.3	controllerType=0 controllerNumber=1 scan=2314	10.6122
01762:3	1	R.ETEEIVSASN[+1622.582]SSR.F	HexNAc(4)Hex(5)	N[+1623]	1011.08	3	3031.24	3031.24	0	-0.2	938	Specific	555.71	371.47	371.47	6.95	175	>sp|P01266|THYG_HUMAN Thyroglobulin OS=Homo sapiens OX=9606 GN=TG PE=1 SV=5	17152	20210911_zy_tissue_ethcd_1.1952.1952.3	controllerType=0 controllerNumber=1 scan=1952	9.0078
01715:3	1	R.ETEEIVSASN[+2133.772]SSR.F	HexNAc(5)Hex(6)Fuc(1)	N[+2134]	1181.48	3	3542.43	3542.43	0	-0.1	938	Specific	594.15	398.74	398.74	9.07	175	>sp|P01266|THYG_HUMAN Thyroglobulin OS=Homo sapiens OX=9606 GN=TG PE=1 SV=5	17152	20210911_zy_tissue_ethcd_1.1900.1900.3	controllerType=0 controllerNumber=1 scan=1900	8.7843
02199:3	1	R.ETEEIVSASN[+1768.640]SSR.F	HexNAc(4)Hex(5)Fuc(1)	N[+1769]	1059.77	3	3177.29	3177.29	0	-2	938	Specific	619.41	417.39	417.39	10.69	175	>sp|P01266|THYG_HUMAN Thyroglobulin OS=Homo sapiens OX=9606 GN=TG PE=1 SV=5	17152	20210911_zy_tissue_ethcd_1.2431.2431.3	controllerType=0 controllerNumber=1 scan=2431	11.1385
13592:3	1	R.ETEEIVSASN[+2059.735]SSRFPLGESFLVAK.G	HexNAc(4)Hex(5)Fuc(1)NeuAc(1)	N[+2060]	1553.02	3	4657.04	4657.04	0	-0.8	938	Specific	262.94	153.44	153.44	6.69	175	>sp|P01266|THYG_HUMAN Thyroglobulin OS=Homo sapiens OX=9606 GN=TG PE=1 SV=5	17152	20210911_zy_tissue_ethcd_1.14931.14931.3	controllerType=0 controllerNumber=1 scan=14931	67.2635
13636:3	1	R.ETEEIVSASN[+2059.735]SSRFPLGESFLVAK.G	HexNAc(4)Hex(5)Fuc(1)NeuAc(1)	N[+2060]	1553.02	3	4657.04	4657.04	0	-1	938	Specific	413.69	260.07	260.07	6.85	175	>sp|P01266|THYG_HUMAN Thyroglobulin OS=Homo sapiens OX=9606 GN=TG PE=1 SV=5	17152	20210911_zy_tissue_ethcd_1.14979.14979.3	controllerType=0 controllerNumber=1 scan=14979	67.4774
03446:3	1	R.ERLGVN[+1216.423]VTWK.S	HexNAc(2)Hex(5)	N[+1216]	806.701	3	2418.09	2418.09	0	-1.6	1360	Specific	232.66	147.18	147.18	5.14	175	>sp|P01266|THYG_HUMAN Thyroglobulin OS=Homo sapiens OX=9606 GN=TG PE=1 SV=5	17152	20210911_zy_tissue_ethcd_1.3799.3799.3	controllerType=0 controllerNumber=1 scan=3799	17.3295
03524:3	1	R.ERLGVN[+1872.651]VTWK.S	HexNAc(3)Hex(6)NeuAc(1)	N[+1873]	1025.44	3	3074.31	3074.32	0	-1.4	1360	Specific	246.23	110.2	110.2	5.59	175	>sp|P01266|THYG_HUMAN Thyroglobulin OS=Homo sapiens OX=9606 GN=TG PE=1 SV=5	17152	20210911_zy_tissue_ethcd_1.3885.3885.3	controllerType=0 controllerNumber=1 scan=3885	17.7086
03459:3	1	R.ERLGVN[+1419.502]VTWK.S	HexNAc(3)Hex(5)	N[+1420]	874.394	3	2621.17	2621.17	0	-1.1	1360	Specific	252.95	116.9	116.9	5.51	175	>sp|P01266|THYG_HUMAN Thyroglobulin OS=Homo sapiens OX=9606 GN=TG PE=1 SV=5	17152	20210911_zy_tissue_ethcd_1.3814.3814.3	controllerType=0 controllerNumber=1 scan=3814	17.3927
03397:3	1	R.ERLGVN[+1946.687]VTWK.S	HexNAc(4)Hex(7)	N[+1947]	1050.12	3	3148.35	3148.36	0	-1	1360	Specific	265.91	128.39	128.39	5.11	175	>sp|P01266|THYG_HUMAN Thyroglobulin OS=Homo sapiens OX=9606 GN=TG PE=1 SV=5	17152	20210911_zy_tissue_ethcd_1.3746.3746.3	controllerType=0 controllerNumber=1 scan=3746	17.0813
03388:3	1	R.ERLGVN[+1581.555]VTWK.S	HexNAc(3)Hex(6)	N[+1582]	928.412	3	2783.22	2783.22	0	-1.3	1360	Specific	281.02	129.25	129.25	5.11	175	>sp|P01266|THYG_HUMAN Thyroglobulin OS=Homo sapiens OX=9606 GN=TG PE=1 SV=5	17152	20210911_zy_tissue_ethcd_1.3736.3736.3	controllerType=0 controllerNumber=1 scan=3736	17.0337
03398:3	1	R.ERLGVN[+1784.634]VTWK.S	HexNAc(4)Hex(6)	N[+1785]	996.105	3	2986.3	2986.3	0	-1.3	1360	Specific	285.11	129.85	129.85	5.63	175	>sp|P01266|THYG_HUMAN Thyroglobulin OS=Homo sapiens OX=9606 GN=TG PE=1 SV=5	17152	20210911_zy_tissue_ethcd_1.3747.3747.3	controllerType=0 controllerNumber=1 scan=3747	17.0863
07156:3	1	R.ERLGVN[+2204.772]VTWK.S	HexNAc(4)Hex(5)NeuAc(2)	N[+2205]	1136.15	3	3406.44	3406.44	0	-1.3	1360	Specific	286.97	125.38	125.38	5.1	175	>sp|P01266|THYG_HUMAN Thyroglobulin OS=Homo sapiens OX=9606 GN=TG PE=1 SV=5	17152	20210911_zy_tissue_ethcd_1.7871.7871.3	controllerType=0 controllerNumber=1 scan=7871	35.5504
04904:3	1	R.ERLGVN[+1872.651]VTWK.S	HexNAc(3)Hex(6)NeuAc(1)	N[+1873]	1025.44	3	3074.31	3074.32	0	-1.7	1360	Specific	304.69	154.88	154.88	5.69	175	>sp|P01266|THYG_HUMAN Thyroglobulin OS=Homo sapiens OX=9606 GN=TG PE=1 SV=5	17152	20210911_zy_tissue_ethcd_1.5398.5398.3	controllerType=0 controllerNumber=1 scan=5398	24.5291
04966:3	1	R.ERLGVN[+1872.651]VTWK.S	HexNAc(3)Hex(6)NeuAc(1)	N[+1873]	1025.44	3	3074.32	3074.32	0	-0.8	1360	Specific	318.94	164.64	164.64	5.61	175	>sp|P01266|THYG_HUMAN Thyroglobulin OS=Homo sapiens OX=9606 GN=TG PE=1 SV=5	17152	20210911_zy_tissue_ethcd_1.5466.5466.3	controllerType=0 controllerNumber=1 scan=5466	24.8318
06716:3	1	R.LGVN[+2237.783]VTWK.S	HexNAc(4)Hex(7)NeuAc(1)	N[+2238]	1052.11	3	3154.3	3154.31	0	-2	1362	Specific	209.55	59.85	59.85	3.14	175	>sp|P01266|THYG_HUMAN Thyroglobulin OS=Homo sapiens OX=9606 GN=TG PE=1 SV=5	17152	20210911_zy_tissue_ethcd_1.7388.7388.3	controllerType=0 controllerNumber=1 scan=7388	33.3693
06866:2	1	R.LGVN[+1710.598]VTWK.S	HexNAc(3)Hex(5)NeuAc(1)	N[+1711]	1314.06	2	2627.12	2627.12	0	-0.5	1362	Specific	209.84	51.34	51.34	3.09	175	>sp|P01266|THYG_HUMAN Thyroglobulin OS=Homo sapiens OX=9606 GN=TG PE=1 SV=5	17152	20210911_zy_tissue_ethcd_1.7553.7553.2	controllerType=0 controllerNumber=1 scan=7553	34.1159
06783:3	1	R.LGVN[+1710.598]VTWK.S	HexNAc(3)Hex(5)NeuAc(1)	N[+1711]	876.382	3	2627.13	2627.12	0	3.4	1362	Specific	211.47	93.04	93.04	2.21	175	>sp|P01266|THYG_HUMAN Thyroglobulin OS=Homo sapiens OX=9606 GN=TG PE=1 SV=5	17152	20210911_zy_tissue_ethcd_1.7461.7461.3	controllerType=0 controllerNumber=1 scan=7461	33.7073
06778:2	1	R.LGVN[+1872.651]VTWK.S	HexNAc(3)Hex(6)NeuAc(1)	N[+1873]	1395.09	2	2789.17	2789.18	0	-1.7	1362	Specific	224.61	68.07	68.07	5.31	175	>sp|P01266|THYG_HUMAN Thyroglobulin OS=Homo sapiens OX=9606 GN=TG PE=1 SV=5	17152	20210911_zy_tissue_ethcd_1.7456.7456.2	controllerType=0 controllerNumber=1 scan=7456	33.6855
06757:2	1	R.LGVN[+1216.423]VTWK.S	HexNAc(2)Hex(5)	N[+1216]	1066.98	2	2132.94	2132.95	0	-2.1	1362	Specific	230.2	138.15	138.15	5.71	175	>sp|P01266|THYG_HUMAN Thyroglobulin OS=Homo sapiens OX=9606 GN=TG PE=1 SV=5	17152	20210911_zy_tissue_ethcd_1.7433.7433.2	controllerType=0 controllerNumber=1 scan=7433	33.5784
06750:2	1	R.LGVN[+1257.449]VTWK.S	HexNAc(3)Hex(4)	N[+1257]	1087.49	2	2173.98	2173.97	0	0.3	1362	Specific	232.49	150.69	150.69	5.08	175	>sp|P01266|THYG_HUMAN Thyroglobulin OS=Homo sapiens OX=9606 GN=TG PE=1 SV=5	17152	20210911_zy_tissue_ethcd_1.7425.7425.2	controllerType=0 controllerNumber=1 scan=7425	33.5427
06731:2	1	R.LGVN[+1913.677]VTWK.S	HexNAc(4)Hex(5)NeuAc(1)	N[+1914]	1415.6	2	2830.2	2830.2	0	0.1	1362	Specific	238.17	44.16	44.16	4.5	175	>sp|P01266|THYG_HUMAN Thyroglobulin OS=Homo sapiens OX=9606 GN=TG PE=1 SV=5	17152	20210911_zy_tissue_ethcd_1.7404.7404.2	controllerType=0 controllerNumber=1 scan=7404	33.442
04590:2	1	R.LGVN[+1581.555]VTWK.S	HexNAc(3)Hex(6)	N[+1582]	1249.54	2	2498.08	2498.08	0	-1	1362	Specific	240.12	150.58	150.58	5.62	175	>sp|P01266|THYG_HUMAN Thyroglobulin OS=Homo sapiens OX=9606 GN=TG PE=1 SV=5	17152	20210911_zy_tissue_ethcd_1.5054.5054.2	controllerType=0 controllerNumber=1 scan=5054	22.9906
06893:2	1	R.LGVN[+1054.370]VTWK.S	HexNAc(2)Hex(4)	N[+1054]	985.948	2	1970.89	1970.9	0	-2.8	1362	Specific	244.79	130.61	130.61	4.83	175	>sp|P01266|THYG_HUMAN Thyroglobulin OS=Homo sapiens OX=9606 GN=TG PE=1 SV=5	17152	20210911_zy_tissue_ethcd_1.7582.7582.2	controllerType=0 controllerNumber=1 scan=7582	34.2511
06767:2	1	R.LGVN[+1872.651]VTWK.S	HexNAc(3)Hex(6)NeuAc(1)	N[+1873]	1395.09	2	2789.17	2789.18	0	-1.3	1362	Specific	248.43	49.27	49.27	5.05	175	>sp|P01266|THYG_HUMAN Thyroglobulin OS=Homo sapiens OX=9606 GN=TG PE=1 SV=5	17152	20210911_zy_tissue_ethcd_1.7444.7444.3	controllerType=0 controllerNumber=1 scan=7444	33.6302
06804:3	1	R.LGVN[+1872.651]VTWK.S	HexNAc(3)Hex(6)NeuAc(1)	N[+1873]	930.395	3	2789.17	2789.18	0	-2	1362	Specific	252.02	88.27	88.27	5.34	175	>sp|P01266|THYG_HUMAN Thyroglobulin OS=Homo sapiens OX=9606 GN=TG PE=1 SV=5	17152	20210911_zy_tissue_ethcd_1.7485.7485.3	controllerType=0 controllerNumber=1 scan=7485	33.8109
06798:2	1	R.LGVN[+1872.651]VTWK.S	HexNAc(3)Hex(6)NeuAc(1)	N[+1873]	1395.09	2	2789.17	2789.18	0	-2.6	1362	Specific	266.9	57.47	57.47	5.14	175	>sp|P01266|THYG_HUMAN Thyroglobulin OS=Homo sapiens OX=9606 GN=TG PE=1 SV=5	17152	20210911_zy_tissue_ethcd_1.7478.7478.3	controllerType=0 controllerNumber=1 scan=7478	33.7814
06747:2	1	R.LGVN[+1872.651]VTWK.S	HexNAc(3)Hex(6)NeuAc(1)	N[+1873]	1395.09	2	2789.17	2789.18	0	-0.5	1362	Specific	296.07	128.05	128.05	5.5	175	>sp|P01266|THYG_HUMAN Thyroglobulin OS=Homo sapiens OX=9606 GN=TG PE=1 SV=5	17152	20210911_zy_tissue_ethcd_1.7422.7422.2	controllerType=0 controllerNumber=1 scan=7422	33.5265
06772:2	1	R.LGVN[+1054.370]VTWK.S	HexNAc(2)Hex(4)	N[+1054]	985.95	2	1970.89	1970.9	0	-1.6	1362	Specific	377.87	213.24	213.24	5.32	175	>sp|P01266|THYG_HUMAN Thyroglobulin OS=Homo sapiens OX=9606 GN=TG PE=1 SV=5	17152	20210911_zy_tissue_ethcd_1.7449.7449.2	controllerType=0 controllerNumber=1 scan=7449	33.6515
04138:3	1	R.LGVN[+1710.598]VTWKSR.L	HexNAc(3)Hex(5)NeuAc(1)	N[+1711]	957.421	3	2870.25	2870.26	0	-2.5	1362	Specific	224.58	54.29	54.29	4.53	175	>sp|P01266|THYG_HUMAN Thyroglobulin OS=Homo sapiens OX=9606 GN=TG PE=1 SV=5	17152	20210911_zy_tissue_ethcd_1.4559.4559.3	controllerType=0 controllerNumber=1 scan=4559	20.7655
04066:3	1	R.LGVN[+1872.651]VTWKSR.L	HexNAc(3)Hex(6)NeuAc(1)	N[+1873]	1011.44	3	3032.3	3032.31	0	-1.6	1362	Specific	365.78	151.36	151.36	5.83	175	>sp|P01266|THYG_HUMAN Thyroglobulin OS=Homo sapiens OX=9606 GN=TG PE=1 SV=5	17152	20210911_zy_tissue_ethcd_1.4480.4480.3	controllerType=0 controllerNumber=1 scan=4480	20.4096
06297:3	1	R.HFDVAHVSTAATSN[+1864.634]FSAVR.D	HexNAc(2)Hex(9)	N[+1865]	1294.54	3	3881.61	3881.62	0	-3.5	2109	Specific	201.22	183.49	183.49	5.88	175	>sp|P01266|THYG_HUMAN Thyroglobulin OS=Homo sapiens OX=9606 GN=TG PE=1 SV=5	17152	20210911_zy_tissue_ethcd_1.6927.6927.3	controllerType=0 controllerNumber=1 scan=6927	31.2795
05949:3	1	R.HFDVAHVSTAATSN[+1702.581]FSAVR.D	HexNAc(2)Hex(8)	N[+1703]	1240.53	3	3719.56	3719.57	0	-2.2	2109	Specific	205.51	103.42	103.42	6.16	175	>sp|P01266|THYG_HUMAN Thyroglobulin OS=Homo sapiens OX=9606 GN=TG PE=1 SV=5	17152	20210911_zy_tissue_ethcd_1.6545.6545.3	controllerType=0 controllerNumber=1 scan=6545	29.5375
05896:4	1	R.HFDVAHVSTAATSN[+1216.423]FSAVR.D	HexNAc(2)Hex(5)	N[+1216]	809.108	4	3233.41	3233.41	0	0	2109	Specific	212.4	165.91	165.91	4.86	175	>sp|P01266|THYG_HUMAN Thyroglobulin OS=Homo sapiens OX=9606 GN=TG PE=1 SV=5	17152	20210911_zy_tissue_ethcd_1.6487.6487.4	controllerType=0 controllerNumber=1 scan=6487	29.2735
06694:3	1	R.HFDVAHVSTAATSN[+1540.529]FSAVR.D	HexNAc(2)Hex(7)	N[+1541]	1186.51	3	3557.51	3557.52	0	-3.2	2109	Specific	212.84	100.44	100.44	5.99	175	>sp|P01266|THYG_HUMAN Thyroglobulin OS=Homo sapiens OX=9606 GN=TG PE=1 SV=5	17152	20210911_zy_tissue_ethcd_1.7363.7363.3	controllerType=0 controllerNumber=1 scan=7363	33.2571
06358:3	1	R.HFDVAHVSTAATSN[+1864.634]FSAVR.D	HexNAc(2)Hex(9)	N[+1865]	1294.55	3	3881.64	3881.62	0	4.7	2109	Specific	217.7	187.31	187.31	4.93	175	>sp|P01266|THYG_HUMAN Thyroglobulin OS=Homo sapiens OX=9606 GN=TG PE=1 SV=5	17152	20210911_zy_tissue_ethcd_1.6994.6994.3	controllerType=0 controllerNumber=1 scan=6994	31.5825
06468:3	1	R.HFDVAHVSTAATSN[+1540.529]FSAVR.D	HexNAc(2)Hex(7)	N[+1541]	1186.51	3	3557.53	3557.52	0	2.7	2109	Specific	227.08	190.59	190.59	6.63	175	>sp|P01266|THYG_HUMAN Thyroglobulin OS=Homo sapiens OX=9606 GN=TG PE=1 SV=5	17152	20210911_zy_tissue_ethcd_1.7115.7115.3	controllerType=0 controllerNumber=1 scan=7115	32.1247
06243:3	1	R.HFDVAHVSTAATSN[+1054.370]FSAVR.D	HexNAc(2)Hex(4)	N[+1054]	1024.46	3	3071.35	3071.36	0	-2	2109	Specific	227.37	177.01	177.01	7.71	175	>sp|P01266|THYG_HUMAN Thyroglobulin OS=Homo sapiens OX=9606 GN=TG PE=1 SV=5	17152	20210911_zy_tissue_ethcd_1.6868.6868.3	controllerType=0 controllerNumber=1 scan=6868	31.0145
06455:3	1	R.HFDVAHVSTAATSN[+1540.529]FSAVR.D	HexNAc(2)Hex(7)	N[+1541]	1186.51	3	3557.52	3557.52	0	0.1	2109	Specific	229.91	161.84	161.84	7.16	175	>sp|P01266|THYG_HUMAN Thyroglobulin OS=Homo sapiens OX=9606 GN=TG PE=1 SV=5	17152	20210911_zy_tissue_ethcd_1.7101.7101.3	controllerType=0 controllerNumber=1 scan=7101	32.062
05115:2	1	R.HFDVAHVSTAATSN[+1540.529]FSAVR.D	HexNAc(2)Hex(7)	N[+1541]	1779.26	2	3557.52	3557.52	0	0	2109	Specific	234.49	210.73	210.73	6.71	175	>sp|P01266|THYG_HUMAN Thyroglobulin OS=Homo sapiens OX=9606 GN=TG PE=1 SV=5	17152	20210911_zy_tissue_ethcd_1.5632.5632.2	controllerType=0 controllerNumber=1 scan=5632	25.4919
06447:3	1	R.HFDVAHVSTAATSN[+1540.529]FSAVR.D	HexNAc(2)Hex(7)	N[+1541]	1186.51	3	3557.52	3557.52	0	1.6	2109	Specific	239.93	148.01	148.01	6.9	175	>sp|P01266|THYG_HUMAN Thyroglobulin OS=Homo sapiens OX=9606 GN=TG PE=1 SV=5	17152	20210911_zy_tissue_ethcd_1.7092.7092.3	controllerType=0 controllerNumber=1 scan=7092	32.0213
03162:3	1	R.HFDVAHVSTAATSN[+1702.581]FSAVR.D	HexNAc(2)Hex(8)	N[+1703]	1240.53	3	3719.57	3719.57	0	-0.5	2109	Specific	240.8	181.8	181.8	7.4	175	>sp|P01266|THYG_HUMAN Thyroglobulin OS=Homo sapiens OX=9606 GN=TG PE=1 SV=5	17152	20210911_zy_tissue_ethcd_1.3488.3488.3	controllerType=0 controllerNumber=1 scan=3488	15.9105
04846:4	1	R.HFDVAHVSTAATSN[+1702.581]FSAVR.D	HexNAc(2)Hex(8)	N[+1703]	930.647	4	3719.56	3719.57	0	-1.5	2109	Specific	241.27	196.13	196.13	7.52	175	>sp|P01266|THYG_HUMAN Thyroglobulin OS=Homo sapiens OX=9606 GN=TG PE=1 SV=5	17152	20210911_zy_tissue_ethcd_1.5334.5334.4	controllerType=0 controllerNumber=1 scan=5334	24.2473
05960:3	1	R.HFDVAHVSTAATSN[+1378.476]FSAVR.D	HexNAc(2)Hex(6)	N[+1378]	1132.49	3	3395.46	3395.46	0	-2.4	2109	Specific	243.13	199.37	199.37	7.83	175	>sp|P01266|THYG_HUMAN Thyroglobulin OS=Homo sapiens OX=9606 GN=TG PE=1 SV=5	17152	20210911_zy_tissue_ethcd_1.6557.6557.3	controllerType=0 controllerNumber=1 scan=6557	29.5918
03672:3	1	R.HFDVAHVSTAATSN[+1702.581]FSAVR.D	HexNAc(2)Hex(8)	N[+1703]	1240.53	3	3719.57	3719.57	0	0.3	2109	Specific	245.49	184.86	184.86	7.1	175	>sp|P01266|THYG_HUMAN Thyroglobulin OS=Homo sapiens OX=9606 GN=TG PE=1 SV=5	17152	20210911_zy_tissue_ethcd_1.4047.4047.3	controllerType=0 controllerNumber=1 scan=4047	18.4329
06857:3	1	R.HFDVAHVSTAATSN[+1540.529]FSAVR.D	HexNAc(2)Hex(7)	N[+1541]	1186.51	3	3557.52	3557.52	0	0	2109	Specific	249.17	179.96	179.96	7.1	175	>sp|P01266|THYG_HUMAN Thyroglobulin OS=Homo sapiens OX=9606 GN=TG PE=1 SV=5	17152	20210911_zy_tissue_ethcd_1.7543.7543.3	controllerType=0 controllerNumber=1 scan=7543	34.0704
07001:3	1	R.HFDVAHVSTAATSN[+1540.529]FSAVR.D	HexNAc(2)Hex(7)	N[+1541]	1186.51	3	3557.51	3557.52	0	-2.4	2109	Specific	261.91	142.98	142.98	7.81	175	>sp|P01266|THYG_HUMAN Thyroglobulin OS=Homo sapiens OX=9606 GN=TG PE=1 SV=5	17152	20210911_zy_tissue_ethcd_1.7701.7701.3	controllerType=0 controllerNumber=1 scan=7701	34.7932
05931:3	1	R.HFDVAHVSTAATSN[+1378.476]FSAVR.D	HexNAc(2)Hex(6)	N[+1378]	1132.49	3	3395.46	3395.46	0	-1.3	2109	Specific	263.3	199.24	199.24	7.78	175	>sp|P01266|THYG_HUMAN Thyroglobulin OS=Homo sapiens OX=9606 GN=TG PE=1 SV=5	17152	20210911_zy_tissue_ethcd_1.6525.6525.3	controllerType=0 controllerNumber=1 scan=6525	29.446
06309:3	1	R.HFDVAHVSTAATSN[+1540.529]FSAVR.D	HexNAc(2)Hex(7)	N[+1541]	1186.51	3	3557.52	3557.52	0	-0.1	2109	Specific	263.76	158.91	158.91	7.21	175	>sp|P01266|THYG_HUMAN Thyroglobulin OS=Homo sapiens OX=9606 GN=TG PE=1 SV=5	17152	20210911_zy_tissue_ethcd_1.6941.6941.3	controllerType=0 controllerNumber=1 scan=6941	31.3406
05989:3	1	R.HFDVAHVSTAATSN[+1216.423]FSAVR.D	HexNAc(2)Hex(5)	N[+1216]	1078.47	3	3233.4	3233.41	0	-3	2109	Specific	265.33	210.27	210.27	7.69	175	>sp|P01266|THYG_HUMAN Thyroglobulin OS=Homo sapiens OX=9606 GN=TG PE=1 SV=5	17152	20210911_zy_tissue_ethcd_1.6589.6589.3	controllerType=0 controllerNumber=1 scan=6589	29.7386
06918:3	1	R.HFDVAHVSTAATSN[+1540.529]FSAVR.D	HexNAc(2)Hex(7)	N[+1541]	1186.51	3	3557.51	3557.52	0	-0.9	2109	Specific	266.56	197.58	197.58	7.78	175	>sp|P01266|THYG_HUMAN Thyroglobulin OS=Homo sapiens OX=9606 GN=TG PE=1 SV=5	17152	20210911_zy_tissue_ethcd_1.7610.7610.3	controllerType=0 controllerNumber=1 scan=7610	34.3812
05642:4	1	R.HFDVAHVSTAATSN[+1864.634]FSAVR.D	HexNAc(2)Hex(9)	N[+1865]	971.158	4	3881.61	3881.62	0	-3.2	2109	Specific	271.06	229.04	229.04	7.24	175	>sp|P01266|THYG_HUMAN Thyroglobulin OS=Homo sapiens OX=9606 GN=TG PE=1 SV=5	17152	20210911_zy_tissue_ethcd_1.6208.6208.4	controllerType=0 controllerNumber=1 scan=6208	28.0042
05279:2	1	R.HFDVAHVSTAATSN[+203.079]FSAVR.D	HexNAc(1)	N[+203]	1110.54	2	2220.07	2220.07	0	1.5	2109	Specific	279.16	279.16	279.16	5.98	175	>sp|P01266|THYG_HUMAN Thyroglobulin OS=Homo sapiens OX=9606 GN=TG PE=1 SV=5	17152	20210911_zy_tissue_ethcd_1.5811.5811.2	controllerType=0 controllerNumber=1 scan=5811	26.2419
06106:3	1	R.HFDVAHVSTAATSN[+1702.581]FSAVR.D	HexNAc(2)Hex(8)	N[+1703]	1240.53	3	3719.56	3719.57	0	-1.4	2109	Specific	281.69	113.27	113.27	7.32	175	>sp|P01266|THYG_HUMAN Thyroglobulin OS=Homo sapiens OX=9606 GN=TG PE=1 SV=5	17152	20210911_zy_tissue_ethcd_1.6718.6718.4	controllerType=0 controllerNumber=1 scan=6718	30.3299
05660:3	1	R.HFDVAHVSTAATSN[+1378.476]FSAVR.D	HexNAc(2)Hex(6)	N[+1378]	1132.49	3	3395.45	3395.46	0	-3.6	2109	Specific	283.86	214.46	214.46	7.39	175	>sp|P01266|THYG_HUMAN Thyroglobulin OS=Homo sapiens OX=9606 GN=TG PE=1 SV=5	17152	20210911_zy_tissue_ethcd_1.6228.6228.3	controllerType=0 controllerNumber=1 scan=6228	28.0914
06608:3	1	R.HFDVAHVSTAATSN[+1540.529]FSAVR.D	HexNAc(2)Hex(7)	N[+1541]	1186.51	3	3557.51	3557.52	0	-2.3	2109	Specific	284.67	188.07	188.07	7.78	175	>sp|P01266|THYG_HUMAN Thyroglobulin OS=Homo sapiens OX=9606 GN=TG PE=1 SV=5	17152	20210911_zy_tissue_ethcd_1.7269.7269.3	controllerType=0 controllerNumber=1 scan=7269	32.8262
06025:3	1	R.HFDVAHVSTAATSN[+2026.687]FSAVR.D	HexNAc(2)Hex(10)	N[+2027]	1348.56	3	4043.66	4043.68	0	-3.8	2109	Specific	288.48	133.2	133.2	7.57	175	>sp|P01266|THYG_HUMAN Thyroglobulin OS=Homo sapiens OX=9606 GN=TG PE=1 SV=5	17152	20210911_zy_tissue_ethcd_1.6629.6629.3	controllerType=0 controllerNumber=1 scan=6629	29.9221
06211:3	1	R.HFDVAHVSTAATSN[+1702.581]FSAVR.D	HexNAc(2)Hex(8)	N[+1703]	1240.52	3	3719.56	3719.57	0	-3.3	2109	Specific	288.57	160.75	160.75	7.55	175	>sp|P01266|THYG_HUMAN Thyroglobulin OS=Homo sapiens OX=9606 GN=TG PE=1 SV=5	17152	20210911_zy_tissue_ethcd_1.6833.6833.3	controllerType=0 controllerNumber=1 scan=6833	30.8566
06169:3	1	R.HFDVAHVSTAATSN[+1864.634]FSAVR.D	HexNAc(2)Hex(9)	N[+1865]	1294.54	3	3881.62	3881.62	0	-0.7	2109	Specific	296.63	189.75	189.75	7.49	175	>sp|P01266|THYG_HUMAN Thyroglobulin OS=Homo sapiens OX=9606 GN=TG PE=1 SV=5	17152	20210911_zy_tissue_ethcd_1.6787.6787.3	controllerType=0 controllerNumber=1 scan=6787	30.6433
06028:3	1	R.HFDVAHVSTAATSN[+1378.476]FSAVR.D	HexNAc(2)Hex(6)	N[+1378]	1132.49	3	3395.45	3395.46	0	-2.9	2109	Specific	299.57	247.7	247.7	7.69	175	>sp|P01266|THYG_HUMAN Thyroglobulin OS=Homo sapiens OX=9606 GN=TG PE=1 SV=5	17152	20210911_zy_tissue_ethcd_1.6632.6632.3	controllerType=0 controllerNumber=1 scan=6632	29.9359
06178:3	1	R.HFDVAHVSTAATSN[+1702.581]FSAVR.D	HexNAc(2)Hex(8)	N[+1703]	1240.53	3	3719.56	3719.57	0	-2	2109	Specific	299.64	201.6	201.6	7.89	175	>sp|P01266|THYG_HUMAN Thyroglobulin OS=Homo sapiens OX=9606 GN=TG PE=1 SV=5	17152	20210911_zy_tissue_ethcd_1.6797.6797.3	controllerType=0 controllerNumber=1 scan=6797	30.6891
05717:3	1	R.HFDVAHVSTAATSN[+1216.423]FSAVR.D	HexNAc(2)Hex(5)	N[+1216]	1078.47	3	3233.41	3233.41	0	-0.7	2109	Specific	301.82	255.69	255.69	7.63	175	>sp|P01266|THYG_HUMAN Thyroglobulin OS=Homo sapiens OX=9606 GN=TG PE=1 SV=5	17152	20210911_zy_tissue_ethcd_1.6290.6290.3	controllerType=0 controllerNumber=1 scan=6290	28.3686
05985:3	1	R.HFDVAHVSTAATSN[+1702.581]FSAVR.D	HexNAc(2)Hex(8)	N[+1703]	1240.53	3	3719.56	3719.57	0	-1.7	2109	Specific	303.76	179.69	179.69	7.8	175	>sp|P01266|THYG_HUMAN Thyroglobulin OS=Homo sapiens OX=9606 GN=TG PE=1 SV=5	17152	20210911_zy_tissue_ethcd_1.6585.6585.3	controllerType=0 controllerNumber=1 scan=6585	29.7203
05000:3	1	R.HFDVAHVSTAATSN[+1864.634]FSAVR.D	HexNAc(2)Hex(9)	N[+1865]	1294.54	3	3881.62	3881.62	0	-1.2	2109	Specific	307.26	279.14	279.14	7.83	175	>sp|P01266|THYG_HUMAN Thyroglobulin OS=Homo sapiens OX=9606 GN=TG PE=1 SV=5	17152	20210911_zy_tissue_ethcd_1.5503.5503.2	controllerType=0 controllerNumber=1 scan=5503	24.9877
05066:3	1	R.HFDVAHVSTAATSN[+1702.581]FSAVR.D	HexNAc(2)Hex(8)	N[+1703]	1240.53	3	3719.57	3719.57	0	-1	2109	Specific	308.19	277.64	277.64	7.83	175	>sp|P01266|THYG_HUMAN Thyroglobulin OS=Homo sapiens OX=9606 GN=TG PE=1 SV=5	17152	20210911_zy_tissue_ethcd_1.5577.5577.2	controllerType=0 controllerNumber=1 scan=5577	25.2726
05921:3	1	R.HFDVAHVSTAATSN[+1216.423]FSAVR.D	HexNAc(2)Hex(5)	N[+1216]	1078.47	3	3233.4	3233.41	0	-4.3	2109	Specific	308.78	215.65	215.65	7.45	175	>sp|P01266|THYG_HUMAN Thyroglobulin OS=Homo sapiens OX=9606 GN=TG PE=1 SV=5	17152	20210911_zy_tissue_ethcd_1.6514.6514.3	controllerType=0 controllerNumber=1 scan=6514	29.3966
04498:3	1	R.HFDVAHVSTAATSN[+1378.476]FSAVR.D	HexNAc(2)Hex(6)	N[+1378]	1132.49	3	3395.46	3395.46	0	-1.5	2109	Specific	321.06	261.58	261.58	7.94	175	>sp|P01266|THYG_HUMAN Thyroglobulin OS=Homo sapiens OX=9606 GN=TG PE=1 SV=5	17152	20210911_zy_tissue_ethcd_1.4953.4953.2	controllerType=0 controllerNumber=1 scan=4953	22.5407
05281:3	1	R.HFDVAHVSTAATSN[+1378.476]FSAVR.D	HexNAc(2)Hex(6)	N[+1378]	1132.49	3	3395.46	3395.46	0	-2.1	2109	Specific	323.53	276.62	276.62	7.9	175	>sp|P01266|THYG_HUMAN Thyroglobulin OS=Homo sapiens OX=9606 GN=TG PE=1 SV=5	17152	20210911_zy_tissue_ethcd_1.5813.5813.3	controllerType=0 controllerNumber=1 scan=5813	26.2531
05772:3	1	R.HFDVAHVSTAATSN[+1864.634]FSAVR.D	HexNAc(2)Hex(9)	N[+1865]	1294.54	3	3881.61	3881.62	0	-2.7	2109	Specific	323.84	206.6	206.6	7.73	175	>sp|P01266|THYG_HUMAN Thyroglobulin OS=Homo sapiens OX=9606 GN=TG PE=1 SV=5	17152	20210911_zy_tissue_ethcd_1.6351.6351.3	controllerType=0 controllerNumber=1 scan=6351	28.6468
05872:3	1	R.HFDVAHVSTAATSN[+1864.634]FSAVR.D	HexNAc(2)Hex(9)	N[+1865]	1294.55	3	3881.62	3881.62	0	-0.5	2109	Specific	324.51	211.03	211.03	7.45	175	>sp|P01266|THYG_HUMAN Thyroglobulin OS=Homo sapiens OX=9606 GN=TG PE=1 SV=5	17152	20210911_zy_tissue_ethcd_1.6461.6461.3	controllerType=0 controllerNumber=1 scan=6461	29.1511
05102:3	1	R.HFDVAHVSTAATSN[+1540.529]FSAVR.D	HexNAc(2)Hex(7)	N[+1541]	1186.51	3	3557.51	3557.52	0	-1.9	2109	Specific	327.59	278.3	278.3	7.99	175	>sp|P01266|THYG_HUMAN Thyroglobulin OS=Homo sapiens OX=9606 GN=TG PE=1 SV=5	17152	20210911_zy_tissue_ethcd_1.5618.5618.2	controllerType=0 controllerNumber=1 scan=5618	25.434
05892:3	1	R.HFDVAHVSTAATSN[+1378.476]FSAVR.D	HexNAc(2)Hex(6)	N[+1378]	1132.49	3	3395.46	3395.46	0	-2.7	2109	Specific	329.19	255.47	255.47	7.84	175	>sp|P01266|THYG_HUMAN Thyroglobulin OS=Homo sapiens OX=9606 GN=TG PE=1 SV=5	17152	20210911_zy_tissue_ethcd_1.6483.6483.3	controllerType=0 controllerNumber=1 scan=6483	29.2541
04683:3	1	R.HFDVAHVSTAATSN[+1216.423]FSAVR.D	HexNAc(2)Hex(5)	N[+1216]	1078.47	3	3233.41	3233.41	0	-1.4	2109	Specific	334.7	278.68	278.68	7.99	175	>sp|P01266|THYG_HUMAN Thyroglobulin OS=Homo sapiens OX=9606 GN=TG PE=1 SV=5	17152	20210911_zy_tissue_ethcd_1.5156.5156.3	controllerType=0 controllerNumber=1 scan=5156	23.4572
05600:4	1	R.HFDVAHVSTAATSN[+1216.423]FSAVR.D	HexNAc(2)Hex(5)	N[+1216]	809.107	4	3233.4	3233.41	0	-2.1	2109	Specific	336.78	241.25	241.25	7.28	175	>sp|P01266|THYG_HUMAN Thyroglobulin OS=Homo sapiens OX=9606 GN=TG PE=1 SV=5	17152	20210911_zy_tissue_ethcd_1.6162.6162.4	controllerType=0 controllerNumber=1 scan=6162	27.7988
03701:4	1	R.HFDVAHVSTAATSN[+1540.529]FSAVR.D	HexNAc(2)Hex(7)	N[+1541]	890.134	4	3557.51	3557.52	0	-1.2	2109	Specific	338.7	307.2	307.2	7.66	175	>sp|P01266|THYG_HUMAN Thyroglobulin OS=Homo sapiens OX=9606 GN=TG PE=1 SV=5	17152	20210911_zy_tissue_ethcd_1.4079.4079.4	controllerType=0 controllerNumber=1 scan=4079	18.575
05147:3	1	R.HFDVAHVSTAATSN[+1702.581]FSAVR.D	HexNAc(2)Hex(8)	N[+1703]	1240.53	3	3719.57	3719.57	0	-1.2	2109	Specific	338.94	291.84	291.84	7.91	175	>sp|P01266|THYG_HUMAN Thyroglobulin OS=Homo sapiens OX=9606 GN=TG PE=1 SV=5	17152	20210911_zy_tissue_ethcd_1.5667.5667.2	controllerType=0 controllerNumber=1 scan=5667	25.6398
05999:3	1	R.HFDVAHVSTAATSN[+1216.423]FSAVR.D	HexNAc(2)Hex(5)	N[+1216]	1078.47	3	3233.4	3233.41	0	-3.5	2109	Specific	351.87	275.42	275.42	7.73	175	>sp|P01266|THYG_HUMAN Thyroglobulin OS=Homo sapiens OX=9606 GN=TG PE=1 SV=5	17152	20210911_zy_tissue_ethcd_1.6600.6600.3	controllerType=0 controllerNumber=1 scan=6600	29.789
04787:3	1	R.HFDVAHVSTAATSN[+1864.634]FSAVR.D	HexNAc(2)Hex(9)	N[+1865]	1294.54	3	3881.62	3881.62	0	-1.3	2109	Specific	352.7	273.2	273.2	8	175	>sp|P01266|THYG_HUMAN Thyroglobulin OS=Homo sapiens OX=9606 GN=TG PE=1 SV=5	17152	20210911_zy_tissue_ethcd_1.5270.5270.3	controllerType=0 controllerNumber=1 scan=5270	23.9615
04553:3	1	R.HFDVAHVSTAATSN[+2026.687]FSAVR.D	HexNAc(2)Hex(10)	N[+2027]	1348.56	3	4043.67	4043.68	0	-1.8	2109	Specific	353.58	277.6	277.6	8.05	175	>sp|P01266|THYG_HUMAN Thyroglobulin OS=Homo sapiens OX=9606 GN=TG PE=1 SV=5	17152	20210911_zy_tissue_ethcd_1.5013.5013.3	controllerType=0 controllerNumber=1 scan=5013	22.8106
06007:3	1	R.HFDVAHVSTAATSN[+2026.687]FSAVR.D	HexNAc(2)Hex(10)	N[+2027]	1348.56	3	4043.67	4043.68	0	-0.6	2109	Specific	355.14	244.24	244.24	7.7	175	>sp|P01266|THYG_HUMAN Thyroglobulin OS=Homo sapiens OX=9606 GN=TG PE=1 SV=5	17152	20210911_zy_tissue_ethcd_1.6609.6609.3	controllerType=0 controllerNumber=1 scan=6609	29.8295
05883:3	1	R.HFDVAHVSTAATSN[+1702.581]FSAVR.D	HexNAc(2)Hex(8)	N[+1703]	1240.53	3	3719.56	3719.57	0	-2.5	2109	Specific	355.73	250	250	8	175	>sp|P01266|THYG_HUMAN Thyroglobulin OS=Homo sapiens OX=9606 GN=TG PE=1 SV=5	17152	20210911_zy_tissue_ethcd_1.6473.6473.3	controllerType=0 controllerNumber=1 scan=6473	29.2071
05834:3	1	R.HFDVAHVSTAATSN[+1702.581]FSAVR.D	HexNAc(2)Hex(8)	N[+1703]	1240.52	3	3719.56	3719.57	0	-3.7	2109	Specific	356.39	262.02	262.02	7.76	175	>sp|P01266|THYG_HUMAN Thyroglobulin OS=Homo sapiens OX=9606 GN=TG PE=1 SV=5	17152	20210911_zy_tissue_ethcd_1.6419.6419.3	controllerType=0 controllerNumber=1 scan=6419	28.953
06137:3	1	R.HFDVAHVSTAATSN[+1864.634]FSAVR.D	HexNAc(2)Hex(9)	N[+1865]	1294.55	3	3881.62	3881.62	0	-0.4	2109	Specific	361.86	245.83	245.83	7.7	175	>sp|P01266|THYG_HUMAN Thyroglobulin OS=Homo sapiens OX=9606 GN=TG PE=1 SV=5	17152	20210911_zy_tissue_ethcd_1.6752.6752.3	controllerType=0 controllerNumber=1 scan=6752	30.4866
05626:3	1	R.HFDVAHVSTAATSN[+1378.476]FSAVR.D	HexNAc(2)Hex(6)	N[+1378]	1132.49	3	3395.46	3395.46	0	-2.7	2109	Specific	364.84	287.35	287.35	7.87	175	>sp|P01266|THYG_HUMAN Thyroglobulin OS=Homo sapiens OX=9606 GN=TG PE=1 SV=5	17152	20210911_zy_tissue_ethcd_1.6191.6191.3	controllerType=0 controllerNumber=1 scan=6191	27.9279
05835:3	1	R.HFDVAHVSTAATSN[+1864.634]FSAVR.D	HexNAc(2)Hex(9)	N[+1865]	1294.54	3	3881.62	3881.62	0	-0.9	2109	Specific	367.62	253.02	253.02	8	175	>sp|P01266|THYG_HUMAN Thyroglobulin OS=Homo sapiens OX=9606 GN=TG PE=1 SV=5	17152	20210911_zy_tissue_ethcd_1.6420.6420.3	controllerType=0 controllerNumber=1 scan=6420	28.9576
06220:3	1	R.HFDVAHVSTAATSN[+1540.529]FSAVR.D	HexNAc(2)Hex(7)	N[+1541]	1186.51	3	3557.51	3557.52	0	-2	2109	Specific	369.24	256.2	256.2	8.02	175	>sp|P01266|THYG_HUMAN Thyroglobulin OS=Homo sapiens OX=9606 GN=TG PE=1 SV=5	17152	20210911_zy_tissue_ethcd_1.6843.6843.3	controllerType=0 controllerNumber=1 scan=6843	30.9012
05260:2	1	R.HFDVAHVSTAATSN[+1540.529]FSAVR.D	HexNAc(2)Hex(7)	N[+1541]	1779.26	2	3557.51	3557.52	0	-1	2109	Specific	370.73	268.89	268.89	7.45	175	>sp|P01266|THYG_HUMAN Thyroglobulin OS=Homo sapiens OX=9606 GN=TG PE=1 SV=5	17152	20210911_zy_tissue_ethcd_1.5790.5790.4	controllerType=0 controllerNumber=1 scan=5790	26.1565
06709:3	1	R.HFDVAHVSTAATSN[+2059.735]FSAVR.D	HexNAc(4)Hex(5)Fuc(1)NeuAc(1)	N[+2060]	1359.58	3	4076.72	4076.72	0	-1.9	2109	Specific	372.16	244.54	244.54	7.95	175	>sp|P01266|THYG_HUMAN Thyroglobulin OS=Homo sapiens OX=9606 GN=TG PE=1 SV=5	17152	20210911_zy_tissue_ethcd_1.7380.7380.3	controllerType=0 controllerNumber=1 scan=7380	33.3347
06078:3	1	R.HFDVAHVSTAATSN[+1216.423]FSAVR.D	HexNAc(2)Hex(5)	N[+1216]	1078.47	3	3233.41	3233.41	0	-0.7	2109	Specific	373.81	296.06	296.06	7.73	175	>sp|P01266|THYG_HUMAN Thyroglobulin OS=Homo sapiens OX=9606 GN=TG PE=1 SV=5	17152	20210911_zy_tissue_ethcd_1.6687.6687.3	controllerType=0 controllerNumber=1 scan=6687	30.1896
06036:3	1	R.HFDVAHVSTAATSN[+1540.529]FSAVR.D	HexNAc(2)Hex(7)	N[+1541]	1186.51	3	3557.51	3557.52	0	-1.8	2109	Specific	382.34	295.65	295.65	8.03	175	>sp|P01266|THYG_HUMAN Thyroglobulin OS=Homo sapiens OX=9606 GN=TG PE=1 SV=5	17152	20210911_zy_tissue_ethcd_1.6641.6641.3	controllerType=0 controllerNumber=1 scan=6641	29.9741
05134:3	1	R.HFDVAHVSTAATSN[+1702.581]FSAVR.D	HexNAc(2)Hex(8)	N[+1703]	1240.53	3	3719.57	3719.57	0	-0.9	2109	Specific	386.55	354.41	354.41	8.25	175	>sp|P01266|THYG_HUMAN Thyroglobulin OS=Homo sapiens OX=9606 GN=TG PE=1 SV=5	17152	20210911_zy_tissue_ethcd_1.5653.5653.2	controllerType=0 controllerNumber=1 scan=5653	25.579
06016:3	1	R.HFDVAHVSTAATSN[+2026.687]FSAVR.D	HexNAc(2)Hex(10)	N[+2027]	1348.56	3	4043.67	4043.68	0	-1.8	2109	Specific	387.13	243.09	243.09	7.95	175	>sp|P01266|THYG_HUMAN Thyroglobulin OS=Homo sapiens OX=9606 GN=TG PE=1 SV=5	17152	20210911_zy_tissue_ethcd_1.6619.6619.3	controllerType=0 controllerNumber=1 scan=6619	29.8763
05893:3	1	R.HFDVAHVSTAATSN[+1540.529]FSAVR.D	HexNAc(2)Hex(7)	N[+1541]	1186.51	3	3557.51	3557.52	0	-1.4	2109	Specific	387.25	292.56	292.56	7.99	175	>sp|P01266|THYG_HUMAN Thyroglobulin OS=Homo sapiens OX=9606 GN=TG PE=1 SV=5	17152	20210911_zy_tissue_ethcd_1.6484.6484.3	controllerType=0 controllerNumber=1 scan=6484	29.2587
04814:3	1	R.HFDVAHVSTAATSN[+1702.581]FSAVR.D	HexNAc(2)Hex(8)	N[+1703]	1240.53	3	3719.56	3719.57	0	-2.1	2109	Specific	390.75	301.52	301.52	8.06	175	>sp|P01266|THYG_HUMAN Thyroglobulin OS=Homo sapiens OX=9606 GN=TG PE=1 SV=5	17152	20210911_zy_tissue_ethcd_1.5299.5299.3	controllerType=0 controllerNumber=1 scan=5299	24.0913
04782:3	1	R.HFDVAHVSTAATSN[+1864.634]FSAVR.D	HexNAc(2)Hex(9)	N[+1865]	1294.55	3	3881.62	3881.62	0	-0.2	2109	Specific	407.11	316.75	316.75	7.92	175	>sp|P01266|THYG_HUMAN Thyroglobulin OS=Homo sapiens OX=9606 GN=TG PE=1 SV=5	17152	20210911_zy_tissue_ethcd_1.5264.5264.3	controllerType=0 controllerNumber=1 scan=5264	23.937
05534:3	1	R.HFDVAHVSTAATSN[+1054.370]FSAVR.D	HexNAc(2)Hex(4)	N[+1054]	1024.46	3	3071.35	3071.36	0	-2.1	2109	Specific	408.14	349.23	349.23	8.36	175	>sp|P01266|THYG_HUMAN Thyroglobulin OS=Homo sapiens OX=9606 GN=TG PE=1 SV=5	17152	20210911_zy_tissue_ethcd_1.6090.6090.3	controllerType=0 controllerNumber=1 scan=6090	27.473
04865:3	1	R.HFDVAHVSTAATSN[+1378.476]FSAVR.D	HexNAc(2)Hex(6)	N[+1378]	1132.49	3	3395.45	3395.46	0	-2.8	2109	Specific	432.57	366.03	366.03	8.32	175	>sp|P01266|THYG_HUMAN Thyroglobulin OS=Homo sapiens OX=9606 GN=TG PE=1 SV=5	17152	20210911_zy_tissue_ethcd_1.5355.5355.3	controllerType=0 controllerNumber=1 scan=5355	24.338
05478:3	1	R.HFDVAHVSTAATSN[+1864.634]FSAVR.D	HexNAc(2)Hex(9)	N[+1865]	1294.54	3	3881.62	3881.62	0	-1.8	2109	Specific	436.11	312.47	312.47	8.09	175	>sp|P01266|THYG_HUMAN Thyroglobulin OS=Homo sapiens OX=9606 GN=TG PE=1 SV=5	17152	20210911_zy_tissue_ethcd_1.6029.6029.3	controllerType=0 controllerNumber=1 scan=6029	27.2029
04779:3	1	R.HFDVAHVSTAATSN[+1378.476]FSAVR.D	HexNAc(2)Hex(6)	N[+1378]	1132.49	3	3395.46	3395.46	0	-2.3	2109	Specific	437.1	355.66	355.66	8.37	175	>sp|P01266|THYG_HUMAN Thyroglobulin OS=Homo sapiens OX=9606 GN=TG PE=1 SV=5	17152	20210911_zy_tissue_ethcd_1.5261.5261.3	controllerType=0 controllerNumber=1 scan=5261	23.9232
06101:3	1	R.HFDVAHVSTAATSN[+1216.423]FSAVR.D	HexNAc(2)Hex(5)	N[+1216]	1078.47	3	3233.39	3233.41	0	-5.3	2109	Specific	437.89	334.67	334.67	8.03	175	>sp|P01266|THYG_HUMAN Thyroglobulin OS=Homo sapiens OX=9606 GN=TG PE=1 SV=5	17152	20210911_zy_tissue_ethcd_1.6712.6712.3	controllerType=0 controllerNumber=1 scan=6712	30.3051
05522:3	1	R.HFDVAHVSTAATSN[+1054.370]FSAVR.D	HexNAc(2)Hex(4)	N[+1054]	1024.45	3	3071.35	3071.36	0	-3.3	2109	Specific	437.9	373.36	373.36	8.32	175	>sp|P01266|THYG_HUMAN Thyroglobulin OS=Homo sapiens OX=9606 GN=TG PE=1 SV=5	17152	20210911_zy_tissue_ethcd_1.6077.6077.3	controllerType=0 controllerNumber=1 scan=6077	27.4153
05741:3	1	R.HFDVAHVSTAATSN[+1378.476]FSAVR.D	HexNAc(2)Hex(6)	N[+1378]	1132.49	3	3395.46	3395.46	0	-1	2109	Specific	440.92	362.5	362.5	8.42	175	>sp|P01266|THYG_HUMAN Thyroglobulin OS=Homo sapiens OX=9606 GN=TG PE=1 SV=5	17152	20210911_zy_tissue_ethcd_1.6317.6317.3	controllerType=0 controllerNumber=1 scan=6317	28.4911
04534:3	1	R.HFDVAHVSTAATSN[+1864.634]FSAVR.D	HexNAc(2)Hex(9)	N[+1865]	1294.55	3	3881.62	3881.62	0	0	2109	Specific	442.04	339.36	339.36	7.76	175	>sp|P01266|THYG_HUMAN Thyroglobulin OS=Homo sapiens OX=9606 GN=TG PE=1 SV=5	17152	20210911_zy_tissue_ethcd_1.4992.4992.3	controllerType=0 controllerNumber=1 scan=4992	22.7177
05584:3	1	R.HFDVAHVSTAATSN[+1378.476]FSAVR.D	HexNAc(2)Hex(6)	N[+1378]	1132.49	3	3395.46	3395.46	0	-1.6	2109	Specific	443	380.5	380.5	9.46	175	>sp|P01266|THYG_HUMAN Thyroglobulin OS=Homo sapiens OX=9606 GN=TG PE=1 SV=5	17152	20210911_zy_tissue_ethcd_1.6145.6145.3	controllerType=0 controllerNumber=1 scan=6145	27.7186
05637:3	1	R.HFDVAHVSTAATSN[+1540.529]FSAVR.D	HexNAc(2)Hex(7)	N[+1541]	1186.51	3	3557.51	3557.52	0	-2.1	2109	Specific	443.98	325.66	325.66	8.22	175	>sp|P01266|THYG_HUMAN Thyroglobulin OS=Homo sapiens OX=9606 GN=TG PE=1 SV=5	17152	20210911_zy_tissue_ethcd_1.6203.6203.3	controllerType=0 controllerNumber=1 scan=6203	27.9816
06130:3	1	R.HFDVAHVSTAATSN[+1702.581]FSAVR.D	HexNAc(2)Hex(8)	N[+1703]	1240.53	3	3719.56	3719.57	0	-1.8	2109	Specific	445.41	317.34	317.34	8.24	175	>sp|P01266|THYG_HUMAN Thyroglobulin OS=Homo sapiens OX=9606 GN=TG PE=1 SV=5	17152	20210911_zy_tissue_ethcd_1.6744.6744.4	controllerType=0 controllerNumber=1 scan=6744	30.4507
04884:3	1	R.HFDVAHVSTAATSN[+1378.476]FSAVR.D	HexNAc(2)Hex(6)	N[+1378]	1132.49	3	3395.46	3395.46	0	-1.6	2109	Specific	446.23	357.11	357.11	8.38	175	>sp|P01266|THYG_HUMAN Thyroglobulin OS=Homo sapiens OX=9606 GN=TG PE=1 SV=5	17152	20210911_zy_tissue_ethcd_1.5376.5376.3	controllerType=0 controllerNumber=1 scan=5376	24.4308
04466:3	1	R.HFDVAHVSTAATSN[+1540.529]FSAVR.D	HexNAc(2)Hex(7)	N[+1541]	1186.51	3	3557.51	3557.52	0	-1.4	2109	Specific	450.43	374.37	374.37	8.5	175	>sp|P01266|THYG_HUMAN Thyroglobulin OS=Homo sapiens OX=9606 GN=TG PE=1 SV=5	17152	20210911_zy_tissue_ethcd_1.4918.4918.2	controllerType=0 controllerNumber=1 scan=4918	22.3841
05963:3	1	R.HFDVAHVSTAATSN[+1540.529]FSAVR.D	HexNAc(2)Hex(7)	N[+1541]	1186.51	3	3557.51	3557.52	0	-2.3	2109	Specific	451.58	351.72	351.72	8.37	175	>sp|P01266|THYG_HUMAN Thyroglobulin OS=Homo sapiens OX=9606 GN=TG PE=1 SV=5	17152	20210911_zy_tissue_ethcd_1.6561.6561.3	controllerType=0 controllerNumber=1 scan=6561	29.6084
04614:3	1	R.HFDVAHVSTAATSN[+1054.370]FSAVR.D	HexNAc(2)Hex(4)	N[+1054]	1024.45	3	3071.35	3071.36	0	-2.8	2109	Specific	455.89	382.09	382.09	9.3	175	>sp|P01266|THYG_HUMAN Thyroglobulin OS=Homo sapiens OX=9606 GN=TG PE=1 SV=5	17152	20210911_zy_tissue_ethcd_1.5080.5080.3	controllerType=0 controllerNumber=1 scan=5080	23.1139
06665:3	1	R.HFDVAHVSTAATSN[+1913.677]FSAVR.D	HexNAc(4)Hex(5)NeuAc(1)	N[+1914]	1310.89	3	3930.66	3930.67	0	-1.8	2109	Specific	462.91	269.11	269.11	8.09	175	>sp|P01266|THYG_HUMAN Thyroglobulin OS=Homo sapiens OX=9606 GN=TG PE=1 SV=5	17152	20210911_zy_tissue_ethcd_1.7332.7332.3	controllerType=0 controllerNumber=1 scan=7332	33.1139
05203:3	1	R.HFDVAHVSTAATSN[+1702.581]FSAVR.D	HexNAc(2)Hex(8)	N[+1703]	1240.53	3	3719.56	3719.57	0	-1.4	2109	Specific	464.03	368.18	368.18	8.52	175	>sp|P01266|THYG_HUMAN Thyroglobulin OS=Homo sapiens OX=9606 GN=TG PE=1 SV=5	17152	20210911_zy_tissue_ethcd_1.5728.5728.3	controllerType=0 controllerNumber=1 scan=5728	25.8954
05928:4	1	R.HFDVAHVSTAATSN[+2946.089]FSAVR.D	HexNAc(9)Hex(6)Fuc(1)	N[+2946]	1241.78	4	4964.1	4963.08	1	4	2109	Specific	467.01	22.89	22.89	5.27	175	>sp|P01266|THYG_HUMAN Thyroglobulin OS=Homo sapiens OX=9606 GN=TG PE=1 SV=5	17152	20210911_zy_tissue_ethcd_1.6522.6522.4	controllerType=0 controllerNumber=1 scan=6522	29.4326
04642:3	1	R.HFDVAHVSTAATSN[+1702.581]FSAVR.D	HexNAc(2)Hex(8)	N[+1703]	1240.53	3	3719.58	3719.57	0	2.3	2109	Specific	467.41	391.21	391.21	8.03	175	>sp|P01266|THYG_HUMAN Thyroglobulin OS=Homo sapiens OX=9606 GN=TG PE=1 SV=5	17152	20210911_zy_tissue_ethcd_1.5111.5111.3	controllerType=0 controllerNumber=1 scan=5111	23.2539
05521:3	1	R.HFDVAHVSTAATSN[+1378.476]FSAVR.D	HexNAc(2)Hex(6)	N[+1378]	1132.49	3	3395.46	3395.46	0	-1.9	2109	Specific	467.57	397.91	397.91	9.48	175	>sp|P01266|THYG_HUMAN Thyroglobulin OS=Homo sapiens OX=9606 GN=TG PE=1 SV=5	17152	20210911_zy_tissue_ethcd_1.6076.6076.3	controllerType=0 controllerNumber=1 scan=6076	27.4103
05699:3	1	R.HFDVAHVSTAATSN[+1540.529]FSAVR.D	HexNAc(2)Hex(7)	N[+1541]	1186.51	3	3557.51	3557.52	0	-0.8	2109	Specific	472.27	370.93	370.93	8.44	175	>sp|P01266|THYG_HUMAN Thyroglobulin OS=Homo sapiens OX=9606 GN=TG PE=1 SV=5	17152	20210911_zy_tissue_ethcd_1.6271.6271.3	controllerType=0 controllerNumber=1 scan=6271	28.2808
05801:3	1	R.HFDVAHVSTAATSN[+1378.476]FSAVR.D	HexNAc(2)Hex(6)	N[+1378]	1132.49	3	3395.46	3395.46	0	-2.3	2109	Specific	485.29	406.17	406.17	9.5	175	>sp|P01266|THYG_HUMAN Thyroglobulin OS=Homo sapiens OX=9606 GN=TG PE=1 SV=5	17152	20210911_zy_tissue_ethcd_1.6383.6383.3	controllerType=0 controllerNumber=1 scan=6383	28.7894
04440:3	1	R.HFDVAHVSTAATSN[+1864.634]FSAVR.D	HexNAc(2)Hex(9)	N[+1865]	1294.55	3	3881.62	3881.62	0	-0.6	2109	Specific	485.66	392.82	392.82	9.2	175	>sp|P01266|THYG_HUMAN Thyroglobulin OS=Homo sapiens OX=9606 GN=TG PE=1 SV=5	17152	20210911_zy_tissue_ethcd_1.4890.4890.3	controllerType=0 controllerNumber=1 scan=4890	22.2603
05709:3	1	R.HFDVAHVSTAATSN[+1864.634]FSAVR.D	HexNAc(2)Hex(9)	N[+1865]	1294.54	3	3881.61	3881.62	0	-2.1	2109	Specific	499.14	354.66	354.66	8.42	175	>sp|P01266|THYG_HUMAN Thyroglobulin OS=Homo sapiens OX=9606 GN=TG PE=1 SV=5	17152	20210911_zy_tissue_ethcd_1.6282.6282.3	controllerType=0 controllerNumber=1 scan=6282	28.3325
05100:3	1	R.HFDVAHVSTAATSN[+1702.581]FSAVR.D	HexNAc(2)Hex(8)	N[+1703]	1240.53	3	3719.56	3719.57	0	-1.7	2109	Specific	500.55	428.55	428.55	9.51	175	>sp|P01266|THYG_HUMAN Thyroglobulin OS=Homo sapiens OX=9606 GN=TG PE=1 SV=5	17152	20210911_zy_tissue_ethcd_1.5615.5615.3	controllerType=0 controllerNumber=1 scan=5615	25.4225
05823:3	1	R.HFDVAHVSTAATSN[+1540.529]FSAVR.D	HexNAc(2)Hex(7)	N[+1541]	1186.51	3	3557.51	3557.52	0	-1.5	2109	Specific	502.11	389.65	389.65	9.51	175	>sp|P01266|THYG_HUMAN Thyroglobulin OS=Homo sapiens OX=9606 GN=TG PE=1 SV=5	17152	20210911_zy_tissue_ethcd_1.6407.6407.3	controllerType=0 controllerNumber=1 scan=6407	28.8998
04602:3	1	R.HFDVAHVSTAATSN[+1378.476]FSAVR.D	HexNAc(2)Hex(6)	N[+1378]	1132.49	3	3395.45	3395.46	0	-3.8	2109	Specific	511.79	432.99	432.99	9.19	175	>sp|P01266|THYG_HUMAN Thyroglobulin OS=Homo sapiens OX=9606 GN=TG PE=1 SV=5	17152	20210911_zy_tissue_ethcd_1.5067.5067.3	controllerType=0 controllerNumber=1 scan=5067	23.0525
05762:3	1	R.HFDVAHVSTAATSN[+1702.581]FSAVR.D	HexNAc(2)Hex(8)	N[+1703]	1240.53	3	3719.56	3719.57	0	-2.2	2109	Specific	520.91	412.29	412.29	9.69	175	>sp|P01266|THYG_HUMAN Thyroglobulin OS=Homo sapiens OX=9606 GN=TG PE=1 SV=5	17152	20210911_zy_tissue_ethcd_1.6340.6340.3	controllerType=0 controllerNumber=1 scan=6340	28.5971
05605:3	1	R.HFDVAHVSTAATSN[+1702.581]FSAVR.D	HexNAc(2)Hex(8)	N[+1703]	1240.53	3	3719.57	3719.57	0	-1.1	2109	Specific	528.62	422	422	9.62	175	>sp|P01266|THYG_HUMAN Thyroglobulin OS=Homo sapiens OX=9606 GN=TG PE=1 SV=5	17152	20210911_zy_tissue_ethcd_1.6168.6168.3	controllerType=0 controllerNumber=1 scan=6168	27.8242
05110:3	1	R.HFDVAHVSTAATSN[+2026.687]FSAVR.D	HexNAc(2)Hex(10)	N[+2027]	1348.56	3	4043.67	4043.68	0	-1.2	2109	Specific	531.01	409.13	409.13	9.62	175	>sp|P01266|THYG_HUMAN Thyroglobulin OS=Homo sapiens OX=9606 GN=TG PE=1 SV=5	17152	20210911_zy_tissue_ethcd_1.5626.5626.3	controllerType=0 controllerNumber=1 scan=5626	25.469
04579:3	1	R.HFDVAHVSTAATSN[+1540.529]FSAVR.D	HexNAc(2)Hex(7)	N[+1541]	1186.51	3	3557.51	3557.52	0	-1.2	2109	Specific	536.35	428.75	428.75	9.62	175	>sp|P01266|THYG_HUMAN Thyroglobulin OS=Homo sapiens OX=9606 GN=TG PE=1 SV=5	17152	20210911_zy_tissue_ethcd_1.5042.5042.3	controllerType=0 controllerNumber=1 scan=5042	22.9393
05783:3	1	R.HFDVAHVSTAATSN[+1216.423]FSAVR.D	HexNAc(2)Hex(5)	N[+1216]	1078.47	3	3233.41	3233.41	0	-1.6	2109	Specific	536.75	436.78	436.78	9.7	175	>sp|P01266|THYG_HUMAN Thyroglobulin OS=Homo sapiens OX=9606 GN=TG PE=1 SV=5	17152	20210911_zy_tissue_ethcd_1.6363.6363.3	controllerType=0 controllerNumber=1 scan=6363	28.7017
04743:3	1	R.HFDVAHVSTAATSN[+1540.529]FSAVR.D	HexNAc(2)Hex(7)	N[+1541]	1186.51	3	3557.51	3557.52	0	-2.1	2109	Specific	538.96	425.02	425.02	9.74	175	>sp|P01266|THYG_HUMAN Thyroglobulin OS=Homo sapiens OX=9606 GN=TG PE=1 SV=5	17152	20210911_zy_tissue_ethcd_1.5222.5222.3	controllerType=0 controllerNumber=1 scan=5222	23.7515
04464:3	1	R.HFDVAHVSTAATSN[+1378.476]FSAVR.D	HexNAc(2)Hex(6)	N[+1378]	1132.49	3	3395.46	3395.46	0	-1.6	2109	Specific	540.51	433.62	433.62	9.75	175	>sp|P01266|THYG_HUMAN Thyroglobulin OS=Homo sapiens OX=9606 GN=TG PE=1 SV=5	17152	20210911_zy_tissue_ethcd_1.4916.4916.3	controllerType=0 controllerNumber=1 scan=4916	22.3749
05007:4	1	R.HFDVAHVSTAATSN[+1864.634]FSAVR.D	HexNAc(2)Hex(9)	N[+1865]	971.159	4	3881.62	3881.62	0	-1.9	2109	Specific	541.7	470.82	470.82	9.45	175	>sp|P01266|THYG_HUMAN Thyroglobulin OS=Homo sapiens OX=9606 GN=TG PE=1 SV=5	17152	20210911_zy_tissue_ethcd_1.5511.5511.3	controllerType=0 controllerNumber=1 scan=5511	25.0138
04947:3	1	R.HFDVAHVSTAATSN[+1378.476]FSAVR.D	HexNAc(2)Hex(6)	N[+1378]	1132.49	3	3395.46	3395.46	0	-1.8	2109	Specific	546.84	460.99	460.99	9.75	175	>sp|P01266|THYG_HUMAN Thyroglobulin OS=Homo sapiens OX=9606 GN=TG PE=1 SV=5	17152	20210911_zy_tissue_ethcd_1.5445.5445.3	controllerType=0 controllerNumber=1 scan=5445	24.7392
04896:3	1	R.HFDVAHVSTAATSN[+1216.423]FSAVR.D	HexNAc(2)Hex(5)	N[+1216]	1078.47	3	3233.41	3233.41	0	-1.3	2109	Specific	553.78	456.73	456.73	9.67	175	>sp|P01266|THYG_HUMAN Thyroglobulin OS=Homo sapiens OX=9606 GN=TG PE=1 SV=5	17152	20210911_zy_tissue_ethcd_1.5389.5389.3	controllerType=0 controllerNumber=1 scan=5389	24.4903
04810:3	1	R.HFDVAHVSTAATSN[+1216.423]FSAVR.D	HexNAc(2)Hex(5)	N[+1216]	1078.47	3	3233.4	3233.41	0	-2.6	2109	Specific	553.84	459.9	459.9	9.74	175	>sp|P01266|THYG_HUMAN Thyroglobulin OS=Homo sapiens OX=9606 GN=TG PE=1 SV=5	17152	20210911_zy_tissue_ethcd_1.5295.5295.3	controllerType=0 controllerNumber=1 scan=5295	24.0719
05523:3	1	R.HFDVAHVSTAATSN[+1216.423]FSAVR.D	HexNAc(2)Hex(5)	N[+1216]	1078.47	3	3233.4	3233.41	0	-2.4	2109	Specific	555.01	447.48	447.48	9.74	175	>sp|P01266|THYG_HUMAN Thyroglobulin OS=Homo sapiens OX=9606 GN=TG PE=1 SV=5	17152	20210911_zy_tissue_ethcd_1.6078.6078.3	controllerType=0 controllerNumber=1 scan=6078	27.4199
06104:3	1	R.HFDVAHVSTAATSN[+1702.581]FSAVR.D	HexNAc(2)Hex(8)	N[+1703]	1240.53	3	3719.56	3719.57	0	-1.4	2109	Specific	579.57	466.06	466.06	10.9	175	>sp|P01266|THYG_HUMAN Thyroglobulin OS=Homo sapiens OX=9606 GN=TG PE=1 SV=5	17152	20210911_zy_tissue_ethcd_1.6716.6716.3	controllerType=0 controllerNumber=1 scan=6716	30.3203
04851:3	1	R.HFDVAHVSTAATSN[+1864.634]FSAVR.D	HexNAc(2)Hex(9)	N[+1865]	1294.54	3	3881.62	3881.62	0	-0.8	2109	Specific	582.31	473.26	473.26	10.82	175	>sp|P01266|THYG_HUMAN Thyroglobulin OS=Homo sapiens OX=9606 GN=TG PE=1 SV=5	17152	20210911_zy_tissue_ethcd_1.5340.5340.3	controllerType=0 controllerNumber=1 scan=5340	24.2726
05500:3	1	R.HFDVAHVSTAATSN[+1540.529]FSAVR.D	HexNAc(2)Hex(7)	N[+1541]	1186.51	3	3557.51	3557.52	0	-1.9	2109	Specific	585.37	487.34	487.34	10.9	175	>sp|P01266|THYG_HUMAN Thyroglobulin OS=Homo sapiens OX=9606 GN=TG PE=1 SV=5	17152	20210911_zy_tissue_ethcd_1.6053.6053.3	controllerType=0 controllerNumber=1 scan=6053	27.3089
05325:3	1	R.HFDVAHVSTAATSN[+568.212]FSAVR.D	HexNAc(2)Hex(1)	N[+568]	862.404	3	2585.2	2585.2	0	-0.7	2109	Specific	591.67	539.51	539.51	10.6	175	>sp|P01266|THYG_HUMAN Thyroglobulin OS=Homo sapiens OX=9606 GN=TG PE=1 SV=5	17152	20210911_zy_tissue_ethcd_1.5861.5861.2	controllerType=0 controllerNumber=1 scan=5861	26.4618
04504:3	1	R.HFDVAHVSTAATSN[+1378.476]FSAVR.D	HexNAc(2)Hex(6)	N[+1378]	1132.49	3	3395.46	3395.46	0	-1.2	2109	Specific	597.42	499	499	10.82	175	>sp|P01266|THYG_HUMAN Thyroglobulin OS=Homo sapiens OX=9606 GN=TG PE=1 SV=5	17152	20210911_zy_tissue_ethcd_1.4960.4960.3	controllerType=0 controllerNumber=1 scan=4960	22.5726
05761:3	1	R.HFDVAHVSTAATSN[+1540.529]FSAVR.D	HexNAc(2)Hex(7)	N[+1541]	1186.51	3	3557.51	3557.52	0	-1.8	2109	Specific	601.16	490.63	490.63	11.9	175	>sp|P01266|THYG_HUMAN Thyroglobulin OS=Homo sapiens OX=9606 GN=TG PE=1 SV=5	17152	20210911_zy_tissue_ethcd_1.6339.6339.3	controllerType=0 controllerNumber=1 scan=6339	28.592
04462:3	1	R.HFDVAHVSTAATSN[+1702.581]FSAVR.D	HexNAc(2)Hex(8)	N[+1703]	1240.53	3	3719.57	3719.57	0	-1.1	2109	Specific	603.2	495.24	495.24	11.82	175	>sp|P01266|THYG_HUMAN Thyroglobulin OS=Homo sapiens OX=9606 GN=TG PE=1 SV=5	17152	20210911_zy_tissue_ethcd_1.4914.4914.3	controllerType=0 controllerNumber=1 scan=4914	22.3668
06687:3	1	R.HFDVAHVSTAATSN[+1872.651]FSAVR.D	HexNAc(3)Hex(6)NeuAc(1)	N[+1873]	1297.22	3	3889.63	3889.64	0	-1.4	2109	Specific	603.75	426.28	426.28	11.82	175	>sp|P01266|THYG_HUMAN Thyroglobulin OS=Homo sapiens OX=9606 GN=TG PE=1 SV=5	17152	20210911_zy_tissue_ethcd_1.7356.7356.3	controllerType=0 controllerNumber=1 scan=7356	33.2219
04572:4	1	R.HFDVAHVSTAATSN[+1702.581]FSAVR.D	HexNAc(2)Hex(8)	N[+1703]	930.644	4	3719.55	3719.57	0	-4.1	2109	Specific	603.94	549.05	549.05	11.3	175	>sp|P01266|THYG_HUMAN Thyroglobulin OS=Homo sapiens OX=9606 GN=TG PE=1 SV=5	17152	20210911_zy_tissue_ethcd_1.5034.5034.4	controllerType=0 controllerNumber=1 scan=5034	22.9037
04970:3	1	R.HFDVAHVSTAATSN[+1702.581]FSAVR.D	HexNAc(2)Hex(8)	N[+1703]	1240.53	3	3719.57	3719.57	0	-0.8	2109	Specific	604.3	499.08	499.08	11.82	175	>sp|P01266|THYG_HUMAN Thyroglobulin OS=Homo sapiens OX=9606 GN=TG PE=1 SV=5	17152	20210911_zy_tissue_ethcd_1.5470.5470.3	controllerType=0 controllerNumber=1 scan=5470	24.85
04670:3	1	R.HFDVAHVSTAATSN[+1378.476]FSAVR.D	HexNAc(2)Hex(6)	N[+1378]	1132.49	3	3395.46	3395.46	0	-2.4	2109	Specific	610.06	525.26	525.26	11.89	175	>sp|P01266|THYG_HUMAN Thyroglobulin OS=Homo sapiens OX=9606 GN=TG PE=1 SV=5	17152	20210911_zy_tissue_ethcd_1.5142.5142.3	controllerType=0 controllerNumber=1 scan=5142	23.3925
04649:3	1	R.HFDVAHVSTAATSN[+1540.529]FSAVR.D	HexNAc(2)Hex(7)	N[+1541]	1186.51	3	3557.51	3557.52	0	-2.1	2109	Specific	611.49	514.96	514.96	11.89	175	>sp|P01266|THYG_HUMAN Thyroglobulin OS=Homo sapiens OX=9606 GN=TG PE=1 SV=5	17152	20210911_zy_tissue_ethcd_1.5119.5119.3	controllerType=0 controllerNumber=1 scan=5119	23.2891
04396:3	1	R.HFDVAHVSTAATSN[+1702.581]FSAVR.D	HexNAc(2)Hex(8)	N[+1703]	1240.53	3	3719.57	3719.57	0	-1.3	2109	Specific	616.05	510.7	510.7	11.82	175	>sp|P01266|THYG_HUMAN Thyroglobulin OS=Homo sapiens OX=9606 GN=TG PE=1 SV=5	17152	20210911_zy_tissue_ethcd_1.4842.4842.3	controllerType=0 controllerNumber=1 scan=4842	22.0481
05044:3	1	R.HFDVAHVSTAATSN[+1378.476]FSAVR.D	HexNAc(2)Hex(6)	N[+1378]	1132.49	3	3395.47	3395.46	0	0.4	2109	Specific	625.37	534.87	534.87	11.28	175	>sp|P01266|THYG_HUMAN Thyroglobulin OS=Homo sapiens OX=9606 GN=TG PE=1 SV=5	17152	20210911_zy_tissue_ethcd_1.5552.5552.3	controllerType=0 controllerNumber=1 scan=5552	25.1754
04950:3	1	R.HFDVAHVSTAATSN[+1864.634]FSAVR.D	HexNAc(2)Hex(9)	N[+1865]	1294.54	3	3881.62	3881.62	0	-0.8	2109	Specific	625.92	525.2	525.2	11.82	175	>sp|P01266|THYG_HUMAN Thyroglobulin OS=Homo sapiens OX=9606 GN=TG PE=1 SV=5	17152	20210911_zy_tissue_ethcd_1.5448.5448.3	controllerType=0 controllerNumber=1 scan=5448	24.7524
05039:3	1	R.HFDVAHVSTAATSN[+1378.476]FSAVR.D	HexNAc(2)Hex(6)	N[+1378]	1132.49	3	3395.46	3395.46	0	-1.5	2109	Specific	626.44	540.6	540.6	11.9	175	>sp|P01266|THYG_HUMAN Thyroglobulin OS=Homo sapiens OX=9606 GN=TG PE=1 SV=5	17152	20210911_zy_tissue_ethcd_1.5546.5546.3	controllerType=0 controllerNumber=1 scan=5546	25.1505
05380:3	1	R.HFDVAHVSTAATSN[+1378.476]FSAVR.D	HexNAc(2)Hex(6)	N[+1378]	1132.49	3	3395.46	3395.46	0	-2.2	2109	Specific	627.84	523.46	523.46	11.89	175	>sp|P01266|THYG_HUMAN Thyroglobulin OS=Homo sapiens OX=9606 GN=TG PE=1 SV=5	17152	20210911_zy_tissue_ethcd_1.5922.5922.3	controllerType=0 controllerNumber=1 scan=5922	26.7294
06023:3	1	R.HFDVAHVSTAATSN[+1702.581]FSAVR.D	HexNAc(2)Hex(8)	N[+1703]	1240.53	3	3719.56	3719.57	0	-1.9	2109	Specific	630.57	520.77	520.77	11.9	175	>sp|P01266|THYG_HUMAN Thyroglobulin OS=Homo sapiens OX=9606 GN=TG PE=1 SV=5	17152	20210911_zy_tissue_ethcd_1.6627.6627.3	controllerType=0 controllerNumber=1 scan=6627	29.9125
04840:3	1	R.HFDVAHVSTAATSN[+1540.529]FSAVR.D	HexNAc(2)Hex(7)	N[+1541]	1186.51	3	3557.51	3557.52	0	-1.3	2109	Specific	630.97	501.93	501.93	11.82	175	>sp|P01266|THYG_HUMAN Thyroglobulin OS=Homo sapiens OX=9606 GN=TG PE=1 SV=5	17152	20210911_zy_tissue_ethcd_1.5328.5328.3	controllerType=0 controllerNumber=1 scan=5328	24.2204
04958:4	1	R.HFDVAHVSTAATSN[+1864.634]FSAVR.D	HexNAc(2)Hex(9)	N[+1865]	971.158	4	3881.61	3881.62	0	-3	2109	Specific	632.13	514.17	514.17	11.43	175	>sp|P01266|THYG_HUMAN Thyroglobulin OS=Homo sapiens OX=9606 GN=TG PE=1 SV=5	17152	20210911_zy_tissue_ethcd_1.5457.5457.4	controllerType=0 controllerNumber=1 scan=5457	24.793
05447:4	1	R.HFDVAHVSTAATSN[+1378.476]FSAVR.D	HexNAc(2)Hex(6)	N[+1378]	849.62	4	3395.46	3395.46	0	-1.6	2109	Specific	632.4	530.09	530.09	11.61	175	>sp|P01266|THYG_HUMAN Thyroglobulin OS=Homo sapiens OX=9606 GN=TG PE=1 SV=5	17152	20210911_zy_tissue_ethcd_1.5995.5995.4	controllerType=0 controllerNumber=1 scan=5995	27.0532
05056:3	1	R.HFDVAHVSTAATSN[+1702.581]FSAVR.D	HexNAc(2)Hex(8)	N[+1703]	1240.53	3	3719.57	3719.57	0	-1.2	2109	Specific	633.09	510.34	510.34	11.82	175	>sp|P01266|THYG_HUMAN Thyroglobulin OS=Homo sapiens OX=9606 GN=TG PE=1 SV=5	17152	20210911_zy_tissue_ethcd_1.5566.5566.3	controllerType=0 controllerNumber=1 scan=5566	25.2317
06105:3	1	R.HFDVAHVSTAATSN[+1378.476]FSAVR.D	HexNAc(2)Hex(6)	N[+1378]	1132.49	3	3395.46	3395.46	0	-1.9	2109	Specific	634.58	539.5	539.5	11.9	175	>sp|P01266|THYG_HUMAN Thyroglobulin OS=Homo sapiens OX=9606 GN=TG PE=1 SV=5	17152	20210911_zy_tissue_ethcd_1.6717.6717.3	controllerType=0 controllerNumber=1 scan=6717	30.3253
05402:3	1	R.HFDVAHVSTAATSN[+1702.581]FSAVR.D	HexNAc(2)Hex(8)	N[+1703]	1240.53	3	3719.56	3719.57	0	-2.2	2109	Specific	635.45	527.69	527.69	11.89	175	>sp|P01266|THYG_HUMAN Thyroglobulin OS=Homo sapiens OX=9606 GN=TG PE=1 SV=5	17152	20210911_zy_tissue_ethcd_1.5946.5946.3	controllerType=0 controllerNumber=1 scan=5946	26.8358
05228:3	1	R.HFDVAHVSTAATSN[+1864.634]FSAVR.D	HexNAc(2)Hex(9)	N[+1865]	1294.54	3	3881.62	3881.62	0	-1.1	2109	Specific	636.49	516.72	516.72	11.82	175	>sp|P01266|THYG_HUMAN Thyroglobulin OS=Homo sapiens OX=9606 GN=TG PE=1 SV=5	17152	20210911_zy_tissue_ethcd_1.5756.5756.3	controllerType=0 controllerNumber=1 scan=5756	26.0136
05382:3	1	R.HFDVAHVSTAATSN[+1864.634]FSAVR.D	HexNAc(2)Hex(9)	N[+1865]	1294.54	3	3881.62	3881.62	0	-1.3	2109	Specific	636.7	515.36	515.36	11.82	175	>sp|P01266|THYG_HUMAN Thyroglobulin OS=Homo sapiens OX=9606 GN=TG PE=1 SV=5	17152	20210911_zy_tissue_ethcd_1.5924.5924.3	controllerType=0 controllerNumber=1 scan=5924	26.7375
05183:3	1	R.HFDVAHVSTAATSN[+1378.476]FSAVR.D	HexNAc(2)Hex(6)	N[+1378]	1132.49	3	3395.46	3395.46	0	-1.6	2109	Specific	636.87	545.97	545.97	11.9	175	>sp|P01266|THYG_HUMAN Thyroglobulin OS=Homo sapiens OX=9606 GN=TG PE=1 SV=5	17152	20210911_zy_tissue_ethcd_1.5707.5707.3	controllerType=0 controllerNumber=1 scan=5707	25.8061
05113:3	1	R.HFDVAHVSTAATSN[+1378.476]FSAVR.D	HexNAc(2)Hex(6)	N[+1378]	1132.49	3	3395.46	3395.46	0	-1.7	2109	Specific	638.34	537.76	537.76	11.9	175	>sp|P01266|THYG_HUMAN Thyroglobulin OS=Homo sapiens OX=9606 GN=TG PE=1 SV=5	17152	20210911_zy_tissue_ethcd_1.5630.5630.3	controllerType=0 controllerNumber=1 scan=5630	25.4847
05853:3	1	R.HFDVAHVSTAATSN[+1216.423]FSAVR.D	HexNAc(2)Hex(5)	N[+1216]	1078.47	3	3233.41	3233.41	0	-2	2109	Specific	641.61	521.1	521.1	11.9	175	>sp|P01266|THYG_HUMAN Thyroglobulin OS=Homo sapiens OX=9606 GN=TG PE=1 SV=5	17152	20210911_zy_tissue_ethcd_1.6440.6440.3	controllerType=0 controllerNumber=1 scan=6440	29.0514
05263:3	1	R.HFDVAHVSTAATSN[+1702.581]FSAVR.D	HexNAc(2)Hex(8)	N[+1703]	1240.53	3	3719.57	3719.57	0	-1.3	2109	Specific	649.07	520.3	520.3	11.82	175	>sp|P01266|THYG_HUMAN Thyroglobulin OS=Homo sapiens OX=9606 GN=TG PE=1 SV=5	17152	20210911_zy_tissue_ethcd_1.5794.5794.3	controllerType=0 controllerNumber=1 scan=5794	26.1691
05533:4	1	R.HFDVAHVSTAATSN[+1216.423]FSAVR.D	HexNAc(2)Hex(5)	N[+1216]	809.109	4	3233.41	3233.41	0	1.1	2109	Specific	649.52	553.67	553.67	10.72	175	>sp|P01266|THYG_HUMAN Thyroglobulin OS=Homo sapiens OX=9606 GN=TG PE=1 SV=5	17152	20210911_zy_tissue_ethcd_1.6089.6089.4	controllerType=0 controllerNumber=1 scan=6089	27.4687
05316:3	1	R.HFDVAHVSTAATSN[+1378.476]FSAVR.D	HexNAc(2)Hex(6)	N[+1378]	1132.49	3	3395.46	3395.46	0	-1.4	2109	Specific	653.1	560.9	560.9	12.9	175	>sp|P01266|THYG_HUMAN Thyroglobulin OS=Homo sapiens OX=9606 GN=TG PE=1 SV=5	17152	20210911_zy_tissue_ethcd_1.5852.5852.3	controllerType=0 controllerNumber=1 scan=5852	26.4222
05756:3	1	R.HFDVAHVSTAATSN[+406.159]FSAVR.D	HexNAc(2)	N[+406]	808.385	3	2423.14	2423.15	0	-2.3	2109	Specific	653.94	616.63	616.63	12.89	175	>sp|P01266|THYG_HUMAN Thyroglobulin OS=Homo sapiens OX=9606 GN=TG PE=1 SV=5	17152	20210911_zy_tissue_ethcd_1.6333.6333.3	controllerType=0 controllerNumber=1 scan=6333	28.5674
05019:3	1	R.HFDVAHVSTAATSN[+1378.476]FSAVR.D	HexNAc(2)Hex(6)	N[+1378]	1132.49	3	3395.45	3395.46	0	-4.4	2109	Specific	654.97	560.14	560.14	12.6	175	>sp|P01266|THYG_HUMAN Thyroglobulin OS=Homo sapiens OX=9606 GN=TG PE=1 SV=5	17152	20210911_zy_tissue_ethcd_1.5524.5524.3	controllerType=0 controllerNumber=1 scan=5524	25.059
05328:3	1	R.HFDVAHVSTAATSN[+1702.581]FSAVR.D	HexNAc(2)Hex(8)	N[+1703]	1240.53	3	3719.56	3719.57	0	-1.7	2109	Specific	655.92	552.72	552.72	12.9	175	>sp|P01266|THYG_HUMAN Thyroglobulin OS=Homo sapiens OX=9606 GN=TG PE=1 SV=5	17152	20210911_zy_tissue_ethcd_1.5865.5865.3	controllerType=0 controllerNumber=1 scan=5865	26.4759
04588:3	1	R.HFDVAHVSTAATSN[+1540.529]FSAVR.D	HexNAc(2)Hex(7)	N[+1541]	1186.51	3	3557.51	3557.52	0	-1.7	2109	Specific	658.14	522.68	522.68	12.9	175	>sp|P01266|THYG_HUMAN Thyroglobulin OS=Homo sapiens OX=9606 GN=TG PE=1 SV=5	17152	20210911_zy_tissue_ethcd_1.5052.5052.3	controllerType=0 controllerNumber=1 scan=5052	22.98
05251:3	1	R.HFDVAHVSTAATSN[+1378.476]FSAVR.D	HexNAc(2)Hex(6)	N[+1378]	1132.49	3	3395.46	3395.46	0	-1.8	2109	Specific	658.19	566.77	566.77	12.9	175	>sp|P01266|THYG_HUMAN Thyroglobulin OS=Homo sapiens OX=9606 GN=TG PE=1 SV=5	17152	20210911_zy_tissue_ethcd_1.5781.5781.3	controllerType=0 controllerNumber=1 scan=5781	26.1173
04376:3	1	R.HFDVAHVSTAATSN[+1864.634]FSAVR.D	HexNAc(2)Hex(9)	N[+1865]	1294.54	3	3881.62	3881.62	0	-1.2	2109	Specific	661.42	551.96	551.96	12.82	175	>sp|P01266|THYG_HUMAN Thyroglobulin OS=Homo sapiens OX=9606 GN=TG PE=1 SV=5	17152	20210911_zy_tissue_ethcd_1.4820.4820.3	controllerType=0 controllerNumber=1 scan=4820	21.9493
05017:3	1	R.HFDVAHVSTAATSN[+1540.529]FSAVR.D	HexNAc(2)Hex(7)	N[+1541]	1186.51	3	3557.51	3557.52	0	-2.8	2109	Specific	663.24	549.01	549.01	12.73	175	>sp|P01266|THYG_HUMAN Thyroglobulin OS=Homo sapiens OX=9606 GN=TG PE=1 SV=5	17152	20210911_zy_tissue_ethcd_1.5522.5522.3	controllerType=0 controllerNumber=1 scan=5522	25.0502
05294:3	1	R.HFDVAHVSTAATSN[+1864.634]FSAVR.D	HexNAc(2)Hex(9)	N[+1865]	1294.54	3	3881.62	3881.62	0	-0.9	2109	Specific	668.32	553.32	553.32	12.82	175	>sp|P01266|THYG_HUMAN Thyroglobulin OS=Homo sapiens OX=9606 GN=TG PE=1 SV=5	17152	20210911_zy_tissue_ethcd_1.5828.5828.3	controllerType=0 controllerNumber=1 scan=5828	26.319
04418:3	1	R.HFDVAHVSTAATSN[+1540.529]FSAVR.D	HexNAc(2)Hex(7)	N[+1541]	1186.51	3	3557.51	3557.52	0	-1.2	2109	Specific	671.95	563.31	563.31	12.82	175	>sp|P01266|THYG_HUMAN Thyroglobulin OS=Homo sapiens OX=9606 GN=TG PE=1 SV=5	17152	20210911_zy_tissue_ethcd_1.4866.4866.3	controllerType=0 controllerNumber=1 scan=4866	22.1547
06013:3	1	R.HFDVAHVSTAATSN[+1864.634]FSAVR.D	HexNAc(2)Hex(9)	N[+1865]	1294.54	3	3881.62	3881.62	0	-1.4	2109	Specific	672.78	527.37	527.37	12.82	175	>sp|P01266|THYG_HUMAN Thyroglobulin OS=Homo sapiens OX=9606 GN=TG PE=1 SV=5	17152	20210911_zy_tissue_ethcd_1.6616.6616.3	controllerType=0 controllerNumber=1 scan=6616	29.8624
05369:3	1	R.HFDVAHVSTAATSN[+1540.529]FSAVR.D	HexNAc(2)Hex(7)	N[+1541]	1186.51	3	3557.51	3557.52	0	-1.5	2109	Specific	672.94	564.31	564.31	12.9	175	>sp|P01266|THYG_HUMAN Thyroglobulin OS=Homo sapiens OX=9606 GN=TG PE=1 SV=5	17152	20210911_zy_tissue_ethcd_1.5910.5910.3	controllerType=0 controllerNumber=1 scan=5910	26.6765
04967:3	1	R.HFDVAHVSTAATSN[+1216.423]FSAVR.D	HexNAc(2)Hex(5)	N[+1216]	1078.47	3	3233.41	3233.41	0	-1.9	2109	Specific	673.3	549.6	549.6	12.9	175	>sp|P01266|THYG_HUMAN Thyroglobulin OS=Homo sapiens OX=9606 GN=TG PE=1 SV=5	17152	20210911_zy_tissue_ethcd_1.5467.5467.3	controllerType=0 controllerNumber=1 scan=5467	24.8362
06094:3	1	R.HFDVAHVSTAATSN[+1540.529]FSAVR.D	HexNAc(2)Hex(7)	N[+1541]	1186.51	3	3557.51	3557.52	0	-1.2	2109	Specific	673.63	543.49	543.49	12.82	175	>sp|P01266|THYG_HUMAN Thyroglobulin OS=Homo sapiens OX=9606 GN=TG PE=1 SV=5	17152	20210911_zy_tissue_ethcd_1.6705.6705.3	controllerType=0 controllerNumber=1 scan=6705	30.2704
04641:3	1	R.HFDVAHVSTAATSN[+1216.423]FSAVR.D	HexNAc(2)Hex(5)	N[+1216]	1078.47	3	3233.41	3233.41	0	-1.9	2109	Specific	682.56	546.03	546.03	12.9	175	>sp|P01266|THYG_HUMAN Thyroglobulin OS=Homo sapiens OX=9606 GN=TG PE=1 SV=5	17152	20210911_zy_tissue_ethcd_1.5110.5110.3	controllerType=0 controllerNumber=1 scan=5110	23.2493
05162:3	1	R.HFDVAHVSTAATSN[+1540.529]FSAVR.D	HexNAc(2)Hex(7)	N[+1541]	1186.51	3	3557.51	3557.52	0	-2.4	2109	Specific	683.56	564.81	564.81	12.89	175	>sp|P01266|THYG_HUMAN Thyroglobulin OS=Homo sapiens OX=9606 GN=TG PE=1 SV=5	17152	20210911_zy_tissue_ethcd_1.5684.5684.3	controllerType=0 controllerNumber=1 scan=5684	25.7127
05015:3	1	R.HFDVAHVSTAATSN[+1864.634]FSAVR.D	HexNAc(2)Hex(9)	N[+1865]	1294.54	3	3881.62	3881.62	0	-1.1	2109	Specific	684.5	551.82	551.82	12.82	175	>sp|P01266|THYG_HUMAN Thyroglobulin OS=Homo sapiens OX=9606 GN=TG PE=1 SV=5	17152	20210911_zy_tissue_ethcd_1.5520.5520.3	controllerType=0 controllerNumber=1 scan=5520	25.0435
05239:3	1	R.HFDVAHVSTAATSN[+1540.529]FSAVR.D	HexNAc(2)Hex(7)	N[+1541]	1186.51	3	3557.51	3557.52	0	-2.2	2109	Specific	688.81	577.27	577.27	12.89	175	>sp|P01266|THYG_HUMAN Thyroglobulin OS=Homo sapiens OX=9606 GN=TG PE=1 SV=5	17152	20210911_zy_tissue_ethcd_1.5768.5768.3	controllerType=0 controllerNumber=1 scan=5768	26.0637
05121:3	1	R.HFDVAHVSTAATSN[+1702.581]FSAVR.D	HexNAc(2)Hex(8)	N[+1703]	1240.53	3	3719.56	3719.57	0	-2	2109	Specific	689.22	578.15	578.15	12.89	175	>sp|P01266|THYG_HUMAN Thyroglobulin OS=Homo sapiens OX=9606 GN=TG PE=1 SV=5	17152	20210911_zy_tissue_ethcd_1.5639.5639.3	controllerType=0 controllerNumber=1 scan=5639	25.5228
04905:3	1	R.HFDVAHVSTAATSN[+1540.529]FSAVR.D	HexNAc(2)Hex(7)	N[+1541]	1186.51	3	3557.51	3557.52	0	-2.3	2109	Specific	691.02	587.31	587.31	12.89	175	>sp|P01266|THYG_HUMAN Thyroglobulin OS=Homo sapiens OX=9606 GN=TG PE=1 SV=5	17152	20210911_zy_tissue_ethcd_1.5399.5399.3	controllerType=0 controllerNumber=1 scan=5399	24.5321
05304:3	1	R.HFDVAHVSTAATSN[+1378.476]FSAVR.D	HexNAc(2)Hex(6)	N[+1378]	1132.49	3	3395.46	3395.46	0	-1.3	2109	Specific	693.66	605.48	605.48	12.82	175	>sp|P01266|THYG_HUMAN Thyroglobulin OS=Homo sapiens OX=9606 GN=TG PE=1 SV=5	17152	20210911_zy_tissue_ethcd_1.5838.5838.2	controllerType=0 controllerNumber=1 scan=5838	26.3652
05436:3	1	R.HFDVAHVSTAATSN[+1540.529]FSAVR.D	HexNAc(2)Hex(7)	N[+1541]	1186.51	3	3557.51	3557.52	0	-2.1	2109	Specific	694.07	577.91	577.91	12.89	175	>sp|P01266|THYG_HUMAN Thyroglobulin OS=Homo sapiens OX=9606 GN=TG PE=1 SV=5	17152	20210911_zy_tissue_ethcd_1.5983.5983.3	controllerType=0 controllerNumber=1 scan=5983	26.9988
04483:3	1	R.HFDVAHVSTAATSN[+1540.529]FSAVR.D	HexNAc(2)Hex(7)	N[+1541]	1186.51	3	3557.51	3557.52	0	-1.5	2109	Specific	698.52	591.21	591.21	12.9	175	>sp|P01266|THYG_HUMAN Thyroglobulin OS=Homo sapiens OX=9606 GN=TG PE=1 SV=5	17152	20210911_zy_tissue_ethcd_1.4937.4937.3	controllerType=0 controllerNumber=1 scan=4937	22.468
06165:3	1	R.HFDVAHVSTAATSN[+1216.423]FSAVR.D	HexNAc(2)Hex(5)	N[+1216]	1078.47	3	3233.41	3233.41	0	-1.6	2109	Specific	701.61	577.66	577.66	13.9	175	>sp|P01266|THYG_HUMAN Thyroglobulin OS=Homo sapiens OX=9606 GN=TG PE=1 SV=5	17152	20210911_zy_tissue_ethcd_1.6783.6783.3	controllerType=0 controllerNumber=1 scan=6783	30.6241
05763:3	1	R.HFDVAHVSTAATSN[+406.159]FSAVR.D	HexNAc(2)	N[+406]	808.386	3	2423.14	2423.15	0	-1.9	2109	Specific	701.83	662.78	662.78	13.9	175	>sp|P01266|THYG_HUMAN Thyroglobulin OS=Homo sapiens OX=9606 GN=TG PE=1 SV=5	17152	20210911_zy_tissue_ethcd_1.6341.6341.3	controllerType=0 controllerNumber=1 scan=6341	28.6017
05456:3	1	R.HFDVAHVSTAATSN[+1216.423]FSAVR.D	HexNAc(2)Hex(5)	N[+1216]	1078.47	3	3233.41	3233.41	0	-1.6	2109	Specific	702.92	594.26	594.26	13.9	175	>sp|P01266|THYG_HUMAN Thyroglobulin OS=Homo sapiens OX=9606 GN=TG PE=1 SV=5	17152	20210911_zy_tissue_ethcd_1.6005.6005.3	controllerType=0 controllerNumber=1 scan=6005	27.0965
05095:3	1	R.HFDVAHVSTAATSN[+1540.529]FSAVR.D	HexNAc(2)Hex(7)	N[+1541]	1186.51	3	3557.51	3557.52	0	-2.1	2109	Specific	704.81	583.89	583.89	13.89	175	>sp|P01266|THYG_HUMAN Thyroglobulin OS=Homo sapiens OX=9606 GN=TG PE=1 SV=5	17152	20210911_zy_tissue_ethcd_1.5610.5610.3	controllerType=0 controllerNumber=1 scan=5610	25.4039
05305:3	1	R.HFDVAHVSTAATSN[+1540.529]FSAVR.D	HexNAc(2)Hex(7)	N[+1541]	1186.51	3	3557.51	3557.52	0	-1.3	2109	Specific	708.82	596.68	596.68	13.82	175	>sp|P01266|THYG_HUMAN Thyroglobulin OS=Homo sapiens OX=9606 GN=TG PE=1 SV=5	17152	20210911_zy_tissue_ethcd_1.5840.5840.3	controllerType=0 controllerNumber=1 scan=5840	26.3722
05240:3	1	R.HFDVAHVSTAATSN[+1054.370]FSAVR.D	HexNAc(2)Hex(4)	N[+1054]	1024.46	3	3071.35	3071.36	0	-1.9	2109	Specific	709.5	630.81	630.81	13.9	175	>sp|P01266|THYG_HUMAN Thyroglobulin OS=Homo sapiens OX=9606 GN=TG PE=1 SV=5	17152	20210911_zy_tissue_ethcd_1.5769.5769.3	controllerType=0 controllerNumber=1 scan=5769	26.066
05327:3	1	R.HFDVAHVSTAATSN[+1216.423]FSAVR.D	HexNAc(2)Hex(5)	N[+1216]	1078.47	3	3233.41	3233.41	0	-2	2109	Specific	711.61	604.42	604.42	13.9	175	>sp|P01266|THYG_HUMAN Thyroglobulin OS=Homo sapiens OX=9606 GN=TG PE=1 SV=5	17152	20210911_zy_tissue_ethcd_1.5864.5864.3	controllerType=0 controllerNumber=1 scan=5864	26.4733
05262:3	1	R.HFDVAHVSTAATSN[+1216.423]FSAVR.D	HexNAc(2)Hex(5)	N[+1216]	1078.47	3	3233.4	3233.41	0	-2.1	2109	Specific	718.79	598.38	598.38	13.89	175	>sp|P01266|THYG_HUMAN Thyroglobulin OS=Homo sapiens OX=9606 GN=TG PE=1 SV=5	17152	20210911_zy_tissue_ethcd_1.5793.5793.3	controllerType=0 controllerNumber=1 scan=5793	26.1667
05080:3	1	R.HFDVAHVSTAATSN[+1864.634]FSAVR.D	HexNAc(2)Hex(9)	N[+1865]	1294.55	3	3881.62	3881.62	0	-0.2	2109	Specific	721.04	572.07	572.07	13.6	175	>sp|P01266|THYG_HUMAN Thyroglobulin OS=Homo sapiens OX=9606 GN=TG PE=1 SV=5	17152	20210911_zy_tissue_ethcd_1.5593.5593.3	controllerType=0 controllerNumber=1 scan=5593	25.3374
05459:3	1	R.HFDVAHVSTAATSN[+1054.370]FSAVR.D	HexNAc(2)Hex(4)	N[+1054]	1024.46	3	3071.35	3071.36	0	-2.1	2109	Specific	722.7	594.04	594.04	13.89	175	>sp|P01266|THYG_HUMAN Thyroglobulin OS=Homo sapiens OX=9606 GN=TG PE=1 SV=5	17152	20210911_zy_tissue_ethcd_1.6008.6008.3	controllerType=0 controllerNumber=1 scan=6008	27.1101
05014:4	1	R.HFDVAHVSTAATSN[+1540.529]FSAVR.D	HexNAc(2)Hex(7)	N[+1541]	890.132	4	3557.5	3557.52	0	-3.6	2109	Specific	729.04	627.89	627.89	13.29	175	>sp|P01266|THYG_HUMAN Thyroglobulin OS=Homo sapiens OX=9606 GN=TG PE=1 SV=5	17152	20210911_zy_tissue_ethcd_1.5518.5518.2	controllerType=0 controllerNumber=1 scan=5518	25.0379
05361:3	1	R.HFDVAHVSTAATSN[+730.264]FSAVR.D	HexNAc(2)Hex(2)	N[+730]	916.422	3	2747.25	2747.25	0	-0.7	2109	Specific	737.95	679.16	679.16	13.6	175	>sp|P01266|THYG_HUMAN Thyroglobulin OS=Homo sapiens OX=9606 GN=TG PE=1 SV=5	17152	20210911_zy_tissue_ethcd_1.5901.5901.3	controllerType=0 controllerNumber=1 scan=5901	26.6345
05381:3	1	R.HFDVAHVSTAATSN[+1054.370]FSAVR.D	HexNAc(2)Hex(4)	N[+1054]	1024.46	3	3071.35	3071.36	0	-2.2	2109	Specific	745.18	659.4	659.4	13.89	175	>sp|P01266|THYG_HUMAN Thyroglobulin OS=Homo sapiens OX=9606 GN=TG PE=1 SV=5	17152	20210911_zy_tissue_ethcd_1.5923.5923.3	controllerType=0 controllerNumber=1 scan=5923	26.7329
05001:4	1	R.HFDVAHVSTAATSN[+1864.634]FSAVR.D	HexNAc(2)Hex(9)	N[+1865]	971.159	4	3881.62	3881.62	0	-1.7	2109	Specific	747.63	626.88	626.88	13.61	175	>sp|P01266|THYG_HUMAN Thyroglobulin OS=Homo sapiens OX=9606 GN=TG PE=1 SV=5	17152	20210911_zy_tissue_ethcd_1.5504.5504.3	controllerType=0 controllerNumber=1 scan=5504	24.991
05166:3	1	R.HFDVAHVSTAATSN[+1054.370]FSAVR.D	HexNAc(2)Hex(4)	N[+1054]	1024.46	3	3071.35	3071.36	0	-2.6	2109	Specific	748.02	660.2	660.2	13.89	175	>sp|P01266|THYG_HUMAN Thyroglobulin OS=Homo sapiens OX=9606 GN=TG PE=1 SV=5	17152	20210911_zy_tissue_ethcd_1.5688.5688.3	controllerType=0 controllerNumber=1 scan=5688	25.7261
05097:3	1	R.HFDVAHVSTAATSN[+1054.370]FSAVR.D	HexNAc(2)Hex(4)	N[+1054]	1024.46	3	3071.35	3071.36	0	-2.3	2109	Specific	750.03	663.39	663.39	14.89	175	>sp|P01266|THYG_HUMAN Thyroglobulin OS=Homo sapiens OX=9606 GN=TG PE=1 SV=5	17152	20210911_zy_tissue_ethcd_1.5612.5612.3	controllerType=0 controllerNumber=1 scan=5612	25.4105
05051:3	1	R.HFDVAHVSTAATSN[+1216.423]FSAVR.D	HexNAc(2)Hex(5)	N[+1216]	1078.47	3	3233.4	3233.41	0	-3.1	2109	Specific	751.15	624.67	624.67	14.73	175	>sp|P01266|THYG_HUMAN Thyroglobulin OS=Homo sapiens OX=9606 GN=TG PE=1 SV=5	17152	20210911_zy_tissue_ethcd_1.5560.5560.3	controllerType=0 controllerNumber=1 scan=5560	25.2081
05059:3	1	R.HFDVAHVSTAATSN[+1054.370]FSAVR.D	HexNAc(2)Hex(4)	N[+1054]	1024.45	3	3071.34	3071.36	0	-5.4	2109	Specific	753.21	667.9	667.9	14.7	175	>sp|P01266|THYG_HUMAN Thyroglobulin OS=Homo sapiens OX=9606 GN=TG PE=1 SV=5	17152	20210911_zy_tissue_ethcd_1.5569.5569.3	controllerType=0 controllerNumber=1 scan=5569	25.2393
05196:3	1	R.HFDVAHVSTAATSN[+1216.423]FSAVR.D	HexNAc(2)Hex(5)	N[+1216]	1078.47	3	3233.41	3233.41	0	-2	2109	Specific	753.45	624.4	624.4	14.9	175	>sp|P01266|THYG_HUMAN Thyroglobulin OS=Homo sapiens OX=9606 GN=TG PE=1 SV=5	17152	20210911_zy_tissue_ethcd_1.5721.5721.3	controllerType=0 controllerNumber=1 scan=5721	25.8625
05062:3	1	R.HFDVAHVSTAATSN[+1216.423]FSAVR.D	HexNAc(2)Hex(5)	N[+1216]	1078.47	3	3233.4	3233.41	0	-3.8	2109	Specific	754.82	640.31	640.31	14.58	175	>sp|P01266|THYG_HUMAN Thyroglobulin OS=Homo sapiens OX=9606 GN=TG PE=1 SV=5	17152	20210911_zy_tissue_ethcd_1.5572.5572.3	controllerType=0 controllerNumber=1 scan=5572	25.2527
05470:4	1	R.HFDVAHVSTAATSN[+1864.634]FSAVR.D	HexNAc(2)Hex(9)	N[+1865]	971.159	4	3881.61	3881.62	0	-2.6	2109	Specific	756.57	637.27	637.27	14.6	175	>sp|P01266|THYG_HUMAN Thyroglobulin OS=Homo sapiens OX=9606 GN=TG PE=1 SV=5	17152	20210911_zy_tissue_ethcd_1.6020.6020.4	controllerType=0 controllerNumber=1 scan=6020	27.1641
05267:3	1	R.HFDVAHVSTAATSN[+730.264]FSAVR.D	HexNAc(2)Hex(2)	N[+730]	916.42	3	2747.25	2747.25	0	-2.5	2109	Specific	766.59	656.07	656.07	14.89	175	>sp|P01266|THYG_HUMAN Thyroglobulin OS=Homo sapiens OX=9606 GN=TG PE=1 SV=5	17152	20210911_zy_tissue_ethcd_1.5798.5798.3	controllerType=0 controllerNumber=1 scan=5798	26.1858
04991:3	1	R.HFDVAHVSTAATSN[+1054.370]FSAVR.D	HexNAc(2)Hex(4)	N[+1054]	1024.46	3	3071.35	3071.36	0	-1.2	2109	Specific	775.94	683.63	683.63	14.82	175	>sp|P01266|THYG_HUMAN Thyroglobulin OS=Homo sapiens OX=9606 GN=TG PE=1 SV=5	17152	20210911_zy_tissue_ethcd_1.5493.5493.3	controllerType=0 controllerNumber=1 scan=5493	24.9452
04441:4	1	R.HFDVAHVSTAATSN[+1378.476]FSAVR.D	HexNAc(2)Hex(6)	N[+1378]	849.62	4	3395.46	3395.46	0	-1.8	2109	Specific	788.51	672.33	672.33	14.61	175	>sp|P01266|THYG_HUMAN Thyroglobulin OS=Homo sapiens OX=9606 GN=TG PE=1 SV=5	17152	20210911_zy_tissue_ethcd_1.4891.4891.4	controllerType=0 controllerNumber=1 scan=4891	22.2653
04409:4	1	R.HFDVAHVSTAATSN[+1540.529]FSAVR.D	HexNAc(2)Hex(7)	N[+1541]	890.134	4	3557.51	3557.52	0	-1.2	2109	Specific	798.47	687.41	687.41	14.53	175	>sp|P01266|THYG_HUMAN Thyroglobulin OS=Homo sapiens OX=9606 GN=TG PE=1 SV=5	17152	20210911_zy_tissue_ethcd_1.4856.4856.4	controllerType=0 controllerNumber=1 scan=4856	22.1106
05188:3	1	R.HFDVAHVSTAATSN[+730.264]FSAVR.D	HexNAc(2)Hex(2)	N[+730]	916.421	3	2747.25	2747.25	0	-1.7	2109	Specific	814.9	707.8	707.8	15.9	175	>sp|P01266|THYG_HUMAN Thyroglobulin OS=Homo sapiens OX=9606 GN=TG PE=1 SV=5	17152	20210911_zy_tissue_ethcd_1.5712.5712.3	controllerType=0 controllerNumber=1 scan=5712	25.8272
05350:4	1	R.HFDVAHVSTAATSN[+1864.634]FSAVR.D	HexNAc(2)Hex(9)	N[+1865]	971.16	4	3881.62	3881.62	0	-1	2109	Specific	817.41	700.69	700.69	15.53	175	>sp|P01266|THYG_HUMAN Thyroglobulin OS=Homo sapiens OX=9606 GN=TG PE=1 SV=5	17152	20210911_zy_tissue_ethcd_1.5889.5889.3	controllerType=0 controllerNumber=1 scan=5889	26.5806
05241:3	1	R.HFDVAHVSTAATSN[+568.212]FSAVR.D	HexNAc(2)Hex(1)	N[+568]	862.403	3	2585.19	2585.2	0	-2.3	2109	Specific	824.28	733.8	733.8	15.89	175	>sp|P01266|THYG_HUMAN Thyroglobulin OS=Homo sapiens OX=9606 GN=TG PE=1 SV=5	17152	20210911_zy_tissue_ethcd_1.5770.5770.3	controllerType=0 controllerNumber=1 scan=5770	26.071
05353:3	1	R.HFDVAHVSTAATSN[+568.212]FSAVR.D	HexNAc(2)Hex(1)	N[+568]	862.403	3	2585.19	2585.2	0	-2.6	2109	Specific	836.22	713.38	713.38	15.89	175	>sp|P01266|THYG_HUMAN Thyroglobulin OS=Homo sapiens OX=9606 GN=TG PE=1 SV=5	17152	20210911_zy_tissue_ethcd_1.5892.5892.4	controllerType=0 controllerNumber=1 scan=5892	26.5943
05277:4	1	R.HFDVAHVSTAATSN[+1864.634]FSAVR.D	HexNAc(2)Hex(9)	N[+1865]	971.159	4	3881.62	3881.62	0	-2	2109	Specific	850.04	734.93	734.93	16.61	175	>sp|P01266|THYG_HUMAN Thyroglobulin OS=Homo sapiens OX=9606 GN=TG PE=1 SV=5	17152	20210911_zy_tissue_ethcd_1.5809.5809.3	controllerType=0 controllerNumber=1 scan=5809	26.2318
05146:3	1	R.HFDVAHVSTAATSN[+1540.529]FSAVR.D	HexNAc(2)Hex(7)	N[+1541]	1186.51	3	3557.51	3557.52	0	-1.7	2109	Specific	864.54	746.41	746.41	16.9	175	>sp|P01266|THYG_HUMAN Thyroglobulin OS=Homo sapiens OX=9606 GN=TG PE=1 SV=5	17152	20210911_zy_tissue_ethcd_1.5666.5666.2	controllerType=0 controllerNumber=1 scan=5666	25.6342
05114:3	1	R.HFDVAHVSTAATSN[+730.264]FSAVR.D	HexNAc(2)Hex(2)	N[+730]	916.421	3	2747.25	2747.25	0	-1.4	2109	Specific	869.28	717.04	717.04	16.9	175	>sp|P01266|THYG_HUMAN Thyroglobulin OS=Homo sapiens OX=9606 GN=TG PE=1 SV=5	17152	20210911_zy_tissue_ethcd_1.5631.5631.3	controllerType=0 controllerNumber=1 scan=5631	25.487
05086:3	1	R.HFDVAHVSTAATSN[+730.264]FSAVR.D	HexNAc(2)Hex(2)	N[+730]	916.421	3	2747.25	2747.25	0	-1.6	2109	Specific	871.57	742.8	742.8	16.9	175	>sp|P01266|THYG_HUMAN Thyroglobulin OS=Homo sapiens OX=9606 GN=TG PE=1 SV=5	17152	20210911_zy_tissue_ethcd_1.5599.5599.3	controllerType=0 controllerNumber=1 scan=5599	25.3576
04505:4	1	R.HFDVAHVSTAATSN[+1216.423]FSAVR.D	HexNAc(2)Hex(5)	N[+1216]	809.107	4	3233.41	3233.41	0	-1.5	2109	Specific	873.37	718.39	718.39	16.61	175	>sp|P01266|THYG_HUMAN Thyroglobulin OS=Homo sapiens OX=9606 GN=TG PE=1 SV=5	17152	20210911_zy_tissue_ethcd_1.4961.4961.4	controllerType=0 controllerNumber=1 scan=4961	22.5774
04559:4	1	R.HFDVAHVSTAATSN[+1216.423]FSAVR.D	HexNAc(2)Hex(5)	N[+1216]	809.107	4	3233.41	3233.41	0	-1.3	2109	Specific	883.15	787.28	787.28	16.53	175	>sp|P01266|THYG_HUMAN Thyroglobulin OS=Homo sapiens OX=9606 GN=TG PE=1 SV=5	17152	20210911_zy_tissue_ethcd_1.5020.5020.4	controllerType=0 controllerNumber=1 scan=5020	22.842
04648:4	1	R.HFDVAHVSTAATSN[+1216.423]FSAVR.D	HexNAc(2)Hex(5)	N[+1216]	809.107	4	3233.41	3233.41	0	-1.1	2109	Specific	887.79	760.7	760.7	16.53	175	>sp|P01266|THYG_HUMAN Thyroglobulin OS=Homo sapiens OX=9606 GN=TG PE=1 SV=5	17152	20210911_zy_tissue_ethcd_1.5117.5117.4	controllerType=0 controllerNumber=1 scan=5117	23.2834
05136:3	1	R.HFDVAHVSTAATSN[+568.212]FSAVR.D	HexNAc(2)Hex(1)	N[+568]	862.404	3	2585.2	2585.2	0	-0.7	2109	Specific	889.02	812.07	812.07	16.6	175	>sp|P01266|THYG_HUMAN Thyroglobulin OS=Homo sapiens OX=9606 GN=TG PE=1 SV=5	17152	20210911_zy_tissue_ethcd_1.5655.5655.3	controllerType=0 controllerNumber=1 scan=5655	25.5865
05041:3	1	R.HFDVAHVSTAATSN[+568.212]FSAVR.D	HexNAc(2)Hex(1)	N[+568]	862.403	3	2585.2	2585.2	0	-1.8	2109	Specific	889.37	816.17	816.17	16.9	175	>sp|P01266|THYG_HUMAN Thyroglobulin OS=Homo sapiens OX=9606 GN=TG PE=1 SV=5	17152	20210911_zy_tissue_ethcd_1.5548.5548.3	controllerType=0 controllerNumber=1 scan=5548	25.1607
04415:4	1	R.HFDVAHVSTAATSN[+1864.634]FSAVR.D	HexNAc(2)Hex(9)	N[+1865]	971.159	4	3881.61	3881.62	0	-2.6	2109	Specific	894.29	757.73	757.73	16.6	175	>sp|P01266|THYG_HUMAN Thyroglobulin OS=Homo sapiens OX=9606 GN=TG PE=1 SV=5	17152	20210911_zy_tissue_ethcd_1.4862.4862.5	controllerType=0 controllerNumber=1 scan=4862	22.1381
04530:4	1	R.HFDVAHVSTAATSN[+1216.423]FSAVR.D	HexNAc(2)Hex(5)	N[+1216]	809.107	4	3233.41	3233.41	0	-2	2109	Specific	902.31	753.59	753.59	17.61	175	>sp|P01266|THYG_HUMAN Thyroglobulin OS=Homo sapiens OX=9606 GN=TG PE=1 SV=5	17152	20210911_zy_tissue_ethcd_1.4988.4988.4	controllerType=0 controllerNumber=1 scan=4988	22.6987
05132:3	1	R.HFDVAHVSTAATSN[+568.212]FSAVR.D	HexNAc(2)Hex(1)	N[+568]	862.402	3	2585.19	2585.2	0	-2.9	2109	Specific	912.57	835.32	835.32	17.73	175	>sp|P01266|THYG_HUMAN Thyroglobulin OS=Homo sapiens OX=9606 GN=TG PE=1 SV=5	17152	20210911_zy_tissue_ethcd_1.5650.5650.3	controllerType=0 controllerNumber=1 scan=5650	25.5683
05175:4	1	R.HFDVAHVSTAATSN[+1864.634]FSAVR.D	HexNAc(2)Hex(9)	N[+1865]	971.159	4	3881.61	3881.62	0	-2.4	2109	Specific	922.24	797.89	797.89	17.6	175	>sp|P01266|THYG_HUMAN Thyroglobulin OS=Homo sapiens OX=9606 GN=TG PE=1 SV=5	17152	20210911_zy_tissue_ethcd_1.5698.5698.3	controllerType=0 controllerNumber=1 scan=5698	25.7682
05099:4	1	R.HFDVAHVSTAATSN[+1864.634]FSAVR.D	HexNAc(2)Hex(9)	N[+1865]	971.159	4	3881.61	3881.62	0	-2.7	2109	Specific	930.9	807.83	807.83	17.43	175	>sp|P01266|THYG_HUMAN Thyroglobulin OS=Homo sapiens OX=9606 GN=TG PE=1 SV=5	17152	20210911_zy_tissue_ethcd_1.5614.5614.3	controllerType=0 controllerNumber=1 scan=5614	25.4196
05341:4	1	R.HFDVAHVSTAATSN[+1216.423]FSAVR.D	HexNAc(2)Hex(5)	N[+1216]	809.107	4	3233.41	3233.41	0	-1.5	2109	Specific	933.51	822.15	822.15	17.61	175	>sp|P01266|THYG_HUMAN Thyroglobulin OS=Homo sapiens OX=9606 GN=TG PE=1 SV=5	17152	20210911_zy_tissue_ethcd_1.5879.5879.3	controllerType=0 controllerNumber=1 scan=5879	26.5364
05189:4	1	R.HFDVAHVSTAATSN[+1216.423]FSAVR.D	HexNAc(2)Hex(5)	N[+1216]	809.106	4	3233.4	3233.41	0	-2.6	2109	Specific	958.62	846.66	846.66	18.6	175	>sp|P01266|THYG_HUMAN Thyroglobulin OS=Homo sapiens OX=9606 GN=TG PE=1 SV=5	17152	20210911_zy_tissue_ethcd_1.5713.5713.3	controllerType=0 controllerNumber=1 scan=5713	25.8318
05253:4	1	R.HFDVAHVSTAATSN[+1216.423]FSAVR.D	HexNAc(2)Hex(5)	N[+1216]	809.107	4	3233.41	3233.41	0	-1.2	2109	Specific	966.73	842.89	842.89	18.53	175	>sp|P01266|THYG_HUMAN Thyroglobulin OS=Homo sapiens OX=9606 GN=TG PE=1 SV=5	17152	20210911_zy_tissue_ethcd_1.5783.5783.3	controllerType=0 controllerNumber=1 scan=5783	26.1245
05242:4	1	R.HFDVAHVSTAATSN[+1216.423]FSAVR.D	HexNAc(2)Hex(5)	N[+1216]	809.107	4	3233.41	3233.41	0	-2	2109	Specific	967.49	836.93	836.93	18.61	175	>sp|P01266|THYG_HUMAN Thyroglobulin OS=Homo sapiens OX=9606 GN=TG PE=1 SV=5	17152	20210911_zy_tissue_ethcd_1.5771.5771.3	controllerType=0 controllerNumber=1 scan=5771	26.0756
05135:4	1	R.HFDVAHVSTAATSN[+1216.423]FSAVR.D	HexNAc(2)Hex(5)	N[+1216]	809.108	4	3233.41	3233.41	0	-0.5	2109	Specific	980.04	910.15	910.15	18.3	175	>sp|P01266|THYG_HUMAN Thyroglobulin OS=Homo sapiens OX=9606 GN=TG PE=1 SV=5	17152	20210911_zy_tissue_ethcd_1.5654.5654.3	controllerType=0 controllerNumber=1 scan=5654	25.5821
05297:4	1	R.HFDVAHVSTAATSN[+1216.423]FSAVR.D	HexNAc(2)Hex(5)	N[+1216]	809.107	4	3233.41	3233.41	0	-1.8	2109	Specific	983.09	868.13	868.13	18.61	175	>sp|P01266|THYG_HUMAN Thyroglobulin OS=Homo sapiens OX=9606 GN=TG PE=1 SV=5	17152	20210911_zy_tissue_ethcd_1.5831.5831.3	controllerType=0 controllerNumber=1 scan=5831	26.3328
05069:4	1	R.HFDVAHVSTAATSN[+1216.423]FSAVR.D	HexNAc(2)Hex(5)	N[+1216]	809.107	4	3233.4	3233.41	0	-2.1	2109	Specific	986.79	817.32	817.32	18.6	175	>sp|P01266|THYG_HUMAN Thyroglobulin OS=Homo sapiens OX=9606 GN=TG PE=1 SV=5	17152	20210911_zy_tissue_ethcd_1.5580.5580.2	controllerType=0 controllerNumber=1 scan=5580	25.2848
05163:4	1	R.HFDVAHVSTAATSN[+1864.634]FSAVR.D	HexNAc(2)Hex(9)	N[+1865]	971.159	4	3881.61	3881.62	0	-2	2109	Specific	987.94	837.98	837.98	18.6	175	>sp|P01266|THYG_HUMAN Thyroglobulin OS=Homo sapiens OX=9606 GN=TG PE=1 SV=5	17152	20210911_zy_tissue_ethcd_1.5685.5685.4	controllerType=0 controllerNumber=1 scan=5685	25.715
05233:4	1	R.HFDVAHVSTAATSN[+1216.423]FSAVR.D	HexNAc(2)Hex(5)	N[+1216]	809.107	4	3233.41	3233.41	0	-1.8	2109	Specific	988.72	876.57	876.57	18.61	175	>sp|P01266|THYG_HUMAN Thyroglobulin OS=Homo sapiens OX=9606 GN=TG PE=1 SV=5	17152	20210911_zy_tissue_ethcd_1.5761.5761.3	controllerType=0 controllerNumber=1 scan=5761	26.0349
05420:4	1	R.HFDVAHVSTAATSN[+1216.423]FSAVR.D	HexNAc(2)Hex(5)	N[+1216]	809.106	4	3233.4	3233.41	0	-2.5	2109	Specific	990.29	862.15	862.15	18.6	175	>sp|P01266|THYG_HUMAN Thyroglobulin OS=Homo sapiens OX=9606 GN=TG PE=1 SV=5	17152	20210911_zy_tissue_ethcd_1.5965.5965.3	controllerType=0 controllerNumber=1 scan=5965	26.921
05276:4	1	R.HFDVAHVSTAATSN[+1216.423]FSAVR.D	HexNAc(2)Hex(5)	N[+1216]	809.107	4	3233.41	3233.41	0	-1.8	2109	Specific	1006.15	872.33	872.33	19.61	175	>sp|P01266|THYG_HUMAN Thyroglobulin OS=Homo sapiens OX=9606 GN=TG PE=1 SV=5	17152	20210911_zy_tissue_ethcd_1.5808.5808.3	controllerType=0 controllerNumber=1 scan=5808	26.2286
05161:4	1	R.HFDVAHVSTAATSN[+1216.423]FSAVR.D	HexNAc(2)Hex(5)	N[+1216]	809.107	4	3233.4	3233.41	0	-2.1	2109	Specific	1006.6	890.29	890.29	19.6	175	>sp|P01266|THYG_HUMAN Thyroglobulin OS=Homo sapiens OX=9606 GN=TG PE=1 SV=5	17152	20210911_zy_tissue_ethcd_1.5682.5682.3	controllerType=0 controllerNumber=1 scan=5682	25.7075
04552:4	1	R.HFDVAHVSTAATSN[+1864.634]FSAVR.D	HexNAc(2)Hex(9)	N[+1865]	971.159	4	3881.62	3881.62	0	-1.9	2109	Specific	1017.71	828.35	828.35	19.61	175	>sp|P01266|THYG_HUMAN Thyroglobulin OS=Homo sapiens OX=9606 GN=TG PE=1 SV=5	17152	20210911_zy_tissue_ethcd_1.5012.5012.4	controllerType=0 controllerNumber=1 scan=5012	22.8063
05168:4	1	R.HFDVAHVSTAATSN[+1216.423]FSAVR.D	HexNAc(2)Hex(5)	N[+1216]	809.107	4	3233.4	3233.41	0	-2.1	2109	Specific	1045.04	933.75	933.75	19.6	175	>sp|P01266|THYG_HUMAN Thyroglobulin OS=Homo sapiens OX=9606 GN=TG PE=1 SV=5	17152	20210911_zy_tissue_ethcd_1.5690.5690.3	controllerType=0 controllerNumber=1 scan=5690	25.7349
05124:4	1	R.HFDVAHVSTAATSN[+1216.423]FSAVR.D	HexNAc(2)Hex(5)	N[+1216]	809.106	4	3233.4	3233.41	0	-2.8	2109	Specific	1053.68	894.87	894.87	20.43	175	>sp|P01266|THYG_HUMAN Thyroglobulin OS=Homo sapiens OX=9606 GN=TG PE=1 SV=5	17152	20210911_zy_tissue_ethcd_1.5642.5642.4	controllerType=0 controllerNumber=1 scan=5642	25.5339
06154:4	1	R.HFDVAHVSTAATSN[+1216.423]FSAVR.D	HexNAc(2)Hex(5)	N[+1216]	809.107	4	3233.41	3233.41	0	-1.5	2109	Specific	1100.04	958.04	958.04	21.61	175	>sp|P01266|THYG_HUMAN Thyroglobulin OS=Homo sapiens OX=9606 GN=TG PE=1 SV=5	17152	20210911_zy_tissue_ethcd_1.6771.6771.4	controllerType=0 controllerNumber=1 scan=6771	30.5721
04990:4	1	R.HFDVAHVSTAATSN[+1864.634]FSAVR.D	HexNAc(2)Hex(9)	N[+1865]	971.16	4	3881.62	3881.62	0	-1.5	2109	Specific	1102.77	919.08	919.08	21.61	175	>sp|P01266|THYG_HUMAN Thyroglobulin OS=Homo sapiens OX=9606 GN=TG PE=1 SV=5	17152	20210911_zy_tissue_ethcd_1.5492.5492.3	controllerType=0 controllerNumber=1 scan=5492	24.943
04988:4	1	R.HFDVAHVSTAATSN[+2026.687]FSAVR.D	HexNAc(2)Hex(10)	N[+2027]	1011.67	4	4043.67	4043.68	0	-1.4	2109	Specific	1110.6	955.6	955.6	21.53	175	>sp|P01266|THYG_HUMAN Thyroglobulin OS=Homo sapiens OX=9606 GN=TG PE=1 SV=5	17152	20210911_zy_tissue_ethcd_1.5490.5490.4	controllerType=0 controllerNumber=1 scan=5490	24.9359
05025:4	1	R.HFDVAHVSTAATSN[+2026.687]FSAVR.D	HexNAc(2)Hex(10)	N[+2027]	1011.67	4	4043.67	4043.68	0	-1.9	2109	Specific	1113.03	953.66	953.66	21.61	175	>sp|P01266|THYG_HUMAN Thyroglobulin OS=Homo sapiens OX=9606 GN=TG PE=1 SV=5	17152	20210911_zy_tissue_ethcd_1.5531.5531.4	controllerType=0 controllerNumber=1 scan=5531	25.0891
05195:4	1	R.HFDVAHVSTAATSN[+1702.581]FSAVR.D	HexNAc(2)Hex(8)	N[+1703]	930.646	4	3719.56	3719.57	0	-2.1	2109	Specific	1150.03	988.81	988.81	22.6	175	>sp|P01266|THYG_HUMAN Thyroglobulin OS=Homo sapiens OX=9606 GN=TG PE=1 SV=5	17152	20210911_zy_tissue_ethcd_1.5720.5720.4	controllerType=0 controllerNumber=1 scan=5720	25.8601
05045:4	1	R.HFDVAHVSTAATSN[+1864.634]FSAVR.D	HexNAc(2)Hex(9)	N[+1865]	971.159	4	3881.61	3881.62	0	-2.2	2109	Specific	1228.43	1079.26	1079.26	23.6	175	>sp|P01266|THYG_HUMAN Thyroglobulin OS=Homo sapiens OX=9606 GN=TG PE=1 SV=5	17152	20210911_zy_tissue_ethcd_1.5553.5553.3	controllerType=0 controllerNumber=1 scan=5553	25.1794
11840:3	1	R.RFQAPEPLN[+2075.730]WTGSWDASK.P	HexNAc(4)Hex(6)NeuAc(1)	N[+2076]	1389.25	3	4165.73	4165.74	0	-2.4	2242	Specific	212.24	89.1	89.1	5.1	175	>sp|P01266|THYG_HUMAN Thyroglobulin OS=Homo sapiens OX=9606 GN=TG PE=1 SV=5	17152	20210911_zy_tissue_ethcd_1.13010.13010.3	controllerType=0 controllerNumber=1 scan=13010	58.6643
12054:3	1	R.RFQAPEPLN[+2075.730]WTGSWDASK.P	HexNAc(4)Hex(6)NeuAc(1)	N[+2076]	1388.91	3	4164.73	4165.74	-1	-2.2	2242	Specific	214.41	89.3	89.3	4.96	175	>sp|P01266|THYG_HUMAN Thyroglobulin OS=Homo sapiens OX=9606 GN=TG PE=1 SV=5	17152	20210911_zy_tissue_ethcd_1.13245.13245.3	controllerType=0 controllerNumber=1 scan=13245	59.7253
10284:3	1	R.RFQAPEPLN[+2075.730]WTGSWDASK.P	HexNAc(4)Hex(6)NeuAc(1)	N[+2076]	1388.91	3	4164.72	4165.74	-1	-3.6	2242	Specific	218.77	10.79	10.79	2.31	175	>sp|P01266|THYG_HUMAN Thyroglobulin OS=Homo sapiens OX=9606 GN=TG PE=1 SV=5	17152	20210911_zy_tissue_ethcd_1.11304.11304.3	controllerType=0 controllerNumber=1 scan=11304	51.0072
12976:3	1	R.RFQAPEPLN[+2075.730]WTGSWDASK.P	HexNAc(4)Hex(6)NeuAc(1)	N[+2076]	1389.25	3	4165.74	4165.74	0	0.3	2242	Specific	219.97	127.46	127.46	4.62	175	>sp|P01266|THYG_HUMAN Thyroglobulin OS=Homo sapiens OX=9606 GN=TG PE=1 SV=5	17152	20210911_zy_tissue_ethcd_1.14256.14256.3	controllerType=0 controllerNumber=1 scan=14256	64.2674
10859:3	1	R.RFQAPEPLN[+2116.756]WTGSWDASK.P	HexNAc(5)Hex(5)NeuAc(1)	N[+2117]	1402.93	3	4206.77	4206.77	0	0.8	2242	Specific	220.08	138.04	138.04	4.24	175	>sp|P01266|THYG_HUMAN Thyroglobulin OS=Homo sapiens OX=9606 GN=TG PE=1 SV=5	17152	20210911_zy_tissue_ethcd_1.11934.11934.3	controllerType=0 controllerNumber=1 scan=11934	53.8383
09859:3	1	R.RFQAPEPLN[+2075.730]WTGSWDASK.P	HexNAc(4)Hex(6)NeuAc(1)	N[+2076]	1389.25	3	4165.73	4165.74	0	-2.4	2242	Specific	226.57	62.79	62.79	6.1	175	>sp|P01266|THYG_HUMAN Thyroglobulin OS=Homo sapiens OX=9606 GN=TG PE=1 SV=5	17152	20210911_zy_tissue_ethcd_1.10838.10838.3	controllerType=0 controllerNumber=1 scan=10838	48.9164
12720:3	1	R.RFQAPEPLN[+2424.867]WTGSWDASK.P	HexNAc(5)Hex(6)Fuc(1)NeuAc(1)	N[+2425]	1505.63	3	4514.87	4514.88	0	-2.3	2242	Specific	239.34	143.49	143.49	6.72	175	>sp|P01266|THYG_HUMAN Thyroglobulin OS=Homo sapiens OX=9606 GN=TG PE=1 SV=5	17152	20210911_zy_tissue_ethcd_1.13975.13975.3	controllerType=0 controllerNumber=1 scan=13975	63.0047
10784:3	1	R.RFQAPEPLN[+1913.677]WTGSWDASK.P	HexNAc(4)Hex(5)NeuAc(1)	N[+1914]	1335.24	3	4003.69	4003.69	0	2	2242	Specific	245.26	153.89	153.89	5.29	175	>sp|P01266|THYG_HUMAN Thyroglobulin OS=Homo sapiens OX=9606 GN=TG PE=1 SV=5	17152	20210911_zy_tissue_ethcd_1.11852.11852.3	controllerType=0 controllerNumber=1 scan=11852	53.4725
12909:3	1	R.RFQAPEPLN[+2204.772]WTGSWDASK.P	HexNAc(4)Hex(5)NeuAc(2)	N[+2205]	1432.6	3	4295.8	4294.78	1	2.4	2242	Specific	246.15	158.75	158.75	5.55	175	>sp|P01266|THYG_HUMAN Thyroglobulin OS=Homo sapiens OX=9606 GN=TG PE=1 SV=5	17152	20210911_zy_tissue_ethcd_1.14182.14182.3	controllerType=0 controllerNumber=1 scan=14182	63.9345
15133:3	1	R.RFQAPEPLN[+2059.735]WTGSWDASK.P	HexNAc(4)Hex(5)Fuc(1)NeuAc(1)	N[+2060]	1383.92	3	4149.74	4149.74	0	-1.2	2242	Specific	249.66	123.9	123.9	6.63	175	>sp|P01266|THYG_HUMAN Thyroglobulin OS=Homo sapiens OX=9606 GN=TG PE=1 SV=5	17152	20210911_zy_tissue_ethcd_1.16620.16620.3	controllerType=0 controllerNumber=1 scan=16620	74.7766
11992:3	1	R.RFQAPEPLN[+2075.730]WTGSWDASK.P	HexNAc(4)Hex(6)NeuAc(1)	N[+2076]	1389.25	3	4165.73	4165.74	0	-1.8	2242	Specific	257.53	97.42	97.42	6.63	175	>sp|P01266|THYG_HUMAN Thyroglobulin OS=Homo sapiens OX=9606 GN=TG PE=1 SV=5	17152	20210911_zy_tissue_ethcd_1.13177.13177.3	controllerType=0 controllerNumber=1 scan=13177	59.418
11414:3	1	R.RFQAPEPLN[+2075.730]WTGSWDASK.P	HexNAc(4)Hex(6)NeuAc(1)	N[+2076]	1389.25	3	4165.74	4165.74	0	-0.3	2242	Specific	267	128.08	128.08	6.48	175	>sp|P01266|THYG_HUMAN Thyroglobulin OS=Homo sapiens OX=9606 GN=TG PE=1 SV=5	17152	20210911_zy_tissue_ethcd_1.12543.12543.3	controllerType=0 controllerNumber=1 scan=12543	56.5773
12936:3	1	R.RFQAPEPLN[+2221.788]WTGSWDASK.P	HexNAc(4)Hex(6)Fuc(1)NeuAc(1)	N[+2222]	1437.93	3	4311.79	4311.8	0	-1.6	2242	Specific	279.61	181.87	181.87	6.68	175	>sp|P01266|THYG_HUMAN Thyroglobulin OS=Homo sapiens OX=9606 GN=TG PE=1 SV=5	17152	20210911_zy_tissue_ethcd_1.14212.14212.3	controllerType=0 controllerNumber=1 scan=14212	64.0665
12905:3	1	R.RFQAPEPLN[+2424.867]WTGSWDASK.P	HexNAc(5)Hex(6)Fuc(1)NeuAc(1)	N[+2425]	1505.63	3	4514.87	4514.88	0	-0.7	2242	Specific	282.06	177.06	177.06	6.38	175	>sp|P01266|THYG_HUMAN Thyroglobulin OS=Homo sapiens OX=9606 GN=TG PE=1 SV=5	17152	20210911_zy_tissue_ethcd_1.14178.14178.3	controllerType=0 controllerNumber=1 scan=14178	63.9157
10929:3	1	R.RFQAPEPLN[+1971.719]WTGSWDASK.P	HexNAc(5)Hex(5)Fuc(1)	N[+1972]	1354.58	3	4061.73	4061.73	0	-0.7	2242	Specific	289.65	202.28	202.28	6.53	175	>sp|P01266|THYG_HUMAN Thyroglobulin OS=Homo sapiens OX=9606 GN=TG PE=1 SV=5	17152	20210911_zy_tissue_ethcd_1.12011.12011.3	controllerType=0 controllerNumber=1 scan=12011	54.1811
11769:3	1	R.RFQAPEPLN[+2092.745]WTGSWDASK.P	HexNAc(4)Hex(7)Fuc(1)	N[+2093]	1394.58	3	4181.73	4182.75	-1	-5	2242	Specific	301.56	201.85	201.85	5.95	175	>sp|P01266|THYG_HUMAN Thyroglobulin OS=Homo sapiens OX=9606 GN=TG PE=1 SV=5	17152	20210911_zy_tissue_ethcd_1.12932.12932.3	controllerType=0 controllerNumber=1 scan=12932	58.3127
10846:3	1	R.RFQAPEPLN[+1913.677]WTGSWDASK.P	HexNAc(4)Hex(5)NeuAc(1)	N[+1914]	1335.57	3	4004.7	4003.69	1	2.6	2242	Specific	326.36	162.6	162.6	5.34	175	>sp|P01266|THYG_HUMAN Thyroglobulin OS=Homo sapiens OX=9606 GN=TG PE=1 SV=5	17152	20210911_zy_tissue_ethcd_1.11920.11920.3	controllerType=0 controllerNumber=1 scan=11920	53.7753
10221:3	1	R.RFQAPEPLN[+2075.730]WTGSWDASK.P	HexNAc(4)Hex(6)NeuAc(1)	N[+2076]	1389.25	3	4165.73	4165.74	0	-1.4	2242	Specific	334.08	179.56	179.56	6.73	175	>sp|P01266|THYG_HUMAN Thyroglobulin OS=Homo sapiens OX=9606 GN=TG PE=1 SV=5	17152	20210911_zy_tissue_ethcd_1.11235.11235.3	controllerType=0 controllerNumber=1 scan=11235	50.6981
09900:3	1	R.RFQAPEPLN[+2075.730]WTGSWDASK.P	HexNAc(4)Hex(6)NeuAc(1)	N[+2076]	1388.91	3	4164.72	4165.74	-1	-3.9	2242	Specific	335.22	169.31	169.31	5.98	175	>sp|P01266|THYG_HUMAN Thyroglobulin OS=Homo sapiens OX=9606 GN=TG PE=1 SV=5	17152	20210911_zy_tissue_ethcd_1.10883.10883.3	controllerType=0 controllerNumber=1 scan=10883	49.1193
12901:3	1	R.RFQAPEPLN[+2059.735]WTGSWDASK.P	HexNAc(4)Hex(5)Fuc(1)NeuAc(1)	N[+2060]	1383.92	3	4149.73	4149.74	0	-2.2	2242	Specific	339.6	218.91	218.91	6.76	175	>sp|P01266|THYG_HUMAN Thyroglobulin OS=Homo sapiens OX=9606 GN=TG PE=1 SV=5	17152	20210911_zy_tissue_ethcd_1.14173.14173.3	controllerType=0 controllerNumber=1 scan=14173	63.8959
11258:3	1	R.RFQAPEPLN[+2059.735]WTGSWDASK.P	HexNAc(4)Hex(5)Fuc(1)NeuAc(1)	N[+2060]	1383.92	3	4149.74	4149.74	0	-1.8	2242	Specific	348.09	227.16	227.16	6.83	175	>sp|P01266|THYG_HUMAN Thyroglobulin OS=Homo sapiens OX=9606 GN=TG PE=1 SV=5	17152	20210911_zy_tissue_ethcd_1.12372.12372.3	controllerType=0 controllerNumber=1 scan=12372	55.8088
10832:3	1	R.RFQAPEPLN[+1913.677]WTGSWDASK.P	HexNAc(4)Hex(5)NeuAc(1)	N[+1914]	1334.9	3	4002.68	4003.69	-1	-0.4	2242	Specific	372.08	189.8	189.8	6.36	175	>sp|P01266|THYG_HUMAN Thyroglobulin OS=Homo sapiens OX=9606 GN=TG PE=1 SV=5	17152	20210911_zy_tissue_ethcd_1.11904.11904.3	controllerType=0 controllerNumber=1 scan=11904	53.7054
13081:3	1	R.RFQAPEPLN[+2059.735]WTGSWDASK.P	HexNAc(4)Hex(5)Fuc(1)NeuAc(1)	N[+2060]	1383.58	3	4148.73	4149.74	-1	-2	2242	Specific	401.42	251.01	251.01	6.79	175	>sp|P01266|THYG_HUMAN Thyroglobulin OS=Homo sapiens OX=9606 GN=TG PE=1 SV=5	17152	20210911_zy_tissue_ethcd_1.14372.14372.3	controllerType=0 controllerNumber=1 scan=14372	64.7893
12947:3	1	R.RFQAPEPLN[+2204.772]WTGSWDASK.P	HexNAc(4)Hex(5)NeuAc(2)	N[+2205]	1432.61	3	4295.8	4294.78	1	4	2242	Specific	419.43	316.36	316.36	5.82	175	>sp|P01266|THYG_HUMAN Thyroglobulin OS=Homo sapiens OX=9606 GN=TG PE=1 SV=5	17152	20210911_zy_tissue_ethcd_1.14224.14224.3	controllerType=0 controllerNumber=1 scan=14224	64.1246
10814:3	1	R.RFQAPEPLN[+1768.640]WTGSWDASK.P	HexNAc(4)Hex(5)Fuc(1)	N[+1769]	1286.89	3	3858.64	3858.65	0	-1	2242	Specific	443.31	342.63	342.63	7.23	175	>sp|P01266|THYG_HUMAN Thyroglobulin OS=Homo sapiens OX=9606 GN=TG PE=1 SV=5	17152	20210911_zy_tissue_ethcd_1.11885.11885.3	controllerType=0 controllerNumber=1 scan=11885	53.6188
13972:3	1	R.RFQAPEPLN[+2553.910]WTGSWDASK.P	HexNAc(5)Hex(5)Fuc(1)NeuAc(2)	N[+2554]	1548.64	3	4643.91	4643.92	0	-0.9	2242	Specific	455.94	343.43	343.43	7.25	175	>sp|P01266|THYG_HUMAN Thyroglobulin OS=Homo sapiens OX=9606 GN=TG PE=1 SV=5	17152	20210911_zy_tissue_ethcd_1.15347.15347.3	controllerType=0 controllerNumber=1 scan=15347	69.1012
13881:3	1	R.RFQAPEPLN[+2350.830]WTGSWDASK.P	HexNAc(4)Hex(5)Fuc(1)NeuAc(2)	N[+2351]	1480.95	3	4440.83	4440.84	0	-1.9	2242	Specific	493.97	384.42	384.42	8.44	175	>sp|P01266|THYG_HUMAN Thyroglobulin OS=Homo sapiens OX=9606 GN=TG PE=1 SV=5	17152	20210911_zy_tissue_ethcd_1.15247.15247.3	controllerType=0 controllerNumber=1 scan=15247	68.6596
13914:3	1	R.RFQAPEPLN[+2350.830]WTGSWDASK.P	HexNAc(4)Hex(5)Fuc(1)NeuAc(2)	N[+2351]	1480.95	3	4440.84	4440.84	0	-0.7	2242	Specific	502.2	404.24	404.24	8.14	175	>sp|P01266|THYG_HUMAN Thyroglobulin OS=Homo sapiens OX=9606 GN=TG PE=1 SV=5	17152	20210911_zy_tissue_ethcd_1.15283.15283.3	controllerType=0 controllerNumber=1 scan=15283	68.8203
10867:3	1	R.RFQAPEPLN[+1971.719]WTGSWDASK.P	HexNAc(5)Hex(5)Fuc(1)	N[+1972]	1354.58	3	4061.72	4061.73	0	-0.9	2242	Specific	508.18	407.88	407.88	8.36	175	>sp|P01266|THYG_HUMAN Thyroglobulin OS=Homo sapiens OX=9606 GN=TG PE=1 SV=5	17152	20210911_zy_tissue_ethcd_1.11943.11943.3	controllerType=0 controllerNumber=1 scan=11943	53.8765
13071:3	1	R.RFQAPEPLN[+2262.814]WTGSWDASK.P	HexNAc(5)Hex(5)Fuc(1)NeuAc(1)	N[+2263]	1451.61	3	4352.82	4352.82	0	-1.7	2242	Specific	526.97	403.73	403.73	8.63	175	>sp|P01266|THYG_HUMAN Thyroglobulin OS=Homo sapiens OX=9606 GN=TG PE=1 SV=5	17152	20210911_zy_tissue_ethcd_1.14361.14361.3	controllerType=0 controllerNumber=1 scan=14361	64.7381
13020:3	1	R.RFQAPEPLN[+2059.735]WTGSWDASK.P	HexNAc(4)Hex(5)Fuc(1)NeuAc(1)	N[+2060]	1383.92	3	4149.74	4149.74	0	-1	2242	Specific	547.21	352.28	352.28	7.52	175	>sp|P01266|THYG_HUMAN Thyroglobulin OS=Homo sapiens OX=9606 GN=TG PE=1 SV=5	17152	20210911_zy_tissue_ethcd_1.14305.14305.3	controllerType=0 controllerNumber=1 scan=14305	64.4846
12949:3	1	R.RFQAPEPLN[+2262.814]WTGSWDASK.P	HexNAc(5)Hex(5)Fuc(1)NeuAc(1)	N[+2263]	1451.61	3	4352.82	4352.82	0	0.2	2242	Specific	549.69	374.61	374.61	7.1	175	>sp|P01266|THYG_HUMAN Thyroglobulin OS=Homo sapiens OX=9606 GN=TG PE=1 SV=5	17152	20210911_zy_tissue_ethcd_1.14226.14226.3	controllerType=0 controllerNumber=1 scan=14226	64.1338
10887:3	1	R.RFQAPEPLN[+1768.640]WTGSWDASK.P	HexNAc(4)Hex(5)Fuc(1)	N[+1769]	1286.89	3	3858.64	3858.65	0	-0.9	2242	Specific	568.94	431.36	431.36	8.73	175	>sp|P01266|THYG_HUMAN Thyroglobulin OS=Homo sapiens OX=9606 GN=TG PE=1 SV=5	17152	20210911_zy_tissue_ethcd_1.11965.11965.3	controllerType=0 controllerNumber=1 scan=11965	53.975
12946:3	1	R.RFQAPEPLN[+2059.735]WTGSWDASK.P	HexNAc(4)Hex(5)Fuc(1)NeuAc(1)	N[+2060]	1383.92	3	4149.74	4149.74	0	-0.4	2242	Specific	590.77	384.95	384.95	9.53	175	>sp|P01266|THYG_HUMAN Thyroglobulin OS=Homo sapiens OX=9606 GN=TG PE=1 SV=5	17152	20210911_zy_tissue_ethcd_1.14223.14223.3	controllerType=0 controllerNumber=1 scan=14223	64.1173
10856:3	1	R.RFQAPEPLN[+2116.756]WTGSWDASKPR.A	HexNAc(5)Hex(5)NeuAc(1)	N[+2117]	1487.31	3	4459.92	4459.92	0	-0.4	2242	Specific	214.03	124.79	124.79	5.95	175	>sp|P01266|THYG_HUMAN Thyroglobulin OS=Homo sapiens OX=9606 GN=TG PE=1 SV=5	17152	20210911_zy_tissue_ethcd_1.11931.11931.3	controllerType=0 controllerNumber=1 scan=11931	53.8241
12983:3	1	R.RFQAPEPLN[+2350.830]WTGSWDASKPR.A	HexNAc(4)Hex(5)Fuc(1)NeuAc(2)	N[+2351]	1565.34	3	4693.99	4693.99	0	-0.4	2242	Specific	306.39	188.58	188.58	7.49	175	>sp|P01266|THYG_HUMAN Thyroglobulin OS=Homo sapiens OX=9606 GN=TG PE=1 SV=5	17152	20210911_zy_tissue_ethcd_1.14264.14264.3	controllerType=0 controllerNumber=1 scan=14264	64.3015
10981:3	1	R.RFQAPEPLN[+2059.735]WTGSWDASKPR.A	HexNAc(4)Hex(5)Fuc(1)NeuAc(1)	N[+2060]	1468.3	3	4402.89	4402.9	0	-0.7	2242	Specific	494.46	273.61	273.61	7.82	175	>sp|P01266|THYG_HUMAN Thyroglobulin OS=Homo sapiens OX=9606 GN=TG PE=1 SV=5	17152	20210911_zy_tissue_ethcd_1.12068.12068.3	controllerType=0 controllerNumber=1 scan=12068	54.4342
14080:3	1	R.FQAPEPLN[+2204.772]WTGSWDASK.P	HexNAc(4)Hex(5)NeuAc(2)	N[+2205]	1380.24	3	4138.7	4138.68	0	5.1	2243	Specific	239.03	128.31	128.31	5.51	175	>sp|P01266|THYG_HUMAN Thyroglobulin OS=Homo sapiens OX=9606 GN=TG PE=1 SV=5	17152	20210911_zy_tissue_ethcd_1.15465.15465.3	controllerType=0 controllerNumber=1 scan=15465	69.6183
13631:3	1	R.FQAPEPLN[+2092.745]WTGSWDASK.P	HexNAc(4)Hex(7)Fuc(1)	N[+2093]	1342.55	3	4025.63	4026.65	-1	-5.1	2243	Specific	271.27	131.73	131.73	5.48	175	>sp|P01266|THYG_HUMAN Thyroglobulin OS=Homo sapiens OX=9606 GN=TG PE=1 SV=5	17152	20210911_zy_tissue_ethcd_1.14974.14974.3	controllerType=0 controllerNumber=1 scan=14974	67.454
12975:3	1	R.FQAPEPLN[+2075.730]WTGSWDASK.P	HexNAc(4)Hex(6)NeuAc(1)	N[+2076]	1336.88	3	4008.62	4009.64	-1	-3.6	2243	Specific	275.66	99.74	99.74	5.92	175	>sp|P01266|THYG_HUMAN Thyroglobulin OS=Homo sapiens OX=9606 GN=TG PE=1 SV=5	17152	20210911_zy_tissue_ethcd_1.14255.14255.3	controllerType=0 controllerNumber=1 scan=14255	64.2623
13304:3	1	R.FQAPEPLN[+1768.640]WTGSWDASK.P	HexNAc(4)Hex(5)Fuc(1)	N[+1769]	1234.85	3	3702.54	3702.55	0	-1.9	2243	Specific	276.07	180.99	180.99	6.42	175	>sp|P01266|THYG_HUMAN Thyroglobulin OS=Homo sapiens OX=9606 GN=TG PE=1 SV=5	17152	20210911_zy_tissue_ethcd_1.14616.14616.3	controllerType=0 controllerNumber=1 scan=14616	65.873
13589:3	1	R.FQAPEPLN[+2075.730]WTGSWDASK.P	HexNAc(4)Hex(6)NeuAc(1)	N[+2076]	1337.22	3	4009.64	4009.64	0	-0.1	2243	Specific	276.33	140.3	140.3	5.89	175	>sp|P01266|THYG_HUMAN Thyroglobulin OS=Homo sapiens OX=9606 GN=TG PE=1 SV=5	17152	20210911_zy_tissue_ethcd_1.14928.14928.3	controllerType=0 controllerNumber=1 scan=14928	67.2493
13303:3	1	R.FQAPEPLN[+1971.719]WTGSWDASK.P	HexNAc(5)Hex(5)Fuc(1)	N[+1972]	1302.55	3	3905.62	3905.63	0	-1.6	2243	Specific	279.31	193.66	193.66	6.53	175	>sp|P01266|THYG_HUMAN Thyroglobulin OS=Homo sapiens OX=9606 GN=TG PE=1 SV=5	17152	20210911_zy_tissue_ethcd_1.14615.14615.3	controllerType=0 controllerNumber=1 scan=14615	65.8684
13973:3	1	R.FQAPEPLN[+2075.730]WTGSWDASK.P	HexNAc(4)Hex(6)NeuAc(1)	N[+2076]	1336.88	3	4008.63	4009.64	-1	-0.5	2243	Specific	288.62	136.31	136.31	6.11	175	>sp|P01266|THYG_HUMAN Thyroglobulin OS=Homo sapiens OX=9606 GN=TG PE=1 SV=5	17152	20210911_zy_tissue_ethcd_1.15348.15348.3	controllerType=0 controllerNumber=1 scan=15348	69.1058
13749:3	1	R.FQAPEPLN[+2075.730]WTGSWDASK.P	HexNAc(4)Hex(6)NeuAc(1)	N[+2076]	1337.22	3	4009.64	4009.64	0	-0.1	2243	Specific	299.23	143.28	143.28	5.93	175	>sp|P01266|THYG_HUMAN Thyroglobulin OS=Homo sapiens OX=9606 GN=TG PE=1 SV=5	17152	20210911_zy_tissue_ethcd_1.15103.15103.3	controllerType=0 controllerNumber=1 scan=15103	68.0203
13515:3	1	R.FQAPEPLN[+2075.730]WTGSWDASK.P	HexNAc(4)Hex(6)NeuAc(1)	N[+2076]	1337.22	3	4009.64	4009.64	0	-0.3	2243	Specific	300.07	138.83	138.83	6.25	175	>sp|P01266|THYG_HUMAN Thyroglobulin OS=Homo sapiens OX=9606 GN=TG PE=1 SV=5	17152	20210911_zy_tissue_ethcd_1.14847.14847.3	controllerType=0 controllerNumber=1 scan=14847	66.8918
14065:3	1	R.FQAPEPLN[+2424.867]WTGSWDASK.P	HexNAc(5)Hex(6)Fuc(1)NeuAc(1)	N[+2425]	1453.59	3	4358.77	4358.77	0	-1.9	2243	Specific	342.16	239.12	239.12	6.62	175	>sp|P01266|THYG_HUMAN Thyroglobulin OS=Homo sapiens OX=9606 GN=TG PE=1 SV=5	17152	20210911_zy_tissue_ethcd_1.15449.15449.3	controllerType=0 controllerNumber=1 scan=15449	69.5458
12937:3	1	R.FQAPEPLN[+2075.730]WTGSWDASK.P	HexNAc(4)Hex(6)NeuAc(1)	N[+2076]	1337.22	3	4009.63	4009.64	0	-0.7	2243	Specific	416.79	258.16	258.16	6.32	175	>sp|P01266|THYG_HUMAN Thyroglobulin OS=Homo sapiens OX=9606 GN=TG PE=1 SV=5	17152	20210911_zy_tissue_ethcd_1.14213.14213.3	controllerType=0 controllerNumber=1 scan=14213	64.0716
14814:3	1	R.FQAPEPLN[+2350.830]WTGSWDASK.P	HexNAc(4)Hex(5)Fuc(1)NeuAc(2)	N[+2351]	1428.92	3	4284.74	4284.74	0	-0.7	2243	Specific	441.85	302.74	302.74	6.45	175	>sp|P01266|THYG_HUMAN Thyroglobulin OS=Homo sapiens OX=9606 GN=TG PE=1 SV=5	17152	20210911_zy_tissue_ethcd_1.16270.16270.3	controllerType=0 controllerNumber=1 scan=16270	73.208
14180:3	1	R.FQAPEPLN[+2059.735]WTGSWDASK.P	HexNAc(4)Hex(5)Fuc(1)NeuAc(1)	N[+2060]	1331.89	3	3993.64	3993.64	0	-0.2	2243	Specific	455.73	317.82	317.82	6.61	175	>sp|P01266|THYG_HUMAN Thyroglobulin OS=Homo sapiens OX=9606 GN=TG PE=1 SV=5	17152	20210911_zy_tissue_ethcd_1.15575.15575.3	controllerType=0 controllerNumber=1 scan=15575	70.1026
14115:3	1	R.FQAPEPLN[+2059.735]WTGSWDASK.P	HexNAc(4)Hex(5)Fuc(1)NeuAc(1)	N[+2060]	1331.88	3	3993.64	3993.64	0	-0.9	2243	Specific	575.99	424.86	424.86	8.46	175	>sp|P01266|THYG_HUMAN Thyroglobulin OS=Homo sapiens OX=9606 GN=TG PE=1 SV=5	17152	20210911_zy_tissue_ethcd_1.15504.15504.3	controllerType=0 controllerNumber=1 scan=15504	69.7901
14048:3	1	R.FQAPEPLN[+2350.830]WTGSWDASKPR.A	HexNAc(4)Hex(5)Fuc(1)NeuAc(2)	N[+2351]	1513.3	3	4537.88	4537.89	0	-2.5	2243	Specific	239.18	127.95	41.04	7.5	175	>sp|P01266|THYG_HUMAN Thyroglobulin OS=Homo sapiens OX=9606 GN=TG PE=1 SV=5	17152	20210911_zy_tissue_ethcd_1.15430.15430.3	controllerType=0 controllerNumber=1 scan=15430	69.4654
14024:3	1	R.FQAPEPLN[+2350.830]WTGSWDASKPR.A	HexNAc(4)Hex(5)Fuc(1)NeuAc(2)	N[+2351]	1513.3	3	4537.89	4537.89	0	0.4	2243	Specific	436.68	325.05	325.05	7.32	175	>sp|P01266|THYG_HUMAN Thyroglobulin OS=Homo sapiens OX=9606 GN=TG PE=1 SV=5	17152	20210911_zy_tissue_ethcd_1.15403.15403.3	controllerType=0 controllerNumber=1 scan=15403	69.3496
14037:3	1	R.FQAPEPLN[+2350.830]WTGSWDASKPR.A	HexNAc(4)Hex(5)Fuc(1)NeuAc(2)	N[+2351]	1513.3	3	4537.89	4537.89	0	-0.6	2243	Specific	466.85	359.04	359.04	7.92	175	>sp|P01266|THYG_HUMAN Thyroglobulin OS=Homo sapiens OX=9606 GN=TG PE=1 SV=5	17152	20210911_zy_tissue_ethcd_1.15418.15418.3	controllerType=0 controllerNumber=1 scan=15418	69.4137
13208:3	1	R.FQAPEPLN[+2059.735]WTGSWDASKPR.A	HexNAc(4)Hex(5)Fuc(1)NeuAc(1)	N[+2060]	1416.27	3	4246.79	4246.8	0	-0.8	2243	Specific	584.32	426.19	426.19	10.53	175	>sp|P01266|THYG_HUMAN Thyroglobulin OS=Homo sapiens OX=9606 GN=TG PE=1 SV=5	17152	20210911_zy_tissue_ethcd_1.14511.14511.3	controllerType=0 controllerNumber=1 scan=14511	65.4049
00808:2	1	R.ALEN[+1216.423]ATR.D	HexNAc(2)Hex(5)	N[+1216]	995.918	2	1990.83	1990.83	0	-1.9	2579	Specific	200.9	27.58	27.58	2.13	175	>sp|P01266|THYG_HUMAN Thyroglobulin OS=Homo sapiens OX=9606 GN=TG PE=1 SV=5	17152	20210911_zy_tissue_ethcd_1.905.905.2	controllerType=0 controllerNumber=1 scan=905	4.226
00836:2	1	R.ALEN[+892.317]ATR.D	HexNAc(2)Hex(3)	N[+892]	833.866	2	1666.72	1666.73	0	-1.9	2579	Specific	205.59	45.88	45.88	2.8	175	>sp|P01266|THYG_HUMAN Thyroglobulin OS=Homo sapiens OX=9606 GN=TG PE=1 SV=5	17152	20210911_zy_tissue_ethcd_1.935.935.2	controllerType=0 controllerNumber=1 scan=935	4.3692
00752:2	1	R.ALEN[+1864.634]ATR.D	HexNAc(2)Hex(9)	N[+1865]	1320.02	2	2639.04	2639.04	0	-1	2579	Specific	211.35	49.31	49.31	3.38	175	>sp|P01266|THYG_HUMAN Thyroglobulin OS=Homo sapiens OX=9606 GN=TG PE=1 SV=5	17152	20210911_zy_tissue_ethcd_1.843.843.2	controllerType=0 controllerNumber=1 scan=843	3.9705
00775:2	1	R.ALEN[+1702.581]ATR.D	HexNAc(2)Hex(8)	N[+1703]	1239	2	2476.99	2476.99	0	-1.9	2579	Specific	224.81	3.88	3.88	3.49	175	>sp|P01266|THYG_HUMAN Thyroglobulin OS=Homo sapiens OX=9606 GN=TG PE=1 SV=5	17152	20210911_zy_tissue_ethcd_1.868.868.4	controllerType=0 controllerNumber=1 scan=868	4.0628
00814:2	1	R.ALEN[+1054.370]ATR.D	HexNAc(2)Hex(4)	N[+1054]	914.893	2	1828.78	1828.78	0	-1.4	2579	Specific	290.84	80.31	80.31	4.9	175	>sp|P01266|THYG_HUMAN Thyroglobulin OS=Homo sapiens OX=9606 GN=TG PE=1 SV=5	17152	20210911_zy_tissue_ethcd_1.911.911.2	controllerType=0 controllerNumber=1 scan=911	4.2563
00755:2	1	R.ALEN[+1540.529]ATR.D	HexNAc(2)Hex(7)	N[+1541]	1157.97	2	2314.93	2314.94	0	-1.8	2579	Specific	359.5	114.48	114.48	5.9	175	>sp|P01266|THYG_HUMAN Thyroglobulin OS=Homo sapiens OX=9606 GN=TG PE=1 SV=5	17152	20210911_zy_tissue_ethcd_1.846.846.2	controllerType=0 controllerNumber=1 scan=846	3.9788
03283:3	2	K.KLHINHNN[+2221.788]LTESVGPLPK.S	HexNAc(4)Hex(6)Fuc(1)NeuAc(1)	N[+2222]	1411.64	3	4232.89	4232.9	0	-0.6	120	Specific	224.09	62.2	62.2	5.62	40	>sp|P51884|LUM_HUMAN Lumican OS=Homo sapiens OX=9606 GN=LUM PE=1 SV=2	17011	20210911_zy_tissue_ethcd_1.3621.3621.3	controllerType=0 controllerNumber=1 scan=3621	16.509
03166:4	2	K.KLHINHNN[+3155.132]LTESVGPLPK.S	HexNAc(7)Hex(8)Fuc(1)NeuAc(1)	N[+3155]	1292.07	4	5165.24	5166.24	-1	0.8	120	Specific	290.25	205.76	205.76	6.03	40	>sp|P51884|LUM_HUMAN Lumican OS=Homo sapiens OX=9606 GN=LUM PE=1 SV=2	17011	20210911_zy_tissue_ethcd_1.3492.3492.4	controllerType=0 controllerNumber=1 scan=3492	15.9289
03297:3	2	K.KLHINHNN[+2059.735]LTESVGPLPK.S	HexNAc(4)Hex(5)Fuc(1)NeuAc(1)	N[+2060]	1357.62	3	4070.85	4070.84	0	0.7	120	Specific	309.24	204.57	204.57	5.69	40	>sp|P51884|LUM_HUMAN Lumican OS=Homo sapiens OX=9606 GN=LUM PE=1 SV=2	17011	20210911_zy_tissue_ethcd_1.3636.3636.4	controllerType=0 controllerNumber=1 scan=3636	16.5774
03336:3	2	K.KLHINHNN[+2059.735]LTESVGPLPK.S	HexNAc(4)Hex(5)Fuc(1)NeuAc(1)	N[+2060]	1357.62	3	4070.84	4070.84	0	-1.1	120	Specific	323.7	217.19	217.19	6.42	40	>sp|P51884|LUM_HUMAN Lumican OS=Homo sapiens OX=9606 GN=LUM PE=1 SV=2	17011	20210911_zy_tissue_ethcd_1.3679.3679.3	controllerType=0 controllerNumber=1 scan=3679	16.7714
03257:4	2	K.KLHINHNN[+2424.867]LTESVGPLPK.S	HexNAc(5)Hex(6)Fuc(1)NeuAc(1)	N[+2425]	1109.75	4	4435.96	4435.98	0	-3.3	120	Specific	353.22	296.97	296.97	7	40	>sp|P51884|LUM_HUMAN Lumican OS=Homo sapiens OX=9606 GN=LUM PE=1 SV=2	17011	20210911_zy_tissue_ethcd_1.3592.3592.4	controllerType=0 controllerNumber=1 scan=3592	16.3771
03312:3	2	K.KLHINHNN[+2059.735]LTESVGPLPK.S	HexNAc(4)Hex(5)Fuc(1)NeuAc(1)	N[+2060]	1357.62	3	4070.84	4070.84	0	-0.9	120	Specific	376.32	209.54	209.54	6.65	40	>sp|P51884|LUM_HUMAN Lumican OS=Homo sapiens OX=9606 GN=LUM PE=1 SV=2	17011	20210911_zy_tissue_ethcd_1.3652.3652.3	controllerType=0 controllerNumber=1 scan=3652	16.649
03456:3	2	K.LHINHNN[+2864.036]LTESVGPLPK.S	HexNAc(7)Hex(8)Fuc(1)	N[+2864]	1583.02	3	4747.04	4747.05	0	-1.7	121	Specific	202.12	152.61	152.61	5.51	40	>sp|P51884|LUM_HUMAN Lumican OS=Homo sapiens OX=9606 GN=LUM PE=1 SV=2	17011	20210911_zy_tissue_ethcd_1.3810.3810.3	controllerType=0 controllerNumber=1 scan=3810	17.3775
03433:4	2	K.LHINHNN[+2864.036]LTESVGPLPK.S	HexNAc(7)Hex(8)Fuc(1)	N[+2864]	1187.52	4	4747.04	4747.05	0	-1.8	121	Specific	202.27	202.27	202.27	5.25	40	>sp|P51884|LUM_HUMAN Lumican OS=Homo sapiens OX=9606 GN=LUM PE=1 SV=2	17011	20210911_zy_tissue_ethcd_1.3785.3785.3	controllerType=0 controllerNumber=1 scan=3785	17.2659
04736:3	2	K.LHINHNN[+1897.682]LTESVGPLPK.S	HexNAc(4)Hex(4)Fuc(1)NeuAc(1)	N[+1898]	1260.9	3	3780.69	3780.7	0	-2.5	121	Specific	211.1	86.35	86.35	5.39	40	>sp|P51884|LUM_HUMAN Lumican OS=Homo sapiens OX=9606 GN=LUM PE=1 SV=2	17011	20210911_zy_tissue_ethcd_1.5214.5214.3	controllerType=0 controllerNumber=1 scan=5214	23.7172
05991:4	2	K.LHINHNN[+2715.963]LTESVGPLPK.S	HexNAc(5)Hex(6)Fuc(1)NeuAc(2)	N[+2716]	1150.24	4	4597.96	4598.98	-1	-3.5	121	Specific	215.16	164.25	164.25	4.25	40	>sp|P51884|LUM_HUMAN Lumican OS=Homo sapiens OX=9606 GN=LUM PE=1 SV=2	17011	20210911_zy_tissue_ethcd_1.6591.6591.4	controllerType=0 controllerNumber=1 scan=6591	29.7478
04873:3	2	K.LHINHNN[+2100.761]LTESVGPLPK.S	HexNAc(5)Hex(4)Fuc(1)NeuAc(1)	N[+2101]	1328.59	3	3983.77	3983.77	0	-1.5	121	Specific	215.46	101.86	101.86	5.4	40	>sp|P51884|LUM_HUMAN Lumican OS=Homo sapiens OX=9606 GN=LUM PE=1 SV=2	17011	20210911_zy_tissue_ethcd_1.5364.5364.3	controllerType=0 controllerNumber=1 scan=5364	24.3775
05986:3	2	K.LHINHNN[+2715.963]LTESVGPLPK.S	HexNAc(5)Hex(6)Fuc(1)NeuAc(2)	N[+2716]	1533.66	3	4598.97	4598.98	0	-0.5	121	Specific	218.5	106.09	106.09	5.18	40	>sp|P51884|LUM_HUMAN Lumican OS=Homo sapiens OX=9606 GN=LUM PE=1 SV=2	17011	20210911_zy_tissue_ethcd_1.6586.6586.3	controllerType=0 controllerNumber=1 scan=6586	29.7249
04465:3	2	K.LHINHNN[+2424.867]LTESVGPLPK.S	HexNAc(5)Hex(6)Fuc(1)NeuAc(1)	N[+2425]	1436.63	3	4307.86	4307.88	0	-4.5	121	Specific	221.72	100.21	100.21	6.59	40	>sp|P51884|LUM_HUMAN Lumican OS=Homo sapiens OX=9606 GN=LUM PE=1 SV=2	17011	20210911_zy_tissue_ethcd_1.4917.4917.3	controllerType=0 controllerNumber=1 scan=4917	22.3795
05594:3	2	K.LHINHNN[+2424.867]LTESVGPLPK.S	HexNAc(5)Hex(6)Fuc(1)NeuAc(1)	N[+2425]	1436.62	3	4307.86	4307.88	0	-5.5	121	Specific	225.34	74.55	74.55	6.41	40	>sp|P51884|LUM_HUMAN Lumican OS=Homo sapiens OX=9606 GN=LUM PE=1 SV=2	17011	20210911_zy_tissue_ethcd_1.6156.6156.3	controllerType=0 controllerNumber=1 scan=6156	27.7693
04892:3	2	K.LHINHNN[+2262.814]LTESVGPLPK.S	HexNAc(5)Hex(5)Fuc(1)NeuAc(1)	N[+2263]	1382.61	3	4145.82	4145.83	0	-2.4	121	Specific	239.78	107.11	107.11	6.97	40	>sp|P51884|LUM_HUMAN Lumican OS=Homo sapiens OX=9606 GN=LUM PE=1 SV=2	17011	20210911_zy_tissue_ethcd_1.5384.5384.3	controllerType=0 controllerNumber=1 scan=5384	24.4682
06092:3	2	K.LHINHNN[+2059.735]LTESVGPLPK.S	HexNAc(4)Hex(5)Fuc(1)NeuAc(1)	N[+2060]	1314.91	3	3942.73	3942.75	0	-5.3	121	Specific	243.96	57.26	57.26	6.23	40	>sp|P51884|LUM_HUMAN Lumican OS=Homo sapiens OX=9606 GN=LUM PE=1 SV=2	17011	20210911_zy_tissue_ethcd_1.6702.6702.3	controllerType=0 controllerNumber=1 scan=6702	30.2598
04514:3	2	K.LHINHNN[+2569.905]LTESVGPLPK.S	HexNAc(5)Hex(6)NeuAc(2)	N[+2570]	1485.32	3	4453.93	4452.92	1	3	121	Specific	253.52	134.2	134.2	5.85	40	>sp|P51884|LUM_HUMAN Lumican OS=Homo sapiens OX=9606 GN=LUM PE=1 SV=2	17011	20210911_zy_tissue_ethcd_1.4971.4971.3	controllerType=0 controllerNumber=1 scan=4971	22.6228
08189:3	2	K.LHINHNN[+2350.830]LTESVGPLPK.S	HexNAc(4)Hex(5)Fuc(1)NeuAc(2)	N[+2351]	1412.28	3	4234.83	4233.84	1	-5	121	Specific	254.71	118.57	79.57	6.7	40	>sp|P51884|LUM_HUMAN Lumican OS=Homo sapiens OX=9606 GN=LUM PE=1 SV=2	17011	20210911_zy_tissue_ethcd_1.9005.9005.3	controllerType=0 controllerNumber=1 scan=9005	40.657
03486:3	2	K.LHINHNN[+2498.904]LTESVGPLPK.S	HexNAc(6)Hex(7)Fuc(1)	N[+2499]	1461.31	3	4381.92	4381.92	0	-0.3	121	Specific	263.29	176.3	176.3	6.67	40	>sp|P51884|LUM_HUMAN Lumican OS=Homo sapiens OX=9606 GN=LUM PE=1 SV=2	17011	20210911_zy_tissue_ethcd_1.3843.3843.3	controllerType=0 controllerNumber=1 scan=3843	17.5221
06284:3	2	K.LHINHNN[+2424.867]LTESVGPLPK.S	HexNAc(5)Hex(6)Fuc(1)NeuAc(1)	N[+2425]	1436.96	3	4308.86	4307.88	1	-5.4	121	Specific	265.49	129.73	129.73	6.87	40	>sp|P51884|LUM_HUMAN Lumican OS=Homo sapiens OX=9606 GN=LUM PE=1 SV=2	17011	20210911_zy_tissue_ethcd_1.6913.6913.3	controllerType=0 controllerNumber=1 scan=6913	31.2175
04677:3	2	K.LHINHNN[+1768.640]LTESVGPLPK.S	HexNAc(4)Hex(5)Fuc(1)	N[+1769]	1217.89	3	3651.65	3651.65	0	-1.4	121	Specific	267.85	162.75	162.75	6.98	40	>sp|P51884|LUM_HUMAN Lumican OS=Homo sapiens OX=9606 GN=LUM PE=1 SV=2	17011	20210911_zy_tissue_ethcd_1.5149.5149.3	controllerType=0 controllerNumber=1 scan=5149	23.4261
04585:3	2	K.LHINHNN[+2204.772]LTESVGPLPK.S	HexNAc(4)Hex(5)NeuAc(2)	N[+2205]	1363.6	3	4088.8	4087.79	1	2.2	121	Specific	267.97	124.63	124.63	5.58	40	>sp|P51884|LUM_HUMAN Lumican OS=Homo sapiens OX=9606 GN=LUM PE=1 SV=2	17011	20210911_zy_tissue_ethcd_1.5048.5048.3	controllerType=0 controllerNumber=1 scan=5048	22.9648
05832:4	2	K.LHINHNN[+3446.227]LTESVGPLPK.S	HexNAc(7)Hex(8)Fuc(1)NeuAc(2)	N[+3446]	1332.81	4	5328.21	5329.24	-1	-5.2	121	Specific	271.41	207.99	207.99	6.45	40	>sp|P51884|LUM_HUMAN Lumican OS=Homo sapiens OX=9606 GN=LUM PE=1 SV=2	17011	20210911_zy_tissue_ethcd_1.6417.6417.4	controllerType=0 controllerNumber=1 scan=6417	28.9441
06379:3	2	K.LHINHNN[+2350.830]LTESVGPLPK.S	HexNAc(4)Hex(5)Fuc(1)NeuAc(2)	N[+2351]	1411.95	3	4233.84	4233.84	0	-0.6	121	Specific	274.89	212.28	212.28	6.64	40	>sp|P51884|LUM_HUMAN Lumican OS=Homo sapiens OX=9606 GN=LUM PE=1 SV=2	17011	20210911_zy_tissue_ethcd_1.7017.7017.2	controllerType=0 controllerNumber=1 scan=7017	31.6847
04362:3	2	K.LHINHNN[+3155.132]LTESVGPLPK.S	HexNAc(7)Hex(8)Fuc(1)NeuAc(1)	N[+3155]	1680.05	3	5038.14	5038.14	0	-1.6	121	Specific	276.5	157.51	157.51	7.06	40	>sp|P51884|LUM_HUMAN Lumican OS=Homo sapiens OX=9606 GN=LUM PE=1 SV=2	17011	20210911_zy_tissue_ethcd_1.4804.4804.3	controllerType=0 controllerNumber=1 scan=4804	21.8781
05925:3	2	K.LHINHNN[+3081.095]LTESVGPLPK.S	HexNAc(6)Hex(7)Fuc(1)NeuAc(2)	N[+3081]	1655.38	3	4964.11	4964.11	0	0.9	121	Specific	278.53	162.35	162.35	6.09	40	>sp|P51884|LUM_HUMAN Lumican OS=Homo sapiens OX=9606 GN=LUM PE=1 SV=2	17011	20210911_zy_tissue_ethcd_1.6519.6519.3	controllerType=0 controllerNumber=1 scan=6519	29.4178
03491:3	2	K.LHINHNN[+2498.904]LTESVGPLPK.S	HexNAc(6)Hex(7)Fuc(1)	N[+2499]	1461.31	3	4381.92	4381.92	0	0.1	121	Specific	283.08	203.39	203.39	6.47	40	>sp|P51884|LUM_HUMAN Lumican OS=Homo sapiens OX=9606 GN=LUM PE=1 SV=2	17011	20210911_zy_tissue_ethcd_1.3849.3849.3	controllerType=0 controllerNumber=1 scan=3849	17.5488
06257:3	2	K.LHINHNN[+2715.963]LTESVGPLPK.S	HexNAc(5)Hex(6)Fuc(1)NeuAc(2)	N[+2716]	1533.66	3	4598.98	4598.98	0	0.1	121	Specific	283.99	183.19	183.19	6.35	40	>sp|P51884|LUM_HUMAN Lumican OS=Homo sapiens OX=9606 GN=LUM PE=1 SV=2	17011	20210911_zy_tissue_ethcd_1.6884.6884.3	controllerType=0 controllerNumber=1 scan=6884	31.0851
04593:3	2	K.LHINHNN[+2221.788]LTESVGPLPK.S	HexNAc(4)Hex(6)Fuc(1)NeuAc(1)	N[+2222]	1368.94	3	4104.79	4104.8	0	-2	121	Specific	287.44	138.24	138.24	7.12	40	>sp|P51884|LUM_HUMAN Lumican OS=Homo sapiens OX=9606 GN=LUM PE=1 SV=2	17011	20210911_zy_tissue_ethcd_1.5057.5057.3	controllerType=0 controllerNumber=1 scan=5057	23.0064
03523:4	2	K.LHINHNN[+2336.851]LTESVGPLPK.S	HexNAc(6)Hex(6)Fuc(1)	N[+2337]	1055.72	4	4219.86	4219.86	0	-1.1	121	Specific	288.31	231.69	231.69	6.61	40	>sp|P51884|LUM_HUMAN Lumican OS=Homo sapiens OX=9606 GN=LUM PE=1 SV=2	17011	20210911_zy_tissue_ethcd_1.3884.3884.4	controllerType=0 controllerNumber=1 scan=3884	17.7044
04799:3	2	K.LHINHNN[+2424.867]LTESVGPLPK.S	HexNAc(5)Hex(6)Fuc(1)NeuAc(1)	N[+2425]	1436.63	3	4307.87	4307.88	0	-1.5	121	Specific	291.96	160.96	160.96	7.1	40	>sp|P51884|LUM_HUMAN Lumican OS=Homo sapiens OX=9606 GN=LUM PE=1 SV=2	17011	20210911_zy_tissue_ethcd_1.5283.5283.3	controllerType=0 controllerNumber=1 scan=5283	24.0196
04767:3	2	K.LHINHNN[+2204.772]LTESVGPLPK.S	HexNAc(4)Hex(5)NeuAc(2)	N[+2205]	1363.27	3	4087.79	4087.79	0	0.9	121	Specific	298.58	165.38	165.38	6.14	40	>sp|P51884|LUM_HUMAN Lumican OS=Homo sapiens OX=9606 GN=LUM PE=1 SV=2	17011	20210911_zy_tissue_ethcd_1.5248.5248.3	controllerType=0 controllerNumber=1 scan=5248	23.8652
06288:3	2	K.LHINHNN[+2424.867]LTESVGPLPK.S	HexNAc(5)Hex(6)Fuc(1)NeuAc(1)	N[+2425]	1436.96	3	4308.86	4307.88	1	-4.4	121	Specific	302.39	156.79	156.79	6.79	40	>sp|P51884|LUM_HUMAN Lumican OS=Homo sapiens OX=9606 GN=LUM PE=1 SV=2	17011	20210911_zy_tissue_ethcd_1.6918.6918.3	controllerType=0 controllerNumber=1 scan=6918	31.2377
06146:4	2	K.LHINHNN[+2350.830]LTESVGPLPK.S	HexNAc(4)Hex(5)Fuc(1)NeuAc(2)	N[+2351]	1058.96	4	4232.83	4233.84	-1	-2.7	121	Specific	311.02	244.69	81.74	6.49	40	>sp|P51884|LUM_HUMAN Lumican OS=Homo sapiens OX=9606 GN=LUM PE=1 SV=2	17011	20210911_zy_tissue_ethcd_1.6762.6762.4	controllerType=0 controllerNumber=1 scan=6762	30.5321
06412:3	2	K.LHINHNN[+2350.830]LTESVGPLPK.S	HexNAc(4)Hex(5)Fuc(1)NeuAc(2)	N[+2351]	1411.95	3	4233.84	4233.84	0	-1.3	121	Specific	313.15	177.01	177.01	6.94	40	>sp|P51884|LUM_HUMAN Lumican OS=Homo sapiens OX=9606 GN=LUM PE=1 SV=2	17011	20210911_zy_tissue_ethcd_1.7054.7054.3	controllerType=0 controllerNumber=1 scan=7054	31.8474
05670:4	2	K.LHINHNN[+3446.227]LTESVGPLPK.S	HexNAc(7)Hex(8)Fuc(1)NeuAc(2)	N[+3446]	1333.06	4	5329.23	5329.24	0	-1.8	121	Specific	316.97	251.3	251.3	6.8	40	>sp|P51884|LUM_HUMAN Lumican OS=Homo sapiens OX=9606 GN=LUM PE=1 SV=2	17011	20210911_zy_tissue_ethcd_1.6239.6239.4	controllerType=0 controllerNumber=1 scan=6239	28.1411
03630:3	2	K.LHINHNN[+1809.666]LTESVGPLPK.S	HexNAc(5)Hex(4)Fuc(1)	N[+1810]	1231.57	3	3692.68	3692.68	0	0.5	121	Specific	321.71	230.91	230.91	5.54	40	>sp|P51884|LUM_HUMAN Lumican OS=Homo sapiens OX=9606 GN=LUM PE=1 SV=2	17011	20210911_zy_tissue_ethcd_1.4001.4001.3	controllerType=0 controllerNumber=1 scan=4001	18.2243
05813:4	2	K.LHINHNN[+3446.227]LTESVGPLPK.S	HexNAc(7)Hex(8)Fuc(1)NeuAc(2)	N[+3446]	1332.81	4	5328.23	5329.24	-1	-1.1	121	Specific	336.9	280.48	280.48	6.7	40	>sp|P51884|LUM_HUMAN Lumican OS=Homo sapiens OX=9606 GN=LUM PE=1 SV=2	17011	20210911_zy_tissue_ethcd_1.6396.6396.4	controllerType=0 controllerNumber=1 scan=6396	28.8474
04777:3	2	K.LHINHNN[+2204.772]LTESVGPLPK.S	HexNAc(4)Hex(5)NeuAc(2)	N[+2205]	1363.6	3	4088.8	4087.79	1	1.5	121	Specific	341.64	209.42	209.42	6.33	40	>sp|P51884|LUM_HUMAN Lumican OS=Homo sapiens OX=9606 GN=LUM PE=1 SV=2	17011	20210911_zy_tissue_ethcd_1.5259.5259.3	controllerType=0 controllerNumber=1 scan=5259	23.914
03602:3	2	K.LHINHNN[+1606.587]LTESVGPLPK.S	HexNAc(4)Hex(4)Fuc(1)	N[+1607]	1163.87	3	3489.6	3489.6	0	0.2	121	Specific	352.29	231.53	231.53	6.5	40	>sp|P51884|LUM_HUMAN Lumican OS=Homo sapiens OX=9606 GN=LUM PE=1 SV=2	17011	20210911_zy_tissue_ethcd_1.3970.3970.3	controllerType=0 controllerNumber=1 scan=3970	18.0863
03469:3	2	K.LHINHNN[+2133.772]LTESVGPLPK.S	HexNAc(5)Hex(6)Fuc(1)	N[+2134]	1339.6	3	4016.78	4016.79	0	-0.7	121	Specific	378.23	239.29	239.29	6.87	40	>sp|P51884|LUM_HUMAN Lumican OS=Homo sapiens OX=9606 GN=LUM PE=1 SV=2	17011	20210911_zy_tissue_ethcd_1.3825.3825.3	controllerType=0 controllerNumber=1 scan=3825	17.4403
04580:4	2	K.LHINHNN[+2424.867]LTESVGPLPK.S	HexNAc(5)Hex(6)Fuc(1)NeuAc(1)	N[+2425]	1077.72	4	4307.87	4307.88	0	-1.8	121	Specific	380.23	284.44	284.44	6.92	40	>sp|P51884|LUM_HUMAN Lumican OS=Homo sapiens OX=9606 GN=LUM PE=1 SV=2	17011	20210911_zy_tissue_ethcd_1.5043.5043.3	controllerType=0 controllerNumber=1 scan=5043	22.9439
04594:3	2	K.LHINHNN[+2204.772]LTESVGPLPK.S	HexNAc(4)Hex(5)NeuAc(2)	N[+2205]	1363.61	3	4088.81	4087.79	1	5.4	121	Specific	384.03	235.09	235.09	6.22	40	>sp|P51884|LUM_HUMAN Lumican OS=Homo sapiens OX=9606 GN=LUM PE=1 SV=2	17011	20210911_zy_tissue_ethcd_1.5058.5058.3	controllerType=0 controllerNumber=1 scan=5058	23.011
03408:4	2	K.LHINHNN[+3229.168]LTESVGPLPK.S	HexNAc(8)Hex(9)Fuc(1)	N[+3229]	1278.55	4	5111.18	5112.18	-1	0.4	121	Specific	398.59	350.47	350.47	6.54	40	>sp|P51884|LUM_HUMAN Lumican OS=Homo sapiens OX=9606 GN=LUM PE=1 SV=2	17011	20210911_zy_tissue_ethcd_1.3758.3758.4	controllerType=0 controllerNumber=1 scan=3758	17.139
04582:3	2	K.LHINHNN[+2059.735]LTESVGPLPK.S	HexNAc(4)Hex(5)Fuc(1)NeuAc(1)	N[+2060]	1314.92	3	3942.75	3942.75	0	-0.6	121	Specific	400.42	236.87	236.87	6.91	40	>sp|P51884|LUM_HUMAN Lumican OS=Homo sapiens OX=9606 GN=LUM PE=1 SV=2	17011	20210911_zy_tissue_ethcd_1.5045.5045.3	controllerType=0 controllerNumber=1 scan=5045	22.951
03567:3	2	K.LHINHNN[+1403.507]LTESVGPLPK.S	HexNAc(3)Hex(4)Fuc(1)	N[+1404]	1096.18	3	3286.52	3286.52	0	-0.6	121	Specific	421.67	326.68	326.68	7.04	40	>sp|P51884|LUM_HUMAN Lumican OS=Homo sapiens OX=9606 GN=LUM PE=1 SV=2	17011	20210911_zy_tissue_ethcd_1.3932.3932.3	controllerType=0 controllerNumber=1 scan=3932	17.9173
05598:4	2	K.LHINHNN[+3446.227]LTESVGPLPK.S	HexNAc(7)Hex(8)Fuc(1)NeuAc(2)	N[+3446]	1332.81	4	5328.23	5329.24	-1	-0.8	121	Specific	425.25	349.42	349.42	6.98	40	>sp|P51884|LUM_HUMAN Lumican OS=Homo sapiens OX=9606 GN=LUM PE=1 SV=2	17011	20210911_zy_tissue_ethcd_1.6160.6160.4	controllerType=0 controllerNumber=1 scan=6160	27.789
04842:4	2	K.LHINHNN[+2059.735]LTESVGPLPK.S	HexNAc(4)Hex(5)Fuc(1)NeuAc(1)	N[+2060]	986.44	4	3942.74	3942.75	0	-2.6	121	Specific	427.93	330.17	330.17	6.88	40	>sp|P51884|LUM_HUMAN Lumican OS=Homo sapiens OX=9606 GN=LUM PE=1 SV=2	17011	20210911_zy_tissue_ethcd_1.5330.5330.4	controllerType=0 controllerNumber=1 scan=5330	24.2296
03543:3	2	K.LHINHNN[+1768.640]LTESVGPLPK.S	HexNAc(4)Hex(5)Fuc(1)	N[+1769]	1217.89	3	3651.65	3651.65	0	-0.3	121	Specific	493.44	396.17	396.17	8.43	40	>sp|P51884|LUM_HUMAN Lumican OS=Homo sapiens OX=9606 GN=LUM PE=1 SV=2	17011	20210911_zy_tissue_ethcd_1.3906.3906.3	controllerType=0 controllerNumber=1 scan=3906	17.7998
06278:3	2	K.LHINHNN[+2350.830]LTESVGPLPK.S	HexNAc(4)Hex(5)Fuc(1)NeuAc(2)	N[+2351]	1411.95	3	4233.84	4233.84	0	-1.2	121	Specific	493.74	311.84	311.84	7.29	40	>sp|P51884|LUM_HUMAN Lumican OS=Homo sapiens OX=9606 GN=LUM PE=1 SV=2	17011	20210911_zy_tissue_ethcd_1.6907.6907.3	controllerType=0 controllerNumber=1 scan=6907	31.1888
04830:3	2	K.LHINHNN[+2059.735]LTESVGPLPK.S	HexNAc(4)Hex(5)Fuc(1)NeuAc(1)	N[+2060]	1314.92	3	3942.74	3942.75	0	-1.2	121	Specific	501.16	344.06	344.06	7.58	40	>sp|P51884|LUM_HUMAN Lumican OS=Homo sapiens OX=9606 GN=LUM PE=1 SV=2	17011	20210911_zy_tissue_ethcd_1.5317.5317.3	controllerType=0 controllerNumber=1 scan=5317	24.1722
03600:3	2	K.LHINHNN[+1971.719]LTESVGPLPK.S	HexNAc(5)Hex(5)Fuc(1)	N[+1972]	1285.58	3	3854.73	3854.73	0	-0.3	121	Specific	506.64	413.03	413.03	8.43	40	>sp|P51884|LUM_HUMAN Lumican OS=Homo sapiens OX=9606 GN=LUM PE=1 SV=2	17011	20210911_zy_tissue_ethcd_1.3968.3968.3	controllerType=0 controllerNumber=1 scan=3968	18.0771
04671:3	2	K.LHINHNN[+2262.814]LTESVGPLPK.S	HexNAc(5)Hex(5)Fuc(1)NeuAc(1)	N[+2263]	1382.61	3	4145.82	4145.83	0	-1.1	121	Specific	513.25	336.95	336.95	7.43	40	>sp|P51884|LUM_HUMAN Lumican OS=Homo sapiens OX=9606 GN=LUM PE=1 SV=2	17011	20210911_zy_tissue_ethcd_1.5143.5143.3	controllerType=0 controllerNumber=1 scan=5143	23.3976
06349:3	2	K.LHINHNN[+2350.830]LTESVGPLPK.S	HexNAc(4)Hex(5)Fuc(1)NeuAc(2)	N[+2351]	1411.95	3	4233.84	4233.84	0	-1.2	121	Specific	516.35	323.1	323.1	7.62	40	>sp|P51884|LUM_HUMAN Lumican OS=Homo sapiens OX=9606 GN=LUM PE=1 SV=2	17011	20210911_zy_tissue_ethcd_1.6985.6985.3	controllerType=0 controllerNumber=1 scan=6985	31.5367
04545:3	2	K.LHINHNN[+2424.867]LTESVGPLPK.S	HexNAc(5)Hex(6)Fuc(1)NeuAc(1)	N[+2425]	1436.63	3	4307.88	4307.88	0	-1.2	121	Specific	527.01	351.18	351.18	7.77	40	>sp|P51884|LUM_HUMAN Lumican OS=Homo sapiens OX=9606 GN=LUM PE=1 SV=2	17011	20210911_zy_tissue_ethcd_1.5005.5005.3	controllerType=0 controllerNumber=1 scan=5005	22.7741
06054:3	2	K.LHINHNN[+2715.963]LTESVGPLPK.S	HexNAc(5)Hex(6)Fuc(1)NeuAc(2)	N[+2716]	1533.66	3	4598.97	4598.98	0	-0.6	121	Specific	532.07	376.15	376.15	7.66	40	>sp|P51884|LUM_HUMAN Lumican OS=Homo sapiens OX=9606 GN=LUM PE=1 SV=2	17011	20210911_zy_tissue_ethcd_1.6661.6661.3	controllerType=0 controllerNumber=1 scan=6661	30.0688
04598:3	2	K.LHINHNN[+2059.735]LTESVGPLPK.S	HexNAc(4)Hex(5)Fuc(1)NeuAc(1)	N[+2060]	1314.92	3	3942.74	3942.75	0	-0.9	121	Specific	550.53	325.51	325.51	7.67	40	>sp|P51884|LUM_HUMAN Lumican OS=Homo sapiens OX=9606 GN=LUM PE=1 SV=2	17011	20210911_zy_tissue_ethcd_1.5063.5063.3	controllerType=0 controllerNumber=1 scan=5063	23.0327
05812:4	2	K.LHINHNN[+3081.095]LTESVGPLPK.S	HexNAc(6)Hex(7)Fuc(1)NeuAc(2)	N[+3081]	1241.53	4	4963.1	4964.11	-1	-1	121	Specific	592.99	480.45	480.45	9.61	40	>sp|P51884|LUM_HUMAN Lumican OS=Homo sapiens OX=9606 GN=LUM PE=1 SV=2	17011	20210911_zy_tissue_ethcd_1.6395.6395.4	controllerType=0 controllerNumber=1 scan=6395	28.8427
03458:4	2	K.LHINHNN[+2864.036]LTESVGPLPK.S	HexNAc(7)Hex(8)Fuc(1)	N[+2864]	1187.52	4	4747.04	4747.05	0	-1	121	Specific	595.27	494.35	494.35	9.75	40	>sp|P51884|LUM_HUMAN Lumican OS=Homo sapiens OX=9606 GN=LUM PE=1 SV=2	17011	20210911_zy_tissue_ethcd_1.3813.3813.4	controllerType=0 controllerNumber=1 scan=3813	17.3881
03598:4	2	K.LHINHNN[+1971.719]LTESVGPLPK.S	HexNAc(5)Hex(5)Fuc(1)	N[+1972]	964.437	4	3854.72	3854.73	0	-1.9	121	Specific	617.62	474.28	474.28	10.84	40	>sp|P51884|LUM_HUMAN Lumican OS=Homo sapiens OX=9606 GN=LUM PE=1 SV=2	17011	20210911_zy_tissue_ethcd_1.3966.3966.4	controllerType=0 controllerNumber=1 scan=3966	18.0683
04463:4	2	K.LHINHNN[+2789.999]LTESVGPLPK.S	HexNAc(6)Hex(7)Fuc(1)NeuAc(1)	N[+2790]	1169.01	4	4673	4673.01	0	-1.7	121	Specific	648.46	519.22	519.22	10.84	40	>sp|P51884|LUM_HUMAN Lumican OS=Homo sapiens OX=9606 GN=LUM PE=1 SV=2	17011	20210911_zy_tissue_ethcd_1.4915.4915.4	controllerType=0 controllerNumber=1 scan=4915	22.3712
03532:4	2	K.LHINHNN[+2133.772]LTESVGPLPK.S	HexNAc(5)Hex(6)Fuc(1)	N[+2134]	1004.95	4	4016.78	4016.79	0	-1.8	121	Specific	754.6	635.45	635.45	13.84	40	>sp|P51884|LUM_HUMAN Lumican OS=Homo sapiens OX=9606 GN=LUM PE=1 SV=2	17011	20210911_zy_tissue_ethcd_1.3894.3894.4	controllerType=0 controllerNumber=1 scan=3894	17.7487
14246:3	3	R.MIEN[+2059.735]GSLSFLPTLR.E	HexNAc(4)Hex(5)Fuc(1)NeuAc(1)	N[+2060]	1213.19	3	3637.56	3637.57	0	-1.9	267	Specific	254.09	100.99	100.99	6.48	23	>sp|P21810|PGS1_HUMAN Biglycan OS=Homo sapiens OX=9606 GN=BGN PE=1 SV=2	2124	20210911_zy_tissue_ethcd_1.15647.15647.3	controllerType=0 controllerNumber=1 scan=15647	70.4195
14639:3	3	R.M[+15.995]IEN[+2715.963]GSLSFLPTLR.E	HexNAc(5)Hex(6)Fuc(1)NeuAc(2)	M[+16], N[+2716]	1437.27	3	4309.8	4309.79	0	1.4	267	Specific	250.52	99.79	99.79	5.6	23	>sp|P21810|PGS1_HUMAN Biglycan OS=Homo sapiens OX=9606 GN=BGN PE=1 SV=2	2124	20210911_zy_tissue_ethcd_1.16078.16078.3	controllerType=0 controllerNumber=1 scan=16078	72.3357
13666:3	3	R.M[+15.995]IEN[+2424.867]GSLSFLPTLR.E	HexNAc(5)Hex(6)Fuc(1)NeuAc(1)	M[+16], N[+2425]	1340.23	3	4018.69	4018.7	0	-2.2	267	Specific	397.07	205.63	205.63	6.8	23	>sp|P21810|PGS1_HUMAN Biglycan OS=Homo sapiens OX=9606 GN=BGN PE=1 SV=2	2124	20210911_zy_tissue_ethcd_1.15012.15012.3	controllerType=0 controllerNumber=1 scan=15012	67.6205
13782:3	3	R.M[+15.995]IEN[+2059.735]GSLSFLPTLR.E	HexNAc(4)Hex(5)Fuc(1)NeuAc(1)	M[+16], N[+2060]	1218.53	3	3653.56	3653.57	0	-1.4	267	Specific	401.05	209.21	134.83	6.73	23	>sp|P21810|PGS1_HUMAN Biglycan OS=Homo sapiens OX=9606 GN=BGN PE=1 SV=2	2124	20210911_zy_tissue_ethcd_1.15139.15139.3	controllerType=0 controllerNumber=1 scan=15139	68.1791
14761:3	3	R.M[+15.995]IEN[+2350.830]GSLSFLPTLR.E	HexNAc(4)Hex(5)Fuc(1)NeuAc(2)	M[+16], N[+2351]	1315.56	3	3944.66	3944.66	0	0.2	267	Specific	438.1	239.69	239.69	6.17	23	>sp|P21810|PGS1_HUMAN Biglycan OS=Homo sapiens OX=9606 GN=BGN PE=1 SV=2	2124	20210911_zy_tissue_ethcd_1.16212.16212.3	controllerType=0 controllerNumber=1 scan=16212	72.9461
07367:3	3	K.LLQVVYLHSNN[+2059.735]ITK.V	HexNAc(4)Hex(5)Fuc(1)NeuAc(1)	N[+2060]	1234.56	3	3701.66	3701.67	0	-1.4	301	Specific	202.47	49.05	49.05	4.67	23	>sp|P21810|PGS1_HUMAN Biglycan OS=Homo sapiens OX=9606 GN=BGN PE=1 SV=2	2124	20210911_zy_tissue_ethcd_1.8102.8102.3	controllerType=0 controllerNumber=1 scan=8102	36.592
07372:3	3	K.LLQVVYLHSNN[+2059.735]ITK.V	HexNAc(4)Hex(5)Fuc(1)NeuAc(1)	N[+2060]	1234.56	3	3701.66	3701.67	0	-1.8	301	Specific	227.13	130.47	130.47	6.86	23	>sp|P21810|PGS1_HUMAN Biglycan OS=Homo sapiens OX=9606 GN=BGN PE=1 SV=2	2124	20210911_zy_tissue_ethcd_1.8108.8108.3	controllerType=0 controllerNumber=1 scan=8108	36.6168
07269:3	3	K.LLQVVYLHSNN[+2100.761]ITK.V	HexNAc(5)Hex(4)Fuc(1)NeuAc(1)	N[+2101]	1248.23	3	3742.69	3742.69	0	-0.9	301	Specific	232.89	101.65	101.65	6.65	23	>sp|P21810|PGS1_HUMAN Biglycan OS=Homo sapiens OX=9606 GN=BGN PE=1 SV=2	2124	20210911_zy_tissue_ethcd_1.7995.7995.3	controllerType=0 controllerNumber=1 scan=7995	36.1094
09425:3	3	K.LLQVVYLHSNN[+2715.963]ITK.V	HexNAc(5)Hex(6)Fuc(1)NeuAc(2)	N[+2716]	1453.3	3	4357.9	4357.89	0	0.1	301	Specific	267	155.6	155.6	6.26	23	>sp|P21810|PGS1_HUMAN Biglycan OS=Homo sapiens OX=9606 GN=BGN PE=1 SV=2	2124	20210911_zy_tissue_ethcd_1.10361.10361.3	controllerType=0 controllerNumber=1 scan=10361	46.7607
07338:3	3	K.LLQVVYLHSNN[+2424.867]ITK.V	HexNAc(5)Hex(6)Fuc(1)NeuAc(1)	N[+2425]	1356.27	3	4066.78	4066.8	0	-4	301	Specific	288.16	128.03	128.03	6.64	23	>sp|P21810|PGS1_HUMAN Biglycan OS=Homo sapiens OX=9606 GN=BGN PE=1 SV=2	2124	20210911_zy_tissue_ethcd_1.8071.8071.3	controllerType=0 controllerNumber=1 scan=8071	36.4527
07123:3	3	K.LLQVVYLHSNN[+2424.867]ITK.V	HexNAc(5)Hex(6)Fuc(1)NeuAc(1)	N[+2425]	1356.27	3	4066.79	4066.8	0	-2.3	301	Specific	318.89	156.64	156.64	6.92	23	>sp|P21810|PGS1_HUMAN Biglycan OS=Homo sapiens OX=9606 GN=BGN PE=1 SV=2	2124	20210911_zy_tissue_ethcd_1.7834.7834.3	controllerType=0 controllerNumber=1 scan=7834	35.388
09495:3	3	K.LLQVVYLHSNN[+2350.830]ITK.V	HexNAc(4)Hex(5)Fuc(1)NeuAc(2)	N[+2351]	1331.59	3	3992.75	3992.76	0	-2.1	301	Specific	323.92	200.57	200.57	6.95	23	>sp|P21810|PGS1_HUMAN Biglycan OS=Homo sapiens OX=9606 GN=BGN PE=1 SV=2	2124	20210911_zy_tissue_ethcd_1.10438.10438.3	controllerType=0 controllerNumber=1 scan=10438	47.1056
07263:3	3	K.LLQVVYLHSNN[+2100.761]ITK.V	HexNAc(5)Hex(4)Fuc(1)NeuAc(1)	N[+2101]	1248.24	3	3742.7	3742.69	0	0.3	301	Specific	335.13	172.43	172.43	6.31	23	>sp|P21810|PGS1_HUMAN Biglycan OS=Homo sapiens OX=9606 GN=BGN PE=1 SV=2	2124	20210911_zy_tissue_ethcd_1.7988.7988.3	controllerType=0 controllerNumber=1 scan=7988	36.0803
07146:3	3	K.LLQVVYLHSNN[+2424.867]ITK.V	HexNAc(5)Hex(6)Fuc(1)NeuAc(1)	N[+2425]	1356.27	3	4066.78	4066.8	0	-4.1	301	Specific	337.2	205.05	205.05	6.74	23	>sp|P21810|PGS1_HUMAN Biglycan OS=Homo sapiens OX=9606 GN=BGN PE=1 SV=2	2124	20210911_zy_tissue_ethcd_1.7860.7860.3	controllerType=0 controllerNumber=1 scan=7860	35.4996
09404:3	3	K.LLQVVYLHSNN[+2432.884]ITK.V	HexNAc(6)Hex(3)Fuc(1)NeuAc(2)	N[+2433]	1358.94	3	4074.81	4074.82	0	-0.8	301	Specific	347.64	196.89	196.89	6.79	23	>sp|P21810|PGS1_HUMAN Biglycan OS=Homo sapiens OX=9606 GN=BGN PE=1 SV=2	2124	20210911_zy_tissue_ethcd_1.10338.10338.3	controllerType=0 controllerNumber=1 scan=10338	46.6579
09516:3	3	K.LLQVVYLHSNN[+2350.830]ITK.V	HexNAc(4)Hex(5)Fuc(1)NeuAc(2)	N[+2351]	1331.59	3	3992.75	3992.76	0	-2.1	301	Specific	357.21	224.04	224.04	6.94	23	>sp|P21810|PGS1_HUMAN Biglycan OS=Homo sapiens OX=9606 GN=BGN PE=1 SV=2	2124	20210911_zy_tissue_ethcd_1.10461.10461.3	controllerType=0 controllerNumber=1 scan=10461	47.2076
05437:3	3	K.LLQVVYLHSNN[+1850.693]ITK.V	HexNAc(6)Hex(3)Fuc(1)	N[+1851]	1164.88	3	3492.62	3492.62	0	-2.3	301	Specific	365.91	262.41	262.41	7.12	23	>sp|P21810|PGS1_HUMAN Biglycan OS=Homo sapiens OX=9606 GN=BGN PE=1 SV=2	2124	20210911_zy_tissue_ethcd_1.5984.5984.3	controllerType=0 controllerNumber=1 scan=5984	27.0034
05418:3	3	K.LLQVVYLHSNN[+1850.693]ITK.V	HexNAc(6)Hex(3)Fuc(1)	N[+1851]	1164.88	3	3492.62	3492.62	0	-1.1	301	Specific	387.21	264.96	264.96	6.99	23	>sp|P21810|PGS1_HUMAN Biglycan OS=Homo sapiens OX=9606 GN=BGN PE=1 SV=2	2124	20210911_zy_tissue_ethcd_1.5963.5963.3	controllerType=0 controllerNumber=1 scan=5963	26.9118
07061:3	3	K.LLQVVYLHSNN[+2424.867]ITK.V	HexNAc(5)Hex(6)Fuc(1)NeuAc(1)	N[+2425]	1356.27	3	4066.79	4066.8	0	-1.6	301	Specific	389.01	241.22	241.22	7.01	23	>sp|P21810|PGS1_HUMAN Biglycan OS=Homo sapiens OX=9606 GN=BGN PE=1 SV=2	2124	20210911_zy_tissue_ethcd_1.7767.7767.3	controllerType=0 controllerNumber=1 scan=7767	35.0913
05427:3	3	K.LLQVVYLHSNN[+1850.693]ITK.V	HexNAc(6)Hex(3)Fuc(1)	N[+1851]	1164.88	3	3492.62	3492.62	0	-1.3	301	Specific	389.86	254.64	254.64	7.03	23	>sp|P21810|PGS1_HUMAN Biglycan OS=Homo sapiens OX=9606 GN=BGN PE=1 SV=2	2124	20210911_zy_tissue_ethcd_1.5973.5973.3	controllerType=0 controllerNumber=1 scan=5973	26.956
05372:3	3	K.LLQVVYLHSNN[+1768.640]ITK.V	HexNAc(4)Hex(5)Fuc(1)	N[+1769]	1137.53	3	3410.57	3410.57	0	-1.8	301	Specific	400.93	270.46	270.46	7.12	23	>sp|P21810|PGS1_HUMAN Biglycan OS=Homo sapiens OX=9606 GN=BGN PE=1 SV=2	2124	20210911_zy_tissue_ethcd_1.5913.5913.3	controllerType=0 controllerNumber=1 scan=5913	26.6893
07514:3	3	K.LLQVVYLHSNN[+2100.761]ITK.V	HexNAc(5)Hex(4)Fuc(1)NeuAc(1)	N[+2101]	1248.24	3	3742.69	3742.69	0	-0.6	301	Specific	431.89	269.99	269.99	6.83	23	>sp|P21810|PGS1_HUMAN Biglycan OS=Homo sapiens OX=9606 GN=BGN PE=1 SV=2	2124	20210911_zy_tissue_ethcd_1.8264.8264.3	controllerType=0 controllerNumber=1 scan=8264	37.3137
07485:3	3	K.LLQVVYLHSNN[+2059.735]ITK.V	HexNAc(4)Hex(5)Fuc(1)NeuAc(1)	N[+2060]	1234.56	3	3701.67	3701.67	0	-0.4	301	Specific	440.8	260.4	260.4	6.83	23	>sp|P21810|PGS1_HUMAN Biglycan OS=Homo sapiens OX=9606 GN=BGN PE=1 SV=2	2124	20210911_zy_tissue_ethcd_1.8232.8232.3	controllerType=0 controllerNumber=1 scan=8232	37.1709
07289:3	3	K.LLQVVYLHSNN[+2141.788]ITK.V	HexNAc(6)Hex(3)Fuc(1)NeuAc(1)	N[+2142]	1261.91	3	3783.72	3783.72	0	-0.7	301	Specific	443.58	239.56	239.56	6.76	23	>sp|P21810|PGS1_HUMAN Biglycan OS=Homo sapiens OX=9606 GN=BGN PE=1 SV=2	2124	20210911_zy_tissue_ethcd_1.8017.8017.3	controllerType=0 controllerNumber=1 scan=8017	36.2059
07247:3	3	K.LLQVVYLHSNN[+2059.735]ITK.V	HexNAc(4)Hex(5)Fuc(1)NeuAc(1)	N[+2060]	1234.56	3	3701.66	3701.67	0	-1	301	Specific	457.87	285.71	285.71	7.04	23	>sp|P21810|PGS1_HUMAN Biglycan OS=Homo sapiens OX=9606 GN=BGN PE=1 SV=2	2124	20210911_zy_tissue_ethcd_1.7971.7971.3	controllerType=0 controllerNumber=1 scan=7971	36.0004
07308:3	3	K.LLQVVYLHSNN[+2059.735]ITK.V	HexNAc(4)Hex(5)Fuc(1)NeuAc(1)	N[+2060]	1234.56	3	3701.66	3701.67	0	-0.9	301	Specific	479.53	278.75	278.75	7.07	23	>sp|P21810|PGS1_HUMAN Biglycan OS=Homo sapiens OX=9606 GN=BGN PE=1 SV=2	2124	20210911_zy_tissue_ethcd_1.8038.8038.3	controllerType=0 controllerNumber=1 scan=8038	36.2991
01220:3	4	K.KKEDALN[+2715.963]ETR.E	HexNAc(5)Hex(6)Fuc(1)NeuAc(2)	N[+2716]	1307.2	3	3919.6	3919.6	0	0	80	Specific	234.49	105.76	105.76	5.16	22	>sp|P10909|CLUS_HUMAN Clusterin OS=Homo sapiens OX=9606 GN=CLU PE=1 SV=1	6125	20210911_zy_tissue_ethcd_1.1357.1357.3	controllerType=0 controllerNumber=1 scan=1357	6.3219
01171:3	4	K.KKEDALN[+2569.905]ETR.E	HexNAc(5)Hex(6)NeuAc(2)	N[+2570]	1258.52	3	3773.53	3773.54	0	-1.2	80	Specific	353.01	161.95	161.95	6.04	22	>sp|P10909|CLUS_HUMAN Clusterin OS=Homo sapiens OX=9606 GN=CLU PE=1 SV=1	6125	20210911_zy_tissue_ethcd_1.1304.1304.3	controllerType=0 controllerNumber=1 scan=1304	6.0786
01152:3	4	K.KKEDALN[+2204.772]ETR.E	HexNAc(4)Hex(5)NeuAc(2)	N[+2205]	1136.8	3	3408.4	3408.41	0	-1.5	80	Specific	385.32	162.49	162.49	6.06	22	>sp|P10909|CLUS_HUMAN Clusterin OS=Homo sapiens OX=9606 GN=CLU PE=1 SV=1	6125	20210911_zy_tissue_ethcd_1.1283.1283.3	controllerType=0 controllerNumber=1 scan=1283	5.9808
00870:3	4	K.KKEDALN[+2059.735]ETR.E	HexNAc(4)Hex(5)Fuc(1)NeuAc(1)	N[+2060]	1088.46	3	3263.36	3263.37	0	-2.5	80	Specific	421.72	199.36	199.36	5.66	22	>sp|P10909|CLUS_HUMAN Clusterin OS=Homo sapiens OX=9606 GN=CLU PE=1 SV=1	6125	20210911_zy_tissue_ethcd_1.973.973.3	controllerType=0 controllerNumber=1 scan=973	4.5434
03150:3	4	K.EDALN[+2861.000]ETR.E	HexNAc(5)Hex(6)NeuAc(3)	N[+2861]	1270.15	3	3808.44	3808.44	0	-0.3	82	Specific	220.46	51.01	51.01	2.82	22	>sp|P10909|CLUS_HUMAN Clusterin OS=Homo sapiens OX=9606 GN=CLU PE=1 SV=1	6125	20210911_zy_tissue_ethcd_1.3475.3475.3	controllerType=0 controllerNumber=1 scan=3475	15.8519
10919:3	4	R.LAN[+2204.772]LTQGEDQYYLR.V	HexNAc(4)Hex(5)NeuAc(2)	N[+2205]	1296.87	3	3888.6	3888.61	0	-0.5	372	Specific	205.37	90.71	90.71	4.67	22	>sp|P10909|CLUS_HUMAN Clusterin OS=Homo sapiens OX=9606 GN=CLU PE=1 SV=1	6125	20210911_zy_tissue_ethcd_1.12000.12000.3	controllerType=0 controllerNumber=1 scan=12000	54.1331
08323:3	4	R.LAN[+2059.735]LTQGEDQYYLR.V	HexNAc(4)Hex(5)Fuc(1)NeuAc(1)	N[+2060]	1248.53	3	3743.56	3743.57	0	-1.3	372	Specific	211.1	105.27	105.27	4.89	22	>sp|P10909|CLUS_HUMAN Clusterin OS=Homo sapiens OX=9606 GN=CLU PE=1 SV=1	6125	20210911_zy_tissue_ethcd_1.9152.9152.3	controllerType=0 controllerNumber=1 scan=9152	41.3117
10588:3	4	R.LAN[+2569.905]LTQGEDQYYLR.V	HexNAc(5)Hex(6)NeuAc(2)	N[+2570]	1418.58	3	4253.72	4253.74	0	-3.8	372	Specific	216.17	101.39	101.39	4.65	22	>sp|P10909|CLUS_HUMAN Clusterin OS=Homo sapiens OX=9606 GN=CLU PE=1 SV=1	6125	20210911_zy_tissue_ethcd_1.11637.11637.3	controllerType=0 controllerNumber=1 scan=11637	52.5011
07799:3	4	R.LAN[+2059.735]LTQGEDQYYLR.V	HexNAc(4)Hex(5)Fuc(1)NeuAc(1)	N[+2060]	1248.53	3	3743.56	3743.57	0	-1.5	372	Specific	245.73	135.96	135.96	6.61	22	>sp|P10909|CLUS_HUMAN Clusterin OS=Homo sapiens OX=9606 GN=CLU PE=1 SV=1	6125	20210911_zy_tissue_ethcd_1.8577.8577.3	controllerType=0 controllerNumber=1 scan=8577	38.7355
12898:3	4	R.LAN[+3007.058]LTQGEDQYYLR.V	HexNAc(5)Hex(6)Fuc(1)NeuAc(3)	N[+3007]	1564.3	3	4690.88	4690.89	0	-1.8	372	Specific	255.35	120.49	120.49	6.56	22	>sp|P10909|CLUS_HUMAN Clusterin OS=Homo sapiens OX=9606 GN=CLU PE=1 SV=1	6125	20210911_zy_tissue_ethcd_1.14170.14170.3	controllerType=0 controllerNumber=1 scan=14170	63.8821
07784:3	4	R.LAN[+2059.735]LTQGEDQYYLR.V	HexNAc(4)Hex(5)Fuc(1)NeuAc(1)	N[+2060]	1248.52	3	3743.55	3743.57	0	-4.4	372	Specific	269.1	129.58	129.58	6.33	22	>sp|P10909|CLUS_HUMAN Clusterin OS=Homo sapiens OX=9606 GN=CLU PE=1 SV=1	6125	20210911_zy_tissue_ethcd_1.8560.8560.3	controllerType=0 controllerNumber=1 scan=8560	38.6601
10491:3	4	R.LAN[+2391.857]LTQGEDQYYLR.V	HexNAc(5)Hex(4)Fuc(1)NeuAc(2)	N[+2392]	1359.24	3	4075.7	4075.69	0	2.3	372	Specific	274.98	151.96	151.96	5.43	22	>sp|P10909|CLUS_HUMAN Clusterin OS=Homo sapiens OX=9606 GN=CLU PE=1 SV=1	6125	20210911_zy_tissue_ethcd_1.11531.11531.3	controllerType=0 controllerNumber=1 scan=11531	52.0307
10402:3	4	R.LAN[+2350.830]LTQGEDQYYLR.V	HexNAc(4)Hex(5)Fuc(1)NeuAc(2)	N[+2351]	1345.56	3	4034.65	4034.66	0	-2.5	372	Specific	298.1	135.9	135.9	6.67	22	>sp|P10909|CLUS_HUMAN Clusterin OS=Homo sapiens OX=9606 GN=CLU PE=1 SV=1	6125	20210911_zy_tissue_ethcd_1.11433.11433.3	controllerType=0 controllerNumber=1 scan=11433	51.5908
10608:3	4	R.LAN[+2350.830]LTQGEDQYYLR.V	HexNAc(4)Hex(5)Fuc(1)NeuAc(2)	N[+2351]	1345.56	3	4034.66	4034.66	0	-0.5	372	Specific	334.35	158.28	158.28	6.44	22	>sp|P10909|CLUS_HUMAN Clusterin OS=Homo sapiens OX=9606 GN=CLU PE=1 SV=1	6125	20210911_zy_tissue_ethcd_1.11659.11659.3	controllerType=0 controllerNumber=1 scan=11659	52.602
10742:3	4	R.LAN[+2553.910]LTQGEDQYYLR.V	HexNAc(5)Hex(5)Fuc(1)NeuAc(2)	N[+2554]	1413.25	3	4237.74	4237.74	0	0	372	Specific	335.43	204.04	204.04	6.15	22	>sp|P10909|CLUS_HUMAN Clusterin OS=Homo sapiens OX=9606 GN=CLU PE=1 SV=1	6125	20210911_zy_tissue_ethcd_1.11806.11806.3	controllerType=0 controllerNumber=1 scan=11806	53.2659
10693:3	4	R.LAN[+2553.910]LTQGEDQYYLR.V	HexNAc(5)Hex(5)Fuc(1)NeuAc(2)	N[+2554]	1412.92	3	4236.73	4237.74	-1	-1.6	372	Specific	347.56	200.35	200.35	6.69	22	>sp|P10909|CLUS_HUMAN Clusterin OS=Homo sapiens OX=9606 GN=CLU PE=1 SV=1	6125	20210911_zy_tissue_ethcd_1.11752.11752.3	controllerType=0 controllerNumber=1 scan=11752	53.0191
09869:3	4	R.LAN[+2350.830]LTQGEDQYYLR.V	HexNAc(4)Hex(5)Fuc(1)NeuAc(2)	N[+2351]	1345.56	3	4034.66	4034.66	0	-1.3	372	Specific	387.18	251.28	251.28	6.66	22	>sp|P10909|CLUS_HUMAN Clusterin OS=Homo sapiens OX=9606 GN=CLU PE=1 SV=1	6125	20210911_zy_tissue_ethcd_1.10849.10849.3	controllerType=0 controllerNumber=1 scan=10849	48.9653
10470:3	4	R.LAN[+2350.830]LTQGEDQYYLR.V	HexNAc(4)Hex(5)Fuc(1)NeuAc(2)	N[+2351]	1345.56	3	4034.66	4034.66	0	-1.8	372	Specific	398.43	227.82	227.82	6.67	22	>sp|P10909|CLUS_HUMAN Clusterin OS=Homo sapiens OX=9606 GN=CLU PE=1 SV=1	6125	20210911_zy_tissue_ethcd_1.11508.11508.3	controllerType=0 controllerNumber=1 scan=11508	51.9301
10731:3	4	R.LAN[+2204.772]LTQGEDQYYLR.V	HexNAc(4)Hex(5)NeuAc(2)	N[+2205]	1296.87	3	3888.6	3888.61	0	-1.2	372	Specific	411.91	241.04	241.04	6.6	22	>sp|P10909|CLUS_HUMAN Clusterin OS=Homo sapiens OX=9606 GN=CLU PE=1 SV=1	6125	20210911_zy_tissue_ethcd_1.11794.11794.3	controllerType=0 controllerNumber=1 scan=11794	53.2118
12968:3	4	R.LAN[+2861.000]LTQGEDQYYLR.V	HexNAc(5)Hex(6)NeuAc(3)	N[+2861]	1515.62	3	4544.84	4544.83	0	1.4	372	Specific	434.77	307.31	307.31	5.99	22	>sp|P10909|CLUS_HUMAN Clusterin OS=Homo sapiens OX=9606 GN=CLU PE=1 SV=1	6125	20210911_zy_tissue_ethcd_1.14247.14247.3	controllerType=0 controllerNumber=1 scan=14247	64.2257
01025:3	5	K.TKPREEQYN[+1971.719]STYR.V	HexNAc(5)Hex(5)Fuc(1)	N[+1972]	1215.18	3	3643.52	3643.53	0	-2.9	172	Specific	209.74	21.94	21.94	3.07	27	>sp|P01857|IGHG1_HUMAN Immunoglobulin heavy constant gamma 1 OS=Homo sapiens OX=9606 GN=IGHG1 PE=1 SV=1	9324	20210911_zy_tissue_ethcd_1.1143.1143.3	controllerType=0 controllerNumber=1 scan=1143	5.3467
01013:4	5	K.TKPREEQYN[+1809.666]STYR.V	HexNAc(5)Hex(4)Fuc(1)	N[+1810]	871.123	4	3481.47	3481.47	0	-1	172	Specific	297.07	64.06	64.06	5.5	27	>sp|P01857|IGHG1_HUMAN Immunoglobulin heavy constant gamma 1 OS=Homo sapiens OX=9606 GN=IGHG1 PE=1 SV=1	9324	20210911_zy_tissue_ethcd_1.1130.1130.4	controllerType=0 controllerNumber=1 scan=1130	5.2851
00923:3	5	K.TKPREEQYN[+1768.640]STYR.V	HexNAc(4)Hex(5)Fuc(1)	N[+1769]	1147.49	3	3440.45	3440.45	0	-0.3	172	Specific	364.73	68.22	68.22	5.55	27	>sp|P01857|IGHG1_HUMAN Immunoglobulin heavy constant gamma 1 OS=Homo sapiens OX=9606 GN=IGHG1 PE=1 SV=1	9324	20210911_zy_tissue_ethcd_1.1031.1031.3	controllerType=0 controllerNumber=1 scan=1031	4.8228
00919:4	5	K.TKPREEQYN[+1606.587]STYR.V	HexNAc(4)Hex(4)Fuc(1)	N[+1607]	820.354	4	3278.39	3278.4	0	-0.4	172	Specific	595.38	105.57	105.57	7.14	27	>sp|P01857|IGHG1_HUMAN Immunoglobulin heavy constant gamma 1 OS=Homo sapiens OX=9606 GN=IGHG1 PE=1 SV=1	9324	20210911_zy_tissue_ethcd_1.1027.1027.4	controllerType=0 controllerNumber=1 scan=1027	4.802
01282:3	5	K.PREEQYN[+1971.719]STYR.V	HexNAc(5)Hex(5)Fuc(1)	N[+1972]	1138.8	3	3414.38	3414.38	0	-2	174	Specific	267.51	61.44	61.44	4.36	27	>sp|P01857|IGHG1_HUMAN Immunoglobulin heavy constant gamma 1 OS=Homo sapiens OX=9606 GN=IGHG1 PE=1 SV=1	9324	20210911_zy_tissue_ethcd_1.1426.1426.3	controllerType=0 controllerNumber=1 scan=1426	6.6412
01538:3	5	K.PREEQYN[+1897.682]STYR.V	HexNAc(4)Hex(4)Fuc(1)NeuAc(1)	N[+1898]	1114.12	3	3340.35	3340.35	0	1.2	174	Specific	294.33	53.6	53.6	3.79	27	>sp|P01857|IGHG1_HUMAN Immunoglobulin heavy constant gamma 1 OS=Homo sapiens OX=9606 GN=IGHG1 PE=1 SV=1	9324	20210911_zy_tissue_ethcd_1.1706.1706.3	controllerType=0 controllerNumber=1 scan=1706	7.9038
01180:3	5	K.PREEQYN[+1606.587]STYR.V	HexNAc(4)Hex(4)Fuc(1)	N[+1607]	1017.09	3	3049.25	3049.25	0	-1.6	174	Specific	312.08	102.52	102.52	5.34	27	>sp|P01857|IGHG1_HUMAN Immunoglobulin heavy constant gamma 1 OS=Homo sapiens OX=9606 GN=IGHG1 PE=1 SV=1	9324	20210911_zy_tissue_ethcd_1.1314.1314.3	controllerType=0 controllerNumber=1 scan=1314	6.123
01273:3	5	K.PREEQYN[+1809.666]STYR.V	HexNAc(5)Hex(4)Fuc(1)	N[+1810]	1084.78	3	3252.32	3252.33	0	-2.2	174	Specific	344.85	118.62	118.62	5.49	27	>sp|P01857|IGHG1_HUMAN Immunoglobulin heavy constant gamma 1 OS=Homo sapiens OX=9606 GN=IGHG1 PE=1 SV=1	9324	20210911_zy_tissue_ethcd_1.1416.1416.3	controllerType=0 controllerNumber=1 scan=1416	6.5968
01271:3	5	K.PREEQYN[+1647.613]STYR.V	HexNAc(5)Hex(3)Fuc(1)	N[+1648]	1030.76	3	3090.27	3090.28	0	-1.9	174	Specific	356.85	93.54	93.54	5.11	27	>sp|P01857|IGHG1_HUMAN Immunoglobulin heavy constant gamma 1 OS=Homo sapiens OX=9606 GN=IGHG1 PE=1 SV=1	9324	20210911_zy_tissue_ethcd_1.1414.1414.3	controllerType=0 controllerNumber=1 scan=1414	6.5873
01170:3	5	K.PREEQYN[+1444.534]STYR.V	HexNAc(4)Hex(3)Fuc(1)	N[+1445]	963.069	3	2887.19	2887.2	0	-2.3	174	Specific	365.26	112.68	112.68	5.18	27	>sp|P01857|IGHG1_HUMAN Immunoglobulin heavy constant gamma 1 OS=Homo sapiens OX=9606 GN=IGHG1 PE=1 SV=1	9324	20210911_zy_tissue_ethcd_1.1303.1303.3	controllerType=0 controllerNumber=1 scan=1303	6.0739
01162:3	5	K.PREEQYN[+1768.640]STYR.V	HexNAc(4)Hex(5)Fuc(1)	N[+1769]	1071.1	3	3211.3	3211.31	0	-1.6	174	Specific	375.9	116.43	116.43	5.5	27	>sp|P01857|IGHG1_HUMAN Immunoglobulin heavy constant gamma 1 OS=Homo sapiens OX=9606 GN=IGHG1 PE=1 SV=1	9324	20210911_zy_tissue_ethcd_1.1294.1294.3	controllerType=0 controllerNumber=1 scan=1294	6.0313
01507:3	5	R.EEQYN[+1971.719]STYR.V	HexNAc(5)Hex(5)Fuc(1)	N[+1972]	1054.41	3	3161.23	3161.23	0	-1.7	176	Specific	359.17	129.88	129.88	6.17	27	>sp|P01857|IGHG1_HUMAN Immunoglobulin heavy constant gamma 1 OS=Homo sapiens OX=9606 GN=IGHG1 PE=1 SV=1	9324	20210911_zy_tissue_ethcd_1.1672.1672.3	controllerType=0 controllerNumber=1 scan=1672	7.7589
01410:3	5	R.EEQYN[+1768.640]STYR.V	HexNAc(4)Hex(5)Fuc(1)	N[+1769]	986.72	3	2958.15	2958.15	0	-1.6	176	Specific	374.32	157.82	157.82	6.1	27	>sp|P01857|IGHG1_HUMAN Immunoglobulin heavy constant gamma 1 OS=Homo sapiens OX=9606 GN=IGHG1 PE=1 SV=1	9324	20210911_zy_tissue_ethcd_1.1566.1566.3	controllerType=0 controllerNumber=1 scan=1566	7.2811
01415:2	5	R.EEQYN[+1606.587]STYR.V	HexNAc(4)Hex(4)Fuc(1)	N[+1607]	1398.55	2	2796.1	2796.1	0	-1	176	Specific	391.62	203.61	203.61	6.36	27	>sp|P01857|IGHG1_HUMAN Immunoglobulin heavy constant gamma 1 OS=Homo sapiens OX=9606 GN=IGHG1 PE=1 SV=1	9324	20210911_zy_tissue_ethcd_1.1572.1572.2	controllerType=0 controllerNumber=1 scan=1572	7.3075
01699:3	6	K.TKPREEQFN[+1809.666]STFR.V	HexNAc(5)Hex(4)Fuc(1)	N[+1810]	1150.5	3	3449.48	3449.48	0	-1	168	Specific	257.05	143.79	143.79	5.98	19	>sp|P01859|IGHG2_HUMAN Immunoglobulin heavy constant gamma 2 OS=Homo sapiens OX=9606 GN=IGHG2 PE=1 SV=2	2858	20210911_zy_tissue_ethcd_1.1883.1883.3	controllerType=0 controllerNumber=1 scan=1883	8.7076
01685:3	6	K.TKPREEQFN[+1444.534]STFR.V	HexNAc(4)Hex(3)Fuc(1)	N[+1445]	1028.79	3	3084.35	3084.35	0	-1.6	168	Specific	312.2	173.09	173.09	6.19	19	>sp|P01859|IGHG2_HUMAN Immunoglobulin heavy constant gamma 2 OS=Homo sapiens OX=9606 GN=IGHG2 PE=1 SV=2	2858	20210911_zy_tissue_ethcd_1.1868.1868.3	controllerType=0 controllerNumber=1 scan=1868	8.6335
01676:4	6	K.TKPREEQFN[+1606.587]STFR.V	HexNAc(4)Hex(4)Fuc(1)	N[+1607]	812.355	4	3246.4	3246.41	0	-1.9	168	Specific	635.97	432.37	432.37	9.85	19	>sp|P01859|IGHG2_HUMAN Immunoglobulin heavy constant gamma 2 OS=Homo sapiens OX=9606 GN=IGHG2 PE=1 SV=2	2858	20210911_zy_tissue_ethcd_1.1858.1858.4	controllerType=0 controllerNumber=1 scan=1858	8.5871
01953:3	6	K.PREEQFN[+1444.534]STFR.V	HexNAc(4)Hex(3)Fuc(1)	N[+1445]	952.406	3	2855.2	2855.21	0	-1.8	170	Specific	289.54	198.7	198.7	5	19	>sp|P01859|IGHG2_HUMAN Immunoglobulin heavy constant gamma 2 OS=Homo sapiens OX=9606 GN=IGHG2 PE=1 SV=2	2858	20210911_zy_tissue_ethcd_1.2161.2161.3	controllerType=0 controllerNumber=1 scan=2161	9.9387
01936:3	6	K.PREEQFN[+1606.587]STFR.V	HexNAc(4)Hex(4)Fuc(1)	N[+1607]	1006.42	3	3017.26	3017.26	0	-1.2	170	Specific	407.1	210	210	5.52	19	>sp|P01859|IGHG2_HUMAN Immunoglobulin heavy constant gamma 2 OS=Homo sapiens OX=9606 GN=IGHG2 PE=1 SV=2	2858	20210911_zy_tissue_ethcd_1.2142.2142.3	controllerType=0 controllerNumber=1 scan=2142	9.855
02343:2	6	R.EEQFN[+1241.454]STFR.V	HexNAc(3)Hex(3)Fuc(1)	N[+1241]	1199.99	2	2398.97	2398.98	0	-1.2	172	Specific	208.43	91.57	91.57	4.52	19	>sp|P01859|IGHG2_HUMAN Immunoglobulin heavy constant gamma 2 OS=Homo sapiens OX=9606 GN=IGHG2 PE=1 SV=2	2858	20210911_zy_tissue_ethcd_1.2589.2589.2	controllerType=0 controllerNumber=1 scan=2589	11.8612
02340:2	6	R.EEQFN[+1606.587]STFR.V	HexNAc(4)Hex(4)Fuc(1)	N[+1607]	1382.56	2	2764.11	2764.11	0	-0.8	172	Specific	210.13	72.96	72.96	4.15	19	>sp|P01859|IGHG2_HUMAN Immunoglobulin heavy constant gamma 2 OS=Homo sapiens OX=9606 GN=IGHG2 PE=1 SV=2	2858	20210911_zy_tissue_ethcd_1.2586.2586.2	controllerType=0 controllerNumber=1 scan=2586	11.8456
02394:2	6	R.EEQFN[+1809.666]STFR.V	HexNAc(5)Hex(4)Fuc(1)	N[+1810]	1484.1	2	2967.18	2967.19	0	-1.3	172	Specific	210.32	20.3	20.3	2.16	19	>sp|P01859|IGHG2_HUMAN Immunoglobulin heavy constant gamma 2 OS=Homo sapiens OX=9606 GN=IGHG2 PE=1 SV=2	2858	20210911_zy_tissue_ethcd_1.2645.2645.2	controllerType=0 controllerNumber=1 scan=2645	12.1218
02390:2	6	R.EEQFN[+1444.534]STFR.V	HexNAc(4)Hex(3)Fuc(1)	N[+1445]	1301.53	2	2602.05	2602.06	0	-1.2	172	Specific	221.2	82.77	82.77	5.36	19	>sp|P01859|IGHG2_HUMAN Immunoglobulin heavy constant gamma 2 OS=Homo sapiens OX=9606 GN=IGHG2 PE=1 SV=2	2858	20210911_zy_tissue_ethcd_1.2641.2641.2	controllerType=0 controllerNumber=1 scan=2641	12.1017
03200:3	6	R.EEQFN[+1897.682]STFR.V	HexNAc(4)Hex(4)Fuc(1)NeuAc(1)	N[+1898]	1019.07	3	3055.2	3055.2	0	-1.6	172	Specific	225.89	50.06	50.06	5.33	19	>sp|P01859|IGHG2_HUMAN Immunoglobulin heavy constant gamma 2 OS=Homo sapiens OX=9606 GN=IGHG2 PE=1 SV=2	2858	20210911_zy_tissue_ethcd_1.3530.3530.3	controllerType=0 controllerNumber=1 scan=3530	16.0959
02436:3	6	R.EEQFN[+1647.613]STFR.V	HexNAc(5)Hex(3)Fuc(1)	N[+1648]	935.715	3	2805.13	2805.14	0	-1.8	172	Specific	302.75	113.89	113.89	5.99	19	>sp|P01859|IGHG2_HUMAN Immunoglobulin heavy constant gamma 2 OS=Homo sapiens OX=9606 GN=IGHG2 PE=1 SV=2	2858	20210911_zy_tissue_ethcd_1.2691.2691.3	controllerType=0 controllerNumber=1 scan=2691	12.3363
02379:3	6	R.EEQFN[+1971.719]STFR.V	HexNAc(5)Hex(5)Fuc(1)	N[+1972]	1043.75	3	3129.23	3129.24	0	-2	172	Specific	309.93	151.74	151.74	6.02	19	>sp|P01859|IGHG2_HUMAN Immunoglobulin heavy constant gamma 2 OS=Homo sapiens OX=9606 GN=IGHG2 PE=1 SV=2	2858	20210911_zy_tissue_ethcd_1.2629.2629.3	controllerType=0 controllerNumber=1 scan=2629	12.0444
02329:2	6	R.EEQFN[+1768.640]STFR.V	HexNAc(4)Hex(5)Fuc(1)	N[+1769]	1463.58	2	2926.16	2926.16	0	-0.7	172	Specific	317.7	129.97	129.97	6	19	>sp|P01859|IGHG2_HUMAN Immunoglobulin heavy constant gamma 2 OS=Homo sapiens OX=9606 GN=IGHG2 PE=1 SV=2	2858	20210911_zy_tissue_ethcd_1.2574.2574.2	controllerType=0 controllerNumber=1 scan=2574	11.7902
03128:3	6	R.EEQFN[+2059.735]STFR.V	HexNAc(4)Hex(5)Fuc(1)NeuAc(1)	N[+2060]	1073.09	3	3217.25	3217.26	0	-1.7	172	Specific	356.39	142	142	6.17	19	>sp|P01859|IGHG2_HUMAN Immunoglobulin heavy constant gamma 2 OS=Homo sapiens OX=9606 GN=IGHG2 PE=1 SV=2	2858	20210911_zy_tissue_ethcd_1.3451.3451.3	controllerType=0 controllerNumber=1 scan=3451	15.746
14294:3	7	R.IADTN[+1913.677]ITSIPQGLPPSLTELHLDGNK.I	HexNAc(4)Hex(5)NeuAc(1)	N[+1914]	1553.04	3	4657.11	4658.12	-1	-1.3	207	Specific	206.25	110.53	110.53	5.15	16	>sp|P07585|PGS2_HUMAN Decorin OS=Homo sapiens OX=9606 GN=DCN PE=1 SV=1	10576	20210911_zy_tissue_ethcd_1.15699.15699.3	controllerType=0 controllerNumber=1 scan=15699	70.6511
13835:3	7	R.IADTN[+1419.502]ITSIPQGLPPSLTELHLDGNK.I	HexNAc(3)Hex(5)	N[+1420]	1388.65	3	4163.94	4163.95	0	-1.8	207	Specific	208.83	138.93	138.93	5.41	16	>sp|P07585|PGS2_HUMAN Decorin OS=Homo sapiens OX=9606 GN=DCN PE=1 SV=1	10576	20210911_zy_tissue_ethcd_1.15197.15197.3	controllerType=0 controllerNumber=1 scan=15197	68.438
13805:3	7	R.IADTN[+1581.555]ITSIPQGLPPSLTELHLDGNK.I	HexNAc(3)Hex(6)	N[+1582]	1442.67	3	4326.01	4326	0	1.8	207	Specific	219.04	150.84	150.84	3.76	16	>sp|P07585|PGS2_HUMAN Decorin OS=Homo sapiens OX=9606 GN=DCN PE=1 SV=1	10576	20210911_zy_tissue_ethcd_1.15164.15164.3	controllerType=0 controllerNumber=1 scan=15164	68.2916
13874:3	7	R.IADTN[+1419.502]ITSIPQGLPPSLTELHLDGNK.I	HexNAc(3)Hex(5)	N[+1420]	1388.65	3	4163.95	4163.95	0	0.2	207	Specific	222.79	160.68	160.68	6.27	16	>sp|P07585|PGS2_HUMAN Decorin OS=Homo sapiens OX=9606 GN=DCN PE=1 SV=1	10576	20210911_zy_tissue_ethcd_1.15240.15240.3	controllerType=0 controllerNumber=1 scan=15240	68.6273
13811:4	7	R.IADTN[+1622.582]ITSIPQGLPPSLTELHLDGNK.I	HexNAc(4)Hex(5)	N[+1623]	1092.51	4	4367.02	4367.03	0	-2.5	207	Specific	232.64	211.92	211.92	6.5	16	>sp|P07585|PGS2_HUMAN Decorin OS=Homo sapiens OX=9606 GN=DCN PE=1 SV=1	10576	20210911_zy_tissue_ethcd_1.15171.15171.4	controllerType=0 controllerNumber=1 scan=15171	68.3216
14349:3	7	R.IADTN[+1710.598]ITSIPQGLPPSLTELHLDGNK.I	HexNAc(3)Hex(5)NeuAc(1)	N[+1711]	1485.68	3	4455.04	4455.04	0	-1.4	207	Specific	239.72	152.95	152.95	6.81	16	>sp|P07585|PGS2_HUMAN Decorin OS=Homo sapiens OX=9606 GN=DCN PE=1 SV=1	10576	20210911_zy_tissue_ethcd_1.15760.15760.3	controllerType=0 controllerNumber=1 scan=15760	70.9195
14348:3	7	R.IADTN[+1913.677]ITSIPQGLPPSLTELHLDGNK.I	HexNAc(4)Hex(5)NeuAc(1)	N[+1914]	1553.38	3	4658.12	4658.12	0	-0.2	207	Specific	306.28	201.78	201.78	6.71	16	>sp|P07585|PGS2_HUMAN Decorin OS=Homo sapiens OX=9606 GN=DCN PE=1 SV=1	10576	20210911_zy_tissue_ethcd_1.15759.15759.3	controllerType=0 controllerNumber=1 scan=15759	70.9146
13167:3	7	K.LGLSFNSISAVDN[+1809.666]GSLANTPHLR.E	HexNAc(5)Hex(4)Fuc(1)	N[+1810]	1398.3	3	4192.89	4192.9	0	-2.9	250	Specific	249.08	158.3	158.3	7.19	16	>sp|P07585|PGS2_HUMAN Decorin OS=Homo sapiens OX=9606 GN=DCN PE=1 SV=1	10576	20210911_zy_tissue_ethcd_1.14466.14466.3	controllerType=0 controllerNumber=1 scan=14466	65.2061
13814:3	7	K.LGLSFNSISAVDN[+2059.735]GSLANTPHLR.E	HexNAc(4)Hex(5)Fuc(1)NeuAc(1)	N[+2060]	1481.99	3	4443.95	4442.97	1	-5.2	250	Specific	264.11	122.5	122.5	6.68	16	>sp|P07585|PGS2_HUMAN Decorin OS=Homo sapiens OX=9606 GN=DCN PE=1 SV=1	10576	20210911_zy_tissue_ethcd_1.15174.15174.3	controllerType=0 controllerNumber=1 scan=15174	68.3356
13161:3	7	K.LGLSFNSISAVDN[+1809.666]GSLANTPHLR.E	HexNAc(5)Hex(4)Fuc(1)	N[+1810]	1398.3	3	4192.9	4192.9	0	-0.7	250	Specific	318.29	201.01	201.01	7.16	16	>sp|P07585|PGS2_HUMAN Decorin OS=Homo sapiens OX=9606 GN=DCN PE=1 SV=1	10576	20210911_zy_tissue_ethcd_1.14459.14459.3	controllerType=0 controllerNumber=1 scan=14459	65.1766
13705:3	7	K.LGLSFNSISAVDN[+2424.867]GSLANTPHLR.E	HexNAc(5)Hex(6)Fuc(1)NeuAc(1)	N[+2425]	1603.37	3	4808.1	4808.1	0	-0.2	250	Specific	421.91	281.98	281.98	7.19	16	>sp|P07585|PGS2_HUMAN Decorin OS=Homo sapiens OX=9606 GN=DCN PE=1 SV=1	10576	20210911_zy_tissue_ethcd_1.15054.15054.3	controllerType=0 controllerNumber=1 scan=15054	67.8066
13781:3	7	K.LGLSFNSISAVDN[+2059.735]GSLANTPHLR.E	HexNAc(4)Hex(5)Fuc(1)NeuAc(1)	N[+2060]	1481.66	3	4442.97	4442.97	0	0	250	Specific	474.66	340.84	340.84	7.37	16	>sp|P07585|PGS2_HUMAN Decorin OS=Homo sapiens OX=9606 GN=DCN PE=1 SV=1	10576	20210911_zy_tissue_ethcd_1.15138.15138.3	controllerType=0 controllerNumber=1 scan=15138	68.1741
06718:3	11	K.YRGTAGNALM[+15.995]DGASQLMGEN[+1913.677]R.T	HexNAc(4)Hex(5)NeuAc(1)	M[+16], N[+1914]	1381.23	3	4141.69	4141.7	0	-2.5	375	Specific	241.26	149.64	92.82	6.04	17	>sp|P02675|FIBB_HUMAN Fibrinogen beta chain OS=Homo sapiens OX=9606 GN=FGB PE=1 SV=2	6006	20210911_zy_tissue_ethcd_1.7390.7390.3	controllerType=0 controllerNumber=1 scan=7390	33.379
06734:3	11	K.YRGTAGNALM[+15.995]DGASQLMGEN[+1913.677]R.T	HexNAc(4)Hex(5)NeuAc(1)	M[+16], N[+1914]	1381.24	3	4141.7	4141.7	0	0.2	375	Specific	265.17	185.55	123.65	5.4	17	>sp|P02675|FIBB_HUMAN Fibrinogen beta chain OS=Homo sapiens OX=9606 GN=FGB PE=1 SV=2	6006	20210911_zy_tissue_ethcd_1.7407.7407.3	controllerType=0 controllerNumber=1 scan=7407	33.4568
05784:3	11	K.YRGTAGNALMDGASQLM[+15.995]GEN[+1913.677]R.T	HexNAc(4)Hex(5)NeuAc(1)	M[+16], N[+1914]	1381.23	3	4141.69	4141.7	0	-1.8	375	Specific	278.23	189.74	88.77	6.02	17	>sp|P02675|FIBB_HUMAN Fibrinogen beta chain OS=Homo sapiens OX=9606 GN=FGB PE=1 SV=2	6006	20210911_zy_tissue_ethcd_1.6364.6364.3	controllerType=0 controllerNumber=1 scan=6364	28.7063
05804:3	11	K.YRGTAGNALMDGASQLM[+15.995]GEN[+1913.677]R.T	HexNAc(4)Hex(5)NeuAc(1)	M[+16], N[+1914]	1381.24	3	4141.7	4141.7	0	0	375	Specific	294.78	197.19	78.79	5.55	17	>sp|P02675|FIBB_HUMAN Fibrinogen beta chain OS=Homo sapiens OX=9606 GN=FGB PE=1 SV=2	6006	20210911_zy_tissue_ethcd_1.6386.6386.3	controllerType=0 controllerNumber=1 scan=6386	28.8036
12064:3	11	R.GTAGNALMDGASQLMGEN[+1913.677]R.T	HexNAc(4)Hex(5)NeuAc(1)	N[+1914]	1269.51	3	3806.52	3806.54	0	-3	377	Specific	253.1	128.27	81.28	7.08	17	>sp|P02675|FIBB_HUMAN Fibrinogen beta chain OS=Homo sapiens OX=9606 GN=FGB PE=1 SV=2	6006	20210911_zy_tissue_ethcd_1.13256.13256.3	controllerType=0 controllerNumber=1 scan=13256	59.7741
12002:3	11	R.GTAGNALMDGASQLMGEN[+1913.677]R.T	HexNAc(4)Hex(5)NeuAc(1)	N[+1914]	1269.52	3	3806.53	3806.54	0	-0.8	377	Specific	471.26	298.1	121.6	7.24	17	>sp|P02675|FIBB_HUMAN Fibrinogen beta chain OS=Homo sapiens OX=9606 GN=FGB PE=1 SV=2	6006	20210911_zy_tissue_ethcd_1.13188.13188.3	controllerType=0 controllerNumber=1 scan=13188	59.4669
04096:3	11	R.GTAGNALMDGASQLM[+15.995]GEN[+1954.704]R.T	HexNAc(5)Hex(4)NeuAc(1)	M[+16], N[+1955]	1288.52	3	3863.55	3863.56	0	-1.6	377	Specific	200.74	105.15	105.15	5.11	17	>sp|P02675|FIBB_HUMAN Fibrinogen beta chain OS=Homo sapiens OX=9606 GN=FGB PE=1 SV=2	6006	20210911_zy_tissue_ethcd_1.4513.4513.3	controllerType=0 controllerNumber=1 scan=4513	20.5593
10282:3	11	R.GTAGNALM[+15.995]DGASQLMGEN[+2204.772]R.T	HexNAc(4)Hex(5)NeuAc(2)	M[+16], N[+2205]	1372.22	3	4114.63	4113.63	1	0.8	377	Specific	222.51	98.94	92.41	6.15	17	>sp|P02675|FIBB_HUMAN Fibrinogen beta chain OS=Homo sapiens OX=9606 GN=FGB PE=1 SV=2	6006	20210911_zy_tissue_ethcd_1.11301.11301.3	controllerType=0 controllerNumber=1 scan=11301	50.9966
06216:3	11	R.GTAGNALM[+15.995]DGASQLMGEN[+2221.788]R.T	HexNAc(4)Hex(6)Fuc(1)NeuAc(1)	M[+16], N[+2222]	1377.21	3	4129.62	4130.64	-1	-5.1	377	Specific	262.14	116.06	116.06	6.77	17	>sp|P02675|FIBB_HUMAN Fibrinogen beta chain OS=Homo sapiens OX=9606 GN=FGB PE=1 SV=2	6006	20210911_zy_tissue_ethcd_1.6839.6839.3	controllerType=0 controllerNumber=1 scan=6839	30.8821
06134:3	11	R.GTAGNALM[+15.995]DGASQLMGEN[+2221.788]R.T	HexNAc(4)Hex(6)Fuc(1)NeuAc(1)	M[+16], N[+2222]	1377.21	3	4129.62	4130.64	-1	-4.8	377	Specific	310.1	151.8	149.83	6.86	17	>sp|P02675|FIBB_HUMAN Fibrinogen beta chain OS=Homo sapiens OX=9606 GN=FGB PE=1 SV=2	6006	20210911_zy_tissue_ethcd_1.6749.6749.3	controllerType=0 controllerNumber=1 scan=6749	30.4715
10139:3	11	R.GTAGNALM[+15.995]DGASQLMGEN[+2204.772]R.T	HexNAc(4)Hex(5)NeuAc(2)	M[+16], N[+2205]	1371.88	3	4113.62	4113.63	0	-1.5	377	Specific	328.48	199.31	161.25	7.43	17	>sp|P02675|FIBB_HUMAN Fibrinogen beta chain OS=Homo sapiens OX=9606 GN=FGB PE=1 SV=2	6006	20210911_zy_tissue_ethcd_1.11145.11145.3	controllerType=0 controllerNumber=1 scan=11145	50.2931
08210:3	11	R.GTAGNALM[+15.995]DGASQLMGEN[+1913.677]R.T	HexNAc(4)Hex(5)NeuAc(1)	M[+16], N[+1914]	1274.85	3	3822.52	3822.53	0	-1.7	377	Specific	373.4	216.9	151.54	7.28	17	>sp|P02675|FIBB_HUMAN Fibrinogen beta chain OS=Homo sapiens OX=9606 GN=FGB PE=1 SV=2	6006	20210911_zy_tissue_ethcd_1.9028.9028.3	controllerType=0 controllerNumber=1 scan=9028	40.7601
08044:3	11	R.GTAGNALM[+15.995]DGASQLMGEN[+1913.677]R.T	HexNAc(4)Hex(5)NeuAc(1)	M[+16], N[+1914]	1274.84	3	3822.52	3822.53	0	-2.9	377	Specific	398.62	233.62	126.73	7.25	17	>sp|P02675|FIBB_HUMAN Fibrinogen beta chain OS=Homo sapiens OX=9606 GN=FGB PE=1 SV=2	6006	20210911_zy_tissue_ethcd_1.8846.8846.3	controllerType=0 controllerNumber=1 scan=8846	39.9408
09050:3	11	R.GTAGNALMDGASQLM[+15.995]GEN[+2204.772]R.T	HexNAc(4)Hex(5)NeuAc(2)	M[+16], N[+2205]	1371.88	3	4113.62	4113.63	0	-1.8	377	Specific	404.44	253.26	157.48	7.5	17	>sp|P02675|FIBB_HUMAN Fibrinogen beta chain OS=Homo sapiens OX=9606 GN=FGB PE=1 SV=2	6006	20210911_zy_tissue_ethcd_1.9950.9950.3	controllerType=0 controllerNumber=1 scan=9950	44.9062
07071:3	11	R.GTAGNALMDGASQLM[+15.995]GEN[+1913.677]R.T	HexNAc(4)Hex(5)NeuAc(1)	M[+16], N[+1914]	1274.85	3	3822.53	3822.53	0	-0.7	377	Specific	524.46	344.62	183.81	7.75	17	>sp|P02675|FIBB_HUMAN Fibrinogen beta chain OS=Homo sapiens OX=9606 GN=FGB PE=1 SV=2	6006	20210911_zy_tissue_ethcd_1.7778.7778.3	controllerType=0 controllerNumber=1 scan=7778	35.1391
09152:3	14	K.TVLTPATNHMGN[+1540.529]VTFTIPANR.E	HexNAc(2)Hex(7)	N[+1541]	1265.9	3	3795.68	3795.69	0	-1.4	74	Specific	514.7	394.64	394.64	8.38	7	>sp|P01024|CO3_HUMAN Complement C3 OS=Homo sapiens OX=9606 GN=C3 PE=1 SV=2	731	20210911_zy_tissue_ethcd_1.10062.10062.3	controllerType=0 controllerNumber=1 scan=10062	45.4229
04047:3	14	K.TVLTPATNHM[+15.995]GN[+1419.502]VTFTIPANR.E	HexNAc(3)Hex(5)	M[+16], N[+1420]	1230.89	3	3690.65	3690.66	0	-2	74	Specific	206.77	136.06	136.06	4.68	7	>sp|P01024|CO3_HUMAN Complement C3 OS=Homo sapiens OX=9606 GN=C3 PE=1 SV=2	731	20210911_zy_tissue_ethcd_1.4459.4459.3	controllerType=0 controllerNumber=1 scan=4459	20.3155
06361:3	14	K.TVLTPATNHM[+15.995]GN[+1540.529]VTFTIPANR.E	HexNAc(2)Hex(7)	M[+16], N[+1541]	1271.23	3	3811.68	3811.68	0	-1.4	74	Specific	540.83	390.36	390.36	8.61	7	>sp|P01024|CO3_HUMAN Complement C3 OS=Homo sapiens OX=9606 GN=C3 PE=1 SV=2	731	20210911_zy_tissue_ethcd_1.6998.6998.3	controllerType=0 controllerNumber=1 scan=6998	31.5973
06422:3	14	K.TVLTPATNHM[+15.995]GN[+1378.476]VTFTIPANR.E	HexNAc(2)Hex(6)	M[+16], N[+1378]	1217.21	3	3649.63	3649.63	0	-1.3	74	Specific	598.14	408.89	408.89	9.69	7	>sp|P01024|CO3_HUMAN Complement C3 OS=Homo sapiens OX=9606 GN=C3 PE=1 SV=2	731	20210911_zy_tissue_ethcd_1.7065.7065.3	controllerType=0 controllerNumber=1 scan=7065	31.898
00711:3	16	R.NLHQSN[+2059.735]TSR.A	HexNAc(4)Hex(5)Fuc(1)NeuAc(1)	N[+2060]	1039.42	3	3116.25	3116.25	0	-2.4	1750	Specific	369.23	124.3	124.3	6.32	10	>sp|P98160|PGBM_HUMAN Basement membrane-specific heparan sulfate proteoglycan core protein OS=Homo sapiens OX=9606 GN=HSPG2 PE=1 SV=4	16283	20210911_zy_tissue_ethcd_1.798.798.3	controllerType=0 controllerNumber=1 scan=798	3.7726
00805:3	16	R.NLHQSN[+2350.830]TSR.A	HexNAc(4)Hex(5)Fuc(1)NeuAc(2)	N[+2351]	1136.45	3	3407.33	3407.35	0	-5.7	1750	Specific	383.87	144.28	76.33	6.18	10	>sp|P98160|PGBM_HUMAN Basement membrane-specific heparan sulfate proteoglycan core protein OS=Homo sapiens OX=9606 GN=HSPG2 PE=1 SV=4	16283	20210911_zy_tissue_ethcd_1.901.901.3	controllerType=0 controllerNumber=1 scan=901	4.209
12613:3	16	R.SLTQGSLIVGDLAPVN[+2059.735]GTSQGK.F	HexNAc(4)Hex(5)Fuc(1)NeuAc(1)	N[+2060]	1401.3	3	4201.88	4201.88	0	0.2	3765	Specific	237.4	129.21	129.21	5.77	10	>sp|P98160|PGBM_HUMAN Basement membrane-specific heparan sulfate proteoglycan core protein OS=Homo sapiens OX=9606 GN=HSPG2 PE=1 SV=4	16283	20210911_zy_tissue_ethcd_1.13857.13857.3	controllerType=0 controllerNumber=1 scan=13857	62.4731
12492:3	16	R.SLTQGSLIVGDLAPVN[+2018.708]GTSQGK.F	HexNAc(3)Hex(6)Fuc(1)NeuAc(1)	N[+2019]	1387.62	3	4160.85	4160.85	0	-0.2	3765	Specific	278.54	174.52	174.52	6.04	10	>sp|P98160|PGBM_HUMAN Basement membrane-specific heparan sulfate proteoglycan core protein OS=Homo sapiens OX=9606 GN=HSPG2 PE=1 SV=4	16283	20210911_zy_tissue_ethcd_1.13724.13724.3	controllerType=0 controllerNumber=1 scan=13724	61.8695
10271:3	16	R.SLTQGSLIVGDLAPVN[+1768.640]GTSQGK.F	HexNAc(4)Hex(5)Fuc(1)	N[+1769]	1304.26	3	3910.78	3910.78	0	-0.9	3765	Specific	279.15	201.81	201.81	6.38	10	>sp|P98160|PGBM_HUMAN Basement membrane-specific heparan sulfate proteoglycan core protein OS=Homo sapiens OX=9606 GN=HSPG2 PE=1 SV=4	16283	20210911_zy_tissue_ethcd_1.11289.11289.3	controllerType=0 controllerNumber=1 scan=11289	50.9421
10409:3	16	R.SLTQGSLIVGDLAPVN[+1565.560]GTSQGK.F	HexNAc(3)Hex(5)Fuc(1)	N[+1566]	1236.57	3	3707.69	3707.7	0	-2	3765	Specific	299.02	236.39	236.39	6.47	10	>sp|P98160|PGBM_HUMAN Basement membrane-specific heparan sulfate proteoglycan core protein OS=Homo sapiens OX=9606 GN=HSPG2 PE=1 SV=4	16283	20210911_zy_tissue_ethcd_1.11441.11441.3	controllerType=0 controllerNumber=1 scan=11441	51.6263
12419:3	16	R.SLTQGSLIVGDLAPVN[+2204.772]GTSQGK.F	HexNAc(4)Hex(5)NeuAc(2)	N[+2205]	1449.65	3	4346.92	4346.91	0	2.5	3765	Specific	318.42	224.14	224.14	5.17	10	>sp|P98160|PGBM_HUMAN Basement membrane-specific heparan sulfate proteoglycan core protein OS=Homo sapiens OX=9606 GN=HSPG2 PE=1 SV=4	16283	20210911_zy_tissue_ethcd_1.13645.13645.3	controllerType=0 controllerNumber=1 scan=13645	61.5162
10275:3	16	R.SLTQGSLIVGDLAPVN[+1768.640]GTSQGK.F	HexNAc(4)Hex(5)Fuc(1)	N[+1769]	1304.26	3	3910.77	3910.78	0	-1.3	3765	Specific	368.48	263.73	263.73	6.53	10	>sp|P98160|PGBM_HUMAN Basement membrane-specific heparan sulfate proteoglycan core protein OS=Homo sapiens OX=9606 GN=HSPG2 PE=1 SV=4	16283	20210911_zy_tissue_ethcd_1.11294.11294.3	controllerType=0 controllerNumber=1 scan=11294	50.9624
12460:3	16	R.SLTQGSLIVGDLAPVN[+2059.735]GTSQGK.F	HexNAc(4)Hex(5)Fuc(1)NeuAc(1)	N[+2060]	1401.3	3	4201.87	4201.88	0	-0.1	3765	Specific	648.68	499.74	499.74	9.87	10	>sp|P98160|PGBM_HUMAN Basement membrane-specific heparan sulfate proteoglycan core protein OS=Homo sapiens OX=9606 GN=HSPG2 PE=1 SV=4	16283	20210911_zy_tissue_ethcd_1.13690.13690.3	controllerType=0 controllerNumber=1 scan=13690	61.7166
13559:4	17	K.M[+15.995]VSHHN[+2204.772]LTTGATLINEQWLLTTAK.N	HexNAc(4)Hex(5)NeuAc(2)	M[+16], N[+2205]	1225.79	4	4900.14	4900.16	0	-3.9	179	Specific	414.2	358.92	358.92	7.63	9	>sp|P00738|HPT_HUMAN Haptoglobin OS=Homo sapiens OX=9606 GN=HP PE=1 SV=1	3044	20210911_zy_tissue_ethcd_1.14895.14895.4	controllerType=0 controllerNumber=1 scan=14895	67.1045
05498:4	17	K.NLFLN[+2861.000]HSEN[+1548.545]ATAK.D	HexNAc(5)Hex(6)NeuAc(3),HexNAc(3)Hex(4)NeuAc(1)	N[+1549][+2861]	1467.82	4	5868.28	5868.28	0	-0.4	203	Specific	254.49	254.49	21.58	6.35	9	>sp|P00738|HPT_HUMAN Haptoglobin OS=Homo sapiens OX=9606 GN=HP PE=1 SV=1	3044	20210911_zy_tissue_ethcd_1.6050.6050.4	controllerType=0 controllerNumber=1 scan=6050	27.2986
13962:3	17	K.VVLHPN[+2861.000]YSQVDIGLIK.L	HexNAc(5)Hex(6)NeuAc(3)	N[+2861]	1552.68	3	4656.01	4656.01	0	0.6	236	Specific	213.76	85.42	85.42	3.51	9	>sp|P00738|HPT_HUMAN Haptoglobin OS=Homo sapiens OX=9606 GN=HP PE=1 SV=1	3044	20210911_zy_tissue_ethcd_1.15336.15336.3	controllerType=0 controllerNumber=1 scan=15336	69.0516
11476:3	17	K.VVLHPN[+1913.677]YSQVDIGLIK.L	HexNAc(4)Hex(5)NeuAc(1)	N[+1914]	1236.9	3	3708.68	3708.69	0	-1.8	236	Specific	233.34	93.93	93.93	6.15	9	>sp|P00738|HPT_HUMAN Haptoglobin OS=Homo sapiens OX=9606 GN=HP PE=1 SV=1	3044	20210911_zy_tissue_ethcd_1.12611.12611.3	controllerType=0 controllerNumber=1 scan=12611	56.8826
13993:3	17	K.VVLHPN[+2861.000]YSQVDIGLIK.L	HexNAc(5)Hex(6)NeuAc(3)	N[+2861]	1552.67	3	4656.01	4656.01	0	-0.3	236	Specific	303.8	189.12	189.12	5.96	9	>sp|P00738|HPT_HUMAN Haptoglobin OS=Homo sapiens OX=9606 GN=HP PE=1 SV=1	3044	20210911_zy_tissue_ethcd_1.15370.15370.3	controllerType=0 controllerNumber=1 scan=15370	69.2008
11373:3	17	K.VVLHPN[+1913.677]YSQVDIGLIK.L	HexNAc(4)Hex(5)NeuAc(1)	N[+1914]	1236.9	3	3708.68	3708.69	0	-2.4	236	Specific	306.19	151.93	151.93	6.33	9	>sp|P00738|HPT_HUMAN Haptoglobin OS=Homo sapiens OX=9606 GN=HP PE=1 SV=1	3044	20210911_zy_tissue_ethcd_1.12498.12498.3	controllerType=0 controllerNumber=1 scan=12498	56.3763
13135:3	17	K.VVLHPN[+2569.905]YSQVDIGLIK.L	HexNAc(5)Hex(6)NeuAc(2)	N[+2570]	1455.31	3	4363.91	4364.92	-1	-0.4	236	Specific	308.48	211.99	211.99	5.79	9	>sp|P00738|HPT_HUMAN Haptoglobin OS=Homo sapiens OX=9606 GN=HP PE=1 SV=1	3044	20210911_zy_tissue_ethcd_1.14431.14431.3	controllerType=0 controllerNumber=1 scan=14431	65.0489
13241:3	17	K.VVLHPN[+2204.772]YSQVDIGLIK.L	HexNAc(4)Hex(5)NeuAc(2)	N[+2205]	1333.93	3	3999.78	3999.78	0	-1.3	236	Specific	363.17	189.45	189.45	6.33	9	>sp|P00738|HPT_HUMAN Haptoglobin OS=Homo sapiens OX=9606 GN=HP PE=1 SV=1	3044	20210911_zy_tissue_ethcd_1.14547.14547.3	controllerType=0 controllerNumber=1 scan=14547	65.565
13260:3	17	K.VVLHPN[+2204.772]YSQVDIGLIK.L	HexNAc(4)Hex(5)NeuAc(2)	N[+2205]	1333.93	3	3999.78	3999.78	0	-1	236	Specific	378.22	248.69	248.69	6.34	9	>sp|P00738|HPT_HUMAN Haptoglobin OS=Homo sapiens OX=9606 GN=HP PE=1 SV=1	3044	20210911_zy_tissue_ethcd_1.14568.14568.3	controllerType=0 controllerNumber=1 scan=14568	65.657
05952:3	19	R.GIN[+2059.735]ASSMAWAR.L	HexNAc(4)Hex(5)Fuc(1)NeuAc(1)	N[+2060]	1075.1	3	3223.29	3223.3	0	-2.5	2194	Specific	243.73	100.13	100.13	5.59	8	>sp|O15230|LAMA5_HUMAN Laminin subunit alpha-5 OS=Homo sapiens OX=9606 GN=LAMA5 PE=1 SV=8	2334	20210911_zy_tissue_ethcd_1.6549.6549.3	controllerType=0 controllerNumber=1 scan=6549	29.5527
03088:3	19	R.GIN[+2059.735]ASSM[+15.995]AWAR.L	HexNAc(4)Hex(5)Fuc(1)NeuAc(1)	M[+16], N[+2060]	1080.43	3	3239.29	3239.29	0	-1.6	2194	Specific	205.87	62.91	49.98	3.43	8	>sp|O15230|LAMA5_HUMAN Laminin subunit alpha-5 OS=Homo sapiens OX=9606 GN=LAMA5 PE=1 SV=8	2334	20210911_zy_tissue_ethcd_1.3407.3407.3	controllerType=0 controllerNumber=1 scan=3407	15.5471
10439:3	19	R.LN[+2059.735]ASIADLQSQLR.S	HexNAc(4)Hex(5)Fuc(1)NeuAc(1)	N[+2060]	1163.51	3	3488.51	3488.52	0	-2.6	2208	Specific	355.89	169.08	169.08	6.71	8	>sp|O15230|LAMA5_HUMAN Laminin subunit alpha-5 OS=Homo sapiens OX=9606 GN=LAMA5 PE=1 SV=8	2334	20210911_zy_tissue_ethcd_1.11474.11474.3	controllerType=0 controllerNumber=1 scan=11474	51.7763
02815:4	19	R.KQELSRDN[+2059.735]ATLQATLHAAR.D	HexNAc(4)Hex(5)Fuc(1)NeuAc(1)	N[+2060]	1046.47	4	4182.86	4182.87	0	-0.7	2416	Specific	409.82	337.72	337.72	7.47	8	>sp|O15230|LAMA5_HUMAN Laminin subunit alpha-5 OS=Homo sapiens OX=9606 GN=LAMA5 PE=1 SV=8	2334	20210911_zy_tissue_ethcd_1.3108.3108.4	controllerType=0 controllerNumber=1 scan=3108	14.2083
02337:3	19	R.DN[+1622.582]ATLQATLHAAR.D	HexNAc(4)Hex(5)	N[+1623]	1002.1	3	3004.3	3004.3	0	-1.1	2422	Specific	224.99	108.17	108.17	6.73	8	>sp|O15230|LAMA5_HUMAN Laminin subunit alpha-5 OS=Homo sapiens OX=9606 GN=LAMA5 PE=1 SV=8	2334	20210911_zy_tissue_ethcd_1.2582.2582.3	controllerType=0 controllerNumber=1 scan=2582	11.83
03024:3	19	R.DN[+1913.677]ATLQATLHAAR.D	HexNAc(4)Hex(5)NeuAc(1)	N[+1914]	1099.14	3	3295.39	3295.4	0	-1.2	2422	Specific	305.77	133.33	133.33	6.87	8	>sp|O15230|LAMA5_HUMAN Laminin subunit alpha-5 OS=Homo sapiens OX=9606 GN=LAMA5 PE=1 SV=8	2334	20210911_zy_tissue_ethcd_1.3337.3337.3	controllerType=0 controllerNumber=1 scan=3337	15.2332
04070:3	19	R.GVHN[+2059.735]ASLALSASIGR.V	HexNAc(4)Hex(5)Fuc(1)NeuAc(1)	N[+2060]	1171.51	3	3512.52	3512.53	0	-2.2	2704	Specific	364.05	182.13	182.13	6.39	8	>sp|O15230|LAMA5_HUMAN Laminin subunit alpha-5 OS=Homo sapiens OX=9606 GN=LAMA5 PE=1 SV=8	2334	20210911_zy_tissue_ethcd_1.4484.4484.3	controllerType=0 controllerNumber=1 scan=4484	20.4294
04080:3	19	R.GVHN[+2059.735]ASLALSASIGR.V	HexNAc(4)Hex(5)Fuc(1)NeuAc(1)	N[+2060]	1171.51	3	3512.52	3512.53	0	-2.9	2704	Specific	400.38	211.04	211.04	6.18	8	>sp|O15230|LAMA5_HUMAN Laminin subunit alpha-5 OS=Homo sapiens OX=9606 GN=LAMA5 PE=1 SV=8	2334	20210911_zy_tissue_ethcd_1.4495.4495.3	controllerType=0 controllerNumber=1 scan=4495	20.4768
06627:3	20	R.HLYTTTGGETDFTN[+1864.634]VTSLR.G	HexNAc(2)Hex(9)	N[+1865]	1326.56	3	3977.65	3977.65	0	0.1	393	Specific	404.85	315.45	315.45	7.16	2	>sp|Q99523|SORT_HUMAN Sortilin OS=Homo sapiens OX=9606 GN=SORT1 PE=1 SV=3	15998	20210911_zy_tissue_ethcd_1.7290.7290.3	controllerType=0 controllerNumber=1 scan=7290	32.9204
06571:3	20	R.HLYTTTGGETDFTN[+1864.634]VTSLR.G	HexNAc(2)Hex(9)	N[+1865]	1326.56	3	3977.65	3977.65	0	-0.8	393	Specific	560.56	424.84	424.84	9.28	2	>sp|Q99523|SORT_HUMAN Sortilin OS=Homo sapiens OX=9606 GN=SORT1 PE=1 SV=3	15998	20210911_zy_tissue_ethcd_1.7228.7228.3	controllerType=0 controllerNumber=1 scan=7228	32.6436
06575:3	20	R.HLYTTTGGETDFTN[+2026.687]VTSLR.G	HexNAc(2)Hex(10)	N[+2027]	1380.57	3	4139.7	4139.71	0	-1	393	Specific	637.38	482.29	482.29	11.53	2	>sp|Q99523|SORT_HUMAN Sortilin OS=Homo sapiens OX=9606 GN=SORT1 PE=1 SV=3	15998	20210911_zy_tissue_ethcd_1.7233.7233.3	controllerType=0 controllerNumber=1 scan=7233	32.6635
06560:3	20	R.HLYTTTGGETDFTN[+2026.687]VTSLR.G	HexNAc(2)Hex(10)	N[+2027]	1380.57	3	4139.7	4139.71	0	-1.1	393	Specific	673.53	525.95	525.95	12.53	2	>sp|Q99523|SORT_HUMAN Sortilin OS=Homo sapiens OX=9606 GN=SORT1 PE=1 SV=3	15998	20210911_zy_tissue_ethcd_1.7216.7216.3	controllerType=0 controllerNumber=1 scan=7216	32.5852
02761:3	21	R.VYKPSAGN[+2569.905]NSLYR.D	HexNAc(5)Hex(6)NeuAc(2)	N[+2570]	1346.89	3	4038.66	4038.66	0	0.6	155	Specific	208.58	70.43	70.43	3.81	8	>sp|P02749|APOH_HUMAN Beta-2-glycoprotein 1 OS=Homo sapiens OX=9606 GN=APOH PE=1 SV=3	19971	20210911_zy_tissue_ethcd_1.3048.3048.3	controllerType=0 controllerNumber=1 scan=3048	13.941
03658:3	21	R.VYKPSAGN[+2861.000]NSLYR.D	HexNAc(5)Hex(6)NeuAc(3)	N[+2861]	1443.92	3	4329.75	4329.75	0	-0.6	155	Specific	307.78	150.21	150.21	6.62	8	>sp|P02749|APOH_HUMAN Beta-2-glycoprotein 1 OS=Homo sapiens OX=9606 GN=APOH PE=1 SV=3	19971	20210911_zy_tissue_ethcd_1.4032.4032.3	controllerType=0 controllerNumber=1 scan=4032	18.3653
02814:3	21	R.VYKPSAGN[+2350.830]NSLYR.D	HexNAc(4)Hex(5)Fuc(1)NeuAc(2)	N[+2351]	1273.86	3	3819.58	3819.58	0	-2.1	155	Specific	313.07	132.44	132.44	6.94	8	>sp|P02749|APOH_HUMAN Beta-2-glycoprotein 1 OS=Homo sapiens OX=9606 GN=APOH PE=1 SV=3	19971	20210911_zy_tissue_ethcd_1.3107.3107.3	controllerType=0 controllerNumber=1 scan=3107	14.2033
02793:3	21	R.VYKPSAGN[+2204.772]NSLYR.D	HexNAc(4)Hex(5)NeuAc(2)	N[+2205]	1225.18	3	3673.52	3673.53	0	-1.3	155	Specific	441.83	209.29	209.29	7.02	8	>sp|P02749|APOH_HUMAN Beta-2-glycoprotein 1 OS=Homo sapiens OX=9606 GN=APOH PE=1 SV=3	19971	20210911_zy_tissue_ethcd_1.3084.3084.3	controllerType=0 controllerNumber=1 scan=3084	14.1012
03288:3	21	K.PSAGN[+2861.000]NSLYR.D	HexNAc(5)Hex(6)NeuAc(3)	N[+2861]	1313.85	3	3939.53	3939.53	0	1.4	158	Specific	215.52	50.49	50.49	2.73	8	>sp|P02749|APOH_HUMAN Beta-2-glycoprotein 1 OS=Homo sapiens OX=9606 GN=APOH PE=1 SV=3	19971	20210911_zy_tissue_ethcd_1.3626.3626.3	controllerType=0 controllerNumber=1 scan=3626	16.5331
03253:3	21	K.PSAGN[+2861.000]NSLYR.D	HexNAc(5)Hex(6)NeuAc(3)	N[+2861]	1313.85	3	3939.52	3939.53	0	-1.3	158	Specific	342.96	120.88	120.88	5.99	8	>sp|P02749|APOH_HUMAN Beta-2-glycoprotein 1 OS=Homo sapiens OX=9606 GN=APOH PE=1 SV=3	19971	20210911_zy_tissue_ethcd_1.3588.3588.3	controllerType=0 controllerNumber=1 scan=3588	16.359
02403:3	21	K.PSAGN[+2350.830]NSLYR.D	HexNAc(4)Hex(5)Fuc(1)NeuAc(2)	N[+2351]	1143.79	3	3429.35	3429.36	0	-1.6	158	Specific	352.78	124.21	124.21	6.12	8	>sp|P02749|APOH_HUMAN Beta-2-glycoprotein 1 OS=Homo sapiens OX=9606 GN=APOH PE=1 SV=3	19971	20210911_zy_tissue_ethcd_1.2655.2655.3	controllerType=0 controllerNumber=1 scan=2655	12.17
01252:3	22	R.GN[+2059.735]GSRPSSPEEVK.F	HexNAc(4)Hex(5)Fuc(1)NeuAc(1)	N[+2060]	1135.13	3	3403.39	3403.39	0	-1.1	136	Specific	203.47	22.67	22.67	3.5	8	>sp|Q05707|COEA1_HUMAN Collagen alpha-1(XIV) chain OS=Homo sapiens OX=9606 GN=COL14A1 PE=1 SV=3	7022	20210911_zy_tissue_ethcd_1.1393.1393.3	controllerType=0 controllerNumber=1 scan=1393	6.4887
00960:3	22	R.GN[+1971.719]GSRPSSPEEVK.F	HexNAc(5)Hex(5)Fuc(1)	N[+1972]	1105.79	3	3315.37	3315.37	0	-1.7	136	Specific	326.07	159.98	159.98	6.57	8	>sp|Q05707|COEA1_HUMAN Collagen alpha-1(XIV) chain OS=Homo sapiens OX=9606 GN=COL14A1 PE=1 SV=3	7022	20210911_zy_tissue_ethcd_1.1072.1072.3	controllerType=0 controllerNumber=1 scan=1072	5.0083
01215:3	22	R.GN[+2059.735]GSRPSSPEEVK.F	HexNAc(4)Hex(5)Fuc(1)NeuAc(1)	N[+2060]	1135.13	3	3403.38	3403.39	0	-2.2	136	Specific	336.77	150.14	150.14	7	8	>sp|Q05707|COEA1_HUMAN Collagen alpha-1(XIV) chain OS=Homo sapiens OX=9606 GN=COL14A1 PE=1 SV=3	7022	20210911_zy_tissue_ethcd_1.1352.1352.3	controllerType=0 controllerNumber=1 scan=1352	6.2982
00898:3	22	R.GN[+1768.640]GSRPSSPEEVK.F	HexNAc(4)Hex(5)Fuc(1)	N[+1769]	1038.1	3	3112.29	3112.29	0	-1.6	136	Specific	340.83	198.6	198.6	7.05	8	>sp|Q05707|COEA1_HUMAN Collagen alpha-1(XIV) chain OS=Homo sapiens OX=9606 GN=COL14A1 PE=1 SV=3	7022	20210911_zy_tissue_ethcd_1.1004.1004.3	controllerType=0 controllerNumber=1 scan=1004	4.6894
01182:3	22	R.GN[+2059.735]GSRPSSPEEVK.F	HexNAc(4)Hex(5)Fuc(1)NeuAc(1)	N[+2060]	1135.13	3	3403.39	3403.39	0	-1	136	Specific	408.87	240.17	240.17	6.97	8	>sp|Q05707|COEA1_HUMAN Collagen alpha-1(XIV) chain OS=Homo sapiens OX=9606 GN=COL14A1 PE=1 SV=3	7022	20210911_zy_tissue_ethcd_1.1316.1316.3	controllerType=0 controllerNumber=1 scan=1316	6.1315
01188:3	22	R.GN[+2100.761]GSRPSSPEEVK.F	HexNAc(5)Hex(4)Fuc(1)NeuAc(1)	N[+2101]	1148.81	3	3444.41	3444.42	0	-1.2	136	Specific	417.64	159.12	159.12	6.39	8	>sp|Q05707|COEA1_HUMAN Collagen alpha-1(XIV) chain OS=Homo sapiens OX=9606 GN=COL14A1 PE=1 SV=3	7022	20210911_zy_tissue_ethcd_1.1322.1322.3	controllerType=0 controllerNumber=1 scan=1322	6.1613
07780:3	22	R.SFMVN[+1913.677]WTHAPGNVEK.Y	HexNAc(4)Hex(5)NeuAc(1)	N[+1914]	1210.83	3	3630.49	3630.49	0	-2.1	368	Specific	276.75	109.91	87.33	6.27	8	>sp|Q05707|COEA1_HUMAN Collagen alpha-1(XIV) chain OS=Homo sapiens OX=9606 GN=COL14A1 PE=1 SV=3	7022	20210911_zy_tissue_ethcd_1.8556.8556.3	controllerType=0 controllerNumber=1 scan=8556	38.6397
07790:3	22	R.SFMVN[+1913.677]WTHAPGNVEK.Y	HexNAc(4)Hex(5)NeuAc(1)	N[+1914]	1210.83	3	3630.48	3630.49	0	-3.1	368	Specific	297.96	92.8	92.8	6.06	8	>sp|Q05707|COEA1_HUMAN Collagen alpha-1(XIV) chain OS=Homo sapiens OX=9606 GN=COL14A1 PE=1 SV=3	7022	20210911_zy_tissue_ethcd_1.8567.8567.3	controllerType=0 controllerNumber=1 scan=8567	38.6916
08428:3	23	R.YHYN[+1702.581]GTFLDGTLFDSSHNR.M	HexNAc(2)Hex(8)	N[+1703]	1316.2	3	3946.59	3946.59	0	-1	171	Specific	419.19	303.73	303.73	7.9	7	>sp|O95302|FKBP9_HUMAN Peptidyl-prolyl cis-trans isomerase FKBP9 OS=Homo sapiens OX=9606 GN=FKBP9 PE=1 SV=2	1555	20210911_zy_tissue_ethcd_1.9267.9267.3	controllerType=0 controllerNumber=1 scan=9267	41.824
11532:3	23	R.YHYN[+1864.634]GTLLDGTLFDSSYSR.N	HexNAc(2)Hex(9)	N[+1865]	1358.22	3	4072.66	4073.65	-1	2.4	283	Specific	266.47	163.39	163.39	6.21	7	>sp|O95302|FKBP9_HUMAN Peptidyl-prolyl cis-trans isomerase FKBP9 OS=Homo sapiens OX=9606 GN=FKBP9 PE=1 SV=2	1555	20210911_zy_tissue_ethcd_1.12672.12672.3	controllerType=0 controllerNumber=1 scan=12672	57.1559
11583:3	23	R.YHYN[+1702.581]GTLLDGTLFDSSYSR.N	HexNAc(2)Hex(8)	N[+1703]	1304.54	3	3911.59	3911.6	0	-1.6	283	Specific	365.72	291.16	291.16	7.75	7	>sp|O95302|FKBP9_HUMAN Peptidyl-prolyl cis-trans isomerase FKBP9 OS=Homo sapiens OX=9606 GN=FKBP9 PE=1 SV=2	1555	20210911_zy_tissue_ethcd_1.12728.12728.3	controllerType=0 controllerNumber=1 scan=12728	57.4029
01332:3	24	K.TKPREEQFN[+1768.640]STYR.V	HexNAc(4)Hex(5)Fuc(1)	N[+1769]	1142.15	3	3424.44	3424.45	0	-4.3	169	Specific	206.71	69.09	69.09	3.71	14	>sp|P01861|IGHG4_HUMAN Immunoglobulin heavy constant gamma 4 OS=Homo sapiens OX=9606 GN=IGHG4 PE=1 SV=1	12793	20210911_zy_tissue_ethcd_1.1481.1481.3	controllerType=0 controllerNumber=1 scan=1481	6.8891
01324:3	24	K.TKPREEQFN[+1606.587]STYR.V	HexNAc(4)Hex(4)Fuc(1)	N[+1607]	1088.14	3	3262.4	3262.4	0	-1.3	169	Specific	297.9	104.26	104.26	5.94	14	>sp|P01861|IGHG4_HUMAN Immunoglobulin heavy constant gamma 4 OS=Homo sapiens OX=9606 GN=IGHG4 PE=1 SV=1	12793	20210911_zy_tissue_ethcd_1.1472.1472.3	controllerType=0 controllerNumber=1 scan=1472	6.8478
01603:3	24	K.PREEQFN[+1768.640]STYR.V	HexNAc(4)Hex(5)Fuc(1)	N[+1769]	1065.77	3	3195.31	3195.31	0	-0.8	171	Specific	222.69	59.94	59.94	4.48	14	>sp|P01861|IGHG4_HUMAN Immunoglobulin heavy constant gamma 4 OS=Homo sapiens OX=9606 GN=IGHG4 PE=1 SV=1	12793	20210911_zy_tissue_ethcd_1.1778.1778.3	controllerType=0 controllerNumber=1 scan=1778	8.2297
01614:3	24	K.PREEQFN[+1444.534]STYR.V	HexNAc(4)Hex(3)Fuc(1)	N[+1445]	957.738	3	2871.2	2871.2	0	-1.6	171	Specific	244.83	87.71	87.71	4.91	14	>sp|P01861|IGHG4_HUMAN Immunoglobulin heavy constant gamma 4 OS=Homo sapiens OX=9606 GN=IGHG4 PE=1 SV=1	12793	20210911_zy_tissue_ethcd_1.1790.1790.3	controllerType=0 controllerNumber=1 scan=1790	8.2851
01803:2	24	R.EEQFN[+1606.587]STYR.V	HexNAc(4)Hex(4)Fuc(1)	N[+1607]	1390.55	2	2780.1	2780.1	0	-1.1	173	Specific	200.65	56.25	56.25	3.85	14	>sp|P01861|IGHG4_HUMAN Immunoglobulin heavy constant gamma 4 OS=Homo sapiens OX=9606 GN=IGHG4 PE=1 SV=1	12793	20210911_zy_tissue_ethcd_1.1997.1997.2	controllerType=0 controllerNumber=1 scan=1997	9.2055
02222:3	24	R.EEQFN[+1897.682]STYR.V	HexNAc(4)Hex(4)Fuc(1)NeuAc(1)	N[+1898]	1024.4	3	3071.19	3071.2	0	-2	173	Specific	281.43	65.63	65.63	5.57	14	>sp|P01861|IGHG4_HUMAN Immunoglobulin heavy constant gamma 4 OS=Homo sapiens OX=9606 GN=IGHG4 PE=1 SV=1	12793	20210911_zy_tissue_ethcd_1.2456.2456.3	controllerType=0 controllerNumber=1 scan=2456	11.2495
01819:3	24	R.EEQFN[+1444.534]STYR.V	HexNAc(4)Hex(3)Fuc(1)	N[+1445]	873.354	3	2618.05	2618.05	0	-1.2	173	Specific	313.07	32.52	32.52	4.72	14	>sp|P01861|IGHG4_HUMAN Immunoglobulin heavy constant gamma 4 OS=Homo sapiens OX=9606 GN=IGHG4 PE=1 SV=1	12793	20210911_zy_tissue_ethcd_1.2014.2014.5	controllerType=0 controllerNumber=1 scan=2014	9.2841
02168:3	24	R.EEQFN[+2059.735]STYR.V	HexNAc(4)Hex(5)Fuc(1)NeuAc(1)	N[+2060]	1078.42	3	3233.25	3233.25	0	-1.7	173	Specific	371.66	135.98	135.98	6.12	14	>sp|P01861|IGHG4_HUMAN Immunoglobulin heavy constant gamma 4 OS=Homo sapiens OX=9606 GN=IGHG4 PE=1 SV=1	12793	20210911_zy_tissue_ethcd_1.2397.2397.3	controllerType=0 controllerNumber=1 scan=2397	10.9797
03357:3	26	R.VN[+2350.830]NTLSSQISR.L	HexNAc(4)Hex(5)Fuc(1)NeuAc(2)	N[+2351]	1190.49	3	3569.47	3569.47	0	-2.1	1106	Specific	262.38	61.66	61.66	5.1	16	>sp|P11047|LAMC1_HUMAN Laminin subunit gamma-1 OS=Homo sapiens OX=9606 GN=LAMC1 PE=1 SV=3	4746	20210911_zy_tissue_ethcd_1.3702.3702.3	controllerType=0 controllerNumber=1 scan=3702	16.8744
01958:3	26	R.VN[+1768.640]NTLSSQISR.L	HexNAc(4)Hex(5)Fuc(1)	N[+1769]	996.43	3	2987.28	2987.28	0	-2.6	1106	Specific	281.4	117.42	117.42	5.21	16	>sp|P11047|LAMC1_HUMAN Laminin subunit gamma-1 OS=Homo sapiens OX=9606 GN=LAMC1 PE=1 SV=3	4746	20210911_zy_tissue_ethcd_1.2167.2167.3	controllerType=0 controllerNumber=1 scan=2167	9.9657
02480:3	26	R.VN[+1913.677]NTLSSQISR.L	HexNAc(4)Hex(5)NeuAc(1)	N[+1914]	1044.78	3	3132.32	3132.32	0	-1.2	1106	Specific	356.69	169.98	169.98	5.75	16	>sp|P11047|LAMC1_HUMAN Laminin subunit gamma-1 OS=Homo sapiens OX=9606 GN=LAMC1 PE=1 SV=3	4746	20210911_zy_tissue_ethcd_1.2740.2740.3	controllerType=0 controllerNumber=1 scan=2740	12.5549
02969:3	26	R.KIPAIN[+1768.640]QTITEANEK.T	HexNAc(4)Hex(5)Fuc(1)	N[+1769]	1146.86	3	3438.55	3438.55	0	-0.1	1390	Specific	200.2	126.37	126.37	3.97	16	>sp|P11047|LAMC1_HUMAN Laminin subunit gamma-1 OS=Homo sapiens OX=9606 GN=LAMC1 PE=1 SV=3	4746	20210911_zy_tissue_ethcd_1.3276.3276.3	controllerType=0 controllerNumber=1 scan=3276	14.9607
02968:3	26	R.KIPAIN[+1809.666]QTITEANEK.T	HexNAc(5)Hex(4)Fuc(1)	N[+1810]	1160.53	3	3479.58	3479.58	0	-0.4	1390	Specific	206.62	114.7	114.7	3.63	16	>sp|P11047|LAMC1_HUMAN Laminin subunit gamma-1 OS=Homo sapiens OX=9606 GN=LAMC1 PE=1 SV=3	4746	20210911_zy_tissue_ethcd_1.3275.3275.3	controllerType=0 controllerNumber=1 scan=3275	14.9561
03986:3	26	R.KIPAIN[+2059.735]QTITEANEK.T	HexNAc(4)Hex(5)Fuc(1)NeuAc(1)	N[+2060]	1243.89	3	3729.64	3729.65	0	-0.9	1390	Specific	229.51	115.81	115.81	5.63	16	>sp|P11047|LAMC1_HUMAN Laminin subunit gamma-1 OS=Homo sapiens OX=9606 GN=LAMC1 PE=1 SV=3	4746	20210911_zy_tissue_ethcd_1.4392.4392.3	controllerType=0 controllerNumber=1 scan=4392	20.005
03920:3	26	R.KIPAIN[+2059.735]QTITEANEK.T	HexNAc(4)Hex(5)Fuc(1)NeuAc(1)	N[+2060]	1243.88	3	3729.64	3729.65	0	-2.5	1390	Specific	255.97	113.16	113.16	6.24	16	>sp|P11047|LAMC1_HUMAN Laminin subunit gamma-1 OS=Homo sapiens OX=9606 GN=LAMC1 PE=1 SV=3	4746	20210911_zy_tissue_ethcd_1.4319.4319.3	controllerType=0 controllerNumber=1 scan=4319	19.6734
02976:3	26	R.KIPAIN[+1971.719]QTITEANEK.T	HexNAc(5)Hex(5)Fuc(1)	N[+1972]	1214.55	3	3641.63	3641.63	0	-0.3	1390	Specific	292.87	201.95	201.95	5.59	16	>sp|P11047|LAMC1_HUMAN Laminin subunit gamma-1 OS=Homo sapiens OX=9606 GN=LAMC1 PE=1 SV=3	4746	20210911_zy_tissue_ethcd_1.3284.3284.3	controllerType=0 controllerNumber=1 scan=3284	14.9949
02996:3	26	R.KIPAIN[+1809.666]QTITEANEK.T	HexNAc(5)Hex(4)Fuc(1)	N[+1810]	1160.53	3	3479.58	3479.58	0	-0.8	1390	Specific	339.3	230.72	230.72	5.53	16	>sp|P11047|LAMC1_HUMAN Laminin subunit gamma-1 OS=Homo sapiens OX=9606 GN=LAMC1 PE=1 SV=3	4746	20210911_zy_tissue_ethcd_1.3306.3306.3	controllerType=0 controllerNumber=1 scan=3306	15.0958
05982:3	27	K.NN[+2350.830]ATVHEQVGGPSLTSDLQAQSK.G	HexNAc(4)Hex(5)Fuc(1)NeuAc(2)	N[+2351]	1578	3	4732	4732	0	-0.6	85	Specific	233.12	98.39	98.39	6.93	9	>sp|P04004|VTNC_HUMAN Vitronectin OS=Homo sapiens OX=9606 GN=VTN PE=1 SV=1	17960	20210911_zy_tissue_ethcd_1.6582.6582.3	controllerType=0 controllerNumber=1 scan=6582	29.7051
06014:4	27	K.NN[+2204.772]ATVHEQVGGPSLTSDLQAQSK.G	HexNAc(4)Hex(5)NeuAc(2)	N[+2205]	1147.24	4	4585.94	4585.94	0	-1.1	85	Specific	458.26	415.26	415.26	8.69	9	>sp|P04004|VTNC_HUMAN Vitronectin OS=Homo sapiens OX=9606 GN=VTN PE=1 SV=1	17960	20210911_zy_tissue_ethcd_1.6617.6617.4	controllerType=0 controllerNumber=1 scan=6617	29.8675
10532:3	27	K.N[+2204.772]GSLFAFR.G	HexNAc(4)Hex(5)NeuAc(2)	N[+2205]	1039.42	3	3116.24	3116.25	0	-2.2	169	Specific	207.53	51.17	51.17	3.12	9	>sp|P04004|VTNC_HUMAN Vitronectin OS=Homo sapiens OX=9606 GN=VTN PE=1 SV=1	17960	20210911_zy_tissue_ethcd_1.11575.11575.3	controllerType=0 controllerNumber=1 scan=11575	52.2294
07577:2	27	K.N[+1710.598]GSLFAFR.G	HexNAc(3)Hex(5)NeuAc(1)	N[+1711]	1311.54	2	2622.07	2622.07	0	0.2	169	Specific	238.29	142.97	142.97	5.1	9	>sp|P04004|VTNC_HUMAN Vitronectin OS=Homo sapiens OX=9606 GN=VTN PE=1 SV=1	17960	20210911_zy_tissue_ethcd_1.8333.8333.2	controllerType=0 controllerNumber=1 scan=8333	37.6235
10533:3	27	K.N[+2204.772]GSLFAFR.G	HexNAc(4)Hex(5)NeuAc(2)	N[+2205]	1039.42	3	3116.24	3116.25	0	-1.5	169	Specific	243.87	77.95	77.95	5.06	9	>sp|P04004|VTNC_HUMAN Vitronectin OS=Homo sapiens OX=9606 GN=VTN PE=1 SV=1	17960	20210911_zy_tissue_ethcd_1.11577.11577.3	controllerType=0 controllerNumber=1 scan=11577	52.2355
10597:3	27	K.N[+2204.772]GSLFAFR.G	HexNAc(4)Hex(5)NeuAc(2)	N[+2205]	1039.42	3	3116.24	3116.25	0	-1.5	169	Specific	293.16	133.13	133.13	5.54	9	>sp|P04004|VTNC_HUMAN Vitronectin OS=Homo sapiens OX=9606 GN=VTN PE=1 SV=1	17960	20210911_zy_tissue_ethcd_1.11647.11647.3	controllerType=0 controllerNumber=1 scan=11647	52.5468
02707:3	30	K.AN[+2391.857]DTSYIR.D	HexNAc(5)Hex(4)Fuc(1)NeuAc(2)	N[+2392]	1111.11	3	3331.3	3331.31	0	-2.2	257	Specific	213.87	83.67	83.67	3.39	14	>sp|P20774|MIME_HUMAN Mimecan OS=Homo sapiens OX=9606 GN=OGN PE=1 SV=1	8071	20210911_zy_tissue_ethcd_1.2989.2989.3	controllerType=0 controllerNumber=1 scan=2989	13.6738
02709:2	30	K.AN[+1694.603]DTSYIR.D	HexNAc(3)Hex(4)Fuc(1)NeuAc(1)	N[+1695]	1317.53	2	2634.05	2634.06	0	-1.6	257	Specific	225.07	103.79	103.79	5.59	14	>sp|P20774|MIME_HUMAN Mimecan OS=Homo sapiens OX=9606 GN=OGN PE=1 SV=1	8071	20210911_zy_tissue_ethcd_1.2991.2991.2	controllerType=0 controllerNumber=1 scan=2991	13.6829
02593:3	30	K.AN[+2391.857]DTSYIR.D	HexNAc(5)Hex(4)Fuc(1)NeuAc(2)	N[+2392]	1111.11	3	3331.3	3331.31	0	-2.8	257	Specific	229.78	99.64	99.64	5.15	14	>sp|P20774|MIME_HUMAN Mimecan OS=Homo sapiens OX=9606 GN=OGN PE=1 SV=1	8071	20210911_zy_tissue_ethcd_1.2864.2864.3	controllerType=0 controllerNumber=1 scan=2864	13.1124
02570:3	30	K.AN[+2350.830]DTSYIR.D	HexNAc(4)Hex(5)Fuc(1)NeuAc(2)	N[+2351]	1097.43	3	3290.27	3290.28	0	-3.8	257	Specific	233.65	99.31	99.31	5	14	>sp|P20774|MIME_HUMAN Mimecan OS=Homo sapiens OX=9606 GN=OGN PE=1 SV=1	8071	20210911_zy_tissue_ethcd_1.2838.2838.3	controllerType=0 controllerNumber=1 scan=2838	12.9957
01588:3	30	K.AN[+2133.772]DTSYIR.D	HexNAc(5)Hex(6)Fuc(1)	N[+2134]	1025.08	3	3073.22	3073.22	0	-2.2	257	Specific	242.88	114.14	114.14	5.41	14	>sp|P20774|MIME_HUMAN Mimecan OS=Homo sapiens OX=9606 GN=OGN PE=1 SV=1	8071	20210911_zy_tissue_ethcd_1.1761.1761.3	controllerType=0 controllerNumber=1 scan=1761	8.1559
02579:3	30	K.AN[+3446.227]DTSYIR.D	HexNAc(7)Hex(8)Fuc(1)NeuAc(2)	N[+3446]	1462.56	3	4385.68	4385.68	0	-0.9	257	Specific	254.79	96.81	96.81	5.26	14	>sp|P20774|MIME_HUMAN Mimecan OS=Homo sapiens OX=9606 GN=OGN PE=1 SV=1	8071	20210911_zy_tissue_ethcd_1.2848.2848.3	controllerType=0 controllerNumber=1 scan=2848	13.0414
02675:3	30	K.AN[+2350.830]DTSYIR.D	HexNAc(4)Hex(5)Fuc(1)NeuAc(2)	N[+2351]	1097.43	3	3290.28	3290.28	0	-1.7	257	Specific	289.6	118.23	118.23	5.49	14	>sp|P20774|MIME_HUMAN Mimecan OS=Homo sapiens OX=9606 GN=OGN PE=1 SV=1	8071	20210911_zy_tissue_ethcd_1.2954.2954.3	controllerType=0 controllerNumber=1 scan=2954	13.5173
02531:3	30	K.AN[+3081.095]DTSYIR.D	HexNAc(6)Hex(7)Fuc(1)NeuAc(2)	N[+3081]	1340.85	3	4020.54	4020.55	0	-1.4	257	Specific	329.55	140.8	140.8	5.54	14	>sp|P20774|MIME_HUMAN Mimecan OS=Homo sapiens OX=9606 GN=OGN PE=1 SV=1	8071	20210911_zy_tissue_ethcd_1.2796.2796.3	controllerType=0 controllerNumber=1 scan=2796	12.804
02470:3	30	K.AN[+3446.227]DTSYIR.D	HexNAc(7)Hex(8)Fuc(1)NeuAc(2)	N[+3446]	1462.56	3	4385.68	4385.68	0	-0.7	257	Specific	342.52	147.14	147.14	5.32	14	>sp|P20774|MIME_HUMAN Mimecan OS=Homo sapiens OX=9606 GN=OGN PE=1 SV=1	8071	20210911_zy_tissue_ethcd_1.2729.2729.3	controllerType=0 controllerNumber=1 scan=2729	12.5066
05205:3	31	R.FSDGLESN[+1864.634]SSTQFEVK.K	HexNAc(2)Hex(9)	N[+1865]	1213.82	3	3639.44	3639.45	0	-1.5	219	Specific	235.03	147.64	147.64	6.01	5	>sp|P0C0L5|CO4B_HUMAN Complement C4-B OS=Homo sapiens OX=9606 GN=C4B PE=1 SV=2	4060	20210911_zy_tissue_ethcd_1.5730.5730.3	controllerType=0 controllerNumber=1 scan=5730	25.9046
06247:3	31	R.GLN[+2204.772]VTLSSTGR.N	HexNAc(4)Hex(5)NeuAc(2)	N[+2205]	1103.79	3	3309.37	3309.37	0	-2.1	1326	Specific	273.91	124.98	124.98	5.69	5	>sp|P0C0L5|CO4B_HUMAN Complement C4-B OS=Homo sapiens OX=9606 GN=C4B PE=1 SV=2	4060	20210911_zy_tissue_ethcd_1.6873.6873.3	controllerType=0 controllerNumber=1 scan=6873	31.0343
04200:3	31	R.GLN[+2059.735]VTLSSTGR.N	HexNAc(4)Hex(5)Fuc(1)NeuAc(1)	N[+2060]	1055.45	3	3164.33	3164.34	0	-1.6	1326	Specific	324.47	143.46	143.46	5.8	5	>sp|P0C0L5|CO4B_HUMAN Complement C4-B OS=Homo sapiens OX=9606 GN=C4B PE=1 SV=2	4060	20210911_zy_tissue_ethcd_1.4627.4627.3	controllerType=0 controllerNumber=1 scan=4627	21.0764
06196:3	31	R.GLN[+2350.830]VTLSSTGR.N	HexNAc(4)Hex(5)Fuc(1)NeuAc(2)	N[+2351]	1152.48	3	3455.43	3455.43	0	-1.4	1326	Specific	354.41	181.36	181.36	5.84	5	>sp|P0C0L5|CO4B_HUMAN Complement C4-B OS=Homo sapiens OX=9606 GN=C4B PE=1 SV=2	4060	20210911_zy_tissue_ethcd_1.6817.6817.3	controllerType=0 controllerNumber=1 scan=6817	30.78
03620:3	32	R.RAN[+2059.735]TSALAVPSPVSNSASAR.H	HexNAc(4)Hex(5)Fuc(1)NeuAc(1)	N[+2060]	1339.26	3	4015.77	4015.76	0	1.2	1346	Specific	233.8	121.17	121.17	6.57	6	>sp|P55268|LAMB2_HUMAN Laminin subunit beta-2 OS=Homo sapiens OX=9606 GN=LAMB2 PE=1 SV=2	7454	20210911_zy_tissue_ethcd_1.3990.3990.3	controllerType=0 controllerNumber=1 scan=3990	18.176
02818:3	32	R.RAN[+1768.640]TSALAVPSPVSNSASAR.H	HexNAc(4)Hex(5)Fuc(1)	N[+1769]	1242.23	3	3724.66	3724.67	0	-0.5	1346	Specific	251.42	143.56	143.56	6.63	6	>sp|P55268|LAMB2_HUMAN Laminin subunit beta-2 OS=Homo sapiens OX=9606 GN=LAMB2 PE=1 SV=2	7454	20210911_zy_tissue_ethcd_1.3111.3111.3	controllerType=0 controllerNumber=1 scan=3111	14.2215
03691:3	32	R.RAN[+2059.735]TSALAVPSPVSNSASAR.H	HexNAc(4)Hex(5)Fuc(1)NeuAc(1)	N[+2060]	1339.26	3	4015.76	4015.76	0	-0.8	1346	Specific	253.91	105.69	105.69	7.32	6	>sp|P55268|LAMB2_HUMAN Laminin subunit beta-2 OS=Homo sapiens OX=9606 GN=LAMB2 PE=1 SV=2	7454	20210911_zy_tissue_ethcd_1.4068.4068.3	controllerType=0 controllerNumber=1 scan=4068	18.526
02806:3	32	R.RAN[+1768.640]TSALAVPSPVSNSASAR.H	HexNAc(4)Hex(5)Fuc(1)	N[+1769]	1242.22	3	3724.66	3724.67	0	-1.8	1346	Specific	257.43	131.46	131.46	7.09	6	>sp|P55268|LAMB2_HUMAN Laminin subunit beta-2 OS=Homo sapiens OX=9606 GN=LAMB2 PE=1 SV=2	7454	20210911_zy_tissue_ethcd_1.3098.3098.3	controllerType=0 controllerNumber=1 scan=3098	14.1654
02817:3	32	R.RAN[+1768.640]TSALAVPSPVSNSASAR.H	HexNAc(4)Hex(5)Fuc(1)	N[+1769]	1242.23	3	3724.66	3724.67	0	-0.5	1346	Specific	263.19	134.96	134.96	6.66	6	>sp|P55268|LAMB2_HUMAN Laminin subunit beta-2 OS=Homo sapiens OX=9606 GN=LAMB2 PE=1 SV=2	7454	20210911_zy_tissue_ethcd_1.3110.3110.3	controllerType=0 controllerNumber=1 scan=3110	14.217
03785:3	32	R.RAN[+2059.735]TSALAVPSPVSNSASAR.H	HexNAc(4)Hex(5)Fuc(1)NeuAc(1)	N[+2060]	1339.26	3	4015.76	4015.76	0	-1	1346	Specific	278.85	147.46	147.46	7.47	6	>sp|P55268|LAMB2_HUMAN Laminin subunit beta-2 OS=Homo sapiens OX=9606 GN=LAMB2 PE=1 SV=2	7454	20210911_zy_tissue_ethcd_1.4171.4171.3	controllerType=0 controllerNumber=1 scan=4171	18.9844
06381:3	33	K.ITDIEN[+1850.693]GSLANIPR.V	HexNAc(6)Hex(3)Fuc(1)	N[+1851]	1121.83	3	3363.49	3363.49	0	-2.5	277	Specific	205.24	147.1	147.1	5.08	5	>sp|Q9BXN1|ASPN_HUMAN Asporin OS=Homo sapiens OX=9606 GN=ASPN PE=1 SV=2	20349	20210911_zy_tissue_ethcd_1.7020.7020.3	controllerType=0 controllerNumber=1 scan=7020	31.6968
08190:3	33	K.ITDIEN[+2424.867]GSLANIPR.V	HexNAc(5)Hex(6)Fuc(1)NeuAc(1)	N[+2425]	1313.23	3	3937.66	3937.67	0	-1.2	277	Specific	337.19	183.03	183.03	6.58	5	>sp|Q9BXN1|ASPN_HUMAN Asporin OS=Homo sapiens OX=9606 GN=ASPN PE=1 SV=2	20349	20210911_zy_tissue_ethcd_1.9006.9006.3	controllerType=0 controllerNumber=1 scan=9006	40.6621
06343:3	33	K.ITDIEN[+1809.666]GSLANIPR.V	HexNAc(5)Hex(4)Fuc(1)	N[+1810]	1108.16	3	3322.46	3322.47	0	-1.7	277	Specific	337.47	230.05	230.05	6.63	5	>sp|Q9BXN1|ASPN_HUMAN Asporin OS=Homo sapiens OX=9606 GN=ASPN PE=1 SV=2	20349	20210911_zy_tissue_ethcd_1.6978.6978.3	controllerType=0 controllerNumber=1 scan=6978	31.5066
09360:3	34	R.VDLEDFEN[+2059.735]NTAYAK.Y	HexNAc(4)Hex(5)Fuc(1)NeuAc(1)	N[+2060]	1230.16	3	3688.48	3688.48	0	-0.8	130	Specific	385.96	234.92	234.92	6.43	5	>sp|P55083|MFAP4_HUMAN Microfibril-associated glycoprotein 4 OS=Homo sapiens OX=9606 GN=MFAP4 PE=1 SV=2	7926	20210911_zy_tissue_ethcd_1.10290.10290.3	controllerType=0 controllerNumber=1 scan=10290	46.4443
13583:3	36	R.ALGFEN[+3210.137]ATQALGR.A	HexNAc(6)Hex(6)Fuc(1)NeuAc(3)	N[+3210]	1519.95	3	4557.83	4557.84	0	-0.9	64	Specific	204.5	49.4	49.4	4.42	9	>sp|Q08380|LG3BP_HUMAN Galectin-3-binding protein OS=Homo sapiens OX=9606 GN=LGALS3BP PE=1 SV=1	4876	20210911_zy_tissue_ethcd_1.14921.14921.3	controllerType=0 controllerNumber=1 scan=14921	67.2203
03294:3	36	K.AAIPSALDTN[+2424.867]SSK.S	HexNAc(5)Hex(6)Fuc(1)NeuAc(1)	N[+2425]	1233.85	3	3699.53	3699.53	0	0	542	Specific	305.39	135.64	135.64	6.06	9	>sp|Q08380|LG3BP_HUMAN Galectin-3-binding protein OS=Homo sapiens OX=9606 GN=LGALS3BP PE=1 SV=1	4876	20210911_zy_tissue_ethcd_1.3633.3633.3	controllerType=0 controllerNumber=1 scan=3633	16.5621
03359:3	36	K.AAIPSALDTN[+2059.735]SSK.S	HexNAc(4)Hex(5)Fuc(1)NeuAc(1)	N[+2060]	1112.13	3	3334.39	3334.39	0	-2.6	542	Specific	341.73	185.88	185.88	6.65	9	>sp|Q08380|LG3BP_HUMAN Galectin-3-binding protein OS=Homo sapiens OX=9606 GN=LGALS3BP PE=1 SV=1	4876	20210911_zy_tissue_ethcd_1.3704.3704.3	controllerType=0 controllerNumber=1 scan=3704	16.884
08532:3	37	R.SWPAVGN[+2204.772]C[+57.021]SSALR.W	HexNAc(4)Hex(5)NeuAc(2)	C[+57], N[+2205]	1203.82	3	3609.44	3609.44	0	-1.5	181	Specific	217.18	83.99	83.99	4.69	2	>sp|P02790|HEMO_HUMAN Hemopexin OS=Homo sapiens OX=9606 GN=HPX PE=1 SV=2	9336	20210911_zy_tissue_ethcd_1.9381.9381.3	controllerType=0 controllerNumber=1 scan=9381	42.335
08491:3	37	R.SWPAVGN[+2204.772]C[+57.021]SSALR.W	HexNAc(4)Hex(5)NeuAc(2)	C[+57], N[+2205]	1203.82	3	3609.44	3609.44	0	-0.7	181	Specific	222.63	77.75	77.75	5.87	2	>sp|P02790|HEMO_HUMAN Hemopexin OS=Homo sapiens OX=9606 GN=HPX PE=1 SV=2	9336	20210911_zy_tissue_ethcd_1.9336.9336.3	controllerType=0 controllerNumber=1 scan=9336	42.1303
08504:3	37	R.SWPAVGN[+2204.772]C[+57.021]SSALR.W	HexNAc(4)Hex(5)NeuAc(2)	C[+57], N[+2205]	1203.82	3	3609.44	3609.44	0	-0.9	181	Specific	316.7	96.21	96.21	6.47	2	>sp|P02790|HEMO_HUMAN Hemopexin OS=Homo sapiens OX=9606 GN=HPX PE=1 SV=2	9336	20210911_zy_tissue_ethcd_1.9350.9350.5	controllerType=0 controllerNumber=1 scan=9350	42.1935
01561:4	37	R.N[+1548.545]GTGHGN[+2861.000]STHHGPEYMR.C	HexNAc(3)Hex(4)NeuAc(1),HexNAc(5)Hex(6)NeuAc(3)	N[+1549][+2861]	1566.09	4	6261.32	6261.34	0	-2.5	240	Specific	261.04	164.66	12.52	7.02	2	>sp|P02790|HEMO_HUMAN Hemopexin OS=Homo sapiens OX=9606 GN=HPX PE=1 SV=2	9336	20210911_zy_tissue_ethcd_1.1732.1732.4	controllerType=0 controllerNumber=1 scan=1732	8.0221
08606:3	38	K.HNN[+1378.476]DTQHIWESDSNEFSVIADPR.G	HexNAc(2)Hex(6)	N[+1378]	1363.56	3	4088.67	4089.68	-1	-1.7	215	Specific	311.69	218.29	218.29	7.48	4	>sp|P14625|ENPL_HUMAN Endoplasmin OS=Homo sapiens OX=9606 GN=HSP90B1 PE=1 SV=1	4461	20210911_zy_tissue_ethcd_1.9462.9462.3	controllerType=0 controllerNumber=1 scan=9462	42.7015
08601:3	38	K.HNN[+1378.476]DTQHIWESDSNEFSVIADPR.G	HexNAc(2)Hex(6)	N[+1378]	1363.9	3	4089.67	4089.68	0	-2.4	215	Specific	368.33	294.64	294.64	7.89	4	>sp|P14625|ENPL_HUMAN Endoplasmin OS=Homo sapiens OX=9606 GN=HSP90B1 PE=1 SV=1	4461	20210911_zy_tissue_ethcd_1.9456.9456.3	controllerType=0 controllerNumber=1 scan=9456	42.6767
01394:3	39	K.RPASN[+1768.640]VSASIQR.I	HexNAc(4)Hex(5)Fuc(1)	N[+1769]	1018.78	3	3054.33	3054.34	0	-1.3	806	Specific	228.69	99.92	99.92	5.17	8	>sp|Q16363|LAMA4_HUMAN Laminin subunit alpha-4 OS=Homo sapiens OX=9606 GN=LAMA4 PE=1 SV=4	9277	20210911_zy_tissue_ethcd_1.1549.1549.3	controllerType=0 controllerNumber=1 scan=1549	7.1984
01477:3	39	K.RPASN[+1971.719]VSASIQR.I	HexNAc(5)Hex(5)Fuc(1)	N[+1972]	1086.47	3	3257.41	3257.42	0	-1.9	806	Specific	232.52	88.52	88.52	5.35	8	>sp|Q16363|LAMA4_HUMAN Laminin subunit alpha-4 OS=Homo sapiens OX=9606 GN=LAMA4 PE=1 SV=4	9277	20210911_zy_tissue_ethcd_1.1640.1640.3	controllerType=0 controllerNumber=1 scan=1640	7.6119
01476:3	39	K.RPASN[+1809.666]VSASIQR.I	HexNAc(5)Hex(4)Fuc(1)	N[+1810]	1032.46	3	3095.36	3095.36	0	-1.6	806	Specific	266.57	129.61	129.61	5.44	8	>sp|Q16363|LAMA4_HUMAN Laminin subunit alpha-4 OS=Homo sapiens OX=9606 GN=LAMA4 PE=1 SV=4	9277	20210911_zy_tissue_ethcd_1.1639.1639.3	controllerType=0 controllerNumber=1 scan=1639	7.6068
01657:3	39	K.RPASN[+2059.735]VSASIQR.I	HexNAc(4)Hex(5)Fuc(1)NeuAc(1)	N[+2060]	1115.81	3	3345.43	3345.43	0	-1.8	806	Specific	341.09	100.5	100.5	5.66	8	>sp|Q16363|LAMA4_HUMAN Laminin subunit alpha-4 OS=Homo sapiens OX=9606 GN=LAMA4 PE=1 SV=4	9277	20210911_zy_tissue_ethcd_1.1837.1837.3	controllerType=0 controllerNumber=1 scan=1837	8.4944
13219:3	40	K.EN[+2204.772]LTAPGSDSAVFFEQGTTR.I	HexNAc(4)Hex(5)NeuAc(2)	N[+2205]	1444.6	3	4331.77	4331.77	0	0	396	Specific	349.12	226.92	226.92	6.71	6	>sp|P00450|CERU_HUMAN Ceruloplasmin OS=Homo sapiens OX=9606 GN=CP PE=1 SV=1	460	20210911_zy_tissue_ethcd_1.14523.14523.3	controllerType=0 controllerNumber=1 scan=14523	65.4574
06207:3	40	K.ELHHLQEQN[+2204.772]VSNAFLDK.G	HexNAc(4)Hex(5)NeuAc(2)	N[+2205]	1409.6	3	4226.78	4226.78	0	0	754	Specific	305.98	157.78	157.78	6.48	6	>sp|P00450|CERU_HUMAN Ceruloplasmin OS=Homo sapiens OX=9606 GN=CP PE=1 SV=1	460	20210911_zy_tissue_ethcd_1.6829.6829.3	controllerType=0 controllerNumber=1 scan=6829	30.8372
02595:3	41	R.MHLN[+2059.735]GSNVQVLHR.T	HexNAc(4)Hex(5)Fuc(1)NeuAc(1)	N[+2060]	1188.84	3	3564.51	3564.52	0	-1.3	3086	Specific	457.1	244.93	244.93	7.29	3	>sp|Q07954|LRP1_HUMAN Prolow-density lipoprotein receptor-related protein 1 OS=Homo sapiens OX=9606 GN=LRP1 PE=1 SV=2	6921	20210911_zy_tissue_ethcd_1.2866.2866.3	controllerType=0 controllerNumber=1 scan=2866	13.1229
04129:3	41	R.GVTHLN[+2059.735]ISGLK.M	HexNAc(4)Hex(5)Fuc(1)NeuAc(1)	N[+2060]	1066.8	3	3198.39	3198.39	0	-1.8	3948	Specific	206.48	83.4	83.4	3.91	3	>sp|Q07954|LRP1_HUMAN Prolow-density lipoprotein receptor-related protein 1 OS=Homo sapiens OX=9606 GN=LRP1 PE=1 SV=2	6921	20210911_zy_tissue_ethcd_1.4549.4549.3	controllerType=0 controllerNumber=1 scan=4549	20.7218
04117:3	41	R.GVTHLN[+2059.735]ISGLK.M	HexNAc(4)Hex(5)Fuc(1)NeuAc(1)	N[+2060]	1066.8	3	3198.39	3198.39	0	-1.1	3948	Specific	221.97	88.71	88.71	5.76	3	>sp|Q07954|LRP1_HUMAN Prolow-density lipoprotein receptor-related protein 1 OS=Homo sapiens OX=9606 GN=LRP1 PE=1 SV=2	6921	20210911_zy_tissue_ethcd_1.4536.4536.3	controllerType=0 controllerNumber=1 scan=4536	20.6628
06582:3	44	R.SFN[+1768.640]QSLHSLTQAIR.N	HexNAc(4)Hex(5)Fuc(1)	N[+1769]	1124.16	3	3370.47	3370.48	0	-3.1	247	Specific	247.32	50.04	50.04	5.61	3	>sp|Q9H8L6|MMRN2_HUMAN Multimerin-2 OS=Homo sapiens OX=9606 GN=MMRN2 PE=1 SV=2	2063	20210911_zy_tissue_ethcd_1.7240.7240.3	controllerType=0 controllerNumber=1 scan=7240	32.6992
08521:3	44	R.SFN[+2059.735]QSLHSLTQAIR.N	HexNAc(4)Hex(5)Fuc(1)NeuAc(1)	N[+2060]	1221.19	3	3661.56	3661.57	0	-3.1	247	Specific	316.77	68.26	68.26	6.36	3	>sp|Q9H8L6|MMRN2_HUMAN Multimerin-2 OS=Homo sapiens OX=9606 GN=MMRN2 PE=1 SV=2	2063	20210911_zy_tissue_ethcd_1.9368.9368.3	controllerType=0 controllerNumber=1 scan=9368	42.2791
08492:3	44	R.SFN[+2059.735]QSLHSLTQAIR.N	HexNAc(4)Hex(5)Fuc(1)NeuAc(1)	N[+2060]	1221.19	3	3661.57	3661.57	0	-1.1	247	Specific	319.24	72.04	72.04	5.98	3	>sp|Q9H8L6|MMRN2_HUMAN Multimerin-2 OS=Homo sapiens OX=9606 GN=MMRN2 PE=1 SV=2	2063	20210911_zy_tissue_ethcd_1.9337.9337.3	controllerType=0 controllerNumber=1 scan=9337	42.1354
08501:3	44	R.SFN[+2059.735]QSLHSLTQAIR.N	HexNAc(4)Hex(5)Fuc(1)NeuAc(1)	N[+2060]	1221.19	3	3661.57	3661.57	0	-1.8	247	Specific	361.32	102.16	102.16	6.96	3	>sp|Q9H8L6|MMRN2_HUMAN Multimerin-2 OS=Homo sapiens OX=9606 GN=MMRN2 PE=1 SV=2	2063	20210911_zy_tissue_ethcd_1.9347.9347.3	controllerType=0 controllerNumber=1 scan=9347	42.1802
04105:3	45	K.TPLTAN[+2350.830]ITK.S	HexNAc(4)Hex(5)Fuc(1)NeuAc(2)	N[+2351]	1103.8	3	3309.38	3309.39	0	-2.4	200	Specific	207.14	80.55	80.55	3.86	7	>sp|P01877|IGHA2_HUMAN Immunoglobulin heavy constant alpha 2 OS=Homo sapiens OX=9606 GN=IGHA2 PE=1 SV=4	10403	20210911_zy_tissue_ethcd_1.4522.4522.3	controllerType=0 controllerNumber=1 scan=4522	20.6024
04169:3	45	K.TPLTAN[+2553.910]ITK.S	HexNAc(5)Hex(5)Fuc(1)NeuAc(2)	N[+2554]	1171.49	3	3512.46	3512.47	0	-1.2	200	Specific	210.3	63.66	63.66	3.56	7	>sp|P01877|IGHA2_HUMAN Immunoglobulin heavy constant alpha 2 OS=Homo sapiens OX=9606 GN=IGHA2 PE=1 SV=4	10403	20210911_zy_tissue_ethcd_1.4593.4593.3	controllerType=0 controllerNumber=1 scan=4593	20.9178
02866:3	45	K.TPLTAN[+2262.814]ITK.S	HexNAc(5)Hex(5)Fuc(1)NeuAc(1)	N[+2263]	1074.46	3	3221.37	3221.37	0	-1.8	200	Specific	302.01	153.76	153.76	6.02	7	>sp|P01877|IGHA2_HUMAN Immunoglobulin heavy constant alpha 2 OS=Homo sapiens OX=9606 GN=IGHA2 PE=1 SV=4	10403	20210911_zy_tissue_ethcd_1.3164.3164.3	controllerType=0 controllerNumber=1 scan=3164	14.4576
02847:3	45	K.TPLTAN[+2059.735]ITK.S	HexNAc(4)Hex(5)Fuc(1)NeuAc(1)	N[+2060]	1006.77	3	3018.29	3018.29	0	-1.4	200	Specific	346.43	188.7	188.7	6.02	7	>sp|P01877|IGHA2_HUMAN Immunoglobulin heavy constant alpha 2 OS=Homo sapiens OX=9606 GN=IGHA2 PE=1 SV=4	10403	20210911_zy_tissue_ethcd_1.3143.3143.3	controllerType=0 controllerNumber=1 scan=3143	14.3638
05511:3	46	K.GELN[+1864.634]TSIFSSRPIDK.F	HexNAc(2)Hex(9)	N[+1865]	1176.84	3	3528.49	3528.5	0	-2	350	Specific	216.02	113.75	113.75	4.2	2	>sp|Q9UHG3|PCYOX_HUMAN Prenylcysteine oxidase 1 OS=Homo sapiens OX=9606 GN=PCYOX1 PE=1 SV=3	9384	20210911_zy_tissue_ethcd_1.6065.6065.3	controllerType=0 controllerNumber=1 scan=6065	27.3612
05514:3	46	K.GELN[+1702.581]TSIFSSRPIDK.F	HexNAc(2)Hex(8)	N[+1703]	1122.82	3	3366.44	3366.45	0	-2.2	350	Specific	362.82	200.08	200.08	6.51	2	>sp|Q9UHG3|PCYOX_HUMAN Prenylcysteine oxidase 1 OS=Homo sapiens OX=9606 GN=PCYOX1 PE=1 SV=3	9384	20210911_zy_tissue_ethcd_1.6068.6068.3	controllerType=0 controllerNumber=1 scan=6068	27.3761
03076:2	47	R.VFGSQN[+1864.634]LTTVK.L	HexNAc(2)Hex(9)	N[+1865]	1529.65	2	3058.28	3058.29	0	-0.9	510	Specific	251.7	148.27	148.27	5.89	9	>sp|Q9Y4L1|HYOU1_HUMAN Hypoxia up-regulated protein 1 OS=Homo sapiens OX=9606 GN=HYOU1 PE=1 SV=1	14756	20210911_zy_tissue_ethcd_1.3394.3394.2	controllerType=0 controllerNumber=1 scan=3394	15.4874
00848:2	47	K.N[+1702.581]ATLAEQAK.L	HexNAc(2)Hex(8)	N[+1703]	1324.54	2	2648.08	2648.08	0	-1.1	869	Specific	351.48	228.97	228.97	6.23	9	>sp|Q9Y4L1|HYOU1_HUMAN Hypoxia up-regulated protein 1 OS=Homo sapiens OX=9606 GN=HYOU1 PE=1 SV=1	14756	20210911_zy_tissue_ethcd_1.949.949.2	controllerType=0 controllerNumber=1 scan=949	4.4316
01129:3	49	K.N[+2059.735]NSDISSTR.G	HexNAc(4)Hex(5)Fuc(1)NeuAc(1)	N[+2060]	1018.4	3	3053.19	3053.19	0	-2.2	46	Specific	292.87	135.14	135.14	6.02	2	>sp|P01871|IGHM_HUMAN Immunoglobulin heavy constant mu OS=Homo sapiens OX=9606 GN=IGHM PE=1 SV=4	10127	20210911_zy_tissue_ethcd_1.1258.1258.3	controllerType=0 controllerNumber=1 scan=1258	5.8695
01191:3	49	K.N[+2262.814]NSDISSTR.G	HexNAc(5)Hex(5)Fuc(1)NeuAc(1)	N[+2263]	1086.09	3	3256.27	3256.27	0	-1.3	46	Specific	311.88	140.45	140.45	5.95	2	>sp|P01871|IGHM_HUMAN Immunoglobulin heavy constant mu OS=Homo sapiens OX=9606 GN=IGHM PE=1 SV=4	10127	20210911_zy_tissue_ethcd_1.1326.1326.3	controllerType=0 controllerNumber=1 scan=1326	6.176
07861:3	51	K.GIFLEHFQVN[+1913.677]QTK.T	HexNAc(4)Hex(5)NeuAc(1)	N[+1914]	1158.84	3	3474.49	3474.49	0	-0.2	855	Specific	239.18	66.76	66.76	6.14	4	>sp|Q86WI1|PKHL1_HUMAN Fibrocystin-L OS=Homo sapiens OX=9606 GN=PKHD1L1 PE=2 SV=2	16882	20210911_zy_tissue_ethcd_1.8645.8645.3	controllerType=0 controllerNumber=1 scan=8645	39.0396
10992:3	51	R.LSLFHSIVALN[+2059.735]K.S	HexNAc(4)Hex(5)Fuc(1)NeuAc(1)	N[+2060]	1134.51	3	3401.51	3401.52	0	-3.7	3815	Specific	259.79	111.88	111.88	5.63	4	>sp|Q86WI1|PKHL1_HUMAN Fibrocystin-L OS=Homo sapiens OX=9606 GN=PKHD1L1 PE=2 SV=2	16882	20210911_zy_tissue_ethcd_1.12080.12080.3	controllerType=0 controllerNumber=1 scan=12080	54.4883
06199:3	54	K.GN[+1872.651]ETIVNLIHSTR.I	HexNAc(3)Hex(6)NeuAc(1)	N[+1873]	1109.48	3	3326.42	3326.43	0	-2.2	138	Specific	340.91	141.84	141.84	5.25	3	>sp|P16870|CBPE_HUMAN Carboxypeptidase E OS=Homo sapiens OX=9606 GN=CPE PE=1 SV=1	11256	20210911_zy_tissue_ethcd_1.6820.6820.3	controllerType=0 controllerNumber=1 scan=6820	30.7955
06206:3	54	K.GN[+1872.651]ETIVNLIHSTR.I	HexNAc(3)Hex(6)NeuAc(1)	N[+1873]	1109.48	3	3326.42	3326.43	0	-2	138	Specific	442.23	213.2	213.2	5.19	3	>sp|P16870|CBPE_HUMAN Carboxypeptidase E OS=Homo sapiens OX=9606 GN=CPE PE=1 SV=1	11256	20210911_zy_tissue_ethcd_1.6828.6828.3	controllerType=0 controllerNumber=1 scan=6828	30.8318
14549:3	55	K.LDAPTNLQFVN[+2204.772]ETDSTVLVR.W	HexNAc(4)Hex(5)NeuAc(2)	N[+2205]	1479.64	3	4436.92	4436.92	0	-0.9	997	Specific	462.96	321.67	321.67	5.62	1	>sp|P02751|FINC_HUMAN Fibronectin OS=Homo sapiens OX=9606 GN=FN1 PE=1 SV=4	5465	20210911_zy_tissue_ethcd_1.15979.15979.3	controllerType=0 controllerNumber=1 scan=15979	71.8821
07667:3	56	R.TTLVDNNTWN[+1864.634]NSHIALVGK.A	HexNAc(2)Hex(9)	N[+1865]	1321.23	3	3961.69	3961.71	0	-5	618	Specific	279.24	199.3	92.52	5.5	2	>sp|Q8TCJ2|STT3B_HUMAN Dolichyl-diphosphooligosaccharide--protein glycosyltransferase subunit STT3B OS=Homo sapiens OX=9606 GN=STT3B PE=1 SV=1	13685	20210911_zy_tissue_ethcd_1.8432.8432.3	controllerType=0 controllerNumber=1 scan=8432	38.0758
00823:4	57	K.SHTN[+1038.375]TSHVMQYGN[+1540.529]K.T	HexNAc(2)Hex(3)Fuc(1),HexNAc(2)Hex(7)	N[+1038][+1541]	1046.41	4	4182.63	4182.63	0	-1.6	260	Specific	267.37	224.89	127.71	5.01	4	>sp|Q99538|LGMN_HUMAN Legumain OS=Homo sapiens OX=9606 GN=LGMN PE=1 SV=1	7471	20210911_zy_tissue_ethcd_1.921.921.4	controllerType=0 controllerNumber=1 scan=921	4.304
03087:3	59	R.IAPASN[+1702.581]VSHTVVLRPLK.A	HexNAc(2)Hex(8)	N[+1703]	1168.89	3	3504.64	3504.65	0	-0.8	83	Specific	216.4	175.57	175.57	2.8	2	>sp|P43308|SSRB_HUMAN Translocon-associated protein subunit beta OS=Homo sapiens OX=9606 GN=SSR2 PE=1 SV=1	13071	20210911_zy_tissue_ethcd_1.3406.3406.3	controllerType=0 controllerNumber=1 scan=3406	15.5425
03066:4	59	R.IAPASN[+1864.634]VSHTVVLRPLK.A	HexNAc(2)Hex(9)	N[+1865]	917.429	4	3666.69	3666.7	0	-1.6	83	Specific	314.81	273.06	273.06	4.74	2	>sp|P43308|SSRB_HUMAN Translocon-associated protein subunit beta OS=Homo sapiens OX=9606 GN=SSR2 PE=1 SV=1	13071	20210911_zy_tissue_ethcd_1.3383.3383.4	controllerType=0 controllerNumber=1 scan=3383	15.4383
02574:3	60	R.RPYVSYVN[+1540.529]NSIAR.N	HexNAc(2)Hex(7)	N[+1541]	1027.12	3	3079.33	3079.34	0	-1.2	741	Specific	331.98	230.13	230.13	5.05	2	>sp|Q9Y2E5|MA2B2_HUMAN Epididymis-specific alpha-mannosidase OS=Homo sapiens OX=9606 GN=MAN2B2 PE=1 SV=4	3554	20210911_zy_tissue_ethcd_1.2843.2843.3	controllerType=0 controllerNumber=1 scan=2843	13.0168
03437:3	61	K.TWSAFQN[+2059.735]GTDR.R	HexNAc(4)Hex(5)Fuc(1)NeuAc(1)	N[+2060]	1114.78	3	3342.31	3342.32	0	-1.3	1490	Specific	245.69	102.2	102.2	3.75	11	>sp|P98164|LRP2_HUMAN Low-density lipoprotein receptor-related protein 2 OS=Homo sapiens OX=9606 GN=LRP2 PE=1 SV=3	10997	20210911_zy_tissue_ethcd_1.3790.3790.3	controllerType=0 controllerNumber=1 scan=3790	17.2867
01446:2	61	K.YN[+1702.581]LSSER.F	HexNAc(2)Hex(8)	N[+1703]	1286	2	2571	2571	0	-0.5	4067	Specific	233.33	91.23	91.23	3.52	11	>sp|P98164|LRP2_HUMAN Low-density lipoprotein receptor-related protein 2 OS=Homo sapiens OX=9606 GN=LRP2 PE=1 SV=3	10997	20210911_zy_tissue_ethcd_1.1606.1606.2	controllerType=0 controllerNumber=1 scan=1606	7.4548
07636:3	62	R.YHYN[+1702.581]GTLLDGTSFDTSYSK.G	HexNAc(2)Hex(8)	N[+1703]	1291.2	3	3871.58	3871.56	0	5.6	179	Specific	229.97	170.82	170.82	4.8	2	>sp|Q96AY3|FKB10_HUMAN Peptidyl-prolyl cis-trans isomerase FKBP10 OS=Homo sapiens OX=9606 GN=FKBP10 PE=1 SV=1	19614	20210911_zy_tissue_ethcd_1.8397.8397.3	controllerType=0 controllerNumber=1 scan=8397	37.919
07648:3	62	R.YHYN[+1702.581]GTLLDGTSFDTSYSK.G	HexNAc(2)Hex(8)	N[+1703]	1291.19	3	3871.56	3871.56	0	1.2	179	Specific	237.89	192.14	192.14	4.87	2	>sp|Q96AY3|FKB10_HUMAN Peptidyl-prolyl cis-trans isomerase FKBP10 OS=Homo sapiens OX=9606 GN=FKBP10 PE=1 SV=1	19614	20210911_zy_tissue_ethcd_1.8411.8411.3	controllerType=0 controllerNumber=1 scan=8411	37.9804
08716:3	63	K.DIVEYYNDSN[+2204.772]GSHVLQGR.F	HexNAc(4)Hex(5)NeuAc(2)	N[+2205]	1424.24	3	4270.72	4270.73	0	-2.2	103	Specific	228.68	66.94	43.24	4.54	1	>sp|P25311|ZA2G_HUMAN Zinc-alpha-2-glycoprotein OS=Homo sapiens OX=9606 GN=AZGP1 PE=1 SV=2	18783	20210911_zy_tissue_ethcd_1.9583.9583.3	controllerType=0 controllerNumber=1 scan=9583	43.2431
08698:3	63	K.DIVEYYNDSN[+2204.772]GSHVLQGR.F	HexNAc(4)Hex(5)NeuAc(2)	N[+2205]	1423.91	3	4269.72	4270.73	-1	-2.6	103	Specific	266	112.58	63	4.81	1	>sp|P25311|ZA2G_HUMAN Zinc-alpha-2-glycoprotein OS=Homo sapiens OX=9606 GN=AZGP1 PE=1 SV=2	18783	20210911_zy_tissue_ethcd_1.9563.9563.3	controllerType=0 controllerNumber=1 scan=9563	43.1511
03816:3	64	R.GGSSGWSGGLAQN[+2204.772]R.S	HexNAc(4)Hex(5)NeuAc(2)	N[+2205]	1180.13	3	3538.39	3538.4	0	-2.2	425	Specific	275.26	120.68	120.68	4.81	1	>sp|P07357|CO8A_HUMAN Complement component C8 alpha chain OS=Homo sapiens OX=9606 GN=C8A PE=1 SV=2	5176	20210911_zy_tissue_ethcd_1.4205.4205.3	controllerType=0 controllerNumber=1 scan=4205	19.1418
02563:3	65	R.RGDLNIN[+1216.423]MTSPM[+15.995]GTK.S	HexNAc(2)Hex(5)	M[+16], N[+1216]	956.409	3	2867.21	2867.22	0	-1.9	518	Specific	290.44	155.32	75.49	4.58	1	>sp|P16519|NEC2_HUMAN Neuroendocrine convertase 2 OS=Homo sapiens OX=9606 GN=PCSK2 PE=1 SV=2	12480	20210911_zy_tissue_ethcd_1.2831.2831.3	controllerType=0 controllerNumber=1 scan=2831	12.9616
01317:3	66	R.NEEYN[+2204.772]K.S	HexNAc(4)Hex(5)NeuAc(2)	N[+2205]	1001.04	3	3001.12	3001.12	0	-1.5	52	Specific	223.94	90.81	90.81	3.56	7	>sp|P02763|A1AG1_HUMAN Alpha-1-acid glycoprotein 1 OS=Homo sapiens OX=9606 GN=ORM1 PE=1 SV=1	2208	20210911_zy_tissue_ethcd_1.1464.1464.3	controllerType=0 controllerNumber=1 scan=1464	6.8113
01838:3	66	R.NEEYN[+2861.000]K.S	HexNAc(5)Hex(6)NeuAc(3)	N[+2861]	1219.79	3	3657.34	3657.35	0	-0.7	52	Specific	272.92	76.85	76.85	3.03	7	>sp|P02763|A1AG1_HUMAN Alpha-1-acid glycoprotein 1 OS=Homo sapiens OX=9606 GN=ORM1 PE=1 SV=1	2208	20210911_zy_tissue_ethcd_1.2035.2035.3	controllerType=0 controllerNumber=1 scan=2035	9.3697
01975:3	66	R.EN[+2861.000]GTISR.Y	HexNAc(5)Hex(6)NeuAc(3)	N[+2861]	1213.13	3	3637.39	3637.39	0	-0.3	102	Specific	200.47	15.91	15.91	0.75	7	>sp|P02763|A1AG1_HUMAN Alpha-1-acid glycoprotein 1 OS=Homo sapiens OX=9606 GN=ORM1 PE=1 SV=1	2208	20210911_zy_tissue_ethcd_1.2185.2185.3	controllerType=0 controllerNumber=1 scan=2185	10.047
01499:3	66	R.EN[+2204.772]GTISR.Y	HexNAc(4)Hex(5)NeuAc(2)	N[+2205]	994.39	3	2981.16	2981.16	0	-2	102	Specific	233.51	32.2	32.2	2.37	7	>sp|P02763|A1AG1_HUMAN Alpha-1-acid glycoprotein 1 OS=Homo sapiens OX=9606 GN=ORM1 PE=1 SV=1	2208	20210911_zy_tissue_ethcd_1.1664.1664.3	controllerType=0 controllerNumber=1 scan=1664	7.7216
02921:3	66	R.EN[+3517.228]GTISR.Y	HexNAc(6)Hex(7)NeuAc(4)	N[+3517]	1431.88	3	4293.62	4293.62	0	0	102	Specific	239.96	31.52	31.52	1.75	7	>sp|P02763|A1AG1_HUMAN Alpha-1-acid glycoprotein 1 OS=Homo sapiens OX=9606 GN=ORM1 PE=1 SV=1	2208	20210911_zy_tissue_ethcd_1.3224.3224.3	controllerType=0 controllerNumber=1 scan=3224	14.7285
01968:3	66	R.EN[+3007.058]GTISR.Y	HexNAc(5)Hex(6)Fuc(1)NeuAc(3)	N[+3007]	1261.82	3	3783.45	3783.45	0	-0.3	102	Specific	255.07	30.57	30.57	2.02	7	>sp|P02763|A1AG1_HUMAN Alpha-1-acid glycoprotein 1 OS=Homo sapiens OX=9606 GN=ORM1 PE=1 SV=1	2208	20210911_zy_tissue_ethcd_1.2178.2178.3	controllerType=0 controllerNumber=1 scan=2178	10.0151
04578:3	67	R.GHTLTLN[+1872.651]FTR.N	HexNAc(3)Hex(6)NeuAc(1)	N[+1873]	1011.43	3	3032.27	3032.27	0	-2.3	97	Specific	424.18	174.91	174.91	4.15	14	>sp|P11279|LAMP1_HUMAN Lysosome-associated membrane glycoprotein 1 OS=Homo sapiens OX=9606 GN=LAMP1 PE=1 SV=3	4405	20210911_zy_tissue_ethcd_1.5041.5041.3	controllerType=0 controllerNumber=1 scan=5041	22.9347
03035:3	67	R.LLNINPN[+2789.999]K.T	HexNAc(6)Hex(7)Fuc(1)NeuAc(1)	N[+2790]	1239.19	3	3715.55	3715.55	0	-0.2	255	Specific	201.97	67.72	67.72	1.17	14	>sp|P11279|LAMP1_HUMAN Lysosome-associated membrane glycoprotein 1 OS=Homo sapiens OX=9606 GN=LAMP1 PE=1 SV=3	4405	20210911_zy_tissue_ethcd_1.3349.3349.3	controllerType=0 controllerNumber=1 scan=3349	15.2867
03596:3	68	R.LHVGNYN[+2059.735]GTAGDALR.F	HexNAc(4)Hex(5)Fuc(1)NeuAc(1)	N[+2060]	1206.51	3	3617.51	3617.51	0	-1.8	330	Specific	273.98	98.47	98.47	4.13	1	>sp|Q14314|FGL2_HUMAN Fibroleukin OS=Homo sapiens OX=9606 GN=FGL2 PE=1 SV=1	4564	20210911_zy_tissue_ethcd_1.3964.3964.3	controllerType=0 controllerNumber=1 scan=3964	18.059
01571:3	69	R.GHVN[+2204.772]ITR.S	HexNAc(4)Hex(5)NeuAc(2)	N[+2205]	1001.07	3	3001.21	3001.21	0	-2.2	118	Specific	215.17	59.08	59.08	1.46	3	>sp|P00734|THRB_HUMAN Prothrombin OS=Homo sapiens OX=9606 GN=F2 PE=1 SV=2	18404	20210911_zy_tissue_ethcd_1.1743.1743.3	controllerType=0 controllerNumber=1 scan=1743	8.0716
10285:3	69	K.N[+2204.772]FTENDLLVR.I	HexNAc(4)Hex(5)NeuAc(2)	N[+2205]	1142.47	3	3425.4	3425.4	0	-1.2	416	Specific	301.01	144.74	144.74	3.89	3	>sp|P00734|THRB_HUMAN Prothrombin OS=Homo sapiens OX=9606 GN=F2 PE=1 SV=2	18404	20210911_zy_tissue_ethcd_1.11305.11305.3	controllerType=0 controllerNumber=1 scan=11305	51.0122
04048:3	70	K.GRDIYTFDGALN[+1581.555]K.S	HexNAc(3)Hex(6)	N[+1582]	1017.77	3	3051.28	3051.29	0	-3.5	62	Specific	328.36	214.79	214.79	3.74	1	>sp|Q08722|CD47_HUMAN Leukocyte surface antigen CD47 OS=Homo sapiens OX=9606 GN=CD47 PE=1 SV=1	886	20210911_zy_tissue_ethcd_1.4460.4460.3	controllerType=0 controllerNumber=1 scan=4460	20.3201
09052:3	71	R.YFYLQAVNSEGQN[+1864.634]LTR.S	HexNAc(2)Hex(9)	N[+1865]	1256.53	3	3767.56	3767.57	0	-1.2	49	Specific	254.54	217.54	217.54	3.45	2	>sp|Q7Z4H8|PLGT3_HUMAN Protein O-glucosyltransferase 3 OS=Homo sapiens OX=9606 GN=POGLUT3 PE=1 SV=2	10867	20210911_zy_tissue_ethcd_1.9952.9952.3	controllerType=0 controllerNumber=1 scan=9952	44.9155
05909:3	72	R.SAN[+1702.581]STLAQALHWTR.S	HexNAc(2)Hex(8)	N[+1703]	1086.79	3	3258.36	3258.38	0	-5	614	Specific	242.86	77.94	77.94	3.34	2	>sp|Q9BU23|LMF2_HUMAN Lipase maturation factor 2 OS=Homo sapiens OX=9606 GN=LMF2 PE=1 SV=2	7424	20210911_zy_tissue_ethcd_1.6501.6501.3	controllerType=0 controllerNumber=1 scan=6501	29.3347
01363:3	73	K.KLN[+1622.582]YTLSQGHR.V	HexNAc(4)Hex(5)	N[+1623]	980.432	3	2939.28	2939.29	0	-2.1	126	Specific	274.45	126.25	126.25	3.32	3	>sp|P15144|AMPN_HUMAN Aminopeptidase N OS=Homo sapiens OX=9606 GN=ANPEP PE=1 SV=4	1209	20210911_zy_tissue_ethcd_1.1515.1515.3	controllerType=0 controllerNumber=1 scan=1515	7.0462
02846:3	74	R.RN[+2059.735]FTAADWGQSR.D	HexNAc(4)Hex(5)Fuc(1)NeuAc(1)	N[+2060]	1156.81	3	3468.4	3468.41	0	-1.6	211	Specific	248.1	2.08	2.08	1.34	4	>sp|P12109|CO6A1_HUMAN Collagen alpha-1(VI) chain OS=Homo sapiens OX=9606 GN=COL6A1 PE=1 SV=3	962	20210911_zy_tissue_ethcd_1.3142.3142.3	controllerType=0 controllerNumber=1 scan=3142	14.3593
04515:3	74	R.N[+2059.735]FTAADWGQSR.D	HexNAc(4)Hex(5)Fuc(1)NeuAc(1)	N[+2060]	1104.77	3	3312.3	3312.31	0	-1	212	Specific	249.99	106.73	106.73	3.14	4	>sp|P12109|CO6A1_HUMAN Collagen alpha-1(VI) chain OS=Homo sapiens OX=9606 GN=COL6A1 PE=1 SV=3	962	20210911_zy_tissue_ethcd_1.4972.4972.3	controllerType=0 controllerNumber=1 scan=4972	22.6278
12165:3	75	R.TQN[+1913.677]FTLLVQGSPELK.T	HexNAc(4)Hex(5)NeuAc(1)	N[+1914]	1196.87	3	3588.58	3588.58	0	-0.6	437	Specific	271.18	134.56	134.56	3.29	1	>sp|P50895|BCAM_HUMAN Basal cell adhesion molecule OS=Homo sapiens OX=9606 GN=BCAM PE=1 SV=2	733	20210911_zy_tissue_ethcd_1.13367.13367.3	controllerType=0 controllerNumber=1 scan=13367	60.2773
01284:3	76	K.TKPREEQYN[+1768.640]STFR.V	HexNAc(4)Hex(5)Fuc(1)	N[+1769]	1142.15	3	3424.44	3424.45	0	-4.3	219	Specific	233.6	58.45	58.45	2.81	7	>sp|P01860|IGHG3_HUMAN Immunoglobulin heavy constant gamma 3 OS=Homo sapiens OX=9606 GN=IGHG3 PE=1 SV=2	2742	20210911_zy_tissue_ethcd_1.1428.1428.3	controllerType=0 controllerNumber=1 scan=1428	6.6502
01583:3	76	K.PREEQYN[+1606.587]STFR.V	HexNAc(4)Hex(4)Fuc(1)	N[+1607]	1011.76	3	3033.25	3033.26	0	-2	221	Specific	251.08	30.88	30.88	1.62	7	>sp|P01860|IGHG3_HUMAN Immunoglobulin heavy constant gamma 3 OS=Homo sapiens OX=9606 GN=IGHG3 PE=1 SV=2	2742	20210911_zy_tissue_ethcd_1.1756.1756.3	controllerType=0 controllerNumber=1 scan=1756	8.1313
01916:3	76	K.PREEQYN[+1751.624]STFR.V	HexNAc(4)Hex(4)NeuAc(1)	N[+1752]	1060.1	3	3178.29	3178.3	0	-0.8	221	Specific	278.94	50.77	50.77	1.59	7	>sp|P01860|IGHG3_HUMAN Immunoglobulin heavy constant gamma 3 OS=Homo sapiens OX=9606 GN=IGHG3 PE=1 SV=2	2742	20210911_zy_tissue_ethcd_1.2120.2120.3	controllerType=0 controllerNumber=1 scan=2120	9.7534
01293:2	77	K.N[+1864.634]YTADYDK.A	HexNAc(2)Hex(9)	N[+1865]	1427.53	2	2854.05	2854.06	0	-1	106	Specific	276.46	210.24	210.24	3.24	2	>sp|O94905|ERLN2_HUMAN Erlin-2 OS=Homo sapiens OX=9606 GN=ERLIN2 PE=1 SV=1	5719	20210911_zy_tissue_ethcd_1.1438.1438.2	controllerType=0 controllerNumber=1 scan=1438	6.6939
03079:3	78	R.LYLDHNN[+2059.735]LTR.M	HexNAc(4)Hex(5)Fuc(1)NeuAc(1)	N[+2060]	1106.8	3	3318.38	3318.39	0	-2.6	160	Specific	256.89	62.74	62.74	3.15	2	>sp|Q06828|FMOD_HUMAN Fibromodulin OS=Homo sapiens OX=9606 GN=FMOD PE=1 SV=2	1228	20210911_zy_tissue_ethcd_1.3397.3397.3	controllerType=0 controllerNumber=1 scan=3397	15.5032
01069:2	79	R.N[+1702.581]VTWK.L	HexNAc(2)Hex(8)	N[+1703]	1175.47	2	2349.93	2349.93	0	-1.4	125	Specific	311.72	125.1	125.1	3.22	6	>sp|P50454|SERPH_HUMAN Serpin H1 OS=Homo sapiens OX=9606 GN=SERPINH1 PE=1 SV=2	16343	20210911_zy_tissue_ethcd_1.1192.1192.2	controllerType=0 controllerNumber=1 scan=1192	5.5685
01417:3	81	K.SQNRPQGQSTQPSNAAGTN[+203.079]TTSASTPR.S	HexNAc(1)	N[+203]	983.126	3	2947.36	2947.37	0	-3.4	104	Specific	321.93	264.53	264.53	3.2	1	>sp|Q9UHD9|UBQL2_HUMAN Ubiquilin-2 OS=Homo sapiens OX=9606 GN=UBQLN2 PE=1 SV=2	18505	20210911_zy_tissue_ethcd_1.1574.1574.3	controllerType=0 controllerNumber=1 scan=1574	7.3186
07096:3	82	K.HAN[+2204.772]WTLTPLK.S	HexNAc(4)Hex(5)NeuAc(2)	N[+2205]	1129.15	3	3385.42	3385.42	0	1	251	Specific	202.01	83.11	83.11	0.84	1	>sp|P27169|PON1_HUMAN Serum paraoxonase/arylesterase 1 OS=Homo sapiens OX=9606 GN=PON1 PE=1 SV=3	15463	20210911_zy_tissue_ethcd_1.7805.7805.3	controllerType=0 controllerNumber=1 scan=7805	35.2593
07105:3	82	K.HAN[+2204.772]WTLTPLK.S	HexNAc(4)Hex(5)NeuAc(2)	N[+2205]	1129.14	3	3385.42	3385.42	0	-0.1	251	Specific	239.86	129.22	129.22	3.13	1	>sp|P27169|PON1_HUMAN Serum paraoxonase/arylesterase 1 OS=Homo sapiens OX=9606 GN=PON1 PE=1 SV=3	15463	20210911_zy_tissue_ethcd_1.7815.7815.3	controllerType=0 controllerNumber=1 scan=7815	35.3036
02167:3	84	K.NSNLQHIN[+1378.476]FTR.N	HexNAc(2)Hex(6)	N[+1378]	908.056	3	2722.15	2722.16	0	-1.6	114	Specific	270.78	158.1	158.1	3.03	1	>sp|Q16620|NTRK2_HUMAN BDNF/NT-3 growth factors receptor OS=Homo sapiens OX=9606 GN=NTRK2 PE=1 SV=1	10308	20210911_zy_tissue_ethcd_1.2396.2396.3	controllerType=0 controllerNumber=1 scan=2396	10.9752
02164:3	84	K.NSNLQHIN[+1378.476]FTR.N	HexNAc(2)Hex(6)	N[+1378]	908.056	3	2722.15	2722.16	0	-1.8	114	Specific	281.62	172.71	172.71	2.88	1	>sp|Q16620|NTRK2_HUMAN BDNF/NT-3 growth factors receptor OS=Homo sapiens OX=9606 GN=NTRK2 PE=1 SV=1	10308	20210911_zy_tissue_ethcd_1.2392.2392.5	controllerType=0 controllerNumber=1 scan=2392	10.9601
04664:3	87	R.QAIHVGN[+1378.476]QTFNDGTIVEK.Y	HexNAc(2)Hex(6)	N[+1378]	1117.16	3	3349.47	3349.47	0	0.4	340	Specific	200.23	147.52	147.52	1.58	4	>sp|Q9H3G5|CPVL_HUMAN Probable serine carboxypeptidase CPVL OS=Homo sapiens OX=9606 GN=CPVL PE=1 SV=2	298	20210911_zy_tissue_ethcd_1.5135.5135.3	controllerType=0 controllerNumber=1 scan=5135	23.3629
04082:2	100	R.N[+1702.581]VSTNVFFK.Q	HexNAc(2)Hex(8)	N[+1703]	1379.57	2	2758.13	2758.13	0	-0.6	337	Specific	215.99	134.01	134.01	1.98	1	>sp|Q6YHK3|CD109_HUMAN CD109 antigen OS=Homo sapiens OX=9606 GN=CD109 PE=1 SV=2	8627	20210911_zy_tissue_ethcd_1.4497.4497.2	controllerType=0 controllerNumber=1 scan=4497	20.4869
02300:3	105	K.N[+2100.761]VTLHVPSK.L	HexNAc(5)Hex(4)Fuc(1)NeuAc(1)	N[+2101]	1032.45	3	3095.32	3095.33	0	-1.6	34	Specific	216.06	87.91	87.91	1.55	2	>sp|Q02487|DSC2_HUMAN Desmocollin-2 OS=Homo sapiens OX=9606 GN=DSC2 PE=1 SV=1	3025	20210911_zy_tissue_ethcd_1.2542.2542.3	controllerType=0 controllerNumber=1 scan=2542	11.6465
06065:3	119	K.YGIRIDN[+1872.651]LSR.T	HexNAc(3)Hex(6)NeuAc(1)	N[+1873]	1027.11	3	3079.31	3079.31	0	-1.2	295	Specific	236.69	40.86	40.86	1.25	1	>sp|Q13393|PLD1_HUMAN Phospholipase D1 OS=Homo sapiens OX=9606 GN=PLD1 PE=1 SV=1	12361	20210911_zy_tissue_ethcd_1.6673.6673.3	controllerType=0 controllerNumber=1 scan=6673	30.1262
03181:3	120	K.EQYTIIN[+1872.651]R.T	HexNAc(3)Hex(6)NeuAc(1)	N[+1873]	970.401	3	2909.19	2909.19	0	-1.6	77	Specific	217.29	62.2	62.2	0.76	2	>sp|P40189|IL6RB_HUMAN Interleukin-6 receptor subunit beta OS=Homo sapiens OX=9606 GN=IL6ST PE=1 SV=2	17457	20210911_zy_tissue_ethcd_1.3509.3509.3	controllerType=0 controllerNumber=1 scan=3509	16.0018
04148:3	142	K.LAN[+1872.651]GTSSM[+15.995]IVPK.Q	HexNAc(3)Hex(6)NeuAc(1)	M[+16], N[+1873]	1036.11	3	3106.3	3106.3	0	0.1	111	Specific	206.68	4.5	4.5	0.06	2	>sp|Q9Y297|FBW1A_HUMAN F-box/WD repeat-containing protein 1A OS=Homo sapiens OX=9606 GN=BTRC PE=1 SV=1	1689	20210911_zy_tissue_ethcd_1.4570.4570.3	controllerType=0 controllerNumber=1 scan=4570	20.8162
03136:3	142	K.LAN[+1872.651]GTSSMIVPKQR.K	HexNAc(3)Hex(6)NeuAc(1)	N[+1873]	1125.49	3	3374.47	3374.47	0	0.4	111	Specific	234.86	42.14	42.14	0.96	2	>sp|Q9Y297|FBW1A_HUMAN F-box/WD repeat-containing protein 1A OS=Homo sapiens OX=9606 GN=BTRC PE=1 SV=1	1689	20210911_zy_tissue_ethcd_1.3460.3460.3	controllerType=0 controllerNumber=1 scan=3460	15.7846
14131:3	145	K.FTGTLFWRN[+2141.788]TSFPLDADK.I	HexNAc(6)Hex(3)Fuc(1)NeuAc(1)	N[+2142]	1419.95	3	4257.83	4257.84	0	-2	275	Specific	218.93	72.73	72.73	0.94	3	>sp|O43520|AT8B1_HUMAN Phospholipid-transporting ATPase IC OS=Homo sapiens OX=9606 GN=ATP8B1 PE=1 SV=3	9014	20210911_zy_tissue_ethcd_1.15521.15521.3	controllerType=0 controllerNumber=1 scan=15521	69.8647

## Sheet: EThcD-R2
Query #:z	Protein Rank	Peptide < ProteinMetrics Confidential >	Glycans NHFAGNa	Modification Type(s)	Observed m/z	z	Observed (M+H)	Calc. mass (M+H)	Off-by-x error	Mass error (ppm)	Starting position	Cleavage	Score	Delta	Delta Mod	|Log Prob|	# of unique peptides	Protein Name	Protein DB number	Comment	Scan #	Scan Time
11348:3	1	K.FVN[+2018.708]TTDMMIFDLVHSYNR.F	HexNAc(3)Hex(6)Fuc(1)NeuAc(1)	N[+2019]	1408.25	3	4222.73	4221.74	1	-2.8	196	Specific	211.63	93.31	93.31	4.17	176	>sp|P01266|THYG_HUMAN Thyroglobulin OS=Homo sapiens OX=9606 GN=TG PE=1 SV=5	17152	20210911_zy_tissue_ethcd_2.12469.12469.3	controllerType=0 controllerNumber=1 scan=12469	56.3929
11486:3	1	K.FVN[+2018.708]TTDMMIFDLVHSYNR.F	HexNAc(3)Hex(6)Fuc(1)NeuAc(1)	N[+2019]	1408.25	3	4222.74	4221.74	1	-1.4	196	Specific	286.25	176.93	176.93	5.91	176	>sp|P01266|THYG_HUMAN Thyroglobulin OS=Homo sapiens OX=9606 GN=TG PE=1 SV=5	17152	20210911_zy_tissue_ethcd_2.12620.12620.3	controllerType=0 controllerNumber=1 scan=12620	57.065
11453:3	1	K.FVN[+2018.708]TTDMMIFDLVHSYNR.F	HexNAc(3)Hex(6)Fuc(1)NeuAc(1)	N[+2019]	1408.25	3	4222.74	4221.74	1	-0.7	196	Specific	346.26	203.19	203.19	6.13	176	>sp|P01266|THYG_HUMAN Thyroglobulin OS=Homo sapiens OX=9606 GN=TG PE=1 SV=5	17152	20210911_zy_tissue_ethcd_2.12584.12584.3	controllerType=0 controllerNumber=1 scan=12584	56.9065
13916:3	1	K.FVN[+2221.788]TTDMM[+15.995]IFDLVHSYNR.F	HexNAc(4)Hex(6)Fuc(1)NeuAc(1)	M[+16], N[+2222]	1480.6	3	4439.79	4440.81	-1	-4	196	Specific	367.74	232.28	18.46	6.06	176	>sp|P01266|THYG_HUMAN Thyroglobulin OS=Homo sapiens OX=9606 GN=TG PE=1 SV=5	17152	20210911_zy_tissue_ethcd_2.15285.15285.3	controllerType=0 controllerNumber=1 scan=15285	68.9684
07079:3	1	K.PLSVGLDSN[+2553.910]SSTGTPEAAK.K	HexNAc(5)Hex(5)Fuc(1)NeuAc(2)	N[+2554]	1462.28	3	4384.83	4384.82	0	1.8	521	Specific	200.28	119.82	119.82	3.98	176	>sp|P01266|THYG_HUMAN Thyroglobulin OS=Homo sapiens OX=9606 GN=TG PE=1 SV=5	17152	20210911_zy_tissue_ethcd_2.7784.7784.3	controllerType=0 controllerNumber=1 scan=7784	35.2187
06663:4	1	K.PLSVGLDSN[+2350.830]SSTGTPEAAK.K	HexNAc(4)Hex(5)Fuc(1)NeuAc(2)	N[+2351]	1046.19	4	4181.73	4181.74	0	-1.2	521	Specific	202.43	142.71	142.71	4.17	176	>sp|P01266|THYG_HUMAN Thyroglobulin OS=Homo sapiens OX=9606 GN=TG PE=1 SV=5	17152	20210911_zy_tissue_ethcd_2.7327.7327.4	controllerType=0 controllerNumber=1 scan=7327	33.1608
08651:3	1	K.PLSVGLDSN[+3007.058]SSTGTPEAAK.K	HexNAc(5)Hex(6)Fuc(1)NeuAc(3)	N[+3007]	1613.66	3	4838.95	4837.97	1	-3.2	521	Specific	204.34	103.59	2.23	4.33	176	>sp|P01266|THYG_HUMAN Thyroglobulin OS=Homo sapiens OX=9606 GN=TG PE=1 SV=5	17152	20210911_zy_tissue_ethcd_2.9509.9509.3	controllerType=0 controllerNumber=1 scan=9509	43.0173
08828:3	1	K.PLSVGLDSN[+3226.132]SSTGTPEAAK.K	HexNAc(6)Hex(7)NeuAc(3)	N[+3226]	1686.7	3	5058.07	5057.04	1	5.6	521	Specific	205.22	99.23	99.23	4	176	>sp|P01266|THYG_HUMAN Thyroglobulin OS=Homo sapiens OX=9606 GN=TG PE=1 SV=5	17152	20210911_zy_tissue_ethcd_2.9704.9704.3	controllerType=0 controllerNumber=1 scan=9704	43.9006
05239:3	1	K.PLSVGLDSN[+2262.814]SSTGTPEAAK.K	HexNAc(5)Hex(5)Fuc(1)NeuAc(1)	N[+2263]	1364.91	3	4092.72	4093.72	-1	1.1	521	Specific	205.98	70.88	70.88	3.92	176	>sp|P01266|THYG_HUMAN Thyroglobulin OS=Homo sapiens OX=9606 GN=TG PE=1 SV=5	17152	20210911_zy_tissue_ethcd_2.5764.5764.3	controllerType=0 controllerNumber=1 scan=5764	26.0768
06790:3	1	K.PLSVGLDSN[+2350.830]SSTGTPEAAK.K	HexNAc(4)Hex(5)Fuc(1)NeuAc(2)	N[+2351]	1394.58	3	4181.74	4181.74	0	-0.1	521	Specific	206.95	120.33	120.33	4.39	176	>sp|P01266|THYG_HUMAN Thyroglobulin OS=Homo sapiens OX=9606 GN=TG PE=1 SV=5	17152	20210911_zy_tissue_ethcd_2.7467.7467.2	controllerType=0 controllerNumber=1 scan=7467	33.7877
06891:3	1	K.PLSVGLDSN[+2553.910]SSTGTPEAAK.K	HexNAc(5)Hex(5)Fuc(1)NeuAc(2)	N[+2554]	1462.28	3	4384.81	4384.82	0	-1.3	521	Specific	209.17	116.58	116.58	4.71	176	>sp|P01266|THYG_HUMAN Thyroglobulin OS=Homo sapiens OX=9606 GN=TG PE=1 SV=5	17152	20210911_zy_tissue_ethcd_2.7578.7578.3	controllerType=0 controllerNumber=1 scan=7578	34.2948
08818:3	1	K.PLSVGLDSN[+3226.132]SSTGTPEAAK.K	HexNAc(6)Hex(7)NeuAc(3)	N[+3226]	1686.69	3	5058.07	5057.04	1	5.2	521	Specific	219.39	137.97	137.97	3.57	176	>sp|P01266|THYG_HUMAN Thyroglobulin OS=Homo sapiens OX=9606 GN=TG PE=1 SV=5	17152	20210911_zy_tissue_ethcd_2.9693.9693.3	controllerType=0 controllerNumber=1 scan=9693	43.8516
03642:3	1	K.PLSVGLDSN[+2133.772]SSTGTPEAAK.K	HexNAc(5)Hex(6)Fuc(1)	N[+2134]	1322.23	3	3964.67	3964.68	0	-3.5	521	Specific	223.3	122.69	122.69	5.86	176	>sp|P01266|THYG_HUMAN Thyroglobulin OS=Homo sapiens OX=9606 GN=TG PE=1 SV=5	17152	20210911_zy_tissue_ethcd_2.4011.4011.3	controllerType=0 controllerNumber=1 scan=4011	18.3445
06598:4	1	K.PLSVGLDSN[+3284.174]SSTGTPEAAK.K	HexNAc(7)Hex(7)Fuc(1)NeuAc(2)	N[+3284]	1279.28	4	5114.08	5115.08	-1	-0.1	521	Specific	224.88	142.73	142.73	6.08	176	>sp|P01266|THYG_HUMAN Thyroglobulin OS=Homo sapiens OX=9606 GN=TG PE=1 SV=5	17152	20210911_zy_tissue_ethcd_2.7256.7256.4	controllerType=0 controllerNumber=1 scan=7256	32.8366
08923:3	1	K.PLSVGLDSN[+3007.058]SSTGTPEAAK.K	HexNAc(5)Hex(6)Fuc(1)NeuAc(3)	N[+3007]	1613.33	3	4837.97	4837.97	0	0.5	521	Specific	227.06	108.14	108.14	5.22	176	>sp|P01266|THYG_HUMAN Thyroglobulin OS=Homo sapiens OX=9606 GN=TG PE=1 SV=5	17152	20210911_zy_tissue_ethcd_2.9808.9808.3	controllerType=0 controllerNumber=1 scan=9808	44.376
06809:3	1	K.PLSVGLDSN[+2935.037]SSTGTPEAAK.K	HexNAc(6)Hex(7)NeuAc(2)	N[+2935]	1589.66	3	4766.97	4765.94	1	4.9	521	Specific	229.05	124.74	124.74	5.12	176	>sp|P01266|THYG_HUMAN Thyroglobulin OS=Homo sapiens OX=9606 GN=TG PE=1 SV=5	17152	20210911_zy_tissue_ethcd_2.7488.7488.3	controllerType=0 controllerNumber=1 scan=7488	33.8861
06519:3	1	K.PLSVGLDSN[+2350.830]SSTGTPEAAK.K	HexNAc(4)Hex(5)Fuc(1)NeuAc(2)	N[+2351]	1394.59	3	4181.74	4181.74	0	1.1	521	Specific	251.31	122.13	122.13	5.15	176	>sp|P01266|THYG_HUMAN Thyroglobulin OS=Homo sapiens OX=9606 GN=TG PE=1 SV=5	17152	20210911_zy_tissue_ethcd_2.7169.7169.3	controllerType=0 controllerNumber=1 scan=7169	32.4406
03715:3	1	K.PLSVGLDSN[+1540.529]SSTGTPEAAK.K	HexNAc(2)Hex(7)	N[+1541]	1124.48	3	3371.44	3371.44	0	-0.1	521	Specific	257.33	224.33	224.33	5.82	176	>sp|P01266|THYG_HUMAN Thyroglobulin OS=Homo sapiens OX=9606 GN=TG PE=1 SV=5	17152	20210911_zy_tissue_ethcd_2.4091.4091.3	controllerType=0 controllerNumber=1 scan=4091	18.7034
03577:3	1	K.PLSVGLDSN[+2498.904]SSTGTPEAAK.K	HexNAc(6)Hex(7)Fuc(1)	N[+2499]	1443.94	3	4329.81	4329.81	0	0	521	Specific	265.02	145.61	145.61	5.73	176	>sp|P01266|THYG_HUMAN Thyroglobulin OS=Homo sapiens OX=9606 GN=TG PE=1 SV=5	17152	20210911_zy_tissue_ethcd_2.3940.3940.3	controllerType=0 controllerNumber=1 scan=3940	18.0164
07432:3	1	K.PLSVGLDSN[+2059.735]SSTGTPEAAK.K	HexNAc(4)Hex(5)Fuc(1)NeuAc(1)	N[+2060]	1297.56	3	3890.65	3890.64	0	2.1	521	Specific	266.28	138.32	138.32	4.91	176	>sp|P01266|THYG_HUMAN Thyroglobulin OS=Homo sapiens OX=9606 GN=TG PE=1 SV=5	17152	20210911_zy_tissue_ethcd_2.8171.8171.3	controllerType=0 controllerNumber=1 scan=8171	36.9743
06851:3	1	K.PLSVGLDSN[+2350.830]SSTGTPEAAK.K	HexNAc(4)Hex(5)Fuc(1)NeuAc(2)	N[+2351]	1394.58	3	4181.73	4181.74	0	-1	521	Specific	268.18	161.05	161.05	5.92	176	>sp|P01266|THYG_HUMAN Thyroglobulin OS=Homo sapiens OX=9606 GN=TG PE=1 SV=5	17152	20210911_zy_tissue_ethcd_2.7534.7534.2	controllerType=0 controllerNumber=1 scan=7534	34.0975
03742:3	1	K.PLSVGLDSN[+1768.640]SSTGTPEAAK.K	HexNAc(4)Hex(5)Fuc(1)	N[+1769]	1200.52	3	3599.54	3599.55	0	-1.3	521	Specific	268.7	175	175	5.92	176	>sp|P01266|THYG_HUMAN Thyroglobulin OS=Homo sapiens OX=9606 GN=TG PE=1 SV=5	17152	20210911_zy_tissue_ethcd_2.4121.4121.3	controllerType=0 controllerNumber=1 scan=4121	18.839
06699:3	1	K.PLSVGLDSN[+2919.042]SSTGTPEAAK.K	HexNAc(6)Hex(6)Fuc(1)NeuAc(2)	N[+2919]	1583.99	3	4749.95	4749.95	0	-0.8	521	Specific	268.85	161.18	161.18	5.92	176	>sp|P01266|THYG_HUMAN Thyroglobulin OS=Homo sapiens OX=9606 GN=TG PE=1 SV=5	17152	20210911_zy_tissue_ethcd_2.7367.7367.3	controllerType=0 controllerNumber=1 scan=7367	33.3363
08739:3	1	K.PLSVGLDSN[+3007.058]SSTGTPEAAK.K	HexNAc(5)Hex(6)Fuc(1)NeuAc(3)	N[+3007]	1613.33	3	4837.96	4837.97	0	-1.1	521	Specific	269.31	155.87	155.87	5.92	176	>sp|P01266|THYG_HUMAN Thyroglobulin OS=Homo sapiens OX=9606 GN=TG PE=1 SV=5	17152	20210911_zy_tissue_ethcd_2.9606.9606.3	controllerType=0 controllerNumber=1 scan=9606	43.4562
06759:3	1	K.PLSVGLDSN[+2715.963]SSTGTPEAAK.K	HexNAc(5)Hex(6)Fuc(1)NeuAc(2)	N[+2716]	1515.96	3	4545.86	4546.87	-1	-1	521	Specific	277.68	171.1	171.1	6.09	176	>sp|P01266|THYG_HUMAN Thyroglobulin OS=Homo sapiens OX=9606 GN=TG PE=1 SV=5	17152	20210911_zy_tissue_ethcd_2.7433.7433.3	controllerType=0 controllerNumber=1 scan=7433	33.6343
04848:3	1	K.PLSVGLDSN[+2204.772]SSTGTPEAAK.K	HexNAc(4)Hex(5)NeuAc(2)	N[+2205]	1346.24	3	4036.69	4035.68	1	2.2	521	Specific	279.25	163.84	163.84	4.99	176	>sp|P01266|THYG_HUMAN Thyroglobulin OS=Homo sapiens OX=9606 GN=TG PE=1 SV=5	17152	20210911_zy_tissue_ethcd_2.5332.5332.3	controllerType=0 controllerNumber=1 scan=5332	24.2698
04852:3	1	K.PLSVGLDSN[+2221.788]SSTGTPEAAK.K	HexNAc(4)Hex(6)Fuc(1)NeuAc(1)	N[+2222]	1351.57	3	4052.69	4052.7	0	-2.3	521	Specific	280.96	150.91	150.91	6.06	176	>sp|P01266|THYG_HUMAN Thyroglobulin OS=Homo sapiens OX=9606 GN=TG PE=1 SV=5	17152	20210911_zy_tissue_ethcd_2.5337.5337.3	controllerType=0 controllerNumber=1 scan=5337	24.29
06985:3	1	K.PLSVGLDSN[+2553.910]SSTGTPEAAK.K	HexNAc(5)Hex(5)Fuc(1)NeuAc(2)	N[+2554]	1461.94	3	4383.81	4384.82	-1	-1.6	521	Specific	295.22	199.23	199.23	6.26	176	>sp|P01266|THYG_HUMAN Thyroglobulin OS=Homo sapiens OX=9606 GN=TG PE=1 SV=5	17152	20210911_zy_tissue_ethcd_2.7681.7681.3	controllerType=0 controllerNumber=1 scan=7681	34.7561
06471:3	1	K.PLSVGLDSN[+2715.963]SSTGTPEAAK.K	HexNAc(5)Hex(6)Fuc(1)NeuAc(2)	N[+2716]	1516.62	3	4547.85	4546.87	1	-4.5	521	Specific	295.25	188.18	188.18	5.61	176	>sp|P01266|THYG_HUMAN Thyroglobulin OS=Homo sapiens OX=9606 GN=TG PE=1 SV=5	17152	20210911_zy_tissue_ethcd_2.7116.7116.3	controllerType=0 controllerNumber=1 scan=7116	32.2033
06781:4	1	K.PLSVGLDSN[+2919.042]SSTGTPEAAK.K	HexNAc(6)Hex(6)Fuc(1)NeuAc(2)	N[+2919]	1187.99	4	4748.94	4749.95	-1	-1.4	521	Specific	305.08	208.01	208.01	6.56	176	>sp|P01266|THYG_HUMAN Thyroglobulin OS=Homo sapiens OX=9606 GN=TG PE=1 SV=5	17152	20210911_zy_tissue_ethcd_2.7457.7457.4	controllerType=0 controllerNumber=1 scan=7457	33.7426
08804:3	1	K.PLSVGLDSN[+3210.137]SSTGTPEAAK.K	HexNAc(6)Hex(6)Fuc(1)NeuAc(3)	N[+3210]	1680.68	3	5040.04	5041.05	-1	-0.5	521	Specific	320.84	212.45	212.45	5.99	176	>sp|P01266|THYG_HUMAN Thyroglobulin OS=Homo sapiens OX=9606 GN=TG PE=1 SV=5	17152	20210911_zy_tissue_ethcd_2.9677.9677.3	controllerType=0 controllerNumber=1 scan=9677	43.7802
07076:3	1	K.PLSVGLDSN[+2553.910]SSTGTPEAAK.K	HexNAc(5)Hex(5)Fuc(1)NeuAc(2)	N[+2554]	1461.94	3	4383.81	4384.82	-1	-1.9	521	Specific	328.75	220.48	220.48	6.31	176	>sp|P01266|THYG_HUMAN Thyroglobulin OS=Homo sapiens OX=9606 GN=TG PE=1 SV=5	17152	20210911_zy_tissue_ethcd_2.7780.7780.3	controllerType=0 controllerNumber=1 scan=7780	35.2011
06577:4	1	K.PLSVGLDSN[+3284.174]SSTGTPEAAK.K	HexNAc(7)Hex(7)Fuc(1)NeuAc(2)	N[+3284]	1279.28	4	5114.08	5115.08	-1	0.2	521	Specific	332.63	233.8	233.8	5.63	176	>sp|P01266|THYG_HUMAN Thyroglobulin OS=Homo sapiens OX=9606 GN=TG PE=1 SV=5	17152	20210911_zy_tissue_ethcd_2.7233.7233.4	controllerType=0 controllerNumber=1 scan=7233	32.7314
04684:3	1	K.PLSVGLDSN[+2424.867]SSTGTPEAAK.K	HexNAc(5)Hex(6)Fuc(1)NeuAc(1)	N[+2425]	1419.27	3	4255.78	4255.78	0	1.3	521	Specific	341.45	182.25	182.25	5.18	176	>sp|P01266|THYG_HUMAN Thyroglobulin OS=Homo sapiens OX=9606 GN=TG PE=1 SV=5	17152	20210911_zy_tissue_ethcd_2.5153.5153.3	controllerType=0 controllerNumber=1 scan=5153	23.471
07037:3	1	K.PLSVGLDSN[+2350.830]SSTGTPEAAK.K	HexNAc(4)Hex(5)Fuc(1)NeuAc(2)	N[+2351]	1394.58	3	4181.73	4181.74	0	-2.2	521	Specific	345.04	215.5	215.5	6.26	176	>sp|P01266|THYG_HUMAN Thyroglobulin OS=Homo sapiens OX=9606 GN=TG PE=1 SV=5	17152	20210911_zy_tissue_ethcd_2.7738.7738.3	controllerType=0 controllerNumber=1 scan=7738	35.0112
04740:3	1	K.PLSVGLDSN[+2569.905]SSTGTPEAAK.K	HexNAc(5)Hex(6)NeuAc(2)	N[+2570]	1467.94	3	4401.81	4400.81	1	-0.2	521	Specific	350.47	244.22	244.22	5.91	176	>sp|P01266|THYG_HUMAN Thyroglobulin OS=Homo sapiens OX=9606 GN=TG PE=1 SV=5	17152	20210911_zy_tissue_ethcd_2.5214.5214.3	controllerType=0 controllerNumber=1 scan=5214	23.7429
07081:3	1	K.PLSVGLDSN[+2350.830]SSTGTPEAAK.K	HexNAc(4)Hex(5)Fuc(1)NeuAc(2)	N[+2351]	1394.58	3	4181.74	4181.74	0	-0.4	521	Specific	351.72	208.21	208.21	5.94	176	>sp|P01266|THYG_HUMAN Thyroglobulin OS=Homo sapiens OX=9606 GN=TG PE=1 SV=5	17152	20210911_zy_tissue_ethcd_2.7786.7786.3	controllerType=0 controllerNumber=1 scan=7786	35.228
03722:3	1	K.PLSVGLDSN[+2133.772]SSTGTPEAAK.K	HexNAc(5)Hex(6)Fuc(1)	N[+2134]	1322.23	3	3964.68	3964.68	0	-0.3	521	Specific	372.49	285.53	285.53	5.87	176	>sp|P01266|THYG_HUMAN Thyroglobulin OS=Homo sapiens OX=9606 GN=TG PE=1 SV=5	17152	20210911_zy_tissue_ethcd_2.4099.4099.3	controllerType=0 controllerNumber=1 scan=4099	18.7393
07127:3	1	K.PLSVGLDSN[+2350.830]SSTGTPEAAK.K	HexNAc(4)Hex(5)Fuc(1)NeuAc(2)	N[+2351]	1394.58	3	4181.74	4181.74	0	-0.4	521	Specific	417.6	291.36	291.36	6.04	176	>sp|P01266|THYG_HUMAN Thyroglobulin OS=Homo sapiens OX=9606 GN=TG PE=1 SV=5	17152	20210911_zy_tissue_ethcd_2.7837.7837.3	controllerType=0 controllerNumber=1 scan=7837	35.4562
08838:4	1	K.PLSVGLDSN[+3210.137]SSTGTPEAAK.K	HexNAc(6)Hex(6)Fuc(1)NeuAc(3)	N[+3210]	1260.77	4	5040.04	5041.05	-1	0	521	Specific	422.53	356.93	356.93	6.76	176	>sp|P01266|THYG_HUMAN Thyroglobulin OS=Homo sapiens OX=9606 GN=TG PE=1 SV=5	17152	20210911_zy_tissue_ethcd_2.9715.9715.4	controllerType=0 controllerNumber=1 scan=9715	43.9516
05433:3	1	K.PLSVGLDSN[+2059.735]SSTGTPEAAK.K	HexNAc(4)Hex(5)Fuc(1)NeuAc(1)	N[+2060]	1297.55	3	3890.64	3890.64	0	-1.1	521	Specific	424.77	290.21	290.21	6.18	176	>sp|P01266|THYG_HUMAN Thyroglobulin OS=Homo sapiens OX=9606 GN=TG PE=1 SV=5	17152	20210911_zy_tissue_ethcd_2.5977.5977.3	controllerType=0 controllerNumber=1 scan=5977	27.0218
06778:3	1	K.PLSVGLDSN[+2919.042]SSTGTPEAAK.K	HexNAc(6)Hex(6)Fuc(1)NeuAc(2)	N[+2919]	1583.99	3	4749.95	4749.95	0	-1	521	Specific	432.2	309.66	309.66	6.18	176	>sp|P01266|THYG_HUMAN Thyroglobulin OS=Homo sapiens OX=9606 GN=TG PE=1 SV=5	17152	20210911_zy_tissue_ethcd_2.7454.7454.3	controllerType=0 controllerNumber=1 scan=7454	33.7283
05308:3	1	K.PLSVGLDSN[+2059.735]SSTGTPEAAK.K	HexNAc(4)Hex(5)Fuc(1)NeuAc(1)	N[+2060]	1297.55	3	3890.64	3890.64	0	-1.9	521	Specific	443.05	282.89	282.89	6.36	176	>sp|P01266|THYG_HUMAN Thyroglobulin OS=Homo sapiens OX=9606 GN=TG PE=1 SV=5	17152	20210911_zy_tissue_ethcd_2.5840.5840.3	controllerType=0 controllerNumber=1 scan=5840	26.4034
03657:3	1	K.PLSVGLDSN[+2133.772]SSTGTPEAAK.K	HexNAc(5)Hex(6)Fuc(1)	N[+2134]	1322.23	3	3964.67	3964.68	0	-1.8	521	Specific	446.28	331.59	331.59	6.54	176	>sp|P01266|THYG_HUMAN Thyroglobulin OS=Homo sapiens OX=9606 GN=TG PE=1 SV=5	17152	20210911_zy_tissue_ethcd_2.4028.4028.3	controllerType=0 controllerNumber=1 scan=4028	18.42
06726:3	1	K.PLSVGLDSN[+2350.830]SSTGTPEAAK.K	HexNAc(4)Hex(5)Fuc(1)NeuAc(2)	N[+2351]	1394.58	3	4181.73	4181.74	0	-1.1	521	Specific	446.28	326.42	326.42	6.28	176	>sp|P01266|THYG_HUMAN Thyroglobulin OS=Homo sapiens OX=9606 GN=TG PE=1 SV=5	17152	20210911_zy_tissue_ethcd_2.7397.7397.2	controllerType=0 controllerNumber=1 scan=7397	33.4701
03827:3	1	K.PLSVGLDSN[+1768.640]SSTGTPEAAK.K	HexNAc(4)Hex(5)Fuc(1)	N[+1769]	1200.52	3	3599.54	3599.55	0	-1.5	521	Specific	464.81	346.5	346.5	6.6	176	>sp|P01266|THYG_HUMAN Thyroglobulin OS=Homo sapiens OX=9606 GN=TG PE=1 SV=5	17152	20210911_zy_tissue_ethcd_2.4214.4214.3	controllerType=0 controllerNumber=1 scan=4214	19.251
06629:3	1	K.PLSVGLDSN[+2350.830]SSTGTPEAAK.K	HexNAc(4)Hex(5)Fuc(1)NeuAc(2)	N[+2351]	1394.58	3	4181.73	4181.74	0	-0.8	521	Specific	473.19	343.71	343.71	6.33	176	>sp|P01266|THYG_HUMAN Thyroglobulin OS=Homo sapiens OX=9606 GN=TG PE=1 SV=5	17152	20210911_zy_tissue_ethcd_2.7290.7290.3	controllerType=0 controllerNumber=1 scan=7290	32.9889
05103:3	1	K.PLSVGLDSN[+2059.735]SSTGTPEAAK.K	HexNAc(4)Hex(5)Fuc(1)NeuAc(1)	N[+2060]	1297.55	3	3890.63	3890.64	0	-2.7	521	Specific	485.81	344.04	344.04	6.54	176	>sp|P01266|THYG_HUMAN Thyroglobulin OS=Homo sapiens OX=9606 GN=TG PE=1 SV=5	17152	20210911_zy_tissue_ethcd_2.5616.5616.3	controllerType=0 controllerNumber=1 scan=5616	25.4545
04776:3	1	K.PLSVGLDSN[+2059.735]SSTGTPEAAK.K	HexNAc(4)Hex(5)Fuc(1)NeuAc(1)	N[+2060]	1297.55	3	3890.64	3890.64	0	-1.6	521	Specific	492.08	349.79	349.79	6.66	176	>sp|P01266|THYG_HUMAN Thyroglobulin OS=Homo sapiens OX=9606 GN=TG PE=1 SV=5	17152	20210911_zy_tissue_ethcd_2.5254.5254.3	controllerType=0 controllerNumber=1 scan=5254	23.9212
04633:3	1	K.PLSVGLDSN[+2789.999]SSTGTPEAAK.K	HexNAc(6)Hex(7)Fuc(1)NeuAc(1)	N[+2790]	1540.97	3	4620.91	4620.91	0	-0.3	521	Specific	492.63	375.04	375.04	6.52	176	>sp|P01266|THYG_HUMAN Thyroglobulin OS=Homo sapiens OX=9606 GN=TG PE=1 SV=5	17152	20210911_zy_tissue_ethcd_2.5097.5097.3	controllerType=0 controllerNumber=1 scan=5097	23.2178
05126:3	1	K.PLSVGLDSN[+2262.814]SSTGTPEAAK.K	HexNAc(5)Hex(5)Fuc(1)NeuAc(1)	N[+2263]	1365.24	3	4093.71	4093.72	0	-3.4	521	Specific	507.24	353.89	353.89	6.27	176	>sp|P01266|THYG_HUMAN Thyroglobulin OS=Homo sapiens OX=9606 GN=TG PE=1 SV=5	17152	20210911_zy_tissue_ethcd_2.5641.5641.3	controllerType=0 controllerNumber=1 scan=5641	25.554
05120:3	1	K.PLSVGLDSN[+2262.814]SSTGTPEAAK.K	HexNAc(5)Hex(5)Fuc(1)NeuAc(1)	N[+2263]	1365.25	3	4093.72	4093.72	0	0.1	521	Specific	515.34	352.95	352.95	5.91	176	>sp|P01266|THYG_HUMAN Thyroglobulin OS=Homo sapiens OX=9606 GN=TG PE=1 SV=5	17152	20210911_zy_tissue_ethcd_2.5634.5634.3	controllerType=0 controllerNumber=1 scan=5634	25.5331
04916:3	1	K.PLSVGLDSN[+2424.867]SSTGTPEAAK.K	HexNAc(5)Hex(6)Fuc(1)NeuAc(1)	N[+2425]	1418.93	3	4254.77	4255.78	-1	-0.6	521	Specific	532.07	384.88	384.88	7.78	176	>sp|P01266|THYG_HUMAN Thyroglobulin OS=Homo sapiens OX=9606 GN=TG PE=1 SV=5	17152	20210911_zy_tissue_ethcd_2.5407.5407.3	controllerType=0 controllerNumber=1 scan=5407	24.5985
06695:3	1	K.PLSVGLDSN[+2715.963]SSTGTPEAAK.K	HexNAc(5)Hex(6)Fuc(1)NeuAc(2)	N[+2716]	1516.29	3	4546.87	4546.87	0	-1.1	521	Specific	573.3	420.94	420.94	7.87	176	>sp|P01266|THYG_HUMAN Thyroglobulin OS=Homo sapiens OX=9606 GN=TG PE=1 SV=5	17152	20210911_zy_tissue_ethcd_2.7363.7363.3	controllerType=0 controllerNumber=1 scan=7363	33.3199
06881:3	1	K.PLSVGLDSN[+2350.830]SSTGTPEAAK.K	HexNAc(4)Hex(5)Fuc(1)NeuAc(2)	N[+2351]	1394.58	3	4181.74	4181.74	0	-0.3	521	Specific	586.45	441.25	441.25	8.76	176	>sp|P01266|THYG_HUMAN Thyroglobulin OS=Homo sapiens OX=9606 GN=TG PE=1 SV=5	17152	20210911_zy_tissue_ethcd_2.7567.7567.3	controllerType=0 controllerNumber=1 scan=7567	34.2438
04755:3	1	K.PLSVGLDSN[+2424.867]SSTGTPEAAK.K	HexNAc(5)Hex(6)Fuc(1)NeuAc(1)	N[+2425]	1419.26	3	4255.77	4255.78	0	-1.5	521	Specific	599.86	427.39	427.39	9.13	176	>sp|P01266|THYG_HUMAN Thyroglobulin OS=Homo sapiens OX=9606 GN=TG PE=1 SV=5	17152	20210911_zy_tissue_ethcd_2.5231.5231.3	controllerType=0 controllerNumber=1 scan=5231	23.8185
06974:3	1	K.PLSVGLDSN[+2350.830]SSTGTPEAAK.K	HexNAc(4)Hex(5)Fuc(1)NeuAc(2)	N[+2351]	1394.58	3	4181.74	4181.74	0	-0.7	521	Specific	610.88	472.4	472.4	9.87	176	>sp|P01266|THYG_HUMAN Thyroglobulin OS=Homo sapiens OX=9606 GN=TG PE=1 SV=5	17152	20210911_zy_tissue_ethcd_2.7669.7669.3	controllerType=0 controllerNumber=1 scan=7669	34.7036
05210:3	1	K.PLSVGLDSN[+2059.735]SSTGTPEAAK.K	HexNAc(4)Hex(5)Fuc(1)NeuAc(1)	N[+2060]	1297.55	3	3890.64	3890.64	0	-1	521	Specific	612.29	458.92	458.92	9.87	176	>sp|P01266|THYG_HUMAN Thyroglobulin OS=Homo sapiens OX=9606 GN=TG PE=1 SV=5	17152	20210911_zy_tissue_ethcd_2.5733.5733.3	controllerType=0 controllerNumber=1 scan=5733	25.9438
07232:3	1	K.PLSVGLDSN[+2059.735]SSTGTPEAAK.K	HexNAc(4)Hex(5)Fuc(1)NeuAc(1)	N[+2060]	1297.55	3	3890.64	3890.64	0	-2	521	Specific	613.15	444.72	444.72	10.08	176	>sp|P01266|THYG_HUMAN Thyroglobulin OS=Homo sapiens OX=9606 GN=TG PE=1 SV=5	17152	20210911_zy_tissue_ethcd_2.7952.7952.3	controllerType=0 controllerNumber=1 scan=7952	35.9854
03667:3	1	K.PLSVGLDSN[+1702.581]SSTGTPEAAK.K	HexNAc(2)Hex(8)	N[+1703]	1178.5	3	3533.49	3533.49	0	-0.7	521	Specific	623.56	496.62	496.62	9.87	176	>sp|P01266|THYG_HUMAN Thyroglobulin OS=Homo sapiens OX=9606 GN=TG PE=1 SV=5	17152	20210911_zy_tissue_ethcd_2.4039.4039.3	controllerType=0 controllerNumber=1 scan=4039	18.4716
05013:3	1	K.PLSVGLDSN[+2059.735]SSTGTPEAAK.K	HexNAc(4)Hex(5)Fuc(1)NeuAc(1)	N[+2060]	1297.55	3	3890.63	3890.64	0	-2.3	521	Specific	635.6	477.01	477.01	10.08	176	>sp|P01266|THYG_HUMAN Thyroglobulin OS=Homo sapiens OX=9606 GN=TG PE=1 SV=5	17152	20210911_zy_tissue_ethcd_2.5516.5516.3	controllerType=0 controllerNumber=1 scan=5516	25.0468
03412:3	1	K.PLSVGLDSN[+2059.735]SSTGTPEAAKK.D	HexNAc(4)Hex(5)Fuc(1)NeuAc(1)	N[+2060]	1340.25	3	4018.73	4018.74	0	-1.5	521	Specific	221.59	71.15	71.15	4.2	176	>sp|P01266|THYG_HUMAN Thyroglobulin OS=Homo sapiens OX=9606 GN=TG PE=1 SV=5	17152	20210911_zy_tissue_ethcd_2.3759.3759.3	controllerType=0 controllerNumber=1 scan=3759	17.1954
03546:3	1	K.PLSVGLDSN[+2059.735]SSTGTPEAAKK.D	HexNAc(4)Hex(5)Fuc(1)NeuAc(1)	N[+2060]	1340.25	3	4018.72	4018.74	0	-3.6	521	Specific	230.95	77.04	77.04	5.24	176	>sp|P01266|THYG_HUMAN Thyroglobulin OS=Homo sapiens OX=9606 GN=TG PE=1 SV=5	17152	20210911_zy_tissue_ethcd_2.3906.3906.3	controllerType=0 controllerNumber=1 scan=3906	17.8578
02661:3	1	K.PLSVGLDSN[+1702.581]SSTGTPEAAKK.D	HexNAc(2)Hex(8)	N[+1703]	1221.2	3	3661.58	3661.58	0	-1.2	521	Specific	292.68	195.63	195.63	5.47	176	>sp|P01266|THYG_HUMAN Thyroglobulin OS=Homo sapiens OX=9606 GN=TG PE=1 SV=5	17152	20210911_zy_tissue_ethcd_2.2935.2935.3	controllerType=0 controllerNumber=1 scan=2935	13.4751
03287:3	1	K.PLSVGLDSN[+2424.867]SSTGTPEAAKK.D	HexNAc(5)Hex(6)Fuc(1)NeuAc(1)	N[+2425]	1461.63	3	4382.86	4383.87	-1	-1.1	521	Specific	416.86	277.75	277.75	5.88	176	>sp|P01266|THYG_HUMAN Thyroglobulin OS=Homo sapiens OX=9606 GN=TG PE=1 SV=5	17152	20210911_zy_tissue_ethcd_2.3622.3622.3	controllerType=0 controllerNumber=1 scan=3622	16.5769
04397:3	1	K.PLSVGLDSN[+2350.830]SSTGTPEAAKK.D	HexNAc(4)Hex(5)Fuc(1)NeuAc(2)	N[+2351]	1437.28	3	4309.83	4309.83	0	-1.1	521	Specific	480.76	330.82	330.82	5.91	176	>sp|P01266|THYG_HUMAN Thyroglobulin OS=Homo sapiens OX=9606 GN=TG PE=1 SV=5	17152	20210911_zy_tissue_ethcd_2.4839.4839.3	controllerType=0 controllerNumber=1 scan=4839	22.0722
03327:3	1	K.PLSVGLDSN[+2059.735]SSTGTPEAAKK.D	HexNAc(4)Hex(5)Fuc(1)NeuAc(1)	N[+2060]	1340.25	3	4018.73	4018.74	0	-0.9	521	Specific	507.2	308.99	308.99	5.94	176	>sp|P01266|THYG_HUMAN Thyroglobulin OS=Homo sapiens OX=9606 GN=TG PE=1 SV=5	17152	20210911_zy_tissue_ethcd_2.3666.3666.3	controllerType=0 controllerNumber=1 scan=3666	16.7762
02160:3	1	R.ETEEIVSASN[+2424.867]SSR.F	HexNAc(5)Hex(6)Fuc(1)NeuAc(1)	N[+2425]	1278.51	3	3833.52	3833.52	0	-1.1	938	Specific	203.13	46.84	46.84	3.32	176	>sp|P01266|THYG_HUMAN Thyroglobulin OS=Homo sapiens OX=9606 GN=TG PE=1 SV=5	17152	20210911_zy_tissue_ethcd_2.2385.2385.3	controllerType=0 controllerNumber=1 scan=2385	11.0038
03039:3	1	R.ETEEIVSASN[+2553.910]SSR.F	HexNAc(5)Hex(5)Fuc(1)NeuAc(2)	N[+2554]	1321.53	3	3962.56	3962.56	0	-0.5	938	Specific	206.24	91.53	91.53	3.97	176	>sp|P01266|THYG_HUMAN Thyroglobulin OS=Homo sapiens OX=9606 GN=TG PE=1 SV=5	17152	20210911_zy_tissue_ethcd_2.3350.3350.3	controllerType=0 controllerNumber=1 scan=3350	15.3459
03122:3	1	R.ETEEIVSASN[+2553.910]SSR.F	HexNAc(5)Hex(5)Fuc(1)NeuAc(2)	N[+2554]	1321.53	3	3962.56	3962.56	0	-0.6	938	Specific	209.65	59.07	59.07	3.11	176	>sp|P01266|THYG_HUMAN Thyroglobulin OS=Homo sapiens OX=9606 GN=TG PE=1 SV=5	17152	20210911_zy_tissue_ethcd_2.3441.3441.3	controllerType=0 controllerNumber=1 scan=3441	15.7609
02311:3	1	R.ETEEIVSASN[+2262.814]SSR.F	HexNAc(5)Hex(5)Fuc(1)NeuAc(1)	N[+2263]	1224.49	3	3671.47	3671.47	0	-0.9	938	Specific	215.69	92.93	92.93	4.02	176	>sp|P01266|THYG_HUMAN Thyroglobulin OS=Homo sapiens OX=9606 GN=TG PE=1 SV=5	17152	20210911_zy_tissue_ethcd_2.2551.2551.3	controllerType=0 controllerNumber=1 scan=2551	11.7408
02409:3	1	R.ETEEIVSASN[+2059.735]SSR.F	HexNAc(4)Hex(5)Fuc(1)NeuAc(1)	N[+2060]	1156.8	3	3468.39	3468.39	0	-0.5	938	Specific	225.06	86.06	86.06	5.06	176	>sp|P01266|THYG_HUMAN Thyroglobulin OS=Homo sapiens OX=9606 GN=TG PE=1 SV=5	17152	20210911_zy_tissue_ethcd_2.2659.2659.3	controllerType=0 controllerNumber=1 scan=2659	12.227
02396:3	1	R.ETEEIVSASN[+1622.582]SSR.F	HexNAc(4)Hex(5)	N[+1623]	1011.08	3	3031.24	3031.24	0	0	938	Specific	233.35	131.82	131.82	4.82	176	>sp|P01266|THYG_HUMAN Thyroglobulin OS=Homo sapiens OX=9606 GN=TG PE=1 SV=5	17152	20210911_zy_tissue_ethcd_2.2644.2644.3	controllerType=0 controllerNumber=1 scan=2644	12.161
02365:2	1	R.ETEEIVSASN[+1403.507]SSR.F	HexNAc(3)Hex(4)Fuc(1)	N[+1404]	1406.58	2	2812.16	2812.16	0	-0.1	938	Specific	246.41	162.6	162.6	5.05	176	>sp|P01266|THYG_HUMAN Thyroglobulin OS=Homo sapiens OX=9606 GN=TG PE=1 SV=5	17152	20210911_zy_tissue_ethcd_2.2610.2610.2	controllerType=0 controllerNumber=1 scan=2610	12.0101
02210:2	1	R.ETEEIVSASN[+1241.454]SSR.F	HexNAc(3)Hex(3)Fuc(1)	N[+1241]	1325.56	2	2650.12	2650.11	0	2.9	938	Specific	248.54	133.2	133.2	4.28	176	>sp|P01266|THYG_HUMAN Thyroglobulin OS=Homo sapiens OX=9606 GN=TG PE=1 SV=5	17152	20210911_zy_tissue_ethcd_2.2439.2439.2	controllerType=0 controllerNumber=1 scan=2439	11.2428
01839:3	1	R.ETEEIVSASN[+1987.714]SSR.F	HexNAc(5)Hex(6)	N[+1988]	1132.8	3	3396.38	3396.37	0	2.8	938	Specific	255.97	172.56	172.56	4.39	176	>sp|P01266|THYG_HUMAN Thyroglobulin OS=Homo sapiens OX=9606 GN=TG PE=1 SV=5	17152	20210911_zy_tissue_ethcd_2.2033.2033.3	controllerType=0 controllerNumber=1 scan=2033	9.4453
02245:3	1	R.ETEEIVSASN[+1548.545]SSR.F	HexNAc(3)Hex(4)NeuAc(1)	N[+1549]	986.402	3	2957.19	2957.2	0	-2.5	938	Specific	268.93	131.98	131.98	5.65	176	>sp|P01266|THYG_HUMAN Thyroglobulin OS=Homo sapiens OX=9606 GN=TG PE=1 SV=5	17152	20210911_zy_tissue_ethcd_2.2479.2479.3	controllerType=0 controllerNumber=1 scan=2479	11.4122
02149:3	1	R.ETEEIVSASN[+2789.999]SSR.F	HexNAc(6)Hex(7)Fuc(1)NeuAc(1)	N[+2790]	1400.22	3	4198.65	4198.65	0	-0.8	938	Specific	305.73	151.38	151.38	5.26	176	>sp|P01266|THYG_HUMAN Thyroglobulin OS=Homo sapiens OX=9606 GN=TG PE=1 SV=5	17152	20210911_zy_tissue_ethcd_2.2373.2373.3	controllerType=0 controllerNumber=1 scan=2373	10.9497
01808:3	1	R.ETEEIVSASN[+2133.772]SSR.F	HexNAc(5)Hex(6)Fuc(1)	N[+2134]	1181.48	3	3542.42	3542.43	0	-1.4	938	Specific	314.15	236.84	236.84	5.61	176	>sp|P01266|THYG_HUMAN Thyroglobulin OS=Homo sapiens OX=9606 GN=TG PE=1 SV=5	17152	20210911_zy_tissue_ethcd_2.2000.2000.3	controllerType=0 controllerNumber=1 scan=2000	9.3037
02189:3	1	R.ETEEIVSASN[+2424.867]SSR.F	HexNAc(5)Hex(6)Fuc(1)NeuAc(1)	N[+2425]	1278.51	3	3833.52	3833.52	0	-0.9	938	Specific	315.64	144.81	144.81	5.26	176	>sp|P01266|THYG_HUMAN Thyroglobulin OS=Homo sapiens OX=9606 GN=TG PE=1 SV=5	17152	20210911_zy_tissue_ethcd_2.2416.2416.2	controllerType=0 controllerNumber=1 scan=2416	11.1373
01866:3	1	R.ETEEIVSASN[+1606.587]SSR.F	HexNAc(4)Hex(4)Fuc(1)	N[+1607]	1005.75	3	3015.23	3015.24	0	-3	938	Specific	332.4	228.28	228.28	5.3	176	>sp|P01266|THYG_HUMAN Thyroglobulin OS=Homo sapiens OX=9606 GN=TG PE=1 SV=5	17152	20210911_zy_tissue_ethcd_2.2063.2063.3	controllerType=0 controllerNumber=1 scan=2063	9.5748
02379:2	1	R.ETEEIVSASN[+1241.454]SSR.F	HexNAc(3)Hex(3)Fuc(1)	N[+1241]	1325.56	2	2650.11	2650.11	0	-0.9	938	Specific	339.23	232.39	232.39	5.65	176	>sp|P01266|THYG_HUMAN Thyroglobulin OS=Homo sapiens OX=9606 GN=TG PE=1 SV=5	17152	20210911_zy_tissue_ethcd_2.2626.2626.2	controllerType=0 controllerNumber=1 scan=2626	12.0802
02194:3	1	R.ETEEIVSASN[+2221.788]SSR.F	HexNAc(4)Hex(6)Fuc(1)NeuAc(1)	N[+2222]	1210.82	3	3630.43	3630.44	0	-2.4	938	Specific	342.18	174.44	174.44	5.65	176	>sp|P01266|THYG_HUMAN Thyroglobulin OS=Homo sapiens OX=9606 GN=TG PE=1 SV=5	17152	20210911_zy_tissue_ethcd_2.2422.2422.3	controllerType=0 controllerNumber=1 scan=2422	11.1608
01887:3	1	R.ETEEIVSASN[+1768.640]SSR.F	HexNAc(4)Hex(5)Fuc(1)	N[+1769]	1059.77	3	3177.29	3177.29	0	-2	938	Specific	343.86	182.1	182.1	5.59	176	>sp|P01266|THYG_HUMAN Thyroglobulin OS=Homo sapiens OX=9606 GN=TG PE=1 SV=5	17152	20210911_zy_tissue_ethcd_2.2086.2086.3	controllerType=0 controllerNumber=1 scan=2086	9.6761
02172:3	1	R.ETEEIVSASN[+2075.730]SSR.F	HexNAc(4)Hex(6)NeuAc(1)	N[+2076]	1162.13	3	3484.39	3484.38	0	0.5	938	Specific	348.86	186.27	186.27	4.78	176	>sp|P01266|THYG_HUMAN Thyroglobulin OS=Homo sapiens OX=9606 GN=TG PE=1 SV=5	17152	20210911_zy_tissue_ethcd_2.2398.2398.3	controllerType=0 controllerNumber=1 scan=2398	11.0546
02302:3	1	R.ETEEIVSASN[+2059.735]SSR.F	HexNAc(4)Hex(5)Fuc(1)NeuAc(1)	N[+2060]	1156.8	3	3468.38	3468.39	0	-1.6	938	Specific	352.2	215.04	215.04	5.75	176	>sp|P01266|THYG_HUMAN Thyroglobulin OS=Homo sapiens OX=9606 GN=TG PE=1 SV=5	17152	20210911_zy_tissue_ethcd_2.2541.2541.3	controllerType=0 controllerNumber=1 scan=2541	11.6971
02203:2	1	R.ETEEIVSASN[+1403.507]SSR.F	HexNAc(3)Hex(4)Fuc(1)	N[+1404]	1406.59	2	2812.16	2812.16	0	0.4	938	Specific	352.83	260.41	260.41	5.1	176	>sp|P01266|THYG_HUMAN Thyroglobulin OS=Homo sapiens OX=9606 GN=TG PE=1 SV=5	17152	20210911_zy_tissue_ethcd_2.2432.2432.2	controllerType=0 controllerNumber=1 scan=2432	11.2069
02290:3	1	R.ETEEIVSASN[+2262.814]SSR.F	HexNAc(5)Hex(5)Fuc(1)NeuAc(1)	N[+2263]	1224.49	3	3671.47	3671.47	0	-0.7	938	Specific	361.09	212.16	212.16	5.28	176	>sp|P01266|THYG_HUMAN Thyroglobulin OS=Homo sapiens OX=9606 GN=TG PE=1 SV=5	17152	20210911_zy_tissue_ethcd_2.2528.2528.3	controllerType=0 controllerNumber=1 scan=2528	11.6338
02127:3	1	R.ETEEIVSASN[+2059.735]SSR.F	HexNAc(4)Hex(5)Fuc(1)NeuAc(1)	N[+2060]	1156.8	3	3468.38	3468.39	0	-2.4	938	Specific	371.97	193.03	193.03	5.49	176	>sp|P01266|THYG_HUMAN Thyroglobulin OS=Homo sapiens OX=9606 GN=TG PE=1 SV=5	17152	20210911_zy_tissue_ethcd_2.2349.2349.3	controllerType=0 controllerNumber=1 scan=2349	10.8442
02298:3	1	R.ETEEIVSASN[+2133.772]SSR.F	HexNAc(5)Hex(6)Fuc(1)	N[+2134]	1181.48	3	3542.42	3542.43	0	-0.9	938	Specific	377.75	252.2	252.2	5.44	176	>sp|P01266|THYG_HUMAN Thyroglobulin OS=Homo sapiens OX=9606 GN=TG PE=1 SV=5	17152	20210911_zy_tissue_ethcd_2.2537.2537.3	controllerType=0 controllerNumber=1 scan=2537	11.6779
03030:3	1	R.ETEEIVSASN[+2350.830]SSR.F	HexNAc(4)Hex(5)Fuc(1)NeuAc(2)	N[+2351]	1253.83	3	3759.48	3759.49	0	-1.5	938	Specific	379.65	216.1	216.1	5.74	176	>sp|P01266|THYG_HUMAN Thyroglobulin OS=Homo sapiens OX=9606 GN=TG PE=1 SV=5	17152	20210911_zy_tissue_ethcd_2.3340.3340.3	controllerType=0 controllerNumber=1 scan=3340	15.3022
02946:3	1	R.ETEEIVSASN[+2715.963]SSR.F	HexNAc(5)Hex(6)Fuc(1)NeuAc(2)	N[+2716]	1375.54	3	4124.61	4124.62	0	-0.7	938	Specific	391.86	232.71	232.71	5.46	176	>sp|P01266|THYG_HUMAN Thyroglobulin OS=Homo sapiens OX=9606 GN=TG PE=1 SV=5	17152	20210911_zy_tissue_ethcd_2.3247.3247.3	controllerType=0 controllerNumber=1 scan=3247	14.879
02857:3	1	R.ETEEIVSASN[+2715.963]SSR.F	HexNAc(5)Hex(6)Fuc(1)NeuAc(2)	N[+2716]	1375.54	3	4124.61	4124.62	0	-0.7	938	Specific	413.32	217.81	217.81	5.47	176	>sp|P01266|THYG_HUMAN Thyroglobulin OS=Homo sapiens OX=9606 GN=TG PE=1 SV=5	17152	20210911_zy_tissue_ethcd_2.3150.3150.3	controllerType=0 controllerNumber=1 scan=3150	14.4394
02877:3	1	R.ETEEIVSASN[+2715.963]SSR.F	HexNAc(5)Hex(6)Fuc(1)NeuAc(2)	N[+2716]	1375.54	3	4124.62	4124.62	0	0.4	938	Specific	437.7	251.91	251.91	4.93	176	>sp|P01266|THYG_HUMAN Thyroglobulin OS=Homo sapiens OX=9606 GN=TG PE=1 SV=5	17152	20210911_zy_tissue_ethcd_2.3172.3172.3	controllerType=0 controllerNumber=1 scan=3172	14.5378
01695:3	1	R.ETEEIVSASN[+2059.735]SSR.F	HexNAc(4)Hex(5)Fuc(1)NeuAc(1)	N[+2060]	1156.8	3	3468.39	3468.39	0	-0.8	938	Specific	447.22	247.89	247.89	5.61	176	>sp|P01266|THYG_HUMAN Thyroglobulin OS=Homo sapiens OX=9606 GN=TG PE=1 SV=5	17152	20210911_zy_tissue_ethcd_2.1876.1876.3	controllerType=0 controllerNumber=1 scan=1876	8.7497
01852:2	1	R.ETEEIVSASN[+1403.507]SSR.F	HexNAc(3)Hex(4)Fuc(1)	N[+1404]	1406.58	2	2812.16	2812.16	0	-1.2	938	Specific	451.43	308.49	308.49	5.87	176	>sp|P01266|THYG_HUMAN Thyroglobulin OS=Homo sapiens OX=9606 GN=TG PE=1 SV=5	17152	20210911_zy_tissue_ethcd_2.2048.2048.2	controllerType=0 controllerNumber=1 scan=2048	9.508
02326:3	1	R.ETEEIVSASN[+2059.735]SSR.F	HexNAc(4)Hex(5)Fuc(1)NeuAc(1)	N[+2060]	1156.8	3	3468.38	3468.39	0	-1.6	938	Specific	462.83	293.1	293.1	5.94	176	>sp|P01266|THYG_HUMAN Thyroglobulin OS=Homo sapiens OX=9606 GN=TG PE=1 SV=5	17152	20210911_zy_tissue_ethcd_2.2568.2568.3	controllerType=0 controllerNumber=1 scan=2568	11.8163
02273:3	1	R.ETEEIVSASN[+2627.947]SSR.F	HexNAc(6)Hex(6)Fuc(1)NeuAc(1)	N[+2628]	1346.2	3	4036.59	4036.6	0	-2.7	938	Specific	476.17	242.19	242.19	5.47	176	>sp|P01266|THYG_HUMAN Thyroglobulin OS=Homo sapiens OX=9606 GN=TG PE=1 SV=5	17152	20210911_zy_tissue_ethcd_2.2509.2509.3	controllerType=0 controllerNumber=1 scan=2509	11.5485
02254:3	1	R.ETEEIVSASN[+1897.682]SSR.F	HexNAc(4)Hex(4)Fuc(1)NeuAc(1)	N[+1898]	1102.78	3	3306.33	3306.34	0	-1.5	938	Specific	487.19	297.48	297.48	5.93	176	>sp|P01266|THYG_HUMAN Thyroglobulin OS=Homo sapiens OX=9606 GN=TG PE=1 SV=5	17152	20210911_zy_tissue_ethcd_2.2489.2489.3	controllerType=0 controllerNumber=1 scan=2489	11.4573
01797:3	1	R.ETEEIVSASN[+2498.904]SSR.F	HexNAc(6)Hex(7)Fuc(1)	N[+2499]	1303.19	3	3907.56	3907.56	0	-0.8	938	Specific	508.84	343.2	343.2	5.84	176	>sp|P01266|THYG_HUMAN Thyroglobulin OS=Homo sapiens OX=9606 GN=TG PE=1 SV=5	17152	20210911_zy_tissue_ethcd_2.1988.1988.3	controllerType=0 controllerNumber=1 scan=1988	9.2513
02233:3	1	R.ETEEIVSASN[+2424.867]SSR.F	HexNAc(5)Hex(6)Fuc(1)NeuAc(1)	N[+2425]	1278.51	3	3833.52	3833.52	0	-0.6	938	Specific	517.43	277.13	277.13	5.7	176	>sp|P01266|THYG_HUMAN Thyroglobulin OS=Homo sapiens OX=9606 GN=TG PE=1 SV=5	17152	20210911_zy_tissue_ethcd_2.2466.2466.3	controllerType=0 controllerNumber=1 scan=2466	11.3533
02928:3	1	R.ETEEIVSASN[+2204.772]SSR.F	HexNAc(4)Hex(5)NeuAc(2)	N[+2205]	1205.14	3	3613.42	3613.43	0	-3	938	Specific	528.05	337.81	337.81	5.94	176	>sp|P01266|THYG_HUMAN Thyroglobulin OS=Homo sapiens OX=9606 GN=TG PE=1 SV=5	17152	20210911_zy_tissue_ethcd_2.3228.3228.3	controllerType=0 controllerNumber=1 scan=3228	14.7892
03142:3	1	R.ETEEIVSASN[+2059.735]SSR.F	HexNAc(4)Hex(5)Fuc(1)NeuAc(1)	N[+2060]	1156.8	3	3468.38	3468.39	0	-1.7	938	Specific	541.24	363.27	363.27	6.44	176	>sp|P01266|THYG_HUMAN Thyroglobulin OS=Homo sapiens OX=9606 GN=TG PE=1 SV=5	17152	20210911_zy_tissue_ethcd_2.3463.3463.3	controllerType=0 controllerNumber=1 scan=3463	15.8595
01843:3	1	R.ETEEIVSASN[+1622.582]SSR.F	HexNAc(4)Hex(5)	N[+1623]	1011.08	3	3031.24	3031.24	0	-0.5	938	Specific	548.24	379.13	379.13	7	176	>sp|P01266|THYG_HUMAN Thyroglobulin OS=Homo sapiens OX=9606 GN=TG PE=1 SV=5	17152	20210911_zy_tissue_ethcd_2.2038.2038.3	controllerType=0 controllerNumber=1 scan=2038	9.4643
03134:3	1	R.ETEEIVSASN[+2059.735]SSR.F	HexNAc(4)Hex(5)Fuc(1)NeuAc(1)	N[+2060]	1156.8	3	3468.38	3468.39	0	-3	938	Specific	567.19	377.41	377.41	6.31	176	>sp|P01266|THYG_HUMAN Thyroglobulin OS=Homo sapiens OX=9606 GN=TG PE=1 SV=5	17152	20210911_zy_tissue_ethcd_2.3454.3454.3	controllerType=0 controllerNumber=1 scan=3454	15.8203
02264:3	1	R.ETEEIVSASN[+2059.735]SSR.F	HexNAc(4)Hex(5)Fuc(1)NeuAc(1)	N[+2060]	1156.8	3	3468.38	3468.39	0	-1.5	938	Specific	573.59	372.2	372.2	6.63	176	>sp|P01266|THYG_HUMAN Thyroglobulin OS=Homo sapiens OX=9606 GN=TG PE=1 SV=5	17152	20210911_zy_tissue_ethcd_2.2500.2500.3	controllerType=0 controllerNumber=1 scan=2500	11.5071
02226:3	1	R.ETEEIVSASN[+2424.867]SSR.F	HexNAc(5)Hex(6)Fuc(1)NeuAc(1)	N[+2425]	1278.51	3	3833.52	3833.52	0	-0.5	938	Specific	581.45	327.63	327.63	6.97	176	>sp|P01266|THYG_HUMAN Thyroglobulin OS=Homo sapiens OX=9606 GN=TG PE=1 SV=5	17152	20210911_zy_tissue_ethcd_2.2458.2458.3	controllerType=0 controllerNumber=1 scan=2458	11.3188
02193:3	1	R.ETEEIVSASN[+1913.677]SSR.F	HexNAc(4)Hex(5)NeuAc(1)	N[+1914]	1108.11	3	3322.33	3322.33	0	-1.9	938	Specific	588.49	403.33	403.33	8.57	176	>sp|P01266|THYG_HUMAN Thyroglobulin OS=Homo sapiens OX=9606 GN=TG PE=1 SV=5	17152	20210911_zy_tissue_ethcd_2.2421.2421.3	controllerType=0 controllerNumber=1 scan=2421	11.1558
02249:3	1	R.ETEEIVSASN[+2059.735]SSR.F	HexNAc(4)Hex(5)Fuc(1)NeuAc(1)	N[+2060]	1156.8	3	3468.38	3468.39	0	-1.6	938	Specific	592.64	403.38	403.38	8.57	176	>sp|P01266|THYG_HUMAN Thyroglobulin OS=Homo sapiens OX=9606 GN=TG PE=1 SV=5	17152	20210911_zy_tissue_ethcd_2.2483.2483.3	controllerType=0 controllerNumber=1 scan=2483	11.4314
01793:3	1	R.ETEEIVSASN[+2133.772]SSR.F	HexNAc(5)Hex(6)Fuc(1)	N[+2134]	1181.48	3	3542.42	3542.43	0	-2.6	938	Specific	597.54	389.35	389.35	8.52	176	>sp|P01266|THYG_HUMAN Thyroglobulin OS=Homo sapiens OX=9606 GN=TG PE=1 SV=5	17152	20210911_zy_tissue_ethcd_2.1983.1983.3	controllerType=0 controllerNumber=1 scan=1983	9.2322
02380:3	1	R.ETEEIVSASN[+1768.640]SSR.F	HexNAc(4)Hex(5)Fuc(1)	N[+1769]	1059.77	3	3177.29	3177.29	0	-2.8	938	Specific	613.1	404.77	404.77	9.25	176	>sp|P01266|THYG_HUMAN Thyroglobulin OS=Homo sapiens OX=9606 GN=TG PE=1 SV=5	17152	20210911_zy_tissue_ethcd_2.2627.2627.3	controllerType=0 controllerNumber=1 scan=2627	12.0857
02197:2	1	R.ETEEIVSASN[+2059.735]SSR.F	HexNAc(4)Hex(5)Fuc(1)NeuAc(1)	N[+2060]	1734.7	2	3468.39	3468.39	0	-0.2	938	Specific	640.82	429.75	429.75	9.38	176	>sp|P01266|THYG_HUMAN Thyroglobulin OS=Homo sapiens OX=9606 GN=TG PE=1 SV=5	17152	20210911_zy_tissue_ethcd_2.2425.2425.2	controllerType=0 controllerNumber=1 scan=2425	11.1744
13407:3	1	R.ETEEIVSASN[+2059.735]SSRFPLGESFLVAK.G	HexNAc(4)Hex(5)Fuc(1)NeuAc(1)	N[+2060]	1552.68	3	4656.03	4657.04	-1	-1.6	938	Specific	264.32	137.35	137.35	5.82	176	>sp|P01266|THYG_HUMAN Thyroglobulin OS=Homo sapiens OX=9606 GN=TG PE=1 SV=5	17152	20210911_zy_tissue_ethcd_2.14728.14728.3	controllerType=0 controllerNumber=1 scan=14728	66.5108
13449:3	1	R.ETEEIVSASN[+2059.735]SSRFPLGESFLVAK.G	HexNAc(4)Hex(5)Fuc(1)NeuAc(1)	N[+2060]	1553.01	3	4657.02	4657.04	0	-4.2	938	Specific	271.2	138.75	138.75	5.19	176	>sp|P01266|THYG_HUMAN Thyroglobulin OS=Homo sapiens OX=9606 GN=TG PE=1 SV=5	17152	20210911_zy_tissue_ethcd_2.14774.14774.3	controllerType=0 controllerNumber=1 scan=14774	66.7148
13468:3	1	R.ETEEIVSASN[+2059.735]SSRFPLGESFLVAK.G	HexNAc(4)Hex(5)Fuc(1)NeuAc(1)	N[+2060]	1552.68	3	4656.04	4657.04	-1	-0.5	938	Specific	434.17	298.05	298.05	5.79	176	>sp|P01266|THYG_HUMAN Thyroglobulin OS=Homo sapiens OX=9606 GN=TG PE=1 SV=5	17152	20210911_zy_tissue_ethcd_2.14795.14795.3	controllerType=0 controllerNumber=1 scan=14795	66.8074
13878:5	1	K.TFGTLVSIPVC[+57.021]N[+2407.852]NSSVQVGC[+57.021]LTRERLGVN[+2432.884]VTWK.S	HexNAc(5)Hex(5)NeuAc(2),HexNAc(6)Hex(3)Fuc(1)NeuAc(2)	C[+57]*2, N[+2408][+2433]	1707.14	5	8531.66	8532.64	-1	3.3	1337	Specific	254.61	195.39	2.62	2.24	176	>sp|P01266|THYG_HUMAN Thyroglobulin OS=Homo sapiens OX=9606 GN=TG PE=1 SV=5	17152	20210911_zy_tissue_ethcd_2.15243.15243.5	controllerType=0 controllerNumber=1 scan=15243	68.7851
04885:3	1	R.ERLGVN[+1913.677]VTWK.S	HexNAc(4)Hex(5)NeuAc(1)	N[+1914]	1039.12	3	3115.34	3115.35	0	-0.3	1360	Specific	206.34	86.49	86.49	2.32	176	>sp|P01266|THYG_HUMAN Thyroglobulin OS=Homo sapiens OX=9606 GN=TG PE=1 SV=5	17152	20210911_zy_tissue_ethcd_2.5373.5373.3	controllerType=0 controllerNumber=1 scan=5373	24.4462
04883:3	1	R.ERLGVN[+2116.756]VTWK.S	HexNAc(5)Hex(5)NeuAc(1)	N[+2117]	1106.81	3	3318.42	3318.43	0	-1.5	1360	Specific	225.25	62.97	62.97	4.06	176	>sp|P01266|THYG_HUMAN Thyroglobulin OS=Homo sapiens OX=9606 GN=TG PE=1 SV=5	17152	20210911_zy_tissue_ethcd_2.5370.5370.3	controllerType=0 controllerNumber=1 scan=5370	24.4352
03639:3	1	R.ERLGVN[+1216.423]VTWK.S	HexNAc(2)Hex(5)	N[+1216]	806.701	3	2418.09	2418.09	0	-1.5	1360	Specific	225.55	131.84	131.84	4.45	176	>sp|P01266|THYG_HUMAN Thyroglobulin OS=Homo sapiens OX=9606 GN=TG PE=1 SV=5	17152	20210911_zy_tissue_ethcd_2.4008.4008.3	controllerType=0 controllerNumber=1 scan=4008	18.3311
03586:3	1	R.ERLGVN[+1784.634]VTWK.S	HexNAc(4)Hex(6)	N[+1785]	996.104	3	2986.3	2986.3	0	-2	1360	Specific	252.88	134.84	134.84	4.37	176	>sp|P01266|THYG_HUMAN Thyroglobulin OS=Homo sapiens OX=9606 GN=TG PE=1 SV=5	17152	20210911_zy_tissue_ethcd_2.3950.3950.3	controllerType=0 controllerNumber=1 scan=3950	18.0621
07015:3	1	R.ERLGVN[+2204.772]VTWK.S	HexNAc(4)Hex(5)NeuAc(2)	N[+2205]	1136.15	3	3406.43	3406.44	0	-2.5	1360	Specific	255.93	102.76	102.76	4.29	176	>sp|P01266|THYG_HUMAN Thyroglobulin OS=Homo sapiens OX=9606 GN=TG PE=1 SV=5	17152	20210911_zy_tissue_ethcd_2.7714.7714.3	controllerType=0 controllerNumber=1 scan=7714	34.9037
04882:3	1	R.ERLGVN[+2237.783]VTWK.S	HexNAc(4)Hex(7)NeuAc(1)	N[+2238]	1147.15	3	3439.44	3439.45	0	-2.9	1360	Specific	267.28	80.64	80.64	4.35	176	>sp|P01266|THYG_HUMAN Thyroglobulin OS=Homo sapiens OX=9606 GN=TG PE=1 SV=5	17152	20210911_zy_tissue_ethcd_2.5369.5369.3	controllerType=0 controllerNumber=1 scan=5369	24.4306
04928:3	1	R.ERLGVN[+1913.677]VTWK.S	HexNAc(4)Hex(5)NeuAc(1)	N[+1914]	1039.12	3	3115.34	3115.35	0	-2.6	1360	Specific	278.82	133.68	133.68	4.65	176	>sp|P01266|THYG_HUMAN Thyroglobulin OS=Homo sapiens OX=9606 GN=TG PE=1 SV=5	17152	20210911_zy_tissue_ethcd_2.5420.5420.3	controllerType=0 controllerNumber=1 scan=5420	24.6557
03576:3	1	R.ERLGVN[+1581.555]VTWK.S	HexNAc(3)Hex(6)	N[+1582]	928.411	3	2783.22	2783.22	0	-1.8	1360	Specific	279.34	130.82	130.82	4.45	176	>sp|P01266|THYG_HUMAN Thyroglobulin OS=Homo sapiens OX=9606 GN=TG PE=1 SV=5	17152	20210911_zy_tissue_ethcd_2.3939.3939.3	controllerType=0 controllerNumber=1 scan=3939	18.0115
04902:3	1	R.ERLGVN[+1872.651]VTWK.S	HexNAc(3)Hex(6)NeuAc(1)	N[+1873]	1025.44	3	3074.31	3074.32	0	-2.1	1360	Specific	300.95	153.48	153.48	4.31	176	>sp|P01266|THYG_HUMAN Thyroglobulin OS=Homo sapiens OX=9606 GN=TG PE=1 SV=5	17152	20210911_zy_tissue_ethcd_2.5391.5391.3	controllerType=0 controllerNumber=1 scan=5391	24.528
04897:3	1	R.ERLGVN[+2237.783]VTWK.S	HexNAc(4)Hex(7)NeuAc(1)	N[+2238]	1147.15	3	3439.45	3439.45	0	-1.8	1360	Specific	307.49	126.17	126.17	4.81	176	>sp|P01266|THYG_HUMAN Thyroglobulin OS=Homo sapiens OX=9606 GN=TG PE=1 SV=5	17152	20210911_zy_tissue_ethcd_2.5386.5386.3	controllerType=0 controllerNumber=1 scan=5386	24.505
06681:3	1	R.LGVN[+1710.598]VTWK.S	HexNAc(3)Hex(5)NeuAc(1)	N[+1711]	876.379	3	2627.12	2627.12	0	-0.1	1362	Specific	203.48	61.87	61.87	2.49	176	>sp|P01266|THYG_HUMAN Thyroglobulin OS=Homo sapiens OX=9606 GN=TG PE=1 SV=5	17152	20210911_zy_tissue_ethcd_2.7347.7347.3	controllerType=0 controllerNumber=1 scan=7347	33.2512
06794:2	1	R.LGVN[+1054.370]VTWK.S	HexNAc(2)Hex(4)	N[+1054]	985.948	2	1970.89	1970.9	0	-3.1	1362	Specific	217.58	91.26	91.26	2.43	176	>sp|P01266|THYG_HUMAN Thyroglobulin OS=Homo sapiens OX=9606 GN=TG PE=1 SV=5	17152	20210911_zy_tissue_ethcd_2.7471.7471.2	controllerType=0 controllerNumber=1 scan=7471	33.8081
06666:2	1	R.LGVN[+1257.449]VTWK.S	HexNAc(3)Hex(4)	N[+1257]	1087.49	2	2173.97	2173.97	0	-1.1	1362	Specific	229.28	133.73	133.73	4.95	176	>sp|P01266|THYG_HUMAN Thyroglobulin OS=Homo sapiens OX=9606 GN=TG PE=1 SV=5	17152	20210911_zy_tissue_ethcd_2.7330.7330.2	controllerType=0 controllerNumber=1 scan=7330	33.1743
06698:2	1	R.LGVN[+1872.651]VTWK.S	HexNAc(3)Hex(6)NeuAc(1)	N[+1873]	1395.09	2	2789.17	2789.18	0	-1.4	1362	Specific	234.24	28.04	28.04	4.33	176	>sp|P01266|THYG_HUMAN Thyroglobulin OS=Homo sapiens OX=9606 GN=TG PE=1 SV=5	17152	20210911_zy_tissue_ethcd_2.7366.7366.3	controllerType=0 controllerNumber=1 scan=7366	33.3338
06648:2	1	R.LGVN[+1872.651]VTWK.S	HexNAc(3)Hex(6)NeuAc(1)	N[+1873]	1395.09	2	2789.17	2789.18	0	-2.6	1362	Specific	243.65	89.01	89.01	5.05	176	>sp|P01266|THYG_HUMAN Thyroglobulin OS=Homo sapiens OX=9606 GN=TG PE=1 SV=5	17152	20210911_zy_tissue_ethcd_2.7311.7311.2	controllerType=0 controllerNumber=1 scan=7311	33.0854
06638:2	1	R.LGVN[+1913.677]VTWK.S	HexNAc(4)Hex(5)NeuAc(1)	N[+1914]	1415.6	2	2830.2	2830.2	0	-0.2	1362	Specific	251.36	96.53	96.53	4.87	176	>sp|P01266|THYG_HUMAN Thyroglobulin OS=Homo sapiens OX=9606 GN=TG PE=1 SV=5	17152	20210911_zy_tissue_ethcd_2.7300.7300.2	controllerType=0 controllerNumber=1 scan=7300	33.0344
04612:2	1	R.LGVN[+1581.555]VTWK.S	HexNAc(3)Hex(6)	N[+1582]	1249.54	2	2498.08	2498.08	0	-1	1362	Specific	301.66	153.82	153.82	4.94	176	>sp|P01266|THYG_HUMAN Thyroglobulin OS=Homo sapiens OX=9606 GN=TG PE=1 SV=5	17152	20210911_zy_tissue_ethcd_2.5074.5074.2	controllerType=0 controllerNumber=1 scan=5074	23.1166
06659:2	1	R.LGVN[+1216.423]VTWK.S	HexNAc(2)Hex(5)	N[+1216]	1066.98	2	2132.94	2132.95	0	-1.6	1362	Specific	311.29	226.88	226.88	5.28	176	>sp|P01266|THYG_HUMAN Thyroglobulin OS=Homo sapiens OX=9606 GN=TG PE=1 SV=5	17152	20210911_zy_tissue_ethcd_2.7323.7323.2	controllerType=0 controllerNumber=1 scan=7323	33.1404
06670:2	1	R.LGVN[+1054.370]VTWK.S	HexNAc(2)Hex(4)	N[+1054]	985.95	2	1970.89	1970.9	0	-0.8	1362	Specific	405.57	247.97	247.97	4.85	176	>sp|P01266|THYG_HUMAN Thyroglobulin OS=Homo sapiens OX=9606 GN=TG PE=1 SV=5	17152	20210911_zy_tissue_ethcd_2.7335.7335.2	controllerType=0 controllerNumber=1 scan=7335	33.1955
04235:3	1	R.LGVN[+1710.598]VTWKSR.L	HexNAc(3)Hex(5)NeuAc(1)	N[+1711]	957.421	3	2870.25	2870.26	0	-2.5	1362	Specific	301.53	122.01	122.01	4.76	176	>sp|P01266|THYG_HUMAN Thyroglobulin OS=Homo sapiens OX=9606 GN=TG PE=1 SV=5	17152	20210911_zy_tissue_ethcd_2.4661.4661.3	controllerType=0 controllerNumber=1 scan=4661	21.2698
04191:3	1	R.LGVN[+1872.651]VTWKSR.L	HexNAc(3)Hex(6)NeuAc(1)	N[+1873]	1011.44	3	3032.3	3032.31	0	-1.9	1362	Specific	330.81	149.21	149.21	4.35	176	>sp|P01266|THYG_HUMAN Thyroglobulin OS=Homo sapiens OX=9606 GN=TG PE=1 SV=5	17152	20210911_zy_tissue_ethcd_2.4613.4613.3	controllerType=0 controllerNumber=1 scan=4613	21.0482
06594:3	1	R.HFDVAHVSTAATSN[+1540.529]FSAVR.D	HexNAc(2)Hex(7)	N[+1541]	1186.51	3	3557.5	3557.52	0	-4.5	2109	Specific	201.18	136.91	136.91	4.55	176	>sp|P01266|THYG_HUMAN Thyroglobulin OS=Homo sapiens OX=9606 GN=TG PE=1 SV=5	17152	20210911_zy_tissue_ethcd_2.7251.7251.3	controllerType=0 controllerNumber=1 scan=7251	32.8154
06742:3	1	R.HFDVAHVSTAATSN[+1540.529]FSAVR.D	HexNAc(2)Hex(7)	N[+1541]	1186.51	3	3557.51	3557.52	0	-1.4	2109	Specific	201.5	113.3	113.3	5.14	176	>sp|P01266|THYG_HUMAN Thyroglobulin OS=Homo sapiens OX=9606 GN=TG PE=1 SV=5	17152	20210911_zy_tissue_ethcd_2.7414.7414.3	controllerType=0 controllerNumber=1 scan=7414	33.5506
06501:3	1	R.HFDVAHVSTAATSN[+1540.529]FSAVR.D	HexNAc(2)Hex(7)	N[+1541]	1186.51	3	3557.51	3557.52	0	-2.8	2109	Specific	201.75	151.34	151.34	4.7	176	>sp|P01266|THYG_HUMAN Thyroglobulin OS=Homo sapiens OX=9606 GN=TG PE=1 SV=5	17152	20210911_zy_tissue_ethcd_2.7149.7149.3	controllerType=0 controllerNumber=1 scan=7149	32.3552
04384:3	1	R.HFDVAHVSTAATSN[+2026.687]FSAVR.D	HexNAc(2)Hex(10)	N[+2027]	1348.56	3	4043.66	4043.68	0	-3.6	2109	Specific	205.92	126.7	126.7	4.77	176	>sp|P01266|THYG_HUMAN Thyroglobulin OS=Homo sapiens OX=9606 GN=TG PE=1 SV=5	17152	20210911_zy_tissue_ethcd_2.4824.4824.3	controllerType=0 controllerNumber=1 scan=4824	22.0072
06309:3	1	R.HFDVAHVSTAATSN[+1540.529]FSAVR.D	HexNAc(2)Hex(7)	N[+1541]	1186.5	3	3557.5	3557.52	0	-5.5	2109	Specific	206.57	146.65	146.65	4.65	176	>sp|P01266|THYG_HUMAN Thyroglobulin OS=Homo sapiens OX=9606 GN=TG PE=1 SV=5	17152	20210911_zy_tissue_ethcd_2.6938.6938.3	controllerType=0 controllerNumber=1 scan=6938	31.3887
03754:3	1	R.HFDVAHVSTAATSN[+1864.634]FSAVR.D	HexNAc(2)Hex(9)	N[+1865]	1294.54	3	3881.62	3881.62	0	-0.8	2109	Specific	212.22	124.23	124.23	4.89	176	>sp|P01266|THYG_HUMAN Thyroglobulin OS=Homo sapiens OX=9606 GN=TG PE=1 SV=5	17152	20210911_zy_tissue_ethcd_2.4134.4134.3	controllerType=0 controllerNumber=1 scan=4134	18.8963
05892:4	1	R.HFDVAHVSTAATSN[+1702.581]FSAVR.D	HexNAc(2)Hex(8)	N[+1703]	930.648	4	3719.57	3719.57	0	-0.4	2109	Specific	218.08	170.96	170.96	4.47	176	>sp|P01266|THYG_HUMAN Thyroglobulin OS=Homo sapiens OX=9606 GN=TG PE=1 SV=5	17152	20210911_zy_tissue_ethcd_2.6481.6481.4	controllerType=0 controllerNumber=1 scan=6481	29.3095
06589:3	1	R.HFDVAHVSTAATSN[+2059.735]FSAVR.D	HexNAc(4)Hex(5)Fuc(1)NeuAc(1)	N[+2060]	1359.58	3	4076.73	4076.72	0	0.5	2109	Specific	221.99	73.97	73.97	4.16	176	>sp|P01266|THYG_HUMAN Thyroglobulin OS=Homo sapiens OX=9606 GN=TG PE=1 SV=5	17152	20210911_zy_tissue_ethcd_2.7246.7246.3	controllerType=0 controllerNumber=1 scan=7246	32.7926
06316:3	1	R.HFDVAHVSTAATSN[+1540.529]FSAVR.D	HexNAc(2)Hex(7)	N[+1541]	1186.51	3	3557.51	3557.52	0	-0.7	2109	Specific	229.36	165.78	165.78	6.37	176	>sp|P01266|THYG_HUMAN Thyroglobulin OS=Homo sapiens OX=9606 GN=TG PE=1 SV=5	17152	20210911_zy_tissue_ethcd_2.6946.6946.3	controllerType=0 controllerNumber=1 scan=6946	31.424
06102:3	1	R.HFDVAHVSTAATSN[+1702.581]FSAVR.D	HexNAc(2)Hex(8)	N[+1703]	1240.53	3	3719.56	3719.57	0	-2.6	2109	Specific	230.83	130.2	130.2	6.67	176	>sp|P01266|THYG_HUMAN Thyroglobulin OS=Homo sapiens OX=9606 GN=TG PE=1 SV=5	17152	20210911_zy_tissue_ethcd_2.6711.6711.3	controllerType=0 controllerNumber=1 scan=6711	30.3661
05774:3	1	R.HFDVAHVSTAATSN[+1378.476]FSAVR.D	HexNAc(2)Hex(6)	N[+1378]	1132.49	3	3395.46	3395.46	0	-0.5	2109	Specific	231.62	191.19	191.19	6.2	176	>sp|P01266|THYG_HUMAN Thyroglobulin OS=Homo sapiens OX=9606 GN=TG PE=1 SV=5	17152	20210911_zy_tissue_ethcd_2.6351.6351.3	controllerType=0 controllerNumber=1 scan=6351	28.7101
06180:3	1	R.HFDVAHVSTAATSN[+1540.529]FSAVR.D	HexNAc(2)Hex(7)	N[+1541]	1186.5	3	3557.5	3557.52	0	-5.5	2109	Specific	233.03	138.8	138.8	5.74	176	>sp|P01266|THYG_HUMAN Thyroglobulin OS=Homo sapiens OX=9606 GN=TG PE=1 SV=5	17152	20210911_zy_tissue_ethcd_2.6797.6797.3	controllerType=0 controllerNumber=1 scan=6797	30.7539
06048:3	1	R.HFDVAHVSTAATSN[+1702.581]FSAVR.D	HexNAc(2)Hex(8)	N[+1703]	1240.53	3	3719.57	3719.57	0	-0.8	2109	Specific	238.39	199.9	199.9	6.31	176	>sp|P01266|THYG_HUMAN Thyroglobulin OS=Homo sapiens OX=9606 GN=TG PE=1 SV=5	17152	20210911_zy_tissue_ethcd_2.6652.6652.3	controllerType=0 controllerNumber=1 scan=6652	30.096
04800:3	1	R.HFDVAHVSTAATSN[+1864.634]FSAVR.D	HexNAc(2)Hex(9)	N[+1865]	1294.54	3	3881.62	3881.62	0	-1.7	2109	Specific	238.46	229.24	229.24	6.65	176	>sp|P01266|THYG_HUMAN Thyroglobulin OS=Homo sapiens OX=9606 GN=TG PE=1 SV=5	17152	20210911_zy_tissue_ethcd_2.5280.5280.3	controllerType=0 controllerNumber=1 scan=5280	24.0388
06634:3	1	R.HFDVAHVSTAATSN[+1540.529]FSAVR.D	HexNAc(2)Hex(7)	N[+1541]	1186.51	3	3557.51	3557.52	0	-1.4	2109	Specific	240.94	193.13	193.13	6.57	176	>sp|P01266|THYG_HUMAN Thyroglobulin OS=Homo sapiens OX=9606 GN=TG PE=1 SV=5	17152	20210911_zy_tissue_ethcd_2.7295.7295.3	controllerType=0 controllerNumber=1 scan=7295	33.0126
06437:3	1	R.HFDVAHVSTAATSN[+1540.529]FSAVR.D	HexNAc(2)Hex(7)	N[+1541]	1186.51	3	3557.51	3557.52	0	-2.2	2109	Specific	243.67	170.19	170.19	6.58	176	>sp|P01266|THYG_HUMAN Thyroglobulin OS=Homo sapiens OX=9606 GN=TG PE=1 SV=5	17152	20210911_zy_tissue_ethcd_2.7079.7079.3	controllerType=0 controllerNumber=1 scan=7079	32.0344
05821:3	1	R.HFDVAHVSTAATSN[+1378.476]FSAVR.D	HexNAc(2)Hex(6)	N[+1378]	1132.5	3	3395.47	3395.46	0	2.3	2109	Specific	245.02	232.42	232.42	5.45	176	>sp|P01266|THYG_HUMAN Thyroglobulin OS=Homo sapiens OX=9606 GN=TG PE=1 SV=5	17152	20210911_zy_tissue_ethcd_2.6403.6403.3	controllerType=0 controllerNumber=1 scan=6403	28.95
06245:3	1	R.HFDVAHVSTAATSN[+1540.529]FSAVR.D	HexNAc(2)Hex(7)	N[+1541]	1186.51	3	3557.52	3557.52	0	0.4	2109	Specific	250.42	147.87	147.87	5.66	176	>sp|P01266|THYG_HUMAN Thyroglobulin OS=Homo sapiens OX=9606 GN=TG PE=1 SV=5	17152	20210911_zy_tissue_ethcd_2.6868.6868.3	controllerType=0 controllerNumber=1 scan=6868	31.072
05196:3	1	R.HFDVAHVSTAATSN[+2026.687]FSAVR.D	HexNAc(2)Hex(10)	N[+2027]	1348.56	3	4043.66	4043.68	0	-3.6	2109	Specific	253.23	159.82	159.82	6.24	176	>sp|P01266|THYG_HUMAN Thyroglobulin OS=Homo sapiens OX=9606 GN=TG PE=1 SV=5	17152	20210911_zy_tissue_ethcd_2.5717.5717.3	controllerType=0 controllerNumber=1 scan=5717	25.8778
05933:4	1	R.HFDVAHVSTAATSN[+1864.634]FSAVR.D	HexNAc(2)Hex(9)	N[+1865]	971.16	4	3881.62	3881.62	0	-0.8	2109	Specific	257.28	257.28	257.28	6.2	176	>sp|P01266|THYG_HUMAN Thyroglobulin OS=Homo sapiens OX=9606 GN=TG PE=1 SV=5	17152	20210911_zy_tissue_ethcd_2.6526.6526.4	controllerType=0 controllerNumber=1 scan=6526	29.5158
06015:3	1	R.HFDVAHVSTAATSN[+1864.634]FSAVR.D	HexNAc(2)Hex(9)	N[+1865]	1294.54	3	3881.62	3881.62	0	-1.2	2109	Specific	257.81	186.57	186.57	6.32	176	>sp|P01266|THYG_HUMAN Thyroglobulin OS=Homo sapiens OX=9606 GN=TG PE=1 SV=5	17152	20210911_zy_tissue_ethcd_2.6616.6616.3	controllerType=0 controllerNumber=1 scan=6616	29.9286
05851:3	1	R.HFDVAHVSTAATSN[+1702.581]FSAVR.D	HexNAc(2)Hex(8)	N[+1703]	1240.53	3	3719.56	3719.57	0	-1.8	2109	Specific	260.32	207.67	207.67	6.68	176	>sp|P01266|THYG_HUMAN Thyroglobulin OS=Homo sapiens OX=9606 GN=TG PE=1 SV=5	17152	20210911_zy_tissue_ethcd_2.6436.6436.3	controllerType=0 controllerNumber=1 scan=6436	29.1028
06075:3	1	R.HFDVAHVSTAATSN[+1864.634]FSAVR.D	HexNAc(2)Hex(9)	N[+1865]	1294.55	3	3881.62	3881.62	0	-0.4	2109	Specific	261.82	189.18	189.18	6.21	176	>sp|P01266|THYG_HUMAN Thyroglobulin OS=Homo sapiens OX=9606 GN=TG PE=1 SV=5	17152	20210911_zy_tissue_ethcd_2.6682.6682.3	controllerType=0 controllerNumber=1 scan=6682	30.2302
03197:3	1	R.HFDVAHVSTAATSN[+1864.634]FSAVR.D	HexNAc(2)Hex(9)	N[+1865]	1294.55	3	3881.63	3881.62	0	1.1	2109	Specific	262.43	164.74	164.74	5.51	176	>sp|P01266|THYG_HUMAN Thyroglobulin OS=Homo sapiens OX=9606 GN=TG PE=1 SV=5	17152	20210911_zy_tissue_ethcd_2.3523.3523.3	controllerType=0 controllerNumber=1 scan=3523	16.1284
04790:3	1	R.HFDVAHVSTAATSN[+1378.476]FSAVR.D	HexNAc(2)Hex(6)	N[+1378]	1132.49	3	3395.45	3395.46	0	-3.1	2109	Specific	265.47	232.24	232.24	6.34	176	>sp|P01266|THYG_HUMAN Thyroglobulin OS=Homo sapiens OX=9606 GN=TG PE=1 SV=5	17152	20210911_zy_tissue_ethcd_2.5269.5269.3	controllerType=0 controllerNumber=1 scan=5269	23.9883
04804:3	1	R.HFDVAHVSTAATSN[+1378.476]FSAVR.D	HexNAc(2)Hex(6)	N[+1378]	1132.49	3	3395.46	3395.46	0	-2.1	2109	Specific	269.62	227.44	227.44	6.62	176	>sp|P01266|THYG_HUMAN Thyroglobulin OS=Homo sapiens OX=9606 GN=TG PE=1 SV=5	17152	20210911_zy_tissue_ethcd_2.5284.5284.3	controllerType=0 controllerNumber=1 scan=5284	24.0572
06376:3	1	R.HFDVAHVSTAATSN[+1540.529]FSAVR.D	HexNAc(2)Hex(7)	N[+1541]	1186.51	3	3557.51	3557.52	0	-0.9	2109	Specific	273.41	130.43	130.43	6.47	176	>sp|P01266|THYG_HUMAN Thyroglobulin OS=Homo sapiens OX=9606 GN=TG PE=1 SV=5	17152	20210911_zy_tissue_ethcd_2.7012.7012.3	controllerType=0 controllerNumber=1 scan=7012	31.7274
05625:3	1	R.HFDVAHVSTAATSN[+1702.581]FSAVR.D	HexNAc(2)Hex(8)	N[+1703]	1240.53	3	3719.57	3719.57	0	-1	2109	Specific	276.24	198.48	198.48	5.87	176	>sp|P01266|THYG_HUMAN Thyroglobulin OS=Homo sapiens OX=9606 GN=TG PE=1 SV=5	17152	20210911_zy_tissue_ethcd_2.6187.6187.4	controllerType=0 controllerNumber=1 scan=6187	27.9688
03881:3	1	R.HFDVAHVSTAATSN[+1702.581]FSAVR.D	HexNAc(2)Hex(8)	N[+1703]	1240.53	3	3719.56	3719.57	0	-1.6	2109	Specific	291.4	208.76	208.76	6.66	176	>sp|P01266|THYG_HUMAN Thyroglobulin OS=Homo sapiens OX=9606 GN=TG PE=1 SV=5	17152	20210911_zy_tissue_ethcd_2.4273.4273.3	controllerType=0 controllerNumber=1 scan=4273	19.518
04392:3	1	R.HFDVAHVSTAATSN[+2026.687]FSAVR.D	HexNAc(2)Hex(10)	N[+2027]	1348.56	3	4043.68	4043.68	0	1	2109	Specific	294.25	236.53	236.53	5.52	176	>sp|P01266|THYG_HUMAN Thyroglobulin OS=Homo sapiens OX=9606 GN=TG PE=1 SV=5	17152	20210911_zy_tissue_ethcd_2.4833.4833.3	controllerType=0 controllerNumber=1 scan=4833	22.0459
06388:3	1	R.HFDVAHVSTAATSN[+1540.529]FSAVR.D	HexNAc(2)Hex(7)	N[+1541]	1186.51	3	3557.52	3557.52	0	2	2109	Specific	294.35	203.47	203.47	5.45	176	>sp|P01266|THYG_HUMAN Thyroglobulin OS=Homo sapiens OX=9606 GN=TG PE=1 SV=5	17152	20210911_zy_tissue_ethcd_2.7025.7025.3	controllerType=0 controllerNumber=1 scan=7025	31.7882
06854:3	1	R.HFDVAHVSTAATSN[+1540.529]FSAVR.D	HexNAc(2)Hex(7)	N[+1541]	1186.51	3	3557.5	3557.52	0	-3.5	2109	Specific	298.83	175.63	175.63	6.22	176	>sp|P01266|THYG_HUMAN Thyroglobulin OS=Homo sapiens OX=9606 GN=TG PE=1 SV=5	17152	20210911_zy_tissue_ethcd_2.7537.7537.3	controllerType=0 controllerNumber=1 scan=7537	34.1114
05793:3	1	R.HFDVAHVSTAATSN[+1864.634]FSAVR.D	HexNAc(2)Hex(9)	N[+1865]	1294.54	3	3881.62	3881.62	0	-1.1	2109	Specific	300.04	205.24	205.24	6.4	176	>sp|P01266|THYG_HUMAN Thyroglobulin OS=Homo sapiens OX=9606 GN=TG PE=1 SV=5	17152	20210911_zy_tissue_ethcd_2.6372.6372.3	controllerType=0 controllerNumber=1 scan=6372	28.8052
06131:3	1	R.HFDVAHVSTAATSN[+1216.423]FSAVR.D	HexNAc(2)Hex(5)	N[+1216]	1078.47	3	3233.4	3233.41	0	-3	2109	Specific	300.7	229.7	229.7	6.32	176	>sp|P01266|THYG_HUMAN Thyroglobulin OS=Homo sapiens OX=9606 GN=TG PE=1 SV=5	17152	20210911_zy_tissue_ethcd_2.6743.6743.3	controllerType=0 controllerNumber=1 scan=6743	30.511
06268:3	1	R.HFDVAHVSTAATSN[+1540.529]FSAVR.D	HexNAc(2)Hex(7)	N[+1541]	1186.51	3	3557.51	3557.52	0	-1.3	2109	Specific	302.12	213.42	213.42	6.4	176	>sp|P01266|THYG_HUMAN Thyroglobulin OS=Homo sapiens OX=9606 GN=TG PE=1 SV=5	17152	20210911_zy_tissue_ethcd_2.6893.6893.3	controllerType=0 controllerNumber=1 scan=6893	31.1871
05895:3	1	R.HFDVAHVSTAATSN[+1378.476]FSAVR.D	HexNAc(2)Hex(6)	N[+1378]	1132.49	3	3395.45	3395.46	0	-3.6	2109	Specific	313.12	255.83	255.83	6.32	176	>sp|P01266|THYG_HUMAN Thyroglobulin OS=Homo sapiens OX=9606 GN=TG PE=1 SV=5	17152	20210911_zy_tissue_ethcd_2.6484.6484.3	controllerType=0 controllerNumber=1 scan=6484	29.3235
04485:3	1	R.HFDVAHVSTAATSN[+1702.581]FSAVR.D	HexNAc(2)Hex(8)	N[+1703]	1240.53	3	3719.57	3719.57	0	-1.3	2109	Specific	314.08	233.92	233.92	6.37	176	>sp|P01266|THYG_HUMAN Thyroglobulin OS=Homo sapiens OX=9606 GN=TG PE=1 SV=5	17152	20210911_zy_tissue_ethcd_2.4935.4935.3	controllerType=0 controllerNumber=1 scan=4935	22.4962
05631:3	1	R.HFDVAHVSTAATSN[+1864.634]FSAVR.D	HexNAc(2)Hex(9)	N[+1865]	1294.54	3	3881.62	3881.62	0	-1.1	2109	Specific	318.92	218.89	218.89	6.4	176	>sp|P01266|THYG_HUMAN Thyroglobulin OS=Homo sapiens OX=9606 GN=TG PE=1 SV=5	17152	20210911_zy_tissue_ethcd_2.6194.6194.3	controllerType=0 controllerNumber=1 scan=6194	27.997
04888:3	1	R.HFDVAHVSTAATSN[+1702.581]FSAVR.D	HexNAc(2)Hex(8)	N[+1703]	1240.52	3	3719.55	3719.57	0	-4.7	2109	Specific	331.94	264.37	264.37	6.33	176	>sp|P01266|THYG_HUMAN Thyroglobulin OS=Homo sapiens OX=9606 GN=TG PE=1 SV=5	17152	20210911_zy_tissue_ethcd_2.5376.5376.3	controllerType=0 controllerNumber=1 scan=5376	24.46
05611:3	1	R.HFDVAHVSTAATSN[+1216.423]FSAVR.D	HexNAc(2)Hex(5)	N[+1216]	1078.47	3	3233.41	3233.41	0	-1.8	2109	Specific	336.22	271.25	271.25	6.82	176	>sp|P01266|THYG_HUMAN Thyroglobulin OS=Homo sapiens OX=9606 GN=TG PE=1 SV=5	17152	20210911_zy_tissue_ethcd_2.6172.6172.3	controllerType=0 controllerNumber=1 scan=6172	27.8961
06630:3	1	R.HFDVAHVSTAATSN[+1710.598]FSAVR.D	HexNAc(3)Hex(5)NeuAc(1)	N[+1711]	1243.2	3	3727.58	3727.59	0	-0.9	2109	Specific	337.3	217.64	217.64	6.52	176	>sp|P01266|THYG_HUMAN Thyroglobulin OS=Homo sapiens OX=9606 GN=TG PE=1 SV=5	17152	20210911_zy_tissue_ethcd_2.7291.7291.3	controllerType=0 controllerNumber=1 scan=7291	32.9935
04779:3	1	R.HFDVAHVSTAATSN[+1378.476]FSAVR.D	HexNAc(2)Hex(6)	N[+1378]	1132.49	3	3395.46	3395.46	0	-2.5	2109	Specific	340.13	271.41	271.41	6.76	176	>sp|P01266|THYG_HUMAN Thyroglobulin OS=Homo sapiens OX=9606 GN=TG PE=1 SV=5	17152	20210911_zy_tissue_ethcd_2.5257.5257.3	controllerType=0 controllerNumber=1 scan=5257	23.9354
04725:3	1	R.HFDVAHVSTAATSN[+1216.423]FSAVR.D	HexNAc(2)Hex(5)	N[+1216]	1078.47	3	3233.4	3233.41	0	-4.3	2109	Specific	344.37	260.87	260.87	6.34	176	>sp|P01266|THYG_HUMAN Thyroglobulin OS=Homo sapiens OX=9606 GN=TG PE=1 SV=5	17152	20210911_zy_tissue_ethcd_2.5198.5198.3	controllerType=0 controllerNumber=1 scan=5198	23.67
03895:3	1	R.HFDVAHVSTAATSN[+1540.529]FSAVR.D	HexNAc(2)Hex(7)	N[+1541]	1186.51	3	3557.51	3557.52	0	-1.9	2109	Specific	346.83	296.79	296.79	6.9	176	>sp|P01266|THYG_HUMAN Thyroglobulin OS=Homo sapiens OX=9606 GN=TG PE=1 SV=5	17152	20210911_zy_tissue_ethcd_2.4288.4288.3	controllerType=0 controllerNumber=1 scan=4288	19.5854
04681:3	1	R.HFDVAHVSTAATSN[+1864.634]FSAVR.D	HexNAc(2)Hex(9)	N[+1865]	1294.54	3	3881.62	3881.62	0	-1.4	2109	Specific	347.39	248.14	248.14	6.83	176	>sp|P01266|THYG_HUMAN Thyroglobulin OS=Homo sapiens OX=9606 GN=TG PE=1 SV=5	17152	20210911_zy_tissue_ethcd_2.5149.5149.3	controllerType=0 controllerNumber=1 scan=5149	23.4553
05802:3	1	R.HFDVAHVSTAATSN[+1702.581]FSAVR.D	HexNAc(2)Hex(8)	N[+1703]	1240.53	3	3719.56	3719.57	0	-1.7	2109	Specific	349.57	251.85	251.85	6.83	176	>sp|P01266|THYG_HUMAN Thyroglobulin OS=Homo sapiens OX=9606 GN=TG PE=1 SV=5	17152	20210911_zy_tissue_ethcd_2.6382.6382.3	controllerType=0 controllerNumber=1 scan=6382	28.851
04441:3	1	R.HFDVAHVSTAATSN[+1864.634]FSAVR.D	HexNAc(2)Hex(9)	N[+1865]	1294.54	3	3881.62	3881.62	0	-1.3	2109	Specific	353.13	272.28	272.28	6.56	176	>sp|P01266|THYG_HUMAN Thyroglobulin OS=Homo sapiens OX=9606 GN=TG PE=1 SV=5	17152	20210911_zy_tissue_ethcd_2.4887.4887.3	controllerType=0 controllerNumber=1 scan=4887	22.2848
05106:3	1	R.HFDVAHVSTAATSN[+2026.687]FSAVR.D	HexNAc(2)Hex(10)	N[+2027]	1348.56	3	4043.66	4043.68	0	-3.1	2109	Specific	360.43	257.77	257.77	6.41	176	>sp|P01266|THYG_HUMAN Thyroglobulin OS=Homo sapiens OX=9606 GN=TG PE=1 SV=5	17152	20210911_zy_tissue_ethcd_2.5619.5619.3	controllerType=0 controllerNumber=1 scan=5619	25.4682
05577:3	1	R.HFDVAHVSTAATSN[+1378.476]FSAVR.D	HexNAc(2)Hex(6)	N[+1378]	1132.49	3	3395.46	3395.46	0	-1.6	2109	Specific	364.18	276.4	276.4	6.71	176	>sp|P01266|THYG_HUMAN Thyroglobulin OS=Homo sapiens OX=9606 GN=TG PE=1 SV=5	17152	20210911_zy_tissue_ethcd_2.6134.6134.3	controllerType=0 controllerNumber=1 scan=6134	27.7241
06065:3	1	R.HFDVAHVSTAATSN[+1378.476]FSAVR.D	HexNAc(2)Hex(6)	N[+1378]	1132.49	3	3395.46	3395.46	0	-2.6	2109	Specific	365.3	308.13	308.13	6.74	176	>sp|P01266|THYG_HUMAN Thyroglobulin OS=Homo sapiens OX=9606 GN=TG PE=1 SV=5	17152	20210911_zy_tissue_ethcd_2.6671.6671.3	controllerType=0 controllerNumber=1 scan=6671	30.1839
05721:3	1	R.HFDVAHVSTAATSN[+1702.581]FSAVR.D	HexNAc(2)Hex(8)	N[+1703]	1240.53	3	3719.56	3719.57	0	-1.8	2109	Specific	368.19	261.92	261.92	6.72	176	>sp|P01266|THYG_HUMAN Thyroglobulin OS=Homo sapiens OX=9606 GN=TG PE=1 SV=5	17152	20210911_zy_tissue_ethcd_2.6293.6293.3	controllerType=0 controllerNumber=1 scan=6293	28.447
04996:3	1	R.HFDVAHVSTAATSN[+1864.634]FSAVR.D	HexNAc(2)Hex(9)	N[+1865]	1294.54	3	3881.62	3881.62	0	-1	2109	Specific	369.01	327.84	327.84	6.57	176	>sp|P01266|THYG_HUMAN Thyroglobulin OS=Homo sapiens OX=9606 GN=TG PE=1 SV=5	17152	20210911_zy_tissue_ethcd_2.5497.5497.2	controllerType=0 controllerNumber=1 scan=5497	24.9697
04727:3	1	R.HFDVAHVSTAATSN[+1702.581]FSAVR.D	HexNAc(2)Hex(8)	N[+1703]	1240.53	3	3719.57	3719.57	0	-0.1	2109	Specific	371.48	266.66	266.66	6.35	176	>sp|P01266|THYG_HUMAN Thyroglobulin OS=Homo sapiens OX=9606 GN=TG PE=1 SV=5	17152	20210911_zy_tissue_ethcd_2.5200.5200.3	controllerType=0 controllerNumber=1 scan=5200	23.6792
05124:3	1	R.HFDVAHVSTAATSN[+1540.529]FSAVR.D	HexNAc(2)Hex(7)	N[+1541]	1186.51	3	3557.51	3557.52	0	-2.1	2109	Specific	372.3	345.4	345.4	6.84	176	>sp|P01266|THYG_HUMAN Thyroglobulin OS=Homo sapiens OX=9606 GN=TG PE=1 SV=5	17152	20210911_zy_tissue_ethcd_2.5639.5639.2	controllerType=0 controllerNumber=1 scan=5639	25.5463
05332:4	1	R.HFDVAHVSTAATSN[+1702.581]FSAVR.D	HexNAc(2)Hex(8)	N[+1703]	930.647	4	3719.56	3719.57	0	-1.4	2109	Specific	372.99	322.61	322.61	6.56	176	>sp|P01266|THYG_HUMAN Thyroglobulin OS=Homo sapiens OX=9606 GN=TG PE=1 SV=5	17152	20210911_zy_tissue_ethcd_2.5866.5866.4	controllerType=0 controllerNumber=1 scan=5866	26.5184
03230:3	1	R.HFDVAHVSTAATSN[+1540.529]FSAVR.D	HexNAc(2)Hex(7)	N[+1541]	1186.51	3	3557.51	3557.52	0	-3.1	2109	Specific	373.9	259.3	259.3	6.41	176	>sp|P01266|THYG_HUMAN Thyroglobulin OS=Homo sapiens OX=9606 GN=TG PE=1 SV=5	17152	20210911_zy_tissue_ethcd_2.3559.3559.3	controllerType=0 controllerNumber=1 scan=3559	16.2938
06569:3	1	R.HFDVAHVSTAATSN[+2059.735]FSAVR.D	HexNAc(4)Hex(5)Fuc(1)NeuAc(1)	N[+2060]	1359.58	3	4076.73	4076.72	0	2.3	2109	Specific	377.71	228.05	228.05	5.44	176	>sp|P01266|THYG_HUMAN Thyroglobulin OS=Homo sapiens OX=9606 GN=TG PE=1 SV=5	17152	20210911_zy_tissue_ethcd_2.7224.7224.3	controllerType=0 controllerNumber=1 scan=7224	32.6911
04845:3	1	R.HFDVAHVSTAATSN[+1216.423]FSAVR.D	HexNAc(2)Hex(5)	N[+1216]	1078.47	3	3233.41	3233.41	0	-1.3	2109	Specific	382.58	292.79	292.79	6.62	176	>sp|P01266|THYG_HUMAN Thyroglobulin OS=Homo sapiens OX=9606 GN=TG PE=1 SV=5	17152	20210911_zy_tissue_ethcd_2.5329.5329.3	controllerType=0 controllerNumber=1 scan=5329	24.256
05485:3	1	R.HFDVAHVSTAATSN[+1864.634]FSAVR.D	HexNAc(2)Hex(9)	N[+1865]	1294.54	3	3881.61	3881.62	0	-2.5	2109	Specific	387.76	272.32	272.32	6.75	176	>sp|P01266|THYG_HUMAN Thyroglobulin OS=Homo sapiens OX=9606 GN=TG PE=1 SV=5	17152	20210911_zy_tissue_ethcd_2.6034.6034.3	controllerType=0 controllerNumber=1 scan=6034	27.2797
06055:3	1	R.HFDVAHVSTAATSN[+1702.581]FSAVR.D	HexNAc(2)Hex(8)	N[+1703]	1240.52	3	3719.55	3719.57	0	-4.3	2109	Specific	389.64	266.23	266.23	6.33	176	>sp|P01266|THYG_HUMAN Thyroglobulin OS=Homo sapiens OX=9606 GN=TG PE=1 SV=5	17152	20210911_zy_tissue_ethcd_2.6660.6660.3	controllerType=0 controllerNumber=1 scan=6660	30.1314
05913:3	1	R.HFDVAHVSTAATSN[+1540.529]FSAVR.D	HexNAc(2)Hex(7)	N[+1541]	1186.51	3	3557.52	3557.52	0	-0.2	2109	Specific	391.61	330.93	330.93	6.55	176	>sp|P01266|THYG_HUMAN Thyroglobulin OS=Homo sapiens OX=9606 GN=TG PE=1 SV=5	17152	20210911_zy_tissue_ethcd_2.6504.6504.3	controllerType=0 controllerNumber=1 scan=6504	29.4144
05042:3	1	R.HFDVAHVSTAATSN[+1540.529]FSAVR.D	HexNAc(2)Hex(7)	N[+1541]	1186.51	3	3557.51	3557.52	0	-2	2109	Specific	391.83	344.35	344.35	6.99	176	>sp|P01266|THYG_HUMAN Thyroglobulin OS=Homo sapiens OX=9606 GN=TG PE=1 SV=5	17152	20210911_zy_tissue_ethcd_2.5548.5548.2	controllerType=0 controllerNumber=1 scan=5548	25.1761
04551:4	1	R.HFDVAHVSTAATSN[+1540.529]FSAVR.D	HexNAc(2)Hex(7)	N[+1541]	890.132	4	3557.51	3557.52	0	-2.8	2109	Specific	392.78	355.18	355.18	6.39	176	>sp|P01266|THYG_HUMAN Thyroglobulin OS=Homo sapiens OX=9606 GN=TG PE=1 SV=5	17152	20210911_zy_tissue_ethcd_2.5007.5007.3	controllerType=0 controllerNumber=1 scan=5007	22.8168
04495:3	1	R.HFDVAHVSTAATSN[+1540.529]FSAVR.D	HexNAc(2)Hex(7)	N[+1541]	1186.51	3	3557.51	3557.52	0	-1.5	2109	Specific	393.79	357.02	357.02	7.21	176	>sp|P01266|THYG_HUMAN Thyroglobulin OS=Homo sapiens OX=9606 GN=TG PE=1 SV=5	17152	20210911_zy_tissue_ethcd_2.4946.4946.3	controllerType=0 controllerNumber=1 scan=4946	22.5449
05680:4	1	R.HFDVAHVSTAATSN[+1216.423]FSAVR.D	HexNAc(2)Hex(5)	N[+1216]	809.108	4	3233.41	3233.41	0	0	2109	Specific	406.58	374.16	374.16	6.03	176	>sp|P01266|THYG_HUMAN Thyroglobulin OS=Homo sapiens OX=9606 GN=TG PE=1 SV=5	17152	20210911_zy_tissue_ethcd_2.6248.6248.4	controllerType=0 controllerNumber=1 scan=6248	28.241
05702:3	1	R.HFDVAHVSTAATSN[+1864.634]FSAVR.D	HexNAc(2)Hex(9)	N[+1865]	1294.55	3	3881.63	3881.62	0	0.8	2109	Specific	409.31	287.2	287.2	5.68	176	>sp|P01266|THYG_HUMAN Thyroglobulin OS=Homo sapiens OX=9606 GN=TG PE=1 SV=5	17152	20210911_zy_tissue_ethcd_2.6272.6272.3	controllerType=0 controllerNumber=1 scan=6272	28.3525
05782:3	1	R.HFDVAHVSTAATSN[+1702.581]FSAVR.D	HexNAc(2)Hex(8)	N[+1703]	1240.53	3	3719.57	3719.57	0	-0.9	2109	Specific	411.67	312.02	312.02	6.66	176	>sp|P01266|THYG_HUMAN Thyroglobulin OS=Homo sapiens OX=9606 GN=TG PE=1 SV=5	17152	20210911_zy_tissue_ethcd_2.6360.6360.3	controllerType=0 controllerNumber=1 scan=6360	28.7493
04640:3	1	R.HFDVAHVSTAATSN[+1702.581]FSAVR.D	HexNAc(2)Hex(8)	N[+1703]	1240.53	3	3719.56	3719.57	0	-1.4	2109	Specific	411.94	297.87	297.87	6.88	176	>sp|P01266|THYG_HUMAN Thyroglobulin OS=Homo sapiens OX=9606 GN=TG PE=1 SV=5	17152	20210911_zy_tissue_ethcd_2.5104.5104.3	controllerType=0 controllerNumber=1 scan=5104	23.2496
05229:2	1	R.HFDVAHVSTAATSN[+1378.476]FSAVR.D	HexNAc(2)Hex(6)	N[+1378]	1698.23	2	3395.46	3395.46	0	-2.5	2109	Specific	414.61	295.69	295.69	6.21	176	>sp|P01266|THYG_HUMAN Thyroglobulin OS=Homo sapiens OX=9606 GN=TG PE=1 SV=5	17152	20210911_zy_tissue_ethcd_2.5753.5753.4	controllerType=0 controllerNumber=1 scan=5753	26.0295
05710:3	1	R.HFDVAHVSTAATSN[+1702.581]FSAVR.D	HexNAc(2)Hex(8)	N[+1703]	1240.53	3	3719.57	3719.57	0	-0.3	2109	Specific	414.82	342.3	342.3	6.6	176	>sp|P01266|THYG_HUMAN Thyroglobulin OS=Homo sapiens OX=9606 GN=TG PE=1 SV=5	17152	20210911_zy_tissue_ethcd_2.6281.6281.3	controllerType=0 controllerNumber=1 scan=6281	28.3921
05709:3	1	R.HFDVAHVSTAATSN[+1378.476]FSAVR.D	HexNAc(2)Hex(6)	N[+1378]	1132.49	3	3395.46	3395.46	0	-1.7	2109	Specific	420.39	363.96	363.96	7.21	176	>sp|P01266|THYG_HUMAN Thyroglobulin OS=Homo sapiens OX=9606 GN=TG PE=1 SV=5	17152	20210911_zy_tissue_ethcd_2.6280.6280.3	controllerType=0 controllerNumber=1 scan=6280	28.3875
05866:3	1	R.HFDVAHVSTAATSN[+1216.423]FSAVR.D	HexNAc(2)Hex(5)	N[+1216]	1078.47	3	3233.4	3233.41	0	-2.5	2109	Specific	422.06	333.1	333.1	6.87	176	>sp|P01266|THYG_HUMAN Thyroglobulin OS=Homo sapiens OX=9606 GN=TG PE=1 SV=5	17152	20210911_zy_tissue_ethcd_2.6452.6452.3	controllerType=0 controllerNumber=1 scan=6452	29.1756
05138:3	1	R.HFDVAHVSTAATSN[+1702.581]FSAVR.D	HexNAc(2)Hex(8)	N[+1703]	1240.53	3	3719.57	3719.57	0	-1.2	2109	Specific	428.79	408.98	408.98	7.92	176	>sp|P01266|THYG_HUMAN Thyroglobulin OS=Homo sapiens OX=9606 GN=TG PE=1 SV=5	17152	20210911_zy_tissue_ethcd_2.5654.5654.2	controllerType=0 controllerNumber=1 scan=5654	25.6078
04529:3	1	R.HFDVAHVSTAATSN[+2026.687]FSAVR.D	HexNAc(2)Hex(10)	N[+2027]	1348.56	3	4043.67	4043.68	0	-1.7	2109	Specific	429.59	330.4	330.4	6.95	176	>sp|P01266|THYG_HUMAN Thyroglobulin OS=Homo sapiens OX=9606 GN=TG PE=1 SV=5	17152	20210911_zy_tissue_ethcd_2.4983.4983.3	controllerType=0 controllerNumber=1 scan=4983	22.7117
05780:3	1	R.HFDVAHVSTAATSN[+1540.529]FSAVR.D	HexNAc(2)Hex(7)	N[+1541]	1186.51	3	3557.52	3557.52	0	0.1	2109	Specific	430.65	321.97	321.97	6.04	176	>sp|P01266|THYG_HUMAN Thyroglobulin OS=Homo sapiens OX=9606 GN=TG PE=1 SV=5	17152	20210911_zy_tissue_ethcd_2.6358.6358.3	controllerType=0 controllerNumber=1 scan=6358	28.7401
05712:3	1	R.HFDVAHVSTAATSN[+1540.529]FSAVR.D	HexNAc(2)Hex(7)	N[+1541]	1186.51	3	3557.51	3557.52	0	-2.4	2109	Specific	434.39	327.95	327.95	6.9	176	>sp|P01266|THYG_HUMAN Thyroglobulin OS=Homo sapiens OX=9606 GN=TG PE=1 SV=5	17152	20210911_zy_tissue_ethcd_2.6283.6283.3	controllerType=0 controllerNumber=1 scan=6283	28.4013
04813:3	1	R.HFDVAHVSTAATSN[+1540.529]FSAVR.D	HexNAc(2)Hex(7)	N[+1541]	1186.51	3	3557.51	3557.52	0	-1.9	2109	Specific	455.14	356.03	356.03	7.3	176	>sp|P01266|THYG_HUMAN Thyroglobulin OS=Homo sapiens OX=9606 GN=TG PE=1 SV=5	17152	20210911_zy_tissue_ethcd_2.5294.5294.3	controllerType=0 controllerNumber=1 scan=5294	24.1023
04744:3	1	R.HFDVAHVSTAATSN[+1540.529]FSAVR.D	HexNAc(2)Hex(7)	N[+1541]	1186.51	3	3557.51	3557.52	0	-1.2	2109	Specific	480.47	401.68	401.68	7.97	176	>sp|P01266|THYG_HUMAN Thyroglobulin OS=Homo sapiens OX=9606 GN=TG PE=1 SV=5	17152	20210911_zy_tissue_ethcd_2.5218.5218.3	controllerType=0 controllerNumber=1 scan=5218	23.7619
05640:3	1	R.HFDVAHVSTAATSN[+1378.476]FSAVR.D	HexNAc(2)Hex(6)	N[+1378]	1132.49	3	3395.46	3395.46	0	-2.7	2109	Specific	484.34	410.25	410.25	7.91	176	>sp|P01266|THYG_HUMAN Thyroglobulin OS=Homo sapiens OX=9606 GN=TG PE=1 SV=5	17152	20210911_zy_tissue_ethcd_2.6204.6204.3	controllerType=0 controllerNumber=1 scan=6204	28.0431
05571:3	1	R.HFDVAHVSTAATSN[+1540.529]FSAVR.D	HexNAc(2)Hex(7)	N[+1541]	1186.51	3	3557.51	3557.52	0	-1	2109	Specific	492.57	411.22	411.22	8.03	176	>sp|P01266|THYG_HUMAN Thyroglobulin OS=Homo sapiens OX=9606 GN=TG PE=1 SV=5	17152	20210911_zy_tissue_ethcd_2.6128.6128.3	controllerType=0 controllerNumber=1 scan=6128	27.6965
04994:3	1	R.HFDVAHVSTAATSN[+1702.581]FSAVR.D	HexNAc(2)Hex(8)	N[+1703]	1240.53	3	3719.56	3719.57	0	-1.4	2109	Specific	493.91	431.72	431.72	8.29	176	>sp|P01266|THYG_HUMAN Thyroglobulin OS=Homo sapiens OX=9606 GN=TG PE=1 SV=5	17152	20210911_zy_tissue_ethcd_2.5495.5495.2	controllerType=0 controllerNumber=1 scan=5495	24.963
04873:3	1	R.HFDVAHVSTAATSN[+1378.476]FSAVR.D	HexNAc(2)Hex(6)	N[+1378]	1132.49	3	3395.46	3395.46	0	-2.2	2109	Specific	498.26	411.68	411.68	8.24	176	>sp|P01266|THYG_HUMAN Thyroglobulin OS=Homo sapiens OX=9606 GN=TG PE=1 SV=5	17152	20210911_zy_tissue_ethcd_2.5360.5360.3	controllerType=0 controllerNumber=1 scan=5360	24.3893
05059:3	1	R.HFDVAHVSTAATSN[+1702.581]FSAVR.D	HexNAc(2)Hex(8)	N[+1703]	1240.53	3	3719.56	3719.57	0	-1.9	2109	Specific	498.92	424.13	424.13	8.29	176	>sp|P01266|THYG_HUMAN Thyroglobulin OS=Homo sapiens OX=9606 GN=TG PE=1 SV=5	17152	20210911_zy_tissue_ethcd_2.5567.5567.2	controllerType=0 controllerNumber=1 scan=5567	25.2477
05098:3	1	R.HFDVAHVSTAATSN[+2026.687]FSAVR.D	HexNAc(2)Hex(10)	N[+2027]	1348.9	3	4044.68	4043.68	1	1.2	2109	Specific	502.68	392.19	392.19	7.17	176	>sp|P01266|THYG_HUMAN Thyroglobulin OS=Homo sapiens OX=9606 GN=TG PE=1 SV=5	17152	20210911_zy_tissue_ethcd_2.5610.5610.3	controllerType=0 controllerNumber=1 scan=5610	25.4302
05841:3	1	R.HFDVAHVSTAATSN[+1540.529]FSAVR.D	HexNAc(2)Hex(7)	N[+1541]	1186.51	3	3557.51	3557.52	0	-3.4	2109	Specific	508.29	399.42	399.42	7.9	176	>sp|P01266|THYG_HUMAN Thyroglobulin OS=Homo sapiens OX=9606 GN=TG PE=1 SV=5	17152	20210911_zy_tissue_ethcd_2.6425.6425.3	controllerType=0 controllerNumber=1 scan=6425	29.0525
05422:3	1	R.HFDVAHVSTAATSN[+1702.581]FSAVR.D	HexNAc(2)Hex(8)	N[+1703]	1240.52	3	3719.55	3719.57	0	-4.5	2109	Specific	515.14	382.65	382.65	7.96	176	>sp|P01266|THYG_HUMAN Thyroglobulin OS=Homo sapiens OX=9606 GN=TG PE=1 SV=5	17152	20210911_zy_tissue_ethcd_2.5965.5965.3	controllerType=0 controllerNumber=1 scan=5965	26.9649
05630:3	1	R.HFDVAHVSTAATSN[+406.159]FSAVR.D	HexNAc(2)	N[+406]	808.386	3	2423.14	2423.15	0	-2.1	2109	Specific	522.57	480.62	480.62	8.39	176	>sp|P01266|THYG_HUMAN Thyroglobulin OS=Homo sapiens OX=9606 GN=TG PE=1 SV=5	17152	20210911_zy_tissue_ethcd_2.6193.6193.3	controllerType=0 controllerNumber=1 scan=6193	27.9924
05497:3	1	R.HFDVAHVSTAATSN[+1540.529]FSAVR.D	HexNAc(2)Hex(7)	N[+1541]	1186.51	3	3557.51	3557.52	0	-1.8	2109	Specific	534.65	424.16	424.16	8.41	176	>sp|P01266|THYG_HUMAN Thyroglobulin OS=Homo sapiens OX=9606 GN=TG PE=1 SV=5	17152	20210911_zy_tissue_ethcd_2.6047.6047.3	controllerType=0 controllerNumber=1 scan=6047	27.3386
04402:4	1	R.HFDVAHVSTAATSN[+1702.581]FSAVR.D	HexNAc(2)Hex(8)	N[+1703]	930.646	4	3719.56	3719.57	0	-1.6	2109	Specific	537.14	442.97	442.97	8.13	176	>sp|P01266|THYG_HUMAN Thyroglobulin OS=Homo sapiens OX=9606 GN=TG PE=1 SV=5	17152	20210911_zy_tissue_ethcd_2.4844.4844.4	controllerType=0 controllerNumber=1 scan=4844	22.0953
05441:3	1	R.HFDVAHVSTAATSN[+1378.476]FSAVR.D	HexNAc(2)Hex(6)	N[+1378]	1132.49	3	3395.45	3395.46	0	-2.8	2109	Specific	540.44	452.28	452.28	8.09	176	>sp|P01266|THYG_HUMAN Thyroglobulin OS=Homo sapiens OX=9606 GN=TG PE=1 SV=5	17152	20210911_zy_tissue_ethcd_2.5986.5986.3	controllerType=0 controllerNumber=1 scan=5986	27.0619
04854:3	1	R.HFDVAHVSTAATSN[+1378.476]FSAVR.D	HexNAc(2)Hex(6)	N[+1378]	1132.49	3	3395.46	3395.46	0	-2.7	2109	Specific	541.25	453.76	453.76	8.09	176	>sp|P01266|THYG_HUMAN Thyroglobulin OS=Homo sapiens OX=9606 GN=TG PE=1 SV=5	17152	20210911_zy_tissue_ethcd_2.5339.5339.3	controllerType=0 controllerNumber=1 scan=5339	24.2992
04462:3	1	R.HFDVAHVSTAATSN[+1702.581]FSAVR.D	HexNAc(2)Hex(8)	N[+1703]	1240.53	3	3719.56	3719.57	0	-2	2109	Specific	543.9	447.27	447.27	8.35	176	>sp|P01266|THYG_HUMAN Thyroglobulin OS=Homo sapiens OX=9606 GN=TG PE=1 SV=5	17152	20210911_zy_tissue_ethcd_2.4910.4910.3	controllerType=0 controllerNumber=1 scan=4910	22.3851
05425:4	1	R.HFDVAHVSTAATSN[+1864.634]FSAVR.D	HexNAc(2)Hex(9)	N[+1865]	971.158	4	3881.61	3881.62	0	-3.1	2109	Specific	547.35	451.23	451.23	7.82	176	>sp|P01266|THYG_HUMAN Thyroglobulin OS=Homo sapiens OX=9606 GN=TG PE=1 SV=5	17152	20210911_zy_tissue_ethcd_2.5968.5968.4	controllerType=0 controllerNumber=1 scan=5968	26.9787
05569:3	1	R.HFDVAHVSTAATSN[+1864.634]FSAVR.D	HexNAc(2)Hex(9)	N[+1865]	1294.54	3	3881.62	3881.62	0	-1.4	2109	Specific	551.05	421.48	421.48	8.41	176	>sp|P01266|THYG_HUMAN Thyroglobulin OS=Homo sapiens OX=9606 GN=TG PE=1 SV=5	17152	20210911_zy_tissue_ethcd_2.6126.6126.3	controllerType=0 controllerNumber=1 scan=6126	27.6864
04807:3	1	R.HFDVAHVSTAATSN[+1702.581]FSAVR.D	HexNAc(2)Hex(8)	N[+1703]	1240.53	3	3719.56	3719.57	0	-1.7	2109	Specific	551.5	436.04	436.04	8.41	176	>sp|P01266|THYG_HUMAN Thyroglobulin OS=Homo sapiens OX=9606 GN=TG PE=1 SV=5	17152	20210911_zy_tissue_ethcd_2.5288.5288.3	controllerType=0 controllerNumber=1 scan=5288	24.0733
06005:3	1	R.HFDVAHVSTAATSN[+1216.423]FSAVR.D	HexNAc(2)Hex(5)	N[+1216]	1078.47	3	3233.41	3233.41	0	-1.7	2109	Specific	556.92	494.07	494.07	8.6	176	>sp|P01266|THYG_HUMAN Thyroglobulin OS=Homo sapiens OX=9606 GN=TG PE=1 SV=5	17152	20210911_zy_tissue_ethcd_2.6605.6605.3	controllerType=0 controllerNumber=1 scan=6605	29.8768
06064:3	1	R.HFDVAHVSTAATSN[+1216.423]FSAVR.D	HexNAc(2)Hex(5)	N[+1216]	1078.47	3	3233.4	3233.41	0	-3	2109	Specific	559.19	459.39	459.39	8.28	176	>sp|P01266|THYG_HUMAN Thyroglobulin OS=Homo sapiens OX=9606 GN=TG PE=1 SV=5	17152	20210911_zy_tissue_ethcd_2.6670.6670.3	controllerType=0 controllerNumber=1 scan=6670	30.1789
06002:3	1	R.HFDVAHVSTAATSN[+1378.476]FSAVR.D	HexNAc(2)Hex(6)	N[+1378]	1132.49	3	3395.46	3395.46	0	-1.9	2109	Specific	575.92	502.31	502.31	8.6	176	>sp|P01266|THYG_HUMAN Thyroglobulin OS=Homo sapiens OX=9606 GN=TG PE=1 SV=5	17152	20210911_zy_tissue_ethcd_2.6602.6602.3	controllerType=0 controllerNumber=1 scan=6602	29.8627
05330:3	1	R.HFDVAHVSTAATSN[+1864.634]FSAVR.D	HexNAc(2)Hex(9)	N[+1865]	1294.54	3	3881.62	3881.62	0	-0.7	2109	Specific	583.62	450.5	450.5	9.34	176	>sp|P01266|THYG_HUMAN Thyroglobulin OS=Homo sapiens OX=9606 GN=TG PE=1 SV=5	17152	20210911_zy_tissue_ethcd_2.5864.5864.3	controllerType=0 controllerNumber=1 scan=5864	26.5095
05659:3	1	R.HFDVAHVSTAATSN[+1216.423]FSAVR.D	HexNAc(2)Hex(5)	N[+1216]	1078.47	3	3233.41	3233.41	0	-1.7	2109	Specific	586.73	473.66	473.66	9.6	176	>sp|P01266|THYG_HUMAN Thyroglobulin OS=Homo sapiens OX=9606 GN=TG PE=1 SV=5	17152	20210911_zy_tissue_ethcd_2.6225.6225.3	controllerType=0 controllerNumber=1 scan=6225	28.1367
05638:3	1	R.HFDVAHVSTAATSN[+1540.529]FSAVR.D	HexNAc(2)Hex(7)	N[+1541]	1186.51	3	3557.51	3557.52	0	-1.3	2109	Specific	590.72	492.71	492.71	9.34	176	>sp|P01266|THYG_HUMAN Thyroglobulin OS=Homo sapiens OX=9606 GN=TG PE=1 SV=5	17152	20210911_zy_tissue_ethcd_2.6202.6202.3	controllerType=0 controllerNumber=1 scan=6202	28.0335
05185:4	1	R.HFDVAHVSTAATSN[+1540.529]FSAVR.D	HexNAc(2)Hex(7)	N[+1541]	890.133	4	3557.51	3557.52	0	-2	2109	Specific	591.85	524	524	9.27	176	>sp|P01266|THYG_HUMAN Thyroglobulin OS=Homo sapiens OX=9606 GN=TG PE=1 SV=5	17152	20210911_zy_tissue_ethcd_2.5705.5705.4	controllerType=0 controllerNumber=1 scan=5705	25.8337
05589:3	1	R.HFDVAHVSTAATSN[+1702.581]FSAVR.D	HexNAc(2)Hex(8)	N[+1703]	1240.52	3	3719.56	3719.57	0	-3.1	2109	Specific	594.81	472.73	472.73	9.29	176	>sp|P01266|THYG_HUMAN Thyroglobulin OS=Homo sapiens OX=9606 GN=TG PE=1 SV=5	17152	20210911_zy_tissue_ethcd_2.6148.6148.3	controllerType=0 controllerNumber=1 scan=6148	27.7874
05054:3	1	R.HFDVAHVSTAATSN[+1378.476]FSAVR.D	HexNAc(2)Hex(6)	N[+1378]	1132.49	3	3395.46	3395.46	0	-2.7	2109	Specific	598.68	497.82	497.82	9.29	176	>sp|P01266|THYG_HUMAN Thyroglobulin OS=Homo sapiens OX=9606 GN=TG PE=1 SV=5	17152	20210911_zy_tissue_ethcd_2.5562.5562.3	controllerType=0 controllerNumber=1 scan=5562	25.229
04930:4	1	R.HFDVAHVSTAATSN[+1864.634]FSAVR.D	HexNAc(2)Hex(9)	N[+1865]	971.159	4	3881.61	3881.62	0	-2.4	2109	Specific	603.7	510.5	510.5	10.27	176	>sp|P01266|THYG_HUMAN Thyroglobulin OS=Homo sapiens OX=9606 GN=TG PE=1 SV=5	17152	20210911_zy_tissue_ethcd_2.5422.5422.4	controllerType=0 controllerNumber=1 scan=5422	24.6649
04431:3	1	R.HFDVAHVSTAATSN[+1378.476]FSAVR.D	HexNAc(2)Hex(6)	N[+1378]	1132.49	3	3395.46	3395.46	0	-1.7	2109	Specific	605.66	521.27	521.27	10.6	176	>sp|P01266|THYG_HUMAN Thyroglobulin OS=Homo sapiens OX=9606 GN=TG PE=1 SV=5	17152	20210911_zy_tissue_ethcd_2.4876.4876.3	controllerType=0 controllerNumber=1 scan=4876	22.235
04652:3	1	R.HFDVAHVSTAATSN[+1540.529]FSAVR.D	HexNAc(2)Hex(7)	N[+1541]	1186.51	3	3557.51	3557.52	0	-0.6	2109	Specific	607.12	482.52	482.52	10.23	176	>sp|P01266|THYG_HUMAN Thyroglobulin OS=Homo sapiens OX=9606 GN=TG PE=1 SV=5	17152	20210911_zy_tissue_ethcd_2.5118.5118.3	controllerType=0 controllerNumber=1 scan=5118	23.3109
04547:3	1	R.HFDVAHVSTAATSN[+1702.581]FSAVR.D	HexNAc(2)Hex(8)	N[+1703]	1240.53	3	3719.56	3719.57	0	-1.8	2109	Specific	608.56	495.84	495.84	10.6	176	>sp|P01266|THYG_HUMAN Thyroglobulin OS=Homo sapiens OX=9606 GN=TG PE=1 SV=5	17152	20210911_zy_tissue_ethcd_2.5003.5003.3	controllerType=0 controllerNumber=1 scan=5003	22.798
04390:4	1	R.HFDVAHVSTAATSN[+1864.634]FSAVR.D	HexNAc(2)Hex(9)	N[+1865]	971.159	4	3881.62	3881.62	0	-1.7	2109	Specific	611.08	483.92	483.92	10.32	176	>sp|P01266|THYG_HUMAN Thyroglobulin OS=Homo sapiens OX=9606 GN=TG PE=1 SV=5	17152	20210911_zy_tissue_ethcd_2.4831.4831.5	controllerType=0 controllerNumber=1 scan=4831	22.0372
05971:3	1	R.HFDVAHVSTAATSN[+1702.581]FSAVR.D	HexNAc(2)Hex(8)	N[+1703]	1240.53	3	3719.56	3719.57	0	-2	2109	Specific	611.74	506.66	506.66	10.55	176	>sp|P01266|THYG_HUMAN Thyroglobulin OS=Homo sapiens OX=9606 GN=TG PE=1 SV=5	17152	20210911_zy_tissue_ethcd_2.6568.6568.3	controllerType=0 controllerNumber=1 scan=6568	29.7076
05187:3	1	R.HFDVAHVSTAATSN[+1378.476]FSAVR.D	HexNAc(2)Hex(6)	N[+1378]	1132.49	3	3395.46	3395.46	0	-1.8	2109	Specific	612.43	498.11	498.11	10.6	176	>sp|P01266|THYG_HUMAN Thyroglobulin OS=Homo sapiens OX=9606 GN=TG PE=1 SV=5	17152	20210911_zy_tissue_ethcd_2.5708.5708.3	controllerType=0 controllerNumber=1 scan=5708	25.8425
05121:3	1	R.HFDVAHVSTAATSN[+1378.476]FSAVR.D	HexNAc(2)Hex(6)	N[+1378]	1132.49	3	3395.46	3395.46	0	-1.9	2109	Specific	616.58	516.04	516.04	10.6	176	>sp|P01266|THYG_HUMAN Thyroglobulin OS=Homo sapiens OX=9606 GN=TG PE=1 SV=5	17152	20210911_zy_tissue_ethcd_2.5636.5636.3	controllerType=0 controllerNumber=1 scan=5636	25.539
05318:3	1	R.HFDVAHVSTAATSN[+1378.476]FSAVR.D	HexNAc(2)Hex(6)	N[+1378]	1132.49	3	3395.46	3395.46	0	-2.4	2109	Specific	617.4	531.39	531.39	10.55	176	>sp|P01266|THYG_HUMAN Thyroglobulin OS=Homo sapiens OX=9606 GN=TG PE=1 SV=5	17152	20210911_zy_tissue_ethcd_2.5851.5851.3	controllerType=0 controllerNumber=1 scan=5851	26.4531
04907:3	1	R.HFDVAHVSTAATSN[+1864.634]FSAVR.D	HexNAc(2)Hex(9)	N[+1865]	1294.54	3	3881.62	3881.62	0	-1.6	2109	Specific	617.4	498.04	498.04	10.6	176	>sp|P01266|THYG_HUMAN Thyroglobulin OS=Homo sapiens OX=9606 GN=TG PE=1 SV=5	17152	20210911_zy_tissue_ethcd_2.5397.5397.3	controllerType=0 controllerNumber=1 scan=5397	24.5538
05253:3	1	R.HFDVAHVSTAATSN[+1378.476]FSAVR.D	HexNAc(2)Hex(6)	N[+1378]	1132.49	3	3395.46	3395.46	0	-2.2	2109	Specific	623.62	532.89	532.89	10.55	176	>sp|P01266|THYG_HUMAN Thyroglobulin OS=Homo sapiens OX=9606 GN=TG PE=1 SV=5	17152	20210911_zy_tissue_ethcd_2.5780.5780.3	controllerType=0 controllerNumber=1 scan=5780	26.1478
04494:3	1	R.HFDVAHVSTAATSN[+1378.476]FSAVR.D	HexNAc(2)Hex(6)	N[+1378]	1132.49	3	3395.46	3395.46	0	-2.1	2109	Specific	625.46	529.95	529.95	10.55	176	>sp|P01266|THYG_HUMAN Thyroglobulin OS=Homo sapiens OX=9606 GN=TG PE=1 SV=5	17152	20210911_zy_tissue_ethcd_2.4945.4945.3	controllerType=0 controllerNumber=1 scan=4945	22.5399
05404:3	1	R.HFDVAHVSTAATSN[+1054.370]FSAVR.D	HexNAc(2)Hex(4)	N[+1054]	1024.46	3	3071.35	3071.36	0	-1.7	2109	Specific	629.68	557.47	557.47	10.6	176	>sp|P01266|THYG_HUMAN Thyroglobulin OS=Homo sapiens OX=9606 GN=TG PE=1 SV=5	17152	20210911_zy_tissue_ethcd_2.5945.5945.3	controllerType=0 controllerNumber=1 scan=5945	26.8726
05380:3	1	R.HFDVAHVSTAATSN[+1378.476]FSAVR.D	HexNAc(2)Hex(6)	N[+1378]	1132.49	3	3395.46	3395.46	0	-2.1	2109	Specific	632.56	535.58	535.58	10.55	176	>sp|P01266|THYG_HUMAN Thyroglobulin OS=Homo sapiens OX=9606 GN=TG PE=1 SV=5	17152	20210911_zy_tissue_ethcd_2.5919.5919.3	controllerType=0 controllerNumber=1 scan=5919	26.7547
04398:3	1	R.HFDVAHVSTAATSN[+1702.581]FSAVR.D	HexNAc(2)Hex(8)	N[+1703]	1240.53	3	3719.57	3719.57	0	-1.2	2109	Specific	634.27	562.4	562.4	10.34	176	>sp|P01266|THYG_HUMAN Thyroglobulin OS=Homo sapiens OX=9606 GN=TG PE=1 SV=5	17152	20210911_zy_tissue_ethcd_2.4840.4840.3	controllerType=0 controllerNumber=1 scan=4840	22.0773
04570:3	1	R.HFDVAHVSTAATSN[+1378.476]FSAVR.D	HexNAc(2)Hex(6)	N[+1378]	1132.49	3	3395.45	3395.46	0	-2.8	2109	Specific	635.39	531.96	531.96	10.29	176	>sp|P01266|THYG_HUMAN Thyroglobulin OS=Homo sapiens OX=9606 GN=TG PE=1 SV=5	17152	20210911_zy_tissue_ethcd_2.5028.5028.3	controllerType=0 controllerNumber=1 scan=5028	22.9114
04898:3	1	R.HFDVAHVSTAATSN[+1216.423]FSAVR.D	HexNAc(2)Hex(5)	N[+1216]	1078.47	3	3233.41	3233.41	0	-1.7	2109	Specific	639.82	520.8	520.8	10.6	176	>sp|P01266|THYG_HUMAN Thyroglobulin OS=Homo sapiens OX=9606 GN=TG PE=1 SV=5	17152	20210911_zy_tissue_ethcd_2.5387.5387.3	controllerType=0 controllerNumber=1 scan=5387	24.5096
04735:3	1	R.HFDVAHVSTAATSN[+1864.634]FSAVR.D	HexNAc(2)Hex(9)	N[+1865]	1294.54	3	3881.62	3881.62	0	-1.9	2109	Specific	643.51	524.42	524.42	10.6	176	>sp|P01266|THYG_HUMAN Thyroglobulin OS=Homo sapiens OX=9606 GN=TG PE=1 SV=5	17152	20210911_zy_tissue_ethcd_2.5209.5209.3	controllerType=0 controllerNumber=1 scan=5209	23.719
05255:3	1	R.HFDVAHVSTAATSN[+1702.581]FSAVR.D	HexNAc(2)Hex(8)	N[+1703]	1240.53	3	3719.56	3719.57	0	-1.7	2109	Specific	644.58	532.72	532.72	10.6	176	>sp|P01266|THYG_HUMAN Thyroglobulin OS=Homo sapiens OX=9606 GN=TG PE=1 SV=5	17152	20210911_zy_tissue_ethcd_2.5782.5782.3	controllerType=0 controllerNumber=1 scan=5782	26.1552
04534:3	1	R.HFDVAHVSTAATSN[+1864.634]FSAVR.D	HexNAc(2)Hex(9)	N[+1865]	1294.54	3	3881.62	3881.62	0	-1.8	2109	Specific	646.45	529.82	529.82	10.6	176	>sp|P01266|THYG_HUMAN Thyroglobulin OS=Homo sapiens OX=9606 GN=TG PE=1 SV=5	17152	20210911_zy_tissue_ethcd_2.4988.4988.3	controllerType=0 controllerNumber=1 scan=4988	22.7343
05413:3	1	R.HFDVAHVSTAATSN[+1540.529]FSAVR.D	HexNAc(2)Hex(7)	N[+1541]	1186.51	3	3557.51	3557.52	0	-1.4	2109	Specific	648.04	527.56	527.56	10.6	176	>sp|P01266|THYG_HUMAN Thyroglobulin OS=Homo sapiens OX=9606 GN=TG PE=1 SV=5	17152	20210911_zy_tissue_ethcd_2.5955.5955.3	controllerType=0 controllerNumber=1 scan=5955	26.9178
05006:3	1	R.HFDVAHVSTAATSN[+2026.687]FSAVR.D	HexNAc(2)Hex(10)	N[+2027]	1348.56	3	4043.68	4043.68	0	0.1	2109	Specific	653.14	527.64	527.64	10.69	176	>sp|P01266|THYG_HUMAN Thyroglobulin OS=Homo sapiens OX=9606 GN=TG PE=1 SV=5	17152	20210911_zy_tissue_ethcd_2.5508.5508.3	controllerType=0 controllerNumber=1 scan=5508	25.0144
05870:3	1	R.HFDVAHVSTAATSN[+1864.634]FSAVR.D	HexNAc(2)Hex(9)	N[+1865]	1294.54	3	3881.62	3881.62	0	-1.5	2109	Specific	664.03	519.93	519.93	11.6	176	>sp|P01266|THYG_HUMAN Thyroglobulin OS=Homo sapiens OX=9606 GN=TG PE=1 SV=5	17152	20210911_zy_tissue_ethcd_2.6457.6457.3	controllerType=0 controllerNumber=1 scan=6457	29.1954
05015:3	1	R.HFDVAHVSTAATSN[+1378.476]FSAVR.D	HexNAc(2)Hex(6)	N[+1378]	1132.49	3	3395.46	3395.46	0	-1.9	2109	Specific	665.94	564.98	564.98	11.6	176	>sp|P01266|THYG_HUMAN Thyroglobulin OS=Homo sapiens OX=9606 GN=TG PE=1 SV=5	17152	20210911_zy_tissue_ethcd_2.5518.5518.3	controllerType=0 controllerNumber=1 scan=5518	25.0535
05981:3	1	R.HFDVAHVSTAATSN[+1540.529]FSAVR.D	HexNAc(2)Hex(7)	N[+1541]	1186.51	3	3557.51	3557.52	0	-2.4	2109	Specific	669.46	556.96	556.96	11.55	176	>sp|P01266|THYG_HUMAN Thyroglobulin OS=Homo sapiens OX=9606 GN=TG PE=1 SV=5	17152	20210911_zy_tissue_ethcd_2.6579.6579.3	controllerType=0 controllerNumber=1 scan=6579	29.7569
04429:3	1	R.HFDVAHVSTAATSN[+1540.529]FSAVR.D	HexNAc(2)Hex(7)	N[+1541]	1186.51	3	3557.51	3557.52	0	-1.3	2109	Specific	670.41	554.5	554.5	11.34	176	>sp|P01266|THYG_HUMAN Thyroglobulin OS=Homo sapiens OX=9606 GN=TG PE=1 SV=5	17152	20210911_zy_tissue_ethcd_2.4874.4874.3	controllerType=0 controllerNumber=1 scan=4874	22.2267
04377:3	1	R.HFDVAHVSTAATSN[+1864.634]FSAVR.D	HexNAc(2)Hex(9)	N[+1865]	1294.55	3	3881.62	3881.62	0	-0.6	2109	Specific	670.57	563.13	563.13	11.23	176	>sp|P01266|THYG_HUMAN Thyroglobulin OS=Homo sapiens OX=9606 GN=TG PE=1 SV=5	17152	20210911_zy_tissue_ethcd_2.4817.4817.3	controllerType=0 controllerNumber=1 scan=4817	21.9744
05051:3	1	R.HFDVAHVSTAATSN[+1540.529]FSAVR.D	HexNAc(2)Hex(7)	N[+1541]	1186.51	3	3557.51	3557.52	0	-1.9	2109	Specific	671.19	545.2	545.2	11.6	176	>sp|P01266|THYG_HUMAN Thyroglobulin OS=Homo sapiens OX=9606 GN=TG PE=1 SV=5	17152	20210911_zy_tissue_ethcd_2.5558.5558.3	controllerType=0 controllerNumber=1 scan=5558	25.2196
04921:3	1	R.HFDVAHVSTAATSN[+1540.529]FSAVR.D	HexNAc(2)Hex(7)	N[+1541]	1186.51	3	3557.51	3557.52	0	-2.3	2109	Specific	671.45	555.91	555.91	11.55	176	>sp|P01266|THYG_HUMAN Thyroglobulin OS=Homo sapiens OX=9606 GN=TG PE=1 SV=5	17152	20210911_zy_tissue_ethcd_2.5412.5412.3	controllerType=0 controllerNumber=1 scan=5412	24.6211
04559:3	1	R.HFDVAHVSTAATSN[+1540.529]FSAVR.D	HexNAc(2)Hex(7)	N[+1541]	1186.51	3	3557.51	3557.52	0	-2	2109	Specific	671.87	548.98	548.98	11.6	176	>sp|P01266|THYG_HUMAN Thyroglobulin OS=Homo sapiens OX=9606 GN=TG PE=1 SV=5	17152	20210911_zy_tissue_ethcd_2.5016.5016.3	controllerType=0 controllerNumber=1 scan=5016	22.8564
05123:3	1	R.HFDVAHVSTAATSN[+1864.634]FSAVR.D	HexNAc(2)Hex(9)	N[+1865]	1294.54	3	3881.62	3881.62	0	-1.4	2109	Specific	671.9	544.94	544.94	11.6	176	>sp|P01266|THYG_HUMAN Thyroglobulin OS=Homo sapiens OX=9606 GN=TG PE=1 SV=5	17152	20210911_zy_tissue_ethcd_2.5638.5638.3	controllerType=0 controllerNumber=1 scan=5638	25.5439
04989:3	1	R.HFDVAHVSTAATSN[+1378.476]FSAVR.D	HexNAc(2)Hex(6)	N[+1378]	1132.49	3	3395.45	3395.46	0	-3.3	2109	Specific	671.98	570.12	570.12	11.21	176	>sp|P01266|THYG_HUMAN Thyroglobulin OS=Homo sapiens OX=9606 GN=TG PE=1 SV=5	17152	20210911_zy_tissue_ethcd_2.5489.5489.3	controllerType=0 controllerNumber=1 scan=5489	24.9384
05718:3	1	R.HFDVAHVSTAATSN[+1216.423]FSAVR.D	HexNAc(2)Hex(5)	N[+1216]	1078.47	3	3233.41	3233.41	0	-1.8	2109	Specific	673.97	566.51	566.51	11.6	176	>sp|P01266|THYG_HUMAN Thyroglobulin OS=Homo sapiens OX=9606 GN=TG PE=1 SV=5	17152	20210911_zy_tissue_ethcd_2.6290.6290.3	controllerType=0 controllerNumber=1 scan=6290	28.4328
04985:4	1	R.HFDVAHVSTAATSN[+1864.634]FSAVR.D	HexNAc(2)Hex(9)	N[+1865]	971.159	4	3881.61	3881.62	0	-2.4	2109	Specific	676.39	573.38	573.38	11.27	176	>sp|P01266|THYG_HUMAN Thyroglobulin OS=Homo sapiens OX=9606 GN=TG PE=1 SV=5	17152	20210911_zy_tissue_ethcd_2.5485.5485.3	controllerType=0 controllerNumber=1 scan=5485	24.9238
05189:3	1	R.HFDVAHVSTAATSN[+1864.634]FSAVR.D	HexNAc(2)Hex(9)	N[+1865]	1294.54	3	3881.62	3881.62	0	-0.8	2109	Specific	678.24	540.27	540.27	11.34	176	>sp|P01266|THYG_HUMAN Thyroglobulin OS=Homo sapiens OX=9606 GN=TG PE=1 SV=5	17152	20210911_zy_tissue_ethcd_2.5710.5710.3	controllerType=0 controllerNumber=1 scan=5710	25.8474
05005:3	1	R.HFDVAHVSTAATSN[+1702.581]FSAVR.D	HexNAc(2)Hex(8)	N[+1703]	1240.53	3	3719.56	3719.57	0	-2	2109	Specific	684.12	545.46	545.46	11.55	176	>sp|P01266|THYG_HUMAN Thyroglobulin OS=Homo sapiens OX=9606 GN=TG PE=1 SV=5	17152	20210911_zy_tissue_ethcd_2.5507.5507.3	controllerType=0 controllerNumber=1 scan=5507	25.0121
05035:3	1	R.HFDVAHVSTAATSN[+1864.634]FSAVR.D	HexNAc(2)Hex(9)	N[+1865]	1294.54	3	3881.62	3881.62	0	-1.2	2109	Specific	687.08	562.17	562.17	11.34	176	>sp|P01266|THYG_HUMAN Thyroglobulin OS=Homo sapiens OX=9606 GN=TG PE=1 SV=5	17152	20210911_zy_tissue_ethcd_2.5540.5540.3	controllerType=0 controllerNumber=1 scan=5540	25.1476
04589:3	1	R.HFDVAHVSTAATSN[+1216.423]FSAVR.D	HexNAc(2)Hex(5)	N[+1216]	1078.47	3	3233.4	3233.41	0	-2.1	2109	Specific	688.12	600.28	600.28	11.55	176	>sp|P01266|THYG_HUMAN Thyroglobulin OS=Homo sapiens OX=9606 GN=TG PE=1 SV=5	17152	20210911_zy_tissue_ethcd_2.5049.5049.3	controllerType=0 controllerNumber=1 scan=5049	23.0032
05275:3	1	R.HFDVAHVSTAATSN[+1540.529]FSAVR.D	HexNAc(2)Hex(7)	N[+1541]	1186.51	3	3557.51	3557.52	0	-1.3	2109	Specific	691.68	564.96	564.96	11.34	176	>sp|P01266|THYG_HUMAN Thyroglobulin OS=Homo sapiens OX=9606 GN=TG PE=1 SV=5	17152	20210911_zy_tissue_ethcd_2.5804.5804.3	controllerType=0 controllerNumber=1 scan=5804	26.2492
05134:3	1	R.HFDVAHVSTAATSN[+1540.529]FSAVR.D	HexNAc(2)Hex(7)	N[+1541]	1186.51	3	3557.51	3557.52	0	-2	2109	Specific	691.87	585.02	585.02	11.6	176	>sp|P01266|THYG_HUMAN Thyroglobulin OS=Homo sapiens OX=9606 GN=TG PE=1 SV=5	17152	20210911_zy_tissue_ethcd_2.5650.5650.3	controllerType=0 controllerNumber=1 scan=5650	25.5923
05411:3	1	R.HFDVAHVSTAATSN[+1216.423]FSAVR.D	HexNAc(2)Hex(5)	N[+1216]	1078.47	3	3233.41	3233.41	0	-1.9	2109	Specific	695.01	605.96	605.96	11.6	176	>sp|P01266|THYG_HUMAN Thyroglobulin OS=Homo sapiens OX=9606 GN=TG PE=1 SV=5	17152	20210911_zy_tissue_ethcd_2.5953.5953.3	controllerType=0 controllerNumber=1 scan=5953	26.9081
05350:3	1	R.HFDVAHVSTAATSN[+1540.529]FSAVR.D	HexNAc(2)Hex(7)	N[+1541]	1186.51	3	3557.51	3557.52	0	-2.2	2109	Specific	698.19	588.33	588.33	11.55	176	>sp|P01266|THYG_HUMAN Thyroglobulin OS=Homo sapiens OX=9606 GN=TG PE=1 SV=5	17152	20210911_zy_tissue_ethcd_2.5886.5886.3	controllerType=0 controllerNumber=1 scan=5886	26.6085
04948:3	1	R.HFDVAHVSTAATSN[+1702.581]FSAVR.D	HexNAc(2)Hex(8)	N[+1703]	1240.53	3	3719.57	3719.57	0	-1.2	2109	Specific	699.17	580.2	580.2	11.34	176	>sp|P01266|THYG_HUMAN Thyroglobulin OS=Homo sapiens OX=9606 GN=TG PE=1 SV=5	17152	20210911_zy_tissue_ethcd_2.5442.5442.3	controllerType=0 controllerNumber=1 scan=5442	24.7531
04967:3	1	R.HFDVAHVSTAATSN[+1864.634]FSAVR.D	HexNAc(2)Hex(9)	N[+1865]	1294.54	3	3881.62	3881.62	0	-1.6	2109	Specific	705.61	596.91	596.91	12.6	176	>sp|P01266|THYG_HUMAN Thyroglobulin OS=Homo sapiens OX=9606 GN=TG PE=1 SV=5	17152	20210911_zy_tissue_ethcd_2.5464.5464.3	controllerType=0 controllerNumber=1 scan=5464	24.8356
05349:3	1	R.HFDVAHVSTAATSN[+1216.423]FSAVR.D	HexNAc(2)Hex(5)	N[+1216]	1078.47	3	3233.4	3233.41	0	-2.2	2109	Specific	707.18	592.77	592.77	12.55	176	>sp|P01266|THYG_HUMAN Thyroglobulin OS=Homo sapiens OX=9606 GN=TG PE=1 SV=5	17152	20210911_zy_tissue_ethcd_2.5885.5885.3	controllerType=0 controllerNumber=1 scan=5885	26.6052
05188:3	1	R.HFDVAHVSTAATSN[+1702.581]FSAVR.D	HexNAc(2)Hex(8)	N[+1703]	1240.53	3	3719.57	3719.57	0	-0.9	2109	Specific	707.37	628.24	628.24	12.34	176	>sp|P01266|THYG_HUMAN Thyroglobulin OS=Homo sapiens OX=9606 GN=TG PE=1 SV=5	17152	20210911_zy_tissue_ethcd_2.5709.5709.3	controllerType=0 controllerNumber=1 scan=5709	25.8447
05052:3	1	R.HFDVAHVSTAATSN[+1702.581]FSAVR.D	HexNAc(2)Hex(8)	N[+1703]	1240.53	3	3719.56	3719.57	0	-1.4	2109	Specific	708.42	579.83	579.83	12.6	176	>sp|P01266|THYG_HUMAN Thyroglobulin OS=Homo sapiens OX=9606 GN=TG PE=1 SV=5	17152	20210911_zy_tissue_ethcd_2.5559.5559.3	controllerType=0 controllerNumber=1 scan=5559	25.2219
04983:3	1	R.HFDVAHVSTAATSN[+1540.529]FSAVR.D	HexNAc(2)Hex(7)	N[+1541]	1186.51	3	3557.51	3557.52	0	-2	2109	Specific	716.42	576.78	576.78	12.6	176	>sp|P01266|THYG_HUMAN Thyroglobulin OS=Homo sapiens OX=9606 GN=TG PE=1 SV=5	17152	20210911_zy_tissue_ethcd_2.5483.5483.3	controllerType=0 controllerNumber=1 scan=5483	24.9153
05339:3	1	R.HFDVAHVSTAATSN[+1054.370]FSAVR.D	HexNAc(2)Hex(4)	N[+1054]	1024.46	3	3071.35	3071.36	0	-1.4	2109	Specific	718.86	643.41	643.41	12.6	176	>sp|P01266|THYG_HUMAN Thyroglobulin OS=Homo sapiens OX=9606 GN=TG PE=1 SV=5	17152	20210911_zy_tissue_ethcd_2.5874.5874.3	controllerType=0 controllerNumber=1 scan=5874	26.5535
05254:3	1	R.HFDVAHVSTAATSN[+1864.634]FSAVR.D	HexNAc(2)Hex(9)	N[+1865]	1294.54	3	3881.62	3881.62	0	-1.2	2109	Specific	720.14	585.66	585.66	12.34	176	>sp|P01266|THYG_HUMAN Thyroglobulin OS=Homo sapiens OX=9606 GN=TG PE=1 SV=5	17152	20210911_zy_tissue_ethcd_2.5781.5781.3	controllerType=0 controllerNumber=1 scan=5781	26.1502
05277:3	1	R.HFDVAHVSTAATSN[+1054.370]FSAVR.D	HexNAc(2)Hex(4)	N[+1054]	1024.45	3	3071.35	3071.36	0	-3.3	2109	Specific	721.4	631.58	631.58	12.29	176	>sp|P01266|THYG_HUMAN Thyroglobulin OS=Homo sapiens OX=9606 GN=TG PE=1 SV=5	17152	20210911_zy_tissue_ethcd_2.5806.5806.3	controllerType=0 controllerNumber=1 scan=5806	26.2571
04957:3	1	R.HFDVAHVSTAATSN[+1864.634]FSAVR.D	HexNAc(2)Hex(9)	N[+1865]	1294.54	3	3881.62	3881.62	0	-1.2	2109	Specific	722.19	602.66	602.66	12.34	176	>sp|P01266|THYG_HUMAN Thyroglobulin OS=Homo sapiens OX=9606 GN=TG PE=1 SV=5	17152	20210911_zy_tissue_ethcd_2.5452.5452.3	controllerType=0 controllerNumber=1 scan=5452	24.7919
05155:3	1	R.HFDVAHVSTAATSN[+1216.423]FSAVR.D	HexNAc(2)Hex(5)	N[+1216]	1078.47	3	3233.41	3233.41	0	-1.7	2109	Specific	727.76	613.51	613.51	12.6	176	>sp|P01266|THYG_HUMAN Thyroglobulin OS=Homo sapiens OX=9606 GN=TG PE=1 SV=5	17152	20210911_zy_tissue_ethcd_2.5673.5673.3	controllerType=0 controllerNumber=1 scan=5673	25.6907
05192:3	1	R.HFDVAHVSTAATSN[+1054.370]FSAVR.D	HexNAc(2)Hex(4)	N[+1054]	1024.46	3	3071.35	3071.36	0	-1.3	2109	Specific	728.77	614.73	614.73	12.34	176	>sp|P01266|THYG_HUMAN Thyroglobulin OS=Homo sapiens OX=9606 GN=TG PE=1 SV=5	17152	20210911_zy_tissue_ethcd_2.5713.5713.3	controllerType=0 controllerNumber=1 scan=5713	25.8594
05286:3	1	R.HFDVAHVSTAATSN[+1216.423]FSAVR.D	HexNAc(2)Hex(5)	N[+1216]	1078.47	3	3233.41	3233.41	0	-1.8	2109	Specific	736.86	614.78	614.78	12.6	176	>sp|P01266|THYG_HUMAN Thyroglobulin OS=Homo sapiens OX=9606 GN=TG PE=1 SV=5	17152	20210911_zy_tissue_ethcd_2.5816.5816.3	controllerType=0 controllerNumber=1 scan=5816	26.2995
05101:3	1	R.HFDVAHVSTAATSN[+1054.370]FSAVR.D	HexNAc(2)Hex(4)	N[+1054]	1024.46	3	3071.35	3071.36	0	-2	2109	Specific	737.1	657.28	657.28	12.6	176	>sp|P01266|THYG_HUMAN Thyroglobulin OS=Homo sapiens OX=9606 GN=TG PE=1 SV=5	17152	20210911_zy_tissue_ethcd_2.5614.5614.3	controllerType=0 controllerNumber=1 scan=5614	25.4453
05039:4	1	R.HFDVAHVSTAATSN[+1540.529]FSAVR.D	HexNAc(2)Hex(7)	N[+1541]	890.133	4	3557.51	3557.52	0	-2	2109	Specific	740.1	652.81	652.81	12.27	176	>sp|P01266|THYG_HUMAN Thyroglobulin OS=Homo sapiens OX=9606 GN=TG PE=1 SV=5	17152	20210911_zy_tissue_ethcd_2.5544.5544.4	controllerType=0 controllerNumber=1 scan=5544	25.1642
05221:3	1	R.HFDVAHVSTAATSN[+1216.423]FSAVR.D	HexNAc(2)Hex(5)	N[+1216]	1078.47	3	3233.41	3233.41	0	-1.7	2109	Specific	743.6	639.36	639.36	12.6	176	>sp|P01266|THYG_HUMAN Thyroglobulin OS=Homo sapiens OX=9606 GN=TG PE=1 SV=5	17152	20210911_zy_tissue_ethcd_2.5745.5745.3	controllerType=0 controllerNumber=1 scan=5745	25.9957
05090:3	1	R.HFDVAHVSTAATSN[+1216.423]FSAVR.D	HexNAc(2)Hex(5)	N[+1216]	1078.47	3	3233.4	3233.41	0	-4.5	2109	Specific	744.24	616.6	616.6	12.12	176	>sp|P01266|THYG_HUMAN Thyroglobulin OS=Homo sapiens OX=9606 GN=TG PE=1 SV=5	17152	20210911_zy_tissue_ethcd_2.5602.5602.3	controllerType=0 controllerNumber=1 scan=5602	25.3951
05086:4	1	R.HFDVAHVSTAATSN[+1540.529]FSAVR.D	HexNAc(2)Hex(7)	N[+1541]	890.133	4	3557.51	3557.52	0	-2.2	2109	Specific	744.62	601.39	601.39	12.27	176	>sp|P01266|THYG_HUMAN Thyroglobulin OS=Homo sapiens OX=9606 GN=TG PE=1 SV=5	17152	20210911_zy_tissue_ethcd_2.5597.5597.4	controllerType=0 controllerNumber=1 scan=5597	25.3769
04997:3	1	R.HFDVAHVSTAATSN[+1216.423]FSAVR.D	HexNAc(2)Hex(5)	N[+1216]	1078.48	3	3233.42	3233.41	0	1.6	2109	Specific	752.26	645.65	645.65	12.55	176	>sp|P01266|THYG_HUMAN Thyroglobulin OS=Homo sapiens OX=9606 GN=TG PE=1 SV=5	17152	20210911_zy_tissue_ethcd_2.5498.5498.3	controllerType=0 controllerNumber=1 scan=5498	24.9728
04998:3	1	R.HFDVAHVSTAATSN[+1054.370]FSAVR.D	HexNAc(2)Hex(4)	N[+1054]	1024.46	3	3071.36	3071.36	0	-1	2109	Specific	754.72	669.84	669.84	13.34	176	>sp|P01266|THYG_HUMAN Thyroglobulin OS=Homo sapiens OX=9606 GN=TG PE=1 SV=5	17152	20210911_zy_tissue_ethcd_2.5499.5499.3	controllerType=0 controllerNumber=1 scan=5499	24.9774
05027:3	1	R.HFDVAHVSTAATSN[+1054.370]FSAVR.D	HexNAc(2)Hex(4)	N[+1054]	1024.45	3	3071.35	3071.36	0	-3.5	2109	Specific	777.62	694.55	694.55	13.21	176	>sp|P01266|THYG_HUMAN Thyroglobulin OS=Homo sapiens OX=9606 GN=TG PE=1 SV=5	17152	20210911_zy_tissue_ethcd_2.5531.5531.3	controllerType=0 controllerNumber=1 scan=5531	25.1114
05147:3	1	R.HFDVAHVSTAATSN[+730.264]FSAVR.D	HexNAc(2)Hex(2)	N[+730]	916.421	3	2747.25	2747.25	0	-1.3	2109	Specific	783.87	674.39	674.39	13.34	176	>sp|P01266|THYG_HUMAN Thyroglobulin OS=Homo sapiens OX=9606 GN=TG PE=1 SV=5	17152	20210911_zy_tissue_ethcd_2.5664.5664.3	controllerType=0 controllerNumber=1 scan=5664	25.6506
04999:4	1	R.HFDVAHVSTAATSN[+2026.687]FSAVR.D	HexNAc(2)Hex(10)	N[+2027]	1011.92	4	4044.67	4043.68	1	-2.5	2109	Specific	792.91	687.54	687.54	13.27	176	>sp|P01266|THYG_HUMAN Thyroglobulin OS=Homo sapiens OX=9606 GN=TG PE=1 SV=5	17152	20210911_zy_tissue_ethcd_2.5500.5500.4	controllerType=0 controllerNumber=1 scan=5500	24.982
05224:3	1	R.HFDVAHVSTAATSN[+730.264]FSAVR.D	HexNAc(2)Hex(2)	N[+730]	916.422	3	2747.25	2747.25	0	-1.1	2109	Specific	795.16	671.26	671.26	13.34	176	>sp|P01266|THYG_HUMAN Thyroglobulin OS=Homo sapiens OX=9606 GN=TG PE=1 SV=5	17152	20210911_zy_tissue_ethcd_2.5748.5748.3	controllerType=0 controllerNumber=1 scan=5748	26.0071
04931:3	1	R.HFDVAHVSTAATSN[+2026.687]FSAVR.D	HexNAc(2)Hex(10)	N[+2027]	1348.56	3	4043.67	4043.68	0	-1.1	2109	Specific	802.85	685.84	685.84	14.34	176	>sp|P01266|THYG_HUMAN Thyroglobulin OS=Homo sapiens OX=9606 GN=TG PE=1 SV=5	17152	20210911_zy_tissue_ethcd_2.5423.5423.3	controllerType=0 controllerNumber=1 scan=5423	24.6692
05300:3	1	R.HFDVAHVSTAATSN[+730.264]FSAVR.D	HexNAc(2)Hex(2)	N[+730]	916.421	3	2747.25	2747.25	0	-1.5	2109	Specific	807.11	719.74	719.74	14.6	176	>sp|P01266|THYG_HUMAN Thyroglobulin OS=Homo sapiens OX=9606 GN=TG PE=1 SV=5	17152	20210911_zy_tissue_ethcd_2.5831.5831.3	controllerType=0 controllerNumber=1 scan=5831	26.3646
05024:4	1	R.HFDVAHVSTAATSN[+1378.476]FSAVR.D	HexNAc(2)Hex(6)	N[+1378]	849.62	4	3395.46	3395.46	0	-1.7	2109	Specific	809.03	669.7	669.7	14.32	176	>sp|P01266|THYG_HUMAN Thyroglobulin OS=Homo sapiens OX=9606 GN=TG PE=1 SV=5	17152	20210911_zy_tissue_ethcd_2.5528.5528.2	controllerType=0 controllerNumber=1 scan=5528	25.0986
05282:4	1	R.HFDVAHVSTAATSN[+1864.634]FSAVR.D	HexNAc(2)Hex(9)	N[+1865]	971.159	4	3881.62	3881.62	0	-1.7	2109	Specific	821.84	694.76	694.76	14.32	176	>sp|P01266|THYG_HUMAN Thyroglobulin OS=Homo sapiens OX=9606 GN=TG PE=1 SV=5	17152	20210911_zy_tissue_ethcd_2.5811.5811.3	controllerType=0 controllerNumber=1 scan=5811	26.2798
05079:3	1	R.HFDVAHVSTAATSN[+730.264]FSAVR.D	HexNAc(2)Hex(2)	N[+730]	916.421	3	2747.25	2747.25	0	-1.4	2109	Specific	824.62	719.02	719.02	14.6	176	>sp|P01266|THYG_HUMAN Thyroglobulin OS=Homo sapiens OX=9606 GN=TG PE=1 SV=5	17152	20210911_zy_tissue_ethcd_2.5589.5589.3	controllerType=0 controllerNumber=1 scan=5589	25.344
05256:4	1	R.HFDVAHVSTAATSN[+1864.634]FSAVR.D	HexNAc(2)Hex(9)	N[+1865]	971.159	4	3881.62	3881.62	0	-1.7	2109	Specific	826.65	704.79	704.79	14.32	176	>sp|P01266|THYG_HUMAN Thyroglobulin OS=Homo sapiens OX=9606 GN=TG PE=1 SV=5	17152	20210911_zy_tissue_ethcd_2.5783.5783.3	controllerType=0 controllerNumber=1 scan=5783	26.1586
05202:3	1	R.HFDVAHVSTAATSN[+568.212]FSAVR.D	HexNAc(2)Hex(1)	N[+568]	862.404	3	2585.2	2585.2	0	-1	2109	Specific	843.35	759.55	759.55	14.34	176	>sp|P01266|THYG_HUMAN Thyroglobulin OS=Homo sapiens OX=9606 GN=TG PE=1 SV=5	17152	20210911_zy_tissue_ethcd_2.5724.5724.3	controllerType=0 controllerNumber=1 scan=5724	25.9054
04615:4	1	R.HFDVAHVSTAATSN[+1216.423]FSAVR.D	HexNAc(2)Hex(5)	N[+1216]	809.107	4	3233.41	3233.41	0	-1.4	2109	Specific	851.09	734.4	734.4	15.32	176	>sp|P01266|THYG_HUMAN Thyroglobulin OS=Homo sapiens OX=9606 GN=TG PE=1 SV=5	17152	20210911_zy_tissue_ethcd_2.5077.5077.4	controllerType=0 controllerNumber=1 scan=5077	23.131
04977:4	1	R.HFDVAHVSTAATSN[+1378.476]FSAVR.D	HexNAc(2)Hex(6)	N[+1378]	849.621	4	3395.46	3395.46	0	-0.1	2109	Specific	863.95	717.82	717.82	14.95	176	>sp|P01266|THYG_HUMAN Thyroglobulin OS=Homo sapiens OX=9606 GN=TG PE=1 SV=5	17152	20210911_zy_tissue_ethcd_2.5476.5476.2	controllerType=0 controllerNumber=1 scan=5476	24.8834
05191:4	1	R.HFDVAHVSTAATSN[+1864.634]FSAVR.D	HexNAc(2)Hex(9)	N[+1865]	971.159	4	3881.62	3881.62	0	-1.9	2109	Specific	869.83	754.87	754.87	15.32	176	>sp|P01266|THYG_HUMAN Thyroglobulin OS=Homo sapiens OX=9606 GN=TG PE=1 SV=5	17152	20210911_zy_tissue_ethcd_2.5712.5712.3	controllerType=0 controllerNumber=1 scan=5712	25.8549
04961:3	1	R.HFDVAHVSTAATSN[+1864.634]FSAVR.D	HexNAc(2)Hex(9)	N[+1865]	1294.54	3	3881.62	3881.62	0	-1.2	2109	Specific	877.05	747.97	747.97	15.34	176	>sp|P01266|THYG_HUMAN Thyroglobulin OS=Homo sapiens OX=9606 GN=TG PE=1 SV=5	17152	20210911_zy_tissue_ethcd_2.5456.5456.2	controllerType=0 controllerNumber=1 scan=5456	24.8041
05016:3	1	R.HFDVAHVSTAATSN[+568.212]FSAVR.D	HexNAc(2)Hex(1)	N[+568]	862.402	3	2585.19	2585.2	0	-3.3	2109	Specific	880.44	801.31	801.31	15.29	176	>sp|P01266|THYG_HUMAN Thyroglobulin OS=Homo sapiens OX=9606 GN=TG PE=1 SV=5	17152	20210911_zy_tissue_ethcd_2.5519.5519.3	controllerType=0 controllerNumber=1 scan=5519	25.0581
05069:3	1	R.HFDVAHVSTAATSN[+568.212]FSAVR.D	HexNAc(2)Hex(1)	N[+568]	862.405	3	2585.2	2585.2	0	-0.4	2109	Specific	897.07	792.89	792.89	15.23	176	>sp|P01266|THYG_HUMAN Thyroglobulin OS=Homo sapiens OX=9606 GN=TG PE=1 SV=5	17152	20210911_zy_tissue_ethcd_2.5578.5578.3	controllerType=0 controllerNumber=1 scan=5578	25.2959
04960:4	1	R.HFDVAHVSTAATSN[+1540.529]FSAVR.D	HexNAc(2)Hex(7)	N[+1541]	890.137	4	3557.53	3557.52	0	2.5	2109	Specific	898.96	783.57	783.57	14.11	176	>sp|P01266|THYG_HUMAN Thyroglobulin OS=Homo sapiens OX=9606 GN=TG PE=1 SV=5	17152	20210911_zy_tissue_ethcd_2.5455.5455.2	controllerType=0 controllerNumber=1 scan=5455	24.7992
05323:4	1	R.HFDVAHVSTAATSN[+1216.423]FSAVR.D	HexNAc(2)Hex(5)	N[+1216]	809.106	4	3233.4	3233.41	0	-2.3	2109	Specific	918.42	825	825	16.27	176	>sp|P01266|THYG_HUMAN Thyroglobulin OS=Homo sapiens OX=9606 GN=TG PE=1 SV=5	17152	20210911_zy_tissue_ethcd_2.5856.5856.3	controllerType=0 controllerNumber=1 scan=5856	26.4746
05112:4	1	R.HFDVAHVSTAATSN[+1864.634]FSAVR.D	HexNAc(2)Hex(9)	N[+1865]	971.159	4	3881.61	3881.62	0	-2.7	2109	Specific	928.27	802.83	802.83	16.01	176	>sp|P01266|THYG_HUMAN Thyroglobulin OS=Homo sapiens OX=9606 GN=TG PE=1 SV=5	17152	20210911_zy_tissue_ethcd_2.5626.5626.3	controllerType=0 controllerNumber=1 scan=5626	25.4994
05093:4	1	R.HFDVAHVSTAATSN[+1864.634]FSAVR.D	HexNAc(2)Hex(9)	N[+1865]	971.159	4	3881.62	3881.62	0	-1.9	2109	Specific	932.01	816.99	816.99	16.32	176	>sp|P01266|THYG_HUMAN Thyroglobulin OS=Homo sapiens OX=9606 GN=TG PE=1 SV=5	17152	20210911_zy_tissue_ethcd_2.5605.5605.3	controllerType=0 controllerNumber=1 scan=5605	25.4086
05115:4	1	R.HFDVAHVSTAATSN[+1216.423]FSAVR.D	HexNAc(2)Hex(5)	N[+1216]	809.106	4	3233.4	3233.41	0	-2.3	2109	Specific	952.01	855.04	855.04	17.27	176	>sp|P01266|THYG_HUMAN Thyroglobulin OS=Homo sapiens OX=9606 GN=TG PE=1 SV=5	17152	20210911_zy_tissue_ethcd_2.5629.5629.3	controllerType=0 controllerNumber=1 scan=5629	25.5115
04919:4	1	R.HFDVAHVSTAATSN[+1216.423]FSAVR.D	HexNAc(2)Hex(5)	N[+1216]	809.108	4	3233.41	3233.41	0	-0.2	2109	Specific	973.31	829.27	829.27	16.95	176	>sp|P01266|THYG_HUMAN Thyroglobulin OS=Homo sapiens OX=9606 GN=TG PE=1 SV=5	17152	20210911_zy_tissue_ethcd_2.5410.5410.4	controllerType=0 controllerNumber=1 scan=5410	24.6122
05018:4	1	R.HFDVAHVSTAATSN[+1216.423]FSAVR.D	HexNAc(2)Hex(5)	N[+1216]	809.107	4	3233.4	3233.41	0	-2.1	2109	Specific	979.16	836.14	836.14	17.27	176	>sp|P01266|THYG_HUMAN Thyroglobulin OS=Homo sapiens OX=9606 GN=TG PE=1 SV=5	17152	20210911_zy_tissue_ethcd_2.5521.5521.2	controllerType=0 controllerNumber=1 scan=5521	25.0673
05151:4	1	R.HFDVAHVSTAATSN[+1216.423]FSAVR.D	HexNAc(2)Hex(5)	N[+1216]	809.106	4	3233.4	3233.41	0	-2.9	2109	Specific	979.98	902.08	902.08	17.01	176	>sp|P01266|THYG_HUMAN Thyroglobulin OS=Homo sapiens OX=9606 GN=TG PE=1 SV=5	17152	20210911_zy_tissue_ethcd_2.5668.5668.3	controllerType=0 controllerNumber=1 scan=5668	25.669
05213:4	1	R.HFDVAHVSTAATSN[+1216.423]FSAVR.D	HexNAc(2)Hex(5)	N[+1216]	809.107	4	3233.41	3233.41	0	-1	2109	Specific	985.21	870.29	870.29	17.06	176	>sp|P01266|THYG_HUMAN Thyroglobulin OS=Homo sapiens OX=9606 GN=TG PE=1 SV=5	17152	20210911_zy_tissue_ethcd_2.5736.5736.3	controllerType=0 controllerNumber=1 scan=5736	25.9564
05104:4	1	R.HFDVAHVSTAATSN[+1216.423]FSAVR.D	HexNAc(2)Hex(5)	N[+1216]	809.107	4	3233.41	3233.41	0	-1.2	2109	Specific	997.06	915.52	915.52	17.06	176	>sp|P01266|THYG_HUMAN Thyroglobulin OS=Homo sapiens OX=9606 GN=TG PE=1 SV=5	17152	20210911_zy_tissue_ethcd_2.5617.5617.3	controllerType=0 controllerNumber=1 scan=5617	25.4591
04464:4	1	R.HFDVAHVSTAATSN[+1216.423]FSAVR.D	HexNAc(2)Hex(5)	N[+1216]	809.109	4	3233.41	3233.41	0	0.5	2109	Specific	1006.14	813.11	813.11	17.42	176	>sp|P01266|THYG_HUMAN Thyroglobulin OS=Homo sapiens OX=9606 GN=TG PE=1 SV=5	17152	20210911_zy_tissue_ethcd_2.4912.4912.4	controllerType=0 controllerNumber=1 scan=4912	22.3945
05233:4	1	R.HFDVAHVSTAATSN[+1216.423]FSAVR.D	HexNAc(2)Hex(5)	N[+1216]	809.107	4	3233.41	3233.41	0	-1	2109	Specific	1014.02	896.37	896.37	18.06	176	>sp|P01266|THYG_HUMAN Thyroglobulin OS=Homo sapiens OX=9606 GN=TG PE=1 SV=5	17152	20210911_zy_tissue_ethcd_2.5758.5758.3	controllerType=0 controllerNumber=1 scan=5758	26.0496
05143:4	1	R.HFDVAHVSTAATSN[+1216.423]FSAVR.D	HexNAc(2)Hex(5)	N[+1216]	809.107	4	3233.41	3233.41	0	-1.3	2109	Specific	1014.69	905.34	905.34	18.06	176	>sp|P01266|THYG_HUMAN Thyroglobulin OS=Homo sapiens OX=9606 GN=TG PE=1 SV=5	17152	20210911_zy_tissue_ethcd_2.5659.5659.3	controllerType=0 controllerNumber=1 scan=5659	25.6301
05122:4	1	R.HFDVAHVSTAATSN[+1702.581]FSAVR.D	HexNAc(2)Hex(8)	N[+1703]	930.646	4	3719.56	3719.57	0	-1.8	2109	Specific	1017.53	850.72	850.72	18.32	176	>sp|P01266|THYG_HUMAN Thyroglobulin OS=Homo sapiens OX=9606 GN=TG PE=1 SV=5	17152	20210911_zy_tissue_ethcd_2.5637.5637.4	controllerType=0 controllerNumber=1 scan=5637	25.5413
05060:4	1	R.HFDVAHVSTAATSN[+1216.423]FSAVR.D	HexNAc(2)Hex(5)	N[+1216]	809.11	4	3233.42	3233.41	0	1.5	2109	Specific	1019.88	930.38	930.38	17.28	176	>sp|P01266|THYG_HUMAN Thyroglobulin OS=Homo sapiens OX=9606 GN=TG PE=1 SV=5	17152	20210911_zy_tissue_ethcd_2.5568.5568.3	controllerType=0 controllerNumber=1 scan=5568	25.2509
04932:4	1	R.HFDVAHVSTAATSN[+1702.581]FSAVR.D	HexNAc(2)Hex(8)	N[+1703]	930.645	4	3719.56	3719.57	0	-3.2	2109	Specific	1021.4	862.93	862.93	18.01	176	>sp|P01266|THYG_HUMAN Thyroglobulin OS=Homo sapiens OX=9606 GN=TG PE=1 SV=5	17152	20210911_zy_tissue_ethcd_2.5424.5424.2	controllerType=0 controllerNumber=1 scan=5424	24.6738
04530:4	1	R.HFDVAHVSTAATSN[+1864.634]FSAVR.D	HexNAc(2)Hex(9)	N[+1865]	971.159	4	3881.61	3881.62	0	-2.5	2109	Specific	1029.16	870.81	870.81	18.27	176	>sp|P01266|THYG_HUMAN Thyroglobulin OS=Homo sapiens OX=9606 GN=TG PE=1 SV=5	17152	20210911_zy_tissue_ethcd_2.4984.4984.4	controllerType=0 controllerNumber=1 scan=4984	22.7163
05199:4	1	R.HFDVAHVSTAATSN[+1540.529]FSAVR.D	HexNAc(2)Hex(7)	N[+1541]	890.133	4	3557.51	3557.52	0	-2	2109	Specific	1047.65	914.07	914.07	18.27	176	>sp|P01266|THYG_HUMAN Thyroglobulin OS=Homo sapiens OX=9606 GN=TG PE=1 SV=5	17152	20210911_zy_tissue_ethcd_2.5721.5721.4	controllerType=0 controllerNumber=1 scan=5721	25.8936
05011:4	1	R.HFDVAHVSTAATSN[+1864.634]FSAVR.D	HexNAc(2)Hex(9)	N[+1865]	971.159	4	3881.62	3881.62	0	-1.9	2109	Specific	1052.59	924.09	924.09	19.32	176	>sp|P01266|THYG_HUMAN Thyroglobulin OS=Homo sapiens OX=9606 GN=TG PE=1 SV=5	17152	20210911_zy_tissue_ethcd_2.5513.5513.3	controllerType=0 controllerNumber=1 scan=5513	25.0367
12915:3	1	R.RFQAPEPLN[+1768.640]WTGSWDASK.P	HexNAc(4)Hex(5)Fuc(1)	N[+1769]	1286.89	3	3858.64	3858.65	0	-1.6	2242	Specific	202.08	136.06	136.06	4.73	176	>sp|P01266|THYG_HUMAN Thyroglobulin OS=Homo sapiens OX=9606 GN=TG PE=1 SV=5	17152	20210911_zy_tissue_ethcd_2.14189.14189.3	controllerType=0 controllerNumber=1 scan=14189	64.1089
11035:3	1	R.RFQAPEPLN[+2075.730]WTGSWDASK.P	HexNAc(4)Hex(6)NeuAc(1)	N[+2076]	1389.25	3	4165.73	4165.74	0	-1	2242	Specific	207.01	85.69	85.69	4.42	176	>sp|P01266|THYG_HUMAN Thyroglobulin OS=Homo sapiens OX=9606 GN=TG PE=1 SV=5	17152	20210911_zy_tissue_ethcd_2.12126.12126.3	controllerType=0 controllerNumber=1 scan=12126	54.8454
11349:3	1	R.RFQAPEPLN[+2075.730]WTGSWDASK.P	HexNAc(4)Hex(6)NeuAc(1)	N[+2076]	1389.25	3	4165.75	4165.74	0	1.5	2242	Specific	212.85	69.14	69.14	3.95	176	>sp|P01266|THYG_HUMAN Thyroglobulin OS=Homo sapiens OX=9606 GN=TG PE=1 SV=5	17152	20210911_zy_tissue_ethcd_2.12470.12470.3	controllerType=0 controllerNumber=1 scan=12470	56.3979
11108:3	1	R.RFQAPEPLN[+2075.730]WTGSWDASK.P	HexNAc(4)Hex(6)NeuAc(1)	N[+2076]	1389.25	3	4165.73	4165.74	0	-2	2242	Specific	215.14	87.15	87.15	4.59	176	>sp|P01266|THYG_HUMAN Thyroglobulin OS=Homo sapiens OX=9606 GN=TG PE=1 SV=5	17152	20210911_zy_tissue_ethcd_2.12206.12206.3	controllerType=0 controllerNumber=1 scan=12206	55.2051
12606:3	1	R.RFQAPEPLN[+2424.867]WTGSWDASK.P	HexNAc(5)Hex(6)Fuc(1)NeuAc(1)	N[+2425]	1505.63	3	4514.87	4514.88	0	-0.7	2242	Specific	221.78	160.42	160.42	4.47	176	>sp|P01266|THYG_HUMAN Thyroglobulin OS=Homo sapiens OX=9606 GN=TG PE=1 SV=5	17152	20210911_zy_tissue_ethcd_2.13849.13849.3	controllerType=0 controllerNumber=1 scan=13849	62.5947
11591:3	1	R.RFQAPEPLN[+2075.730]WTGSWDASK.P	HexNAc(4)Hex(6)NeuAc(1)	N[+2076]	1388.91	3	4164.73	4165.74	-1	-2.3	2242	Specific	222.25	78.5	78.5	6.29	176	>sp|P01266|THYG_HUMAN Thyroglobulin OS=Homo sapiens OX=9606 GN=TG PE=1 SV=5	17152	20210911_zy_tissue_ethcd_2.12735.12735.3	controllerType=0 controllerNumber=1 scan=12735	57.5735
10015:3	1	R.RFQAPEPLN[+2075.730]WTGSWDASK.P	HexNAc(4)Hex(6)NeuAc(1)	N[+2076]	1388.91	3	4164.71	4165.74	-1	-5.5	2242	Specific	225.41	44.91	44.91	5.69	176	>sp|P01266|THYG_HUMAN Thyroglobulin OS=Homo sapiens OX=9606 GN=TG PE=1 SV=5	17152	20210911_zy_tissue_ethcd_2.11007.11007.3	controllerType=0 controllerNumber=1 scan=11007	49.7953
11273:3	1	R.RFQAPEPLN[+2075.730]WTGSWDASK.P	HexNAc(4)Hex(6)NeuAc(1)	N[+2076]	1389.25	3	4165.73	4165.74	0	-1.1	2242	Specific	226.44	69.78	69.78	5.91	176	>sp|P01266|THYG_HUMAN Thyroglobulin OS=Homo sapiens OX=9606 GN=TG PE=1 SV=5	17152	20210911_zy_tissue_ethcd_2.12387.12387.3	controllerType=0 controllerNumber=1 scan=12387	56.0292
10922:3	1	R.RFQAPEPLN[+2059.735]WTGSWDASK.P	HexNAc(4)Hex(5)Fuc(1)NeuAc(1)	N[+2060]	1383.58	3	4148.73	4149.74	-1	-1.9	2242	Specific	230.06	101.86	101.86	6.48	176	>sp|P01266|THYG_HUMAN Thyroglobulin OS=Homo sapiens OX=9606 GN=TG PE=1 SV=5	17152	20210911_zy_tissue_ethcd_2.12002.12002.3	controllerType=0 controllerNumber=1 scan=12002	54.2858
10963:3	1	R.RFQAPEPLN[+2059.735]WTGSWDASK.P	HexNAc(4)Hex(5)Fuc(1)NeuAc(1)	N[+2060]	1383.92	3	4149.73	4149.74	0	-2.8	2242	Specific	237.06	109.03	109.03	5.99	176	>sp|P01266|THYG_HUMAN Thyroglobulin OS=Homo sapiens OX=9606 GN=TG PE=1 SV=5	17152	20210911_zy_tissue_ethcd_2.12047.12047.3	controllerType=0 controllerNumber=1 scan=12047	54.4902
11652:3	1	R.RFQAPEPLN[+2075.730]WTGSWDASK.P	HexNAc(4)Hex(6)NeuAc(1)	N[+2076]	1389.25	3	4165.73	4165.74	0	-1.2	2242	Specific	238.59	71.09	71.09	5.91	176	>sp|P01266|THYG_HUMAN Thyroglobulin OS=Homo sapiens OX=9606 GN=TG PE=1 SV=5	17152	20210911_zy_tissue_ethcd_2.12802.12802.3	controllerType=0 controllerNumber=1 scan=12802	57.8726
12999:3	1	R.RFQAPEPLN[+2059.735]WTGSWDASK.P	HexNAc(4)Hex(5)Fuc(1)NeuAc(1)	N[+2060]	1383.58	3	4148.73	4149.74	-1	-2	2242	Specific	244.45	113.02	113.02	6.57	176	>sp|P01266|THYG_HUMAN Thyroglobulin OS=Homo sapiens OX=9606 GN=TG PE=1 SV=5	17152	20210911_zy_tissue_ethcd_2.14281.14281.3	controllerType=0 controllerNumber=1 scan=14281	64.5203
13783:4	1	R.RFQAPEPLN[+2350.830]WTGSWDASK.P	HexNAc(4)Hex(5)Fuc(1)NeuAc(2)	N[+2351]	1110.96	4	4440.83	4440.84	0	-1.5	2242	Specific	248.01	162.24	162.24	6.17	176	>sp|P01266|THYG_HUMAN Thyroglobulin OS=Homo sapiens OX=9606 GN=TG PE=1 SV=5	17152	20210911_zy_tissue_ethcd_2.15139.15139.4	controllerType=0 controllerNumber=1 scan=15139	68.3337
12796:3	1	R.RFQAPEPLN[+1897.682]WTGSWDASK.P	HexNAc(4)Hex(4)Fuc(1)NeuAc(1)	N[+1898]	1329.9	3	3987.68	3987.69	0	-3	2242	Specific	258	118.92	118.92	6.13	176	>sp|P01266|THYG_HUMAN Thyroglobulin OS=Homo sapiens OX=9606 GN=TG PE=1 SV=5	17152	20210911_zy_tissue_ethcd_2.14059.14059.3	controllerType=0 controllerNumber=1 scan=14059	63.5252
10516:3	1	R.RFQAPEPLN[+1913.677]WTGSWDASK.P	HexNAc(4)Hex(5)NeuAc(1)	N[+1914]	1335.24	3	4003.7	4003.69	0	2.4	2242	Specific	259.4	155.72	155.72	5.09	176	>sp|P01266|THYG_HUMAN Thyroglobulin OS=Homo sapiens OX=9606 GN=TG PE=1 SV=5	17152	20210911_zy_tissue_ethcd_2.11556.11556.3	controllerType=0 controllerNumber=1 scan=11556	52.2725
10491:3	1	R.RFQAPEPLN[+1768.640]WTGSWDASK.P	HexNAc(4)Hex(5)Fuc(1)	N[+1769]	1286.89	3	3858.64	3858.65	0	-1.7	2242	Specific	269.39	184.36	184.36	6.31	176	>sp|P01266|THYG_HUMAN Thyroglobulin OS=Homo sapiens OX=9606 GN=TG PE=1 SV=5	17152	20210911_zy_tissue_ethcd_2.11529.11529.3	controllerType=0 controllerNumber=1 scan=11529	52.1472
09643:3	1	R.RFQAPEPLN[+2075.730]WTGSWDASK.P	HexNAc(4)Hex(6)NeuAc(1)	N[+2076]	1388.91	3	4164.72	4165.74	-1	-4	2242	Specific	279.51	91.43	91.43	6.01	176	>sp|P01266|THYG_HUMAN Thyroglobulin OS=Homo sapiens OX=9606 GN=TG PE=1 SV=5	17152	20210911_zy_tissue_ethcd_2.10599.10599.3	controllerType=0 controllerNumber=1 scan=10599	47.9483
10498:3	1	R.RFQAPEPLN[+1768.640]WTGSWDASK.P	HexNAc(4)Hex(5)Fuc(1)	N[+1769]	1286.89	3	3858.64	3858.65	0	-2	2242	Specific	348.88	272.08	272.08	6.49	176	>sp|P01266|THYG_HUMAN Thyroglobulin OS=Homo sapiens OX=9606 GN=TG PE=1 SV=5	17152	20210911_zy_tissue_ethcd_2.11537.11537.3	controllerType=0 controllerNumber=1 scan=11537	52.1838
12837:3	1	R.RFQAPEPLN[+2059.735]WTGSWDASK.P	HexNAc(4)Hex(5)Fuc(1)NeuAc(1)	N[+2060]	1383.92	3	4149.74	4149.74	0	-0.9	2242	Specific	350.67	221.31	221.31	6.24	176	>sp|P01266|THYG_HUMAN Thyroglobulin OS=Homo sapiens OX=9606 GN=TG PE=1 SV=5	17152	20210911_zy_tissue_ethcd_2.14104.14104.3	controllerType=0 controllerNumber=1 scan=14104	63.729
13710:3	1	R.RFQAPEPLN[+2350.830]WTGSWDASK.P	HexNAc(4)Hex(5)Fuc(1)NeuAc(2)	N[+2351]	1480.61	3	4439.82	4440.84	-1	-3.1	2242	Specific	358.88	268.64	34.38	6.29	176	>sp|P01266|THYG_HUMAN Thyroglobulin OS=Homo sapiens OX=9606 GN=TG PE=1 SV=5	17152	20210911_zy_tissue_ethcd_2.15059.15059.3	controllerType=0 controllerNumber=1 scan=15059	67.9797
10508:3	1	R.RFQAPEPLN[+1913.677]WTGSWDASK.P	HexNAc(4)Hex(5)NeuAc(1)	N[+1914]	1335.24	3	4003.7	4003.69	0	2.4	2242	Specific	360.8	196.71	196.71	5.1	176	>sp|P01266|THYG_HUMAN Thyroglobulin OS=Homo sapiens OX=9606 GN=TG PE=1 SV=5	17152	20210911_zy_tissue_ethcd_2.11548.11548.3	controllerType=0 controllerNumber=1 scan=11548	52.2327
12649:3	1	R.RFQAPEPLN[+2204.772]WTGSWDASK.P	HexNAc(4)Hex(5)NeuAc(2)	N[+2205]	1432.61	3	4295.8	4294.78	1	3.8	2242	Specific	425.46	328.83	328.83	5.53	176	>sp|P01266|THYG_HUMAN Thyroglobulin OS=Homo sapiens OX=9606 GN=TG PE=1 SV=5	17152	20210911_zy_tissue_ethcd_2.13896.13896.3	controllerType=0 controllerNumber=1 scan=13896	62.8012
10550:3	1	R.RFQAPEPLN[+1971.719]WTGSWDASK.P	HexNAc(5)Hex(5)Fuc(1)	N[+1972]	1354.58	3	4061.72	4061.73	0	-1.1	2242	Specific	428.44	334.57	334.57	6.47	176	>sp|P01266|THYG_HUMAN Thyroglobulin OS=Homo sapiens OX=9606 GN=TG PE=1 SV=5	17152	20210911_zy_tissue_ethcd_2.11594.11594.3	controllerType=0 controllerNumber=1 scan=11594	52.4406
12671:3	1	R.RFQAPEPLN[+2262.814]WTGSWDASK.P	HexNAc(5)Hex(5)Fuc(1)NeuAc(1)	N[+2263]	1451.61	3	4352.82	4352.82	0	-0.3	2242	Specific	433.1	289.77	289.77	6.26	176	>sp|P01266|THYG_HUMAN Thyroglobulin OS=Homo sapiens OX=9606 GN=TG PE=1 SV=5	17152	20210911_zy_tissue_ethcd_2.13920.13920.3	controllerType=0 controllerNumber=1 scan=13920	62.9109
12678:3	1	R.RFQAPEPLN[+2262.814]WTGSWDASK.P	HexNAc(5)Hex(5)Fuc(1)NeuAc(1)	N[+2263]	1451.61	3	4352.83	4352.82	0	0.5	2242	Specific	447.97	296.44	296.44	5.79	176	>sp|P01266|THYG_HUMAN Thyroglobulin OS=Homo sapiens OX=9606 GN=TG PE=1 SV=5	17152	20210911_zy_tissue_ethcd_2.13928.13928.3	controllerType=0 controllerNumber=1 scan=13928	62.9455
10614:3	1	R.RFQAPEPLN[+1768.640]WTGSWDASK.P	HexNAc(4)Hex(5)Fuc(1)	N[+1769]	1286.89	3	3858.65	3858.65	0	-0.1	2242	Specific	465.71	330.47	330.47	6.36	176	>sp|P01266|THYG_HUMAN Thyroglobulin OS=Homo sapiens OX=9606 GN=TG PE=1 SV=5	17152	20210911_zy_tissue_ethcd_2.11664.11664.3	controllerType=0 controllerNumber=1 scan=11664	52.7539
12724:3	1	R.RFQAPEPLN[+2100.761]WTGSWDASK.P	HexNAc(5)Hex(4)Fuc(1)NeuAc(1)	N[+2101]	1397.26	3	4189.76	4190.77	-1	-2.5	2242	Specific	478.75	298.8	298.8	6.8	176	>sp|P01266|THYG_HUMAN Thyroglobulin OS=Homo sapiens OX=9606 GN=TG PE=1 SV=5	17152	20210911_zy_tissue_ethcd_2.13980.13980.3	controllerType=0 controllerNumber=1 scan=13980	63.1736
10539:3	1	R.RFQAPEPLN[+1768.640]WTGSWDASK.P	HexNAc(4)Hex(5)Fuc(1)	N[+1769]	1286.89	3	3858.64	3858.65	0	-1.2	2242	Specific	487.34	385.31	385.31	7.23	176	>sp|P01266|THYG_HUMAN Thyroglobulin OS=Homo sapiens OX=9606 GN=TG PE=1 SV=5	17152	20210911_zy_tissue_ethcd_2.11582.11582.3	controllerType=0 controllerNumber=1 scan=11582	52.389
13732:3	1	R.RFQAPEPLN[+2350.830]WTGSWDASK.P	HexNAc(4)Hex(5)Fuc(1)NeuAc(2)	N[+2351]	1480.95	3	4440.84	4440.84	0	-0.7	2242	Specific	554.21	439.18	439.18	7.76	176	>sp|P01266|THYG_HUMAN Thyroglobulin OS=Homo sapiens OX=9606 GN=TG PE=1 SV=5	17152	20210911_zy_tissue_ethcd_2.15084.15084.3	controllerType=0 controllerNumber=1 scan=15084	68.0886
12754:3	1	R.RFQAPEPLN[+2059.735]WTGSWDASK.P	HexNAc(4)Hex(5)Fuc(1)NeuAc(1)	N[+2060]	1383.92	3	4149.74	4149.74	0	-0.7	2242	Specific	585.97	399.83	399.83	9.06	176	>sp|P01266|THYG_HUMAN Thyroglobulin OS=Homo sapiens OX=9606 GN=TG PE=1 SV=5	17152	20210911_zy_tissue_ethcd_2.14013.14013.3	controllerType=0 controllerNumber=1 scan=14013	63.3231
10551:4	1	R.RFQAPEPLN[+2116.756]WTGSWDASKPR.A	HexNAc(5)Hex(5)NeuAc(1)	N[+2117]	1115.73	4	4459.91	4459.92	0	-2	2242	Specific	278.05	183.51	183.51	5.88	176	>sp|P01266|THYG_HUMAN Thyroglobulin OS=Homo sapiens OX=9606 GN=TG PE=1 SV=5	17152	20210911_zy_tissue_ethcd_2.11595.11595.4	controllerType=0 controllerNumber=1 scan=11595	52.4457
12725:4	1	R.RFQAPEPLN[+2350.830]WTGSWDASKPR.A	HexNAc(4)Hex(5)Fuc(1)NeuAc(2)	N[+2351]	1174	4	4692.97	4693.99	-1	-3.3	2242	Specific	331.19	286.69	60.89	6.28	176	>sp|P01266|THYG_HUMAN Thyroglobulin OS=Homo sapiens OX=9606 GN=TG PE=1 SV=5	17152	20210911_zy_tissue_ethcd_2.13981.13981.4	controllerType=0 controllerNumber=1 scan=13981	63.1785
10668:3	1	R.RFQAPEPLN[+2059.735]WTGSWDASKPR.A	HexNAc(4)Hex(5)Fuc(1)NeuAc(1)	N[+2060]	1468.3	3	4402.9	4402.9	0	-0.2	2242	Specific	439.5	255.26	255.26	6.47	176	>sp|P01266|THYG_HUMAN Thyroglobulin OS=Homo sapiens OX=9606 GN=TG PE=1 SV=5	17152	20210911_zy_tissue_ethcd_2.11723.11723.3	controllerType=0 controllerNumber=1 scan=11723	53.0184
12323:3	1	R.FQAPEPLN[+2075.730]WTGSWDASK.P	HexNAc(4)Hex(6)NeuAc(1)	N[+2076]	1337.22	3	4009.64	4009.64	0	-0.1	2243	Specific	200.33	74.98	74.98	4.2	176	>sp|P01266|THYG_HUMAN Thyroglobulin OS=Homo sapiens OX=9606 GN=TG PE=1 SV=5	17152	20210911_zy_tissue_ethcd_2.13538.13538.3	controllerType=0 controllerNumber=1 scan=13538	61.1902
13340:3	1	R.FQAPEPLN[+2075.730]WTGSWDASK.P	HexNAc(4)Hex(6)NeuAc(1)	N[+2076]	1336.88	3	4008.63	4009.64	-1	0.1	2243	Specific	235.91	86.23	86.23	5.26	176	>sp|P01266|THYG_HUMAN Thyroglobulin OS=Homo sapiens OX=9606 GN=TG PE=1 SV=5	17152	20210911_zy_tissue_ethcd_2.14655.14655.3	controllerType=0 controllerNumber=1 scan=14655	66.1869
13812:3	1	R.FQAPEPLN[+2424.867]WTGSWDASK.P	HexNAc(5)Hex(6)Fuc(1)NeuAc(1)	N[+2425]	1453.26	3	4357.77	4358.77	-1	-0.5	2243	Specific	258.56	146.92	146.92	5.9	176	>sp|P01266|THYG_HUMAN Thyroglobulin OS=Homo sapiens OX=9606 GN=TG PE=1 SV=5	17152	20210911_zy_tissue_ethcd_2.15171.15171.3	controllerType=0 controllerNumber=1 scan=15171	68.4717
13970:3	1	R.FQAPEPLN[+2262.814]WTGSWDASK.P	HexNAc(5)Hex(5)Fuc(1)NeuAc(1)	N[+2263]	1399.58	3	4196.73	4196.72	0	0.7	2243	Specific	259.24	149.89	149.89	5	176	>sp|P01266|THYG_HUMAN Thyroglobulin OS=Homo sapiens OX=9606 GN=TG PE=1 SV=5	17152	20210911_zy_tissue_ethcd_2.15344.15344.3	controllerType=0 controllerNumber=1 scan=15344	69.2296
13448:3	1	R.FQAPEPLN[+2092.745]WTGSWDASK.P	HexNAc(4)Hex(7)Fuc(1)	N[+2093]	1342.55	3	4025.63	4026.65	-1	-5.6	2243	Specific	263.97	106.71	106.71	5.57	176	>sp|P01266|THYG_HUMAN Thyroglobulin OS=Homo sapiens OX=9606 GN=TG PE=1 SV=5	17152	20210911_zy_tissue_ethcd_2.14773.14773.3	controllerType=0 controllerNumber=1 scan=14773	66.7098
13543:3	1	R.FQAPEPLN[+2075.730]WTGSWDASK.P	HexNAc(4)Hex(6)NeuAc(1)	N[+2076]	1337.22	3	4009.63	4009.64	0	-1.3	2243	Specific	280.11	134.58	134.58	6.11	176	>sp|P01266|THYG_HUMAN Thyroglobulin OS=Homo sapiens OX=9606 GN=TG PE=1 SV=5	17152	20210911_zy_tissue_ethcd_2.14877.14877.3	controllerType=0 controllerNumber=1 scan=14877	67.1689
14075:3	1	R.FQAPEPLN[+2262.814]WTGSWDASK.P	HexNAc(5)Hex(5)Fuc(1)NeuAc(1)	N[+2263]	1399.58	3	4196.71	4196.72	0	-2.1	2243	Specific	291.52	165.37	165.37	6.09	176	>sp|P01266|THYG_HUMAN Thyroglobulin OS=Homo sapiens OX=9606 GN=TG PE=1 SV=5	17152	20210911_zy_tissue_ethcd_2.15459.15459.3	controllerType=0 controllerNumber=1 scan=15459	69.7408
14823:3	1	R.FQAPEPLN[+2553.910]WTGSWDASK.P	HexNAc(5)Hex(5)Fuc(1)NeuAc(2)	N[+2554]	1496.61	3	4487.81	4487.82	0	-1.9	2243	Specific	298.02	200.49	200.49	6.19	176	>sp|P01266|THYG_HUMAN Thyroglobulin OS=Homo sapiens OX=9606 GN=TG PE=1 SV=5	17152	20210911_zy_tissue_ethcd_2.16279.16279.3	controllerType=0 controllerNumber=1 scan=16279	73.4048
13941:3	1	R.FQAPEPLN[+2221.788]WTGSWDASK.P	HexNAc(4)Hex(6)Fuc(1)NeuAc(1)	N[+2222]	1385.91	3	4155.7	4155.7	0	1.7	2243	Specific	299.44	160.9	160.9	5.11	176	>sp|P01266|THYG_HUMAN Thyroglobulin OS=Homo sapiens OX=9606 GN=TG PE=1 SV=5	17152	20210911_zy_tissue_ethcd_2.15312.15312.3	controllerType=0 controllerNumber=1 scan=15312	69.088
13920:3	1	R.FQAPEPLN[+2059.735]WTGSWDASK.P	HexNAc(4)Hex(5)Fuc(1)NeuAc(1)	N[+2060]	1331.88	3	3993.62	3993.64	0	-4.9	2243	Specific	305.19	179.34	179.34	5.72	176	>sp|P01266|THYG_HUMAN Thyroglobulin OS=Homo sapiens OX=9606 GN=TG PE=1 SV=5	17152	20210911_zy_tissue_ethcd_2.15289.15289.3	controllerType=0 controllerNumber=1 scan=15289	68.9865
14853:3	1	R.FQAPEPLN[+2350.830]WTGSWDASK.P	HexNAc(4)Hex(5)Fuc(1)NeuAc(2)	N[+2351]	1428.92	3	4284.73	4284.74	0	-1.1	2243	Specific	310.21	170.43	170.43	5.88	176	>sp|P01266|THYG_HUMAN Thyroglobulin OS=Homo sapiens OX=9606 GN=TG PE=1 SV=5	17152	20210911_zy_tissue_ethcd_2.16312.16312.3	controllerType=0 controllerNumber=1 scan=16312	73.552
13617:3	1	R.FQAPEPLN[+2075.730]WTGSWDASK.P	HexNAc(4)Hex(6)NeuAc(1)	N[+2076]	1337.22	3	4009.63	4009.64	0	-1.7	2243	Specific	317.52	179.03	179.03	6.09	176	>sp|P01266|THYG_HUMAN Thyroglobulin OS=Homo sapiens OX=9606 GN=TG PE=1 SV=5	17152	20210911_zy_tissue_ethcd_2.14958.14958.3	controllerType=0 controllerNumber=1 scan=14958	67.5305
13948:3	1	R.FQAPEPLN[+2204.772]WTGSWDASK.P	HexNAc(4)Hex(5)NeuAc(2)	N[+2205]	1380.57	3	4139.7	4138.68	1	3	2243	Specific	318.42	212.44	212.44	4.91	176	>sp|P01266|THYG_HUMAN Thyroglobulin OS=Homo sapiens OX=9606 GN=TG PE=1 SV=5	17152	20210911_zy_tissue_ethcd_2.15320.15320.3	controllerType=0 controllerNumber=1 scan=15320	69.1236
14725:3	1	R.FQAPEPLN[+2350.830]WTGSWDASK.P	HexNAc(4)Hex(5)Fuc(1)NeuAc(2)	N[+2351]	1428.91	3	4284.73	4284.74	0	-1.9	2243	Specific	323.54	187.16	187.16	6.09	176	>sp|P01266|THYG_HUMAN Thyroglobulin OS=Homo sapiens OX=9606 GN=TG PE=1 SV=5	17152	20210911_zy_tissue_ethcd_2.16172.16172.3	controllerType=0 controllerNumber=1 scan=16172	72.9285
12670:3	1	R.FQAPEPLN[+2075.730]WTGSWDASK.P	HexNAc(4)Hex(6)NeuAc(1)	N[+2076]	1336.88	3	4008.62	4009.64	-1	-2.7	2243	Specific	343.96	149.62	149.62	6.05	176	>sp|P01266|THYG_HUMAN Thyroglobulin OS=Homo sapiens OX=9606 GN=TG PE=1 SV=5	17152	20210911_zy_tissue_ethcd_2.13919.13919.3	controllerType=0 controllerNumber=1 scan=13919	62.9061
14039:3	1	R.FQAPEPLN[+2262.814]WTGSWDASK.P	HexNAc(5)Hex(5)Fuc(1)NeuAc(1)	N[+2263]	1399.58	3	4196.72	4196.72	0	-1.3	2243	Specific	371.54	248.49	248.49	6	176	>sp|P01266|THYG_HUMAN Thyroglobulin OS=Homo sapiens OX=9606 GN=TG PE=1 SV=5	17152	20210911_zy_tissue_ethcd_2.15419.15419.3	controllerType=0 controllerNumber=1 scan=15419	69.5642
14762:3	1	R.FQAPEPLN[+2350.830]WTGSWDASK.P	HexNAc(4)Hex(5)Fuc(1)NeuAc(2)	N[+2351]	1428.92	3	4284.73	4284.74	0	-1.2	2243	Specific	380.88	271.43	271.43	6.08	176	>sp|P01266|THYG_HUMAN Thyroglobulin OS=Homo sapiens OX=9606 GN=TG PE=1 SV=5	17152	20210911_zy_tissue_ethcd_2.16212.16212.2	controllerType=0 controllerNumber=1 scan=16212	73.1041
13959:3	1	R.FQAPEPLN[+2075.730]WTGSWDASK.P	HexNAc(4)Hex(6)NeuAc(1)	N[+2076]	1337.56	3	4010.66	4009.64	1	5.5	2243	Specific	409.68	295.16	295.16	5.55	176	>sp|P01266|THYG_HUMAN Thyroglobulin OS=Homo sapiens OX=9606 GN=TG PE=1 SV=5	17152	20210911_zy_tissue_ethcd_2.15332.15332.3	controllerType=0 controllerNumber=1 scan=15332	69.1765
13990:3	1	R.FQAPEPLN[+2059.735]WTGSWDASK.P	HexNAc(4)Hex(5)Fuc(1)NeuAc(1)	N[+2060]	1331.88	3	3993.64	3993.64	0	-0.8	2243	Specific	449.02	297.01	297.01	6.24	176	>sp|P01266|THYG_HUMAN Thyroglobulin OS=Homo sapiens OX=9606 GN=TG PE=1 SV=5	17152	20210911_zy_tissue_ethcd_2.15366.15366.3	controllerType=0 controllerNumber=1 scan=15366	69.3311
14804:3	1	R.FQAPEPLN[+2350.830]WTGSWDASK.P	HexNAc(4)Hex(5)Fuc(1)NeuAc(2)	N[+2351]	1428.92	3	4284.73	4284.74	0	-1.6	2243	Specific	451.24	331.7	331.7	6.54	176	>sp|P01266|THYG_HUMAN Thyroglobulin OS=Homo sapiens OX=9606 GN=TG PE=1 SV=5	17152	20210911_zy_tissue_ethcd_2.16258.16258.3	controllerType=0 controllerNumber=1 scan=16258	73.3114
14767:3	1	R.FQAPEPLN[+2350.830]WTGSWDASK.P	HexNAc(4)Hex(5)Fuc(1)NeuAc(2)	N[+2351]	1428.92	3	4284.73	4284.74	0	-1.2	2243	Specific	497.8	349.67	349.67	6.4	176	>sp|P01266|THYG_HUMAN Thyroglobulin OS=Homo sapiens OX=9606 GN=TG PE=1 SV=5	17152	20210911_zy_tissue_ethcd_2.16218.16218.3	controllerType=0 controllerNumber=1 scan=16218	73.1311
13070:3	1	R.FQAPEPLN[+1971.719]WTGSWDASK.P	HexNAc(5)Hex(5)Fuc(1)	N[+1972]	1302.55	3	3905.62	3905.63	0	-0.8	2243	Specific	513.35	418.94	418.94	7.72	176	>sp|P01266|THYG_HUMAN Thyroglobulin OS=Homo sapiens OX=9606 GN=TG PE=1 SV=5	17152	20210911_zy_tissue_ethcd_2.14359.14359.3	controllerType=0 controllerNumber=1 scan=14359	64.8645
13058:3	1	R.FQAPEPLN[+1768.640]WTGSWDASK.P	HexNAc(4)Hex(5)Fuc(1)	N[+1769]	1234.85	3	3702.54	3702.55	0	-1.3	2243	Specific	522.21	425.18	425.18	7.72	176	>sp|P01266|THYG_HUMAN Thyroglobulin OS=Homo sapiens OX=9606 GN=TG PE=1 SV=5	17152	20210911_zy_tissue_ethcd_2.14346.14346.3	controllerType=0 controllerNumber=1 scan=14346	64.8077
12931:3	1	R.FQAPEPLN[+2116.756]WTGSWDASKPR.A	HexNAc(5)Hex(5)NeuAc(1)	N[+2117]	1435.28	3	4303.81	4303.82	0	-0.8	2243	Specific	217.52	39.87	39.87	2.98	176	>sp|P01266|THYG_HUMAN Thyroglobulin OS=Homo sapiens OX=9606 GN=TG PE=1 SV=5	17152	20210911_zy_tissue_ethcd_2.14207.14207.3	controllerType=0 controllerNumber=1 scan=14207	64.1884
13885:3	1	R.FQAPEPLN[+2350.830]WTGSWDASKPR.A	HexNAc(4)Hex(5)Fuc(1)NeuAc(2)	N[+2351]	1513.3	3	4537.88	4537.89	0	-2.8	2243	Specific	261.13	177.17	38.84	6.04	176	>sp|P01266|THYG_HUMAN Thyroglobulin OS=Homo sapiens OX=9606 GN=TG PE=1 SV=5	17152	20210911_zy_tissue_ethcd_2.15251.15251.3	controllerType=0 controllerNumber=1 scan=15251	68.8168
13860:3	1	R.FQAPEPLN[+2350.830]WTGSWDASKPR.A	HexNAc(4)Hex(5)Fuc(1)NeuAc(2)	N[+2351]	1513.3	3	4537.88	4537.89	0	-2.5	2243	Specific	399.76	289.42	38.98	6.56	176	>sp|P01266|THYG_HUMAN Thyroglobulin OS=Homo sapiens OX=9606 GN=TG PE=1 SV=5	17152	20210911_zy_tissue_ethcd_2.15223.15223.3	controllerType=0 controllerNumber=1 scan=15223	68.7006
01146:2	1	R.ALEN[+1216.423]ATR.D	HexNAc(2)Hex(5)	N[+1216]	995.919	2	1990.83	1990.83	0	-1	2579	Specific	202.6	34.74	34.74	1.6	176	>sp|P01266|THYG_HUMAN Thyroglobulin OS=Homo sapiens OX=9606 GN=TG PE=1 SV=5	17152	20210911_zy_tissue_ethcd_2.1273.1273.2	controllerType=0 controllerNumber=1 scan=1273	5.9959
00852:2	1	R.ALEN[+1054.370]ATR.D	HexNAc(2)Hex(4)	N[+1054]	914.893	2	1828.78	1828.78	0	-1.2	2579	Specific	290.09	78.43	78.43	4.26	176	>sp|P01266|THYG_HUMAN Thyroglobulin OS=Homo sapiens OX=9606 GN=TG PE=1 SV=5	17152	20210911_zy_tissue_ethcd_2.949.949.2	controllerType=0 controllerNumber=1 scan=949	4.4762
00829:2	1	R.ALEN[+1216.423]ATR.D	HexNAc(2)Hex(5)	N[+1216]	995.919	2	1990.83	1990.83	0	-1.6	2579	Specific	329.61	86.62	86.62	4.66	176	>sp|P01266|THYG_HUMAN Thyroglobulin OS=Homo sapiens OX=9606 GN=TG PE=1 SV=5	17152	20210911_zy_tissue_ethcd_2.924.924.2	controllerType=0 controllerNumber=1 scan=924	4.3512
00813:2	1	R.ALEN[+1378.476]ATR.D	HexNAc(2)Hex(6)	N[+1378]	1076.94	2	2152.88	2152.89	0	-2.4	2579	Specific	352.87	96.52	96.52	5.27	176	>sp|P01266|THYG_HUMAN Thyroglobulin OS=Homo sapiens OX=9606 GN=TG PE=1 SV=5	17152	20210911_zy_tissue_ethcd_2.906.906.2	controllerType=0 controllerNumber=1 scan=906	4.2708
00780:2	1	R.ALEN[+1540.529]ATR.D	HexNAc(2)Hex(7)	N[+1541]	1157.97	2	2314.93	2314.94	0	-2.6	2579	Specific	365.85	116.67	116.67	5.3	176	>sp|P01266|THYG_HUMAN Thyroglobulin OS=Homo sapiens OX=9606 GN=TG PE=1 SV=5	17152	20210911_zy_tissue_ethcd_2.869.869.2	controllerType=0 controllerNumber=1 scan=869	4.124
03485:3	2	K.KLHINHNN[+2059.735]LTESVGPLPK.S	HexNAc(4)Hex(5)Fuc(1)NeuAc(1)	N[+2060]	1357.62	3	4070.84	4070.84	0	-1	120	Specific	207.57	83.64	83.64	4.18	42	>sp|P51884|LUM_HUMAN Lumican OS=Homo sapiens OX=9606 GN=LUM PE=1 SV=2	17011	20210911_zy_tissue_ethcd_2.3839.3839.3	controllerType=0 controllerNumber=1 scan=3839	17.5582
02954:4	2	K.KLHINHNN[+1768.640]LTESVGPLPK.S	HexNAc(4)Hex(5)Fuc(1)	N[+1769]	945.691	4	3779.74	3779.75	0	-1.5	120	Specific	230.47	230.47	230.47	6.2	42	>sp|P51884|LUM_HUMAN Lumican OS=Homo sapiens OX=9606 GN=LUM PE=1 SV=2	17011	20210911_zy_tissue_ethcd_2.3256.3256.4	controllerType=0 controllerNumber=1 scan=3256	14.9194
03408:4	2	K.KLHINHNN[+2424.867]LTESVGPLPK.S	HexNAc(5)Hex(6)Fuc(1)NeuAc(1)	N[+2425]	1109.75	4	4435.97	4435.98	0	-0.7	120	Specific	233.72	194.21	194.21	6.2	42	>sp|P51884|LUM_HUMAN Lumican OS=Homo sapiens OX=9606 GN=LUM PE=1 SV=2	17011	20210911_zy_tissue_ethcd_2.3754.3754.4	controllerType=0 controllerNumber=1 scan=3754	17.1746
04518:3	2	K.KLHINHNN[+2350.830]LTESVGPLPK.S	HexNAc(4)Hex(5)Fuc(1)NeuAc(2)	N[+2351]	1454.31	3	4360.92	4361.94	-1	-2.5	120	Specific	269.73	143.84	55.35	6.09	42	>sp|P51884|LUM_HUMAN Lumican OS=Homo sapiens OX=9606 GN=LUM PE=1 SV=2	17011	20210911_zy_tissue_ethcd_2.4971.4971.3	controllerType=0 controllerNumber=1 scan=4971	22.6558
04507:3	2	K.KLHINHNN[+2350.830]LTESVGPLPK.S	HexNAc(4)Hex(5)Fuc(1)NeuAc(2)	N[+2351]	1454.65	3	4361.93	4361.94	0	-3	120	Specific	270.35	159.37	53.23	5.72	42	>sp|P51884|LUM_HUMAN Lumican OS=Homo sapiens OX=9606 GN=LUM PE=1 SV=2	17011	20210911_zy_tissue_ethcd_2.4959.4959.3	controllerType=0 controllerNumber=1 scan=4959	22.6025
03515:4	2	K.KLHINHNN[+2059.735]LTESVGPLPK.S	HexNAc(4)Hex(5)Fuc(1)NeuAc(1)	N[+2060]	1018.46	4	4070.83	4070.84	0	-2.3	120	Specific	497.47	421.52	421.52	8.24	42	>sp|P51884|LUM_HUMAN Lumican OS=Homo sapiens OX=9606 GN=LUM PE=1 SV=2	17011	20210911_zy_tissue_ethcd_2.3872.3872.4	controllerType=0 controllerNumber=1 scan=3872	17.7038
05983:3	2	K.LHINHNN[+3081.095]LTESVGPLPK.S	HexNAc(6)Hex(7)Fuc(1)NeuAc(2)	N[+3081]	1655.04	3	4963.11	4964.11	-1	0.3	121	Specific	201.58	92.59	92.59	4.37	42	>sp|P51884|LUM_HUMAN Lumican OS=Homo sapiens OX=9606 GN=LUM PE=1 SV=2	17011	20210911_zy_tissue_ethcd_2.6581.6581.3	controllerType=0 controllerNumber=1 scan=6581	29.7663
04693:3	2	K.LHINHNN[+2204.772]LTESVGPLPK.S	HexNAc(4)Hex(5)NeuAc(2)	N[+2205]	1363.6	3	4088.79	4087.79	1	0.9	121	Specific	209.32	104.08	104.08	4.11	42	>sp|P51884|LUM_HUMAN Lumican OS=Homo sapiens OX=9606 GN=LUM PE=1 SV=2	17011	20210911_zy_tissue_ethcd_2.5163.5163.3	controllerType=0 controllerNumber=1 scan=5163	23.5172
03744:4	2	K.LHINHNN[+2336.851]LTESVGPLPK.S	HexNAc(6)Hex(6)Fuc(1)	N[+2337]	1055.47	4	4218.86	4219.86	-1	-0.7	121	Specific	213.95	175.47	175.47	4.26	42	>sp|P51884|LUM_HUMAN Lumican OS=Homo sapiens OX=9606 GN=LUM PE=1 SV=2	17011	20210911_zy_tissue_ethcd_2.4123.4123.4	controllerType=0 controllerNumber=1 scan=4123	18.8482
04824:3	2	K.LHINHNN[+2262.814]LTESVGPLPK.S	HexNAc(5)Hex(5)Fuc(1)NeuAc(1)	N[+2263]	1382.61	3	4145.83	4145.83	0	-0.3	121	Specific	221.83	79.19	79.19	4.55	42	>sp|P51884|LUM_HUMAN Lumican OS=Homo sapiens OX=9606 GN=LUM PE=1 SV=2	17011	20210911_zy_tissue_ethcd_2.5306.5306.3	controllerType=0 controllerNumber=1 scan=5306	24.1556
04571:3	2	K.LHINHNN[+2221.788]LTESVGPLPK.S	HexNAc(4)Hex(6)Fuc(1)NeuAc(1)	N[+2222]	1368.94	3	4104.81	4104.8	0	2.4	121	Specific	227.92	97.91	97.91	5.38	42	>sp|P51884|LUM_HUMAN Lumican OS=Homo sapiens OX=9606 GN=LUM PE=1 SV=2	17011	20210911_zy_tissue_ethcd_2.5029.5029.3	controllerType=0 controllerNumber=1 scan=5029	22.916
05884:3	2	K.LHINHNN[+2715.963]LTESVGPLPK.S	HexNAc(5)Hex(6)Fuc(1)NeuAc(2)	N[+2716]	1533.33	3	4597.98	4598.98	-1	1.6	121	Specific	237.66	138.57	138.57	5.69	42	>sp|P51884|LUM_HUMAN Lumican OS=Homo sapiens OX=9606 GN=LUM PE=1 SV=2	17011	20210911_zy_tissue_ethcd_2.6472.6472.3	controllerType=0 controllerNumber=1 scan=6472	29.2689
05850:3	2	K.LHINHNN[+2715.963]LTESVGPLPK.S	HexNAc(5)Hex(6)Fuc(1)NeuAc(2)	N[+2716]	1533.66	3	4598.97	4598.98	0	-1.3	121	Specific	245.37	131.1	131.1	6.72	42	>sp|P51884|LUM_HUMAN Lumican OS=Homo sapiens OX=9606 GN=LUM PE=1 SV=2	17011	20210911_zy_tissue_ethcd_2.6435.6435.3	controllerType=0 controllerNumber=1 scan=6435	29.0982
04831:3	2	K.LHINHNN[+2262.814]LTESVGPLPK.S	HexNAc(5)Hex(5)Fuc(1)NeuAc(1)	N[+2263]	1382.61	3	4145.82	4145.83	0	-1.2	121	Specific	246.59	127.55	127.55	6.46	42	>sp|P51884|LUM_HUMAN Lumican OS=Homo sapiens OX=9606 GN=LUM PE=1 SV=2	17011	20210911_zy_tissue_ethcd_2.5314.5314.3	controllerType=0 controllerNumber=1 scan=5314	24.1892
06158:3	2	K.LHINHNN[+2424.867]LTESVGPLPK.S	HexNAc(5)Hex(6)Fuc(1)NeuAc(1)	N[+2425]	1436.96	3	4308.86	4307.88	1	-5.2	121	Specific	256.43	73.68	73.68	6.08	42	>sp|P51884|LUM_HUMAN Lumican OS=Homo sapiens OX=9606 GN=LUM PE=1 SV=2	17011	20210911_zy_tissue_ethcd_2.6773.6773.3	controllerType=0 controllerNumber=1 scan=6773	30.6485
03704:3	2	K.LHINHNN[+2498.904]LTESVGPLPK.S	HexNAc(6)Hex(7)Fuc(1)	N[+2499]	1461.31	3	4381.91	4381.92	0	-1.5	121	Specific	260.43	164.51	164.51	6.63	42	>sp|P51884|LUM_HUMAN Lumican OS=Homo sapiens OX=9606 GN=LUM PE=1 SV=2	17011	20210911_zy_tissue_ethcd_2.4079.4079.3	controllerType=0 controllerNumber=1 scan=4079	18.6514
04613:3	2	K.LHINHNN[+2262.814]LTESVGPLPK.S	HexNAc(5)Hex(5)Fuc(1)NeuAc(1)	N[+2263]	1382.62	3	4145.83	4145.83	0	1.1	121	Specific	262.23	116.22	116.22	5.6	42	>sp|P51884|LUM_HUMAN Lumican OS=Homo sapiens OX=9606 GN=LUM PE=1 SV=2	17011	20210911_zy_tissue_ethcd_2.5075.5075.3	controllerType=0 controllerNumber=1 scan=5075	23.1222
03748:3	2	K.LHINHNN[+1768.640]LTESVGPLPK.S	HexNAc(4)Hex(5)Fuc(1)	N[+1769]	1217.89	3	3651.65	3651.65	0	-0.2	121	Specific	265.1	163.12	163.12	6.26	42	>sp|P51884|LUM_HUMAN Lumican OS=Homo sapiens OX=9606 GN=LUM PE=1 SV=2	17011	20210911_zy_tissue_ethcd_2.4127.4127.3	controllerType=0 controllerNumber=1 scan=4127	18.8667
04487:3	2	K.LHINHNN[+2569.905]LTESVGPLPK.S	HexNAc(5)Hex(6)NeuAc(2)	N[+2570]	1485.31	3	4453.92	4452.92	1	0.6	121	Specific	267.68	150.63	150.63	5.46	42	>sp|P51884|LUM_HUMAN Lumican OS=Homo sapiens OX=9606 GN=LUM PE=1 SV=2	17011	20210911_zy_tissue_ethcd_2.4937.4937.3	controllerType=0 controllerNumber=1 scan=4937	22.5053
03849:4	2	K.LHINHNN[+2407.852]LTESVGPLPK.S	HexNAc(5)Hex(5)NeuAc(2)	N[+2408]	1073.22	4	4289.86	4290.87	-1	0.5	121	Specific	268.75	244.59	244.59	5.74	42	>sp|P51884|LUM_HUMAN Lumican OS=Homo sapiens OX=9606 GN=LUM PE=1 SV=2	17011	20210911_zy_tissue_ethcd_2.4238.4238.4	controllerType=0 controllerNumber=1 scan=4238	19.3578
05514:3	2	K.LHINHNN[+2424.867]LTESVGPLPK.S	HexNAc(5)Hex(6)Fuc(1)NeuAc(1)	N[+2425]	1436.96	3	4308.86	4307.88	1	-5.6	121	Specific	280.97	130.17	130.17	6.36	42	>sp|P51884|LUM_HUMAN Lumican OS=Homo sapiens OX=9606 GN=LUM PE=1 SV=2	17011	20210911_zy_tissue_ethcd_2.6066.6066.3	controllerType=0 controllerNumber=1 scan=6066	27.4198
04548:3	2	K.LHINHNN[+2278.809]LTESVGPLPK.S	HexNAc(5)Hex(6)NeuAc(1)	N[+2279]	1387.94	3	4161.82	4161.82	0	-1.3	121	Specific	286.54	134.97	134.97	6.32	42	>sp|P51884|LUM_HUMAN Lumican OS=Homo sapiens OX=9606 GN=LUM PE=1 SV=2	17011	20210911_zy_tissue_ethcd_2.5004.5004.3	controllerType=0 controllerNumber=1 scan=5004	22.8031
03831:3	2	K.LHINHNN[+1606.587]LTESVGPLPK.S	HexNAc(4)Hex(4)Fuc(1)	N[+1607]	1163.87	3	3489.59	3489.6	0	-2.6	121	Specific	290.75	180.18	180.18	6.24	42	>sp|P51884|LUM_HUMAN Lumican OS=Homo sapiens OX=9606 GN=LUM PE=1 SV=2	17011	20210911_zy_tissue_ethcd_2.4218.4218.3	controllerType=0 controllerNumber=1 scan=4218	19.2693
03699:3	2	K.LHINHNN[+2133.772]LTESVGPLPK.S	HexNAc(5)Hex(6)Fuc(1)	N[+2134]	1339.6	3	4016.78	4016.79	0	-1.8	121	Specific	302.18	194.63	194.63	6.56	42	>sp|P51884|LUM_HUMAN Lumican OS=Homo sapiens OX=9606 GN=LUM PE=1 SV=2	17011	20210911_zy_tissue_ethcd_2.4074.4074.3	controllerType=0 controllerNumber=1 scan=4074	18.628
04408:3	2	K.LHINHNN[+2789.999]LTESVGPLPK.S	HexNAc(6)Hex(7)Fuc(1)NeuAc(1)	N[+2790]	1558.34	3	4673.01	4673.01	0	-0.8	121	Specific	308.86	202.06	202.06	6.4	42	>sp|P51884|LUM_HUMAN Lumican OS=Homo sapiens OX=9606 GN=LUM PE=1 SV=2	17011	20210911_zy_tissue_ethcd_2.4851.4851.3	controllerType=0 controllerNumber=1 scan=4851	22.1242
[truncated: 310 more rows]

## Sheet: EThcD-R3
Query #:z	Protein Rank	Peptide < ProteinMetrics Confidential >	Glycans NHFAGNa	Modification Type(s)	Observed m/z	z	Observed (M+H)	Calc. mass (M+H)	Off-by-x error	Mass error (ppm)	Starting position	Cleavage	Score	Delta	Delta Mod	|Log Prob|	# of unique peptides	Protein Name	Protein DB number	Comment	Scan #	Scan Time
[truncated: 711 more rows]

[truncated: 12 more sheets: sceHCD-R1, sceHCD-R2, sceHCD-R3, EThcD-sceHCD-R1, EThcD-sceHCD-R2, EThcD-sceHCD-R3, HCD-pd-ETD-R1, HCD-pd-ETD-R2, HCD-pd-ETD-R3, sceHCD-pd-ETD-R1, sceHCD-pd-ETD-R2, sceHCD-pd-ETD-R3]
