# Supplementary material for: Comparative N-Glycoproteomics Analysis of Clinical Samples Via Different Mass Spectrometry Dissociation Methods
Source: Front Chem. 2022 Feb 24;10:839470. doi: 10.3389/fchem.2022.839470 (PMC8907888; doi:10.3389/fchem.2022.839470)
Supplement: Supplementary file 1 [file DataSheet1.ZIP › Table S5-Statistical analysis of the number of localized N-glycopeptide spectral matches (glycoPSMs), N-glycans, and intact N-glycopeptides from human plasma, urine, cells, and tissues.xls]

## Sheet: Plasma
Table S5.1-Statistical analysis of the number of localized N-glycopeptide spectral matches (glycoPSMs), N-glycans, and intact N-glycopeptides from PCa patients' plasma
Samples_Fragmentation modes_Replication	EThcD_R1	EThcD_R2	EThcD_R3	sceHCD_R1	sceHCD_R2	sceHCD_R3	sceHCD-EThcD_R1	sceHCD-EThcD_R2	sceHCD-EThcD_R3	HCD-pd-ETD_R1	HCD-pd-ETD_R2	HCD-pd-ETD_R3	sceHCD-pd-ETD_R1	sceHCD-pd-ETD_R2	sceHCD-pd-ETD_R3	P-Value (ANOVA Test)
PSMs	1660	1665	1518	1509	1455	1520	3119	3059	2930	1846	1720	1628	1411	1421	1497	1.36779e-09
N-glycans	104	99	102	88	81	82	142	132	121	105	101	108	104	108	101	1.94891e-05
Intact N-glycopeptides	490	483	467	626	672	676	815	773	752	343	361	351	365	389	380	7.57329e-10
N-glycoproteins	73	64	68	96	108	102	112	100	100	54	62	66	70	74	70	3.28755e-06

## Sheet: Urine
Table S5.2-Statistical analysis of the number of localized N-glycopeptide spectral matches (glycoPSMs), N-glycans, and intact N-glycopeptides from from IgAN patients' urine
Samples_Fragmentation modes_Replication	EThcD_R1	EThcD_R2	EThcD_R3	sceHCD_R1	sceHCD_R2	sceHCD_R3	sceHCD-EThcD_R1	sceHCD-EThcD_R2	sceHCD-EThcD_R3	HCD-pd-ETD_R1	HCD-pd-ETD_R2	HCD-pd-ETD_R3	sceHCD-pd-ETD_R1	sceHCD-pd-ETD_R2	sceHCD-pd-ETD_R3	P-Value (ANOVA Test)
PSMs	1969	1891	1978	2279	2361	2311	3556	3463	3425	2128	2153	2034	1884	2084	2078	7.21517e-10
N-glycans	90	103	102	115	117	122	121	119	125	98	100	112	105	105	101	0.000975728
Intact N-glycopeptides	548	562	542	891	926	933	877	898	847	419	435	449	451	473	485	3.43753e-11
N-glycoproteins	104	98	107	152	143	152	142	156	132	98	99	101	94	107	101	4.55711e-06

## Sheet: Cells
Table S5.3-Statistical analysis of the number of localized N-glycopeptide spectral matches (glycoPSMs), N-glycans, and intact N-glycopeptides from HepG2 cells
Samples_Fragmentation modes_Replication	EThcD_R1	EThcD_R2	EThcD_R3	sceHCD_R1	sceHCD_R2	sceHCD_R3	sceHCD-EThcD_R1	sceHCD-EThcD_R2	sceHCD-EThcD_R3	HCD-pd-ETD_R1	HCD-pd-ETD_R2	HCD-pd-ETD_R3	sceHCD-pd-ETD_R1	sceHCD-pd-ETD_R2	sceHCD-pd-ETD_R3	P-Value (ANOVA Test)
PSMs	721	776	792	1273	1201	1197	1853	2110	2090	840	812	831	867	806	779	4.75739e-09
N-glycans	31	33	34	54	51	45	53	43	40	32	30	30	35	28	32	0.000372205
Intact N-glycopeptides	233	265	257	767	714	709	673	703	680	234	252	231	306	282	268	3.23624e-11
N-glycoproteins	74	79	81	199	187	192	181	182	188	88	94	83	100	100	101	2.19188e-11

## Sheet: Tissues
Table S5.4-Statistical analysis of the number of localized N-glycopeptide spectral matches (glycoPSMs), N-glycans, and intact N-glycopeptides from TC patients' tissues
Samples_Fragmentation modes_Replication	EThcD_R1	EThcD_R2	EThcD_R3	sceHCD_R1	sceHCD_R2	sceHCD_R3	sceHCD-EThcD_R1	sceHCD-EThcD_R2	sceHCD-EThcD_R3	HCD-pd-ETD_R1	HCD-pd-ETD_R2	HCD-pd-ETD_R3	sceHCD-pd-ETD_R1	sceHCD-pd-ETD_R2	sceHCD-pd-ETD_R3	P-Value (ANOVA Test)
PSMs	1471	1427	1431	1574	1720	1680	2641	2645	2597	1361	1341	1377	1281	1403	1256	1.41292e-10
N-glycans	76	75	68	97	97	92	86	83	87	76	70	79	67	72	68	1.8346e-05
Intact N-glycopeptides	368	357	344	630	660	694	630	587	631	264	270	268	291	291	288	2.8095e-10
N-glycoproteins	71	71	68	118	130	149	122	118	121	80	76	78	94	87	88	3.70312e-06
