# Supplementary material for: Comparative N-Glycoproteomics Analysis of Clinical Samples Via Different Mass Spectrometry Dissociation Methods
Source: Front Chem. 2022 Feb 24;10:839470. doi: 10.3389/fchem.2022.839470 (PMC8907888; doi:10.3389/fchem.2022.839470)
Supplement: Supplementary file 1 [file DataSheet1.ZIP › Table S6-Site-specific N-glycosylation of alpha-1-acid glycoprotein 1 from human plasma.xls]

## Sheet: A1AG1
Table S5. site-specific N-glycosylation of alpha-1-acid glycoprotein 1 from human plasma ("+": identified; "-": unidentified)
Glycosites	Intact N-glycopeptides	Glycans	EThcD-R1	EThcD-R2	EThcD-R3	sceHCD-R1	sceHCD-R2	sceHCD-R3	EThcD-sceHCD-R1	EThcD-sceHCD-R2	EThcD-sceHCD-R3	HCD-pd-ETD-R1	HCD-pd-ETD-R2	HCD-pd-ETD-R3	sceHCD-pd-ETD-R1	sceHCD-pd-ETD-R2	sceHCD-pd-ETD-R3
N56	R.NEEYN[+2204.772]K.SB3:B40A1B3:B37B3:B36B3:B35	HexNAc(4)Hex(5)NeuAc(2)	+	+	+	+	+	+	+	+	+	-	+	-	-	-	+
	R.NEEYN[+2861.000]K.S	HexNAc(5)Hex(6)NeuAc(3)	-	+	+	+	+	+	+	+	+	-	+	+	-	+	-
	R.NEEYN[+1913.677]K.S	HexNAc(4)Hex(5)NeuAc(1)	-	-	-	+	+	+	+	+	+	+	-	+	+	+	-
	R.NEEYN[+2350.830]K.S	HexNAc(4)Hex(5)Fuc(1)NeuAc(2)	+	-	+	+	+	+	+	+	+	-	-	-	-	-	+
	R.NEEYN[+2715.963]K.S	HexNAc(5)Hex(6)Fuc(1)NeuAc(2)	+	+	+	+	+	+	+	+	+	-	-	-	-	-	-
	R.NEEYN[+2569.905]K.S	HexNAc(5)Hex(6)NeuAc(2)	-	+	+	+	+	+	+	+	+	-	-	-	-	-	-
	R.NEEYN[+3007.058]K.S	HexNAc(5)Hex(6)Fuc(1)NeuAc(3)	-	+	+	+	+	+	+	+	+	-	-	-	-	-	-
	R.NEEYN[+1548.545]K.S	HexNAc(3)Hex(4)NeuAc(1)	+	-	-	+	-	+	+	+	+	-	-	-	-	-	-
	R.NEEYN[+2878.015]K.S	HexNAc(5)Hex(7)Fuc(1)NeuAc(2)	-	-	-	-	+	-	+	+	-	-	-	-	-	+	-
	R.NEEYN[+1872.651]K.S	HexNAc(3)Hex(6)NeuAc(1)	-	-	-	+	+	-	+	-	-	-	-	-	-	-	-
	R.NEEYN[+2256.851]K.S	HexNAc(8)Hex(3)Fuc(1)	-	-	-	-	+	+	-	-	+	-	-	-	-	-	-
	R.NEEYN[+3517.228]K.S	HexNAc(6)Hex(7)NeuAc(4)	-	-	-	-	+	-	+	-	-	-	-	-	-	-	-
	R.NEEYN[+2481.889]K.S	HexNAc(6)Hex(6)NeuAc(1)	-	-	+	-	-	-	-	-	-	-	-	-	-	-	-
	R.NEEYN[+2805.994]K.S	HexNAc(6)Hex(8)NeuAc(1)	-	-	-	+	-	-	-	-	-	-	-	-	-	-	-
	R.NEEYN[+3663.286]K.S	HexNAc(6)Hex(7)Fuc(1)NeuAc(4)	-	-	-	-	-	+	-	-	-	-	-	-	-	-	-
N93	R.QDQC[+57.021]IYN[+2861.000]TTYLNVQR.E	HexNAc(5)Hex(6)NeuAc(3)	+	+	+	+	+	+	+	+	+	+	+	+	+	+	+
	R.QDQC[+57.021]IYN[+2935.037]TTYLNVQR.E	HexNAc(6)Hex(7)NeuAc(2)	+	+	+	+	+	+	+	+	+	+	+	+	+	+	+
	R.QDQC[+57.021]IYN[+3081.095]TTYLNVQR.E	HexNAc(6)Hex(7)Fuc(1)NeuAc(2)	+	+	+	+	+	+	+	+	+	+	+	+	+	+	+
	R.QDQC[+57.021]IYN[+3226.132]TTYLNVQR.E	HexNAc(6)Hex(7)NeuAc(3)	+	+	+	+	+	+	+	+	+	+	+	+	+	+	+
	R.QDQC[+57.021]IYN[+3372.190]TTYLNVQR.E	HexNAc(6)Hex(7)Fuc(1)NeuAc(3)	+	+	+	+	+	+	+	+	+	+	+	+	+	+	+
	R.QDQC[+57.021]IYN[+3517.228]TTYLNVQR.E	HexNAc(6)Hex(7)NeuAc(4)	+	+	+	+	+	+	+	+	+	+	+	+	+	+	+
	R.QDQC[+57.021]IYN[+3007.058]TTYLNVQR.E	HexNAc(5)Hex(6)Fuc(1)NeuAc(3)	+	+	+	+	+	+	+	+	+	+	-	+	+	+	+
	R.QDQC[+57.021]IYN[+3663.286]TTYLNVQR.E	HexNAc(6)Hex(7)Fuc(1)NeuAc(4)	-	+	+	+	+	+	+	+	+	+	+	+	+	+	+
	R.QDQC[+57.021]IYN[+2569.905]TTYLNVQR.E	HexNAc(5)Hex(6)NeuAc(2)	+	+	+	+	+	+	+	+	+	-	-	+	+	+	+
	R.QDQC[+57.021]IYN[+4028.418]TTYLNVQR.E	HexNAc(7)Hex(8)Fuc(1)NeuAc(4)	+	+	-	+	+	+	+	+	+	+	-	+	-	+	-
	R.QDQC[+57.021]IYN[+2715.963]TTYLNVQR.E	HexNAc(5)Hex(6)Fuc(1)NeuAc(2)	-	+	+	+	+	+	+	+	+	-	+	-	-	-	-
	R.QDQC[+57.021]IYN[+2204.772]TTYLNVQR.E	HexNAc(4)Hex(5)NeuAc(2)	-	-	-	-	-	+	+	+	+	+	+	+	+	-	-
	R.QDQC[+57.021]IYN[+2643.941]TTYLNVQR.E	HexNAc(6)Hex(7)NeuAc(1)	+	+	+	-	+	-	+	+	+	-	-	-	-	+	-
	R.QDQC[+57.021]IYN[+2878.015]TTYLNVQR.E	HexNAc(5)Hex(7)Fuc(1)NeuAc(2)	+	-	-	+	+	-	-	-	-	-	-	-	+	-	-
	R.QDQC[+57.021]IYN[+3737.322]TTYLNVQR.E	HexNAc(7)Hex(8)Fuc(1)NeuAc(3)	-	-	-	-	-	-	+	-	-	+	-	-	+	-	+
	R.QDQC[+57.021]IYN[+2952.052]TTYLNVQR.E	HexNAc(6)Hex(8)Fuc(1)NeuAc(1)	-	-	-	+	-	+	+	-	-	-	-	-	-	-	-
	R.QDQC[+57.021]IYN[+2789.999]TTYLNVQR.E	HexNAc(6)Hex(7)Fuc(1)NeuAc(1)	-	-	-	-	+	+	-	-	-	-	-	-	-	-	-
	R.QDQC[+57.021]IYN[+3210.137]TTYLNVQR.E	HexNAc(6)Hex(6)Fuc(1)NeuAc(3)	-	-	-	-	+	-	-	+	-	-	-	-	-	-	-
	R.QDQC[+57.021]IYN[+3009.074]TTYLNVQR.E	HexNAc(7)Hex(8)NeuAc(1)	-	-	-	+	-	-	-	-	-	-	-	-	-	-	-
	R.QDQC[+57.021]IYN[+3405.200]TTYLNVQR.E	HexNAc(6)Hex(9)Fuc(1)NeuAc(2)	-	-	-	-	-	-	-	-	-	+	-	-	-	-	-
N103	R.EN[+3517.228]GTISR.Y	HexNAc(6)Hex(7)NeuAc(4)	+	+	+	+	+	+	+	+	+	-	+	-	-	-	-
	R.EN[+2861.000]GTISR.Y	HexNAc(5)Hex(6)NeuAc(3)	+	+	+	+	+	+	+	+	+	-	-	-	-	-	-
	R.EN[+3372.190]GTISR.Y	HexNAc(6)Hex(7)Fuc(1)NeuAc(3)	+	+	+	+	+	+	+	+	+	-	-	-	-	-	-
	R.EN[+3663.286]GTISR.Y	HexNAc(6)Hex(7)Fuc(1)NeuAc(4)	+	+	+	+	+	+	+	+	+	-	-	-	-	-	-
	R.EN[+3226.132]GTISR.Y	HexNAc(6)Hex(7)NeuAc(3)	+	+	+	+	+	-	+	+	+	-	-	-	-	-	-
	R.EN[+2569.905]GTISR.Y	HexNAc(5)Hex(6)NeuAc(2)	+	+	+	-	-	+	+	-	-	-	-	-	-	-	-
	R.EN[+2715.963]GTISR.Y	HexNAc(5)Hex(6)Fuc(1)NeuAc(2)	-	-	-	+	-	-	+	-	-	-	-	-	-	-	-
	R.EN[+3007.058]GTISR.Y	HexNAc(5)Hex(6)Fuc(1)NeuAc(3)	-	-	-	-	-	+	-	+	-	-	-	-	-	-	-
	R.EN[+4028.418]GTISR.Y	HexNAc(7)Hex(8)Fuc(1)NeuAc(4)	-	-	+	-	-	-	-	+	-	-	-	-	-	-	-
	R.EN[+1913.677]GTISR.Y	HexNAc(4)Hex(5)NeuAc(1)	-	-	-	-	-	+	-	-	-	-	-	-	-	-	-
	R.EN[+2204.772]GTISR.Y	HexNAc(4)Hex(5)NeuAc(2)	-	-	-	-	-	-	+	-	-	-	-	-	-	-	-
	R.EN[+2878.015]GTISR.Y	HexNAc(5)Hex(7)Fuc(1)NeuAc(2)	-	-	-	-	-	-	+	-	-	-	-	-	-	-	-
	R.EN[+2935.037]GTISR.Y	HexNAc(6)Hex(7)NeuAc(2)	-	-	+	-	-	-	-	-	-	-	-	-	-	-	-
